# Supplementary material for: A high resolution A-to-I editing map in the mouse identifies editing events controlled by pre-mRNA splicing
Source: PubMed Central journal article supplement (PMC6724681; doi:10.1101/gr.242636.118), 2019-09
Supplement: supp_gr.242636.118_Supplemental_Material.pdf [file supp_gr.242636.118_Supplemental_Material.pdf]

## Supplemental Material

### **A high resolution A-to-I editing map in the mouse identifies editing events controlled by pre-mRNA splicing**

Konstantin Licht<sup>1</sup>, Utkarsh Kapoor<sup>1</sup>, Fabian Amman<sup>2</sup>, Ernesto Picardi<sup>3,4</sup>, David Martin<sup>1</sup>, Prajakta Bajad<sup>1</sup>, and Michael F. Jantsch<sup>1</sup>

- 1) Center for Anatomy and Cell Biology  
Medical University of Vienna  
Schwarzspanierstrasse 17  
A-1090 Vienna, AUSTRIA
- 2) Institute of Theoretical Biochemistry  
University of Vienna  
Waehringerstrasse, 17  
A-1090 Vienna, AUSTRIA
- 3) Department of Biosciences, Biotechnologies, and Biopharmaceutics  
University of Bari  
Via Orabona, 4  
I-70126 Bari, ITALY
- 4) Institute of Biomembranes, Bioenergetics and Molecular Biotechnologies  
National Research Council  
Via Amendola, 165A  
I-70126 Bari, ITALY

## Table of Contents

|                                    |            |
|------------------------------------|------------|
| Supplemental Figures:              | page 3-12  |
| Supplemental Tables:               | page 13-17 |
| Supplemental Material and Methods: | page 17    |
| Supplemental Datasets:             | page 18-41 |
| Supplemental References:           | page 42    |

## Supplemental Figures

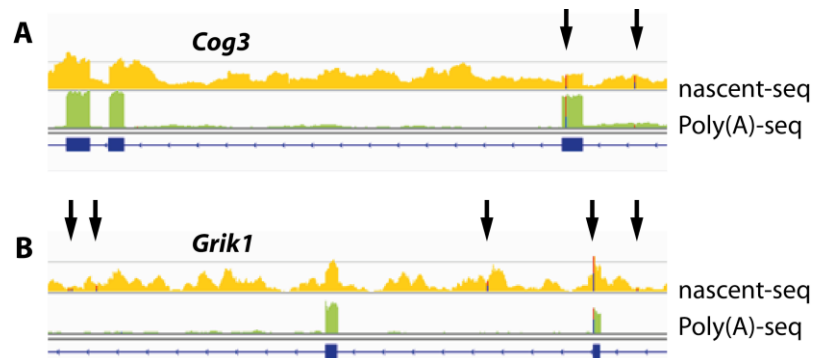

**Supplemental Figure S1.** The intronic coverage is higher for Nascent-seq than in poly(A) mRNA-seq. The coverage for two different edited transcripts (A) *Cog3*, and (B) *Grik1* is given for nascent-seq (yellow) and poly(A) mRNA-seq (green). The intron-exon structure of the gene is depicted below (blue); exons: bars; introns: thin lines. Editing sites are marked by arrows but can also be seen in the coverage profile (blue/red lines indicate mismatches).





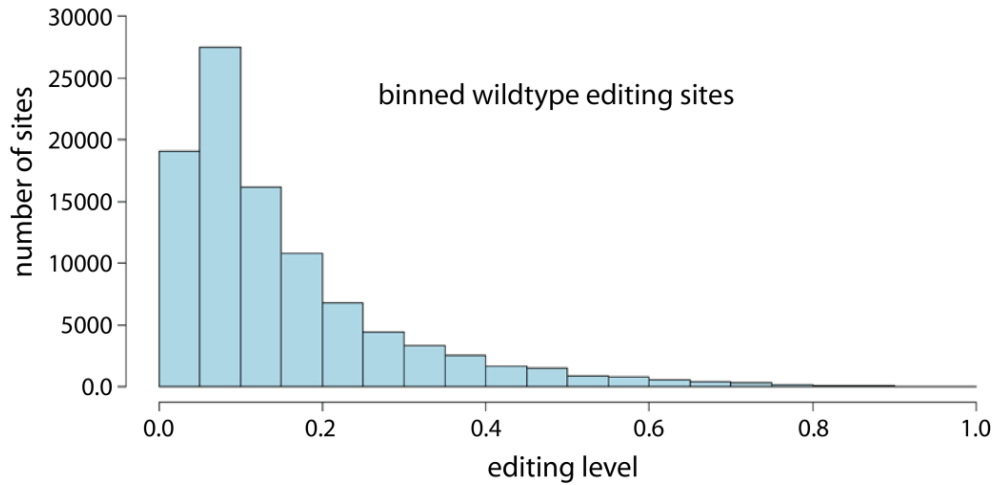

**Supplemental Figure S4.** The majority of editing sites identified using Nascent-seq in wildtype mice is edited below 20%. All editing sites have been binned according to their level of editing.

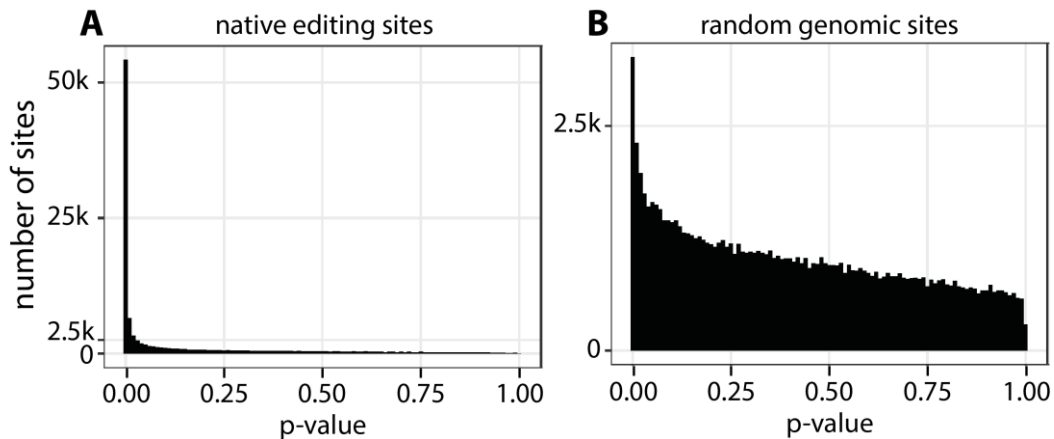

**Supplemental Figure S5.** (A, B) Comparison between bioinformatically predicted editing-complementary sequences (ECS) and randomized control sequences. (A) An empirical p-value was calculated by comparing the hybridization energy of the predicted ECS to the energies calculated from 1,000 dinucleotide shuffled input sequences. ECSs were accepted at a p-value level  $\leq 0.001$ . (B) To control the prediction, the same analysis was repeated with randomized editing site positions. Thereby, for each editing site an adenosine from the genome was randomly selected, but preserving its original genomic annotation and repeat status.

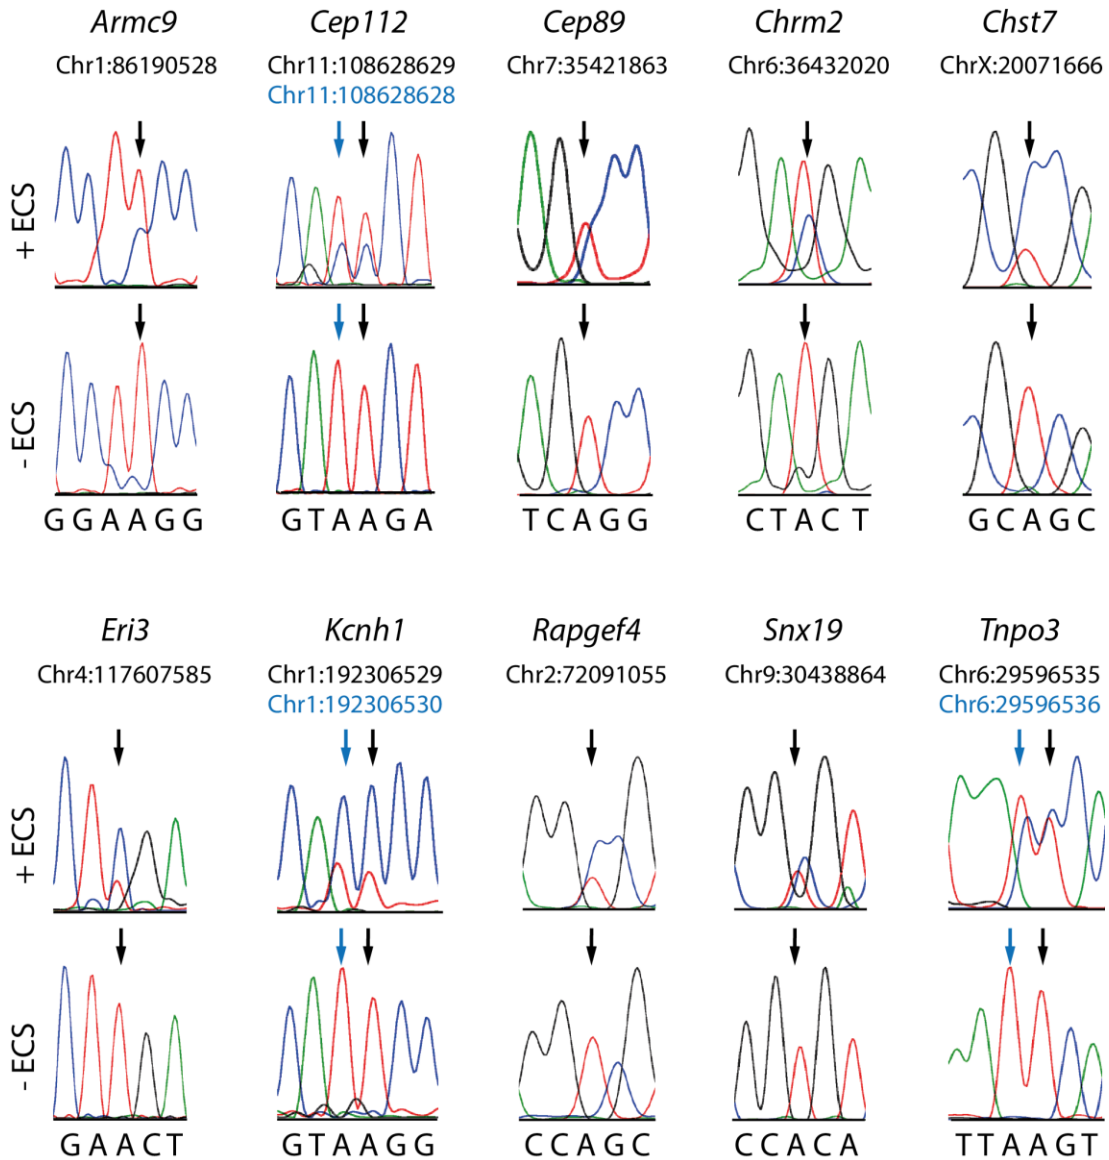

**Supplemental Figure S6.** Validation of bioinformatically predicted editing-complementary sequences (ECS). The genomic DNA encoding for edited transcripts and the corresponding predicted editing complementary sequence was cloned (+ ECS). Subsequently, the editing complementary region has been removed (the predicted secondary structure and the removed ECS (- ECS) regions is displayed in Supplemental Dataset S1). Following co-transfection with a plasmid coding for Flag-rADAR2 into HEK293 cells, RNA was isolated, reverse transcribed, amplified with target-specific primers, and submitted to Sanger sequencing. Genome coordinates: mm10.

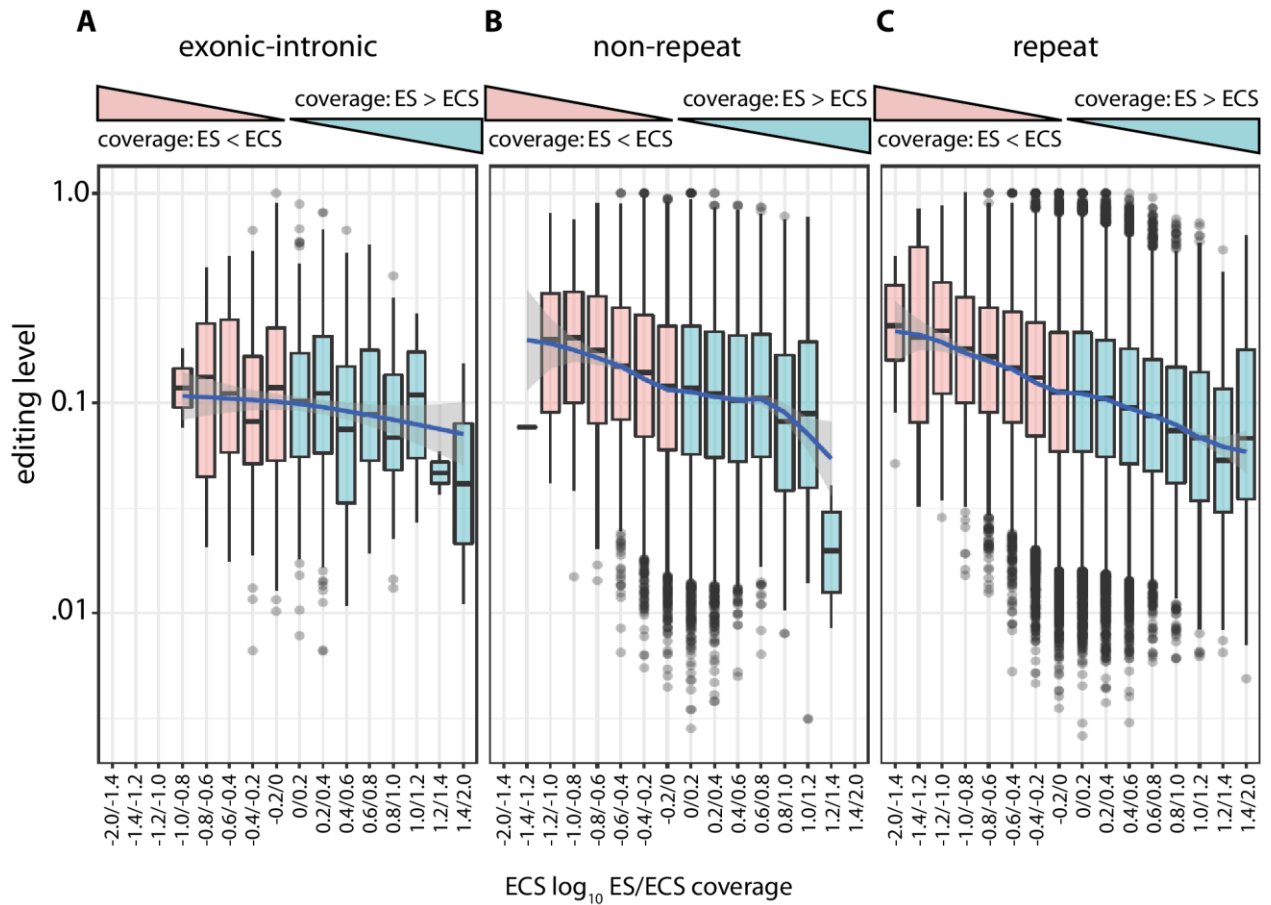

**Supplemental Figure S7.** The persistence of the ECS increases editing levels. (A-C) Boxplots showing binned editing sites according to their  $\log_{10}$  ES/ECS coverage (red:  $\log_{10}$  ES/ECS coverage < 0  $\rightarrow$  ES saturated with ECS; blue:  $\log_{10}$  ES/ECS coverage > 0  $\rightarrow$  ES deprived of ECS) and the respective editing level (left side). The analysis was done separately for (A) exonic editing sites with an intronic ECS (exonic-intronic), for (B) non-repeat associated sites, and for (C) repeat associated sites.



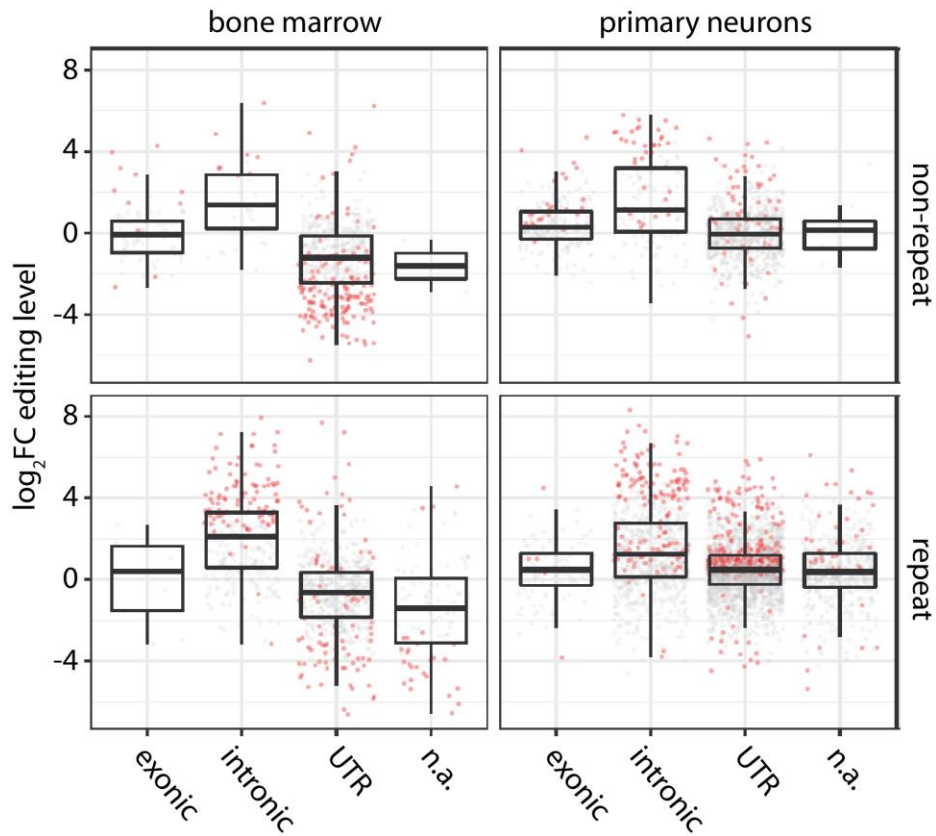

**Supplemental Figure S8.** Editing sites split according to their repeat status (compare to main figure 4).

The editing sites were split according to their repeat status (upper panels: non-repeat, lower panels: repeat). Only sites with a minimum read coverage of 10 are shown.

Boxplots showing the log<sub>2</sub> fold change (log<sub>2</sub>FC) for editing levels in untreated (DMSO) and treated (MEA) primary cells (left panels: bone marrow, right panels: primary neurons) separated into different genic locations as indicated below the panels (exonic, intronic, UTR, n.a.: not annotated/intergenic). Dots represent editing levels for individual sites that are changed significantly (red; p-value < 0.05) or not significantly (grey; p-value ≥ 0.05).

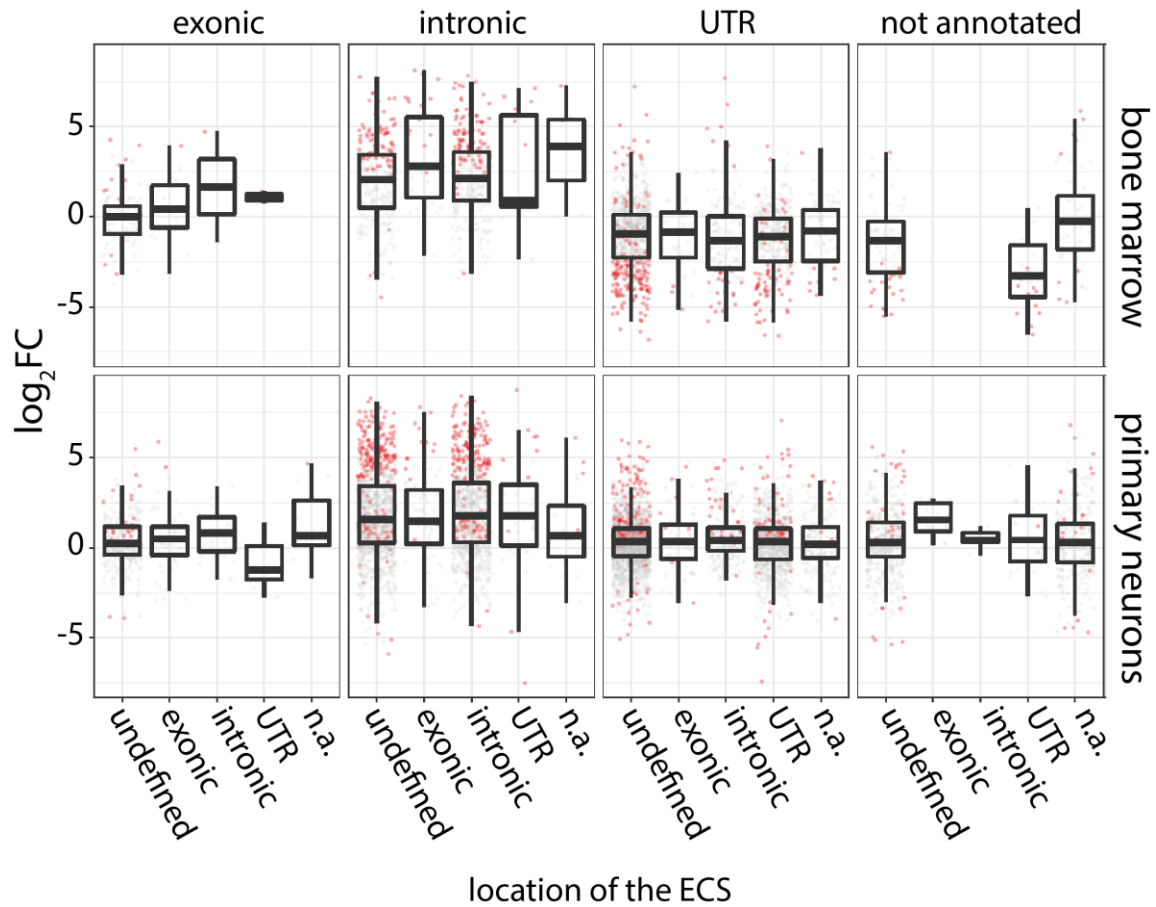

**Supplemental Figure S9.** Meayamycin treatment leads to increased editing levels in bone marrow and neuronal cells. Two primary cell types were treated with the splicing inhibitor meayamycin (MEA) or vehicle control (DMSO). RNA was isolated after treatment and poly(A)-selected RNA was subjected to RNA-seq. Boxplots showing the  $\log_2$  fold change ( $\log_2FC$ ) for editing levels in untreated (DMSO) and treated (MEA) primary cells (top panel: bone marrow, lower panel: primary neurons) separated into different genic locations as indicated on top of the panel (exonic, intronic, UTR, not-annotated i.e. intergenic). The location of the editing complementary site (ECS) is given below the panel (undefined: could not be identified; n.a.: not annotated/intergenic). Dots represent editing levels for individual sites that are changed significantly (red;  $p < 0.05$ ) or not significantly (grey;  $p \geq 0.05$ ).

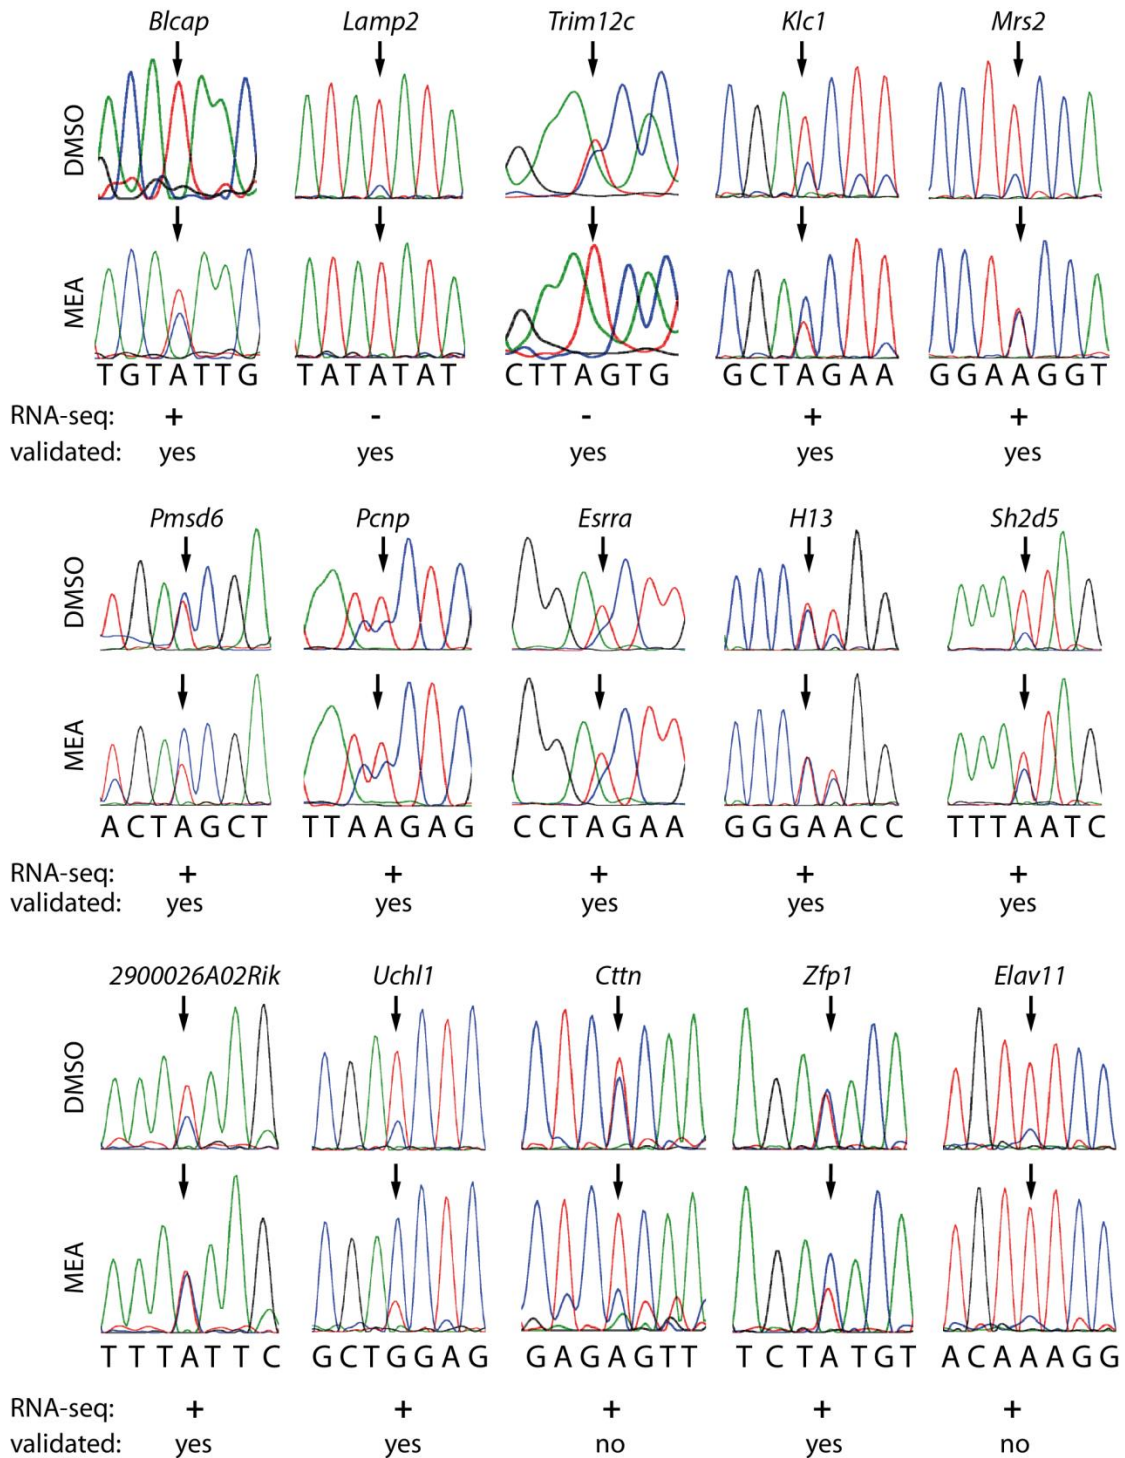

**Supplemental Figure S10.** Validation of changes in editing levels upon meayamycin treatment (compare to main figure 4). Sanger sequencing traces of all editing sites used for validation are shown (MEA=meayamycin; DMSO=DMSO vehicle control). The RNA-seq result is depicted below the chromatograms (RNA-seq + or - indicates an increase or decrease seen by RNA-seq). The result of the validation is shown as validated 'yes' or 'no'.

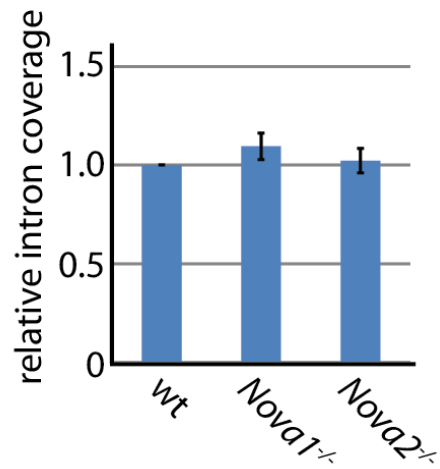

**Supplemental Figure S11.** Deletion of NOVA1 or NOVA2 proteins does not perturb overall splicing efficiency. Re-analysis of publicly available RNA-seq data from cortices of 6 wildtype and 3 *Nova1<sup>-/-</sup>* and 3 *Nova2<sup>-/-</sup>* mice (please compare to main figure 5). The reads have been mapped to the mouse genome (mm10). The relative intron coverage for editing sites in wildtype, *Nova1<sup>-/-</sup>*, and *Nova2<sup>-/-</sup>* mice is given. Error bars=s.e.m.

## Supplemental Tables S1-S8

**Supplemental Table S1.** Primer sequences (5' – 3') used for validation of the Nascent-seq (Nasc.) editing sites and the editing sites with significantly changed editing levels upon meayamycin (Mea) treatment.

| Target               | For   | forward                  | reverse                   |
|----------------------|-------|--------------------------|---------------------------|
| <i>Camk2a</i>        | Nasc. | CAACCATGGTCCCACATCCA     | CCCTGCTGAACTCTGGACTG      |
| <i>Rims1</i>         | Nasc. | TCTGTTGCACTAAACCAGGAAA   | GCTGTTCCCTCTCTCTGTTCA     |
| <i>Asic2</i>         | Nasc. | TGGAAGCAGAGGGTAAAAGG     | GAGCTGATGCAGAAGCAATG      |
| <i>Asic2</i>         | Nasc. | CAGGACCGGAACTCAAACAT     | TGTGGGTCTGGGAATAAAA       |
| <i>Fam193a</i>       | Nasc. | CATCTGTCCCACCTTCTGGT     | TGGCTGTCTATTGATCGATGT     |
| <i>Kctd8</i>         | Nasc. | TCGTCATCAGAGAGGCTTCAT    | AATTCTTGCTTCAGTCTCTGTGT   |
| <i>Cadps2</i>        | Nasc. | ATTGGACTGAGCACCAGGTC     | CTCGAGCCTTCTCAGGATGA      |
| <i>Mical</i>         | Nasc. | AGTGCAGCTGCTCCTTCTA      | CGGTCTCACTATGTAGCTCTGG    |
| <i>Usp3</i>          | Nasc. | ATAAGCCCTGGAGCTGGAGT     | CCAGCTCTCACTCCCTTCTTT     |
| <i>Ftx</i>           | Nasc. | CATTTCAATTTAGCACGCAGA    | TGGGCTGACATACTGGCATA      |
| <i>Blcap</i>         | Mea.  | TGTGTTGACTTTTCTCTTCAGGA  | CCCATGAACATGGAGTGGCT      |
| <i>Lamp2</i>         | Mea.  | TGGGGAGGACAGATTAATGCC    | CAGTTCCTGTTGCTCCAGA       |
| <i>Trim12c</i>       | Mea.  | AGGGTAGAGCATCCACTGAATTAT | GGTACCTTATTCATTTGGGGTCTTT |
| <i>Klc1</i>          | Mea.  | GTGTGTTTCATGCCAGCCTG     | ACACCTGACGCTCACTGAAG      |
| <i>Mrs2</i>          | Mea.  | AACTAAGGGCTGTGGCTGTG     | TCTGCTGTCCCAGAGAACCT      |
| <i>Pmsd6</i>         | Mea.  | TGCTAGTGTTTTGGGGGCTT     | AGCATGTATGGGCAGTGGAG      |
| <i>Pcnp</i>          | Mea.  | ACACATAAACAGAAGGCTTTGCT  | CAGACAGCTGTGAGATGCCA      |
| <i>Esrra</i>         | Mea.  | GCTGCCTCTGTGTATCACCA     | GCAGAAGCAGACAGAGCTCT      |
| <i>H13</i>           | Mea.  | AGCAGCCTTCAAGATTCCCT     | AGCTAGGTGACCCTGGGAAA      |
| <i>Sh2d5</i>         | Mea.  | GGCAGTCCAGGGACAGATTC     | TGGCTGTCTGGAATTTGCT       |
| <i>2900026A02Rik</i> | Mea.  | GCAGGGACAGATGGGATCAG     | TCAAGCAGGTCAGGAAGCAG      |
| <i>Uchl1</i>         | Mea.  | CTGGGTATGGGTCAGCCTTG     | GTCTGTGTGTTGGGTTTGTGC     |
| <i>Cttn</i>          | Mea.  | TTGTGCTAACTGGCCCTGAG     | CCAACTCACACAAGCTGTCC      |
| <i>Zfp1</i>          | Mea.  | ACTCAGGGGGTTAATTGGT      | AGGTGGTGGTGCACATCTTT      |
| <i>Elav11</i>        | Mea.  | AGGTAGAGGCAAGAGGACCA     | GGAAGGGCAGTGAGTCTTCA      |

**Supplemental Table S2.** Comparison between A-to-I editing levels detected by Nascent-seq and Sanger sequencing, respectively. Genome coordinates: mm10.

| Gene         | Chromosome | Position | Percent A-to-I editing |               | Validated |
|--------------|------------|----------|------------------------|---------------|-----------|
|              |            |          | by nascent-seq         | by Sanger-seq |           |
| <i>Asic2</i> | Chr11      | 81850116 | 24%                    | 43%           | Yes       |
| <i>Asic2</i> | Chr11      | 81855010 | 38%                    | 29%           | Yes       |
| <i>Asic2</i> | Chr11      | 81855013 | 16%                    | 16%           | Yes       |
| <i>Asic2</i> | Chr11      | 81855050 | 39%                    | 30%           | Yes       |
| <i>Asic2</i> | Chr11      | 81855086 | 14%                    | 12%           | Yes       |
| <i>Asic2</i> | Chr11      | 81855102 | 47%                    | 45%           | Yes       |

|                |       |           |      |     |     |
|----------------|-------|-----------|------|-----|-----|
| <i>Asic2</i>   | Chr11 | 81855103  | 34%  | 45% | Yes |
| <i>Asic2</i>   | Chr11 | 81855116  | 44%  | 52% | Yes |
| <i>Asic2</i>   | Chr11 | 81855182  | 59%  | 42% | Yes |
| <i>Asic2</i>   | Chr11 | 81855188  | 10%  | 0%  | No  |
| <i>Camk2a</i>  | Chr18 | 60954690  | 100% | 55% | Yes |
| <i>Fam193a</i> | Chr5  | 34477808  | 33%  | 38% | Yes |
| <i>Kctd8</i>   | Chr5  | 69271420  | 14%  | 13% | Yes |
| <i>Kctd8</i>   | Chr5  | 69271488  | 47%  | 52% | Yes |
| <i>Kctd8</i>   | Chr5  | 69271501  | 12%  | 12% | Yes |
| <i>Cadps2</i>  | Chr6  | 23797919  | 35%  | 44% | Yes |
| <i>Cadps2</i>  | Chr6  | 23797920  | 60%  | 71% | Yes |
| <i>Mical</i>   | Chr6  | 120964212 | 16%  | 11% | Yes |
| <i>Usp3</i>    | Chr9  | 66539721  | 14%  | 17% | Yes |
| <i>Ftx</i>     | ChrX  | 103582512 | 25%  | 26% | Yes |
| <i>Ftx</i>     | ChrX  | 103582515 | 55%  | 57% | Yes |
| <i>Ftx</i>     | ChrX  | 103582533 | 11%  | 13% | Yes |

**Supplemental Table S3.** Editing sites identified by Nascent-seq. Available as separate xlsx-file.

**Supplemental Table S4.** Primers used to clone randomly selected editing sites and editing complementary sites into pcDNA3.1<sup>(+)</sup>. Fw primer 1 and rev primer 1 (fw 1, rev 1) denote the primer pair used to clone the original sequence. Fw primer 2 in combination with rev primer 1 (fw 2, rev 1) and vice versa was used to amplify the DNA without ECS. No 1 and No 2: restriction enzymes used.

| Gene          | Primers | Sequences                                     | No 1  | No 2 |
|---------------|---------|-----------------------------------------------|-------|------|
| <i>Armc9</i>  | fw 1    | ATATTCTAGACCTGGGCTTCTTGCTGAGAA                | XbaI  | KpnI |
|               | rev 1   | ATATGGTACCAGATGGGAGAGAGTTGCCT                 |       |      |
|               | fw 2    | TCCCCAAGTGACATTTAAGTACAAACCAGGATGTGTCAAGCAC   |       |      |
|               | rev 2   | GTGCTTGACACATCCTGGTTTGTACTTAAAATGTCACCTGGGGAA |       |      |
| <i>Cep112</i> | fw 1    | ATATGAATTCACCTTCCAGATGAACAACGTTACTTT          | EcoRI | KpnI |
|               | rev 1   | ATATGGTACCTGGAAACAGGATAACAGAGGCC              |       |      |
|               | fw 2    | GGAAGTTTTACAAACAGCAGTTGAGTTTTACTGGGACAGTTGTAC |       |      |
|               | rev 2   | GTACAACTGTCCAGTAAACTCAACTGCTGTTTGTAAACTTCC    |       |      |
| <i>Cep89</i>  | fw 1    | ATATGAATTCACCTGTTCCATCTTGTGAACCT              | EcoRI | KpnI |
|               | rev 1   | ATATGGTACCCCAAAAGCCTGCAATGTT                  |       |      |
|               | fw 2    | AATCTGGGTCGGGCTGGTACGCCCTTCTGGAGTG            |       |      |
|               | rev 2   | CACTCCAGAAGAGGGCGTACCAGCCGACCCAGATT           |       |      |
| <i>Chrm2</i>  | fw 1    | ATATGAATTCTTGTAAAGTTATAGACAAATGTGTGT          | EcoRI | KpnI |
|               | rev 1   | ATATGGTACCGTCCACATAATTCATCAAACCTTAGGA         |       |      |
|               | fw 2    | GAAGGGGTGTTTCTGAGTTAATGGCAGACAAAGAATTGTGATCTG |       |      |
|               | rev 2   | CAGATACAATTCTTCTGTGCCATTAACCTAGAAACACCCCTTC   |       |      |
| <i>Chst7</i>  | fw 1    | ATATTCTAGATGCTAAGTGGATTGTTTCATTTAAAA          | XbaI  | KpnI |
|               | rev 1   | ATATGGTACCAGCCATACACCCTAAATATGGATAT           |       |      |
|               | fw 2    | TTCAGACACACCAAAAGAGGGCCACTGAGCCATCTCACCA      |       |      |

|                |       |                                                  |       |      |
|----------------|-------|--------------------------------------------------|-------|------|
|                | rev 2 | TGGTGAGATGGCTCAGTGGCCCTCTTTTGGTGTGTCTGAA         |       |      |
| <i>Eri3</i>    | fw 1  | ATATGAATTCCAACAGCTGTGTCTTGTGC                    | EcoRI | KpnI |
|                | rev 1 | ATATGGTACCGCAGCAGTGTCTCAACTGC                    |       |      |
|                | fw 2  | CTTCTGTCTAGGAAGGAACATAAGTGATGGGAACAGAGGCC        |       |      |
|                | rev 2 | GGCCTCTGTTCCCATCACTTATGTTCTTCTAGACAGGAAG         |       |      |
| <i>Kcnh1</i>   | fw 1  | ATATTCTAGATTCCCAGACCCGAATACT                     | XbaI  | KpnI |
|                | rev 1 | ATATGGTACCAGGATGCTAGCTTCTGGTT                    |       |      |
|                | fw 2  | GGTGGTTATAGAAAAGTCAACACTAAGCACACACAGGCCTCCAG     |       |      |
|                | rev 2 | CTGGAGGCCTGTGTGTGCTTAGTGTGACTTTTCTATAACCACC      |       |      |
| <i>Raf1</i>    | fw 1  | ATATGAATTCGACTCAAGAGACGTGGCCAA                   | EcoRI | KpnI |
|                | rev 1 | ATATGGTACCTGCTGAGTGAATCACGTGTT                   |       |      |
|                | fw 2  | CTTTAATCCAGCACTCGGTCTCGAAAAAACCAAAAAAAAAAAAAAAAA |       |      |
|                | rev 2 | TTTTTTTTTTTTTTGGTTTTTTCGAGACCGAGTGCTGGGATTAAG    |       |      |
| <i>Rapgef4</i> | fw 1  | ATATGAATTCTGCTAAGGAGTAGAGACTTGGAGA               | EcoRI | KpnI |
|                | rev 1 | ATATGGTACCACGCAACGTCTCTATTTTGGAG                 |       |      |
|                | fw 2  | GATCTGAGATCCTCTGGGACAGCCATCCAACCTCCAACC          |       |      |
|                | rev 2 | GGTTGGAGAGTTGGATGGCTGTCCAGAGGATCTCAGATC          |       |      |
| <i>Snx19</i>   | fw 1  | ATATCTCGAGGGTGGCAGCTGCAGATAGAT                   | XhoI  | KpnI |
|                | rev 1 | ATATGGTACCCTCCTACAGACCCACCTCGA                   |       |      |
|                | fw 2  | TAGAGAGTAGACACTTCTTGCGAAATTGGTAAATGTCATGGC       |       |      |
|                | rev 2 | GCCATGACATTTACCAATTTGCAAGAAGTGTCTACTCTCTA        |       |      |

**Supplemental Table S5.** Oligonucleotides used to amplify and sequence the editing sites in the test constructs used to validate the accuracy of the ECS prediction. Please note that some primers match to the vector sequence and are common to several targets. Fw/rev primer=oligonucleotides used to amplify the sequence. Sanger=primer used for Sanger sequencing.

| Gene           | fw primer                 | rev primer               | Sanger                     |
|----------------|---------------------------|--------------------------|----------------------------|
| <i>Kcnh1</i>   | ATCCAACAGGAGGCTAGT        | GCTGATCAGCGGTTAACTT      | GGTGGTTATAGAAAAGTCAACACTCC |
| <i>Armc9</i>   | CAGGTCAGAGCCAGGAGACA      | GCTGATCAGCGGTTAACTT      | TCTGGGAAGGCATTCAATTTGT     |
| <i>Cep112</i>  | ACCAGAGGCTCAACACATGG      | GCTGATCAGCGGTTAACTT      | TCTGGGAAGGCATTCAATTTGT     |
| <i>Eri3</i>    | CGGCATGGACTGGAGAG         | GCTGATCAGCGGTTAACTT      | GCCACCTTCCAGCTCTTTC        |
| <i>Chst7</i>   | GGAGACCCAAGCTGGCTAG       | GTGTACGCCAGAAAAAGTGCA    | GTGTACGCCAGAAAAAGTGCA      |
| <i>Snx19</i>   | GGAGACCCAAGCTGGCTAG       | TGTGTGTGTATGTATGTGAAGA   | TGTGTGTGTATGTATGTGAAGA     |
| <i>Cep89</i>   | GGAGACCCAAGCTGGCTAG       | TGCTCTAAAAATCCAAAGTCCAGG | TGCTCTAAAAATCCAAAGTCCAGG   |
| <i>Rapgef4</i> | GGAGACCCAAGCTGGCTAG       | TCATCCGATTCCTGGAAGT      | TCATCCGATTCCTGGAAGT        |
| <i>Raf1</i>    | AGCAGCACAGCATTGATCCT      | AAAGTGCACGCCTTAAAGCC     | AAAGTGCACGCCTTAAAGCC       |
| <i>Chrm2</i>   | AGTGCTGTTACAAATGCCTAAAAGT | GCTGATCAGCGGTTAACTT      | AGTGCTGTTACAAATGCCTAAAAGT  |

**Supplemental Table S6.** Editing sites identified in bone marrow and primary neurons plus changes in editing levels upon splicing inhibition. Available as separate xlsx-file.

**Supplemental Table S7.** Editing sites identified in *Nova1<sup>-/-</sup>* and *Nova2<sup>-/-</sup>* knockout mice plus changes in editing levels as compared to wildtype. Available as separate xlsx-file.

**Supplemental Table S8.** Best evidence and a reference for the location of editing complementary sites (ECS) for the editing targets used in main figure 6 are listed. The structure prediction has been done using RNAfold and visualized using forna. All structure predictions are shown in Supplemental Dataset S2. We define the ECS\_type as intronic if the editing-competent double-stranded RNA is formed between the edited exon and the downstream or upstream intron. Vice versa we call the ECS\_type exonic if the editing-competent stem is formed within the edited exon. Genome coordinates: hg19.

| Gene           | Chr.  | Coordinate | ECS_type | Best evidence        | Reference                         |
|----------------|-------|------------|----------|----------------------|-----------------------------------|
| <i>Best1</i>   | Chr11 | 61724916   | intronic | structure prediction | this study                        |
| <i>Flna</i>    | ChrX  | 153579950  | intronic | mutational analysis  | (Jain et al. 2018)                |
| <i>Flnb</i>    | Chr3  | 58141801   | intronic | mutational analysis  | Pullirsch et al. (unpublished)    |
| <i>Cog3</i>    | Chr13 | 46090371   | intronic | structure prediction | this study                        |
| <i>Copa</i>    | Chr1  | 160302244  | intronic | structure prediction | this study                        |
| <i>Gria2</i>   | Chr4  | 158257875  | intronic | mutational analysis  | (Higuchi et al. 1993)             |
| <i>Gria2</i>   | Chr4  | 158257879  | intronic | mutational analysis  | (Higuchi et al. 1993)             |
| <i>Gria2</i>   | Chr4  | 158281294  | intronic | mutational analysis  | (Lomeli et al. 1994)              |
| <i>Gria3</i>   | ChrX  | 122598962  | intronic | mutational analysis  | (Lomeli et al. 1994)              |
| <i>Gria4</i>   | Chr11 | 105804694  | intronic | mutational analysis  | (Lomeli et al. 1994)              |
| <i>Grik1</i>   | Chr21 | 30953750   | intronic | mutational analysis  | (Herb et al. 1996)                |
| <i>Grik2</i>   | Chr6  | 102372572  | intronic | mutational analysis  | (Herb et al. 1996)                |
| <i>Grik2</i>   | Chr6  | 102372589  | intronic | mutational analysis  | (Herb et al. 1996)                |
| <i>Neil1</i>   | Chr15 | 75646087   | intronic | mutational analysis  | (Yeo et al. 2010)                 |
| <i>Neil1</i>   | Chr15 | 75646086   | intronic | mutational analysis  | (Yeo et al. 2010)                 |
| <i>Tmem63b</i> | Chr6  | 44120349   | intronic | structure prediction | this study                        |
| <i>Azin1</i>   | Chr8  | 103841636  | exonic   | structure prediction | this study                        |
| <i>Blcap</i>   | Chr20 | 36147563   | exonic   | structure prediction | this study                        |
| <i>Cacna1d</i> | Chr3  | 53820892   | exonic   | structure prediction | this study                        |
| <i>Cadps</i>   | Chr3  | 62423807   | exonic   | structure prediction | this study                        |
| <i>Cdk13</i>   | Chr7  | 39990302   | exonic   | structure prediction | (Maas et al. 2011); this study    |
| <i>Dcaf16</i>  | Chr4  | 17805279   | exonic   | structure prediction | this study                        |
| <i>Elfn2</i>   | Chr22 | 37770174   | exonic   | structure prediction | this study                        |
| <i>Gabra3</i>  | ChrX  | 151358319  | exonic   | mutational analysis  | (Ohlson et al. 2007)              |
| <i>Gipc1</i>   | Chr19 | 14593693   | exonic   | structure prediction | this study                        |
| <i>Grm4</i>    | Chr6  | 34100903   | exonic   | structure prediction | this study                        |
| <i>Igfbp7</i>  | Chr4  | 57976234   | exonic   | structure prediction | (Gommans et al. 2008); this study |
| <i>Igfbp7</i>  | Chr4  | 57976286   | exonic   | structure prediction | (Gommans et al. 2008); this study |
| <i>Kcna1</i>   | Chr12 | 5021742    | exonic   | mutational analysis  | (Bhalla et al. 2004); this study  |
| <i>Kcnma1</i>  | Chr10 | 79397298   | exonic   | structure prediction | this study                        |
| <i>Mll4</i>    | Chr19 | 36211399   | exonic   | structure prediction | this study                        |
| <i>Myo19</i>   | Chr17 | 34866719   | exonic   | structure prediction | this study                        |
| <i>Nova1</i>   | Chr14 | 26917515   | exonic   | structure prediction | (Irimia et al. 2012); this study  |
| <i>Osgep</i>   | Chr14 | 20920211   | exonic   | structure prediction | this study                        |
| <i>Pdcd7</i>   | Chr15 | 65425319   | exonic   | structure prediction | this study                        |
| <i>Pdcd7</i>   | Chr15 | 65425334   | exonic   | structure prediction | this study                        |



|               |       |           |        |                      |            |
|---------------|-------|-----------|--------|----------------------|------------|
| <i>Pdcd7</i>  | Chr15 | 65425992  | exonic | structure prediction | this study |
| <i>Pdcd7</i>  | Chr15 | 65426067  | exonic | structure prediction | this study |
| <i>Plch2</i>  | Chr1  | 2436080   | exonic | structure prediction | this study |
| <i>Sh3bp2</i> | Chr4  | 2835556   | exonic | structure prediction | this study |
| <i>Son</i>    | Chr21 | 34923319  | exonic | structure prediction | this study |
| <i>Son</i>    | Chr21 | 34924105  | exonic | structure prediction | this study |
| <i>Son</i>    | Chr21 | 34922801  | exonic | structure prediction | this study |
| <i>Ttll3</i>  | Chr3  | 9876560   | exonic | structure prediction | this study |
| <i>Unc80</i>  | Chr2  | 210835613 | exonic | structure prediction | this study |

## Supplemental Materials and Methods

### Experimental validation of editing complementary site (ECS) predictions

A DNA sequence encompassing the randomly selected editing site and the predicted ECS was amplified from genomic mouse DNA and cloned into pcDNA3.1<sup>(+)</sup> using primers fw 1 and rev 1 (Supplemental Table S4). To remove the ECS primers fw 1/rev 2 and fw 2/rev 1 were used, respectively. Subsequently, both PCR products were combined and again amplified with primers fw 1 and rev 1. Restriction enzymes were used as indicated (Supplemental Table S4). To test editing,  $3 \times 10^5$  Hek293 cells were plated per well using 6-well dishes. 24 h after plating, 0.5  $\mu$ g of plasmid (plus or minus ECS) was co-transfected with 3.5  $\mu$ g of a plasmid expressing Flag-rADAR2 using poly-ethyleneimine (Polysciences cat# 23966). 2 days after transfection RNA was isolated using Trifast<sup>TM</sup> (Peqlab cat# 30-2010) following the manufacturer's instructions. Subsequently, RNA was DNase I treated (New England Biolabs, cat# M0303). Following reverse transcription with random hexamers (Integrated DNA Technologies) and M-MuLV reverse transcriptase (New England Biolabs, cat# M0253) the editing site was PCR amplified using OneTaq Green PCR mix (New England Biolabs, cat# M0482) and primer pairs as indicated (Supplemental Table S5). Following gel extraction using Monarch<sup>®</sup> DNA Gel Extraction Kit (New England Biolabs, cat# T1020) the PCR product was submitted to Sanger sequencing (Eurofins Genomics) using the primer as indicated (Supplemental Table S5). If not stated otherwise all custom primers were obtained from Microsynth Austria.

## Supplemental Datasets

Supplemental Dataset S1: Structure predictions to validate bioinformatically predicted ECS. The structure has been predicted using RNAfold and visualized using forna (Lorenz et al. 2011; Kerpedjiev et al. 2015). The editing site is shown in red; the editing complementary site is highlighted in blue. Light blue indicates the sequence that has been deleted in the deltaECS constructs.

Transcript: *Armc9*

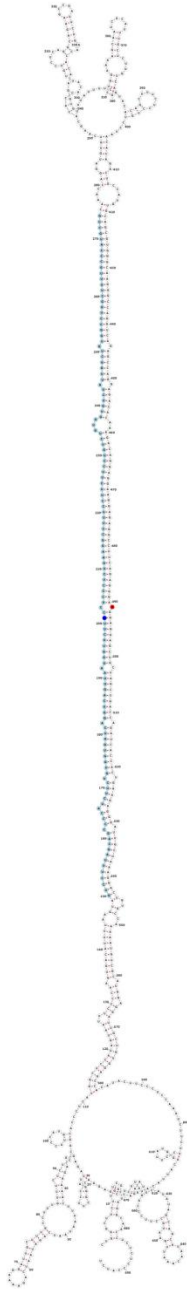

Transcript: *Cep89*

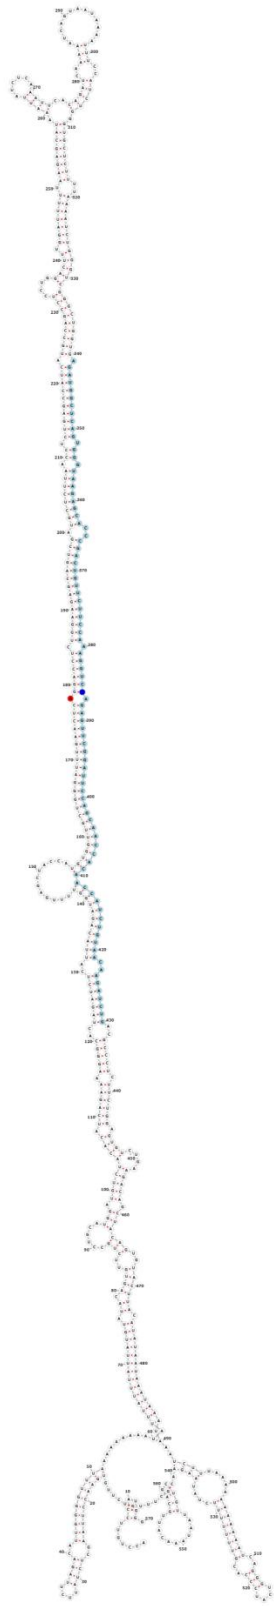

Transcript: *Cep112*

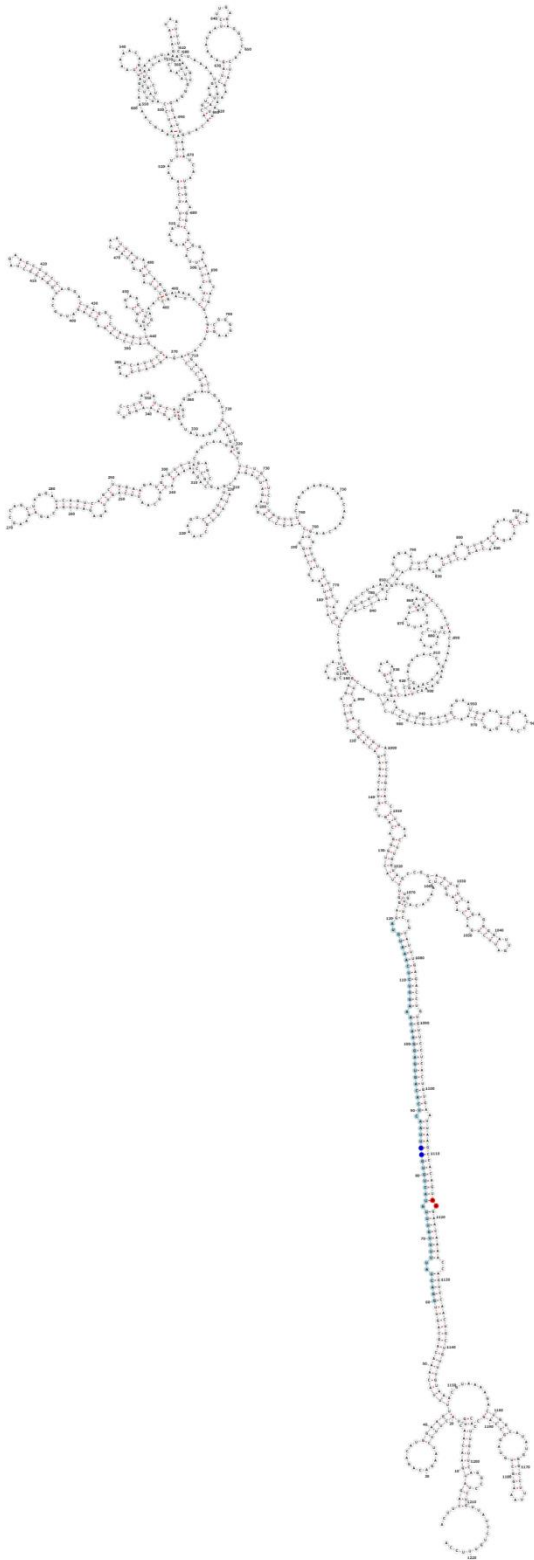

Transcript: *Chrm2*

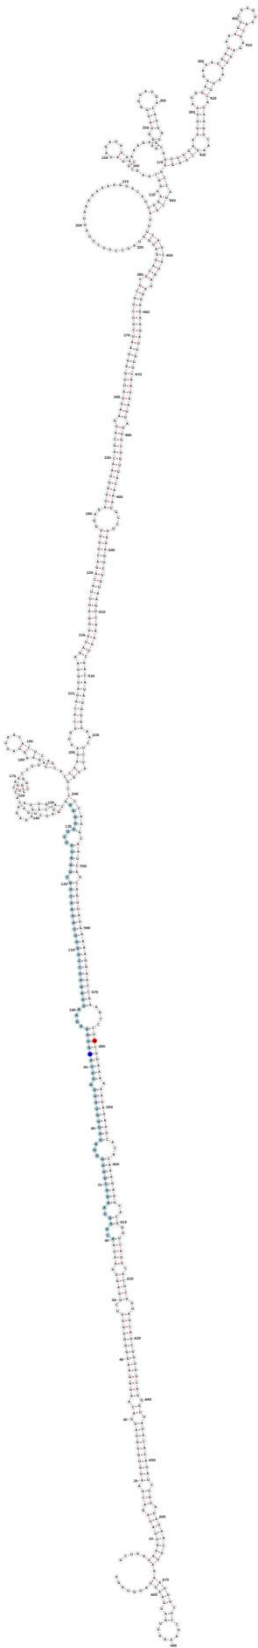

Transcript: *Chst7*

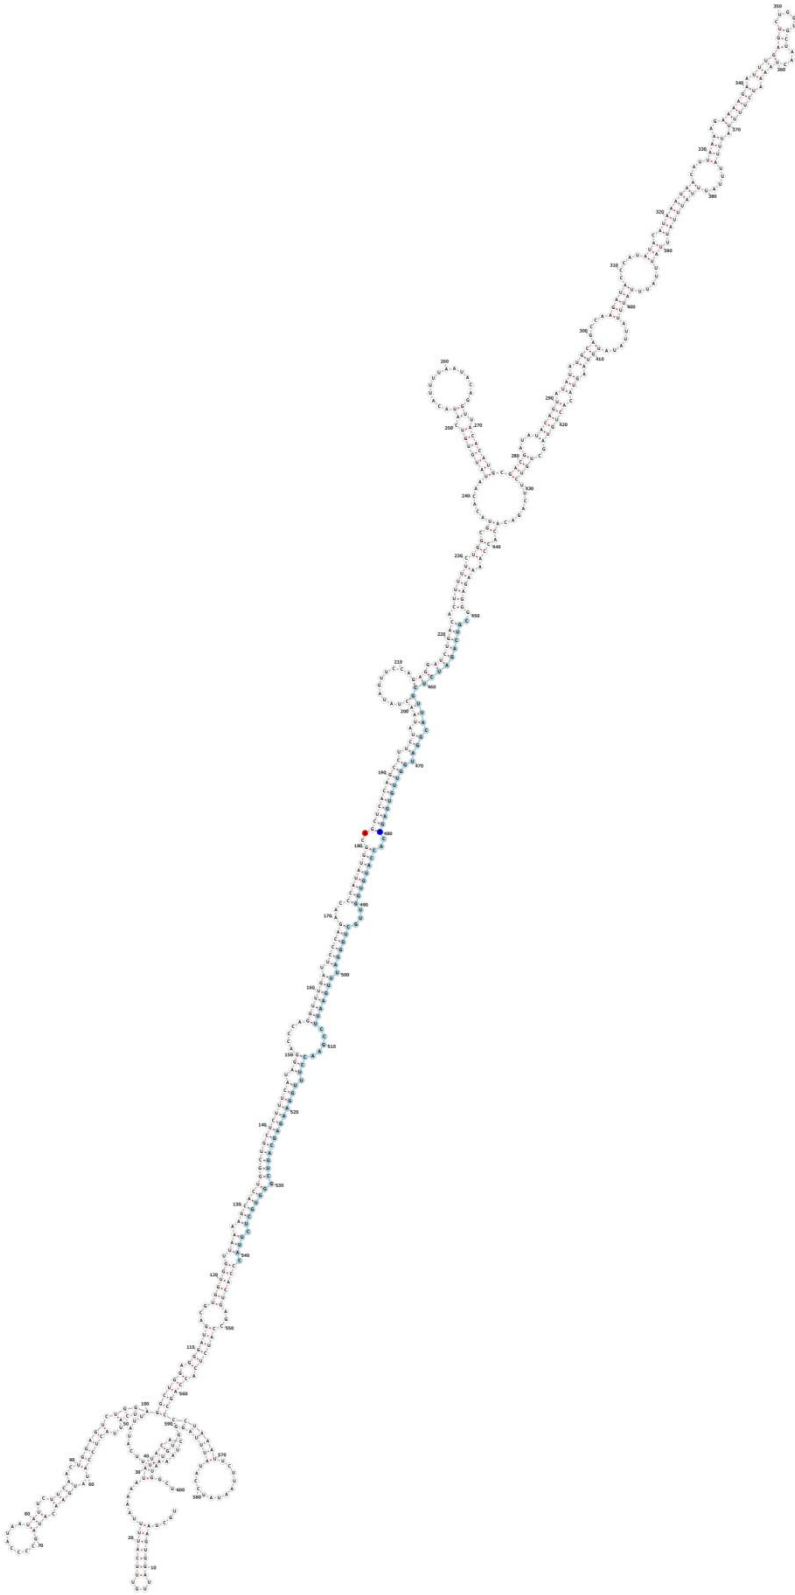

Transcript: *Eri3*

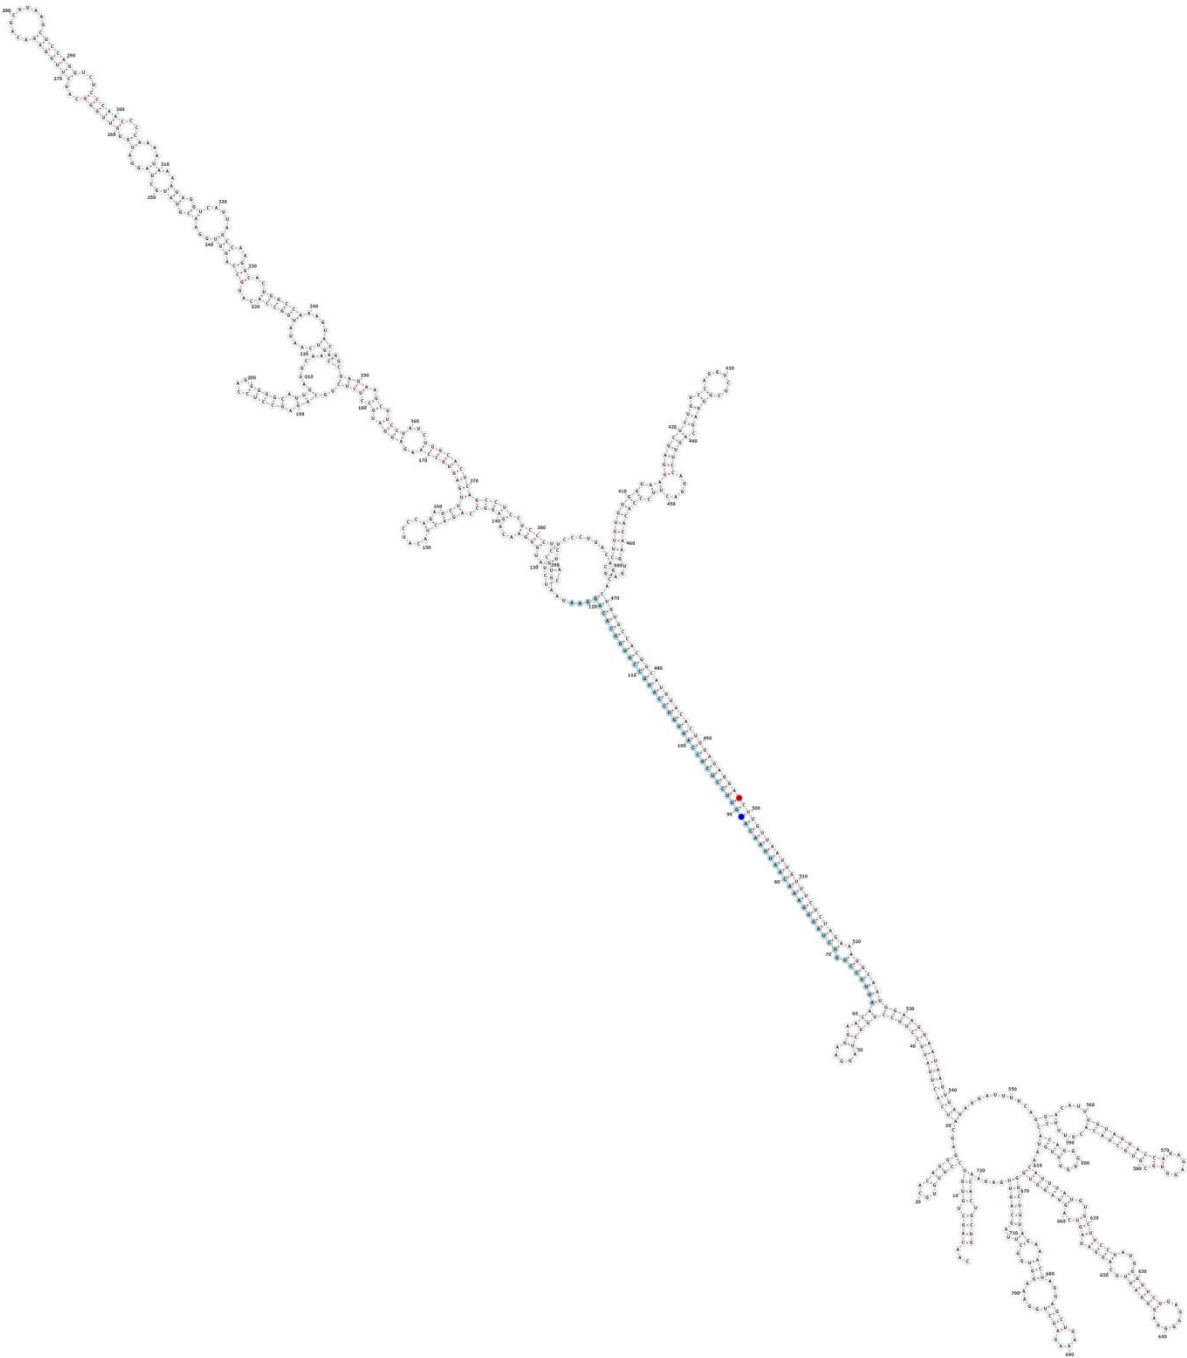

Transcript: *Kcnh1*

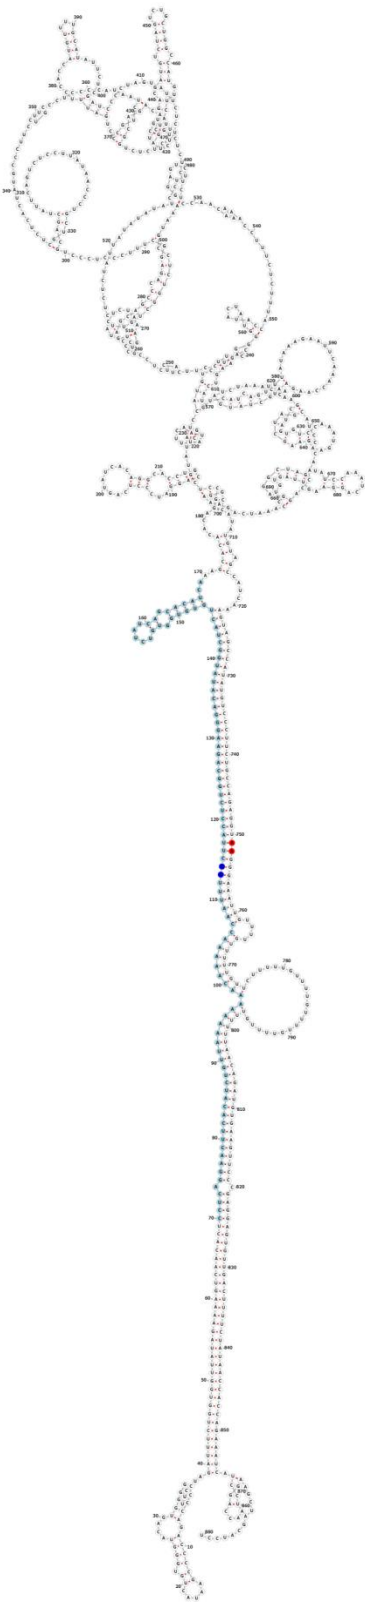



Transcript: *Rapgef4*

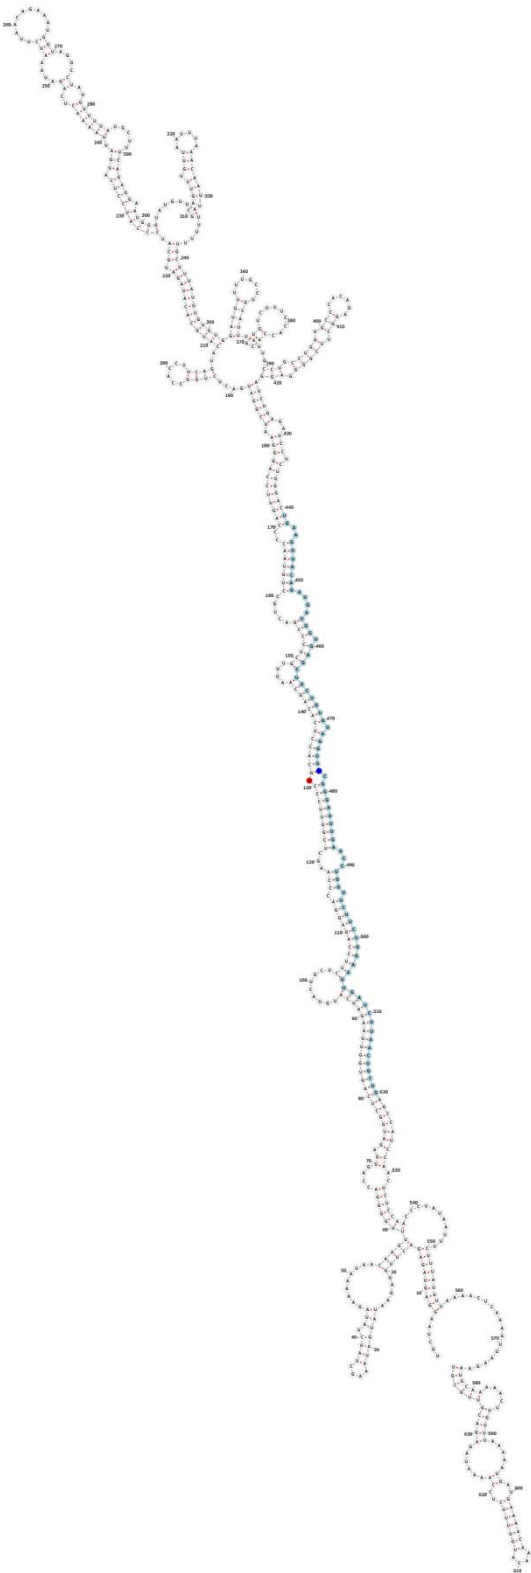

Transcript: *Snx19*

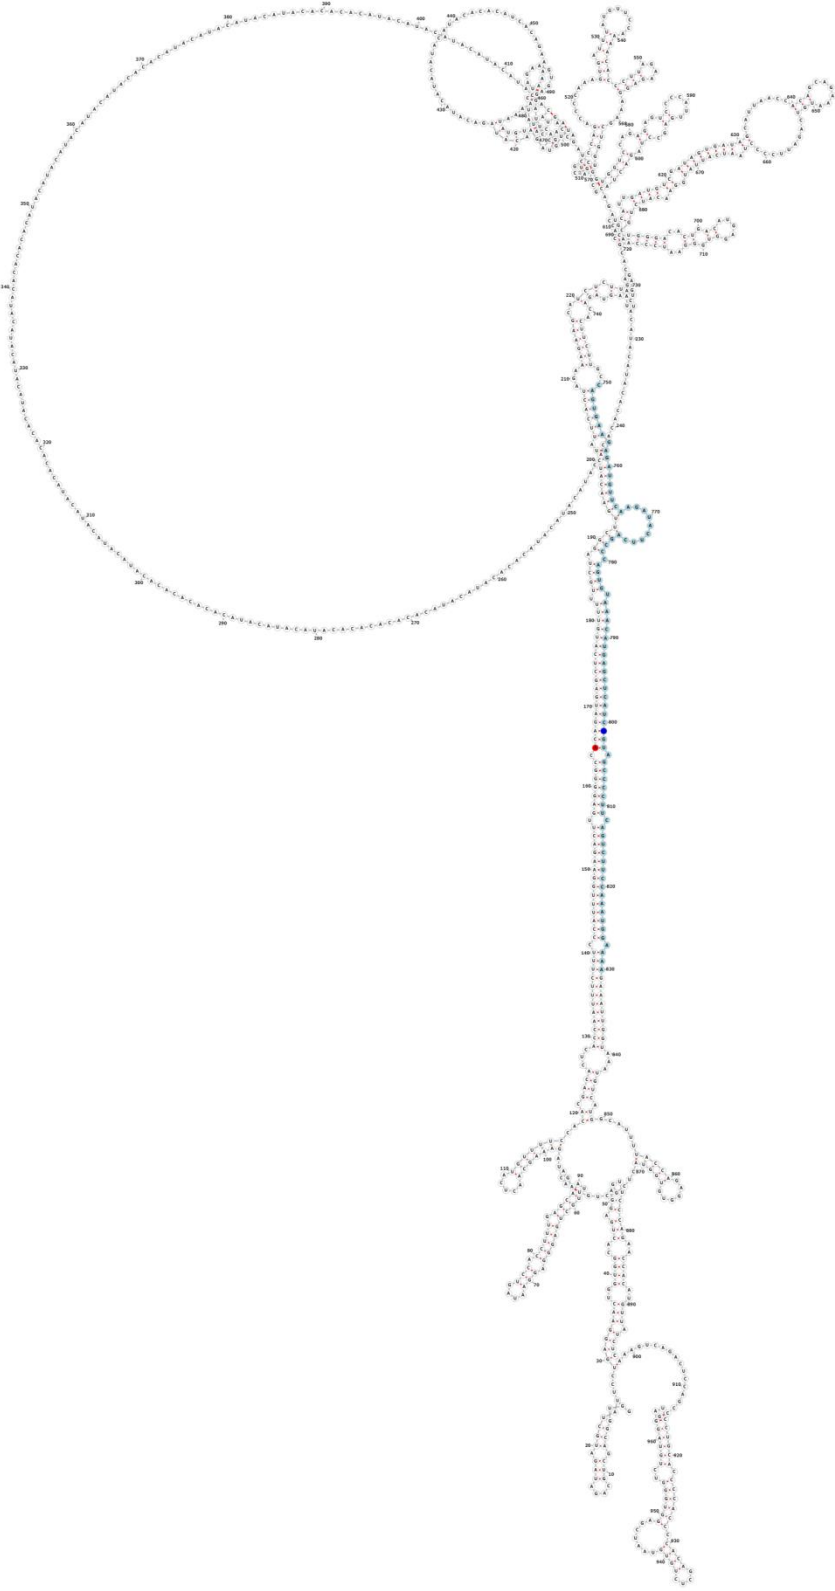

Transcript: *Tnp03*

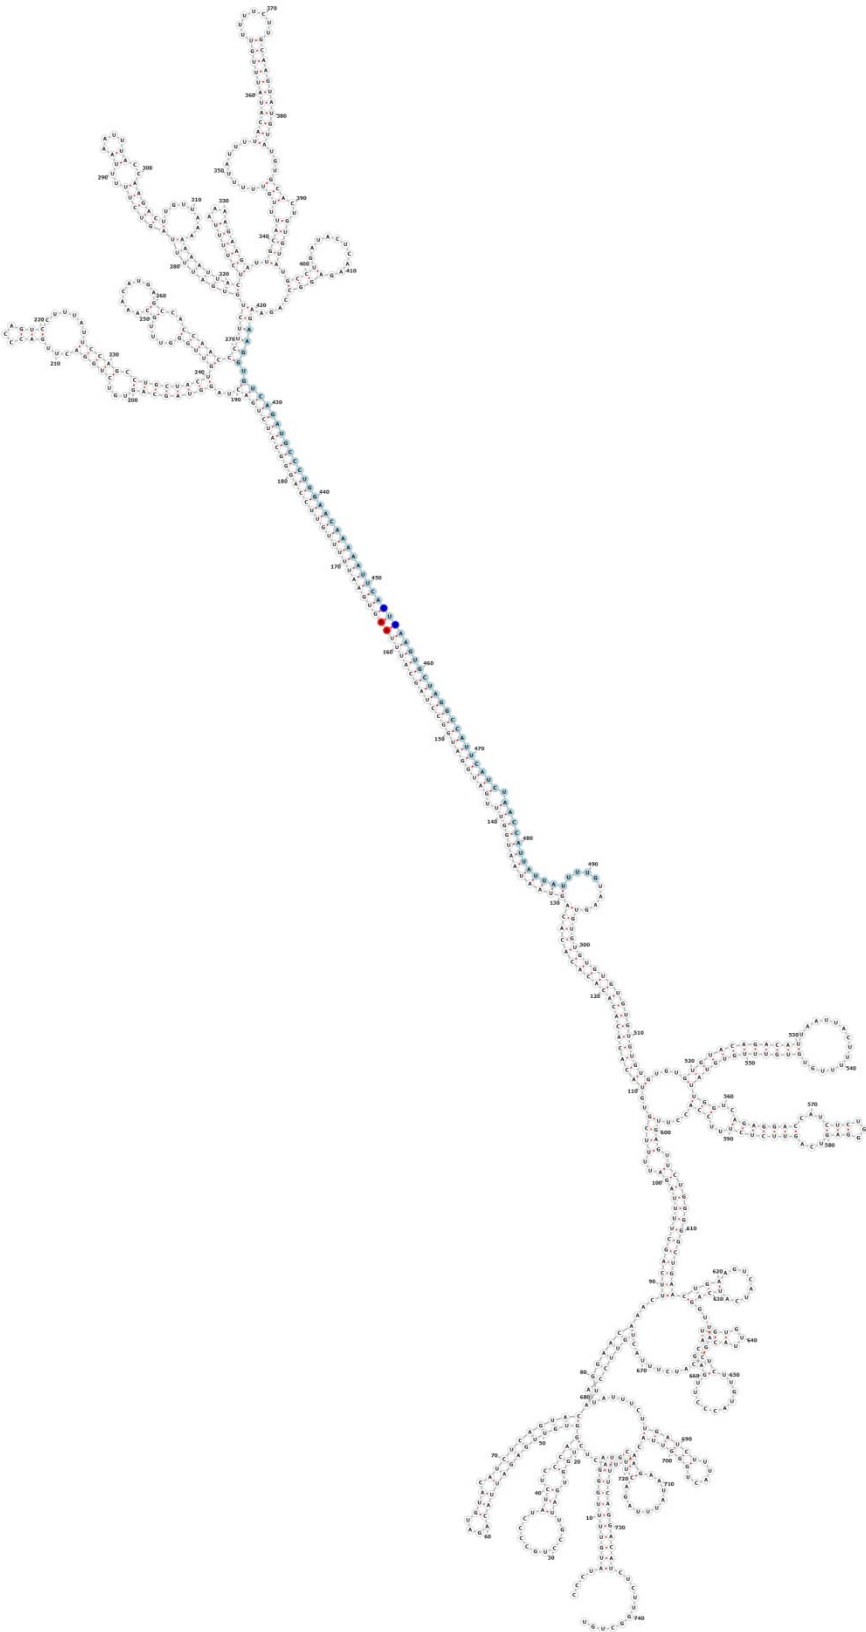

**Supplemental Dataset S2.** Structure predictions of all edited transcripts used in Figure 6 were no experimental evidence for the location of the editing complementary site (ECS) is available. The structure has been predicted using RNAfold and visualized using forna. The exonic sequence is highlighted in yellow. The edited adenosine is marked in red. The intronic sequence is not colored.

Transcript: *Best1*

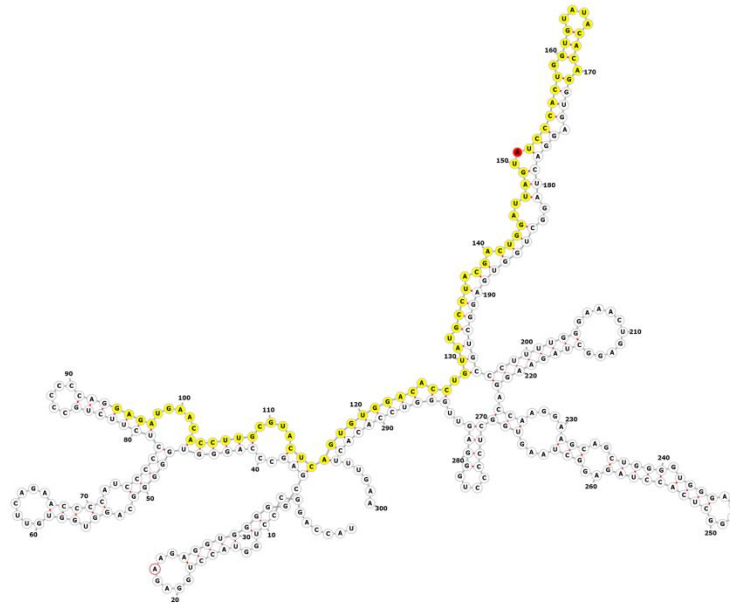

Transcript: *Cog3*

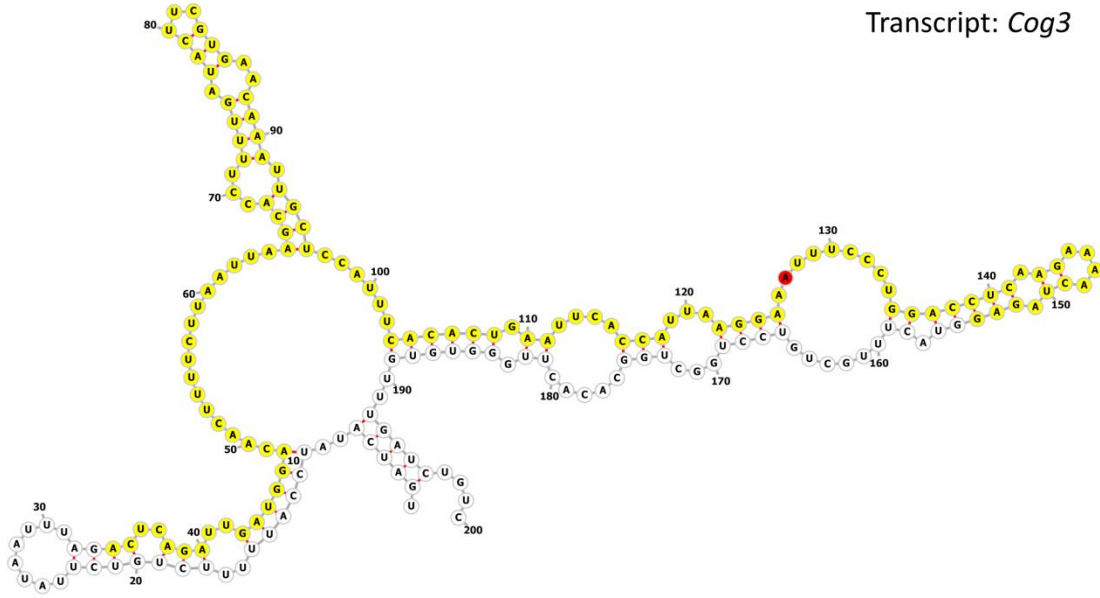

Transcript: *Copa*

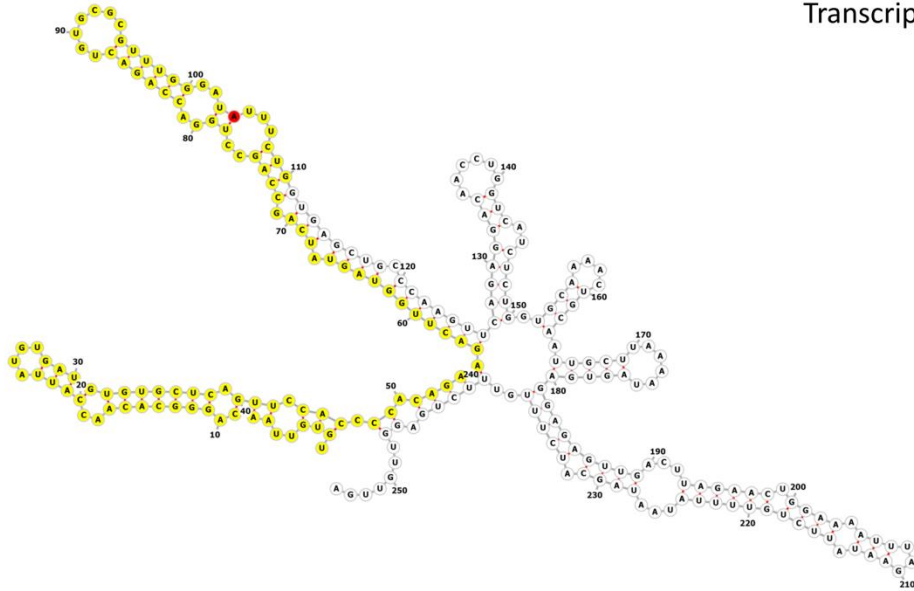

Transcript: *Tmem63b*

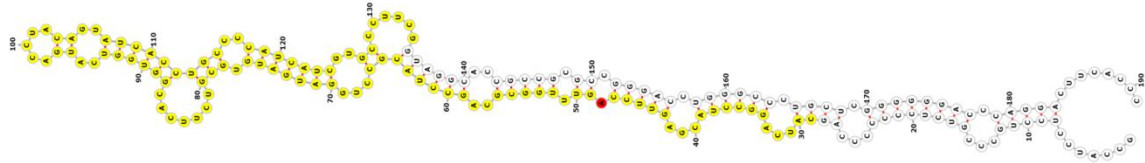

Transcript: *Azin1*

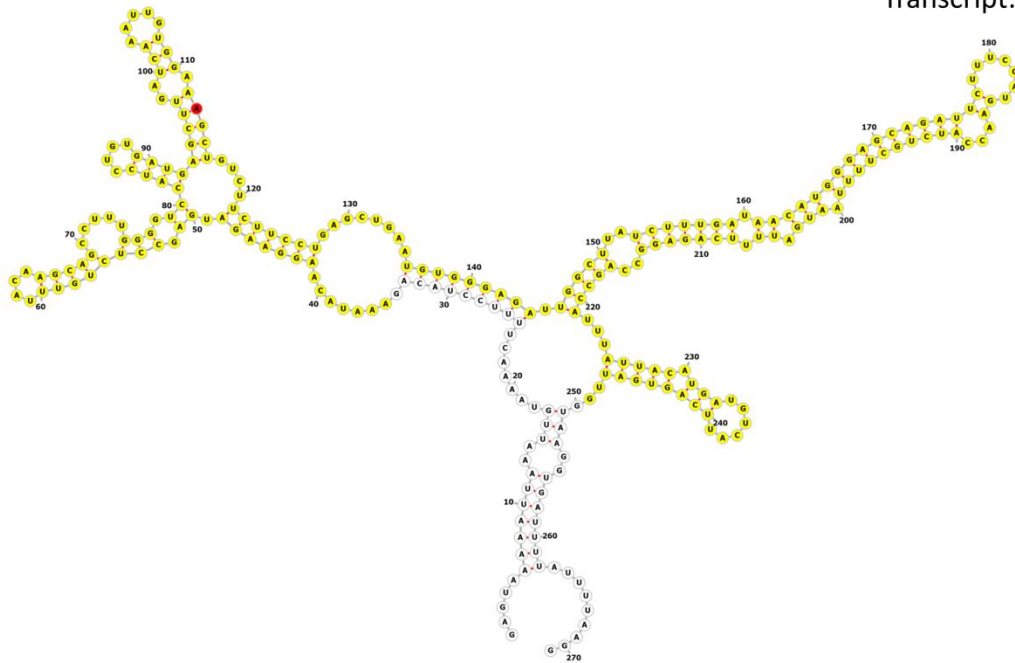

Transcript: *Blcap*

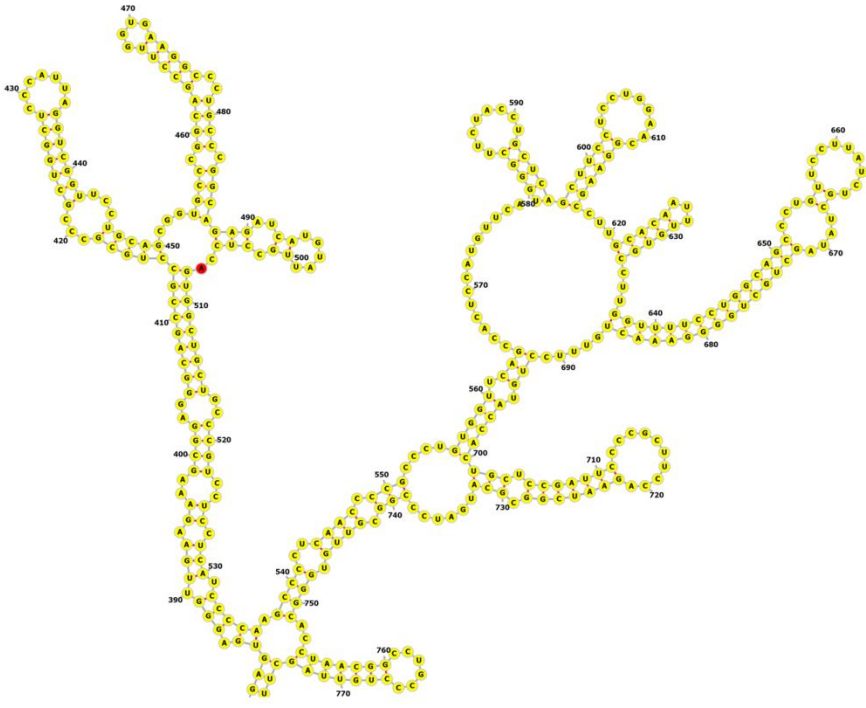

Transcript: *Cacna1d*

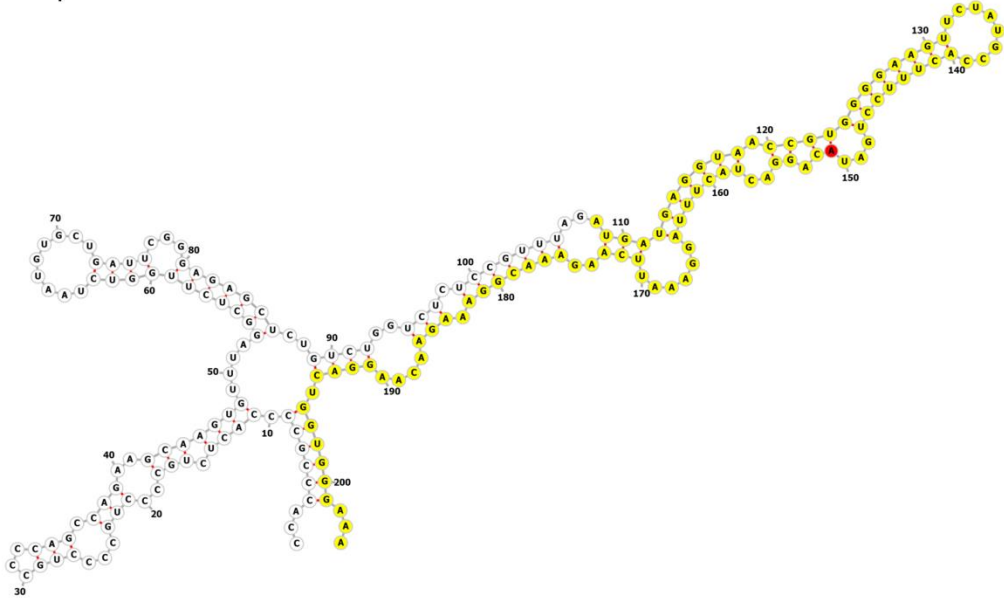

Transcript: *Cadps*

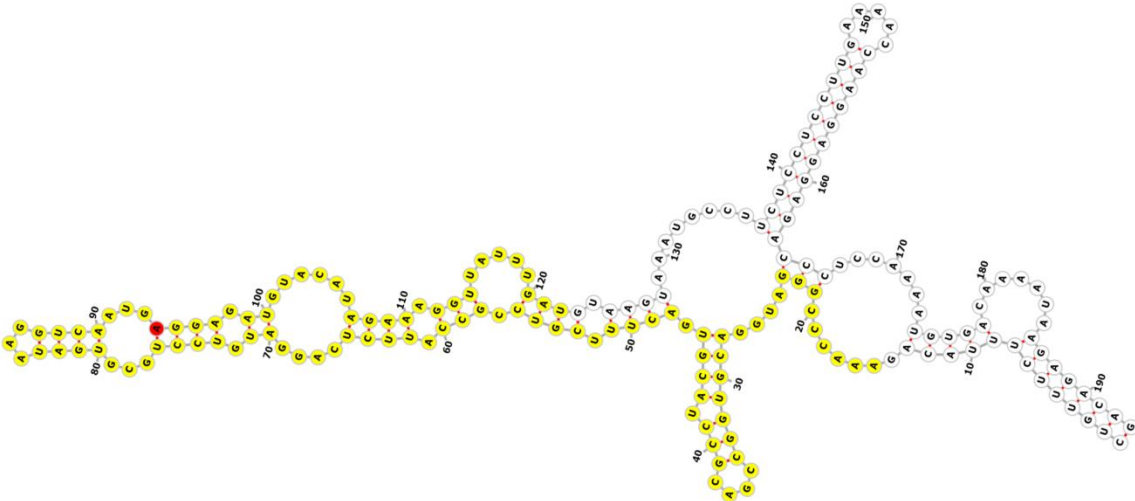

Transcript: *Cdk13*

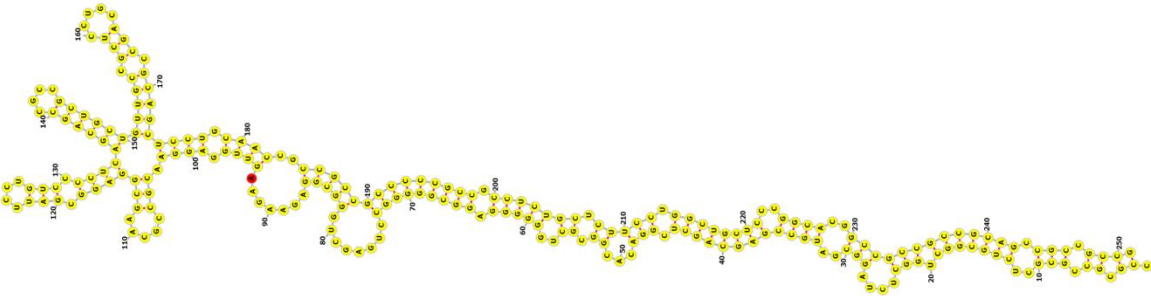



Transcript: *Dcaf16*

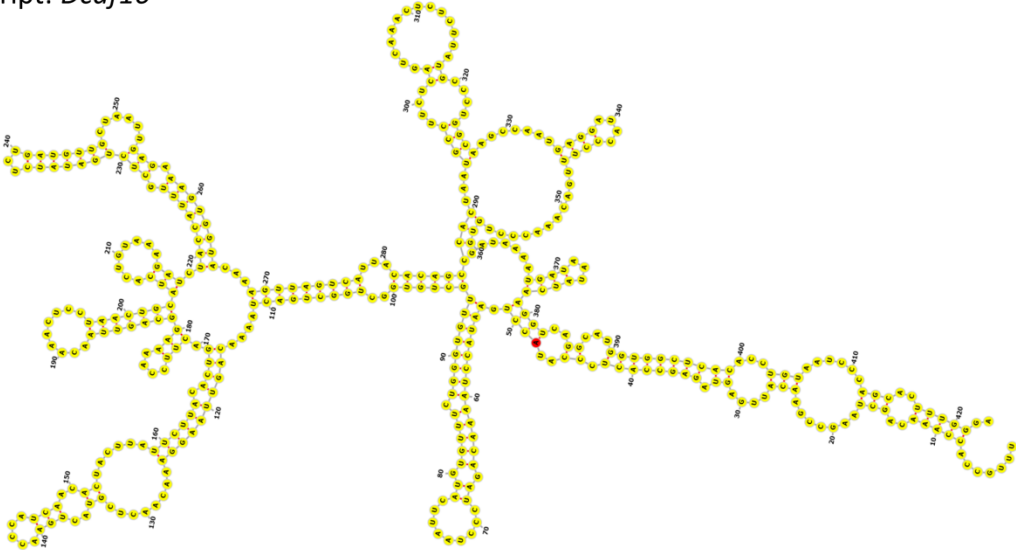

Transcript: *Elfn2*

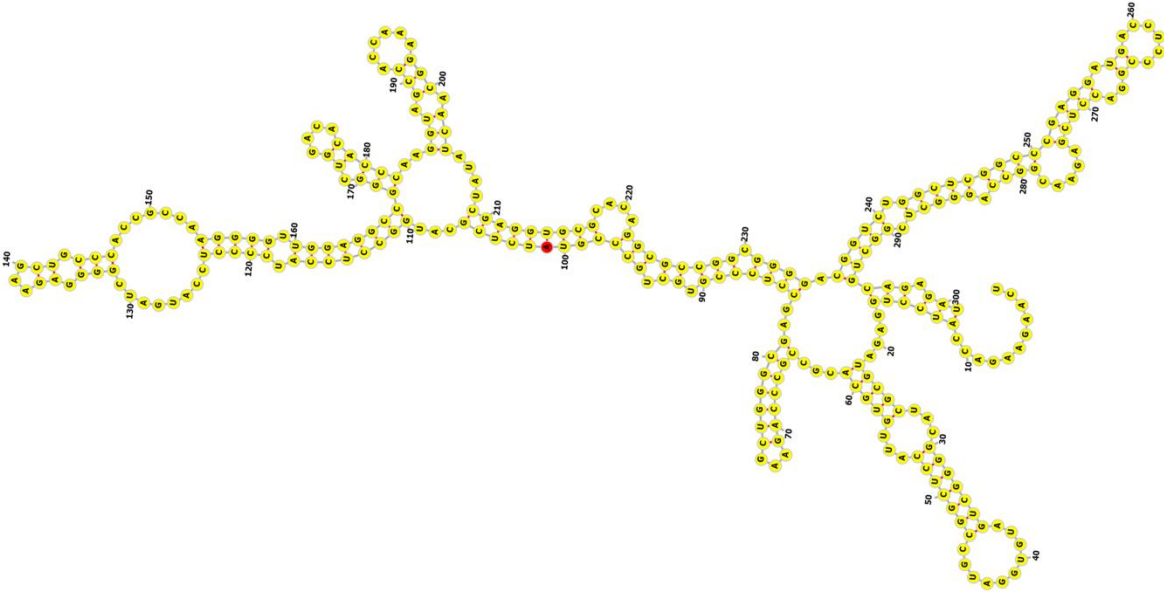

Transcript: *Gipc1*

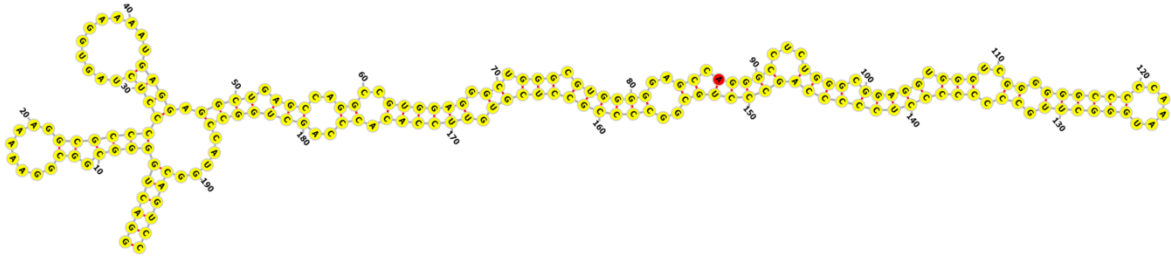

Transcript: *Grm4*

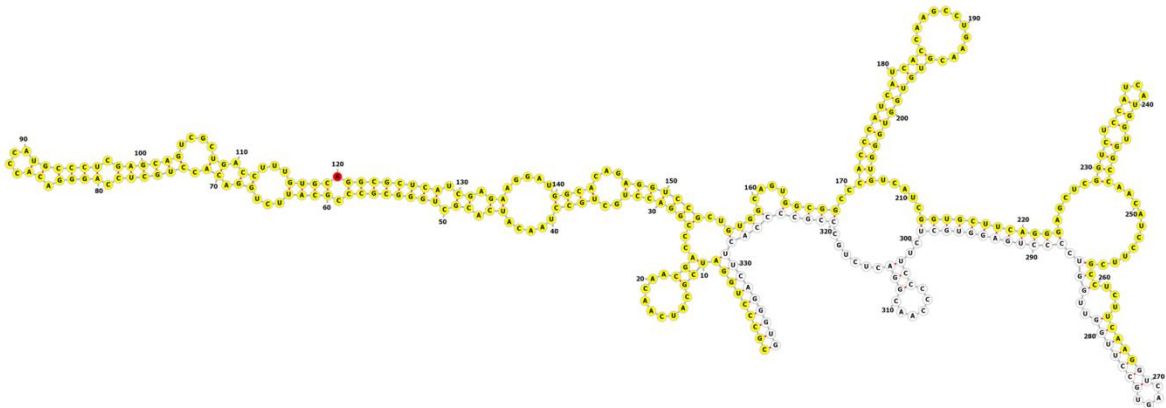

Transcript: *Igfbp7*

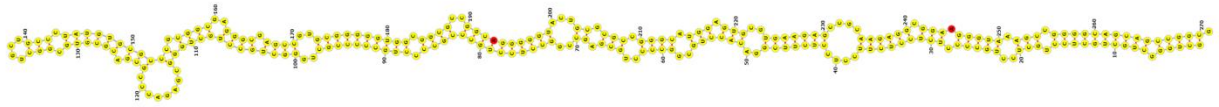

Transcript: *Kcna1*

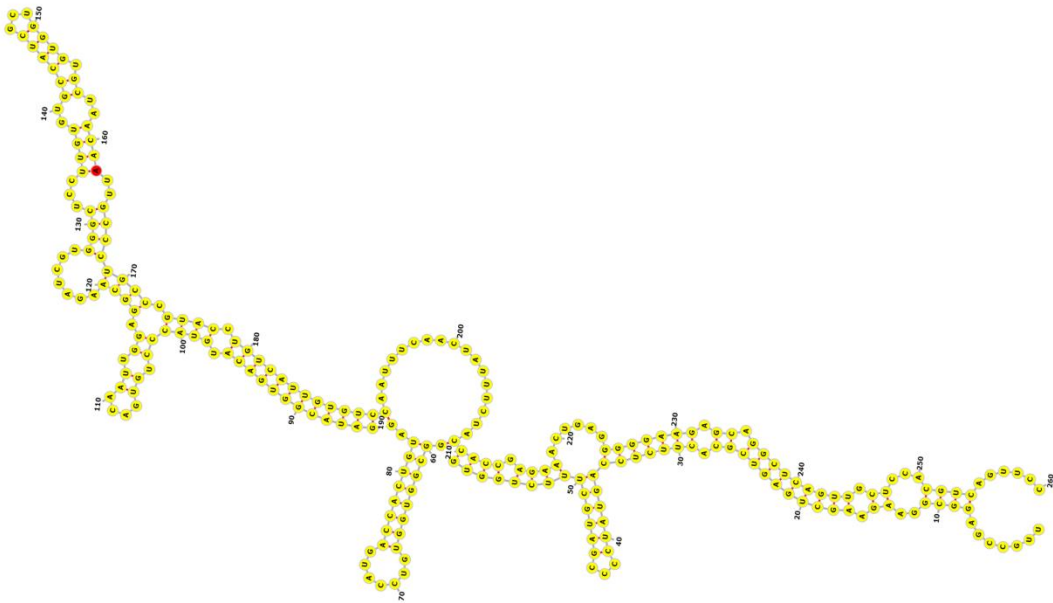

Transcript: *Kcnma1*

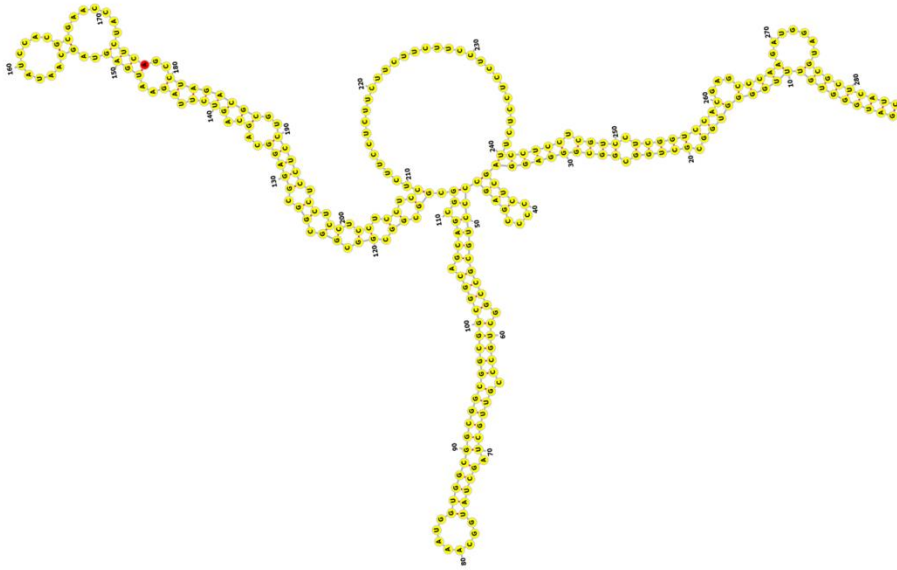

Transcript: *Mll4*

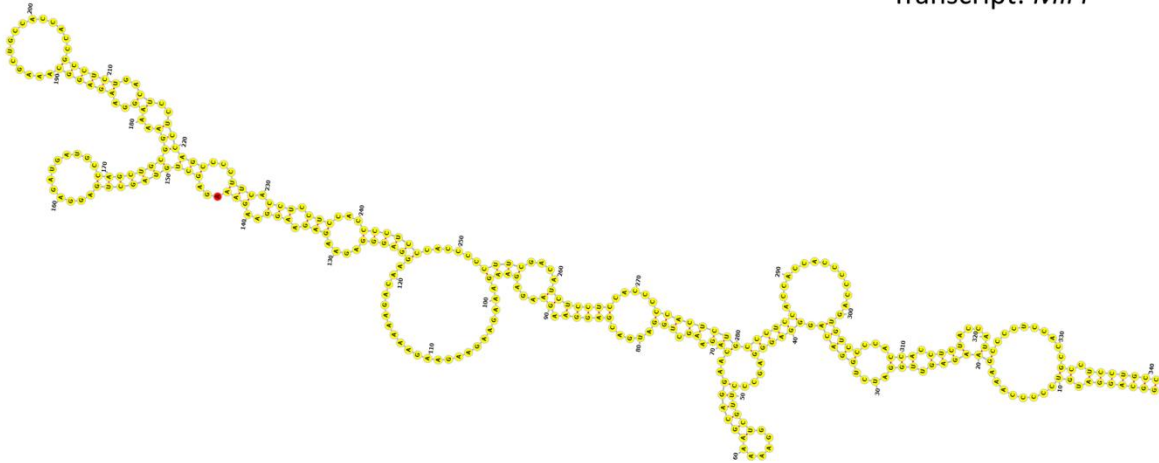

Transcript: *Myo19*

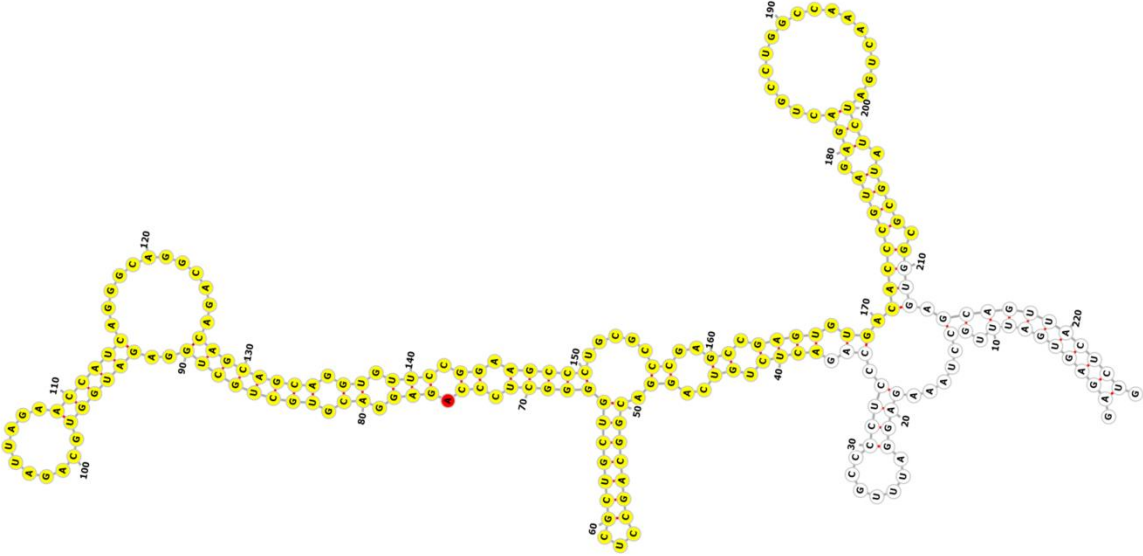

Transcript: *Nova1*

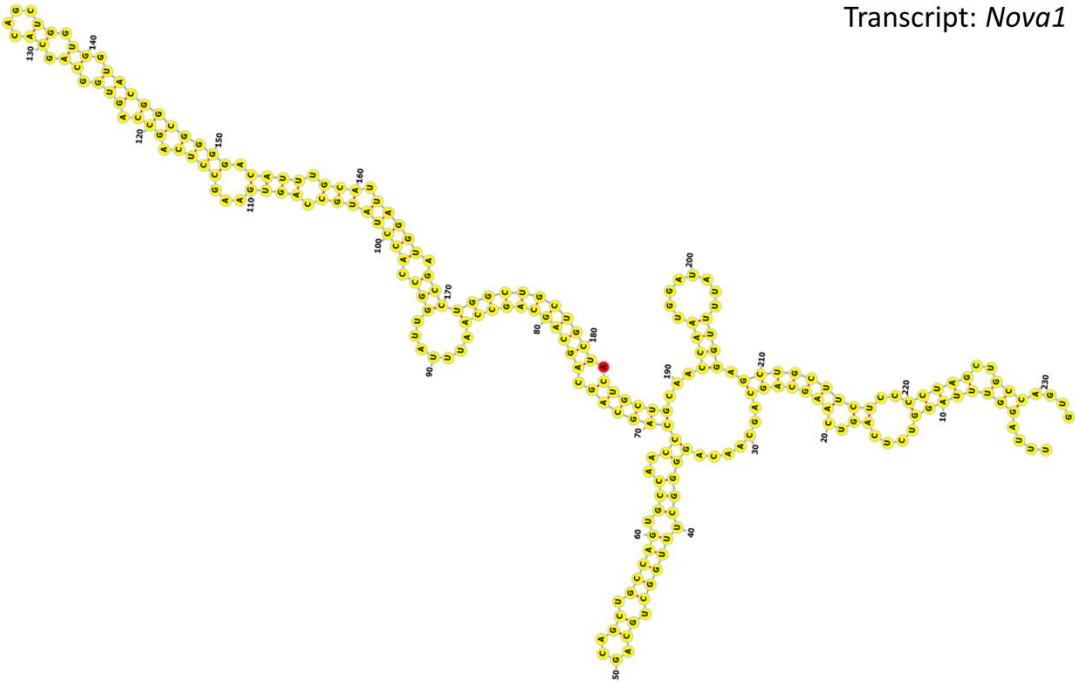

Transcript: *Osgep*

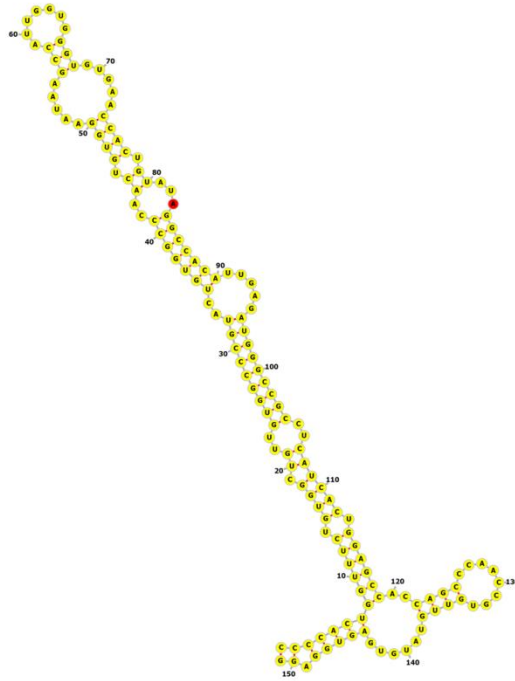

Transcript: *Pcd7*

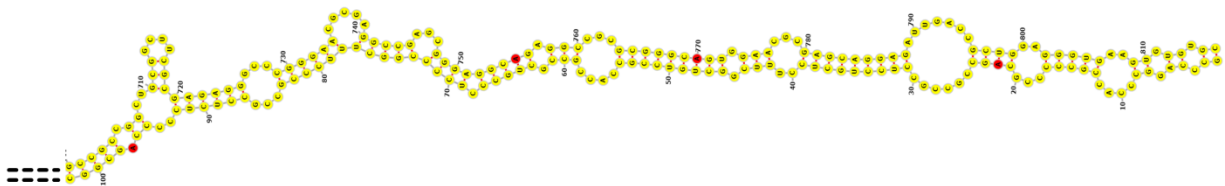

Transcript: *Plch2*

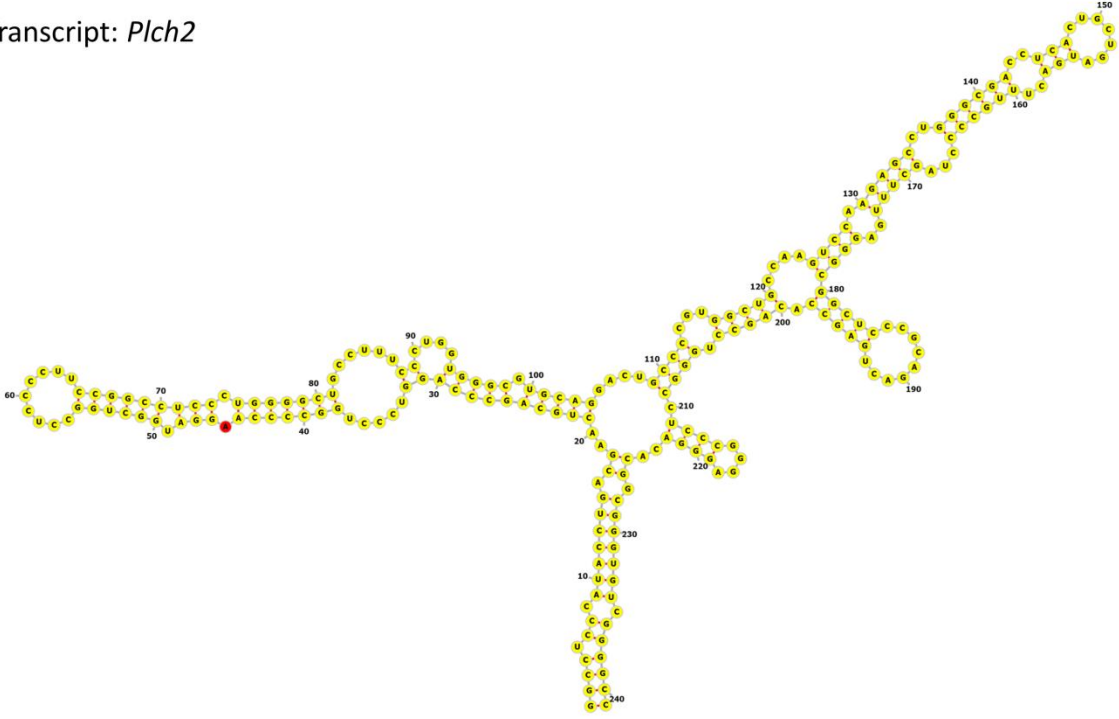

Transcript: *Sh3bp2*

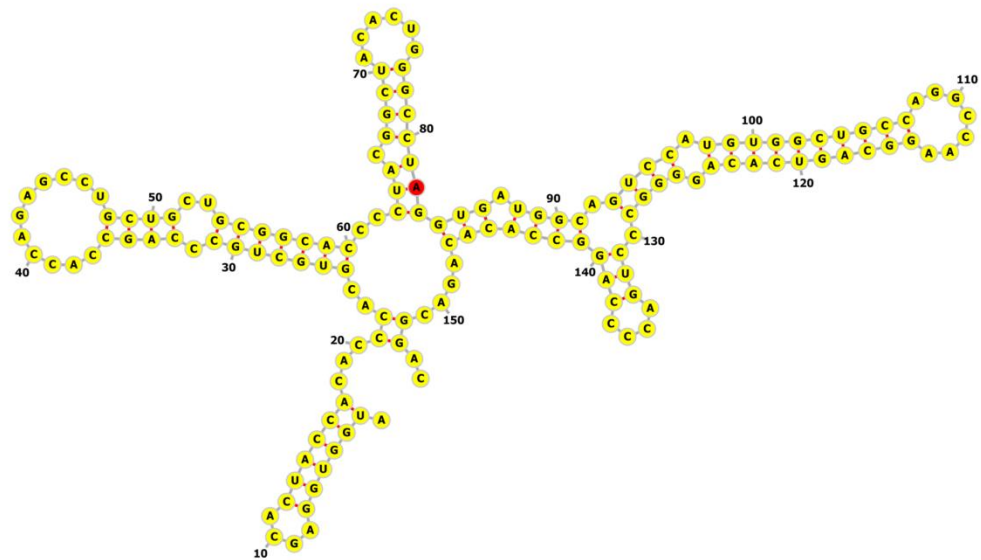

Transcript: *Son*

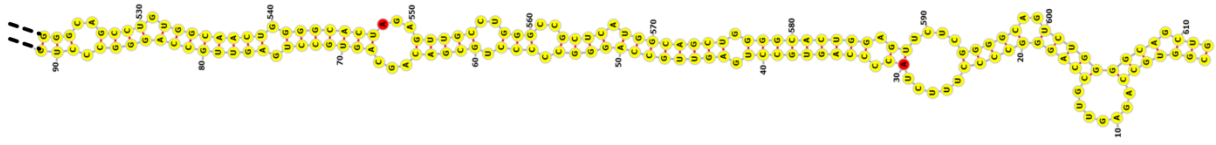

Transcript: *Son*

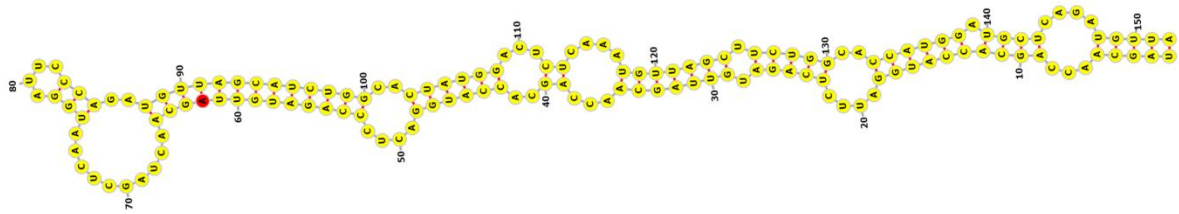



Transcript: *Tll3*

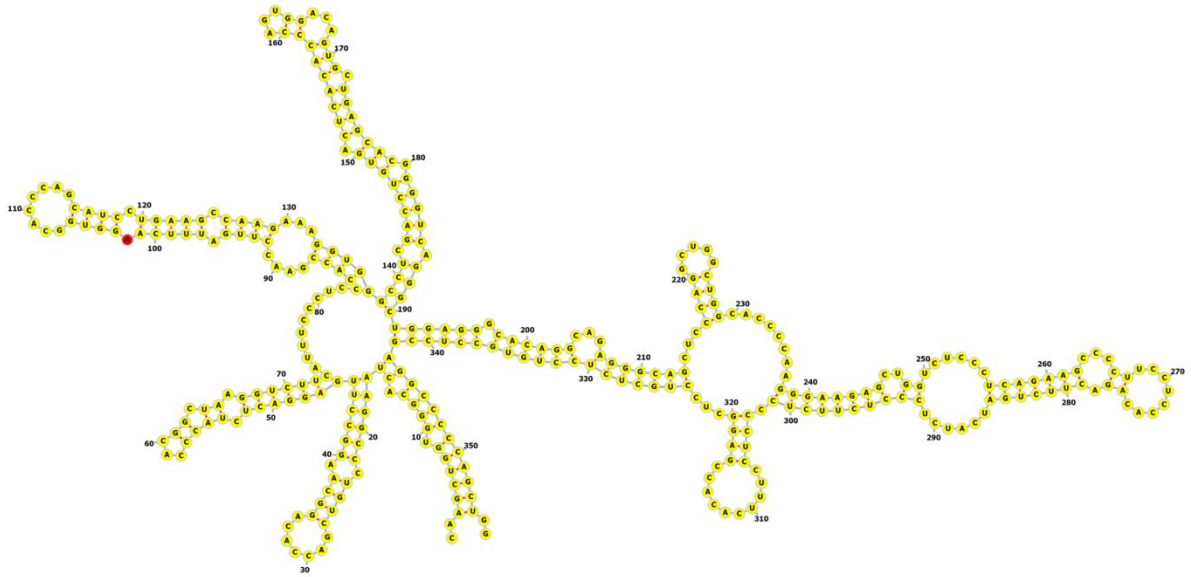

Transcript: *Unc80*

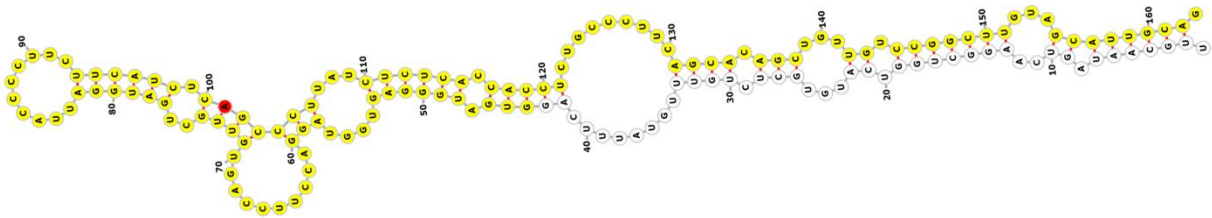

## Supplemental References

- Bhalla T, Rosenthal JJ, Holmgren M, Reenan R. 2004. Control of human potassium channel inactivation by editing of a small mRNA hairpin. *Nat Struct Mol Biol* **11**(10): 950-956.
- Danecek P, Nellaker C, McIntyre RE, Buendia-Buendia JE, Bumpstead S, Ponting CP, Flint J, Durbin R, Keane TM, Adams DJ. 2012. High levels of RNA-editing site conservation amongst 15 laboratory mouse strains. *Genome Biol* **13**(4): 26.
- Gommans WM, Tatalias NE, Sie CP, Dupuis D, Vendetti N, Smith L, Kaushal R, Maas S. 2008. Screening of human SNP database identifies recoding sites of A-to-I RNA editing. *RNA* **14**(10): 2074-2085.
- Herb A, Higuchi M, Sprengel R, Seeburg PH. 1996. Q/R site editing in kainate receptor GluR5 and GluR6 pre-mRNAs requires distant intronic sequences. *Proceedings of the National Academy of Sciences of the United States of America* **93**(5): 1875-1880.
- Higuchi M, Single FN, Kohler M, Sommer B, Sprengel R, Seeburg PH. 1993. Rna Editing of Ampa Receptor Subunit Glur-B - a Base-Paired Intron-Exon Structure Determines Position and Efficiency. *Cell* **75**(7): 1361-1370.
- Huntley MA, Lou M, Goldstein LD, Lawrence M, Dijkgraaf GJ, Kaminker JS, Gentleman R. 2016. Complex regulation of ADAR-mediated RNA-editing across tissues. *BMC Genomics* **17**: 61.
- Irimia M, Denuc A, Ferran JL, Pernaute B, Puellas L, Roy SW, Garcia-Fernandez J, Marfany G. 2012. Evolutionarily conserved A-to-I editing increases protein stability of the alternative splicing factor Nova1. *RNA Biology* **9**(1): 12-21.
- Jain M, Mann TD, Stulic M, Rao SP, Kirsch A, Pullirsch D, Strobl X, Rath C, Reissig L, Moreth K et al. 2018. RNA editing of Filamin A pre-mRNA regulates vascular contraction and diastolic blood pressure. *The EMBO journal*.
- Kerpedjiev P, Hammer S, Hofacker IL. 2015. Forna (force-directed RNA): Simple and effective online RNA secondary structure diagrams. *Bioinformatics* **31**(20): 3377-3379.
- Liddicoat BJ, Hartner JC, Piskol R, Ramaswami G, Chalk AM, Kingsley PD, Sankaran VG, Wall M, Purton LE, Seeburg PH et al. 2016. Adenosine-to-inosine RNA editing by ADAR1 is essential for normal murine erythropoiesis. *Experimental hematology* **44**(10): 947-963.
- Lomeli H, Mosbacher J, Melcher T, Hoyer T, Geiger JR, Kuner T, Monyer H, Higuchi M, Bach A, Seeburg PH. 1994. Control of kinetic properties of AMPA receptor channels by nuclear RNA editing. *Science* **266**(5191): 1709-1713.
- Lorenz R, Bernhart SH, Honer Zu Siederdisen C, Tafer H, Flamm C, Stadler PF, Hofacker IL. 2011. ViennaRNA Package 2.0. *Algorithms for molecular biology : AMB* **6**: 26.
- Maas S, Godfried Sie CP, Stoev I, Dupuis DE, Latona J, Porman AM, Evans B, Rekawek P, Kluempers V, Mutter M et al. 2011. Genome-wide evaluation and discovery of vertebrate A-to-I RNA editing sites. *Biochemical and biophysical research communications* **412**(3): 407-412.
- Ohlson J, Pedersen JS, Haussler D, Ohman M. 2007. Editing modifies the GABA(A) receptor subunit alpha 3. *RNA* **13**(5): 698-703.
- Srivastava PK, Bagnati M, Delahaye-Duriez A, Ko JH, Rotival M, Langley SR, Shkura K, Mazzuferi M, Danis B, van Eyll J et al. 2017. Genome-wide analysis of differential RNA editing in epilepsy. *Genome research* **27**(3): 440-450.
- Yeo J, Goodman RA, Schirle NT, David SS, Beal PA. 2010. RNA editing changes the lesion specificity for the DNA repair enzyme NEIL1. *Proceedings of the National Academy of Sciences of the United States of America* **107**(48): 20715-20719.
