# Supplementary material for: A high resolution A-to-I editing map in the mouse identifies editing events controlled by pre-mRNA splicing
Source: Genome Res. 2019 Sep;29(9):1453–63. doi: 10.1101/gr.242636.118 (PMC6724681; doi:10.1101/gr.242636.118)
Supplement: Supplemental Material [file supp_gr.242636.118_Supplemental_Table_S3.xlsx]

## Sheet: All Nascent-seq editing sites
chromosome	position	strand	referenceBase	id	gene_name(s)	repeatType	genome_annotation	VEP_annotation	radar	darned	ECS_position	ECS_distance	ECS_orientation	ECS_annotation	ES_edited_by	cumulativeEditingLevelWT	editedReadCountWT.rep1	totalReadCountWT.rep1	editingLevelWT.rep1	editedReadCountWT.rep2	totalReadCountWT.rep2	editingLevelWT.rep2	editedReadCountWT.rep3	totalReadCountWT.rep3	editingLevelWT.rep3	cumulativeEditingLevelDKO	editedReadCountDKO.rep1	totalReadCountDKO.rep1	editingLevelDKO.rep1	editedReadCountDKO.rep2	totalReadCountDKO.rep2	editingLevelDKO.rep2	editedReadCountDKO.rep3	totalReadCountDKO.rep3	editingLevelDKO.rep3	cumulativeEditingLevel_dAdarb1	editedReadCount_dAdarb1.rep1	totalReadCount_dAdarb1.rep1	editingLevel_dAdarb1.rep1	editedReadCount_dAdarb1.rep2	totalReadCount_dAdarb1.rep2	editingLevel_dAdarb1.rep2	editedReadCount_dAdarb1.rep3	totalReadCount_dAdarb1.rep3	editingLevel_dAdarb1.rep3
chr1	100104784	+	A	chr1:100104784	Cntnap5b	LTR	Intron	intron_variant	0	0	-	-	-	-	ADAR	0.3	1	5	0.2	0	1	0	2	4	0.5	0	0	1	0	0	5	0	0	43	0	0.111111	1	4	0.25	0	4	0	0	1	0
chr1	100104796	+	A	chr1:100104796	Cntnap5b	LTR	Intron	intron_variant	0	0	100103639	1157	upstream	intronic	ADARB1	0.888889	3	3	1	1	1	1	4	5	0.8	0	0	1	0	0	5	0	0	43	0	0	0	3	0	0	3	0	0	1	0
chr1	100104806	+	A	chr1:100104806	Cntnap5b	LTR	Intron	intron_variant	0	0	100103629	1177	upstream	intronic	ADARB1	0.636364	2	5	0.4	1	1	1	4	5	0.8	0	0	0	NA	0	3	0	0	17	0	0	0	2	0	0	3	0	0	1	0
chr1	100295006	+	A	chr1:100295006	Cntnap5b	LTR	Intron	non_coding_transcript_variant	0	0	100296724	1718	downstream	Intron	ADAR	0.0967742	1	10	0.1	0	11	0	2	10	0.2	0	0	2	0	0	11	0	0	11	0	0.0526316	0	10	0	1	6	0.166667	0	3	0
chr1	100295010	+	A	chr1:100295010	Cntnap5b	LTR	Intron	non_coding_transcript_variant	0	0	-	-	-	-	ADAR	0.233333	4	11	0.363636	2	10	0.2	1	9	0.111111	0	0	2	0	0	9	0	0	11	0	0.0588235	1	9	0.111111	0	5	0	0	3	0
chr1	100295067	+	A	chr1:100295067	Cntnap5b	LTR	Intron	non_coding_transcript_variant	0	0	100296655	1588	downstream	intronic	ADARB1	0.1875	3	12	0.25	1	5	0.2	2	15	0.133333	0	0	2	0	0	15	0	0	51	0	0	0	4	0	0	5	0	0	1	0
chr1	100296697	+	A	chr1:100296697	Cntnap5b	LTR	Intron	non_coding_transcript_variant	0	0	100295034	1663	upstream	intronic	ADAR	0.266667	5	6	0.833333	3	14	0.214286	0	10	0	0	0	7	0	0	11	0	0	6	0	0.0625	1	3	0.333333	0	6	0	0	7	0
chr1	100296710	+	A	chr1:100296710	Cntnap5b	LTR	Intron	non_coding_transcript_variant	0	0	100295019	1691	upstream	Intron	ADARB1	0.241379	1	4	0.25	3	15	0.2	3	10	0.3	0	0	6	0	0	10	0	0	5	0	0	0	2	0	0	5	0	0	5	0
chr1	100296711	+	A	chr1:100296711	Cntnap5b	LTR	Intron	non_coding_transcript_variant	0	0	100295019	1692	upstream	Intron	ADAR	0.178571	3	4	0.75	1	15	0.0666667	1	9	0.111111	0	0	7	0	0	10	0	0	4	0	0.0833333	0	2	0	0	5	0	1	5	0.2
chr1	100296725	+	A	chr1:100296725	Cntnap5b	LTR	Intron	non_coding_transcript_variant	0	0	100295005	1720	upstream	intronic	ADAR	0.12	0	4	0	1	13	0.0769231	2	8	0.25	0	0	8	0	0	9	0	0	3	0	0.181818	0	2	0	0	4	0	2	5	0.4
chr1	10030968	-	T	chr1:10030968	Cops5	SINE	Intron	non_coding_transcript_exon_variant	0	0	-	-	-	-	ADARB1	0.117647	0	9	0	1	2	0.5	1	6	0.166667	0	0	12	0	0	12	0	0	12	0	0	0	6	0	0	7	0	0	7	0
chr1	10031028	-	T	chr1:10031028	Cops5	SINE	Intron	non_coding_transcript_exon_variant	0	0	-	-	-	-	ADAR	0.428571	9	23	0.391304	2	3	0.666667	4	9	0.444444	0	0	26	0	0	23	0	0	43	0	0.289474	6	14	0.428571	4	14	0.285714	1	10	0.1
chr1	10031549	-	T	chr1:10031549	Cops5	SINE	Intron	non_coding_transcript_exon_variant	1	1	10031547	2	downstream	intronic	ADARB1	0.0990991	4	36	0.111111	4	40	0.1	3	35	0.0857143	0	0	79	0	0	40	0	0	46	0	0	0	18	0	0	17	0	0	16	0
chr1	10031605	-	T	chr1:10031605	Cops5	SINE	Intron	non_coding_transcript_exon_variant	1	1	-	-	-	-	ADARB1	0.0447761	5	43	0.116279	1	49	0.0204082	0	42	0	0	0	101	0	0	53	0	0	49	0	0	0	25	0	0	18	0	0	22	0
chr1	100322450	+	A	chr1:100322450	Cntnap5b	LINE	Intron	non_coding_transcript_variant	0	0	-	-	-	-	ADARB1	0.09375	2	9	0.222222	1	8	0.125	0	15	0	0	0	8	0	0	10	0	0	2	0	0	0	6	0	0	2	0	0	1	0
chr1	10057360	+	A	chr1:10057360	1700047N06Rik,Cspp1	SINE	Exon	non_coding_transcript_exon_variant	0	0	-	-	-	-	ADARB1	0.28	3	4	0.75	1	12	0.0833333	3	9	0.333333	0	0	6	0	0	9	0	0	11	0	0	0	8	0	0	10	0	0	7	0
chr1	10079213	+	A	chr1:10079213	Cspp1	SINE	Intron	non_coding_transcript_variant	0	0	-	-	-	-	ADAR	0.108108	0	22	0	3	26	0.115385	5	26	0.192308	0	0	39	0	0	28	0	0	24	0	0.145455	0	9	0	4	22	0.181818	4	24	0.166667
chr1	10079233	+	A	chr1:10079233	Cspp1	SINE	Intron	non_coding_transcript_variant	0	0	-	-	-	-	ADAR	0.213333	1	21	0.047619	8	28	0.285714	7	26	0.269231	0	0	40	0	0	21	0	0	22	0	0.0877193	0	11	0	0	24	0	5	22	0.227273
chr1	10079257	+	A	chr1:10079257	Cspp1	SINE	Intron	non_coding_transcript_variant	0	0	10080257	1000	downstream	Intron	ADARB1	0.154762	1	27	0.037037	6	25	0.24	6	32	0.1875	0	0	41	0	0	20	0	0	24	0	0	0	5	0	0	17	0	0	23	0
chr1	10079292	+	A	chr1:10079292	Cspp1	SINE	Intron	non_coding_transcript_variant	0	0	10080224	932	downstream	intronic	ADARB1	0.0375	2	25	0.08	0	27	0	1	28	0.0357143	0	0	46	0	0	23	0	0	25	0	0	0	9	0	0	15	0	0	21	0
chr1	10097393	+	A	chr1:10097393	Cspp1	DNA	Intron	non_coding_transcript_variant	0	0	10098537	1144	downstream	intronic	ADAR	0.09375	3	26	0.115385	4	61	0.0655738	5	41	0.121951	0	0	32	0	0	32	0	0	24	0	0.0759494	1	33	0.030303	2	19	0.105263	3	27	0.111111
chr1	10097394	+	A	chr1:10097394	Cspp1	DNA	Intron	non_coding_transcript_variant	0	0	10098536	1142	downstream	intronic	ADAR	0.181102	3	25	0.12	9	61	0.147541	11	41	0.268293	0	0	32	0	0	32	0	0	24	0	0.0864198	2	34	0.0588235	2	19	0.105263	3	28	0.107143
chr1	10097396	+	A	chr1:10097396	Cspp1	DNA	Intron	non_coding_transcript_variant	0	0	10098534	1138	downstream	intronic	ADARB1	0.136	2	25	0.08	7	59	0.118644	8	41	0.195122	0	0	35	0	0	32	0	0	24	0	0	0	34	0	0	21	0	0	33	0
chr1	10097410	+	A	chr1:10097410	Cspp1	DNA	Intron	non_coding_transcript_variant	0	0	10098521	1111	downstream	intronic	ADAR	0.569106	12	25	0.48	36	59	0.610169	22	39	0.564103	0	0	32	0	0	34	0	0	25	0	0.0188679	1	42	0.0238095	0	26	0	1	38	0.0263158
chr1	10098178	+	A	chr1:10098178	Cspp1	.	Intron	non_coding_transcript_variant	0	0	-	-	-	-	ADARB1	0.0813008	2	38	0.0526316	1	30	0.0333333	7	55	0.127273	0	0	51	0	0	59	0	0	30	0	0	0	26	0	0	20	0	0	22	0
chr1	10098444	+	A	chr1:10098444	Cspp1	DNA	Intron	non_coding_transcript_variant	0	0	-	-	-	-	ADAR	0.275676	12	56	0.214286	22	63	0.349206	17	66	0.257576	0	0	43	0	0	27	0	0	42	0	0.0704225	1	56	0.0178571	6	39	0.153846	3	47	0.0638298
chr1	10098501	+	A	chr1:10098501	Cspp1	DNA	Intron	non_coding_transcript_variant	0	0	-	-	-	-	ADAR	0.291429	18	49	0.367347	20	63	0.31746	13	63	0.206349	0	0	47	0	0	31	0	0	44	0	0.0420168	1	44	0.0227273	4	39	0.102564	0	36	0
chr1	10098505	+	A	chr1:10098505	Cspp1	DNA	Intron	non_coding_transcript_variant	0	0	-	-	-	-	ADAR	0.0402299	2	48	0.0416667	2	62	0.0322581	3	64	0.046875	0	0	47	0	0	33	0	0	47	0	0.0252101	0	44	0	2	38	0.0526316	1	37	0.027027
chr1	10098506	+	A	chr1:10098506	Cspp1	DNA	Intron	non_coding_transcript_variant	0	0	-	-	-	-	ADARB1	0.0470588	1	47	0.0212766	5	59	0.0847458	2	64	0.03125	0	0	46	0	0	34	0	0	47	0	0	0	44	0	0	37	0	0	37	0
chr1	10098507	+	A	chr1:10098507	Cspp1	DNA	Intron	non_coding_transcript_variant	0	0	-	-	-	-	ADAR	0.0994152	4	47	0.0851064	8	60	0.133333	5	64	0.078125	0	0	47	0	0	34	0	0	47	0	0.0165289	0	45	0	2	38	0.0526316	0	38	0
chr1	10098523	+	A	chr1:10098523	Cspp1	DNA	Intron	non_coding_transcript_variant	0	0	-	-	-	-	ADAR	0.232704	11	48	0.229167	13	53	0.245283	13	58	0.224138	0	0	44	0	0	41	0	0	48	0	0.0186916	0	43	0	0	31	0	2	33	0.0606061
chr1	10098531	+	A	chr1:10098531	Cspp1	DNA	Intron	non_coding_transcript_variant	0	0	10097400	1131	upstream	intronic	ADAR	0.12963	4	48	0.0833333	10	55	0.181818	7	59	0.118644	0	0	45	0	0	41	0	0	47	0	0.00970874	1	40	0.025	0	32	0	0	31	0
chr1	10098533	+	A	chr1:10098533	Cspp1	DNA	Intron	non_coding_transcript_variant	0	0	10097398	1135	upstream	intronic	ADAR	0.246753	11	47	0.234043	16	52	0.307692	11	55	0.2	0	0	43	0	0	39	0	0	45	0	0.00980392	0	41	0	1	31	0.0322581	0	30	0
chr1	10098535	+	A	chr1:10098535	Cspp1	DNA	Intron	non_coding_transcript_variant	0	0	10097396	1139	upstream	intronic	ADAR	0.281046	13	48	0.270833	17	52	0.326923	13	53	0.245283	0	0	43	0	0	35	0	0	44	0	0.03	1	41	0.0243902	2	30	0.0666667	0	29	0
chr1	10098536	+	A	chr1:10098536	Cspp1	DNA	Intron	non_coding_transcript_variant	0	0	10097396	1140	upstream	intronic	ADAR	0.601307	23	47	0.489362	37	53	0.698113	32	53	0.603774	0	0	42	0	0	38	0	0	46	0	0.040404	0	41	0	3	29	0.103448	1	29	0.0344828
chr1	10098541	+	A	chr1:10098541	Cspp1	DNA	Intron	non_coding_transcript_variant	0	0	10097389	1152	upstream	intronic	ADAR	0.374194	13	49	0.265306	22	55	0.4	23	51	0.45098	0	0	43	0	0	36	0	0	45	0	0.027027	1	44	0.0227273	2	34	0.0588235	0	33	0
chr1	10105739	+	A	chr1:10105739	Cspp1	SINE	Intron	non_coding_transcript_variant	0	0	10107834	2095	downstream	intronic	ADARB1	0.115385	4	17	0.235294	0	15	0	2	20	0.1	0	0	13	0	0	4	0	0	8	0	0	0	4	0	0	3	0	0	12	0
chr1	10105754	+	A	chr1:10105754	Cspp1	SINE	Intron	non_coding_transcript_variant	0	0	10107819	2065	downstream	intronic	ADARB1	0.0769231	2	16	0.125	0	16	0	2	20	0.1	0	0	17	0	0	4	0	0	8	0	0	0	5	0	0	3	0	0	8	0
chr1	10106540	+	A	chr1:10106540	Cspp1	SINE	Intron	non_coding_transcript_variant	0	0	-	-	-	-	ADARB1	0.0636943	5	43	0.116279	3	58	0.0517241	2	56	0.0357143	0	0	45	0	0	44	0	0	46	0	0	0	15	0	0	11	0	0	13	0
chr1	10106569	+	A	chr1:10106569	Cspp1	SINE	Intron	non_coding_transcript_variant	0	0	10105755	814	upstream	intronic	ADARB1	0.0609756	2	46	0.0434783	5	63	0.0793651	3	55	0.0545455	0	0	44	0	0	56	0	0	43	0	0	0	9	0	0	7	0	0	10	0
chr1	10106588	+	A	chr1:10106588	Cspp1	SINE	Intron	non_coding_transcript_variant	0	0	10105763	825	upstream	intronic	ADARB1	0.0429448	2	44	0.0454545	2	61	0.0327869	3	58	0.0517241	0	0	49	0	0	61	0	0	44	0	0	0	8	0	0	6	0	0	5	0
chr1	10107328	+	A	chr1:10107328	Cspp1	SINE	Intron	non_coding_transcript_variant	0	0	-	-	-	-	ADARB1	0.0396825	6	97	0.0618557	1	82	0.0121951	3	73	0.0410959	0	0	82	0	0	56	0	0	47	0	0	0	60	0	0	26	0	0	40	0
chr1	10107344	+	A	chr1:10107344	Cspp1	SINE	Intron	non_coding_transcript_variant	0	0	-	-	-	-	ADARB1	0.0401786	4	84	0.047619	1	77	0.012987	4	63	0.0634921	0	0	70	0	0	51	0	0	44	0	0	0	57	0	0	25	0	0	36	0
chr1	10124500	+	A	chr1:10124500	Cspp1	SINE	Intron	NMD_transcript_variant	0	0	10125906	1406	downstream	intronic	ADARB1	0.5	2	4	0.5	2	4	0.5	4	8	0.5	0	0	2	0	0	1	0	0	0	NA	0	0	4	0	0	0	NA	0	2	0
chr1	10125265	+	A	chr1:10125265	Cspp1	SINE	Intron	NMD_transcript_variant	0	0	-	-	-	-	ADAR	0.24	4	17	0.235294	0	2	0	2	6	0.333333	0	0	2	0	0	2	0	0	4	0	0.459459	5	11	0.454545	8	20	0.4	4	6	0.666667
chr1	10168662	-	T	chr1:10168662	Arfgef1,Gm26348	SINE	Intron	intron_variant	0	0	-	-	-	-	ADAR	0.0531915	1	27	0.037037	2	23	0.0869565	2	44	0.0454545	0	0	58	0	0	48	0	0	37	0	0.0133333	1	30	0.0333333	0	17	0	0	28	0
chr1	10168771	-	T	chr1:10168771	Arfgef1,Gm26348	SINE	Intron	intron_variant	0	0	-	-	-	-	ADAR	0.0454545	1	11	0.0909091	2	25	0.08	0	30	0	0	0	37	0	0	37	0	0	34	0	0.0188679	0	14	0	1	17	0.0588235	0	22	0
chr1	10200689	-	T	chr1:10200689	Arfgef1,Gm37569	.	Intron	intron_variant	0	0	10202316	1627	upstream	intronic	ADAR	0.413793	8	18	0.444444	10	19	0.526316	6	21	0.285714	0	0	21	0	0	21	0	0	11	0	0.285714	4	24	0.166667	3	5	0.6	3	6	0.5
chr1	10200708	-	T	chr1:10200708	Arfgef1,Gm37569	.	Intron	intron_variant	0	0	10202297	1589	upstream	intronic	ADAR	0.138462	1	18	0.0555556	3	23	0.130435	5	24	0.208333	0	0	22	0	0	22	0	0	13	0	0.204545	3	25	0.12	1	6	0.166667	5	13	0.384615
chr1	10202293	-	T	chr1:10202293	Arfgef1,Gm37569	.	Intron	intron_variant	0	0	10200713	1580	downstream	intronic	ADARB1	0.119403	1	18	0.0555556	2	25	0.08	5	24	0.208333	0	0	42	0	0	42	0	0	26	0	0	0	16	0	0	21	0	0	14	0
chr1	10202307	-	T	chr1:10202307	Arfgef1,Gm37569	.	Intron	intron_variant	0	0	10200698	1609	downstream	intronic	ADAR	0.338235	6	19	0.315789	8	26	0.307692	9	23	0.391304	0	0	47	0	0	43	0	0	30	0	0.0645161	0	19	0	3	27	0.111111	1	16	0.0625
chr1	10202308	-	T	chr1:10202308	Arfgef1,Gm37569	.	Intron	intron_variant	0	0	10200697	1611	downstream	intronic	ADAR	0.130435	4	19	0.210526	0	26	0	5	24	0.208333	0	0	47	0	0	43	0	0	31	0	0.0806452	1	19	0.0526316	4	27	0.148148	0	16	0
chr1	10202309	-	T	chr1:10202309	Arfgef1,Gm37569	.	Intron	intron_variant	0	0	10200696	1613	downstream	intronic	ADAR	0.144928	6	18	0.333333	3	27	0.111111	1	24	0.0416667	0	0	47	0	0	44	0	0	30	0	0.0491803	0	20	0	1	26	0.0384615	2	15	0.133333
chr1	10202310	-	T	chr1:10202310	Arfgef1,Gm37569	.	Intron	intron_variant	0	0	10200695	1615	downstream	intronic	ADARB1	0.0869565	0	19	0	2	26	0.0769231	4	24	0.166667	0	0	47	0	0	46	0	0	33	0	0	0	20	0	0	27	0	0	15	0
chr1	10202317	-	T	chr1:10202317	Arfgef1,Gm37569	.	Intron	intron_variant	0	0	10200688	1629	downstream	intronic	ADAR	0.102941	2	18	0.111111	3	25	0.12	2	25	0.08	0	0	45	0	0	45	0	0	32	0	0.135593	2	20	0.1	4	25	0.16	2	14	0.142857
chr1	10202318	-	T	chr1:10202318	Arfgef1,Gm37569	.	Intron	intron_variant	0	0	10200687	1631	downstream	intronic	ADARB1	0.102941	1	17	0.0588235	2	24	0.0833333	4	27	0.148148	0	0	46	0	0	45	0	0	32	0	0	0	20	0	0	25	0	0	14	0
chr1	10232796	-	T	chr1:10232796	Arfgef1	.	intergenic	regulatory_region_variant	0	0	-	-	-	-	ADAR	0.0253165	0	68	0	2	120	0.0166667	6	128	0.046875	0	0	227	0	0	154	0	0	136	0	0.0357143	0	8	0	1	10	0.1	0	10	0
chr1	104781687	+	A	chr1:104781687	Cdh20,Gm38031	.	Intron	intron_variant	0	0	104782827	1140	downstream	intronic	ADAR	0.119048	1	13	0.0769231	1	10	0.1	3	19	0.157895	0	0	8	0	0	21	0	0	8	0	0.166667	2	16	0.125	2	12	0.166667	2	8	0.25
chr1	104781688	+	A	chr1:104781688	Cdh20,Gm38031	.	Intron	intron_variant	0	0	104782824	1136	downstream	intronic	ADAR	0.214286	2	13	0.153846	1	10	0.1	6	19	0.315789	0	0	7	0	0	20	0	0	5	0	0.09375	0	13	0	1	11	0.0909091	2	8	0.25
chr1	104781732	+	A	chr1:104781732	Cdh20,Gm38031	.	Intron	intron_variant	1	1	104782787	1055	downstream	intronic	ADAR	0.384615	2	8	0.25	2	4	0.5	6	14	0.428571	0	0	4	0	0	12	0	0	12	0	0.230769	3	12	0.25	3	7	0.428571	0	7	0
chr1	104781968	+	A	chr1:104781968	Cdh20,Gm38031	LINE	Intron	intron_variant	1	1	104782672	704	downstream	intronic	ADAR	0.196262	11	40	0.275	4	23	0.173913	6	44	0.136364	0	0	9	0	0	31	0	0	11	0	0.285714	3	12	0.25	4	13	0.307692	3	10	0.3
chr1	104781972	+	A	chr1:104781972	Cdh20,Gm38031	LINE	Intron	intron_variant	0	0	104782668	696	downstream	intronic	ADARB1	0.169643	5	41	0.121951	7	26	0.269231	7	45	0.155556	0	0	9	0	0	30	0	0	12	0	0	0	11	0	0	13	0	0	9	0
chr1	104781980	+	A	chr1:104781980	Cdh20,Gm38031	LINE	Intron	intron_variant	0	0	104782659	679	downstream	intronic	ADARB1	0.057377	3	48	0.0625	2	27	0.0740741	2	47	0.0425532	0	0	9	0	0	36	0	0	12	0	0	0	11	0	0	12	0	0	10	0
chr1	104781985	+	A	chr1:104781985	Cdh20,Gm38031	LINE	Intron	intron_variant	0	0	104782654	669	downstream	intronic	ADAR	0.075	3	48	0.0625	4	26	0.153846	2	46	0.0434783	0	0	8	0	0	35	0	0	12	0	0.0740741	2	8	0.25	0	10	0	0	9	0
chr1	104782655	+	A	chr1:104782655	Cdh20,Gm38031	.	Intron	intron_variant	0	0	104781986	669	upstream	intronic	ADAR	0.0405405	0	20	0	1	19	0.0526316	2	35	0.0571429	0	0	19	0	0	18	0	0	5	0	0.0909091	0	6	0	0	7	0	2	9	0.222222
chr1	104782656	+	A	chr1:104782656	Cdh20,Gm38031	.	Intron	intron_variant	0	0	104781985	671	upstream	intronic	ADARB1	0.121622	4	19	0.210526	3	19	0.157895	2	36	0.0555556	0	0	20	0	0	18	0	0	21	0	0	0	6	0	0	7	0	0	9	0
chr1	104782658	+	A	chr1:104782658	Cdh20,Gm38031	.	Intron	intron_variant	0	0	104781984	674	upstream	intronic	ADARB1	0.1125	3	22	0.136364	2	21	0.0952381	4	37	0.108108	0	0	21	0	0	18	0	0	20	0	0	0	6	0	0	7	0	0	9	0
chr1	104782724	+	A	chr1:104782724	Cdh20,Gm38031	.	Intron	intron_variant	0	0	104781938	786	upstream	intronic	ADAR	0.0666667	4	23	0.173913	1	36	0.0277778	2	46	0.0434783	0	0	27	0	0	30	0	0	14	0	0.130435	1	10	0.1	0	5	0	2	8	0.25
chr1	104782781	+	A	chr1:104782781	Cdh20,Gm38031	.	Intron	intron_variant	0	0	104781734	1047	upstream	intronic	ADARB1	0.101562	8	34	0.235294	2	52	0.0384615	3	42	0.0714286	0	0	34	0	0	32	0	0	23	0	0	0	10	0	0	12	0	0	10	0
chr1	104782784	+	A	chr1:104782784	Cdh20,Gm38031	.	Intron	intron_variant	0	0	104781734	1050	upstream	intronic	ADAR	0.10084	5	32	0.15625	4	47	0.0851064	3	40	0.075	0	0	33	0	0	32	0	0	25	0	0.0625	0	9	0	0	13	0	2	10	0.2
chr1	104782818	+	A	chr1:104782818	Cdh20,Gm38031	.	Intron	intron_variant	0	0	104781697	1121	upstream	intronic	ADARB1	0.0827586	3	44	0.0681818	6	53	0.113208	3	48	0.0625	0	0	36	0	0	35	0	0	26	0	0	0	17	0	0	12	0	0	11	0
chr1	104782833	+	A	chr1:104782833	Cdh20,Gm38031	.	Intron	intron_variant	0	0	104781683	1150	upstream	intronic	ADARB1	0.116883	8	49	0.163265	6	57	0.105263	4	48	0.0833333	0	0	28	0	0	33	0	0	26	0	0	0	16	0	0	15	0	0	11	0
chr1	104789107	+	A	chr1:104789107	Cdh20	LINE	Intron	intron_variant	0	0	-	-	-	-	ADARB1	0.207547	2	18	0.111111	1	11	0.0909091	8	24	0.333333	0	0	12	0	0	7	0	0	23	0	0	0	3	0	0	4	0	0	4	0
chr1	104789161	+	A	chr1:104789161	Cdh20	LINE	Intron	intron_variant	0	0	104790614	1453	downstream	intronic	ADARB1	0.158537	6	36	0.166667	3	20	0.15	4	26	0.153846	0	0	23	0	0	13	0	0	23	0	0	0	6	0	0	4	0	0	11	0
chr1	104790558	+	A	chr1:104790558	Cdh20	LINE	Intron	intron_variant	0	0	104789219	1339	upstream	intronic	ADAR	0.190476	4	43	0.0930233	11	41	0.268293	9	42	0.214286	0	0	40	0	0	26	0	0	25	0	0.028169	0	13	0	0	33	0	2	25	0.08
chr1	104790563	+	A	chr1:104790563	Cdh20	LINE	Intron	intron_variant	0	0	104789213	1350	upstream	intronic	ADARB1	0.0601504	1	47	0.0212766	5	44	0.113636	2	42	0.047619	0	0	40	0	0	30	0	0	33	0	0	0	14	0	0	32	0	0	26	0
chr1	104790605	+	A	chr1:104790605	Cdh20	LINE	Intron	intron_variant	0	0	-	-	-	-	ADARB1	0.028777	1	51	0.0196078	1	44	0.0227273	2	44	0.0454545	0	0	30	0	0	39	0	0	30	0	0	0	14	0	0	31	0	0	26	0
chr1	104790703	+	A	chr1:104790703	Cdh20	LINE	Intron	intron_variant	0	0	104789119	1584	upstream	intronic	ADARB1	0.0291262	0	43	0	2	36	0.0555556	1	24	0.0416667	0	0	20	0	0	28	0	0	29	0	0	0	7	0	0	25	0	0	18	0
chr1	104852159	+	A	chr1:104852159	Cdh20	LTR	Intron	intron_variant	0	0	-	-	-	-	ADAR	0.0289855	1	25	0.04	0	17	0	1	27	0.037037	0	0	16	0	0	16	0	0	32	0	0.0714286	0	8	0	2	10	0.2	0	10	0
chr1	104894295	+	A	chr1:104894295	Cdh20	LINE	Intron	intron_variant	0	0	-	-	-	-	ADARB1	0.185185	4	10	0.4	1	3	0.333333	0	14	0	0	0	6	0	0	5	0	0	30	0	0	0	3	0	0	4	0	0	3	0
chr1	104894550	+	A	chr1:104894550	Cdh20	LINE	Intron	intron_variant	0	0	-	-	-	-	ADARB1	0.190476	0	5	0	3	12	0.25	1	4	0.25	0	0	4	0	0	8	0	0	16	0	0	0	2	0	0	3	0	0	6	0
chr1	105216274	-	T	chr1:105216274	-	LTR	intergenic	intergenic_variant	0	0	-	-	-	-	ADARB1	0.133333	0	4	0	1	5	0.2	1	6	0.166667	0	0	1	0	0	4	0	0	17	0	0	0	6	0	0	14	0	0	5	0
chr1	105257927	-	T	chr1:105257927	-	SINE	intergenic	intergenic_variant	0	0	105260323	2396	upstream	intergenic	ADARB1	0.130435	3	26	0.115385	0	10	0	3	10	0.3	0	0	2	0	0	5	0	0	37	0	0	0	8	0	0	14	0	0	12	0
chr1	105257931	-	T	chr1:105257931	-	SINE	intergenic	intergenic_variant	0	0	-	-	-	-	ADARB1	0.108696	3	26	0.115385	2	10	0.2	0	10	0	0	0	2	0	0	5	0	0	42	0	0	0	9	0	0	13	0	0	12	0
chr1	105257983	-	T	chr1:105257983	-	SINE	intergenic	intergenic_variant	0	0	-	-	-	-	ADARB1	0.15	0	22	0	2	8	0.25	4	10	0.4	0	0	0	NA	0	1	0	0	39	0	0	0	10	0	0	16	0	0	8	0
chr1	105258460	-	T	chr1:105258460	-	LTR	intergenic	intergenic_variant	0	0	105258952	492	upstream	undefined	ADARB1	0.118644	1	24	0.0416667	5	14	0.357143	1	21	0.047619	0	0	1	0	0	5	0	0	23	0	0	0	18	0	0	22	0	0	6	0
chr1	105258958	-	T	chr1:105258958	-	LTR	intergenic	intergenic_variant	0	0	105258454	504	downstream	undefined	ADARB1	0.707317	15	16	0.9375	4	8	0.5	10	17	0.588235	0	0	2	0	0	13	0	0	25	0	0	0	9	0	0	18	0	0	9	0
chr1	105258975	-	T	chr1:105258975	-	LTR	intergenic	intergenic_variant	0	0	-	-	-	-	ADAR	0.305556	4	10	0.4	4	8	0.5	3	18	0.166667	0	0	4	0	0	12	0	0	4	0	0.195122	4	10	0.4	4	23	0.173913	0	8	0
chr1	105259027	-	T	chr1:105259027	-	LTR	intergenic	intergenic_variant	0	0	105259268	241	upstream	undefined	ADAR	0.5	4	8	0.5	1	6	0.166667	7	10	0.7	0	0	3	0	0	10	0	0	1	0	0.852941	7	8	0.875	16	19	0.842105	6	7	0.857143
chr1	105262182	-	T	chr1:105262182	-	SINE	intergenic	intergenic_variant	0	0	-	-	-	-	ADAR	0.366667	4	9	0.444444	3	8	0.375	4	13	0.307692	0	0	4	0	0	10	0	0	1	0	0.0555556	0	14	0	1	17	0.0588235	1	5	0.2
chr1	105262194	-	T	chr1:105262194	-	SINE	intergenic	intergenic_variant	0	0	-	-	-	-	ADARB1	0.222222	1	8	0.125	4	8	0.5	1	11	0.0909091	0	0	4	0	0	10	0	0	1	0	0	0	15	0	0	19	0	0	7	0
chr1	105355757	-	T	chr1:105355757	Gm17634,Rnf152	.	Intron	regulatory_region_variant	0	0	-	-	-	-	ADARB1	0.0409357	4	60	0.0666667	1	51	0.0196078	2	60	0.0333333	0	0	12	0	0	26	0	0	1	0	0	0	17	0	0	37	0	0	13	0
chr1	105504636	-	T	chr1:105504636	Gm28403	SINE	Intron	non_coding_transcript_variant	0	0	105503728	908	downstream	intronic	ADARB1	0.16	3	5	0.6	1	8	0.125	0	12	0	0	0	1	0	0	2	0	0	2	0	0	0	5	0	0	0	NA	0	1	0
chr1	105504676	-	T	chr1:105504676	Gm28403	SINE	Intron	non_coding_transcript_variant	0	0	105503689	987	downstream	intronic	ADARB1	0.130435	2	8	0.25	1	6	0.166667	0	9	0	0	0	0	NA	0	1	0	0	7	0	0	0	5	0	0	0	NA	0	1	0
chr1	105542172	-	T	chr1:105542172	Gm28403,Pign	SINE	Intron	non_coding_transcript_variant	0	0	105544525	2353	upstream	intronic	ADARB1	0.0888889	1	10	0.1	2	13	0.153846	1	22	0.0454545	0	0	18	0	0	18	0	0	8	0	0	0	5	0	0	7	0	0	3	0
chr1	105542222	-	T	chr1:105542222	Gm28403,Pign	SINE	Intron	non_coding_transcript_variant	0	0	105539958	2264	downstream	Intron	ADARB1	0.244444	1	7	0.142857	4	19	0.210526	6	19	0.315789	0	0	25	0	0	18	0	0	7	0	0	0	8	0	0	5	0	0	2	0
chr1	105575057	-	T	chr1:105575057	Gm20302,Gm22426,Pign	LINE	Intron	intron_variant	0	0	-	-	-	-	ADARB1	0.0952381	3	23	0.130435	0	16	0	3	24	0.125	0	0	34	0	0	11	0	0	3	0	0	0	6	0	0	4	0	0	5	0
chr1	105575197	-	T	chr1:105575197	Gm20302,Gm22426,Pign	LINE	Intron	intron_variant	0	0	-	-	-	-	ADARB1	0.243243	2	14	0.142857	1	6	0.166667	6	17	0.352941	0	0	27	0	0	12	0	0	8	0	0	0	7	0	0	2	0	0	6	0
chr1	105575198	-	T	chr1:105575198	Gm20302,Gm22426,Pign	LINE	Intron	intron_variant	0	0	-	-	-	-	ADARB1	0.108108	1	14	0.0714286	0	6	0	3	17	0.176471	0	0	26	0	0	12	0	0	9	0	0	0	7	0	0	2	0	0	5	0
chr1	105575201	-	T	chr1:105575201	Gm20302,Gm22426,Pign	LINE	Intron	intron_variant	0	0	-	-	-	-	ADARB1	0.184211	1	14	0.0714286	2	6	0.333333	4	18	0.222222	0	0	27	0	0	15	0	0	21	0	0	0	6	0	0	2	0	0	5	0
chr1	105577021	-	T	chr1:105577021	Gm20302,Gm22426,Pign	LINE	Intron	intron_variant	0	0	-	-	-	-	ADARB1	0.407407	5	11	0.454545	1	6	0.166667	5	10	0.5	0	0	27	0	0	8	0	0	5	0	0	0	8	0	0	2	0	0	9	0
chr1	105578025	-	T	chr1:105578025	Gm20302,Gm22426,Pign	LINE	Intron	intron_variant	0	0	-	-	-	-	ADAR	0.346154	8	18	0.444444	3	14	0.214286	7	20	0.35	0	0	40	0	0	22	0	0	2	0	0.0909091	0	4	0	0	0	NA	1	7	0.142857
chr1	105578168	-	T	chr1:105578168	Gm20302,Gm22426,Pign	LINE	Intron	intron_variant	0	0	-	-	-	-	ADAR	0.160714	1	13	0.0769231	0	13	0	8	30	0.266667	0	0	55	0	0	30	0	0	16	0	0.047619	1	16	0.0625	0	2	0	0	3	0
chr1	105578227	-	T	chr1:105578227	Gm20302,Gm22426,Pign	LINE	Intron	intron_variant	0	0	-	-	-	-	ADAR	0.311111	2	7	0.285714	3	11	0.272727	9	27	0.333333	0	0	44	0	0	24	0	0	21	0	0.176471	3	12	0.25	0	3	0	0	2	0
chr1	105583802	-	T	chr1:105583802	Pign	SINE	Intron	intron_variant	0	0	-	-	-	-	ADARB1	0.0543478	4	37	0.108108	0	29	0	1	26	0.0384615	0	0	45	0	0	40	0	0	24	0	0	0	6	0	0	1	0	0	2	0
chr1	105593951	-	T	chr1:105593951	Pign	LINE	Intron	intron_variant	0	0	105595019	1068	upstream	intronic	ADAR	0.235294	2	6	0.333333	0	1	0	2	10	0.2	0	0	15	0	0	2	0	0	8	0	1	1	1	1	0	0	NA	0	0	NA
chr1	105595001	-	T	chr1:105595001	Pign	LINE	Intron	intron_variant	0	0	105593968	1033	downstream	intronic	ADARB1	0.272727	1	2	0.5	1	6	0.166667	1	3	0.333333	0	0	16	0	0	1	0	0	8	0	0	0	0	NA	0	3	0	0	0	NA
chr1	105595019	-	T	chr1:105595019	Pign	LINE	Intron	intron_variant	0	0	105593953	1066	downstream	intronic	ADARB1	0.181818	0	2	0	1	6	0.166667	1	3	0.333333	0	0	18	0	0	3	0	0	8	0	0	0	0	NA	0	3	0	0	0	NA
chr1	105595020	-	T	chr1:105595020	Pign	LINE	Intron	intron_variant	0	0	105593952	1068	downstream	intronic	ADARB1	0.25	1	2	0.5	1	6	0.166667	1	4	0.25	0	0	18	0	0	3	0	0	16	0	0	0	0	NA	0	3	0	0	0	NA
chr1	105595025	-	T	chr1:105595025	Pign	LINE	Intron	intron_variant	0	0	105593945	1080	downstream	intronic	ADARB1	0.4	1	2	0.5	2	7	0.285714	3	6	0.5	0	0	18	0	0	4	0	0	19	0	0	0	0	NA	0	3	0	0	0	NA
chr1	105595042	-	T	chr1:105595042	Pign	LINE	Intron	intron_variant	0	0	105593928	1114	downstream	intronic	ADARB1	0.615385	1	2	0.5	4	5	0.8	3	6	0.5	0	0	17	0	0	4	0	0	27	0	0	0	0	NA	0	2	0	0	0	NA
chr1	105621088	-	T	chr1:105621088	Gm8004,Pign	SINE	Intron	intron_variant	0	0	-	-	-	-	ADARB1	0.228571	2	12	0.166667	1	12	0.0833333	5	11	0.454545	0	0	28	0	0	10	0	0	15	0	0	0	4	0	0	4	0	0	10	0
chr1	105630012	-	T	chr1:105630012	Pign	SINE	Intron	intron_variant	0	0	105628525	1487	downstream	intronic	ADARB1	0.238095	2	7	0.285714	0	3	0	3	11	0.272727	0	0	10	0	0	4	0	0	19	NA	0	0	8	0	0	2	0	0	6	0
chr1	105667685	+	A	chr1:105667685	2310035C23Rik,Pign	SINE	Intron	non_coding_transcript_variant	0	0	-	-	-	-	ADARB1	0.103896	2	26	0.0769231	4	19	0.210526	2	32	0.0625	0	0	30	0	0	18	0	0	10	0	0	0	17	0	0	14	0	0	17	0
chr1	105676578	+	A	chr1:105676578	2310035C23Rik	.	Intron	non_coding_transcript_variant	0	0	105676440	138	upstream	intronic	ADARB1	0.166667	2	9	0.222222	2	9	0.222222	0	6	0	0	0	7	0	0	3	0	0	6	0	0	0	2	0	0	5	0	0	2	0
chr1	105676597	+	A	chr1:105676597	2310035C23Rik	.	Intron	non_coding_transcript_variant	0	0	105676421	176	upstream	intronic	ADARB1	0.166667	2	11	0.181818	2	14	0.142857	2	11	0.181818	0	0	12	0	0	3	0	0	7	0	0	0	2	0	0	8	0	0	4	0
chr1	105676645	+	A	chr1:105676645	2310035C23Rik	LINE	Intron	non_coding_transcript_variant	0	0	105676376	269	upstream	intronic	ADARB1	0.175439	3	18	0.166667	7	19	0.368421	0	20	0	0	0	23	0	0	7	0	0	7	0	0	0	4	0	0	9	0	0	6	0
chr1	105676670	+	A	chr1:105676670	2310035C23Rik	LINE	Intron	non_coding_transcript_variant	0	0	105676348	322	upstream	intronic	ADARB1	0.0606061	2	20	0.1	2	22	0.0909091	0	24	0	0	0	31	0	0	13	0	0	6	0	0	0	6	0	0	9	0	0	7	0
chr1	105676673	+	A	chr1:105676673	2310035C23Rik	LINE	Intron	non_coding_transcript_variant	0	0	105676345	328	upstream	intronic	ADARB1	0.136364	2	20	0.1	7	22	0.318182	0	24	0	0	0	31	0	0	14	0	0	10	0	0	0	7	0	0	9	0	0	8	0
chr1	105683356	+	A	chr1:105683356	2310035C23Rik	SINE	Intron	non_coding_transcript_variant	0	0	-	-	-	-	ADAR	0.104167	1	25	0.04	3	35	0.0857143	6	36	0.166667	0	0	40	0	0	37	0	0	7	0	0.0266667	0	20	0	2	28	0.0714286	0	27	0
chr1	105700927	+	A	chr1:105700927	2310035C23Rik	SINE	Intron	non_coding_transcript_variant	0	0	105698776	2151	upstream	intronic	ADARB1	0.0866667	6	41	0.146341	3	55	0.0545455	4	54	0.0740741	0	0	178	0	0	80	0	0	0	0	0	0	20	0	0	31	0	0	28	0
chr1	105730125	+	A	chr1:105730125	2310035C23Rik	SINE	Intron	non_coding_transcript_variant	0	0	105730774	649	downstream	intronic	ADARB1	0.106383	2	16	0.125	2	18	0.111111	1	13	0.0769231	0	0	50	0	0	37	0	0	21	0	0	0	28	0	0	24	0	0	23	0
chr1	105730132	+	A	chr1:105730132	2310035C23Rik	SINE	Intron	non_coding_transcript_variant	0	0	105730765	633	downstream	intronic	ADARB1	0.117647	1	16	0.0625	5	20	0.25	0	15	0	0	0	58	0	0	41	0	0	16	0	0	0	28	0	0	26	0	0	22	0
chr1	105730149	+	A	chr1:105730149	2310035C23Rik	SINE	Intron	non_coding_transcript_variant	0	0	105730748	599	downstream	intronic	ADARB1	0.0945946	2	38	0.0526316	3	19	0.157895	2	17	0.117647	0	0	65	0	0	40	0	0	22	0	0	0	29	0	0	23	0	0	29	0
chr1	105730172	+	A	chr1:105730172	2310035C23Rik	SINE	Intron	non_coding_transcript_variant	0	0	105730723	551	downstream	intronic	ADAR	0.0873786	1	47	0.0212766	5	29	0.172414	3	27	0.111111	0	0	85	0	0	40	0	0	20	0	0.118421	6	26	0.230769	0	16	0	3	34	0.0882353
chr1	105730247	+	A	chr1:105730247	2310035C23Rik	SINE	Intron	non_coding_transcript_variant	0	0	105730648	401	downstream	intronic	ADARB1	0.027972	1	44	0.0227273	2	48	0.0416667	1	51	0.0196078	0	0	110	0	0	53	0	0	22	0	0	0	31	0	0	31	0	0	35	0
chr1	105730645	+	A	chr1:105730645	2310035C23Rik	SINE	Intron	non_coding_transcript_variant	0	0	105730250	395	upstream	intronic	ADAR	0.045977	0	54	0	4	60	0.0666667	4	60	0.0666667	0	0	100	0	0	73	0	0	23	0	0.0104167	0	29	0	1	35	0.0285714	0	32	0
chr1	105730652	+	A	chr1:105730652	2310035C23Rik	SINE	Intron	non_coding_transcript_variant	0	0	105730243	409	upstream	intronic	ADAR	0.0568182	4	53	0.0754717	1	62	0.016129	5	61	0.0819672	0	0	102	0	0	74	0	0	38	0	0.0210526	2	29	0.0689655	0	34	0	0	32	0
chr1	105730653	+	A	chr1:105730653	2310035C23Rik	SINE	Intron	non_coding_transcript_variant	0	0	105730242	411	upstream	intronic	ADAR	0.0462428	0	52	0	3	60	0.05	5	61	0.0819672	0	0	107	0	0	72	0	0	62	0	0.0208333	2	29	0.0689655	0	34	0	0	33	0
chr1	105730688	+	A	chr1:105730688	2310035C23Rik	SINE	Intron	non_coding_transcript_variant	0	0	105730207	481	upstream	intronic	ADAR	0.0361446	3	48	0.0625	2	57	0.0350877	1	61	0.0163934	0	0	116	0	0	70	0	0	28	0	0.010101	0	34	0	0	31	0	1	34	0.0294118
chr1	105730714	+	A	chr1:105730714	2310035C23Rik	SINE	Intron	non_coding_transcript_variant	0	0	105730181	533	upstream	intronic	ADARB1	0.124031	4	35	0.114286	2	40	0.05	10	54	0.185185	0	0	98	0	0	61	0	0	27	0	0	0	30	0	0	28	0	0	30	0
chr1	105730715	+	A	chr1:105730715	2310035C23Rik	SINE	Intron	non_coding_transcript_variant	0	0	105730180	535	upstream	intronic	ADAR	0.0610687	2	35	0.0571429	4	41	0.097561	2	55	0.0363636	0	0	100	0	0	61	0	0	31	0	0.0224719	2	31	0.0645161	0	28	0	0	30	0
chr1	105730716	+	A	chr1:105730716	2310035C23Rik	SINE	Intron	non_coding_transcript_variant	0	0	105730179	537	upstream	intronic	ADAR	0.0472441	3	35	0.0857143	0	40	0	3	52	0.0576923	0	0	103	0	0	60	0	0	41	0	0.0227273	2	31	0.0645161	0	27	0	0	30	0
chr1	105730726	+	A	chr1:105730726	2310035C23Rik	SINE	Intron	non_coding_transcript_variant	0	0	105730169	557	upstream	intronic	ADAR	0.185185	7	35	0.2	9	30	0.3	4	43	0.0930233	0	0	93	0	0	51	0	0	55	0	0.0333333	1	31	0.0322581	0	31	0	2	28	0.0714286
chr1	105730727	+	A	chr1:105730727	2310035C23Rik	SINE	Intron	non_coding_transcript_variant	0	0	105730168	559	upstream	intronic	ADARB1	0.17757	3	34	0.0882353	7	30	0.233333	9	43	0.209302	0	0	90	0	0	51	0	0	43	0	0	0	31	0	0	30	0	0	27	0
chr1	105732828	+	A	chr1:105732828	2310035C23Rik	.	Intron	non_coding_transcript_variant	0	0	105733419	591	downstream	intronic	ADAR	0.160839	5	34	0.147059	6	36	0.166667	12	73	0.164384	0	0	115	0	0	77	0	0	42	0	0.00854701	0	51	0	1	31	0.0322581	0	35	0
chr1	105733415	+	A	chr1:105733415	2310035C23Rik	LTR	Intron	non_coding_transcript_variant	0	0	105732832	583	upstream	intronic	ADARB1	0.125628	2	46	0.0434783	11	72	0.152778	12	81	0.148148	0	0	136	0	0	98	0	0	42	0	0	0	57	0	0	51	0	0	26	0
chr1	105733416	+	A	chr1:105733416	2310035C23Rik	LTR	Intron	non_coding_transcript_variant	0	0	105732831	585	upstream	intronic	ADARB1	0.0351759	1	47	0.0212766	3	72	0.0416667	3	80	0.0375	0	0	135	0	0	97	0	0	44	0	0	0	57	0	0	52	0	0	26	0
chr1	105733417	+	A	chr1:105733417	2310035C23Rik	LTR	Intron	non_coding_transcript_variant	0	0	105732830	587	upstream	intronic	ADARB1	0.0696517	1	47	0.0212766	8	72	0.111111	5	82	0.0609756	0	0	138	0	0	96	0	0	45	0	0	0	56	0	0	50	0	0	26	0
chr1	105733428	+	A	chr1:105733428	2310035C23Rik	LTR	Intron	non_coding_transcript_variant	0	0	105732821	607	upstream	intronic	ADARB1	0.0212766	1	58	0.0172414	2	81	0.0246914	2	96	0.0208333	0	0	159	0	0	106	0	0	46	0	0	0	60	0	0	53	0	0	27	0
chr1	105733429	+	A	chr1:105733429	2310035C23Rik	LTR	Intron	non_coding_transcript_variant	0	0	105732818	611	upstream	intronic	ADAR	0.323529	17	59	0.288136	25	83	0.301205	35	96	0.364583	0	0	159	0	0	108	0	0	47	0	0.107143	4	62	0.0645161	8	51	0.156863	3	27	0.111111
chr1	105733430	+	A	chr1:105733430	2310035C23Rik	LTR	Intron	non_coding_transcript_variant	0	0	105732818	612	upstream	intronic	ADAR	0.0909091	2	59	0.0338983	3	84	0.0357143	17	99	0.171717	0	0	158	0	0	110	0	0	41	0	0.0780142	6	62	0.0967742	3	53	0.0566038	2	26	0.0769231
chr1	105733431	+	A	chr1:105733431	2310035C23Rik	LTR	Intron	non_coding_transcript_variant	0	0	105732817	614	upstream	intronic	ADAR	0.0284553	0	59	0	2	85	0.0235294	5	102	0.0490196	0	0	159	0	0	109	0	0	41	0	0.00719424	0	61	0	1	52	0.0192308	0	26	0
chr1	105736896	+	A	chr1:105736896	2310035C23Rik	SINE	Intron	non_coding_transcript_exon_variant	0	0	-	-	-	-	ADAR	0.2	4	27	0.148148	3	16	0.1875	8	32	0.25	0	0	67	0	0	56	0	0	45	0	0.015873	1	22	0.0454545	0	27	0	0	14	0
chr1	105740002	+	A	chr1:105740002	2310035C23Rik	SINE	Intron	NMD_transcript_variant	1	1	-	-	-	-	ADAR	0.2	8	37	0.216216	6	28	0.214286	11	60	0.183333	0	0	90	0	0	67	0	0	59	0	0.0291971	1	61	0.0163934	3	40	0.075	0	36	0
chr1	105740029	+	A	chr1:105740029	2310035C23Rik	SINE	Intron	NMD_transcript_variant	1	1	-	-	-	-	ADARB1	0.0757576	3	38	0.0789474	2	32	0.0625	5	62	0.0806452	0	0	110	0	0	66	0	0	60	0	0	0	65	0	0	43	0	0	47	0
chr1	105740043	+	A	chr1:105740043	2310035C23Rik	SINE	Intron	NMD_transcript_variant	0	0	-	-	-	-	ADAR	0.122137	3	38	0.0789474	1	33	0.030303	12	60	0.2	0	0	112	0	0	71	0	0	61	0	0.0344828	3	62	0.0483871	0	39	0	2	44	0.0454545
chr1	105740063	+	A	chr1:105740063	2310035C23Rik	SINE	Intron	NMD_transcript_variant	1	1	-	-	-	-	ADAR	0.0952381	3	38	0.0789474	3	41	0.0731707	8	68	0.117647	0	0	125	0	0	93	0	0	64	0	0.0075188	1	57	0.0175439	0	34	0	0	42	0
chr1	106180911	+	A	chr1:106180911	Phlpp1	SINE	Intron	regulatory_region_variant	0	0	-	-	-	-	ADARB1	0.0812183	9	64	0.140625	3	45	0.0666667	4	88	0.0454545	0	0	67	0	0	59	0	0	67	0	0	0	44	0	0	31	0	0	34	0
chr1	106181754	+	A	chr1:106181754	Phlpp1	SINE	Intron	intron_variant	0	0	-	-	-	-	ADARB1	0.159574	11	44	0.25	1	23	0.0434783	3	27	0.111111	0	0	30	0	0	31	0	0	67	0	0	0	34	0	0	35	0	0	57	0
chr1	106224972	+	A	chr1:106224972	Gm38235,Phlpp1	SINE	Intron	intron_variant	0	0	106225608	636	downstream	intronic	ADARB1	0.0526316	2	35	0.0571429	1	23	0.0434783	2	37	0.0540541	0	0	49	0	0	48	0	0	67	0	0	0	24	0	0	27	0	0	23	0
chr1	106224988	+	A	chr1:106224988	Gm38235,Phlpp1	SINE	Intron	intron_variant	0	0	106225594	606	downstream	intronic	ADARB1	0.0555556	2	33	0.0606061	2	29	0.0689655	2	46	0.0434783	0	0	56	0	0	51	0	0	23	0	0	0	25	0	0	24	0	0	29	0
chr1	106255379	+	A	chr1:106255379	Phlpp1	LINE	Intron	intron_variant	0	0	-	-	-	-	ADARB1	0.107143	0	9	0	2	9	0.222222	1	10	0.1	0	0	7	0	0	7	0	0	57	0	0	0	3	0	0	2	0	0	3	0
chr1	106580832	-	T	chr1:106580832	Bcl2	.	Intron	intron_variant	0	0	106581258	426	upstream	intronic	ADARB1	0.126761	4	20	0.2	5	27	0.185185	0	24	0	0	0	20	0	0	23	0	0	64	0	0	0	7	0	0	13	0	0	6	0
chr1	106580841	-	T	chr1:106580841	Bcl2	.	Intron	intron_variant	0	0	106581249	408	upstream	intronic	ADARB1	0.0967742	1	20	0.05	5	23	0.217391	0	19	0	0	0	21	0	0	18	0	0	70	0	0	0	6	0	0	13	0	0	8	0
chr1	106580848	-	T	chr1:106580848	Bcl2	.	Intron	intron_variant	0	0	106581242	394	upstream	intronic	ADARB1	0.166667	4	17	0.235294	4	23	0.173913	2	20	0.1	0	0	19	0	0	14	0	0	85	0	0	0	10	0	0	9	0	0	9	0
chr1	106580865	-	T	chr1:106580865	Bcl2	.	Intron	intron_variant	0	0	106581225	360	upstream	intronic	ADARB1	0.258621	2	17	0.117647	5	19	0.263158	8	22	0.363636	0	0	19	0	0	15	0	0	41	0	0	0	13	0	0	8	0	0	13	0
chr1	106580866	-	T	chr1:106580866	Bcl2	.	Intron	intron_variant	0	0	-	-	-	-	ADAR	0.2	8	17	0.470588	3	20	0.15	1	23	0.0434783	0	0	20	0	0	15	0	0	25	0	0.0294118	1	12	0.0833333	0	10	0	0	12	0
chr1	106580873	-	T	chr1:106580873	Bcl2	.	Intron	intron_variant	0	0	106581217	344	upstream	intronic	ADARB1	0.142857	2	19	0.105263	4	19	0.210526	3	25	0.12	0	0	18	0	0	14	0	0	50	0	0	0	14	0	0	9	0	0	11	0
chr1	106682136	-	T	chr1:106682136	Bcl2	SINE	Intron	intron_variant	0	0	-	-	-	-	ADAR	0.134831	2	31	0.0645161	4	24	0.166667	6	34	0.176471	0	0	30	0	0	31	0	0	53	0	0.0666667	2	8	0.25	0	8	0	0	14	0
chr1	106686307	-	T	chr1:106686307	Bcl2	LINE	Intron	intron_variant	0	0	-	-	-	-	ADAR	0.0769231	3	24	0.125	2	18	0.111111	0	23	0	0	0	16	0	0	13	0	0	6	0	0.0555556	0	17	0	1	22	0.0454545	2	15	0.133333
chr1	110013427	+	A	chr1:110013427	Cdh7	LINE	Intron	NMD_transcript_variant	0	0	-	-	-	-	ADAR	0.192982	5	20	0.25	2	16	0.125	4	21	0.190476	0	0	4	0	0	10	0	0	34	0	0.208333	5	17	0.294118	4	15	0.266667	1	16	0.0625
chr1	110013538	+	A	chr1:110013538	Cdh7	LINE	Intron	NMD_transcript_variant	0	0	110014992	1454	downstream	intronic	ADARB1	0.0666667	3	35	0.0857143	1	11	0.0909091	1	29	0.0344828	0	0	10	0	0	19	0	0	28	0	0	0	25	0	0	13	0	0	17	0
chr1	110013541	+	A	chr1:110013541	Cdh7	LINE	Intron	NMD_transcript_variant	0	0	110014991	1450	downstream	intronic	ADARB1	0.0972222	6	34	0.176471	0	10	0	1	28	0.0357143	0	0	10	0	0	20	0	0	24	0	0	0	25	0	0	13	0	0	17	0
chr1	110013552	+	A	chr1:110013552	Cdh7	LINE	Intron	NMD_transcript_variant	0	0	110014978	1426	downstream	intronic	ADARB1	0.084507	5	34	0.147059	1	11	0.0909091	0	26	0	0	0	12	0	0	22	0	0	26	0	0	0	25	0	0	13	0	0	13	0
chr1	110013553	+	A	chr1:110013553	Cdh7	LINE	Intron	NMD_transcript_variant	0	0	110014977	1424	downstream	intronic	ADAR	0.0704225	1	34	0.0294118	1	11	0.0909091	3	26	0.115385	0	0	12	0	0	21	0	0	26	0	0.0392157	1	25	0.04	0	13	0	1	13	0.0769231
chr1	110013563	+	A	chr1:110013563	Cdh7	LINE	Intron	NMD_transcript_variant	0	0	110014968	1405	downstream	intronic	ADAR	0.166667	6	33	0.181818	2	10	0.2	3	23	0.130435	0	0	12	0	0	23	0	0	28	0	0.0625	0	22	0	2	12	0.166667	1	14	0.0714286
chr1	110013585	+	A	chr1:110013585	Cdh7	LINE	Intron	NMD_transcript_variant	0	0	110014946	1361	downstream	intronic	ADAR	0.203125	8	31	0.258065	0	10	0	5	23	0.217391	0	0	11	0	0	26	0	0	26	0	0.0465116	0	23	0	2	11	0.181818	0	9	0
chr1	110014967	+	A	chr1:110014967	Cdh7	LINE	Intron	NMD_transcript_variant	0	0	110013564	1403	upstream	intronic	ADAR	0.0747664	3	30	0.1	1	43	0.0232558	4	34	0.117647	0	0	11	0	0	47	0	0	18	0	0.0344828	2	20	0.1	0	27	0	0	11	0
chr1	110014972	+	A	chr1:110014972	Cdh7	LINE	Intron	NMD_transcript_variant	0	0	-	-	-	-	ADAR	0.127451	4	28	0.142857	3	43	0.0697674	6	31	0.193548	0	0	11	0	0	47	0	0	8	0	0.169492	4	21	0.190476	5	27	0.185185	1	11	0.0909091
chr1	110014973	+	A	chr1:110014973	Cdh7	LINE	Intron	NMD_transcript_variant	0	0	110013558	1415	upstream	intronic	ADAR	0.571429	14	29	0.482759	20	42	0.47619	22	27	0.814815	0	0	12	0	0	44	0	0	11	0	0.37931	7	21	0.333333	9	26	0.346154	6	11	0.545455
chr1	110015005	+	A	chr1:110015005	Cdh7	LINE	Intron	NMD_transcript_variant	0	0	-	-	-	-	ADAR	0.108108	4	26	0.153846	1	28	0.0357143	3	20	0.15	0	0	10	0	0	33	0	0	11	0	0.0465116	0	13	0	2	22	0.0909091	0	8	0
chr1	110015006	+	A	chr1:110015006	Cdh7	LINE	Intron	NMD_transcript_variant	0	0	-	-	-	-	ADAR	0.319444	6	25	0.24	11	28	0.392857	6	19	0.315789	0	0	9	0	0	33	0	0	12	0	0.166667	0	13	0	6	20	0.3	1	9	0.111111
chr1	110015170	+	A	chr1:110015170	Cdh7	LINE	Intron	NMD_transcript_variant	0	0	-	-	-	-	ADARB1	0.101695	1	18	0.0555556	2	19	0.105263	3	22	0.136364	0	0	12	0	0	22	0	0	11	0	0	0	21	0	0	19	0	0	14	0
chr1	110035851	+	A	chr1:110035851	Cdh7	LINE	Intron	NMD_transcript_variant	0	0	-	-	-	-	ADARB1	0.108696	0	17	0	4	11	0.363636	1	18	0.0555556	0	0	4	0	0	20	0	0	10	0	0	0	21	0	0	18	0	0	31	0
chr1	110073549	+	A	chr1:110073549	Cdh7	Low	Intron	NMD_transcript_variant	0	0	-	-	-	-	ADARB1	0.104478	1	34	0.0294118	0	3	0	6	30	0.2	0	0	14	0	0	2	0	0	10	0	0	0	19	0	0	15	0	0	17	0
chr1	110117433	+	A	chr1:110117433	Cdh7	SINE	Intron	NMD_transcript_variant	0	0	-	-	-	-	ADARB1	0.116279	0	5	0	2	18	0.111111	3	20	0.15	0	0	7	0	0	10	0	0	15	0	0	0	8	0	0	7	0	0	12	0
chr1	110117732	+	A	chr1:110117732	Cdh7	SINE	Intron	NMD_transcript_variant	0	0	-	-	-	-	ADARB1	0.0645161	2	21	0.0952381	4	34	0.117647	0	38	0	0	0	12	0	0	19	0	0	15	0	0	0	27	0	0	32	0	0	20	0
chr1	110117736	+	A	chr1:110117736	Cdh7	SINE	Intron	NMD_transcript_variant	0	0	110117424	312	upstream	intronic	ADAR	0.168421	0	21	0	6	35	0.171429	10	39	0.25641	0	0	12	0	0	20	0	0	15	0	0.0253165	0	27	0	1	33	0.030303	1	19	0.0526316
chr1	110117769	+	A	chr1:110117769	Cdh7	SINE	Intron	NMD_transcript_variant	0	0	-	-	-	-	ADARB1	0.40625	14	27	0.518519	13	35	0.371429	12	34	0.352941	0	0	12	0	0	18	0	0	12	0	0	0	28	0	0	29	0	0	27	0
chr1	11163303	+	A	chr1:11163303	Prex2	LTR	Intron	intron_variant	0	0	-	-	-	-	ADARB1	0.153846	1	8	0.125	1	12	0.0833333	2	6	0.333333	0	0	11	0	0	13	0	0	7	0	0	0	3	0	0	2	0	0	2	0
chr1	11163413	+	A	chr1:11163413	Prex2	LTR	Intron	intron_variant	0	0	-	-	-	-	ADARB1	0.181818	1	8	0.125	1	10	0.1	2	4	0.5	0	0	5	0	0	4	0	0	13	0	0	0	4	0	0	0	NA	0	1	0
chr1	11165292	+	A	chr1:11165292	Prex2	LTR	Intron	intron_variant	0	0	-	-	-	-	ADAR	0.153846	1	8	0.125	2	10	0.2	1	8	0.125	0	0	11	0	0	11	0	0	15	0	0.333333	3	3	1	0	3	0	0	3	0
chr1	11165379	+	A	chr1:11165379	Prex2	LTR	Intron	intron_variant	0	0	-	-	-	-	ADARB1	0.108108	2	10	0.2	2	14	0.142857	0	13	0	0	0	10	0	0	20	0	0	16	0	0	0	0	NA	0	0	NA	0	2	0
chr1	111716929	-	T	chr1:111716929	-	LINE	intergenic	intergenic_variant	0	0	111719408	2479	upstream	undefined	ADARB1	0.103448	2	11	0.181818	0	2	0	1	16	0.0625	0	0	20	0	0	4	0	0	12	0	0	0	1	0	0	3	0	0	1	0
chr1	111728592	-	T	chr1:111728592	-	SINE	intergenic	intergenic_variant	0	0	111728892	300	upstream	undefined	ADAR	0.555556	2	4	0.5	1	3	0.333333	2	2	1	0	0	14	0	0	4	0	0	12	0	1	1	1	1	0	0	NA	0	0	NA
chr1	111734314	-	T	chr1:111734314	-	LINE	intergenic	intergenic_variant	0	0	-	-	-	-	ADARB1	0.105263	1	4	0.25	0	4	0	1	11	0.0909091	0	0	19	0	0	10	0	0	4	0	0	0	8	0	0	5	0	0	1	0
chr1	111734375	-	T	chr1:111734375	-	LINE	intergenic	intergenic_variant	0	0	-	-	-	-	ADARB1	0.227273	1	5	0.2	2	3	0.666667	2	14	0.142857	0	0	29	0	0	9	0	0	17	0	0	0	5	0	0	4	0	0	2	0
chr1	111741293	-	T	chr1:111741293	-	LINE	intergenic	intergenic_variant	0	0	-	-	-	-	ADAR	0.25	1	4	0.25	0	1	0	2	7	0.285714	0	0	5	0	0	2	0	0	30	0	0.4	0	2	0	2	2	1	0	1	0
chr1	111741369	-	T	chr1:111741369	-	LINE	intergenic	intergenic_variant	0	0	-	-	-	-	ADAR	0.6	8	10	0.8	3	5	0.6	4	10	0.4	0	0	9	0	0	3	0	0	44	0	0.6	0	1	0	0	0	NA	3	4	0.75
chr1	111763515	-	T	chr1:111763515	-	LINE	intergenic	intergenic_variant	0	0	-	-	-	-	ADARB1	0.25	3	11	0.272727	3	10	0.3	3	15	0.2	0	0	19	0	0	14	0	0	42	0	0	0	1	0	0	7	0	0	3	0
chr1	111763558	-	T	chr1:111763558	-	LINE	intergenic	intergenic_variant	0	0	-	-	-	-	ADAR	0.171429	4	10	0.4	1	9	0.111111	1	16	0.0625	0	0	19	0	0	11	0	0	38	0	0.166667	1	1	1	1	7	0.142857	0	4	0
chr1	111764315	-	T	chr1:111764315	-	LINE	intergenic	intergenic_variant	0	0	111763612	703	downstream	undefined	ADARB1	0.16129	2	7	0.285714	1	14	0.0714286	2	10	0.2	0	0	11	0	0	10	0	0	6	0	0	0	3	0	0	4	0	0	8	0
chr1	111764318	-	T	chr1:111764318	-	LINE	intergenic	intergenic_variant	0	0	111763609	709	downstream	undefined	ADAR	0.535714	5	7	0.714286	4	13	0.307692	6	8	0.75	0	0	11	0	0	10	0	0	6	0	0.0666667	0	3	0	0	4	0	1	8	0.125
chr1	111764395	-	T	chr1:111764395	-	LINE	intergenic	intergenic_variant	0	0	-	-	-	-	ADARB1	0.714286	4	4	1	10	14	0.714286	11	17	0.647059	0	0	15	0	0	5	0	0	8	0	0	0	6	0	0	3	0	0	10	0
chr1	111764425	-	T	chr1:111764425	-	LINE	intergenic	intergenic_variant	0	0	-	-	-	-	ADARB1	0.4	2	5	0.4	6	17	0.352941	10	23	0.434783	0	0	28	0	0	10	0	0	6	0	0	0	7	0	0	2	0	0	8	0
chr1	111764438	-	T	chr1:111764438	-	LINE	intergenic	intergenic_variant	0	0	-	-	-	-	ADAR	0.173913	1	4	0.25	4	17	0.235294	3	25	0.12	0	0	29	0	0	11	0	0	3	0	0.0625	0	7	0	0	2	0	1	7	0.142857
chr1	111803742	-	T	chr1:111803742	Gm8173	LINE	intergenic	downstream_gene_variant	0	0	111801444	2298	downstream	undefined	ADAR	0.0925926	3	23	0.130435	2	16	0.125	0	15	0	0	0	12	0	0	5	0	0	5	0	0.125	0	7	0	2	5	0.4	0	4	0
chr1	111806115	-	T	chr1:111806115	Gm8173	LINE	Intron	non_coding_transcript_variant	0	0	-	-	-	-	ADAR	0.266667	0	5	0	2	4	0.5	2	6	0.333333	0	0	14	0	0	2	0	0	5	0	0.222222	2	3	0.666667	0	1	0	0	5	0
chr1	111815669	-	T	chr1:111815669	-	LINE	intergenic	intergenic_variant	0	0	-	-	-	-	ADAR	0.323529	4	16	0.25	4	11	0.363636	3	7	0.428571	0	0	16	0	0	7	0	0	5	0	0.1	2	11	0.181818	0	7	0	0	2	0
chr1	111815704	-	T	chr1:111815704	-	LINE	intergenic	intergenic_variant	0	0	-	-	-	-	ADARB1	0.21875	2	13	0.153846	0	5	0	5	14	0.357143	0	0	11	0	0	8	0	0	8	0	0	0	11	0	0	5	0	0	3	0
chr1	111815711	-	T	chr1:111815711	-	LINE	intergenic	intergenic_variant	0	0	-	-	-	-	ADARB1	0.114286	2	16	0.125	0	6	0	2	13	0.153846	0	0	9	0	0	7	0	0	8	0	0	0	13	0	0	7	0	0	6	0
chr1	111815726	-	T	chr1:111815726	-	LINE	intergenic	intergenic_variant	0	0	-	-	-	-	ADAR	0.275	3	15	0.2	2	8	0.25	6	17	0.352941	0	0	10	0	0	10	0	0	18	0	0.111111	3	12	0.25	0	7	0	0	8	0
chr1	111815728	-	T	chr1:111815728	-	LINE	intergenic	intergenic_variant	0	0	-	-	-	-	ADAR	0.3	4	15	0.266667	3	8	0.375	5	17	0.294118	0	0	10	0	0	9	0	0	16	0	0.148148	3	12	0.25	0	7	0	1	8	0.125
chr1	111815729	-	T	chr1:111815729	-	LINE	intergenic	intergenic_variant	0	0	-	-	-	-	ADAR	0.146341	2	15	0.133333	3	8	0.375	1	18	0.0555556	0	0	10	0	0	9	0	0	16	0	0.269231	6	12	0.5	0	6	0	1	8	0.125
chr1	111815731	-	T	chr1:111815731	-	LINE	intergenic	intergenic_variant	0	0	-	-	-	-	ADAR	0.219512	5	15	0.333333	0	8	0	4	18	0.222222	0	0	9	0	0	9	0	0	12	0	0.16	3	12	0.25	0	6	0	1	7	0.142857
chr1	111815744	-	T	chr1:111815744	-	LINE	intergenic	intergenic_variant	0	0	-	-	-	-	ADAR	0.315789	3	14	0.214286	1	7	0.142857	8	17	0.470588	0	0	11	0	0	10	0	0	4	0	0.08	2	11	0.181818	0	7	0	0	7	0
chr1	111815831	-	T	chr1:111815831	-	LINE	intergenic	intergenic_variant	0	0	-	-	-	-	ADARB1	0.16	0	7	0	3	11	0.272727	5	32	0.15625	0	0	19	0	0	20	0	0	8	0	0	0	7	0	0	8	0	0	12	0
chr1	111822600	-	T	chr1:111822600	-	LINE	intergenic	intergenic_variant	0	0	-	-	-	-	ADARB1	0.0652174	1	10	0.1	1	13	0.0769231	1	23	0.0434783	0	0	22	0	0	15	0	0	8	0	0	0	8	0	0	7	0	0	13	0
chr1	111822625	-	T	chr1:111822625	-	LINE	intergenic	intergenic_variant	0	0	-	-	-	-	ADARB1	0.302326	0	8	0	3	11	0.272727	10	24	0.416667	0	0	22	0	0	16	0	0	8	0	0	0	8	0	0	7	0	0	8	0
chr1	111822699	-	T	chr1:111822699	-	LINE	intergenic	intergenic_variant	0	0	-	-	-	-	ADAR	0.205882	0	5	0	4	8	0.5	3	21	0.142857	0	0	23	0	0	15	0	0	10	0	0.0526316	0	7	0	0	4	0	1	8	0.125
chr1	111822721	-	T	chr1:111822721	-	LINE	intergenic	intergenic_variant	1	1	-	-	-	-	ADAR	0.48	1	4	0.25	4	7	0.571429	7	14	0.5	0	0	18	0	0	16	0	0	10	0	0.222222	3	7	0.428571	0	4	0	1	7	0.142857
chr1	111828924	-	T	chr1:111828924	Gm37934	LINE	intergenic	upstream_gene_variant	0	0	-	-	-	-	ADARB1	0.0576923	1	20	0.05	2	20	0.1	0	12	0	0	0	26	0	0	2	0	0	10	0	0	0	8	0	0	10	0	0	16	0
chr1	111835683	-	T	chr1:111835683	Gm37934	LINE	intergenic	downstream_gene_variant	0	0	-	-	-	-	ADARB1	0.0625	2	31	0.0645161	2	19	0.105263	1	30	0.0333333	0	0	36	0	0	21	0	0	10	0	0	0	5	0	0	6	0	0	7	0
chr1	111835688	-	T	chr1:111835688	Gm37934	LINE	intergenic	downstream_gene_variant	0	0	-	-	-	-	ADAR	0.0987654	1	31	0.0322581	4	19	0.210526	3	31	0.0967742	0	0	35	0	0	21	0	0	13	0	0.0588235	0	4	0	1	7	0.142857	0	6	0
chr1	111835719	-	T	chr1:111835719	Gm37934	LINE	intergenic	downstream_gene_variant	0	0	-	-	-	-	ADAR	0.0666667	0	21	0	4	26	0.153846	1	28	0.0357143	0	0	30	0	0	17	0	0	9	0	0.05	0	5	0	1	11	0.0909091	0	4	0
chr1	111835728	-	T	chr1:111835728	Gm37934	LINE	intergenic	downstream_gene_variant	0	0	-	-	-	-	ADAR	0.123288	0	20	0	4	26	0.153846	5	27	0.185185	0	0	26	0	0	14	0	0	14	0	0.2	0	5	0	4	11	0.363636	0	4	0
chr1	111835812	-	T	chr1:111835812	Gm37934	LINE	intergenic	downstream_gene_variant	0	0	-	-	-	-	ADAR	0.147059	0	23	0	6	26	0.230769	4	19	0.210526	0	0	28	0	0	12	0	0	12	0	0.238095	0	5	0	4	14	0.285714	1	2	0.5
chr1	111835813	-	T	chr1:111835813	Gm37934	LINE	intergenic	downstream_gene_variant	0	0	-	-	-	-	ADARB1	0.0441176	2	23	0.0869565	0	26	0	1	19	0.0526316	0	0	28	0	0	12	0	0	8	0	0	0	4	0	0	14	0	0	2	0
chr1	111835907	-	T	chr1:111835907	Gm37934	LINE	intergenic	downstream_gene_variant	0	0	-	-	-	-	ADAR	0.149254	5	26	0.192308	1	16	0.0625	4	25	0.16	0	0	22	0	0	8	0	0	5	0	0.0526316	0	4	0	0	7	0	1	8	0.125
chr1	111835934	-	T	chr1:111835934	Gm37934	LINE	intergenic	downstream_gene_variant	0	0	-	-	-	-	ADARB1	0.101695	1	22	0.0454545	3	16	0.1875	2	21	0.0952381	0	0	11	0	0	7	0	0	8	0	0	0	6	0	0	6	0	0	10	0
chr1	111835963	-	T	chr1:111835963	Gm37934	LINE	intergenic	downstream_gene_variant	0	0	-	-	-	-	ADAR	0.0816327	0	15	0	1	15	0.0666667	3	19	0.157895	0	0	12	0	0	9	0	0	8	0	0.047619	0	8	0	0	4	0	1	9	0.111111
chr1	111835971	-	T	chr1:111835971	Gm37934	LINE	intergenic	downstream_gene_variant	0	0	-	-	-	-	ADAR	0.0784314	1	15	0.0666667	1	17	0.0588235	2	19	0.105263	0	0	12	0	0	10	0	0	8	0	0.0833333	0	7	0	0	6	0	2	11	0.181818
chr1	111835979	-	T	chr1:111835979	Gm37934	LINE	intergenic	downstream_gene_variant	0	0	-	-	-	-	ADAR	0.148148	2	15	0.133333	2	19	0.105263	4	20	0.2	0	0	13	0	0	12	0	0	10	0	0.0952381	1	7	0.142857	0	6	0	1	8	0.125
chr1	111835980	-	T	chr1:111835980	Gm37934	LINE	intergenic	downstream_gene_variant	0	0	-	-	-	-	ADAR	0.117647	1	14	0.0714286	1	17	0.0588235	4	20	0.2	0	0	14	0	0	11	0	0	11	0	0.210526	3	7	0.428571	0	5	0	1	7	0.142857
chr1	111836485	-	T	chr1:111836485	Gm37934	SINE	intergenic	downstream_gene_variant	0	0	-	-	-	-	ADAR	0.108108	1	9	0.111111	0	11	0	3	17	0.176471	0	0	24	0	0	1	0	0	8	0	0.0625	2	16	0.125	0	5	0	0	11	0
chr1	111840251	-	T	chr1:111840251	-	LINE	intergenic	intergenic_variant	0	0	111841412	1161	upstream	intergenic	ADAR	0.134328	5	34	0.147059	1	10	0.1	3	23	0.130435	0	0	16	0	0	16	0	0	8	0	0.0392157	1	19	0.0526316	1	23	0.0434783	0	9	0
chr1	111840326	-	T	chr1:111840326	-	LINE	intergenic	intergenic_variant	0	0	-	-	-	-	ADARB1	0.102041	3	19	0.157895	0	10	0	2	20	0.1	0	0	6	0	0	6	0	0	8	0	0	0	12	0	0	16	0	0	9	0
chr1	111843855	-	T	chr1:111843855	-	LINE	intergenic	intergenic_variant	0	0	-	-	-	-	ADAR	0.16	5	19	0.263158	0	14	0	3	17	0.176471	0	0	23	0	0	18	0	0	8	0	0.05	0	9	0	2	14	0.142857	0	17	0
chr1	111843923	-	T	chr1:111843923	-	LINE	intergenic	intergenic_variant	0	0	-	-	-	-	ADAR	0.240506	7	24	0.291667	1	20	0.05	11	35	0.314286	0	0	29	0	0	25	0	0	8	0	0.047619	2	13	0.153846	0	9	0	0	20	0
chr1	111843947	-	T	chr1:111843947	-	LINE	intergenic	intergenic_variant	0	0	-	-	-	-	ADARB1	0.0533333	3	22	0.136364	1	19	0.0526316	0	34	0	0	0	26	0	0	17	0	0	7	0	0	0	10	0	0	8	0	0	18	0
chr1	111843959	-	T	chr1:111843959	-	LINE	intergenic	intergenic_variant	0	0	-	-	-	-	ADARB1	0.0512821	2	21	0.0952381	1	22	0.0454545	1	35	0.0285714	0	0	26	0	0	16	0	0	8	0	0	0	12	0	0	7	0	0	16	0
chr1	111844032	-	T	chr1:111844032	-	LINE	intergenic	intergenic_variant	0	0	-	-	-	-	ADARB1	0.15	9	41	0.219512	2	30	0.0666667	4	29	0.137931	0	0	25	0	0	21	0	0	8	0	0	0	16	0	0	9	0	0	20	0
chr1	111844063	-	T	chr1:111844063	-	LINE	intergenic	intergenic_variant	0	0	-	-	-	-	ADAR	0.284091	11	35	0.314286	7	30	0.233333	7	23	0.304348	0	0	23	0	0	23	0	0	5	0	0.119048	1	14	0.0714286	4	12	0.333333	0	16	0
chr1	11439626	+	A	chr1:11439626	A830018L16Rik	LINE	Intron	non_coding_transcript_variant	0	0	-	-	-	-	ADARB1	0.08	0	12	0	2	20	0.1	2	18	0.111111	0	0	18	0	0	24	0	0	15	0	0	0	5	0	0	19	0	0	11	0
chr1	11441298	+	A	chr1:11441298	A830018L16Rik	LINE	Intron	non_coding_transcript_variant	0	0	11439961	1337	upstream	intronic	ADAR	0.121951	3	12	0.25	0	9	0	2	20	0.1	0	0	7	0	0	6	0	0	13	0	0.0357143	1	24	0.0416667	1	17	0.0588235	0	15	0
chr1	11548262	+	A	chr1:11548262	A830018L16Rik	LINE	Intron	NMD_transcript_variant	0	0	11549911	1649	downstream	intronic	ADARB1	0.25	3	3	1	0	2	0	1	11	0.0909091	0	0	3	0	0	2	0	0	6	0	0	0	1	0	0	2	0	0	10	0
chr1	115704429	+	A	chr1:115704429	Cntnap5a	.	Intron	intron_variant	0	0	115705629	1200	downstream	intronic	ADARB1	0.0769231	1	11	0.0909091	2	9	0.222222	0	19	0	0	0	10	0	0	1	0	0	21	0	0	0	14	0	0	9	0	0	14	0
chr1	115704613	+	A	chr1:115704613	Cntnap5a	LINE	Intron	intron_variant	0	0	115705431	818	downstream	intronic	ADARB1	0.043956	0	24	0	3	37	0.0810811	1	30	0.0333333	0	0	29	0	0	9	0	0	10	0	0	0	12	0	0	1	0	0	7	0
chr1	115708438	+	A	chr1:115708438	Cntnap5a	LINE	Intron	intron_variant	0	0	-	-	-	-	ADARB1	0.046875	1	27	0.037037	0	16	0	2	21	0.0952381	0	0	8	0	0	16	0	0	3	0	0	0	6	0	0	5	0	0	1	0
chr1	115717915	+	A	chr1:115717915	Cntnap5a	LINE	Intron	intron_variant	0	0	-	-	-	-	ADAR	0.0707071	2	33	0.0606061	1	21	0.047619	4	45	0.0888889	0	0	24	0	0	24	0	0	6	0	0.1	0	7	0	2	8	0.25	1	15	0.0666667
chr1	115719141	+	A	chr1:115719141	Cntnap5a	LINE	Intron	intron_variant	0	0	115718945	196	upstream	Intron	ADAR	0.208333	1	11	0.0909091	2	17	0.117647	7	20	0.35	0	0	8	0	0	15	0	0	5	0	0.15	0	7	0	2	11	0.181818	1	2	0.5
chr1	115719142	+	A	chr1:115719142	Cntnap5a	LINE	Intron	intron_variant	0	0	115718945	197	upstream	intronic	ADAR	0.285714	1	11	0.0909091	3	18	0.166667	10	20	0.5	0	0	8	0	0	15	0	0	5	0	0.2	1	7	0.142857	2	11	0.181818	1	2	0.5
chr1	115719151	+	A	chr1:115719151	Cntnap5a	LINE	Intron	intron_variant	0	0	-	-	-	-	ADAR	0.0888889	1	10	0.1	0	16	0	3	19	0.157895	0	0	7	0	0	13	0	0	8	0	0.157895	0	5	0	2	12	0.166667	1	2	0.5
chr1	115725720	+	A	chr1:115725720	Cntnap5a	.	Intron	intron_variant	0	0	115726148	428	downstream	intronic	ADAR	0.0839695	2	41	0.0487805	2	37	0.0540541	7	53	0.132075	0	0	48	0	0	22	0	0	12	0	0.0285714	0	14	0	0	10	0	1	11	0.0909091
chr1	115725722	+	A	chr1:115725722	Cntnap5a	.	Intron	intron_variant	0	0	115726146	424	downstream	intronic	ADARB1	0.0530303	1	41	0.0243902	3	38	0.0789474	3	53	0.0566038	0	0	46	0	0	22	0	0	7	0	0	0	13	0	0	11	0	0	10	0
chr1	115726188	+	A	chr1:115726188	Cntnap5a	.	Intron	intron_variant	0	0	115725680	508	upstream	intronic	ADARB1	0.0769231	2	23	0.0869565	2	29	0.0689655	3	39	0.0769231	0	0	21	0	0	21	0	0	33	0	0	0	9	0	0	12	0	0	15	0
chr1	115741556	+	A	chr1:115741556	Cntnap5a	LINE	Intron	intron_variant	0	0	-	-	-	-	ADARB1	0.0379747	1	39	0.025641	0	18	0	2	22	0.0909091	0	0	8	0	0	8	0	0	9	0	0	0	11	0	0	8	0	0	9	0
chr1	115741599	+	A	chr1:115741599	Cntnap5a	LINE	Intron	intron_variant	0	0	-	-	-	-	ADARB1	0.0363636	0	60	0	2	24	0.0833333	2	26	0.0769231	0	0	9	0	0	13	0	0	17	0	0	0	20	0	0	11	0	0	9	0
chr1	115748075	+	A	chr1:115748075	Cntnap5a	LINE	Intron	intron_variant	0	0	115750375	2300	downstream	intronic	ADARB1	0.177778	2	9	0.222222	3	14	0.214286	3	22	0.136364	0	0	11	0	0	14	0	0	7	0	0	0	10	0	0	6	0	0	2	0
chr1	115748106	+	A	chr1:115748106	Cntnap5a	LINE	Intron	intron_variant	0	0	115750341	2235	downstream	intronic	ADARB1	0.105263	3	12	0.25	0	18	0	3	27	0.111111	0	0	14	0	0	17	0	0	6	0	0	0	7	0	0	5	0	0	2	0
chr1	115748107	+	A	chr1:115748107	Cntnap5a	LINE	Intron	intron_variant	0	0	115750340	2233	downstream	intronic	ADARB1	0.196429	5	12	0.416667	4	19	0.210526	2	25	0.08	0	0	14	0	0	17	0	0	5	0	0	0	7	0	0	5	0	0	2	0
chr1	115787361	+	A	chr1:115787361	Cntnap5a	LINE	Intron	intron_variant	0	0	-	-	-	-	ADARB1	0.0434783	2	25	0.08	0	17	0	1	27	0.037037	0	0	9	0	0	2	0	0	45	0	0	0	7	0	0	8	0	0	8	0
chr1	115792584	+	A	chr1:115792584	Cntnap5a	LINE	Intron	intron_variant	0	0	-	-	-	-	ADARB1	0.0357143	2	29	0.0689655	0	22	0	1	33	0.030303	0	0	19	0	0	13	0	0	45	0	0	0	16	0	0	7	0	0	14	0
chr1	115792638	+	A	chr1:115792638	Cntnap5a	LINE	Intron	intron_variant	0	0	-	-	-	-	ADARB1	0.0337079	1	30	0.0333333	1	23	0.0434783	1	36	0.0277778	0	0	21	0	0	10	0	0	15	0	0	0	12	0	0	8	0	0	13	0
chr1	115821413	+	A	chr1:115821413	Cntnap5a	LINE	Intron	intron_variant	0	0	-	-	-	-	ADAR	0.407407	4	12	0.333333	0	4	0	7	11	0.636364	0	0	5	0	0	10	0	0	17	0	0.111111	1	3	0.333333	0	12	0	1	3	0.333333
chr1	115821459	+	A	chr1:115821459	Cntnap5a	LINE	Intron	intron_variant	0	0	-	-	-	-	ADAR	0.393939	6	11	0.545455	0	8	0	7	14	0.5	0	0	9	0	0	9	0	0	20	0	0.0555556	1	5	0.2	0	11	0	0	2	0
chr1	115824471	+	A	chr1:115824471	Cntnap5a	LINE	Intron	intron_variant	0	0	-	-	-	-	ADAR	0.325581	7	15	0.466667	1	9	0.111111	6	19	0.315789	0	0	4	0	0	6	0	0	19	0	0.25	1	6	0.166667	0	3	0	2	3	0.666667
chr1	115827483	+	A	chr1:115827483	Cntnap5a	.	Intron	intron_variant	0	0	115828580	1097	downstream	intronic	ADARB1	0.258065	4	13	0.307692	0	2	0	4	16	0.25	0	0	8	0	0	4	0	0	20	0	0	0	4	0	0	4	0	0	5	0
chr1	115827519	+	A	chr1:115827519	Cntnap5a	.	Intron	intron_variant	0	0	-	-	-	-	ADARB1	0.142857	2	10	0.2	0	2	0	1	9	0.111111	0	0	2	0	0	3	0	0	21	0	0	0	2	0	0	5	0	0	6	0
chr1	115835856	+	A	chr1:115835856	Cntnap5a	.	Intron	intron_variant	0	0	-	-	-	-	ADAR	0.241379	1	6	0.166667	4	7	0.571429	2	16	0.125	0	0	5	0	0	5	0	0	9	0	0.142857	2	7	0.285714	0	6	0	1	8	0.125
chr1	115835878	+	A	chr1:115835878	Cntnap5a	.	Intron	intron_variant	0	0	-	-	-	-	ADAR	0.777778	0	0	NA	6	8	0.75	8	10	0.8	0	0	5	0	0	3	0	0	15	0	0.631579	4	5	0.8	3	5	0.6	5	9	0.555556
chr1	115835983	+	A	chr1:115835983	Cntnap5a	.	Intron	intron_variant	0	0	-	-	-	-	ADAR	0.333333	0	2	0	1	5	0.2	3	5	0.6	0	0	5	0	0	6	0	0	19	0	0.190476	0	4	0	4	8	0.5	0	9	0
chr1	115837118	+	A	chr1:115837118	Cntnap5a	.	Intron	intron_variant	0	0	115836043	1075	upstream	intronic	ADAR	0.26087	1	7	0.142857	1	7	0.142857	4	9	0.444444	0	0	6	0	0	2	0	0	19	0	0.0294118	1	13	0.0769231	0	9	0	0	12	0
chr1	115837270	+	A	chr1:115837270	Cntnap5a	.	Intron	intron_variant	0	0	115835892	1378	upstream	intronic	ADAR	0.4375	1	13	0.0769231	6	7	0.857143	7	12	0.583333	0	0	2	0	0	12	0	0	19	0	0.105263	1	10	0.1	0	6	0	3	22	0.136364
chr1	115837271	+	A	chr1:115837271	Cntnap5a	.	Intron	intron_variant	0	0	115835891	1380	upstream	Intron	ADAR	0.366667	4	11	0.363636	2	7	0.285714	5	12	0.416667	0	0	2	0	0	12	0	0	14	0	0.0263158	1	11	0.0909091	0	6	0	0	21	0
chr1	115837277	+	A	chr1:115837277	Cntnap5a	.	Intron	intron_variant	0	0	-	-	-	-	ADAR	0.78125	9	13	0.692308	6	7	0.857143	10	12	0.833333	0	0	2	0	0	11	0	0	13	0	0.105263	0	10	0	1	6	0.166667	3	22	0.136364
chr1	115837285	+	A	chr1:115837285	Cntnap5a	.	Intron	intron_variant	0	0	-	-	-	-	ADARB1	0.724138	9	13	0.692308	4	6	0.666667	8	10	0.8	0	0	2	0	0	9	0	0	11	0	0	0	11	0	0	6	0	0	21	0
chr1	115837306	+	A	chr1:115837306	Cntnap5a	.	Intron	intron_variant	0	0	-	-	-	-	ADARB1	0.0833333	1	11	0.0909091	0	5	0	1	8	0.125	0	0	1	0	0	6	0	0	4	0	0	0	8	0	0	7	0	0	13	0
chr1	115837332	+	A	chr1:115837332	Cntnap5a	.	Intron	intron_variant	0	0	-	-	-	-	ADARB1	0.25	1	9	0.111111	3	5	0.6	1	6	0.166667	0	0	2	0	0	4	0	0	6	0	0	0	7	0	0	6	0	0	8	0
chr1	115868433	+	A	chr1:115868433	Cntnap5a	LINE	Intron	intron_variant	0	0	-	-	-	-	ADAR	0.294118	1	7	0.142857	3	3	1	1	7	0.142857	0	0	6	0	0	7	0	0	7	0	0.1	1	6	0.166667	0	3	0	0	1	0
chr1	115877143	+	A	chr1:115877143	Cntnap5a	LINE	Intron	intron_variant	0	0	-	-	-	-	ADARB1	0.142857	2	5	0.4	0	7	0	1	9	0.111111	0	0	3	0	0	3	0	0	12	0	0	0	1	0	0	3	0	0	2	0
chr1	115963932	+	A	chr1:115963932	Cntnap5a	LINE	Intron	intron_variant	0	0	-	-	-	-	ADAR	0.0833333	2	30	0.0666667	5	30	0.166667	0	24	0	0	0	22	0	0	23	0	0	13	0	0.125	0	7	0	0	4	0	3	13	0.230769
chr1	116109015	+	A	chr1:116109015	Cntnap5a	.	Intron	intron_variant	0	0	116109316	301	downstream	intronic	ADARB1	0.133333	1	5	0.2	0	4	0	1	6	0.166667	0	0	16	0	0	1	0	0	13	0	0	0	1	0	0	2	0	0	0	NA
chr1	116109051	+	A	chr1:116109051	Cntnap5a	.	Intron	intron_variant	0	0	116109280	229	downstream	intronic	ADARB1	0.2	0	4	0	1	5	0.2	2	6	0.333333	0	0	15	0	0	2	0	0	12	0	0	0	1	0	0	2	0	0	0	NA
chr1	116189464	+	A	chr1:116189464	Cntnap5a	SINE	Intron	intron_variant	0	0	116190080	616	downstream	intronic	ADARB1	0.444444	4	7	0.571429	2	7	0.285714	2	4	0.5	0	0	3	0	0	4	0	0	11	0	0	0	0	NA	0	1	0	0	1	0
chr1	11629190	+	A	chr1:11629190	A830018L16Rik	SINE	Intron	NMD_transcript_variant	0	0	-	-	-	-	ADARB1	0.119048	4	14	0.285714	1	16	0.0625	0	12	0	0	0	10	0	0	12	0	0	2	0	0	0	19	0	0	9	0	0	7	0
chr1	11639351	+	A	chr1:11639351	A830018L16Rik	LINE	Intron	NMD_transcript_variant	0	0	11638203	1148	upstream	intronic	ADARB1	0.333333	2	5	0.4	1	2	0.5	0	2	0	0	0	3	0	0	4	0	0	2	0	0	0	3	0	0	5	0	0	1	0
chr1	116425185	+	A	chr1:116425185	Cntnap5a	LTR	Intron	intron_variant	0	0	116427179	1994	downstream	intronic	ADARB1	0.25	2	6	0.333333	0	5	0	3	9	0.333333	0	0	14	0	0	12	0	0	6	0	0	0	1	0	0	0	NA	0	3	0
chr1	116467375	+	A	chr1:116467375	Cntnap5a	LINE	Intron	intron_variant	0	0	-	-	-	-	ADARB1	0.307692	3	11	0.272727	2	9	0.222222	3	6	0.5	0	0	7	0	0	16	0	0	6	0	0	0	5	0	0	2	0	0	0	NA
chr1	116467403	+	A	chr1:116467403	Cntnap5a	LINE	Intron	intron_variant	0	0	-	-	-	-	ADARB1	0.272727	4	9	0.444444	2	7	0.285714	0	6	0	0	0	8	0	0	15	0	0	14	0	0	0	5	0	0	2	0	0	0	NA
chr1	116467410	+	A	chr1:116467410	Cntnap5a	LINE	Intron	intron_variant	0	0	-	-	-	-	ADAR	0.478261	4	9	0.444444	3	7	0.428571	4	7	0.571429	0	0	8	0	0	17	0	0	4	0	0.285714	2	5	0.4	0	2	0	0	0	NA
chr1	116467427	+	A	chr1:116467427	Cntnap5a	LINE	Intron	intron_variant	0	0	-	-	-	-	ADAR	0.448276	4	10	0.4	5	12	0.416667	4	7	0.571429	0	0	8	0	0	17	0	0	20	0	0.166667	0	5	0	0	0	NA	1	1	1
chr1	116467466	+	A	chr1:116467466	Cntnap5a	LINE	Intron	intron_variant	0	0	-	-	-	-	ADARB1	0.363636	5	14	0.357143	6	12	0.5	1	7	0.142857	0	0	5	0	0	12	0	0	2	0	0	0	6	0	0	0	NA	0	1	0
chr1	116470007	+	A	chr1:116470007	Cntnap5a	LINE	Intron	intron_variant	0	0	-	-	-	-	ADARB1	0.136364	2	5	0.4	1	7	0.142857	0	10	0	0	0	5	0	0	8	0	0	3	0	0	0	6	0	0	0	NA	0	0	NA
chr1	116470049	+	A	chr1:116470049	Cntnap5a	LINE	Intron	intron_variant	0	0	-	-	-	-	ADARB1	0.133333	1	2	0.5	0	4	0	1	9	0.111111	0	0	4	0	0	4	0	0	4	0	0	0	4	0	0	0	NA	0	1	0
chr1	116473128	+	A	chr1:116473128	Cntnap5a	.	Intron	intron_variant	0	0	116474219	1091	downstream	intronic	ADARB1	0.580645	4	6	0.666667	5	6	0.833333	9	19	0.473684	0	0	11	0	0	8	0	0	13	0	0	0	3	0	0	1	0	0	2	0
chr1	116473132	+	A	chr1:116473132	Cntnap5a	.	Intron	intron_variant	0	0	116474215	1083	downstream	intronic	ADAR	0.678571	5	6	0.833333	4	5	0.8	10	17	0.588235	0	0	11	0	0	8	0	0	5	0	0.166667	0	3	0	0	1	0	1	2	0.5
chr1	116473156	+	A	chr1:116473156	Cntnap5a	.	Intron	intron_variant	0	0	116474190	1034	downstream	intronic	ADARB1	0.6	7	9	0.777778	4	6	0.666667	7	15	0.466667	0	0	8	0	0	6	0	0	8	0	0	0	3	0	0	1	0	0	2	0
chr1	116473158	+	A	chr1:116473158	Cntnap5a	.	Intron	intron_variant	0	0	116474188	1030	downstream	intronic	ADARB1	0.1	2	9	0.222222	0	6	0	1	15	0.0666667	0	0	7	0	0	6	0	0	8	0	0	0	3	0	0	1	0	0	2	0
chr1	116473164	+	A	chr1:116473164	Cntnap5a	.	Intron	intron_variant	0	0	116474181	1017	downstream	intronic	ADARB1	0.214286	2	9	0.222222	1	5	0.2	3	14	0.214286	0	0	6	0	0	5	0	0	9	0	0	0	3	0	0	1	0	0	2	0
chr1	116474189	+	A	chr1:116474189	Cntnap5a	.	Intron	intron_variant	0	0	116473157	1032	upstream	intronic	ADARB1	0.0714286	0	5	0	1	13	0.0769231	1	10	0.1	0	0	10	0	0	9	0	0	10	0	0	0	5	0	0	8	0	0	2	0
chr1	116474191	+	A	chr1:116474191	Cntnap5a	.	Intron	intron_variant	0	0	116473155	1036	upstream	intronic	ADAR	0.333333	2	5	0.4	4	12	0.333333	3	10	0.3	0	0	10	0	0	9	0	0	14	0	0.0625	1	5	0.2	0	9	0	0	2	0
chr1	116474197	+	A	chr1:116474197	Cntnap5a	.	Intron	intron_variant	0	0	116473149	1048	upstream	intronic	ADARB1	0.0833333	1	5	0.2	0	11	0	1	8	0.125	0	0	10	0	0	8	0	0	4	0	0	0	5	0	0	9	0	0	2	0
chr1	116479247	+	A	chr1:116479247	Cntnap5a	LINE	Intron	intron_variant	0	0	116478573	674	upstream	intronic	ADARB1	0.185185	3	5	0.6	0	4	0	2	18	0.111111	0	0	7	0	0	13	0	0	10	0	0	0	6	0	0	2	0	0	1	0
chr1	116479288	+	A	chr1:116479288	Cntnap5a	LINE	Intron	intron_variant	0	0	116478532	756	upstream	intronic	ADARB1	0.413793	5	8	0.625	2	7	0.285714	5	14	0.357143	0	0	9	0	0	17	0	0	11	0	0	0	7	0	0	4	0	0	1	0
chr1	11658181	+	A	chr1:11658181	A830018L16Rik	.	Intron	regulatory_region_variant	0	0	-	-	-	-	ADARB1	0.117647	2	11	0.181818	0	11	0	2	12	0.166667	0	0	9	0	0	12	0	0	6	0	0	0	7	0	0	6	0	0	4	0
chr1	11688622	+	A	chr1:11688622	A830018L16Rik	LINE	Intron	NMD_transcript_variant	0	0	-	-	-	-	ADARB1	0.142857	0	6	0	2	9	0.222222	1	6	0.166667	0	0	2	0	0	2	0	0	7	0	0	0	0	NA	0	5	0	0	4	0
chr1	118298368	-	T	chr1:118298368	Tsn	SINE	UTR	3_prime_UTR_variant	0	0	-	-	-	-	ADARB1	0.102564	2	11	0.181818	0	11	0	2	17	0.117647	0	0	48	0	0	23	0	0	11	0	0	0	6	0	0	1	0	0	8	0
chr1	118302731	-	T	chr1:118302731	Tsn	SINE	Intron	non_coding_transcript_variant	0	0	118302118	613	downstream	intronic	ADAR	0.0813953	2	33	0.0606061	1	26	0.0384615	4	27	0.148148	0	0	39	0	0	43	0	0	11	0	0.075	0	10	0	0	11	0	3	19	0.157895
chr1	118303063	-	T	chr1:118303063	Tsn	LTR	Intron	non_coding_transcript_variant	0	0	118303408	345	upstream	intronic	ADAR	0.0394737	2	17	0.117647	1	29	0.0344828	0	30	0	0	0	26	0	0	29	0	0	8	0	0.0185185	0	16	0	1	19	0.0526316	0	19	0
chr1	118303409	-	T	chr1:118303409	Tsn	SINE	Intron	non_coding_transcript_variant	0	0	118303062	347	downstream	intronic	ADARB1	0.06	2	28	0.0714286	2	32	0.0625	2	40	0.05	0	0	50	0	0	49	0	0	9	0	0	0	13	0	0	14	0	0	20	0
chr1	118398073	+	A	chr1:118398073	Clasp1	SINE	Intron	non_coding_transcript_variant	0	0	118397054	1019	upstream	intronic	ADARB1	0.0840336	1	38	0.0263158	5	27	0.185185	4	54	0.0740741	0	0	24	0	0	38	0	0	9	0	0	0	9	0	0	6	0	0	6	0
chr1	118424555	+	A	chr1:118424555	Clasp1	LTR	Intron	non_coding_transcript_variant	0	0	118426969	2414	downstream	intronic	ADARB1	0.0327869	1	50	0.02	0	34	0	3	38	0.0789474	0	0	31	0	0	17	0	0	9	0	0	0	22	0	0	16	0	0	22	0
chr1	118426972	+	A	chr1:118426972	Clasp1	LTR	Intron	non_coding_transcript_variant	0	0	118424552	2420	upstream	intronic	ADARB1	0.047619	2	51	0.0392157	0	28	0	3	26	0.115385	0	0	16	0	0	28	0	0	20	0	0	0	10	0	0	10	0	0	8	0
chr1	118437430	+	A	chr1:118437430	Clasp1	SINE	Intron	non_coding_transcript_variant	0	0	118439258	1828	downstream	intronic	ADAR	0.171975	10	69	0.144928	7	49	0.142857	10	39	0.25641	0	0	35	0	0	39	0	0	20	0	0.0365854	1	22	0.0454545	2	31	0.0645161	0	29	0
chr1	118437484	+	A	chr1:118437484	Clasp1	SINE	Intron	non_coding_transcript_variant	0	0	118439204	1720	downstream	intronic	ADARB1	0.0561798	3	33	0.0909091	1	27	0.037037	1	29	0.0344828	0	0	31	0	0	30	0	0	28	0	0	0	10	0	0	15	0	0	18	0
chr1	118472846	+	A	chr1:118472846	Clasp1	SINE	Intron	regulatory_region_variant	0	0	-	-	-	-	ADAR	0.0833333	1	20	0.05	2	23	0.0869565	3	29	0.103448	0	0	89	0	0	23	0	0	37	0	0.0333333	0	10	0	0	11	0	1	9	0.111111
chr1	118494870	+	A	chr1:118494870	Clasp1	SINE	Intron	regulatory_region_variant	0	0	-	-	-	-	ADARB1	0.12069	2	24	0.0833333	1	12	0.0833333	4	22	0.181818	0	0	20	0	0	20	0	0	34	0	0	0	3	0	0	11	0	0	5	0
chr1	118548106	+	A	chr1:118548106	Clasp1	SINE	Intron	non_coding_transcript_variant	0	0	-	-	-	-	ADARB1	0.0536913	0	41	0	7	53	0.132075	1	55	0.0181818	0	0	38	0	0	61	0	0	53	0	0	0	17	0	0	15	0	0	10	0
chr1	118548872	+	A	chr1:118548872	Clasp1	.	Intron	non_coding_transcript_variant	0	0	-	-	-	-	ADARB1	0.121951	2	15	0.133333	5	30	0.166667	3	37	0.0810811	0	0	25	0	0	33	0	0	30	0	0	0	11	0	0	13	0	0	12	0
chr1	118549325	+	A	chr1:118549325	Clasp1	.	Intron	non_coding_transcript_variant	0	0	118548901	424	upstream	intronic	ADARB1	0.0526316	2	22	0.0909091	0	16	0	1	19	0.0526316	0	0	25	0	0	20	0	0	9	0	0	0	6	0	0	11	0	0	9	0
chr1	118549359	+	A	chr1:118549359	Clasp1	.	Intron	non_coding_transcript_variant	0	0	-	-	-	-	ADARB1	0.388889	3	9	0.333333	6	14	0.428571	5	13	0.384615	0	0	15	0	0	13	0	0	19	0	0	0	10	0	0	8	0	0	13	0
chr1	118552779	+	A	chr1:118552779	Clasp1	SINE	Intron	non_coding_transcript_variant	0	0	118553386	607	downstream	intronic	ADAR	0.133333	3	22	0.136364	3	9	0.333333	0	14	0	0	0	25	0	0	16	0	0	22	0	0.148148	3	9	0.333333	0	9	0	1	9	0.111111
chr1	118571362	+	A	chr1:118571362	Clasp1	SINE	Intron	regulatory_region_variant	0	0	-	-	-	-	ADAR	0.106719	11	85	0.129412	6	84	0.0714286	10	84	0.119048	0	0	67	0	0	75	0	0	15	0	0.0108696	1	32	0.03125	0	42	0	0	18	0
chr1	118574296	+	A	chr1:118574296	Clasp1	LTR	Intron	non_coding_transcript_variant	0	0	118575090	794	downstream	intronic	ADAR	0.139665	3	47	0.0638298	11	61	0.180328	11	71	0.15493	0	0	74	0	0	77	0	0	26	0	0.031746	0	20	0	1	19	0.0526316	1	24	0.0416667
chr1	118574300	+	A	chr1:118574300	Clasp1	LTR	Intron	non_coding_transcript_variant	0	0	-	-	-	-	ADAR	0.0955056	6	47	0.12766	8	63	0.126984	3	68	0.0441176	0	0	75	0	0	78	0	0	16	0	0.0441176	2	20	0.1	1	23	0.0434783	0	25	0
chr1	118574314	+	A	chr1:118574314	Clasp1	LTR	Intron	non_coding_transcript_variant	0	0	-	-	-	-	ADAR	0.451429	18	50	0.36	30	60	0.5	31	65	0.476923	0	0	70	0	0	77	0	0	65	0	0.115942	3	23	0.130435	4	23	0.173913	1	23	0.0434783
chr1	118574336	+	A	chr1:118574336	Clasp1	LTR	Intron	non_coding_transcript_variant	0	0	-	-	-	-	ADAR	0.125654	3	52	0.0576923	10	69	0.144928	11	70	0.157143	0	0	79	0	0	82	0	0	42	0	0.0144928	0	25	0	1	21	0.047619	0	23	0
chr1	118574841	+	A	chr1:118574841	Clasp1	SINE	Intron	non_coding_transcript_variant	0	0	-	-	-	-	ADAR	0.0792079	2	74	0.027027	5	55	0.0909091	9	73	0.123288	0	0	86	0	0	70	0	0	35	0	0.0151515	0	30	0	0	19	0	1	17	0.0588235
chr1	118574860	+	A	chr1:118574860	Clasp1	SINE	Intron	non_coding_transcript_variant	0	0	-	-	-	-	ADARB1	0.0820513	2	74	0.027027	6	60	0.1	8	61	0.131148	0	0	88	0	0	66	0	0	20	0	0	0	33	0	0	18	0	0	14	0
chr1	118576168	+	A	chr1:118576168	Clasp1	SINE	Intron	non_coding_transcript_variant	0	0	-	-	-	-	ADARB1	0.0633803	0	48	0	5	40	0.125	4	54	0.0740741	0	0	40	0	0	50	0	0	21	0	0	0	25	0	0	18	0	0	22	0
chr1	118576224	+	A	chr1:118576224	Clasp1	SINE	Intron	non_coding_transcript_variant	0	0	118577483	1259	downstream	intronic	ADARB1	0.032967	3	61	0.0491803	1	54	0.0185185	2	67	0.0298507	0	0	59	0	0	87	0	0	104	0	0	0	27	0	0	20	0	0	21	0
chr1	118577415	+	A	chr1:118577415	Clasp1	LTR	Intron	non_coding_transcript_variant	0	0	-	-	-	-	ADARB1	0.049505	1	30	0.0333333	1	31	0.0322581	3	40	0.075	0	0	45	0	0	41	0	0	59	0	0	0	14	0	0	22	0	0	12	0
chr1	11863101	+	A	chr1:11863101	A830018L16Rik	LTR	Intron	NMD_transcript_variant	0	0	-	-	-	-	ADARB1	0.444444	5	12	0.416667	10	25	0.4	5	8	0.625	0	0	10	0	0	7	0	0	15	0	0	0	11	0	0	3	0	0	4	0
chr1	11863104	+	A	chr1:11863104	A830018L16Rik	LTR	Intron	NMD_transcript_variant	0	0	-	-	-	-	ADAR	0.586957	8	12	0.666667	14	26	0.538462	5	8	0.625	0	0	10	0	0	7	0	0	16	0	0.333333	1	11	0.0909091	3	3	1	2	4	0.5
chr1	11863109	+	A	chr1:11863109	A830018L16Rik	LTR	Intron	NMD_transcript_variant	0	0	-	-	-	-	ADARB1	0.130435	0	12	0	4	26	0.153846	2	8	0.25	0	0	11	0	0	9	0	0	18	0	0	0	11	0	0	3	0	0	4	0
chr1	11863452	+	A	chr1:11863452	A830018L16Rik	LTR	Intron	NMD_transcript_variant	0	0	11863118	334	upstream	intronic	ADARB1	0.105882	0	28	0	2	25	0.08	7	32	0.21875	0	0	17	0	0	12	0	0	9	0	0	0	10	0	0	8	0	0	6	0
chr1	11863488	+	A	chr1:11863488	A830018L16Rik	LTR	Intron	NMD_transcript_variant	0	0	-	-	-	-	ADAR	0.0365854	1	26	0.0384615	1	25	0.04	1	31	0.0322581	0	0	17	0	0	18	0	0	11	0	0.0384615	1	11	0.0909091	0	9	0	0	6	0
chr1	11863489	+	A	chr1:11863489	A830018L16Rik	LTR	Intron	NMD_transcript_variant	0	0	-	-	-	-	ADAR	0.35	9	24	0.375	11	24	0.458333	8	32	0.25	0	0	17	0	0	18	0	0	11	0	0.04	1	10	0.1	0	9	0	0	6	0
chr1	11917441	+	A	chr1:11917441	A830018L16Rik	SINE	Intron	NMD_transcript_variant	0	0	-	-	-	-	ADAR	0.894737	8	8	1	1	3	0.333333	8	8	1	0	0	2	0	0	6	0	0	3	0	0.375	0	2	0	3	4	0.75	0	2	0
chr1	11917445	+	A	chr1:11917445	A830018L16Rik	SINE	Intron	NMD_transcript_variant	0	0	-	-	-	-	ADAR	0.6875	5	6	0.833333	1	3	0.333333	5	7	0.714286	0	0	2	0	0	7	0	0	3	0	0.5	0	2	0	4	4	1	0	2	0
chr1	119425541	+	A	chr1:119425541	Inhbb	SINE	intergenic	upstream_gene_variant	0	0	-	-	-	-	ADARB1	0.181818	0	4	0	2	7	0.285714	2	11	0.181818	0	0	3	0	0	12	0	0	58	0	0	0	2	0	0	2	0	0	0	NA
chr1	119427119	+	A	chr1:119427119	Inhbb	SINE	intergenic	upstream_gene_variant	0	0	119428308	1189	downstream	undefined	ADARB1	0.571429	2	3	0.666667	3	4	0.75	3	7	0.428571	0	0	1	0	0	6	0	0	56	0	0	0	2	0	0	0	NA	0	2	0
chr1	119427138	+	A	chr1:119427138	Inhbb	SINE	intergenic	upstream_gene_variant	0	0	-	-	-	-	ADARB1	0.1875	0	3	0	2	5	0.4	1	8	0.125	0	0	1	0	0	6	0	0	70	0	0	0	2	0	0	0	NA	0	1	0
chr1	119427140	+	A	chr1:119427140	Inhbb	SINE	intergenic	upstream_gene_variant	0	0	-	-	-	-	ADARB1	0.235294	0	3	0	2	6	0.333333	2	8	0.25	0	0	1	0	0	6	0	0	90	0	0	0	3	0	0	0	NA	0	1	0
chr1	119428574	+	A	chr1:119428574	-	.	intergenic	intergenic_variant	0	0	-	-	-	-	ADARB1	0.153846	1	3	0.333333	1	2	0.5	0	8	0	0	0	9	0	0	4	0	0	82	0	0	0	1	0	0	1	0	0	2	0
chr1	119428588	+	A	chr1:119428588	-	.	intergenic	intergenic_variant	0	0	-	-	-	-	ADARB1	0.5	0	2	0	1	2	0.5	5	8	0.625	0	0	5	0	0	4	0	0	48	0	0	0	1	0	0	1	0	0	2	0
chr1	119516044	-	T	chr1:119516044	Gm27184	LTR	intergenic	downstream_gene_variant	0	0	-	-	-	-	ADARB1	0.25	3	5	0.6	1	3	0.333333	0	8	0	0	0	0	NA	0	1	0	0	54	0	0	0	1	0	0	3	0	0	2	0
chr1	119542747	-	T	chr1:119542747	Epb41l5	SINE	intergenic	regulatory_region_variant	0	0	119541019	1728	downstream	intergenic	ADAR	0.178571	2	8	0.25	0	4	0	3	16	0.1875	0	0	10	0	0	9	0	0	36	0	1	0	0	NA	0	0	NA	2	2	1
chr1	119586720	-	T	chr1:119586720	Epb41l5	LTR	Intron	non_coding_transcript_variant	0	0	119588198	1478	upstream	intronic	ADAR	0.117647	1	25	0.04	3	15	0.2	2	11	0.181818	0	0	14	0	0	8	0	0	8	0	0.153846	2	5	0.4	0	1	0	0	7	0
chr1	119587983	-	T	chr1:119587983	Epb41l5	LTR	Intron	non_coding_transcript_variant	0	0	-	-	-	-	ADARB1	0.121951	3	11	0.272727	0	15	0	2	15	0.133333	0	0	37	0	0	15	0	0	4	0	0	0	8	0	0	6	0	0	2	0
chr1	119588184	-	T	chr1:119588184	Epb41l5	LTR	Intron	non_coding_transcript_variant	0	0	119586727	1457	downstream	intronic	ADARB1	0.12069	3	27	0.111111	0	9	0	4	22	0.181818	0	0	20	0	0	25	0	0	3	0	0	0	7	0	0	6	0	0	1	0
chr1	119588207	-	T	chr1:119588207	Epb41l5	LTR	Intron	non_coding_transcript_variant	0	0	119586703	1504	downstream	intronic	ADARB1	0.0634921	2	27	0.0740741	0	8	0	2	28	0.0714286	0	0	21	0	0	24	0	0	4	0	0	0	7	0	0	7	0	0	2	0
chr1	119588235	-	T	chr1:119588235	Epb41l5	LTR	Intron	non_coding_transcript_variant	0	0	119586676	1559	downstream	intronic	ADARB1	0.0454545	1	29	0.0344828	1	12	0.0833333	1	25	0.04	0	0	23	0	0	21	0	0	6	0	0	0	8	0	0	10	0	0	2	0
chr1	119603453	-	T	chr1:119603453	Epb41l5	SINE	Intron	intron_variant	0	0	119604360	907	upstream	intronic	ADARB1	0.151515	2	12	0.166667	0	7	0	3	14	0.214286	0	0	22	0	0	19	0	0	6	0	0	0	4	0	0	6	0	0	9	0
chr1	119603454	-	T	chr1:119603454	Epb41l5	SINE	Intron	intron_variant	0	0	119604359	905	upstream	intronic	ADARB1	0.114286	1	12	0.0833333	0	7	0	3	16	0.1875	0	0	23	0	0	20	0	0	3	0	0	0	4	0	0	7	0	0	9	0
chr1	119604360	-	T	chr1:119604360	Epb41l5	SINE	Intron	intron_variant	0	0	119603453	907	downstream	intronic	ADAR	0.0810811	2	15	0.133333	0	13	0	1	9	0.111111	0	0	22	0	0	23	0	0	6	0	0.1	1	3	0.333333	0	5	0	0	2	0
chr1	11960866	+	A	chr1:11960866	A830018L16Rik	LINE	Intron	intron_variant	0	0	-	-	-	-	ADARB1	0.0909091	1	7	0.142857	1	11	0.0909091	0	4	0	0	0	1	0	0	6	0	0	3	0	0	0	4	0	0	3	0	0	1	0
chr1	119664205	-	T	chr1:119664205	Ptpn4	SINE	Intron	NMD_transcript_variant	0	0	119664873	668	upstream	intronic	ADARB1	0.290323	2	10	0.2	3	10	0.3	4	11	0.363636	0	0	8	0	0	7	0	0	12	0	0	0	5	0	0	9	0	0	3	0
chr1	119685609	-	T	chr1:119685609	Ptpn4	SINE	Intron	NMD_transcript_variant	0	0	119684153	1456	downstream	intronic	ADARB1	0.0485437	2	32	0.0625	0	39	0	3	32	0.09375	0	0	60	0	0	40	0	0	19	0	0	0	46	0	0	30	0	0	29	0
chr1	119715460	-	T	chr1:119715460	Ptpn4	SINE	Intron	non_coding_transcript_variant	0	0	-	-	-	-	ADAR	0.142857	3	15	0.2	4	27	0.148148	0	7	0	0	0	26	0	0	19	0	0	13	0	0.030303	0	8	0	0	10	0	1	15	0.0666667
chr1	119715614	-	T	chr1:119715614	Ptpn4	SINE	Intron	non_coding_transcript_variant	0	0	-	-	-	-	ADARB1	0.166667	2	11	0.181818	2	11	0.181818	2	14	0.142857	0	0	18	0	0	19	0	0	13	0	0	0	7	0	0	15	0	0	9	0
chr1	119719900	-	T	chr1:119719900	Ptpn4	SINE	Intron	NMD_transcript_variant	0	0	-	-	-	-	ADAR	0.28	7	13	0.538462	5	25	0.2	2	12	0.166667	0	0	21	0	0	12	0	0	15	0	0.0454545	3	36	0.0833333	0	17	0	0	13	0
chr1	119721718	-	T	chr1:119721718	Ptpn4	SINE	Intron	NMD_transcript_variant	0	0	119720880	838	downstream	intronic	ADARB1	0.135922	4	39	0.102564	6	23	0.26087	4	41	0.097561	0	0	31	0	0	25	0	0	10	0	0	0	35	0	0	37	0	0	31	0
chr1	119721754	-	T	chr1:119721754	Ptpn4	SINE	Intron	NMD_transcript_variant	0	0	119722663	909	upstream	Intron	ADARB1	0.235955	6	33	0.181818	6	25	0.24	9	31	0.290323	0	0	26	0	0	26	0	0	10	0	0	0	31	0	0	36	0	0	29	0
chr1	119721755	-	T	chr1:119721755	Ptpn4	SINE	Intron	NMD_transcript_variant	0	0	119720842	913	downstream	intronic	ADAR	0.170455	3	35	0.0857143	3	24	0.125	9	29	0.310345	0	0	26	0	0	24	0	0	19	0	0.0210526	0	31	0	2	37	0.0540541	0	27	0
chr1	119770692	-	T	chr1:119770692	Ptpn4	LINE	Intron	NMD_transcript_variant	0	0	-	-	-	-	ADAR	0.25	14	60	0.233333	24	86	0.27907	23	98	0.234694	0	0	148	0	0	102	0	0	17	0	0.212121	8	44	0.181818	8	38	0.210526	12	50	0.24
chr1	119770747	-	T	chr1:119770747	Ptpn4	LINE	Intron	NMD_transcript_variant	0	0	119771464	717	upstream	intronic	ADAR	0.297398	20	61	0.327869	21	89	0.235955	39	119	0.327731	0	0	162	0	0	99	0	0	59	0	0.00694444	1	46	0.0217391	0	38	0	0	60	0
chr1	119770758	-	T	chr1:119770758	Ptpn4	LINE	Intron	NMD_transcript_variant	0	0	119771453	695	upstream	intronic	ADAR	0.112281	7	59	0.118644	9	94	0.0957447	16	132	0.121212	0	0	165	0	0	101	0	0	14	0	0.0409836	2	36	0.0555556	0	35	0	3	51	0.0588235
chr1	119770786	-	T	chr1:119770786	Ptpn4	LINE	Intron	NMD_transcript_variant	0	0	119771425	639	upstream	intronic	ADARB1	0.0709677	5	68	0.0735294	7	100	0.07	10	142	0.0704225	0	0	165	0	0	100	0	0	10	0	0	0	39	0	0	39	0	0	55	0
chr1	119770787	-	T	chr1:119770787	Ptpn4	LINE	Intron	NMD_transcript_variant	0	0	119771424	637	upstream	intronic	ADARB1	0.0291262	4	66	0.0606061	4	100	0.04	1	143	0.00699301	0	0	162	0	0	102	0	0	14	0	0	0	41	0	0	39	0	0	54	0
chr1	119771395	-	T	chr1:119771395	Ptpn4	LINE	Intron	NMD_transcript_variant	0	0	119770816	579	downstream	intronic	ADAR	0.111111	3	87	0.0344828	11	79	0.139241	15	95	0.157895	0	0	126	0	0	80	0	0	23	0	0.00740741	1	54	0.0185185	0	41	0	0	40	0
chr1	119771396	-	T	chr1:119771396	Ptpn4	LINE	Intron	NMD_transcript_variant	0	0	119770815	581	downstream	intronic	ADARB1	0.0863309	4	90	0.0444444	10	88	0.113636	10	100	0.1	0	0	131	0	0	83	0	0	18	0	0	0	51	0	0	42	0	0	40	0
chr1	119771421	-	T	chr1:119771421	Ptpn4	LINE	Intron	NMD_transcript_variant	0	0	119770790	631	downstream	intronic	ADAR	0.0659026	6	110	0.0545455	11	113	0.0973451	6	126	0.047619	0	0	171	0	0	108	0	0	17	0	0.00662252	1	58	0.0172414	0	48	0	0	45	0
chr1	119771448	-	T	chr1:119771448	Ptpn4	LINE	Intron	NMD_transcript_variant	0	0	119770763	685	downstream	intronic	ADARB1	0.386792	28	95	0.294737	56	112	0.5	39	111	0.351351	0	0	165	0	0	120	0	0	91	0	0	0	64	0	0	48	0	0	42	0
chr1	119771458	-	T	chr1:119771458	Ptpn4	LINE	Intron	NMD_transcript_variant	0	0	119770753	705	downstream	intronic	ADAR	0.0649351	4	94	0.0425532	8	110	0.0727273	8	104	0.0769231	0	0	163	0	0	105	0	0	98	0	0.00684932	1	56	0.0178571	0	48	0	0	42	0
chr1	119771461	-	T	chr1:119771461	Ptpn4	LINE	Intron	NMD_transcript_variant	0	0	119770750	711	downstream	intronic	ADARB1	0.126623	12	91	0.131868	12	112	0.107143	15	105	0.142857	0	0	164	0	0	106	0	0	91	0	0	0	62	0	0	46	0	0	47	0
chr1	119771463	-	T	chr1:119771463	Ptpn4	LINE	Intron	NMD_transcript_variant	0	0	119770748	715	downstream	intronic	ADARB1	0.0693069	7	89	0.0786517	2	113	0.0176991	12	101	0.118812	0	0	165	0	0	102	0	0	78	0	0	0	53	0	0	42	0	0	44	0
chr1	119771466	-	T	chr1:119771466	Ptpn4	LINE	Intron	NMD_transcript_variant	0	0	119770745	721	downstream	intronic	ADAR	0.0784314	13	91	0.142857	5	113	0.0442478	6	102	0.0588235	0	0	166	0	0	103	0	0	77	0	0.00714286	0	52	0	1	44	0.0227273	0	44	0
chr1	119773756	-	T	chr1:119773756	Ptpn4	.	Intron	NMD_transcript_variant	0	0	-	-	-	-	ADAR	0.122137	2	14	0.142857	6	46	0.130435	8	71	0.112676	0	0	48	0	0	40	0	0	56	0	0.0252101	1	40	0.025	1	42	0.0238095	1	37	0.027027
chr1	119773849	-	T	chr1:119773849	Ptpn4	.	Intron	NMD_transcript_variant	0	0	119775404	1555	upstream	intronic	ADARB1	0.0233645	1	71	0.0140845	1	61	0.0163934	3	82	0.0365854	0	0	82	0	0	50	0	0	63	0	0	0	36	0	0	38	0	0	43	0
chr1	119775358	-	T	chr1:119775358	Ptpn4	.	Intron	NMD_transcript_variant	0	0	119773895	1463	downstream	intronic	ADARB1	0.047619	1	29	0.0344828	3	74	0.0405405	4	65	0.0615385	0	0	57	0	0	40	0	0	82	0	0	0	44	0	0	43	0	0	28	0
chr1	119775361	-	T	chr1:119775361	Ptpn4	.	Intron	NMD_transcript_variant	0	0	-	-	-	-	ADAR	0.0421687	0	29	0	5	71	0.0704225	2	66	0.030303	0	0	53	0	0	38	0	0	89	0	0.0169492	2	45	0.0444444	0	45	0	0	28	0
chr1	119775405	-	T	chr1:119775405	Ptpn4	.	Intron	NMD_transcript_variant	0	0	119773848	1557	downstream	intronic	ADARB1	0.130435	4	21	0.190476	5	51	0.0980392	6	43	0.139535	0	0	39	0	0	29	0	0	87	0	0	0	46	0	0	51	0	0	26	0
chr1	119775412	-	T	chr1:119775412	Ptpn4	.	Intron	NMD_transcript_variant	0	0	119773841	1571	downstream	intronic	ADARB1	0.0792079	1	23	0.0434783	5	43	0.116279	2	35	0.0571429	0	0	35	0	0	28	0	0	90	0	0	0	51	0	0	50	0	0	28	0
chr1	119776080	-	T	chr1:119776080	Ptpn4	SINE	Intron	NMD_transcript_variant	0	0	-	-	-	-	ADARB1	0.0271186	1	124	0.00806452	4	100	0.04	3	71	0.0422535	0	0	99	0	0	71	0	0	87	0	0	0	37	0	0	48	0	0	41	0
chr1	119810859	-	T	chr1:119810859	Ptpn4	LTR	Intron	NMD_transcript_variant	0	0	119811576	717	upstream	intronic	ADARB1	0.0416667	1	9	0.111111	0	10	0	1	29	0.0344828	0	0	11	0	0	12	0	0	86	0	0	0	8	0	0	7	0	0	10	0
chr1	119810987	-	T	chr1:119810987	Ptpn4	LTR	Intron	NMD_transcript_variant	0	0	119811464	477	upstream	intronic	ADARB1	0.0538462	0	45	0	2	39	0.0512821	5	46	0.108696	0	0	37	0	0	28	0	0	38	0	0	0	10	0	0	4	0	0	18	0
chr1	119810999	-	T	chr1:119810999	Ptpn4	LTR	Intron	NMD_transcript_variant	0	0	119811452	453	upstream	intronic	ADAR	0.122807	4	45	0.0888889	6	30	0.2	4	39	0.102564	0	0	30	0	0	25	0	0	40	0	0.137931	4	8	0.5	0	3	0	0	18	0
chr1	119811023	-	T	chr1:119811023	Ptpn4	LTR	Intron	NMD_transcript_variant	0	0	119811428	405	upstream	intronic	ADARB1	0.0652174	4	41	0.097561	0	27	0	2	24	0.0833333	0	0	26	0	0	18	0	0	33	0	0	0	6	0	0	3	0	0	17	0
chr1	119811058	-	T	chr1:119811058	Ptpn4	LTR	Intron	NMD_transcript_variant	0	0	119811373	315	upstream	intronic	ADARB1	0.113208	5	27	0.185185	0	14	0	1	12	0.0833333	0	0	20	0	0	14	0	0	33	0	0	0	4	0	0	2	0	0	12	0
chr1	119811073	-	T	chr1:119811073	Ptpn4	LTR	Intron	NMD_transcript_variant	0	0	119811357	284	upstream	intronic	ADARB1	0.0508475	1	27	0.037037	0	19	0	2	13	0.153846	0	0	17	0	0	13	0	0	14	0	0	0	5	0	0	3	0	0	12	0
chr1	119811082	-	T	chr1:119811082	Ptpn4	LTR	Intron	NMD_transcript_variant	0	0	119811356	274	upstream	intronic	ADARB1	0.237288	3	24	0.125	6	22	0.272727	5	13	0.384615	0	0	17	0	0	13	0	0	13	0	0	0	4	0	0	4	0	0	10	0
chr1	119811577	-	T	chr1:119811577	Ptpn4	LTR	Intron	NMD_transcript_variant	0	0	119810858	719	downstream	intronic	ADARB1	0.15	4	26	0.153846	3	15	0.2	2	19	0.105263	0	0	10	0	0	19	0	0	52	0	0	0	12	0	0	10	0	0	2	0
chr1	119822606	-	T	chr1:119822606	Gm8338,Ptpn4	SINE	Intron	NMD_transcript_variant	0	0	119824310	1704	upstream	intronic	ADARB1	0.111111	0	22	0	4	16	0.25	4	34	0.117647	0	0	31	0	0	10	0	0	20	0	0	0	18	0	0	21	0	0	12	0
chr1	120168044	+	A	chr1:120168044	3110009E18Rik	SINE	Intron	non_coding_transcript_variant	0	0	120167264	780	upstream	intronic	ADARB1	0.241379	2	8	0.25	1	7	0.142857	4	14	0.285714	0	0	2	0	0	3	0	0	48	0	0	0	2	0	0	2	0	0	3	0
chr1	120168050	+	A	chr1:120168050	3110009E18Rik	SINE	Intron	non_coding_transcript_variant	0	0	120167257	793	upstream	intronic	ADARB1	0.310345	2	8	0.25	3	7	0.428571	4	14	0.285714	0	0	2	0	0	3	0	0	41	0	0	0	2	0	0	2	0	0	2	0
chr1	121283206	-	T	chr1:121283206	-	SINE	intergenic	intergenic_variant	0	0	-	-	-	-	ADAR	0.545455	3	7	0.428571	6	9	0.666667	9	17	0.529412	0	0	8	0	0	11	0	0	36	0	0.478261	3	4	0.75	4	8	0.5	4	11	0.363636
chr1	121284094	-	T	chr1:121284094	-	LTR	intergenic	intergenic_variant	0	0	-	-	-	-	ADARB1	0.0909091	3	15	0.2	1	14	0.0714286	0	15	0	0	0	12	0	0	7	0	0	23	0	0	0	9	0	0	5	0	0	3	0
chr1	121284156	-	T	chr1:121284156	-	LTR	intergenic	intergenic_variant	0	0	-	-	-	-	ADARB1	0.0923077	3	22	0.136364	1	23	0.0434783	2	20	0.1	0	0	16	0	0	12	0	0	22	0	0	0	8	0	0	6	0	0	1	0
chr1	121285066	-	T	chr1:121285066	-	SINE	intergenic	intergenic_variant	0	0	-	-	-	-	ADAR	0.0566038	1	22	0.0454545	0	14	0	2	17	0.117647	0	0	12	0	0	12	0	0	24	0	0.0434783	1	9	0.111111	0	9	0	0	5	0
chr1	121285080	-	T	chr1:121285080	-	SINE	intergenic	intergenic_variant	0	0	-	-	-	-	ADARB1	0.31746	6	21	0.285714	7	20	0.35	7	22	0.318182	0	0	12	0	0	13	0	0	22	0	0	0	9	0	0	10	0	0	5	0
chr1	121287555	-	T	chr1:121287555	-	SINE	intergenic	intergenic_variant	0	0	-	-	-	-	ADARB1	0.0625	2	30	0.0666667	2	24	0.0833333	1	26	0.0384615	0	0	16	0	0	17	0	0	20	0	0	0	7	0	0	11	0	0	8	0
chr1	121308885	-	T	chr1:121308885	Insig2	SINE	Intron	non_coding_transcript_variant	0	0	121309340	455	upstream	intronic	ADAR	0.321429	6	20	0.3	5	14	0.357143	7	22	0.318182	0	0	17	0	0	14	0	0	5	0	0.166667	2	8	0.25	1	6	0.166667	0	4	0
chr1	121313357	-	T	chr1:121313357	Insig2	SINE	Intron	non_coding_transcript_variant	0	0	-	-	-	-	ADARB1	0.0503145	2	50	0.04	1	50	0.02	5	59	0.0847458	0	0	34	0	0	49	0	0	5	0	0	0	9	0	0	6	0	0	21	0
chr1	121449993	+	A	chr1:121449993	Ccdc93	LTR	Intron	intron_variant	0	0	-	-	-	-	ADARB1	0.0576923	3	29	0.103448	0	33	0	3	42	0.0714286	0	0	58	0	0	52	0	0	1	0	0	0	16	0	0	19	0	0	18	0
chr1	121450018	+	A	chr1:121450018	Ccdc93	LTR	Intron	intron_variant	0	0	-	-	-	-	ADAR	0.112245	2	24	0.0833333	1	30	0.0333333	8	44	0.181818	0	0	44	0	0	46	0	0	6	0	0.130435	1	16	0.0625	2	19	0.105263	3	11	0.272727
chr1	121565135	-	T	chr1:121565135	Ddx18	SINE	Intron	non_coding_transcript_variant	0	0	121564886	249	downstream	intronic	ADARB1	0.12	2	12	0.166667	1	5	0.2	0	8	0	0	0	5	0	0	10	0	0	10	0	0	0	1	0	0	6	0	0	1	0
chr1	123381354	-	T	chr1:123381354	Dpp10	.	Intron	intron_variant	0	0	-	-	-	-	ADARB1	0.0697674	2	9	0.222222	1	17	0.0588235	0	17	0	0	0	14	0	0	19	0	0	9	0	0	0	15	0	0	21	0	0	12	0
chr1	123424589	-	T	chr1:123424589	Dpp10	.	Intron	regulatory_region_variant	0	0	-	-	-	-	ADAR	0.407407	3	4	0.75	2	5	0.4	6	18	0.333333	0	0	11	0	0	13	0	0	9	0	0.125	3	14	0.214286	0	9	0	1	9	0.111111
chr1	123424597	-	T	chr1:123424597	Dpp10	.	Intron	regulatory_region_variant	0	0	123425235	638	upstream	intronic	ADARB1	0.148148	0	3	0	2	6	0.333333	2	18	0.111111	0	0	10	0	0	13	0	0	16	0	0	0	11	0	0	6	0	0	6	0
chr1	123424608	-	T	chr1:123424608	Dpp10	.	Intron	regulatory_region_variant	0	0	123425224	616	upstream	intronic	ADARB1	0.214286	0	8	0	2	5	0.4	4	15	0.266667	0	0	9	0	0	10	0	0	7	0	0	0	14	0	0	8	0	0	10	0
chr1	123425219	-	T	chr1:123425219	Dpp10	.	Intron	intron_variant	0	0	123424613	606	downstream	intronic	ADARB1	0.193548	5	20	0.25	2	20	0.1	5	22	0.227273	0	0	18	0	0	13	0	0	36	0	0	0	13	0	0	14	0	0	18	0
chr1	123425220	-	T	chr1:123425220	Dpp10	.	Intron	intron_variant	0	0	123424612	608	downstream	intronic	ADARB1	0.0806452	0	20	0	2	20	0.1	3	22	0.136364	0	0	18	0	0	13	0	0	30	0	0	0	13	0	0	14	0	0	18	0
chr1	123425221	-	T	chr1:123425221	Dpp10	.	Intron	intron_variant	0	0	123424612	609	downstream	intronic	ADARB1	0.145161	3	20	0.15	3	20	0.15	3	22	0.136364	0	0	18	0	0	13	0	0	32	0	0	0	13	0	0	14	0	0	18	0
chr1	123425239	-	T	chr1:123425239	Dpp10	.	Intron	intron_variant	0	0	123424592	647	downstream	intronic	ADARB1	0.246154	2	16	0.125	5	22	0.227273	9	27	0.333333	0	0	19	0	0	14	0	0	2	0	0	0	15	0	0	16	0	0	20	0
chr1	123425249	-	T	chr1:123425249	Dpp10	.	Intron	intron_variant	0	0	123424582	667	downstream	intronic	ADARB1	0.0869565	1	16	0.0625	1	24	0.0416667	4	29	0.137931	0	0	20	0	0	13	0	0	16	0	0	0	14	0	0	16	0	0	21	0
chr1	123426397	-	T	chr1:123426397	Dpp10	LTR	Intron	intron_variant	0	0	-	-	-	-	ADAR	0.0641026	0	19	0	2	30	0.0666667	3	29	0.103448	0	0	21	0	0	22	0	0	12	0	0.0454545	2	17	0.117647	0	21	0	0	6	0
chr1	123426547	-	T	chr1:123426547	Dpp10	LTR	Intron	intron_variant	0	0	-	-	-	-	ADARB1	0.0961538	1	19	0.0526316	2	13	0.153846	2	20	0.1	0	0	28	0	0	12	0	0	13	0	0	0	8	0	0	13	0	0	9	0
chr1	123431168	-	T	chr1:123431168	Dpp10	LTR	Intron	intron_variant	0	0	-	-	-	-	ADARB1	0.0431034	0	28	0	4	49	0.0816327	1	39	0.025641	0	0	41	0	0	42	0	0	10	0	0	0	28	0	0	14	0	0	7	0
chr1	123458407	-	T	chr1:123458407	Dpp10,Gm37781	SINE	Exon	non_coding_transcript_exon_variant	0	0	-	-	-	-	ADARB1	0.0743802	2	40	0.05	4	38	0.105263	3	43	0.0697674	0	0	34	0	0	30	0	0	30	0	0	0	12	0	0	20	0	0	12	0
chr1	123482517	-	T	chr1:123482517	Dpp10	LINE	Intron	intron_variant	0	0	123483288	771	upstream	intronic	ADAR	0.774194	8	10	0.8	9	11	0.818182	7	10	0.7	0	0	10	0	0	2	0	0	29	0	0.424242	6	13	0.461538	6	15	0.4	2	5	0.4
chr1	123482563	-	T	chr1:123482563	Dpp10	LINE	Intron	intron_variant	0	0	123483251	688	upstream	intronic	ADARB1	0.132743	2	28	0.0714286	5	38	0.131579	8	47	0.170213	0	0	17	0	0	28	0	0	30	0	0	0	14	0	0	24	0	0	9	0
chr1	123483296	-	T	chr1:123483296	Dpp10	LINE	Intron	intron_variant	0	0	123482509	787	downstream	intronic	ADAR	0.166667	2	12	0.166667	1	11	0.0909091	3	13	0.230769	0	0	14	0	0	6	0	0	26	0	0.05	1	8	0.125	0	11	0	0	1	0
chr1	123483299	-	T	chr1:123483299	Dpp10	LINE	Intron	intron_variant	0	0	123482504	795	downstream	intronic	ADAR	0.230769	2	12	0.166667	5	11	0.454545	2	16	0.125	0	0	15	0	0	6	0	0	26	0	0.047619	0	7	0	1	13	0.0769231	0	1	0
chr1	123483304	-	T	chr1:123483304	Dpp10	LINE	Intron	intron_variant	0	0	123482501	803	downstream	intronic	ADAR	0.358974	3	12	0.25	8	11	0.727273	3	16	0.1875	0	0	14	0	0	6	0	0	21	0	0.6	1	6	0.166667	10	13	0.769231	1	1	1
chr1	123483350	-	T	chr1:123483350	Dpp10	LINE	Intron	intron_variant	0	0	-	-	-	-	ADARB1	0.163636	1	13	0.0769231	4	17	0.235294	4	25	0.16	0	0	13	0	0	10	0	0	21	0	0	0	9	0	0	13	0	0	4	0
chr1	123512076	-	T	chr1:123512076	Dpp10	LINE	Intron	intron_variant	0	0	-	-	-	-	ADAR	0.075	1	20	0.05	2	25	0.08	3	35	0.0857143	0	0	17	0	0	13	0	0	50	0	0.025641	0	10	0	0	13	0	1	16	0.0625
chr1	123512151	-	T	chr1:123512151	Dpp10	LINE	Intron	intron_variant	0	0	-	-	-	-	ADAR	0.1	2	18	0.111111	3	37	0.0810811	5	45	0.111111	0	0	19	0	0	18	0	0	43	0	0.0625	0	9	0	3	26	0.115385	0	13	0
chr1	123538978	-	T	chr1:123538978	Dpp10	LINE	Intron	intron_variant	0	0	123538974	4	downstream	intronic	ADARB1	0.108108	3	24	0.125	2	21	0.0952381	3	29	0.103448	0	0	18	0	0	24	0	0	6	0	0	0	8	0	0	18	0	0	12	0
chr1	123538987	-	T	chr1:123538987	Dpp10	LINE	Intron	intron_variant	0	0	-	-	-	-	ADARB1	0.0625	2	28	0.0714286	2	22	0.0909091	1	30	0.0333333	0	0	19	0	0	26	0	0	38	0	0	0	7	0	0	21	0	0	13	0
chr1	123547959	-	T	chr1:123547959	Dpp10	.	Intron	intron_variant	0	0	-	-	-	-	ADARB1	0.0408163	1	22	0.0454545	0	29	0	3	47	0.0638298	0	0	17	0	0	19	0	0	21	0	0	0	25	0	0	18	0	0	16	0
chr1	123566932	-	T	chr1:123566932	Dpp10,Gm38263	LINE	Intron	intron_variant	0	0	123567815	883	upstream	intronic	ADAR	0.0538462	1	48	0.0208333	2	20	0.1	4	62	0.0645161	0	0	34	0	0	26	0	0	18	0	0.00934579	0	44	0	0	33	0	1	30	0.0333333
chr1	123566995	-	T	chr1:123566995	Dpp10,Gm38263	LINE	Intron	intron_variant	0	0	123567752	757	upstream	intronic	ADARB1	0.05	2	31	0.0645161	0	17	0	3	52	0.0576923	0	0	23	0	0	19	0	0	22	0	0	0	30	0	0	28	0	0	19	0
chr1	123569060	-	T	chr1:123569060	Dpp10	LINE	Intron	intron_variant	0	0	123566972	2088	downstream	intronic	ADAR	0.0671642	5	37	0.135135	4	57	0.0701754	0	40	0	0	0	29	0	0	22	0	0	21	0	0.0128205	0	26	0	0	26	0	1	26	0.0384615
chr1	123569080	-	T	chr1:123569080	Dpp10	LINE	Intron	intron_variant	0	0	-	-	-	-	ADARB1	0.104938	5	44	0.113636	9	64	0.140625	3	54	0.0555556	0	0	28	0	0	27	0	0	28	0	0	0	26	0	0	27	0	0	28	0
chr1	123569087	-	T	chr1:123569087	Dpp10	LINE	Intron	intron_variant	0	0	123571228	2141	upstream	Intron	ADARB1	0.10303	10	43	0.232558	5	64	0.078125	2	58	0.0344828	0	0	27	0	0	28	0	0	33	0	0	0	25	0	0	28	0	0	25	0
chr1	123586019	-	T	chr1:123586019	Dpp10	LINE	Intron	intron_variant	0	0	-	-	-	-	ADAR	0.116279	5	38	0.131579	1	18	0.0555556	4	30	0.133333	0	0	15	0	0	13	0	0	22	0	0.134146	4	31	0.129032	0	27	0	7	24	0.291667
chr1	123586038	-	T	chr1:123586038	Dpp10	LINE	Intron	intron_variant	0	0	-	-	-	-	ADARB1	0.0720721	7	51	0.137255	1	23	0.0434783	0	37	0	0	0	19	0	0	21	0	0	22	0	0	0	35	0	0	28	0	0	31	0
chr1	123599828	-	T	chr1:123599828	Dpp10	LINE	Intron	intron_variant	0	0	123600793	965	upstream	intronic	ADARB1	0.100917	3	21	0.142857	4	42	0.0952381	4	46	0.0869565	0	0	27	0	0	23	0	0	36	0	0	0	22	0	0	27	0	0	23	0
chr1	123599852	-	T	chr1:123599852	Dpp10	LINE	Intron	intron_variant	0	0	-	-	-	-	ADARB1	0.0686275	1	26	0.0384615	3	35	0.0857143	3	41	0.0731707	0	0	22	0	0	17	0	0	39	0	0	0	16	0	0	28	0	0	32	0
chr1	123599865	-	T	chr1:123599865	Dpp10	LINE	Intron	intron_variant	0	0	-	-	-	-	ADAR	0.396396	14	32	0.4375	16	34	0.470588	14	45	0.311111	0	0	22	0	0	20	0	0	28	0	0.2125	5	17	0.294118	4	31	0.129032	8	32	0.25
chr1	123599964	-	T	chr1:123599964	Dpp10	LINE	Intron	intron_variant	0	0	-	-	-	-	ADARB1	0.0471698	1	66	0.0151515	5	65	0.0769231	4	81	0.0493827	0	0	31	0	0	33	0	0	37	0	0	0	32	0	0	38	0	0	37	0
chr1	123599971	-	T	chr1:123599971	Dpp10	LINE	Intron	intron_variant	0	0	123600641	670	upstream	intronic	ADAR	0.324324	17	68	0.25	29	68	0.426471	26	86	0.302326	0	0	34	0	0	36	0	0	53	0	0.0747664	3	32	0.09375	1	37	0.027027	4	38	0.105263
chr1	123599985	-	T	chr1:123599985	Dpp10	LINE	Intron	intron_variant	0	0	-	-	-	-	ADARB1	0.235808	19	72	0.263889	18	82	0.219512	17	75	0.226667	0	0	33	0	0	36	0	0	55	0	0	0	34	0	0	36	0	0	35	0
chr1	123599986	-	T	chr1:123599986	Dpp10	LINE	Intron	intron_variant	0	0	-	-	-	-	ADAR	0.114407	7	75	0.0933333	7	83	0.0843373	13	78	0.166667	0	0	34	0	0	38	0	0	17	0	0.0480769	4	35	0.114286	0	35	0	1	34	0.0294118
chr1	123600004	-	T	chr1:123600004	Dpp10	LINE	Intron	intron_variant	0	0	-	-	-	-	ADARB1	0.0692308	5	75	0.0666667	6	103	0.0582524	7	82	0.0853659	0	0	38	0	0	40	0	0	25	0	0	0	39	0	0	34	0	0	33	0
chr1	123600011	-	T	chr1:123600011	Dpp10	LINE	Intron	intron_variant	0	0	-	-	-	-	ADARB1	0.0418251	2	73	0.0273973	4	107	0.0373832	5	83	0.060241	0	0	38	0	0	43	0	0	29	0	0	0	38	0	0	31	0	0	31	0
chr1	123600020	-	T	chr1:123600020	Dpp10	LINE	Intron	intron_variant	0	0	-	-	-	-	ADAR	0.230769	16	75	0.213333	21	109	0.192661	26	89	0.292135	0	0	38	0	0	44	0	0	25	0	0.295238	9	37	0.243243	15	37	0.405405	7	31	0.225806
chr1	123600052	-	T	chr1:123600052	Dpp10	LINE	Intron	intron_variant	0	0	-	-	-	-	ADAR	0.29386	20	61	0.327869	25	96	0.260417	22	71	0.309859	0	0	37	0	0	44	0	0	24	0	0.0117647	1	32	0.03125	0	26	0	0	27	0
chr1	123600053	-	T	chr1:123600053	Dpp10	LINE	Intron	intron_variant	0	0	-	-	-	-	ADARB1	0.0956522	9	60	0.15	8	99	0.0808081	5	71	0.0704225	0	0	37	0	0	42	0	0	45	0	0	0	33	0	0	26	0	0	28	0
chr1	123600073	-	T	chr1:123600073	Dpp10	LINE	Intron	intron_variant	0	0	-	-	-	-	ADAR	0.0636364	8	60	0.133333	2	88	0.0227273	4	72	0.0555556	0	0	42	0	0	37	0	0	51	0	0.0243902	0	30	0	2	27	0.0740741	0	25	0
chr1	123600156	-	T	chr1:123600156	Dpp10	LINE	Intron	intron_variant	0	0	-	-	-	-	ADARB1	0.0324324	4	59	0.0677966	2	52	0.0384615	0	74	0	0	0	37	0	0	31	0	0	52	0	0	0	27	0	0	24	0	0	15	0
chr1	123600180	-	T	chr1:123600180	Dpp10	LINE	Intron	intron_variant	0	0	-	-	-	-	ADAR	0.440789	15	47	0.319149	28	45	0.622222	24	60	0.4	0	0	34	0	0	28	0	0	52	0	0.242424	8	29	0.275862	6	23	0.26087	2	14	0.142857
chr1	123600761	-	T	chr1:123600761	Dpp10	LINE	Intron	intron_variant	0	0	-	-	-	-	ADARB1	0.0666667	2	53	0.0377358	2	22	0.0909091	4	45	0.0888889	0	0	23	0	0	13	0	0	55	0	0	0	35	0	0	27	0	0	26	0
chr1	123600784	-	T	chr1:123600784	Dpp10	LINE	Intron	intron_variant	0	0	123599828	956	downstream	intronic	ADARB1	0.0416667	3	48	0.0625	2	28	0.0714286	0	44	0	0	0	33	0	0	20	0	0	54	0	0	0	35	0	0	33	0	0	29	0
chr1	123600796	-	T	chr1:123600796	Dpp10	LINE	Intron	intron_variant	0	0	-	-	-	-	ADARB1	0.0420168	1	47	0.0212766	0	30	0	4	42	0.0952381	0	0	33	0	0	23	0	0	56	0	0	0	34	0	0	32	0	0	30	0
chr1	123601000	-	T	chr1:123601000	Dpp10	LINE	Intron	intron_variant	0	0	-	-	-	-	ADARB1	0.04	1	23	0.0434783	0	17	0	2	35	0.0571429	0	0	19	0	0	11	0	0	53	0	0	0	11	0	0	17	0	0	9	0
chr1	123665921	-	T	chr1:123665921	Dpp10	LINE	Intron	non_coding_transcript_variant	0	0	-	-	-	-	ADARB1	0.113208	1	14	0.0714286	5	22	0.227273	0	17	0	0	0	14	0	0	12	0	0	51	0	0	0	3	0	0	7	0	0	7	0
chr1	123713847	-	T	chr1:123713847	Dpp10	LINE	Intron	non_coding_transcript_variant	0	0	123714548	701	upstream	intronic	ADARB1	0.0555556	4	37	0.108108	0	15	0	1	38	0.0263158	0	0	19	0	0	12	0	0	53	0	0	0	19	0	0	23	0	0	10	0
chr1	123730033	-	T	chr1:123730033	Dpp10	SINE	Intron	non_coding_transcript_variant	0	0	-	-	-	-	ADARB1	0.0686275	0	20	0	3	34	0.0882353	4	48	0.0833333	0	0	32	0	0	17	0	0	54	0	0	0	20	0	0	18	0	0	14	0
chr1	123762859	-	T	chr1:123762859	Dpp10	LINE	Intron	non_coding_transcript_variant	0	0	-	-	-	-	ADARB1	0.0454545	0	31	0	3	25	0.12	2	54	0.037037	0	0	20	0	0	9	0	0	52	0	0	0	24	0	0	41	0	0	20	0
chr1	123762866	-	T	chr1:123762866	Dpp10	LINE	Intron	non_coding_transcript_variant	0	0	123762880	14	upstream	intronic	ADARB1	0.045045	1	30	0.0333333	4	25	0.16	0	56	0	0	0	21	0	0	9	0	0	30	0	0	0	27	0	0	40	0	0	21	0
chr1	123780397	-	T	chr1:123780397	Dpp10	LINE	Intron	non_coding_transcript_variant	0	0	123782667	2270	upstream	intronic	ADAR	0.375	9	31	0.290323	8	18	0.444444	10	23	0.434783	0	0	6	0	0	14	0	0	28	0	0.146341	3	17	0.176471	0	6	0	3	18	0.166667
chr1	123780452	-	T	chr1:123780452	Dpp10	LINE	Intron	non_coding_transcript_variant	0	0	123782571	2119	upstream	intronic	ADARB1	0.056338	2	32	0.0625	0	21	0	2	18	0.111111	0	0	5	0	0	17	0	0	30	0	0	0	21	0	0	7	0	0	20	0
chr1	123780453	-	T	chr1:123780453	Dpp10	LINE	Intron	non_coding_transcript_variant	0	0	123782571	2118	upstream	intronic	ADAR	0.0735294	3	31	0.0967742	0	19	0	2	18	0.111111	0	0	5	0	0	17	0	0	21	0	0.0625	2	21	0.0952381	0	7	0	1	20	0.05
chr1	123780458	-	T	chr1:123780458	Dpp10	LINE	Intron	non_coding_transcript_variant	0	0	123782566	2108	upstream	intronic	ADAR	0.0895522	1	28	0.0357143	0	19	0	5	20	0.25	0	0	5	0	0	16	0	0	24	0	0.0212766	0	21	0	1	7	0.142857	0	19	0
chr1	123782549	-	T	chr1:123782549	Dpp10	LINE	Intron	non_coding_transcript_variant	0	0	123780475	2074	downstream	intronic	ADAR	0.168539	1	30	0.0333333	9	22	0.409091	5	37	0.135135	0	0	15	0	0	11	0	0	19	0	0.181818	1	11	0.0909091	1	7	0.142857	2	4	0.5
chr1	123782558	-	T	chr1:123782558	Dpp10	LINE	Intron	non_coding_transcript_variant	0	0	123780465	2093	downstream	intronic	ADAR	0.0860215	0	29	0	3	25	0.12	5	39	0.128205	0	0	13	0	0	11	0	0	24	0	0.210526	1	10	0.1	1	6	0.166667	2	3	0.666667
chr1	123782582	-	T	chr1:123782582	Dpp10	LINE	Intron	non_coding_transcript_variant	0	0	123780441	2141	downstream	intronic	ADAR	0.414141	16	34	0.470588	9	26	0.346154	16	39	0.410256	0	0	12	0	0	13	0	0	32	0	0.0769231	0	13	0	0	8	0	2	5	0.4
chr1	123782663	-	T	chr1:123782663	Dpp10	LINE	Intron	non_coding_transcript_variant	0	0	123780401	2262	downstream	intronic	ADARB1	0.0564516	1	58	0.0172414	1	29	0.0344828	5	37	0.135135	0	0	21	0	0	15	0	0	30	0	0	0	18	0	0	11	0	0	12	0
chr1	123782673	-	T	chr1:123782673	Dpp10	LINE	Intron	non_coding_transcript_variant	0	0	123783994	1321	upstream	intronic	ADARB1	0.0661157	0	56	0	5	27	0.185185	3	38	0.0789474	0	0	23	0	0	14	0	0	29	0	0	0	14	0	0	8	0	0	12	0
chr1	123782678	-	T	chr1:123782678	Dpp10	LINE	Intron	non_coding_transcript_variant	0	0	123780386	2292	downstream	intronic	ADAR	0.465517	18	55	0.327273	11	24	0.458333	25	37	0.675676	0	0	23	0	0	14	0	0	24	0	0.764706	11	14	0.785714	7	8	0.875	8	12	0.666667
chr1	123782706	-	T	chr1:123782706	Dpp10	LINE	Intron	non_coding_transcript_variant	0	0	-	-	-	-	ADARB1	0.03	1	46	0.0217391	1	21	0.047619	1	33	0.030303	0	0	25	0	0	11	0	0	25	0	0	0	10	0	0	6	0	0	9	0
chr1	123783973	-	T	chr1:123783973	Dpp10	LINE	Intron	non_coding_transcript_variant	0	0	-	-	-	-	ADARB1	0.117188	2	48	0.0416667	11	39	0.282051	2	41	0.0487805	0	0	16	0	0	14	0	0	26	0	0	0	45	0	0	38	0	0	26	0
chr1	123783991	-	T	chr1:123783991	Dpp10	LINE	Intron	non_coding_transcript_variant	0	0	123782675	1316	downstream	intronic	ADARB1	0.18	7	50	0.14	18	48	0.375	2	52	0.0384615	0	0	20	0	0	20	0	0	25	0	0	0	53	0	0	41	0	0	28	0
chr1	123784000	-	T	chr1:123784000	Dpp10	LINE	Intron	non_coding_transcript_variant	0	0	123782667	1333	downstream	intronic	ADAR	0.121951	5	50	0.1	10	54	0.185185	5	60	0.0833333	0	0	20	0	0	25	0	0	19	0	0.0396825	2	53	0.0377358	3	42	0.0714286	0	31	0
chr1	123796758	-	T	chr1:123796758	Dpp10	LTR	Intron	non_coding_transcript_variant	0	0	-	-	-	-	ADAR	0.0547945	2	46	0.0434783	6	49	0.122449	0	51	0	0	0	28	0	0	22	0	0	23	0	0.0555556	0	42	0	5	39	0.128205	1	27	0.037037
chr1	123811084	-	T	chr1:123811084	Dpp10	SINE	Intron	non_coding_transcript_variant	0	0	123810558	526	downstream	intronic	ADAR	0.0666667	1	17	0.0588235	1	43	0.0232558	4	30	0.133333	0	0	31	0	0	6	0	0	31	0	0.0196078	0	18	0	1	18	0.0555556	0	15	0
chr1	123811104	-	T	chr1:123811104	Dpp10	SINE	Intron	non_coding_transcript_variant	0	0	123810538	566	downstream	intronic	ADARB1	0.0512821	2	19	0.105263	2	57	0.0350877	2	41	0.0487805	0	0	31	0	0	8	0	0	30	0	0	0	17	0	0	18	0	0	17	0
chr1	123811111	-	T	chr1:123811111	Dpp10	SINE	Intron	non_coding_transcript_variant	0	0	123810531	580	downstream	intronic	ADARB1	0.0983607	2	19	0.105263	3	57	0.0526316	7	46	0.152174	0	0	34	0	0	7	0	0	29	0	0	0	19	0	0	18	0	0	17	0
chr1	123845508	-	T	chr1:123845508	Dpp10	SINE	Intron	non_coding_transcript_variant	0	0	-	-	-	-	ADAR	0.0348259	1	48	0.0208333	3	73	0.0410959	3	80	0.0375	0	0	29	0	0	18	0	0	28	0	0.00588235	0	55	0	0	57	0	1	58	0.0172414
chr1	123853352	-	T	chr1:123853352	Dpp10	SINE	Intron	non_coding_transcript_variant	0	0	-	-	-	-	ADARB1	0.0379147	3	72	0.0416667	3	63	0.047619	2	76	0.0263158	0	0	37	0	0	33	0	0	28	0	0	0	73	0	0	49	0	0	49	0
chr1	123902989	-	T	chr1:123902989	Dpp10	.	Intron	non_coding_transcript_variant	0	0	123902071	918	downstream	Intron	ADARB1	0.0422535	2	23	0.0869565	1	21	0.047619	0	27	0	0	0	8	0	0	23	0	0	33	0	0	0	17	0	0	27	0	0	5	0
chr1	123902990	-	T	chr1:123902990	Dpp10	.	Intron	non_coding_transcript_variant	0	0	123903903	913	upstream	intronic	ADARB1	0.0985915	2	22	0.0909091	1	22	0.0454545	4	27	0.148148	0	0	8	0	0	23	0	0	40	0	0	0	19	0	0	28	0	0	6	0
chr1	123902999	-	T	chr1:123902999	Dpp10	.	Intron	non_coding_transcript_variant	0	0	-	-	-	-	ADAR	0.357143	5	22	0.227273	9	19	0.473684	11	29	0.37931	0	0	5	0	0	23	0	0	26	0	0.0384615	1	20	0.05	1	25	0.04	0	7	0
chr1	123903000	-	T	chr1:123903000	Dpp10	.	Intron	non_coding_transcript_variant	0	0	-	-	-	-	ADAR	0.608696	12	22	0.545455	14	18	0.777778	16	29	0.551724	0	0	5	0	0	23	0	0	19	0	0.122449	2	19	0.105263	3	24	0.125	1	6	0.166667
chr1	123903001	-	T	chr1:123903001	Dpp10	.	Intron	non_coding_transcript_variant	0	0	123903892	891	upstream	intronic	ADARB1	0.0588235	2	22	0.0909091	0	17	0	2	29	0.0689655	0	0	5	0	0	23	0	0	20	0	0	0	19	0	0	25	0	0	6	0
chr1	123903003	-	T	chr1:123903003	Dpp10	.	Intron	non_coding_transcript_variant	0	0	123903889	886	upstream	intronic	ADAR	0.597015	14	22	0.636364	12	18	0.666667	14	27	0.518519	0	0	5	0	0	23	0	0	20	0	0.0185185	0	21	0	0	26	0	1	7	0.142857
chr1	123903013	-	T	chr1:123903013	Dpp10	Simple	Intron	non_coding_transcript_variant	0	0	123903881	868	upstream	intronic	ADARB1	0.149254	1	20	0.05	1	17	0.0588235	8	30	0.266667	0	0	4	0	0	23	0	0	52	0	0	0	21	0	0	22	0	0	7	0
chr1	123903014	-	T	chr1:123903014	Dpp10	Simple	Intron	non_coding_transcript_variant	0	0	123903880	866	upstream	intronic	ADARB1	0.202899	3	21	0.142857	3	18	0.166667	8	30	0.266667	0	0	4	0	0	23	0	0	42	0	0	0	21	0	0	22	0	0	7	0
chr1	123903024	-	T	chr1:123903024	Dpp10	Simple	Intron	non_coding_transcript_variant	0	0	123903869	845	upstream	intronic	ADAR	0.0508475	2	18	0.111111	0	15	0	1	26	0.0384615	0	0	5	0	0	20	0	0	20	0	0.0222222	0	18	0	1	19	0.0526316	0	8	0
chr1	123903045	-	T	chr1:123903045	Dpp10	Simple	Intron	non_coding_transcript_variant	0	0	123903848	803	upstream	intronic	ADARB1	0.0526316	2	19	0.105263	1	13	0.0769231	0	25	0	0	0	6	0	0	17	0	0	21	0	0	0	22	0	0	18	0	0	12	0
chr1	123903049	-	T	chr1:123903049	Dpp10	Simple	Intron	non_coding_transcript_variant	0	0	123903844	795	upstream	intronic	ADARB1	0.266667	3	18	0.166667	3	12	0.25	10	30	0.333333	0	0	6	0	0	17	0	0	20	0	0	0	22	0	0	19	0	0	11	0
chr1	123903052	-	T	chr1:123903052	Dpp10	Simple	Intron	non_coding_transcript_variant	0	0	123903842	790	upstream	intronic	ADAR	0.305085	6	17	0.352941	2	13	0.153846	10	29	0.344828	0	0	6	0	0	18	0	0	18	0	0.0754717	2	21	0.0952381	2	21	0.0952381	0	11	0
chr1	123903761	-	T	chr1:123903761	Dpp10	.	Intron	non_coding_transcript_variant	0	0	-	-	-	-	ADARB1	0.0882353	2	5	0.4	0	15	0	1	14	0.0714286	0	0	6	0	0	3	0	0	18	0	0	0	17	0	0	17	0	0	21	0
chr1	123903965	-	T	chr1:123903965	Dpp10	.	Intron	non_coding_transcript_variant	0	0	-	-	-	-	ADAR	0.0614035	3	25	0.12	2	39	0.0512821	2	50	0.04	0	0	10	0	0	12	0	0	19	0	0.0447761	1	21	0.047619	2	23	0.0869565	0	23	0
chr1	123962830	-	T	chr1:123962830	Dpp10	LINE	Intron	non_coding_transcript_variant	0	0	-	-	-	-	ADARB1	0.0543478	1	34	0.0294118	2	33	0.0606061	2	25	0.08	0	0	7	0	0	10	0	0	17	0	0	0	19	0	0	21	0	0	19	0
chr1	123962867	-	T	chr1:123962867	Dpp10	LINE	Intron	non_coding_transcript_variant	0	0	-	-	-	-	ADARB1	0.0363636	1	44	0.0227273	3	34	0.0882353	0	32	0	0	0	10	0	0	10	0	0	17	0	0	0	22	0	0	20	0	0	28	0
chr1	123972804	-	T	chr1:123972804	Dpp10	LINE	Intron	non_coding_transcript_variant	0	0	-	-	-	-	ADARB1	0.0226244	1	89	0.011236	3	67	0.0447761	1	65	0.0153846	0	0	22	0	0	32	0	0	15	0	0	0	32	0	0	38	0	0	22	0
chr1	123994197	-	T	chr1:123994197	Dpp10	LINE	Intron	non_coding_transcript_variant	0	0	-	-	-	-	ADAR	0.0869565	1	27	0.037037	2	24	0.0833333	5	41	0.121951	0	0	11	0	0	17	0	0	15	0	0.150943	5	23	0.217391	1	16	0.0625	2	14	0.142857
chr1	123994198	-	T	chr1:123994198	Dpp10	LINE	Intron	non_coding_transcript_variant	0	0	-	-	-	-	ADAR	0.0326087	0	27	0	1	25	0.04	2	40	0.05	0	0	9	0	0	16	0	0	14	0	0.0377358	2	23	0.0869565	0	16	0	0	14	0
chr1	124055452	-	T	chr1:124055452	-	.	intergenic	intergenic_variant	0	0	-	-	-	-	ADARB1	0.151515	2	8	0.25	2	10	0.2	1	15	0.0666667	0	0	7	0	0	8	0	0	14	0	0	0	3	0	0	3	0	0	4	0
chr1	124055458	-	T	chr1:124055458	-	.	intergenic	intergenic_variant	0	0	-	-	-	-	ADARB1	0.0789474	1	10	0.1	2	11	0.181818	0	17	0	0	0	6	0	0	8	0	0	8	0	0	0	4	0	0	3	0	0	4	0
chr1	124055467	-	T	chr1:124055467	-	.	intergenic	intergenic_variant	0	0	-	-	-	-	ADAR	0.210526	4	10	0.4	2	13	0.153846	2	15	0.133333	0	0	6	0	0	8	0	0	24	0	0.272727	0	4	0	0	3	0	3	4	0.75
chr1	124055567	-	T	chr1:124055567	-	.	intergenic	intergenic_variant	0	0	-	-	-	-	ADARB1	0.151515	2	5	0.4	0	11	0	3	17	0.176471	0	0	5	0	0	7	0	0	37	0	0	0	2	0	0	3	0	0	2	0
chr1	124106610	-	T	chr1:124106610	-	LINE	intergenic	intergenic_variant	0	0	124108319	1709	upstream	undefined	ADAR	0.435897	2	13	0.153846	6	11	0.545455	9	15	0.6	0	0	17	0	0	9	0	0	44	0	0.105263	0	7	0	1	8	0.125	1	4	0.25
chr1	124106614	-	T	chr1:124106614	-	LINE	intergenic	intergenic_variant	0	0	124108315	1701	upstream	undefined	ADAR	0.4	4	14	0.285714	7	12	0.583333	5	14	0.357143	0	0	17	0	0	9	0	0	43	0	0.0526316	0	7	0	1	7	0.142857	0	5	0
chr1	124106619	-	T	chr1:124106619	-	LINE	intergenic	intergenic_variant	0	0	124108307	1688	upstream	undefined	ADAR	0.35	3	14	0.214286	7	13	0.538462	4	13	0.307692	0	0	18	0	0	10	0	0	11	0	0.421053	3	7	0.428571	4	7	0.571429	1	5	0.2
chr1	124106625	-	T	chr1:124106625	-	LINE	intergenic	intergenic_variant	0	0	124108307	1682	upstream	undefined	ADARB1	0.302326	4	15	0.266667	6	13	0.461538	3	15	0.2	0	0	18	0	0	12	0	0	12	0	0	0	7	0	0	6	0	0	5	0
chr1	124106635	-	T	chr1:124106635	-	LINE	intergenic	intergenic_variant	0	0	124108296	1661	upstream	undefined	ADARB1	0.125	2	14	0.142857	3	14	0.214286	1	20	0.05	0	0	17	0	0	13	0	0	5	0	0	0	5	0	0	8	0	0	5	0
chr1	124106674	-	T	chr1:124106674	-	LINE	intergenic	intergenic_variant	0	0	124108255	1581	upstream	undefined	ADAR	0.2	3	10	0.3	4	14	0.285714	2	21	0.0952381	0	0	19	0	0	18	0	0	5	0	0.423077	3	7	0.428571	6	10	0.6	2	9	0.222222
chr1	124106687	-	T	chr1:124106687	-	LINE	intergenic	intergenic_variant	0	0	124108244	1557	upstream	undefined	ADAR	0.166667	1	12	0.0833333	2	17	0.117647	6	25	0.24	0	0	17	0	0	16	0	0	5	0	0.142857	1	8	0.125	2	11	0.181818	1	9	0.111111
chr1	124106689	-	T	chr1:124106689	-	LINE	intergenic	intergenic_variant	0	0	124108241	1552	upstream	undefined	ADAR	0.153846	1	12	0.0833333	5	16	0.3125	2	24	0.0833333	0	0	19	0	0	17	0	0	9	0	0.178571	1	7	0.142857	3	12	0.25	1	9	0.111111
chr1	124106705	-	T	chr1:124106705	-	LINE	intergenic	intergenic_variant	0	0	124108224	1519	upstream	undefined	ADARB1	0.05	0	14	0	1	18	0.0555556	2	28	0.0714286	0	0	19	0	0	17	0	0	12	0	0	0	9	0	0	12	0	0	9	0
chr1	124108234	-	T	chr1:124108234	-	LINE	intergenic	intergenic_variant	0	0	124106695	1539	downstream	undefined	ADAR	0.122449	0	13	0	4	19	0.210526	2	17	0.117647	0	0	7	0	0	9	0	0	12	0	0.181818	1	10	0.1	2	7	0.285714	1	5	0.2
chr1	124108244	-	T	chr1:124108244	-	LINE	intergenic	intergenic_variant	0	0	124106006	2238	downstream	undefined	ADARB1	0.108696	0	13	0	3	17	0.176471	2	16	0.125	0	0	7	0	0	8	0	0	13	0	0	0	9	0	0	7	0	0	7	0
chr1	124108319	-	T	chr1:124108319	-	LINE	intergenic	intergenic_variant	0	0	124106610	1709	downstream	undefined	ADAR	0.166667	1	9	0.111111	4	20	0.2	4	25	0.16	0	0	9	0	0	12	0	0	16	0	0.0740741	0	10	0	2	9	0.222222	0	8	0
chr1	124108327	-	T	chr1:124108327	-	LINE	intergenic	intergenic_variant	0	0	124106603	1724	downstream	undefined	ADAR	0.584906	7	10	0.7	9	18	0.5	15	25	0.6	0	0	8	0	0	11	0	0	16	0	0.424242	5	10	0.5	5	9	0.555556	4	14	0.285714
chr1	124108330	-	T	chr1:124108330	-	LINE	intergenic	intergenic_variant	0	0	124106602	1728	downstream	undefined	ADAR	0.127273	0	11	0	3	19	0.157895	4	25	0.16	0	0	10	0	0	12	0	0	14	0	0.225806	4	10	0.4	2	9	0.222222	1	12	0.0833333
chr1	124108335	-	T	chr1:124108335	-	LINE	intergenic	intergenic_variant	0	0	124108028	307	downstream	undefined	ADAR	0.433962	5	10	0.5	8	20	0.4	10	23	0.434783	0	0	10	0	0	12	0	0	14	0	0.533333	6	10	0.6	3	8	0.375	7	12	0.583333
chr1	124108337	-	T	chr1:124108337	-	LINE	intergenic	intergenic_variant	0	0	-	-	-	-	ADAR	0.0566038	1	10	0.1	0	19	0	2	24	0.0833333	0	0	11	0	0	12	0	0	16	0	0.107143	0	9	0	1	7	0.142857	2	12	0.166667
chr1	124108338	-	T	chr1:124108338	-	LINE	intergenic	intergenic_variant	0	0	124106593	1745	downstream	undefined	ADAR	0.320755	2	9	0.222222	6	19	0.315789	9	25	0.36	0	0	12	0	0	12	0	0	16	0	0.0714286	0	9	0	1	7	0.142857	1	12	0.0833333
chr1	124122942	-	T	chr1:124122942	-	LINE	intergenic	intergenic_variant	0	0	-	-	-	-	ADAR	0.44	3	8	0.375	0	3	0	8	14	0.571429	0	0	12	0	0	16	0	0	26	0	0.0625	0	5	0	1	5	0.2	0	6	0
chr1	124122955	-	T	chr1:124122955	-	LINE	intergenic	intergenic_variant	0	0	-	-	-	-	ADARB1	0.166667	2	9	0.222222	1	4	0.25	1	11	0.0909091	0	0	11	0	0	16	0	0	23	0	0	0	6	0	0	5	0	0	6	0
chr1	124122996	-	T	chr1:124122996	-	LINE	intergenic	intergenic_variant	0	0	-	-	-	-	ADARB1	0.1	1	7	0.142857	0	7	0	1	6	0.166667	0	0	13	0	0	15	0	0	21	0	0	0	5	0	0	2	0	0	3	0
chr1	124123014	-	T	chr1:124123014	-	LINE	intergenic	intergenic_variant	0	0	-	-	-	-	ADARB1	0.136364	1	7	0.142857	0	9	0	2	6	0.333333	0	0	11	0	0	9	0	0	21	0	0	0	5	0	0	0	NA	0	2	0
chr1	124123932	-	T	chr1:124123932	-	LINE	intergenic	intergenic_variant	0	0	-	-	-	-	ADARB1	0.192308	1	9	0.111111	0	7	0	4	10	0.4	0	0	3	0	0	12	0	0	22	0	0	0	1	0	0	1	0	0	2	0
chr1	124123963	-	T	chr1:124123963	-	LINE	intergenic	intergenic_variant	0	0	-	-	-	-	ADARB1	0.136364	0	11	0	2	5	0.4	1	6	0.166667	0	0	3	0	0	9	0	0	23	0	0	0	1	0	0	1	0	0	3	0
chr1	124124024	-	T	chr1:124124024	-	LINE	intergenic	intergenic_variant	0	0	-	-	-	-	ADARB1	0.133333	0	6	0	1	6	0.166667	1	3	0.333333	0	0	2	0	0	4	0	0	24	0	0	0	0	NA	0	0	NA	0	2	0
chr1	124127687	-	T	chr1:124127687	-	LINE	intergenic	intergenic_variant	0	0	124127681	6	downstream	undefined	ADAR	0.636364	7	7	1	2	4	0.5	5	11	0.454545	0	0	5	0	0	9	0	0	23	0	0.2	2	11	0.181818	1	7	0.142857	1	2	0.5
chr1	124127699	-	T	chr1:124127699	-	LINE	intergenic	intergenic_variant	0	0	-	-	-	-	ADARB1	0.318182	1	6	0.166667	1	4	0.25	5	12	0.416667	0	0	7	0	0	10	0	0	12	0	0	0	12	0	0	7	0	0	3	0
chr1	124127702	-	T	chr1:124127702	-	LINE	intergenic	intergenic_variant	0	0	-	-	-	-	ADAR	0.333333	2	6	0.333333	1	4	0.25	4	11	0.363636	0	0	6	0	0	9	0	0	12	0	0.315789	3	10	0.3	3	7	0.428571	0	2	0
chr1	124127706	-	T	chr1:124127706	-	LINE	intergenic	intergenic_variant	0	0	-	-	-	-	ADAR	0.375	2	6	0.333333	2	4	0.5	5	14	0.357143	0	0	6	0	0	11	0	0	10	0	0.05	0	10	0	1	7	0.142857	0	3	0
chr1	124127754	-	T	chr1:124127754	-	LINE	intergenic	intergenic_variant	0	0	-	-	-	-	ADAR	0.152174	1	12	0.0833333	2	13	0.153846	4	21	0.190476	0	0	12	0	0	11	0	0	10	0	0.0555556	0	7	0	1	9	0.111111	0	2	0
chr1	124127756	-	T	chr1:124127756	-	LINE	intergenic	intergenic_variant	0	0	-	-	-	-	ADAR	0.115385	1	13	0.0769231	2	15	0.133333	3	24	0.125	0	0	13	0	0	14	0	0	5	0	0.1	1	7	0.142857	1	10	0.1	0	3	0
chr1	124127759	-	T	chr1:124127759	-	LINE	intergenic	intergenic_variant	0	0	-	-	-	-	ADAR	0.5	4	14	0.285714	7	16	0.4375	16	24	0.666667	0	0	13	0	0	15	0	0	4	0	0.222222	1	6	0.166667	3	9	0.333333	0	3	0
chr1	124127760	-	T	chr1:124127760	-	LINE	intergenic	intergenic_variant	0	0	-	-	-	-	ADAR	0.259259	1	14	0.0714286	2	16	0.125	11	24	0.458333	0	0	11	0	0	15	0	0	1	0	0.0588235	0	5	0	1	9	0.111111	0	3	0
chr1	124127762	-	T	chr1:124127762	-	LINE	intergenic	intergenic_variant	0	0	-	-	-	-	ADAR	0.240741	2	13	0.153846	5	18	0.277778	6	23	0.26087	0	0	13	0	0	19	0	0	5	0	0.157895	0	6	0	2	10	0.2	1	3	0.333333
chr1	124127769	-	T	chr1:124127769	-	LINE	intergenic	intergenic_variant	0	0	-	-	-	-	ADAR	0.22807	4	14	0.285714	6	20	0.3	3	23	0.130435	0	0	15	0	0	17	0	0	5	0	0.1	1	7	0.142857	1	10	0.1	0	3	0
chr1	124127776	-	T	chr1:124127776	-	LINE	intergenic	intergenic_variant	0	0	-	-	-	-	ADARB1	0.0491803	0	14	0	2	21	0.0952381	1	26	0.0384615	0	0	13	0	0	16	0	0	5	0	0	0	8	0	0	11	0	0	3	0
chr1	124127856	-	T	chr1:124127856	-	LINE	intergenic	intergenic_variant	0	0	-	-	-	-	ADAR	0.119565	1	23	0.0434783	4	29	0.137931	6	40	0.15	0	0	19	0	0	19	0	0	5	0	0.0526316	0	4	0	1	10	0.1	0	5	0
chr1	124134821	-	T	chr1:124134821	-	LTR	intergenic	intergenic_variant	0	0	-	-	-	-	ADAR	0.0909091	0	21	0	1	28	0.0357143	7	39	0.179487	0	0	22	0	0	17	0	0	7	0	0.0196078	0	18	0	1	23	0.0434783	0	10	0
chr1	124135467	-	T	chr1:124135467	-	LTR	intergenic	intergenic_variant	0	0	-	-	-	-	ADARB1	0.0877193	1	12	0.0833333	2	15	0.133333	2	30	0.0666667	0	0	20	0	0	24	0	0	6	0	0	0	14	0	0	22	0	0	14	0
chr1	124136827	-	T	chr1:124136827	-	LINE	intergenic	intergenic_variant	0	0	-	-	-	-	ADAR	0.230769	0	14	0	5	21	0.238095	10	30	0.333333	0	0	11	0	0	13	0	0	8	0	0.125	1	10	0.1	1	5	0.2	0	1	0
chr1	124136851	-	T	chr1:124136851	-	LINE	intergenic	intergenic_variant	0	0	-	-	-	-	ADAR	0.109589	1	15	0.0666667	4	26	0.153846	3	32	0.09375	0	0	16	0	0	16	0	0	9	0	0.0526316	0	12	0	1	5	0.2	0	2	0
chr1	124136871	-	T	chr1:124136871	-	LINE	intergenic	intergenic_variant	0	0	-	-	-	-	ADAR	0.118421	1	19	0.0526316	5	26	0.192308	3	31	0.0967742	0	0	19	0	0	16	0	0	10	0	0.0454545	0	15	0	1	5	0.2	0	2	0
chr1	124136907	-	T	chr1:124136907	-	LINE	intergenic	intergenic_variant	0	0	-	-	-	-	ADAR	0.0862069	2	16	0.125	1	19	0.0526316	2	23	0.0869565	0	0	11	0	0	17	0	0	10	0	0.0833333	1	7	0.142857	0	3	0	0	2	0
chr1	124136919	-	T	chr1:124136919	-	LINE	intergenic	intergenic_variant	0	0	-	-	-	-	ADARB1	0.258621	4	15	0.266667	6	19	0.315789	5	24	0.208333	0	0	13	0	0	17	0	0	13	0	0	0	7	0	0	3	0	0	2	0
chr1	124177523	-	T	chr1:124177523	-	SINE	intergenic	intergenic_variant	0	0	-	-	-	-	ADAR	0.0526316	1	15	0.0666667	2	22	0.0909091	1	39	0.025641	0	0	23	0	0	28	0	0	16	0	0.0294118	0	12	0	0	11	0	1	11	0.0909091
chr1	124183225	-	T	chr1:124183225	-	LINE	intergenic	intergenic_variant	0	0	-	-	-	-	ADAR	0.30303	4	9	0.444444	0	10	0	6	14	0.428571	0	0	14	0	0	5	0	0	31	0	0.3	1	2	0.5	1	4	0.25	1	4	0.25
chr1	124183267	-	T	chr1:124183267	-	LINE	intergenic	intergenic_variant	0	0	-	-	-	-	ADAR	0.25	4	13	0.307692	3	11	0.272727	3	16	0.1875	0	0	16	0	0	11	0	0	19	0	0.142857	0	3	0	2	6	0.333333	0	5	0
chr1	124183269	-	T	chr1:124183269	-	LINE	intergenic	intergenic_variant	0	0	-	-	-	-	ADAR	0.170732	5	13	0.384615	0	12	0	2	16	0.125	0	0	16	0	0	11	0	0	21	0	0.0714286	0	3	0	1	6	0.166667	0	5	0
chr1	124183291	-	T	chr1:124183291	-	LINE	intergenic	intergenic_variant	0	0	-	-	-	-	ADAR	0.297872	6	17	0.352941	4	14	0.285714	4	16	0.25	0	0	20	0	0	15	0	0	22	0	0.0625	0	5	0	1	5	0.2	0	6	0
chr1	124183302	-	T	chr1:124183302	-	LINE	intergenic	intergenic_variant	0	0	-	-	-	-	ADAR	0.236364	4	18	0.222222	5	17	0.294118	4	20	0.2	0	0	20	0	0	16	0	0	21	0	0.2	0	5	0	1	5	0.2	2	5	0.4
chr1	124183314	-	T	chr1:124183314	-	LINE	intergenic	intergenic_variant	0	0	124183322	8	upstream	undefined	ADAR	0.186441	5	21	0.238095	1	16	0.0625	5	22	0.227273	0	0	21	0	0	19	0	0	20	0	0.235294	0	4	0	2	7	0.285714	2	6	0.333333
chr1	124188255	-	T	chr1:124188255	-	LINE	intergenic	intergenic_variant	0	0	-	-	-	-	ADARB1	0.0609756	3	28	0.107143	0	19	0	2	35	0.0571429	0	0	19	0	0	24	0	0	17	0	0	0	12	0	0	8	0	0	9	0
chr1	124188259	-	T	chr1:124188259	-	LINE	intergenic	intergenic_variant	0	0	-	-	-	-	ADARB1	0.0705882	1	28	0.0357143	4	20	0.2	1	37	0.027027	0	0	23	0	0	25	0	0	27	0	0	0	11	0	0	8	0	0	10	0
chr1	124188262	-	T	chr1:124188262	-	LINE	intergenic	intergenic_variant	0	0	-	-	-	-	ADAR	0.1	3	28	0.107143	3	24	0.125	3	38	0.0789474	0	0	25	0	0	28	0	0	12	0	0.266667	4	11	0.363636	4	8	0.5	0	11	0
chr1	124188275	-	T	chr1:124188275	-	LINE	intergenic	intergenic_variant	0	0	-	-	-	-	ADAR	0.197674	6	29	0.206897	4	22	0.181818	7	35	0.2	0	0	26	0	0	21	0	0	19	0	0.222222	3	9	0.333333	3	8	0.375	0	10	0
chr1	124188308	-	T	chr1:124188308	-	LINE	intergenic	intergenic_variant	0	0	-	-	-	-	ADAR	0.0493827	1	23	0.0434783	2	23	0.0869565	1	35	0.0285714	0	0	27	0	0	22	0	0	20	0	0.0909091	0	7	0	2	7	0.285714	0	8	0
chr1	124188355	-	T	chr1:124188355	-	LINE	intergenic	intergenic_variant	0	0	-	-	-	-	ADAR	0.125	2	18	0.111111	5	16	0.3125	2	38	0.0526316	0	0	14	0	0	15	0	0	26	0	0.0588235	0	5	0	1	6	0.166667	0	6	0
chr1	124189280	-	T	chr1:124189280	-	LINE	intergenic	intergenic_variant	0	0	-	-	-	-	ADARB1	0.0902778	5	46	0.108696	1	36	0.0277778	7	62	0.112903	0	0	33	0	0	30	0	0	26	0	0	0	14	0	0	9	0	0	16	0
chr1	124189301	-	T	chr1:124189301	-	LINE	intergenic	intergenic_variant	0	0	-	-	-	-	ADARB1	0.0709677	6	48	0.125	3	40	0.075	2	67	0.0298507	0	0	32	0	0	32	0	0	29	0	0	0	10	0	0	5	0	0	9	0
chr1	124189354	-	T	chr1:124189354	-	LINE	intergenic	intergenic_variant	0	0	-	-	-	-	ADAR	0.205714	11	47	0.234043	10	52	0.192308	15	76	0.197368	0	0	24	0	0	31	0	0	37	0	0.142857	4	15	0.266667	0	6	0	0	7	0
chr1	124194274	-	T	chr1:124194274	-	SINE	intergenic	intergenic_variant	0	0	-	-	-	-	ADAR	0.147541	1	10	0.1	4	29	0.137931	4	22	0.181818	0	0	17	0	0	15	0	0	37	0	0.272727	0	10	0	4	9	0.444444	2	3	0.666667
chr1	124222818	-	T	chr1:124222818	-	.	intergenic	intergenic_variant	0	0	124224739	1921	upstream	undefined	ADAR	0.172414	1	13	0.0769231	6	24	0.25	3	21	0.142857	0	0	13	0	0	14	0	0	40	0	0.0961538	1	28	0.0357143	0	11	0	4	13	0.307692
chr1	124223951	-	T	chr1:124223951	-	LTR	intergenic	intergenic_variant	0	0	-	-	-	-	ADARB1	0.0555556	0	35	0	1	35	0.0285714	6	56	0.107143	0	0	28	0	0	54	0	0	39	0	0	0	14	0	0	18	0	0	11	0
chr1	124224770	-	T	chr1:124224770	-	.	intergenic	intergenic_variant	0	0	124222783	1987	downstream	undefined	ADARB1	0.1	1	10	0.1	1	12	0.0833333	2	18	0.111111	0	0	8	0	0	27	0	0	26	0	0	0	19	0	0	11	0	0	6	0
chr1	124227949	-	T	chr1:124227949	-	SINE	intergenic	intergenic_variant	0	0	-	-	-	-	ADAR	0.0597015	4	44	0.0909091	0	38	0	4	52	0.0769231	0	0	12	0	0	21	0	0	13	0	0.0263158	1	21	0.047619	0	9	0	0	8	0
chr1	124233156	-	T	chr1:124233156	-	SINE	intergenic	intergenic_variant	0	0	-	-	-	-	ADARB1	0.107914	8	33	0.242424	4	50	0.08	3	56	0.0535714	0	0	42	0	0	36	0	0	41	0	0	0	28	0	0	24	0	0	20	0
chr1	124258804	-	T	chr1:124258804	-	LINE	intergenic	intergenic_variant	0	0	124260511	1707	upstream	undefined	ADARB1	0.057971	1	18	0.0555556	3	23	0.130435	0	28	0	0	0	25	0	0	22	0	0	48	0	0	0	7	0	0	8	0	0	16	0
chr1	124258817	-	T	chr1:124258817	-	LINE	intergenic	intergenic_variant	0	0	124260498	1681	upstream	undefined	ADAR	0.119403	2	15	0.133333	1	21	0.047619	5	31	0.16129	0	0	26	0	0	22	0	0	50	0	0.0689655	2	7	0.285714	0	6	0	0	16	0
chr1	124258914	-	T	chr1:124258914	-	LINE	intergenic	intergenic_variant	0	0	124260402	1488	upstream	undefined	ADARB1	0.0508475	1	16	0.0625	0	11	0	2	32	0.0625	0	0	20	0	0	20	0	0	29	0	0	0	15	0	0	6	0	0	12	0
chr1	124258973	-	T	chr1:124258973	-	LINE	intergenic	intergenic_variant	0	0	-	-	-	-	ADAR	0.234694	5	26	0.192308	4	22	0.181818	14	50	0.28	0	0	23	0	0	23	0	0	17	0	0.0816327	2	28	0.0714286	0	7	0	2	14	0.142857
chr1	124259012	-	T	chr1:124259012	-	LINE	intergenic	intergenic_variant	0	0	124260305	1293	upstream	undefined	ADAR	0.196078	7	22	0.318182	4	26	0.153846	9	54	0.166667	0	0	24	0	0	32	0	0	72	0	0.0487805	0	21	0	0	6	0	2	14	0.142857
chr1	124259028	-	T	chr1:124259028	-	LINE	intergenic	intergenic_variant	0	0	-	-	-	-	ADARB1	0.0754717	2	26	0.0769231	1	24	0.0416667	5	56	0.0892857	0	0	25	0	0	36	0	0	21	0	0	0	23	0	0	7	0	0	15	0
chr1	124259035	-	T	chr1:124259035	-	LINE	intergenic	intergenic_variant	0	0	124260283	1248	upstream	undefined	ADARB1	0.0540541	5	25	0.2	0	28	0	1	58	0.0172414	0	0	26	0	0	33	0	0	51	0	0	0	23	0	0	6	0	0	16	0
chr1	124259049	-	T	chr1:124259049	-	LINE	intergenic	intergenic_variant	0	0	124260268	1219	upstream	undefined	ADARB1	0.0695652	4	25	0.16	1	29	0.0344828	3	61	0.0491803	0	0	27	0	0	32	0	0	62	0	0	0	20	0	0	6	0	0	15	0
chr1	124259133	-	T	chr1:124259133	-	LINE	intergenic	intergenic_variant	0	0	-	-	-	-	ADAR	0.757576	14	25	0.56	26	32	0.8125	35	42	0.833333	0	0	25	0	0	24	0	0	27	0	0.666667	7	11	0.636364	6	7	0.857143	5	9	0.555556
chr1	124259140	-	T	chr1:124259140	-	LINE	intergenic	intergenic_variant	0	0	-	-	-	-	ADAR	0.22549	3	24	0.125	6	33	0.181818	14	45	0.311111	0	0	26	0	0	25	0	0	23	0	0.0357143	1	11	0.0909091	0	7	0	0	10	0
chr1	124259207	-	T	chr1:124259207	-	LINE	intergenic	intergenic_variant	0	0	-	-	-	-	ADAR	0.303571	4	21	0.190476	18	42	0.428571	12	49	0.244898	0	0	31	0	0	39	0	0	25	0	0.15	1	9	0.111111	2	6	0.333333	0	5	0
chr1	124259217	-	T	chr1:124259217	-	LINE	intergenic	intergenic_variant	0	0	-	-	-	-	ADAR	0.10101	2	18	0.111111	3	38	0.0789474	5	43	0.116279	0	0	28	0	0	35	0	0	37	0	0.368421	3	8	0.375	1	5	0.2	3	6	0.5
chr1	124259224	-	T	chr1:124259224	-	LINE	intergenic	intergenic_variant	0	0	-	-	-	-	ADAR	0.107527	3	18	0.166667	5	35	0.142857	2	40	0.05	0	0	25	0	0	32	0	0	40	0	0.1	2	9	0.222222	0	5	0	0	6	0
chr1	124259231	-	T	chr1:124259231	-	LINE	intergenic	intergenic_variant	0	0	124260084	853	upstream	undefined	ADARB1	0.139785	3	18	0.166667	3	34	0.0882353	7	41	0.170732	0	0	21	0	0	28	0	0	41	0	0	0	9	0	0	5	0	0	5	0
chr1	124259238	-	T	chr1:124259238	-	LINE	intergenic	intergenic_variant	0	0	124260080	842	upstream	undefined	ADARB1	0.0824742	0	18	0	1	36	0.0277778	7	43	0.162791	0	0	21	0	0	32	0	0	43	0	0	0	8	0	0	5	0	0	4	0
chr1	124259286	-	T	chr1:124259286	-	LINE	intergenic	intergenic_variant	0	0	124257277	2009	downstream	undefined	ADARB1	0.0630631	3	23	0.130435	4	36	0.111111	0	52	0	0	0	29	0	0	29	0	0	43	0	0	0	10	0	0	8	0	0	18	0
chr1	124259333	-	T	chr1:124259333	-	LINE	intergenic	intergenic_variant	0	0	124259924	591	upstream	undefined	ADAR	0.0683761	4	35	0.114286	3	35	0.0857143	1	47	0.0212766	0	0	32	0	0	23	0	0	33	0	0.0714286	0	12	0	0	7	0	3	23	0.130435
chr1	124259384	-	T	chr1:124259384	-	LINE	intergenic	intergenic_variant	0	0	-	-	-	-	ADARB1	0.204819	4	22	0.181818	10	28	0.357143	3	33	0.0909091	0	0	26	0	0	26	0	0	34	0	0	0	16	0	0	8	0	0	17	0
chr1	124259417	-	T	chr1:124259417	-	LINE	intergenic	intergenic_variant	0	0	-	-	-	-	ADAR	0.19697	5	20	0.25	3	20	0.15	5	26	0.192308	0	0	18	0	0	28	0	0	37	0	0.0666667	1	17	0.0588235	1	14	0.0714286	1	14	0.0714286
chr1	124259425	-	T	chr1:124259425	-	LINE	intergenic	intergenic_variant	0	0	-	-	-	-	ADAR	0.150943	2	14	0.142857	3	17	0.176471	3	22	0.136364	0	0	18	0	0	25	0	0	35	0	0.0952381	1	17	0.0588235	2	14	0.142857	1	11	0.0909091
chr1	124259456	-	T	chr1:124259456	-	LINE	intergenic	intergenic_variant	0	0	-	-	-	-	ADAR	0.142857	1	5	0.2	1	13	0.0769231	4	24	0.166667	0	0	12	0	0	29	0	0	33	0	0.324324	5	15	0.333333	4	15	0.266667	3	7	0.428571
chr1	124259808	-	T	chr1:124259808	-	LINE	intergenic	intergenic_variant	0	0	124259441	367	downstream	undefined	ADAR	0.166667	1	2	0.5	1	12	0.0833333	1	4	0.25	0	0	2	0	0	2	0	0	31	0	0.0740741	2	10	0.2	0	4	0	0	13	0
chr1	124259896	-	T	chr1:124259896	-	LINE	intergenic	intergenic_variant	0	0	124259361	535	downstream	undefined	ADAR	0.189189	1	7	0.142857	1	8	0.125	5	22	0.227273	0	0	6	0	0	6	0	0	36	0	0.0666667	0	2	0	0	5	0	1	8	0.125
chr1	124259908	-	T	chr1:124259908	-	LINE	intergenic	intergenic_variant	0	0	124259350	558	downstream	undefined	ADAR	0.764706	8	11	0.727273	10	13	0.769231	21	27	0.777778	0	0	8	0	0	9	0	0	40	0	0.130435	1	6	0.166667	1	7	0.142857	1	10	0.1
chr1	124259911	-	T	chr1:124259911	-	LINE	intergenic	intergenic_variant	0	0	124259346	565	downstream	undefined	ADAR	0.396226	3	11	0.272727	5	14	0.357143	13	28	0.464286	0	0	8	0	0	9	0	0	35	0	0.0416667	1	6	0.166667	0	8	0	0	10	0
chr1	124259914	-	T	chr1:124259914	-	LINE	intergenic	intergenic_variant	0	0	124259343	571	downstream	undefined	ADAR	0.307692	3	10	0.3	4	14	0.285714	9	28	0.321429	0	0	7	0	0	11	0	0	33	0	0.136364	1	6	0.166667	0	7	0	2	9	0.222222
chr1	124259916	-	T	chr1:124259916	-	LINE	intergenic	intergenic_variant	0	0	124259342	574	downstream	undefined	ADAR	0.622642	6	11	0.545455	11	13	0.846154	16	29	0.551724	0	0	8	0	0	11	0	0	29	0	0.318182	3	6	0.5	2	7	0.285714	2	9	0.222222
chr1	124259919	-	T	chr1:124259919	-	LINE	intergenic	intergenic_variant	0	0	124259338	581	downstream	undefined	ADARB1	0.12963	2	11	0.181818	2	13	0.153846	3	30	0.1	0	0	10	0	0	11	0	0	30	0	0	0	6	0	0	7	0	0	9	0
chr1	124259933	-	T	chr1:124259933	-	LINE	intergenic	intergenic_variant	0	0	-	-	-	-	ADAR	0.22807	1	11	0.0909091	2	13	0.153846	10	33	0.30303	0	0	12	0	0	14	0	0	31	0	0.28	3	9	0.333333	2	8	0.25	2	8	0.25
chr1	124259956	-	T	chr1:124259956	-	LINE	intergenic	intergenic_variant	0	0	-	-	-	-	ADARB1	0.0434783	1	16	0.0625	0	16	0	2	37	0.0540541	0	0	13	0	0	16	0	0	6	0	0	0	13	0	0	11	0	0	11	0
chr1	124260086	-	T	chr1:124260086	-	LINE	intergenic	intergenic_variant	0	0	124259230	856	downstream	undefined	ADAR	0.0606061	1	42	0.0238095	4	23	0.173913	1	34	0.0294118	0	0	27	0	0	19	0	0	11	0	0.0888889	3	24	0.125	0	12	0	1	9	0.111111
chr1	124260095	-	T	chr1:124260095	-	LINE	intergenic	intergenic_variant	0	0	-	-	-	-	ADAR	0.0594059	2	45	0.0444444	1	21	0.047619	3	35	0.0857143	0	0	22	0	0	19	0	0	18	0	0.128205	5	23	0.217391	0	10	0	0	6	0
chr1	124260097	-	T	chr1:124260097	-	LINE	intergenic	intergenic_variant	0	0	-	-	-	-	ADAR	0.0769231	3	46	0.0652174	3	23	0.130435	2	35	0.0571429	0	0	22	0	0	19	0	0	18	0	0.0263158	1	23	0.0434783	0	8	0	0	7	0
chr1	124260098	-	T	chr1:124260098	-	LINE	intergenic	intergenic_variant	0	0	-	-	-	-	ADARB1	0.0377358	3	50	0.06	1	23	0.0434783	0	33	0	0	0	23	0	0	19	0	0	17	0	0	0	23	0	0	8	0	0	7	0
chr1	124260100	-	T	chr1:124260100	-	LINE	intergenic	intergenic_variant	0	0	-	-	-	-	ADAR	0.311927	12	50	0.24	10	26	0.384615	12	33	0.363636	0	0	23	0	0	19	0	0	17	0	0.236842	5	23	0.217391	1	8	0.125	3	7	0.428571
chr1	124260101	-	T	chr1:124260101	-	LINE	intergenic	intergenic_variant	0	0	-	-	-	-	ADAR	0.0818182	3	51	0.0588235	4	26	0.153846	2	33	0.0606061	0	0	23	0	0	17	0	0	17	0	0.0555556	1	21	0.047619	1	8	0.125	0	7	0
chr1	124260106	-	T	chr1:124260106	-	LINE	intergenic	intergenic_variant	0	0	124259212	894	downstream	undefined	ADAR	0.380531	20	51	0.392157	12	29	0.413793	11	33	0.333333	0	0	24	0	0	20	0	0	21	0	0.315789	8	21	0.380952	3	9	0.333333	1	8	0.125
chr1	124260110	-	T	chr1:124260110	-	LINE	intergenic	intergenic_variant	0	0	-	-	-	-	ADAR	0.14876	7	56	0.125	4	29	0.137931	7	36	0.194444	0	0	24	0	0	20	0	0	25	0	0.0810811	2	21	0.0952381	1	9	0.111111	0	7	0
chr1	124260162	-	T	chr1:124260162	-	LINE	intergenic	intergenic_variant	0	0	124259155	1007	downstream	undefined	ADARB1	0.0379747	3	60	0.05	2	45	0.0444444	1	53	0.0188679	0	0	37	0	0	38	0	0	29	0	0	0	17	0	0	12	0	0	10	0
chr1	124260182	-	T	chr1:124260182	-	LINE	intergenic	intergenic_variant	0	0	-	-	-	-	ADAR	0.797619	52	62	0.83871	33	48	0.6875	49	58	0.844828	0	0	50	0	0	43	0	0	26	0	0.4	12	22	0.545455	2	13	0.153846	4	10	0.4
chr1	124260193	-	T	chr1:124260193	-	LINE	intergenic	intergenic_variant	0	0	124259123	1070	downstream	undefined	ADAR	0.100559	5	68	0.0735294	1	54	0.0185185	12	57	0.210526	0	0	50	0	0	42	0	0	25	0	0.108696	1	22	0.0454545	2	15	0.133333	2	9	0.222222
chr1	124260206	-	T	chr1:124260206	-	LINE	intergenic	intergenic_variant	0	0	124259111	1095	downstream	undefined	ADAR	0.038674	2	65	0.0307692	2	54	0.037037	3	62	0.0483871	0	0	47	0	0	47	0	0	26	0	0.0232558	1	22	0.0454545	0	14	0	0	7	0
chr1	124260211	-	T	chr1:124260211	-	LINE	intergenic	intergenic_variant	0	0	124259106	1105	downstream	undefined	ADARB1	0.0693642	5	57	0.0877193	2	54	0.037037	5	62	0.0806452	0	0	45	0	0	50	0	0	27	0	0	0	19	0	0	14	0	0	7	0
chr1	124260275	-	T	chr1:124260275	-	LINE	intergenic	intergenic_variant	0	0	124259042	1233	downstream	undefined	ADAR	0.0535714	4	64	0.0625	3	50	0.06	2	54	0.037037	0	0	60	0	0	47	0	0	27	0	0.05	0	20	0	2	14	0.142857	0	6	0
chr1	124260278	-	T	chr1:124260278	-	LINE	intergenic	intergenic_variant	0	0	124259039	1239	downstream	undefined	ADAR	0.269461	19	66	0.287879	13	49	0.265306	13	52	0.25	0	0	59	0	0	47	0	0	28	0	0.075	3	19	0.157895	0	15	0	0	6	0
chr1	124260291	-	T	chr1:124260291	-	LINE	intergenic	intergenic_variant	0	0	124259025	1266	downstream	undefined	ADARB1	0.045977	1	64	0.015625	6	52	0.115385	1	58	0.0172414	0	0	62	0	0	49	0	0	29	0	0	0	21	0	0	18	0	0	10	0
chr1	124260296	-	T	chr1:124260296	-	LINE	intergenic	intergenic_variant	0	0	-	-	-	-	ADARB1	0.0227273	3	66	0.0454545	1	52	0.0192308	0	58	0	0	0	58	0	0	48	0	0	39	0	0	0	21	0	0	18	0	0	9	0
chr1	124260360	-	T	chr1:124260360	-	LINE	intergenic	intergenic_variant	0	0	-	-	-	-	ADARB1	0.05	3	56	0.0535714	1	43	0.0232558	4	61	0.0655738	0	0	48	0	0	42	0	0	40	0	0	0	22	0	0	15	0	0	11	0
chr1	124260397	-	T	chr1:124260397	-	LINE	intergenic	intergenic_variant	0	0	124258919	1478	downstream	undefined	ADAR	0.0895522	5	41	0.121951	4	38	0.105263	3	55	0.0545455	0	0	39	0	0	35	0	0	40	0	0.0754717	1	24	0.0416667	1	15	0.0666667	2	14	0.142857
chr1	124260426	-	T	chr1:124260426	-	LINE	intergenic	intergenic_variant	0	0	124258889	1537	downstream	undefined	ADAR	0.0442478	3	33	0.0909091	1	32	0.03125	1	48	0.0208333	0	0	37	0	0	22	0	0	40	0	0.06	0	23	0	1	15	0.0666667	2	12	0.166667
chr1	124260443	-	T	chr1:124260443	-	LINE	intergenic	intergenic_variant	0	0	124258871	1572	downstream	undefined	ADARB1	0.0485437	2	23	0.0869565	0	29	0	3	51	0.0588235	0	0	31	0	0	23	0	0	40	0	0	0	22	0	0	15	0	0	12	0
chr1	124260460	-	T	chr1:124260460	-	LINE	intergenic	intergenic_variant	0	0	124258854	1606	downstream	undefined	ADAR	0.0891089	3	25	0.12	1	29	0.0344828	5	47	0.106383	0	0	29	0	0	22	0	0	38	0	0.0638298	1	19	0.0526316	1	17	0.0588235	1	11	0.0909091
chr1	124260523	-	T	chr1:124260523	-	LINE	intergenic	intergenic_variant	0	0	124258792	1731	downstream	undefined	ADAR	0.0720721	0	28	0	4	35	0.114286	4	48	0.0833333	0	0	16	0	0	20	0	0	38	0	0.0227273	1	18	0.0555556	0	18	0	0	8	0
chr1	124260538	-	T	chr1:124260538	-	LINE	intergenic	intergenic_variant	0	0	124258777	1761	downstream	undefined	ADARB1	0.0458716	1	28	0.0357143	2	36	0.0555556	2	45	0.0444444	0	0	10	0	0	21	0	0	37	0	0	0	17	0	0	18	0	0	9	0
chr1	124263693	-	T	chr1:124263693	-	LINE	intergenic	intergenic_variant	0	0	-	-	-	-	ADAR	0.0776699	3	31	0.0967742	2	29	0.0689655	3	43	0.0697674	0	0	17	0	0	24	0	0	38	0	0.0652174	1	25	0.04	1	14	0.0714286	1	7	0.142857
chr1	124263694	-	T	chr1:124263694	-	LINE	intergenic	intergenic_variant	0	0	-	-	-	-	ADAR	0.0480769	3	31	0.0967742	1	29	0.0344828	1	44	0.0227273	0	0	18	0	0	25	0	0	31	0	0.0227273	0	24	0	0	12	0	1	8	0.125
chr1	124263696	-	T	chr1:124263696	-	LINE	intergenic	intergenic_variant	0	0	-	-	-	-	ADARB1	0.254902	12	29	0.413793	4	29	0.137931	10	44	0.227273	0	0	18	0	0	26	0	0	26	0	0	0	24	0	0	13	0	0	7	0
chr1	124263700	-	T	chr1:124263700	-	LINE	intergenic	intergenic_variant	0	0	-	-	-	-	ADAR	0.0865385	3	31	0.0967742	1	30	0.0333333	5	43	0.116279	0	0	18	0	0	25	0	0	33	0	0.285714	6	23	0.26087	5	12	0.416667	1	7	0.142857
chr1	124263718	-	T	chr1:124263718	-	LINE	intergenic	intergenic_variant	0	0	-	-	-	-	ADAR	0.213592	5	27	0.185185	7	31	0.225806	10	45	0.222222	0	0	23	0	0	22	0	0	34	0	0.32	5	15	0.333333	2	5	0.4	1	5	0.2
chr1	124263721	-	T	chr1:124263721	-	LINE	intergenic	intergenic_variant	0	0	-	-	-	-	ADAR	0.111111	3	27	0.111111	3	29	0.103448	5	43	0.116279	0	0	24	0	0	23	0	0	32	0	0.0384615	0	16	0	0	6	0	1	4	0.25
chr1	124263723	-	T	chr1:124263723	-	LINE	intergenic	intergenic_variant	0	0	-	-	-	-	ADARB1	0.0816327	4	23	0.173913	1	31	0.0322581	3	44	0.0681818	0	0	24	0	0	26	0	0	30	0	0	0	15	0	0	8	0	0	4	0
chr1	124268139	-	T	chr1:124268139	-	LINE	intergenic	intergenic_variant	0	0	-	-	-	-	ADARB1	0.109091	2	20	0.1	1	16	0.0625	3	19	0.157895	0	0	12	0	0	3	0	0	26	0	0	0	18	0	0	11	0	0	3	0
chr1	124268187	-	T	chr1:124268187	-	LINE	intergenic	intergenic_variant	0	0	-	-	-	-	ADAR	0.257143	9	37	0.243243	2	29	0.0689655	16	39	0.410256	0	0	24	0	0	10	0	0	32	0	0.111111	2	27	0.0740741	3	15	0.2	0	3	0
chr1	124268196	-	T	chr1:124268196	-	LINE	intergenic	intergenic_variant	0	0	-	-	-	-	ADAR	0.0566038	4	37	0.108108	0	28	0	2	41	0.0487805	0	0	26	0	0	11	0	0	33	0	0.0961538	2	29	0.0689655	2	19	0.105263	1	4	0.25
chr1	124272559	-	T	chr1:124272559	-	SINE	intergenic	intergenic_variant	0	0	-	-	-	-	ADARB1	0.0430108	0	26	0	1	27	0.037037	3	40	0.075	0	0	18	0	0	26	0	0	33	0	0	0	28	0	0	18	0	0	6	0
chr1	124282218	-	T	chr1:124282218	-	LTR	intergenic	intergenic_variant	0	0	-	-	-	-	ADARB1	0.0487805	1	27	0.037037	2	23	0.0869565	1	32	0.03125	0	0	18	0	0	26	0	0	32	0	0	0	16	0	0	7	0	0	14	0
chr1	124297587	-	T	chr1:124297587	-	SINE	intergenic	intergenic_variant	0	0	-	-	-	-	ADAR	0.0588235	2	25	0.08	2	20	0.1	1	40	0.025	0	0	11	0	0	23	0	0	34	0	0.0185185	0	13	0	1	24	0.0416667	0	17	0
chr1	124297588	-	T	chr1:124297588	-	SINE	intergenic	intergenic_variant	0	0	-	-	-	-	ADAR	0.0581395	2	25	0.08	1	21	0.047619	2	40	0.05	0	0	13	0	0	23	0	0	28	0	0.0192308	0	13	0	1	24	0.0416667	0	15	0
chr1	124305877	-	T	chr1:124305877	-	SINE	intergenic	intergenic_variant	0	0	-	-	-	-	ADARB1	0.117073	3	44	0.0681818	11	76	0.144737	10	85	0.117647	0	0	57	0	0	73	0	0	30	0	0	0	23	0	0	21	0	0	22	0
chr1	124305880	-	T	chr1:124305880	-	SINE	intergenic	intergenic_variant	0	0	-	-	-	-	ADAR	0.34359	13	43	0.302326	27	72	0.375	27	80	0.3375	0	0	58	0	0	73	0	0	6	0	0.0322581	0	21	0	2	20	0.1	0	21	0
chr1	124305881	-	T	chr1:124305881	-	SINE	intergenic	intergenic_variant	0	0	-	-	-	-	ADAR	0.0410256	3	43	0.0697674	2	73	0.0273973	3	79	0.0379747	0	0	60	0	0	73	0	0	17	0	0.0327869	2	21	0.0952381	0	20	0	0	20	0
chr1	124308704	-	T	chr1:124308704	-	LINE	intergenic	intergenic_variant	0	0	-	-	-	-	ADAR	0.285714	1	5	0.2	2	2	1	1	7	0.142857	0	0	4	0	0	5	0	0	20	0	0.166667	1	2	0.5	0	0	NA	0	4	0
chr1	124308760	-	T	chr1:124308760	-	LINE	intergenic	intergenic_variant	0	0	-	-	-	-	ADARB1	0.272727	2	3	0.666667	1	1	1	0	7	0	0	0	4	0	0	2	0	0	35	0	0	0	1	0	0	0	NA	0	1	0
chr1	124308771	-	T	chr1:124308771	-	LINE	intergenic	intergenic_variant	0	0	-	-	-	-	ADAR	0.333333	2	3	0.666667	3	4	0.75	0	8	0	0	0	6	0	0	4	0	0	20	0	0.333333	1	2	0.5	0	0	NA	0	1	0
chr1	124312518	-	T	chr1:124312518	-	LINE	intergenic	intergenic_variant	0	0	-	-	-	-	ADAR	0.241379	2	9	0.222222	3	8	0.375	2	12	0.166667	0	0	15	0	0	4	0	0	25	0	0.333333	7	12	0.583333	0	6	0	0	3	0
chr1	124312521	-	T	chr1:124312521	-	LINE	intergenic	intergenic_variant	0	0	-	-	-	-	ADAR	0.275862	2	9	0.222222	3	8	0.375	3	12	0.25	0	0	15	0	0	4	0	0	26	0	0.190476	4	12	0.333333	0	6	0	0	3	0
chr1	124325743	-	T	chr1:124325743	-	LTR	intergenic	intergenic_variant	0	0	-	-	-	-	ADARB1	0.0322581	3	45	0.0666667	2	71	0.028169	1	70	0.0142857	0	0	44	0	0	58	0	0	70	0	0	0	12	0	0	16	0	0	13	0
chr1	124325764	-	T	chr1:124325764	-	LTR	intergenic	intergenic_variant	0	0	-	-	-	-	ADAR	0.0393258	1	40	0.025	3	66	0.0454545	3	72	0.0416667	0	0	48	0	0	55	0	0	70	0	0.0212766	0	14	0	0	19	0	1	14	0.0714286
chr1	124325767	-	T	chr1:124325767	-	LTR	intergenic	intergenic_variant	0	0	-	-	-	-	ADAR	0.0824176	3	42	0.0714286	8	69	0.115942	4	71	0.056338	0	0	47	0	0	56	0	0	69	0	0.0217391	0	14	0	1	18	0.0555556	0	14	0
chr1	124325776	-	T	chr1:124325776	-	LTR	intergenic	intergenic_variant	0	0	-	-	-	-	ADAR	0.26601	13	43	0.302326	18	74	0.243243	23	86	0.267442	0	0	57	0	0	62	0	0	6	0	0.0666667	0	14	0	0	18	0	3	13	0.230769
chr1	124325791	-	T	chr1:124325791	-	LTR	intergenic	intergenic_variant	0	0	-	-	-	-	ADAR	0.0954545	4	49	0.0816327	9	80	0.1125	8	91	0.0879121	0	0	58	0	0	71	0	0	6	0	0.0769231	2	18	0.111111	1	21	0.047619	1	13	0.0769231
chr1	124325857	-	T	chr1:124325857	-	LTR	intergenic	intergenic_variant	0	0	-	-	-	-	ADAR	0.0386266	2	57	0.0350877	2	79	0.0253165	5	97	0.0515464	0	0	55	0	0	66	0	0	6	0	0.1	2	22	0.0909091	0	18	0	3	10	0.3
chr1	124326824	-	T	chr1:124326824	-	LTR	intergenic	intergenic_variant	0	0	-	-	-	-	ADAR	0.257669	12	56	0.214286	9	40	0.225	21	67	0.313433	0	0	50	0	0	52	0	0	7	0	0.315789	8	25	0.32	5	16	0.3125	5	16	0.3125
chr1	124326843	-	T	chr1:124326843	-	LTR	intergenic	intergenic_variant	0	0	-	-	-	-	ADARB1	0.0552147	6	59	0.101695	1	34	0.0294118	2	70	0.0285714	0	0	46	0	0	49	0	0	9	0	0	0	28	0	0	16	0	0	17	0
chr1	124326895	-	T	chr1:124326895	-	LTR	intergenic	intergenic_variant	0	0	124325790	1105	downstream	undefined	ADARB1	0.0974026	7	52	0.134615	2	37	0.0540541	6	65	0.0923077	0	0	44	0	0	46	0	0	73	0	0	0	33	0	0	15	0	0	14	0
chr1	124326915	-	T	chr1:124326915	-	LTR	intergenic	intergenic_variant	0	0	-	-	-	-	ADARB1	0.0584416	1	51	0.0196078	3	38	0.0789474	5	65	0.0769231	0	0	38	0	0	43	0	0	72	0	0	0	34	0	0	11	0	0	15	0
chr1	124326916	-	T	chr1:124326916	-	LTR	intergenic	intergenic_variant	0	0	-	-	-	-	ADAR	0.122581	8	51	0.156863	0	37	0	11	67	0.164179	0	0	37	0	0	44	0	0	73	0	0.15	4	34	0.117647	1	11	0.0909091	4	15	0.266667
chr1	124326921	-	T	chr1:124326921	-	LTR	intergenic	intergenic_variant	0	0	-	-	-	-	ADAR	0.633333	32	50	0.64	21	36	0.583333	42	64	0.65625	0	0	37	0	0	46	0	0	75	0	0.466667	11	33	0.333333	7	10	0.7	10	17	0.588235
chr1	124326937	-	T	chr1:124326937	-	LTR	intergenic	intergenic_variant	0	0	124325748	1189	downstream	undefined	ADAR	0.104478	4	48	0.0833333	2	32	0.0625	8	54	0.148148	0	0	34	0	0	39	0	0	73	0	0.125	6	35	0.171429	0	11	0	2	18	0.111111
chr1	124332327	-	T	chr1:124332327	-	SINE	intergenic	intergenic_variant	0	0	124333807	1480	upstream	undefined	ADARB1	0.0614035	1	32	0.03125	2	36	0.0555556	4	46	0.0869565	0	0	34	0	0	44	0	0	57	0	0	0	25	0	0	7	0	0	9	0
chr1	124345451	-	T	chr1:124345451	-	LINE	intergenic	intergenic_variant	0	0	-	-	-	-	ADAR	0.0444444	3	40	0.075	3	45	0.0666667	0	50	0	0	0	25	0	0	55	0	0	50	0	0.0192308	0	20	0	1	14	0.0714286	0	18	0
chr1	124348326	-	T	chr1:124348326	-	LINE	intergenic	intergenic_variant	0	0	-	-	-	-	ADARB1	0.0420168	2	40	0.05	2	30	0.0666667	1	49	0.0204082	0	0	38	0	0	37	0	0	52	0	0	0	37	0	0	26	0	0	15	0
chr1	124348334	-	T	chr1:124348334	-	LINE	intergenic	intergenic_variant	0	0	-	-	-	-	ADARB1	0.03125	1	42	0.0238095	0	35	0	3	51	0.0588235	0	0	38	0	0	40	0	0	45	0	0	0	38	0	0	26	0	0	16	0
chr1	124348817	-	T	chr1:124348817	-	LINE	intergenic	regulatory_region_variant	0	0	-	-	-	-	ADARB1	0.146939	10	51	0.196078	17	85	0.2	9	109	0.0825688	0	0	81	0	0	117	0	0	49	0	0	0	24	0	0	18	0	0	17	0
chr1	124350971	-	T	chr1:124350971	-	LINE	intergenic	intergenic_variant	0	0	-	-	-	-	ADARB1	0.0882353	0	15	0	2	17	0.117647	4	36	0.111111	0	0	13	0	0	27	0	0	49	0	0	0	14	0	0	13	0	0	11	0
chr1	124371077	-	T	chr1:124371077	Gm38073	SINE	intergenic	downstream_gene_variant	0	0	124370975	102	downstream	undefined	ADAR	0.192308	1	8	0.125	3	9	0.333333	1	9	0.111111	0	0	8	0	0	4	0	0	48	0	0.222222	0	1	0	2	5	0.4	0	3	0
chr1	124371089	-	T	chr1:124371089	Gm38073	SINE	intergenic	downstream_gene_variant	0	0	124370963	126	downstream	undefined	ADARB1	0.4	3	9	0.333333	5	11	0.454545	4	10	0.4	0	0	9	0	0	5	0	0	44	0	0	0	1	0	0	4	0	0	4	0
chr1	124374549	-	T	chr1:124374549	Gm38073	SINE	intergenic	downstream_gene_variant	0	0	-	-	-	-	ADARB1	0.0961538	0	10	0	1	16	0.0625	4	26	0.153846	0	0	15	0	0	20	0	0	29	0	0	0	7	0	0	7	0	0	5	0
chr1	124379315	-	T	chr1:124379315	Gm38073	LINE	intergenic	upstream_gene_variant	0	0	-	-	-	-	ADAR	0.0869565	5	29	0.172414	0	18	0	1	22	0.0454545	0	0	16	0	0	15	0	0	38	0	0.0714286	2	15	0.133333	0	15	0	1	12	0.0833333
chr1	124379339	-	T	chr1:124379339	Gm38073	LINE	intergenic	upstream_gene_variant	0	0	-	-	-	-	ADAR	0.27	11	35	0.314286	5	27	0.185185	11	38	0.289474	0	0	27	0	0	27	0	0	35	0	0.104167	1	17	0.0588235	2	17	0.117647	2	14	0.142857
chr1	124379362	-	T	chr1:124379362	Gm38073	LINE	intergenic	upstream_gene_variant	0	0	-	-	-	-	ADAR	0.0846154	5	44	0.113636	5	37	0.135135	1	49	0.0204082	0	0	41	0	0	34	0	0	35	0	0.0363636	1	20	0.05	1	20	0.05	0	15	0
chr1	124379374	-	T	chr1:124379374	Gm38073	LINE	intergenic	upstream_gene_variant	0	0	124379386	12	upstream	undefined	ADARB1	0.0571429	2	45	0.0444444	2	40	0.05	4	55	0.0727273	0	0	43	0	0	37	0	0	106	0	0	0	21	0	0	21	0	0	15	0
chr1	124379377	-	T	chr1:124379377	Gm38073	LINE	intergenic	upstream_gene_variant	0	0	-	-	-	-	ADARB1	0.0748299	0	49	0	5	42	0.119048	6	56	0.107143	0	0	44	0	0	39	0	0	40	0	0	0	22	0	0	22	0	0	16	0
chr1	124379410	-	T	chr1:124379410	Gm38073	LINE	intergenic	upstream_gene_variant	0	0	-	-	-	-	ADAR	0.245033	16	45	0.355556	10	41	0.243902	11	65	0.169231	0	0	44	0	0	41	0	0	11	0	0.0392157	2	19	0.105263	0	18	0	0	14	0
chr1	124379439	-	T	chr1:124379439	Gm38073	LINE	intergenic	upstream_gene_variant	0	0	-	-	-	-	ADAR	0.123077	4	44	0.0909091	4	35	0.114286	8	51	0.156863	0	0	38	0	0	33	0	0	13	0	0.0666667	2	15	0.133333	0	18	0	1	12	0.0833333
chr1	124379441	-	T	chr1:124379441	Gm38073	LINE	intergenic	upstream_gene_variant	0	0	-	-	-	-	ADAR	0.0465116	3	43	0.0697674	0	35	0	3	51	0.0588235	0	0	41	0	0	35	0	0	13	0	0.0434783	0	16	0	1	18	0.0555556	1	12	0.0833333
chr1	124379466	-	T	chr1:124379466	Gm38073	LINE	intergenic	upstream_gene_variant	0	0	-	-	-	-	ADAR	0.0687023	4	46	0.0869565	2	37	0.0540541	3	48	0.0625	0	0	35	0	0	35	0	0	14	0	0.0204082	0	15	0	0	20	0	1	14	0.0714286
chr1	124379474	-	T	chr1:124379474	Gm38073	LINE	intergenic	upstream_gene_variant	0	0	-	-	-	-	ADARB1	0.0514706	4	46	0.0869565	2	38	0.0526316	1	52	0.0192308	0	0	39	0	0	40	0	0	32	0	0	0	12	0	0	21	0	0	16	0
chr1	124379505	-	T	chr1:124379505	Gm38073	LINE	intergenic	upstream_gene_variant	0	0	-	-	-	-	ADAR	0.028169	3	55	0.0545455	0	36	0	1	51	0.0196078	0	0	42	0	0	35	0	0	42	0	0.0289855	0	22	0	1	25	0.04	1	22	0.0454545
chr1	124379515	-	T	chr1:124379515	Gm38073	LINE	intergenic	upstream_gene_variant	0	0	-	-	-	-	ADARB1	0.0273973	2	57	0.0350877	1	36	0.0277778	1	53	0.0188679	0	0	39	0	0	38	0	0	49	0	0	0	22	0	0	24	0	0	22	0
chr1	124379533	-	T	chr1:124379533	Gm38073	LINE	intergenic	upstream_gene_variant	0	0	-	-	-	-	ADAR	0.275862	14	55	0.254545	8	37	0.216216	18	53	0.339623	0	0	39	0	0	50	0	0	53	0	0.144928	5	23	0.217391	1	24	0.0416667	4	22	0.181818
chr1	124383084	-	T	chr1:124383084	Gm38073	LINE	intergenic	upstream_gene_variant	0	0	-	-	-	-	ADAR	0.0704225	5	31	0.16129	1	32	0.03125	4	79	0.0506329	0	0	46	0	0	41	0	0	61	0	0.0181818	1	32	0.03125	0	14	0	0	9	0
chr1	124383119	-	T	chr1:124383119	Gm38073	LINE	intergenic	upstream_gene_variant	0	0	-	-	-	-	ADARB1	0.0789474	3	28	0.107143	1	42	0.0238095	8	82	0.097561	0	0	52	0	0	54	0	0	59	0	0	0	30	0	0	14	0	0	6	0
chr1	124383158	-	T	chr1:124383158	Gm38073	LINE	intergenic	upstream_gene_variant	0	0	-	-	-	-	ADAR	0.0666667	2	23	0.0869565	4	42	0.0952381	3	70	0.0428571	0	0	44	0	0	40	0	0	59	0	0.147059	3	23	0.130435	2	9	0.222222	0	2	0
chr1	124383174	-	T	chr1:124383174	Gm38073	LINE	intergenic	upstream_gene_variant	0	0	-	-	-	-	ADAR	0.15	4	21	0.190476	4	40	0.1	10	59	0.169492	0	0	39	0	0	38	0	0	55	0	0.0666667	0	18	0	2	9	0.222222	0	3	0
chr1	124383182	-	T	chr1:124383182	Gm38073	LINE	intergenic	upstream_gene_variant	0	0	-	-	-	-	ADARB1	0.0535714	1	21	0.047619	0	34	0	5	57	0.0877193	0	0	36	0	0	32	0	0	59	0	0	0	18	0	0	8	0	0	1	0
chr1	124383189	-	T	chr1:124383189	Gm38073	LINE	intergenic	upstream_gene_variant	0	0	-	-	-	-	ADARB1	0.0576923	1	18	0.0555556	2	32	0.0625	3	54	0.0555556	0	0	32	0	0	32	0	0	47	0	0	0	18	0	0	7	0	0	1	0
chr1	124383209	-	T	chr1:124383209	Gm38073	LINE	intergenic	upstream_gene_variant	0	0	-	-	-	-	ADARB1	0.0574713	3	18	0.166667	2	31	0.0645161	0	38	0	0	0	25	0	0	32	0	0	45	0	0	0	14	0	0	7	0	0	2	0
chr1	124383230	-	T	chr1:124383230	Gm38073	LINE	intergenic	upstream_gene_variant	0	0	-	-	-	-	ADAR	0.173913	4	18	0.222222	2	22	0.0909091	6	29	0.206897	0	0	19	0	0	28	0	0	42	0	0.0666667	1	10	0.1	0	4	0	0	1	0
chr1	124383236	-	T	chr1:124383236	Gm38073	LINE	intergenic	upstream_gene_variant	0	0	-	-	-	-	ADAR	0.619048	10	17	0.588235	15	21	0.714286	14	25	0.56	0	0	15	0	0	20	0	0	69	0	0.571429	6	9	0.666667	2	4	0.5	0	1	0
chr1	124417462	-	T	chr1:124417462	-	.	intergenic	intergenic_variant	0	0	124417799	337	upstream	undefined	ADAR	0.294872	7	19	0.368421	9	25	0.36	7	34	0.205882	0	0	16	0	0	14	0	0	76	0	0.310345	3	9	0.333333	4	8	0.5	2	12	0.166667
chr1	124463513	-	T	chr1:124463513	-	SINE	intergenic	intergenic_variant	1	1	124463174	339	downstream	undefined	ADAR	0.0814815	3	38	0.0789474	6	43	0.139535	2	54	0.037037	0	0	42	0	0	36	0	0	59	0	0.0377358	1	22	0.0454545	1	16	0.0625	0	15	0
chr1	124463536	-	T	chr1:124463536	-	SINE	intergenic	intergenic_variant	0	0	-	-	-	-	ADARB1	0.0510949	0	34	0	1	48	0.0208333	6	55	0.109091	0	0	41	0	0	43	0	0	48	0	0	0	18	0	0	13	0	0	10	0
chr1	124463547	-	T	chr1:124463547	-	SINE	intergenic	intergenic_variant	0	0	-	-	-	-	ADARB1	0.171642	3	35	0.0857143	12	41	0.292683	8	58	0.137931	0	0	33	0	0	44	0	0	45	0	0	0	18	0	0	13	0	0	10	0
chr1	124466433	-	T	chr1:124466433	-	LINE	intergenic	intergenic_variant	0	0	124463977	2456	downstream	undefined	ADARB1	0.0555556	1	21	0.047619	1	21	0.047619	2	30	0.0666667	0	0	23	0	0	18	0	0	42	0	0	0	12	0	0	16	0	0	14	0
chr1	124466434	-	T	chr1:124466434	-	LINE	intergenic	intergenic_variant	0	0	124463976	2458	downstream	undefined	ADARB1	0.108108	2	20	0.1	4	23	0.173913	2	31	0.0645161	0	0	22	0	0	19	0	0	34	0	0	0	12	0	0	15	0	0	15	0
chr1	124466511	-	T	chr1:124466511	-	LINE	intergenic	intergenic_variant	0	0	-	-	-	-	ADARB1	0.0434783	0	24	0	2	28	0.0714286	2	40	0.05	0	0	27	0	0	20	0	0	27	0	0	0	11	0	0	10	0	0	13	0
chr1	124466608	-	T	chr1:124466608	-	LINE	intergenic	intergenic_variant	0	0	-	-	-	-	ADAR	0.0769231	4	21	0.190476	1	18	0.0555556	0	26	0	0	0	24	0	0	28	0	0	24	0	0.1	2	13	0.153846	1	9	0.111111	0	8	0
chr1	124481772	-	T	chr1:124481772	-	LINE	intergenic	intergenic_variant	0	0	-	-	-	-	ADARB1	0.0441176	1	30	0.0333333	2	44	0.0454545	3	62	0.0483871	0	0	45	0	0	43	0	0	23	0	0	0	22	0	0	30	0	0	14	0
chr1	124490915	-	T	chr1:124490915	Gm25578	snRNA	Exon	non_coding_transcript_exon_variant	0	0	-	-	-	-	ADARB1	0.15493	2	19	0.105263	2	15	0.133333	7	37	0.189189	0	0	32	0	0	31	0	0	51	0	0	0	19	0	0	16	0	0	17	0
chr1	124501696	-	T	chr1:124501696	Gm28928	LINE	intergenic	downstream_gene_variant	0	0	-	-	-	-	ADAR	0.0238095	0	23	0	1	38	0.0263158	2	65	0.0307692	0	0	38	0	0	50	0	0	52	0	0.0810811	3	39	0.0769231	2	20	0.1	1	15	0.0666667
chr1	124501994	-	T	chr1:124501994	Gm28928	LINE	intergenic	downstream_gene_variant	0	0	-	-	-	-	ADARB1	0.044898	6	65	0.0923077	1	61	0.0163934	4	119	0.0336134	0	0	61	0	0	59	0	0	52	0	0	0	68	0	0	49	0	0	28	0
chr1	124502026	-	T	chr1:124502026	Gm28928	LINE	intergenic	downstream_gene_variant	0	0	-	-	-	-	ADARB1	0.028	4	80	0.05	1	63	0.015873	2	107	0.0186916	0	0	70	0	0	60	0	0	23	0	0	0	62	0	0	49	0	0	34	0
chr1	124518861	-	T	chr1:124518861	Gm28928	LINE	Intron	non_coding_transcript_variant	0	0	124520703	1842	upstream	intronic	ADARB1	0.0526316	1	45	0.0222222	0	33	0	5	36	0.138889	0	0	29	0	0	28	0	0	23	0	0	0	25	0	0	7	0	0	13	0
chr1	124518883	-	T	chr1:124518883	Gm28928	LINE	Intron	non_coding_transcript_variant	0	0	124520681	1798	upstream	intronic	ADAR	0.0789474	3	43	0.0697674	5	37	0.135135	1	34	0.0294118	0	0	31	0	0	30	0	0	32	0	0.117647	3	17	0.176471	0	8	0	1	9	0.111111
chr1	124518989	-	T	chr1:124518989	Gm28928	LINE	Intron	non_coding_transcript_variant	0	0	124520576	1587	upstream	intronic	ADARB1	0.0655738	6	43	0.139535	2	38	0.0526316	0	41	0	0	0	37	0	0	36	0	0	36	0	0	0	14	0	0	9	0	0	9	0
chr1	124525761	-	T	chr1:124525761	Gm28928	LINE	Intron	non_coding_transcript_variant	0	0	-	-	-	-	ADARB1	0.0409091	1	43	0.0232558	6	67	0.0895522	2	110	0.0181818	0	0	47	0	0	59	0	0	49	0	0	0	18	0	0	12	0	0	13	0
chr1	124536320	-	T	chr1:124536320	Gm28928	SINE	Intron	non_coding_transcript_variant	0	0	-	-	-	-	ADAR	0.184615	2	8	0.25	5	20	0.25	5	37	0.135135	0	0	30	0	0	20	0	0	38	0	0.212121	3	15	0.2	0	12	0	4	6	0.666667
chr1	124536322	-	T	chr1:124536322	Gm28928	SINE	Intron	non_coding_transcript_variant	0	0	-	-	-	-	ADAR	0.516129	3	8	0.375	8	17	0.470588	21	37	0.567568	0	0	28	0	0	21	0	0	56	0	0.457143	7	16	0.4375	4	13	0.307692	5	6	0.833333
chr1	124540396	-	T	chr1:124540396	Gm28928	LTR	Intron	non_coding_transcript_variant	0	0	-	-	-	-	ADARB1	0.032967	1	26	0.0384615	1	21	0.047619	1	44	0.0227273	0	0	16	0	0	34	0	0	72	0	0	0	24	0	0	16	0	0	8	0
chr1	124547148	-	T	chr1:124547148	Gm28928	LINE	Intron	non_coding_transcript_variant	0	0	-	-	-	-	ADARB1	0.0438596	2	19	0.105263	2	40	0.05	1	55	0.0181818	0	0	24	0	0	42	0	0	80	0	0	0	14	0	0	6	0	0	11	0
chr1	124548027	-	T	chr1:124548027	Gm28928	LTR	Intron	non_coding_transcript_variant	0	0	-	-	-	-	ADAR	0.0444444	1	45	0.0222222	0	22	0	5	68	0.0735294	0	0	33	0	0	34	0	0	21	0	0.0151515	0	23	0	1	20	0.05	0	23	0
chr1	124548043	-	T	chr1:124548043	Gm28928	LTR	Intron	non_coding_transcript_variant	0	0	-	-	-	-	ADAR	0.100719	5	35	0.142857	2	31	0.0645161	7	73	0.0958904	0	0	43	0	0	39	0	0	30	0	0.107143	1	21	0.047619	0	16	0	5	19	0.263158
chr1	124558504	-	T	chr1:124558504	Gm28928	SINE	Intron	non_coding_transcript_variant	0	0	-	-	-	-	ADAR	0.0357143	0	61	0	6	83	0.0722892	3	108	0.0277778	0	0	76	0	0	119	0	0	51	0	0.0744681	1	36	0.0277778	5	30	0.166667	1	28	0.0357143
chr1	124570822	-	T	chr1:124570822	Gm28928	LINE	Intron	non_coding_transcript_variant	0	0	-	-	-	-	ADAR	0.403846	4	9	0.444444	9	23	0.391304	8	20	0.4	0	0	7	0	0	29	0	0	53	0	0.0576923	2	25	0.08	1	13	0.0769231	0	14	0
chr1	124570840	-	T	chr1:124570840	Gm28928	LINE	Intron	non_coding_transcript_variant	0	0	124572037	1197	upstream	intronic	ADARB1	0.465753	5	13	0.384615	16	30	0.533333	13	30	0.433333	0	0	9	0	0	36	0	0	46	0	0	0	28	0	0	17	0	0	14	0
chr1	124570850	-	T	chr1:124570850	Gm28928	LINE	Intron	non_coding_transcript_variant	0	0	124572019	1169	upstream	intronic	ADAR	0.341463	6	18	0.333333	13	31	0.419355	9	33	0.272727	0	0	12	0	0	39	0	0	45	0	0.0588235	3	33	0.0909091	1	19	0.0526316	0	16	0
chr1	124570856	-	T	chr1:124570856	Gm28928	LINE	Intron	non_coding_transcript_variant	0	0	124572012	1156	upstream	intronic	ADARB1	0.0888889	4	22	0.181818	1	32	0.03125	3	36	0.0833333	0	0	12	0	0	41	0	0	27	0	0	0	37	0	0	21	0	0	19	0
chr1	124570872	-	T	chr1:124570872	Gm28928	LINE	Intron	non_coding_transcript_variant	0	0	124571996	1124	upstream	intronic	ADAR	0.33913	8	25	0.32	20	45	0.444444	11	45	0.244444	0	0	20	0	0	49	0	0	35	0	0.0116279	0	39	0	1	24	0.0416667	0	23	0
chr1	124570881	-	T	chr1:124570881	Gm28928	LINE	Intron	non_coding_transcript_variant	0	0	124571989	1108	upstream	intronic	ADAR	0.057971	4	29	0.137931	0	49	0	4	60	0.0666667	0	0	22	0	0	57	0	0	49	0	0.032967	3	39	0.0769231	0	30	0	0	22	0
chr1	124570889	-	T	chr1:124570889	Gm28928	LINE	Intron	non_coding_transcript_variant	0	0	-	-	-	-	ADAR	0.0945946	5	31	0.16129	5	54	0.0925926	4	63	0.0634921	0	0	24	0	0	59	0	0	55	0	0.0744681	4	39	0.102564	1	30	0.0333333	2	25	0.08
chr1	124570897	-	T	chr1:124570897	Gm28928	LINE	Intron	non_coding_transcript_variant	0	0	-	-	-	-	ADAR	0.186747	10	35	0.285714	5	60	0.0833333	16	71	0.225352	0	0	27	0	0	61	0	0	90	0	0.15	5	40	0.125	4	31	0.129032	6	29	0.206897
chr1	124571644	-	T	chr1:124571644	Gm28928	LINE	Intron	non_coding_transcript_variant	0	0	-	-	-	-	ADAR	0.0790514	1	52	0.0192308	11	98	0.112245	8	103	0.0776699	0	0	69	0	0	73	0	0	22	0	0.0875	3	32	0.09375	4	28	0.142857	0	20	0
chr1	124571661	-	T	chr1:124571661	Gm28928	LINE	Intron	non_coding_transcript_variant	0	0	-	-	-	-	ADAR	0.15415	5	51	0.0980392	20	97	0.206186	14	105	0.133333	0	0	74	0	0	68	0	0	26	0	0.164706	4	33	0.121212	10	30	0.333333	0	22	0
chr1	124571713	-	T	chr1:124571713	Gm28928	LINE	Intron	non_coding_transcript_variant	0	0	-	-	-	-	ADAR	0.0376569	2	42	0.047619	4	99	0.040404	3	98	0.0306122	0	0	73	0	0	54	0	0	29	0	0.0526316	2	33	0.0606061	2	26	0.0769231	0	17	0
chr1	124571714	-	T	chr1:124571714	Gm28928	LINE	Intron	non_coding_transcript_variant	0	0	-	-	-	-	ADAR	0.0334728	1	42	0.0238095	5	99	0.0505051	2	98	0.0204082	0	0	75	0	0	54	0	0	32	0	0.0135135	0	31	0	1	26	0.0384615	0	17	0
chr1	124571777	-	T	chr1:124571777	Gm28928	LINE	Intron	non_coding_transcript_variant	0	0	-	-	-	-	ADAR	0.0618557	3	44	0.0681818	3	67	0.0447761	6	83	0.0722892	0	0	57	0	0	43	0	0	40	0	0.1125	3	37	0.0810811	3	27	0.111111	3	16	0.1875
chr1	124571790	-	T	chr1:124571790	Gm28928	LINE	Intron	non_coding_transcript_variant	0	0	-	-	-	-	ADAR	0.062201	2	47	0.0425532	1	68	0.0147059	10	94	0.106383	0	0	56	0	0	48	0	0	45	0	0.0235294	1	39	0.025641	1	25	0.04	0	21	0
chr1	124571972	-	T	chr1:124571972	Gm28928	LINE	Intron	non_coding_transcript_variant	0	0	-	-	-	-	ADAR	0.211382	9	41	0.219512	7	36	0.194444	10	46	0.217391	0	0	47	0	0	66	0	0	50	0	0.0746269	3	24	0.125	0	9	0	2	34	0.0588235
chr1	124571993	-	T	chr1:124571993	Gm28928	LINE	Intron	non_coding_transcript_variant	0	0	124570875	1118	downstream	intronic	ADARB1	0.268519	11	38	0.289474	5	27	0.185185	13	43	0.302326	0	0	42	0	0	63	0	0	54	0	0	0	24	0	0	10	0	0	37	0
chr1	124572008	-	T	chr1:124572008	Gm28928	LINE	Intron	non_coding_transcript_variant	0	0	124570860	1148	downstream	intronic	ADAR	0.828283	26	33	0.787879	22	26	0.846154	34	40	0.85	0	0	44	0	0	62	0	0	91	0	0.771429	23	29	0.793103	7	11	0.636364	24	30	0.8
chr1	124572009	-	T	chr1:124572009	Gm28928	LINE	Intron	non_coding_transcript_variant	0	0	124570859	1150	downstream	intronic	ADAR	0.23	4	32	0.125	9	27	0.333333	10	41	0.243902	0	0	43	0	0	64	0	0	90	0	0.0810811	5	32	0.15625	0	11	0	1	31	0.0322581
chr1	124572011	-	T	chr1:124572011	Gm28928	LINE	Intron	non_coding_transcript_variant	0	0	124570857	1154	downstream	intronic	ADARB1	0.319588	11	32	0.34375	8	26	0.307692	12	39	0.307692	0	0	40	0	0	61	0	0	98	0	0	0	32	0	0	10	0	0	29	0
chr1	124572018	-	T	chr1:124572018	Gm28928	LINE	Intron	non_coding_transcript_variant	0	0	124570850	1168	downstream	intronic	ADARB1	0.108696	3	29	0.103448	2	25	0.08	5	38	0.131579	0	0	42	0	0	66	0	0	98	0	0	0	34	0	0	9	0	0	28	0
chr1	124572037	-	T	chr1:124572037	Gm28928	LINE	Intron	non_coding_transcript_variant	0	0	-	-	-	-	ADAR	0.108911	2	28	0.0714286	0	26	0	9	47	0.191489	0	0	36	0	0	77	0	0	55	0	0.027027	1	35	0.0285714	0	11	0	1	28	0.0357143
chr1	124572038	-	T	chr1:124572038	Gm28928	LINE	Intron	non_coding_transcript_variant	0	0	-	-	-	-	ADAR	0.166667	2	30	0.0666667	7	24	0.291667	8	48	0.166667	0	0	35	0	0	74	0	0	51	0	0.012987	1	37	0.027027	0	11	0	0	29	0
chr1	124572043	-	T	chr1:124572043	Gm28928	LINE	Intron	non_coding_transcript_variant	0	0	-	-	-	-	ADAR	0.479167	12	27	0.444444	16	26	0.615385	18	43	0.418605	0	0	38	0	0	74	0	0	55	0	0.554054	17	34	0.5	8	11	0.727273	16	29	0.551724
chr1	124572055	-	T	chr1:124572055	Gm28928	LINE	Intron	non_coding_transcript_variant	0	0	-	-	-	-	ADAR	0.19	3	28	0.107143	6	24	0.25	10	48	0.208333	0	0	39	0	0	78	0	0	54	0	0.0895522	4	31	0.129032	0	11	0	2	25	0.08
chr1	124572065	-	T	chr1:124572065	Gm28928	LINE	Intron	non_coding_transcript_variant	0	0	124570803	1262	downstream	intronic	ADAR	0.0612245	0	27	0	5	23	0.217391	1	48	0.0208333	0	0	41	0	0	74	0	0	50	0	0.212121	7	31	0.225806	0	12	0	7	23	0.304348
chr1	124572067	-	T	chr1:124572067	Gm28928	LINE	Intron	non_coding_transcript_variant	0	0	124570802	1265	downstream	intronic	ADAR	0.191919	7	25	0.28	5	25	0.2	7	49	0.142857	0	0	38	0	0	72	0	0	43	0	0.078125	2	30	0.0666667	0	11	0	3	23	0.130435
chr1	124572075	-	T	chr1:124572075	Gm28928	LINE	Intron	non_coding_transcript_variant	0	0	124570794	1281	downstream	intronic	ADAR	0.0776699	2	27	0.0740741	2	25	0.08	4	51	0.0784314	0	0	38	0	0	68	0	0	43	0	0.0454545	2	30	0.0666667	0	12	0	1	24	0.0416667
chr1	124572203	-	T	chr1:124572203	Gm28928	LINE	Intron	non_coding_transcript_variant	0	0	-	-	-	-	ADAR	0.131579	0	14	0	4	10	0.4	1	14	0.0714286	0	0	10	0	0	11	0	0	43	0	0.2	4	23	0.173913	4	12	0.333333	4	25	0.16
chr1	124581531	-	T	chr1:124581531	Gm28928	LINE	Intron	non_coding_transcript_variant	0	0	-	-	-	-	ADAR	0.0508475	4	30	0.133333	2	39	0.0512821	0	49	0	0	0	25	0	0	45	0	0	46	0	0.0117647	0	36	0	0	32	0	1	17	0.0588235
chr1	124596100	-	T	chr1:124596100	Gm28928	LTR	Intron	non_coding_transcript_variant	0	0	-	-	-	-	ADAR	0.0978723	6	82	0.0731707	9	71	0.126761	8	82	0.097561	0	0	58	0	0	55	0	0	54	0	0.010989	1	40	0.025	0	22	0	0	29	0
chr1	124602644	-	T	chr1:124602644	Gm28928	LINE	Intron	non_coding_transcript_variant	0	0	-	-	-	-	ADAR	0.0239726	1	79	0.0126582	3	90	0.0333333	3	123	0.0243902	0	0	71	0	0	57	0	0	54	0	0.01	1	46	0.0217391	0	32	0	0	22	0
chr1	124612434	-	T	chr1:124612434	Gm28299,Gm28928	LTR	Intron	non_coding_transcript_variant	0	0	124613194	760	upstream	intronic	ADAR	0.121622	6	46	0.130435	6	59	0.101695	15	117	0.128205	0	0	70	0	0	59	0	0	54	0	0.115702	9	57	0.157895	2	35	0.0571429	3	29	0.103448
chr1	124612436	-	T	chr1:124612436	Gm28299,Gm28928	LTR	Intron	non_coding_transcript_variant	0	0	124613193	757	upstream	intronic	ADAR	0.0869565	1	53	0.0188679	3	62	0.0483871	16	115	0.13913	0	0	71	0	0	60	0	0	55	0	0.0992366	6	64	0.09375	2	37	0.0540541	5	30	0.166667
chr1	124612438	-	T	chr1:124612438	Gm28299,Gm28928	LTR	Intron	non_coding_transcript_variant	0	0	124611681	757	downstream	Intron	ADAR	0.103734	7	53	0.132075	9	69	0.130435	9	119	0.0756303	0	0	76	0	0	58	0	0	53	0	0.122137	7	63	0.111111	6	37	0.162162	3	31	0.0967742
chr1	124612442	-	T	chr1:124612442	Gm28299,Gm28928	LTR	Intron	non_coding_transcript_variant	0	0	-	-	-	-	ADAR	0.228916	15	62	0.241935	20	69	0.289855	22	118	0.186441	0	0	78	0	0	55	0	0	50	0	0.230769	18	72	0.25	6	38	0.157895	9	33	0.272727
chr1	124612443	-	T	chr1:124612443	Gm28299,Gm28928	LTR	Intron	non_coding_transcript_variant	0	0	-	-	-	-	ADAR	0.110672	6	62	0.0967742	7	70	0.1	15	121	0.123967	0	0	81	0	0	59	0	0	45	0	0.0277778	2	71	0.028169	1	40	0.025	1	33	0.030303
chr1	124612568	-	T	chr1:124612568	Gm28299,Gm28928	LTR	Intron	non_coding_transcript_variant	0	0	-	-	-	-	ADAR	0.110619	8	54	0.148148	7	68	0.102941	10	104	0.0961538	0	0	73	0	0	72	0	0	17	0	0.00909091	1	50	0.02	0	31	0	0	29	0
chr1	124612571	-	T	chr1:124612571	Gm28299,Gm28928	LTR	Intron	non_coding_transcript_variant	0	0	-	-	-	-	ADARB1	0.0340426	0	56	0	2	73	0.0273973	6	106	0.0566038	0	0	78	0	0	77	0	0	36	0	0	0	52	0	0	33	0	0	26	0
chr1	124612587	-	T	chr1:124612587	Gm28299,Gm28928	LTR	Intron	non_coding_transcript_variant	0	0	-	-	-	-	ADAR	0.117647	7	53	0.132075	7	62	0.112903	12	106	0.113208	0	0	70	0	0	62	0	0	63	0	0.110092	5	53	0.0943396	2	29	0.0689655	5	27	0.185185
chr1	124612594	-	T	chr1:124612594	Gm28299,Gm28928	LTR	Intron	non_coding_transcript_variant	0	0	-	-	-	-	ADAR	0.086758	8	51	0.156863	4	64	0.0625	7	104	0.0673077	0	0	68	0	0	63	0	0	96	0	0.145455	6	51	0.117647	8	32	0.25	2	27	0.0740741
chr1	124613029	-	T	chr1:124613029	Gm28299,Gm28928	LTR	Intron	non_coding_transcript_variant	0	0	-	-	-	-	ADAR	0.265018	17	69	0.246377	34	92	0.369565	24	122	0.196721	0	0	63	0	0	91	0	0	83	0	0.040404	1	48	0.0208333	0	24	0	3	27	0.111111
chr1	124619335	-	T	chr1:124619335	Gm28299,Gm28928	SINE	Intron	non_coding_transcript_variant	0	0	-	-	-	-	ADAR	0.0622407	3	49	0.0612245	5	74	0.0675676	7	118	0.059322	0	0	47	0	0	79	0	0	82	0	0.0487805	1	41	0.0243902	3	25	0.12	0	16	0
chr1	124626898	-	T	chr1:124626898	Gm28928	LINE	Intron	non_coding_transcript_variant	0	0	-	-	-	-	ADARB1	0.046875	1	42	0.0238095	1	25	0.04	4	61	0.0655738	0	0	38	0	0	43	0	0	83	0	0	0	13	0	0	14	0	0	16	0
chr1	124626932	-	T	chr1:124626932	Gm28928	LINE	Intron	non_coding_transcript_variant	0	0	-	-	-	-	ADARB1	0.0695652	4	33	0.121212	2	26	0.0769231	2	56	0.0357143	0	0	44	0	0	47	0	0	85	0	0	0	11	0	0	12	0	0	11	0
chr1	124626933	-	T	chr1:124626933	Gm28928	LINE	Intron	non_coding_transcript_variant	0	0	-	-	-	-	ADAR	0.295652	12	33	0.363636	7	27	0.259259	15	55	0.272727	0	0	44	0	0	52	0	0	84	0	0.0571429	2	12	0.166667	0	12	0	0	11	0
chr1	124626968	-	T	chr1:124626968	Gm28928	LINE	Intron	non_coding_transcript_variant	0	0	-	-	-	-	ADARB1	0.162162	3	22	0.136364	0	31	0	15	58	0.258621	0	0	41	0	0	57	0	0	75	0	0	0	13	0	0	10	0	0	7	0
chr1	124627003	-	T	chr1:124627003	Gm28928	LINE	Intron	non_coding_transcript_variant	0	0	-	-	-	-	ADAR	0.207143	6	33	0.181818	10	41	0.243902	13	66	0.19697	0	0	55	0	0	61	0	0	77	0	0.134615	6	25	0.24	0	13	0	1	14	0.0714286
chr1	124627015	-	T	chr1:124627015	Gm28928	LINE	Intron	non_coding_transcript_variant	0	0	-	-	-	-	ADAR	0.0529801	3	39	0.0769231	4	47	0.0851064	1	65	0.0153846	0	0	54	0	0	65	0	0	77	0	0.0517241	2	29	0.0689655	0	12	0	1	17	0.0588235
chr1	124627035	-	T	chr1:124627035	Gm28928	LINE	Intron	non_coding_transcript_variant	0	0	-	-	-	-	ADAR	0.174497	3	45	0.0666667	6	44	0.136364	17	60	0.283333	0	0	55	0	0	72	0	0	75	0	0.0571429	2	35	0.0571429	0	15	0	2	20	0.1
chr1	124627038	-	T	chr1:124627038	Gm28928	LINE	Intron	non_coding_transcript_variant	0	0	-	-	-	-	ADAR	0.516556	23	47	0.489362	22	45	0.488889	33	59	0.559322	0	0	55	0	0	67	0	0	109	0	0.428571	17	36	0.472222	6	14	0.428571	7	20	0.35
chr1	124627051	-	T	chr1:124627051	Gm28928	LINE	Intron	non_coding_transcript_variant	0	0	124626008	1043	downstream	intronic	ADAR	0.0791367	2	45	0.0444444	2	40	0.05	7	54	0.12963	0	0	52	0	0	65	0	0	74	0	0.0595238	4	40	0.1	1	19	0.0526316	0	25	0
chr1	124633437	-	T	chr1:124633437	Gm28928	LINE	Intron	non_coding_transcript_variant	0	0	-	-	-	-	ADARB1	0.12963	5	22	0.227273	0	10	0	2	22	0.0909091	0	0	22	0	0	15	0	0	43	0	0	0	15	0	0	5	0	0	5	0
chr1	124633448	-	T	chr1:124633448	Gm28928	LINE	Intron	non_coding_transcript_variant	0	0	-	-	-	-	ADAR	0.47619	14	25	0.56	4	13	0.307692	12	25	0.48	0	0	24	0	0	20	0	0	40	0	0.607143	10	18	0.555556	4	5	0.8	3	5	0.6
chr1	124633476	-	T	chr1:124633476	Gm28928	LINE	Intron	non_coding_transcript_variant	0	0	-	-	-	-	ADAR	0.045977	1	28	0.0357143	1	17	0.0588235	2	42	0.047619	0	0	32	0	0	24	0	0	40	0	0.0681818	2	21	0.0952381	0	12	0	1	11	0.0909091
chr1	124633486	-	T	chr1:124633486	Gm28928	LINE	Intron	non_coding_transcript_variant	0	0	-	-	-	-	ADAR	0.09	4	33	0.121212	1	20	0.05	4	47	0.0851064	0	0	32	0	0	27	0	0	48	0	0.0185185	0	25	0	1	15	0.0666667	0	14	0
chr1	124633505	-	T	chr1:124633505	Gm28928	LINE	Intron	non_coding_transcript_variant	0	0	-	-	-	-	ADAR	0.221311	14	44	0.318182	3	28	0.107143	10	50	0.2	0	0	35	0	0	33	0	0	55	0	0.136986	5	36	0.138889	3	21	0.142857	2	16	0.125
chr1	124633515	-	T	chr1:124633515	Gm28928	LINE	Intron	non_coding_transcript_variant	0	0	124635960	2445	upstream	intronic	ADAR	0.0894309	6	41	0.146341	3	30	0.1	2	52	0.0384615	0	0	37	0	0	32	0	0	56	0	0.0526316	2	35	0.0571429	2	23	0.0869565	0	18	0
chr1	124633521	-	T	chr1:124633521	Gm28928	LINE	Intron	non_coding_transcript_variant	0	0	124635956	2435	upstream	intronic	ADAR	0.080292	6	48	0.125	3	32	0.09375	2	57	0.0350877	0	0	36	0	0	31	0	0	50	0	0.0789474	2	34	0.0588235	2	24	0.0833333	2	18	0.111111
chr1	124633528	-	T	chr1:124633528	Gm28928	LINE	Intron	non_coding_transcript_variant	0	0	124635948	2420	upstream	intronic	ADAR	0.100629	9	54	0.166667	3	41	0.0731707	4	64	0.0625	0	0	41	0	0	37	0	0	49	0	0.333333	13	38	0.342105	7	23	0.304348	7	20	0.35
chr1	124633529	-	T	chr1:124633529	Gm28928	LINE	Intron	non_coding_transcript_variant	0	0	124635947	2418	upstream	intronic	ADAR	0.31677	18	55	0.327273	15	43	0.348837	18	63	0.285714	0	0	41	0	0	37	0	0	46	0	0.146341	8	37	0.216216	2	25	0.08	2	20	0.1
chr1	124633536	-	T	chr1:124633536	Gm28928	LINE	Intron	non_coding_transcript_variant	0	0	124635941	2405	upstream	intronic	ADAR	0.298137	16	53	0.301887	18	48	0.375	14	60	0.233333	0	0	41	0	0	41	0	0	23	0	0.298851	15	41	0.365854	5	27	0.185185	6	19	0.315789
chr1	124633554	-	T	chr1:124633554	Gm28928	LINE	Intron	non_coding_transcript_variant	0	0	-	-	-	-	ADARB1	0.0634921	4	59	0.0677966	4	57	0.0701754	4	73	0.0547945	0	0	45	0	0	55	0	0	29	0	0	0	44	0	0	35	0	0	22	0
chr1	124633557	-	T	chr1:124633557	Gm28928	LINE	Intron	non_coding_transcript_variant	0	0	-	-	-	-	ADAR	0.0353535	3	62	0.0483871	0	59	0	4	77	0.0519481	0	0	44	0	0	55	0	0	36	0	0.0288462	1	44	0.0227273	0	35	0	2	25	0.08
chr1	124633558	-	T	chr1:124633558	Gm28928	LINE	Intron	non_coding_transcript_variant	0	0	-	-	-	-	ADARB1	0.0412371	3	60	0.05	2	59	0.0338983	3	75	0.04	0	0	44	0	0	53	0	0	37	0	0	0	44	0	0	35	0	0	25	0
chr1	124633567	-	T	chr1:124633567	Gm28928	LINE	Intron	non_coding_transcript_variant	0	0	-	-	-	-	ADAR	0.0346535	0	67	0	3	57	0.0526316	4	78	0.0512821	0	0	45	0	0	50	0	0	46	0	0.00917431	1	46	0.0217391	0	37	0	0	26	0
chr1	124633573	-	T	chr1:124633573	Gm28928	LINE	Intron	non_coding_transcript_variant	0	0	-	-	-	-	ADARB1	0.0338164	2	73	0.0273973	3	57	0.0526316	2	77	0.025974	0	0	46	0	0	50	0	0	38	0	0	0	45	0	0	40	0	0	26	0
chr1	124633576	-	T	chr1:124633576	Gm28928	LINE	Intron	non_coding_transcript_variant	0	0	124635899	2323	upstream	intronic	ADAR	0.201878	16	72	0.222222	13	57	0.22807	14	84	0.166667	0	0	48	0	0	50	0	0	36	0	0.0442478	1	45	0.0222222	2	41	0.0487805	2	27	0.0740741
chr1	124633580	-	T	chr1:124633580	Gm28928	LINE	Intron	non_coding_transcript_variant	0	0	124635896	2316	upstream	intronic	ADAR	0.0857143	10	69	0.144928	3	56	0.0535714	5	85	0.0588235	0	0	46	0	0	49	0	0	40	0	0.0630631	2	46	0.0434783	5	39	0.128205	0	26	0
chr1	124633587	-	T	chr1:124633587	Gm28928	LINE	Intron	non_coding_transcript_variant	0	0	124635890	2303	upstream	intronic	ADARB1	0.135747	10	72	0.138889	10	60	0.166667	10	89	0.11236	0	0	45	0	0	51	0	0	40	0	0	0	46	0	0	39	0	0	24	0
chr1	124633598	-	T	chr1:124633598	Gm28928	LINE	Intron	non_coding_transcript_variant	0	0	-	-	-	-	ADAR	0.117117	7	68	0.102941	10	63	0.15873	9	91	0.0989011	0	0	42	0	0	55	0	0	40	0	0.0490196	0	44	0	3	35	0.0857143	2	23	0.0869565
chr1	124635568	-	T	chr1:124635568	Gm28928	LINE	Intron	non_coding_transcript_variant	0	0	124636035	467	upstream	intronic	ADAR	0.729167	17	19	0.894737	21	36	0.583333	32	41	0.780488	0	0	32	0	0	53	0	0	49	0	0.0454545	0	19	0	1	11	0.0909091	1	14	0.0714286
chr1	124635574	-	T	chr1:124635574	Gm28928	LINE	Intron	non_coding_transcript_variant	0	0	-	-	-	-	ADARB1	0.0537634	3	20	0.15	2	33	0.0606061	0	40	0	0	0	30	0	0	51	0	0	52	0	0	0	16	0	0	13	0	0	14	0
chr1	124635575	-	T	chr1:124635575	Gm28928	LINE	Intron	non_coding_transcript_variant	0	0	124636026	451	upstream	intronic	ADARB1	0.0434783	3	20	0.15	0	33	0	1	39	0.025641	0	0	30	0	0	48	0	0	53	0	0	0	18	0	0	13	0	0	13	0
chr1	124635604	-	T	chr1:124635604	Gm28928	LINE	Intron	non_coding_transcript_variant	0	0	-	-	-	-	ADARB1	0.0412371	3	21	0.142857	1	33	0.030303	0	43	0	0	0	24	0	0	32	0	0	54	0	0	0	14	0	0	14	0	0	10	0
chr1	124635616	-	T	chr1:124635616	Gm28928	LINE	Intron	non_coding_transcript_variant	0	0	-	-	-	-	ADAR	0.043956	2	22	0.0909091	1	32	0.03125	1	37	0.027027	0	0	24	0	0	29	0	0	53	0	0.0588235	2	11	0.181818	0	13	0	0	10	0
chr1	124635638	-	T	chr1:124635638	Gm28928	LINE	Intron	non_coding_transcript_variant	0	0	124635956	318	upstream	intronic	ADARB1	0.337079	8	20	0.4	9	30	0.3	13	39	0.333333	0	0	22	0	0	14	0	0	54	0	0	0	14	0	0	14	0	0	8	0
chr1	124635639	-	T	chr1:124635639	Gm28928	LINE	Intron	non_coding_transcript_variant	0	0	124635956	317	upstream	intronic	ADARB1	0.0842105	1	24	0.0416667	1	32	0.03125	6	39	0.153846	0	0	22	0	0	14	0	0	53	0	0	0	14	0	0	14	0	0	7	0
chr1	124635661	-	T	chr1:124635661	Gm28928	LINE	Intron	non_coding_transcript_variant	0	0	124635933	272	upstream	intronic	ADARB1	0.0654206	0	29	0	3	30	0.1	4	48	0.0833333	0	0	27	0	0	14	0	0	55	0	0	0	19	0	0	14	0	0	9	0
chr1	124635663	-	T	chr1:124635663	Gm28928	LINE	Intron	non_coding_transcript_variant	0	0	124635932	269	upstream	intronic	ADAR	0.252252	8	33	0.242424	8	30	0.266667	12	48	0.25	0	0	28	0	0	14	0	0	60	0	0.0888889	1	20	0.05	1	14	0.0714286	2	11	0.181818
chr1	124635694	-	T	chr1:124635694	Gm28928	LINE	Intron	non_coding_transcript_variant	0	0	-	-	-	-	ADAR	0.206897	11	58	0.189655	10	35	0.285714	9	52	0.173077	0	0	32	0	0	21	0	0	46	0	0.0204082	0	20	0	1	18	0.0555556	0	11	0
chr1	124635696	-	T	chr1:124635696	Gm28928	LINE	Intron	non_coding_transcript_variant	0	0	-	-	-	-	ADAR	0.0328947	2	59	0.0338983	2	36	0.0555556	1	57	0.0175439	0	0	33	0	0	22	0	0	45	0	0.0222222	0	20	0	1	17	0.0588235	0	8	0
chr1	124635705	-	T	chr1:124635705	Gm28928	LINE	Intron	non_coding_transcript_variant	0	0	-	-	-	-	ADAR	0.33758	23	59	0.389831	11	38	0.289474	19	60	0.316667	0	0	35	0	0	23	0	0	43	0	0.0217391	0	18	0	1	17	0.0588235	0	11	0
chr1	124635716	-	T	chr1:124635716	Gm28928	LINE	Intron	non_coding_transcript_variant	0	0	-	-	-	-	ADAR	0.373239	25	57	0.438596	11	34	0.323529	17	51	0.333333	0	0	39	0	0	27	0	0	39	0	0.531915	9	19	0.473684	9	16	0.5625	7	12	0.583333
chr1	124635739	-	T	chr1:124635739	Gm28928	LINE	Intron	non_coding_transcript_variant	0	0	-	-	-	-	ADAR	0.151515	11	64	0.171875	2	41	0.0487805	12	60	0.2	0	0	46	0	0	43	0	0	36	0	0.0377358	0	22	0	2	19	0.105263	0	12	0
chr1	124635748	-	T	chr1:124635748	Gm28928	LINE	Intron	non_coding_transcript_variant	0	0	124635858	110	upstream	intronic	ADAR	0.636905	45	66	0.681818	19	42	0.452381	43	60	0.716667	0	0	50	0	0	46	0	0	31	0	0.388889	6	22	0.272727	10	19	0.526316	5	13	0.384615
chr1	124635750	-	T	chr1:124635750	Gm28928	LINE	Intron	non_coding_transcript_variant	0	0	124635856	106	upstream	intronic	ADAR	0.105263	9	64	0.140625	8	44	0.181818	1	63	0.015873	0	0	51	0	0	46	0	0	31	0	0.0555556	3	22	0.136364	0	19	0	0	13	0
chr1	124635760	-	T	chr1:124635760	Gm28928	LINE	Intron	non_coding_transcript_variant	0	0	-	-	-	-	ADARB1	0.0378378	6	71	0.084507	1	48	0.0208333	0	66	0	0	0	52	0	0	45	0	0	28	0	0	0	19	0	0	20	0	0	13	0
chr1	124635765	-	T	chr1:124635765	Gm28928	LINE	Intron	non_coding_transcript_variant	0	0	-	-	-	-	ADAR	0.121547	9	68	0.132353	2	47	0.0425532	11	66	0.166667	0	0	52	0	0	46	0	0	30	0	0.037037	1	20	0.05	0	21	0	1	13	0.0769231
chr1	124635771	-	T	chr1:124635771	Gm28928	LINE	Intron	non_coding_transcript_variant	0	0	-	-	-	-	ADAR	0.780347	53	69	0.768116	35	43	0.813953	47	61	0.770492	0	0	54	0	0	46	0	0	37	0	0.519231	9	19	0.473684	11	21	0.52381	7	12	0.583333
chr1	124635841	-	T	chr1:124635841	Gm28928	LINE	Intron	non_coding_transcript_variant	0	0	-	-	-	-	ADARB1	0.12381	7	30	0.233333	1	28	0.0357143	5	47	0.106383	0	0	34	0	0	29	0	0	36	0	0	0	14	0	0	12	0	0	7	0
chr1	124635853	-	T	chr1:124635853	Gm28928	LINE	Intron	non_coding_transcript_variant	0	0	-	-	-	-	ADARB1	0.304348	8	27	0.296296	11	24	0.458333	9	41	0.219512	0	0	35	0	0	23	0	0	40	0	0	0	13	0	0	11	0	0	5	0
chr1	124635860	-	T	chr1:124635860	Gm28928	LINE	Intron	non_coding_transcript_variant	0	0	124635746	114	downstream	intronic	ADARB1	0.0705882	3	23	0.130435	1	24	0.0416667	2	38	0.0526316	0	0	39	0	0	12	0	0	37	0	0	0	10	0	0	10	0	0	4	0
chr1	124635869	-	T	chr1:124635869	Gm28928	LINE	Intron	non_coding_transcript_variant	0	0	-	-	-	-	ADAR	0.4875	12	23	0.521739	12	23	0.521739	15	34	0.441176	0	0	39	0	0	13	0	0	52	0	0.615385	9	12	0.75	5	11	0.454545	2	3	0.666667
chr1	124635898	-	T	chr1:124635898	Gm28928	LINE	Intron	non_coding_transcript_variant	0	0	124633578	2320	downstream	intronic	ADARB1	0.0588235	0	11	0	2	23	0.0869565	2	34	0.0588235	0	0	39	0	0	20	0	0	58	0	0	0	7	0	0	8	0	0	4	0
chr1	124635913	-	T	chr1:124635913	Gm28928	LINE	Intron	non_coding_transcript_variant	0	0	-	-	-	-	ADAR	0.0862069	1	12	0.0833333	3	24	0.125	1	22	0.0454545	0	0	37	0	0	24	0	0	58	0	0.352941	4	6	0.666667	2	7	0.285714	0	4	0
chr1	124635920	-	T	chr1:124635920	Gm28928	LINE	Intron	non_coding_transcript_variant	0	0	-	-	-	-	ADAR	0.363636	4	10	0.4	10	23	0.434783	6	22	0.272727	0	0	39	0	0	23	0	0	58	0	0.4	4	7	0.571429	2	6	0.333333	0	2	0
chr1	124635942	-	T	chr1:124635942	Gm28928	LINE	Intron	non_coding_transcript_variant	0	0	124633535	2407	downstream	intronic	ADAR	0.982759	8	8	1	26	26	1	23	24	0.958333	0	0	45	0	0	26	0	0	55	0	0.875	6	7	0.857143	4	5	0.8	4	4	1
chr1	124635943	-	T	chr1:124635943	Gm28928	LINE	Intron	non_coding_transcript_variant	0	0	124633534	2409	downstream	intronic	ADAR	0.95	8	8	1	25	27	0.925926	24	25	0.96	0	0	45	0	0	25	0	0	61	0	0.375	2	8	0.25	3	4	0.75	1	4	0.25
chr1	124635949	-	T	chr1:124635949	Gm28928	LINE	Intron	non_coding_transcript_variant	0	0	124635646	303	downstream	intronic	ADAR	1	9	9	1	26	26	1	31	31	1	0	0	46	0	0	26	0	0	47	0	1	7	7	1	7	7	1	4	4	1
chr1	124635992	-	T	chr1:124635992	Gm28928	LINE	Intron	non_coding_transcript_variant	0	0	-	-	-	-	ADAR	0.306452	5	10	0.5	3	19	0.157895	11	33	0.333333	0	0	30	0	0	26	0	0	40	0	0.111111	1	9	0.111111	1	5	0.2	0	4	0
chr1	124635998	-	T	chr1:124635998	Gm28928	LINE	Intron	non_coding_transcript_variant	0	0	124635607	391	downstream	intronic	ADAR	0.245902	2	11	0.181818	4	20	0.2	9	30	0.3	0	0	28	0	0	27	0	0	35	0	0.0555556	0	9	0	1	5	0.2	0	4	0
chr1	124636014	-	T	chr1:124636014	Gm28928	LINE	Intron	non_coding_transcript_variant	0	0	124635591	423	downstream	intronic	ADARB1	0.152542	3	11	0.272727	0	17	0	6	31	0.193548	0	0	24	0	0	20	0	0	31	0	0	0	8	0	0	4	0	0	4	0
chr1	124636019	-	T	chr1:124636019	Gm28928	LINE	Intron	non_coding_transcript_variant	0	0	124635586	433	downstream	intronic	ADAR	0.634615	5	9	0.555556	7	14	0.5	21	29	0.724138	0	0	23	0	0	19	0	0	27	0	0.5	4	8	0.5	3	4	0.75	1	4	0.25
chr1	124636048	-	T	chr1:124636048	Gm28928	LINE	Intron	non_coding_transcript_variant	0	0	-	-	-	-	ADAR	0.489796	5	12	0.416667	4	7	0.571429	15	30	0.5	0	0	16	0	0	16	0	0	28	0	0.125	0	9	0	1	4	0.25	1	3	0.333333
chr1	124636057	-	T	chr1:124636057	Gm28928	LINE	Intron	non_coding_transcript_variant	1	1	-	-	-	-	ADAR	0.230769	1	11	0.0909091	0	6	0	8	22	0.363636	0	0	10	0	0	11	0	0	26	0	0.416667	3	7	0.428571	2	3	0.666667	0	2	0
chr1	124636357	-	T	chr1:124636357	Gm28928	SINE	Intron	non_coding_transcript_variant	0	0	-	-	-	-	ADARB1	0.0519481	1	26	0.0384615	2	18	0.111111	1	33	0.030303	0	0	30	0	0	26	0	0	30	0	0	0	23	0	0	10	0	0	10	0
chr1	124686082	-	T	chr1:124686082	Gm28928	LINE	Intron	non_coding_transcript_variant	0	0	-	-	-	-	ADAR	0.0653595	5	36	0.138889	1	45	0.0222222	4	72	0.0555556	0	0	45	0	0	40	0	0	31	0	0.029703	0	49	0	0	31	0	3	21	0.142857
chr1	124686370	-	T	chr1:124686370	Gm28928	LINE	Intron	non_coding_transcript_variant	0	0	-	-	-	-	ADARB1	0.0546875	2	47	0.0425532	3	32	0.09375	2	49	0.0408163	0	0	23	0	0	20	0	0	31	0	0	0	6	0	0	7	0	0	7	0
chr1	124686399	-	T	chr1:124686399	Gm28928	LINE	Intron	non_coding_transcript_variant	0	0	-	-	-	-	ADARB1	0.049505	2	33	0.0606061	1	27	0.037037	2	41	0.0487805	0	0	24	0	0	22	0	0	27	0	0	0	4	0	0	7	0	0	5	0
chr1	124686417	-	T	chr1:124686417	Gm28928	LINE	Intron	non_coding_transcript_variant	0	0	-	-	-	-	ADARB1	0.0681818	4	32	0.125	0	28	0	2	28	0.0714286	0	0	22	0	0	22	0	0	25	0	0	0	6	0	0	7	0	0	7	0
chr1	124694263	-	T	chr1:124694263	Gm28928	LINE	Intron	non_coding_transcript_variant	0	0	124693615	648	downstream	intronic	ADAR	0.267857	2	14	0.142857	6	17	0.352941	7	25	0.28	0	0	7	0	0	18	0	0	22	0	0.395349	5	13	0.384615	3	10	0.3	9	20	0.45
chr1	124710263	-	T	chr1:124710263	Gm28928	LTR	Intron	non_coding_transcript_variant	0	0	-	-	-	-	ADAR	0.030303	0	33	0	3	44	0.0681818	1	55	0.0181818	0	0	38	0	0	32	0	0	19	0	0.0289855	1	23	0.0434783	0	22	0	1	24	0.0416667
chr1	124723081	-	T	chr1:124723081	Gm28928	LINE	Intron	non_coding_transcript_variant	0	0	-	-	-	-	ADAR	0.0955882	4	54	0.0740741	4	33	0.121212	5	49	0.102041	0	0	21	0	0	29	0	0	13	0	0.142857	3	16	0.1875	1	11	0.0909091	1	8	0.125
chr1	124723140	-	T	chr1:124723140	Gm28928	LINE	Intron	non_coding_transcript_variant	0	0	-	-	-	-	ADARB1	0.0777778	2	26	0.0769231	3	21	0.142857	2	43	0.0465116	0	0	11	0	0	22	0	0	11	0	0	0	8	0	0	15	0	0	9	0
chr1	124723148	-	T	chr1:124723148	Gm28928	LINE	Intron	non_coding_transcript_variant	0	0	-	-	-	-	ADAR	0.0823529	2	22	0.0909091	4	23	0.173913	1	40	0.025	0	0	12	0	0	24	0	0	19	0	0.0571429	0	7	0	2	18	0.111111	0	10	0
chr1	124723150	-	T	chr1:124723150	Gm28928	LINE	Intron	non_coding_transcript_variant	0	0	-	-	-	-	ADAR	0.0581395	2	21	0.0952381	3	24	0.125	0	41	0	0	0	12	0	0	23	0	0	60	0	0.0555556	0	7	0	2	20	0.1	0	9	0
chr1	124729604	-	T	chr1:124729604	Gm28928	LINE	Intron	non_coding_transcript_variant	0	0	-	-	-	-	ADAR	0.10274	4	34	0.117647	4	47	0.0851064	7	65	0.107692	0	0	33	0	0	55	0	0	32	0	0.115385	3	19	0.157895	0	16	0	3	17	0.176471
chr1	124729631	-	T	chr1:124729631	Gm28928	LINE	Intron	non_coding_transcript_variant	0	0	-	-	-	-	ADAR	0.0555556	2	40	0.05	5	45	0.111111	1	59	0.0169492	0	0	29	0	0	51	0	0	30	0	0.0862069	2	26	0.0769231	1	13	0.0769231	2	19	0.105263
chr1	124729660	-	T	chr1:124729660	Gm28928	LINE	Intron	non_coding_transcript_variant	0	0	-	-	-	-	ADARB1	0.037594	1	34	0.0294118	2	44	0.0454545	2	55	0.0363636	0	0	28	0	0	51	0	0	26	0	0	0	23	0	0	11	0	0	19	0
chr1	124729706	-	T	chr1:124729706	Gm28928	LINE	Intron	non_coding_transcript_variant	0	0	-	-	-	-	ADAR	0.137097	0	27	0	5	38	0.131579	12	59	0.20339	0	0	28	0	0	47	0	0	20	0	0.218182	8	28	0.285714	3	10	0.3	1	17	0.0588235
chr1	124733305	-	T	chr1:124733305	Gm28928	LINE	Intron	non_coding_transcript_variant	0	0	-	-	-	-	ADARB1	0.0769231	0	20	0	2	14	0.142857	2	18	0.111111	0	0	23	0	0	10	0	0	39	0	0	0	22	0	0	8	0	0	10	0
chr1	124733344	-	T	chr1:124733344	Gm28928	LINE	Intron	non_coding_transcript_variant	0	0	-	-	-	-	ADARB1	0.0898876	2	27	0.0740741	2	28	0.0714286	4	34	0.117647	0	0	33	0	0	21	0	0	31	0	0	0	25	0	0	10	0	0	11	0
chr1	124733368	-	T	chr1:124733368	Gm28928	LINE	Intron	non_coding_transcript_variant	0	0	-	-	-	-	ADARB1	0.0705882	1	25	0.04	1	26	0.0384615	4	34	0.117647	0	0	28	0	0	25	0	0	27	0	0	0	25	0	0	7	0	0	12	0
chr1	124733423	-	T	chr1:124733423	Gm28928	LINE	Intron	non_coding_transcript_variant	0	0	-	-	-	-	ADAR	0.0630631	3	26	0.115385	0	33	0	4	52	0.0769231	0	0	33	0	0	39	0	0	30	0	0.097561	3	26	0.115385	0	7	0	1	8	0.125
chr1	124733426	-	T	chr1:124733426	Gm28928	LINE	Intron	non_coding_transcript_variant	0	0	-	-	-	-	ADAR	0.153846	2	23	0.0869565	3	32	0.09375	11	49	0.22449	0	0	30	0	0	38	0	0	28	0	0.0243902	1	25	0.04	0	8	0	0	8	0
chr1	124733434	-	T	chr1:124733434	Gm28928	LINE	Intron	non_coding_transcript_variant	0	0	-	-	-	-	ADAR	0.288462	10	29	0.344828	7	30	0.233333	13	45	0.288889	0	0	28	0	0	35	0	0	40	0	0.365854	8	25	0.32	4	8	0.5	3	8	0.375
chr1	124733436	-	T	chr1:124733436	Gm28928	LINE	Intron	non_coding_transcript_variant	0	0	-	-	-	-	ADAR	0.148515	4	29	0.137931	5	28	0.178571	6	44	0.136364	0	0	25	0	0	36	0	0	39	0	0.190476	3	26	0.115385	4	8	0.5	1	8	0.125
chr1	124733453	-	T	chr1:124733453	Gm28928	LINE	Intron	non_coding_transcript_variant	0	0	-	-	-	-	ADAR	0.0412371	3	25	0.12	0	29	0	1	43	0.0232558	0	0	23	0	0	33	0	0	38	0	0.0540541	2	21	0.0952381	0	6	0	0	10	0
chr1	124733517	-	T	chr1:124733517	Gm28928	LINE	Intron	non_coding_transcript_variant	0	0	-	-	-	-	ADARB1	0.0909091	0	12	0	2	14	0.142857	3	29	0.103448	0	0	14	0	0	17	0	0	34	0	0	0	13	0	0	6	0	0	4	0
chr1	124733521	-	T	chr1:124733521	Gm28928	LINE	Intron	non_coding_transcript_variant	0	0	-	-	-	-	ADAR	0.103448	1	14	0.0714286	0	15	0	5	29	0.172414	0	0	15	0	0	18	0	0	21	0	0.04	1	12	0.0833333	0	8	0	0	5	0
chr1	124737852	-	T	chr1:124737852	Gm28928	LINE	Intron	non_coding_transcript_variant	0	0	-	-	-	-	ADAR	0.339286	4	29	0.137931	12	20	0.6	3	7	0.428571	0	0	9	0	0	13	0	0	39	0	0.266667	1	5	0.2	2	4	0.5	1	6	0.166667
chr1	124737866	-	T	chr1:124737866	Gm28928	LINE	Intron	non_coding_transcript_variant	0	0	-	-	-	-	ADAR	0.253731	4	33	0.121212	8	23	0.347826	5	11	0.454545	0	0	16	0	0	18	0	0	38	0	0.222222	0	8	0	2	4	0.5	2	6	0.333333
chr1	124737870	-	T	chr1:124737870	Gm28928	LINE	Intron	non_coding_transcript_variant	0	0	-	-	-	-	ADAR	0.191781	4	36	0.111111	8	24	0.333333	2	13	0.153846	0	0	18	0	0	21	0	0	40	0	0.15	0	8	0	0	5	0	3	7	0.428571
chr1	124737879	-	T	chr1:124737879	Gm28928	LINE	Intron	non_coding_transcript_variant	0	0	-	-	-	-	ADAR	0.1125	4	36	0.111111	4	29	0.137931	1	15	0.0666667	0	0	18	0	0	24	0	0	41	0	0.0909091	0	9	0	1	6	0.166667	1	7	0.142857
chr1	124737903	-	T	chr1:124737903	Gm28928	LINE	Intron	non_coding_transcript_variant	0	0	-	-	-	-	ADAR	0.0357143	1	38	0.0263158	0	28	0	2	18	0.111111	0	0	19	0	0	28	0	0	41	0	0.0909091	1	9	0.111111	1	6	0.166667	0	7	0
chr1	124737912	-	T	chr1:124737912	Gm28928	LINE	Intron	non_coding_transcript_variant	0	0	-	-	-	-	ADARB1	0.0752688	2	40	0.05	2	32	0.0625	3	21	0.142857	0	0	20	0	0	25	0	0	39	0	0	0	9	0	0	6	0	0	7	0
chr1	124739438	-	T	chr1:124739438	Gm28928	SINE	Intron	non_coding_transcript_variant	0	0	-	-	-	-	ADARB1	0.0769231	2	22	0.0909091	1	9	0.111111	1	21	0.047619	0	0	15	0	0	22	0	0	35	0	0	0	27	0	0	10	0	0	11	0
chr1	124761790	-	T	chr1:124761790	Gm28928	LINE	Intron	non_coding_transcript_variant	0	0	124759724	2066	downstream	intronic	ADARB1	0.0472441	4	79	0.0506329	1	76	0.0131579	7	99	0.0707071	0	0	34	0	0	51	0	0	21	0	0	0	37	0	0	21	0	0	21	0
chr1	124762938	-	T	chr1:124762938	Gm28928	SINE	Intron	non_coding_transcript_variant	0	0	-	-	-	-	ADARB1	0.133005	7	56	0.125	3	62	0.0483871	17	85	0.2	0	0	42	0	0	38	0	0	21	0	0	0	34	0	0	27	0	0	29	0
chr1	124762941	-	T	chr1:124762941	Gm28928	SINE	Intron	non_coding_transcript_variant	0	0	-	-	-	-	ADARB1	0.25	11	57	0.192982	8	58	0.137931	31	85	0.364706	0	0	43	0	0	36	0	0	20	0	0	0	34	0	0	27	0	0	30	0
chr1	124762953	-	T	chr1:124762953	Gm28928	SINE	Intron	non_coding_transcript_variant	0	0	-	-	-	-	ADARB1	0.0508475	0	52	0	1	52	0.0192308	8	73	0.109589	0	0	34	0	0	34	0	0	23	0	0	0	33	0	0	27	0	0	24	0
chr1	124762971	-	T	chr1:124762971	Gm28928	SINE	Intron	non_coding_transcript_variant	0	0	124763728	757	upstream	intronic	ADARB1	0.0509554	5	47	0.106383	1	49	0.0204082	2	61	0.0327869	0	0	31	0	0	34	0	0	24	0	0	0	29	0	0	27	0	0	23	0
chr1	124762984	-	T	chr1:124762984	Gm28928	SINE	Intron	non_coding_transcript_variant	0	0	-	-	-	-	ADARB1	0.0413793	1	43	0.0232558	2	47	0.0425532	3	55	0.0545455	0	0	28	0	0	33	0	0	28	0	0	0	31	0	0	28	0	0	21	0
chr1	124762992	-	T	chr1:124762992	Gm28928	SINE	Intron	non_coding_transcript_variant	0	0	-	-	-	-	ADARB1	0.0902256	5	37	0.135135	2	44	0.0454545	5	52	0.0961538	0	0	29	0	0	33	0	0	30	0	0	0	29	0	0	27	0	0	19	0
chr1	124762997	-	T	chr1:124762997	Gm28928	SINE	Intron	non_coding_transcript_variant	0	0	-	-	-	-	ADAR	0.0610687	0	36	0	1	42	0.0238095	7	53	0.132075	0	0	28	0	0	34	0	0	33	0	0.0125	1	31	0.0322581	0	29	0	0	20	0
chr1	124766356	-	T	chr1:124766356	Gm28928	SINE	Intron	non_coding_transcript_variant	1	1	-	-	-	-	ADARB1	0.410256	16	43	0.372093	5	40	0.125	43	73	0.589041	0	0	30	0	0	26	0	0	28	0	0	0	35	0	0	26	0	0	20	0
chr1	124766362	-	T	chr1:124766362	Gm28928	SINE	Intron	non_coding_transcript_variant	0	0	-	-	-	-	ADARB1	0.10625	3	43	0.0697674	2	41	0.0487805	12	76	0.157895	0	0	30	0	0	26	0	0	56	0	0	0	33	0	0	27	0	0	20	0
chr1	124766367	-	T	chr1:124766367	Gm28928	SINE	Intron	non_coding_transcript_variant	0	0	-	-	-	-	ADARB1	0.0566038	4	45	0.0888889	0	39	0	5	75	0.0666667	0	0	30	0	0	26	0	0	60	0	0	0	34	0	0	28	0	0	22	0
chr1	124766374	-	T	chr1:124766374	Gm28928	SINE	Intron	non_coding_transcript_variant	0	0	-	-	-	-	ADARB1	0.05	3	44	0.0681818	0	41	0	5	75	0.0666667	0	0	30	0	0	22	0	0	60	0	0	0	33	0	0	29	0	0	23	0
chr1	124766376	-	T	chr1:124766376	Gm28928	SINE	Intron	non_coding_transcript_variant	0	0	-	-	-	-	ADARB1	0.0429448	2	44	0.0454545	0	42	0	5	77	0.0649351	0	0	28	0	0	22	0	0	54	0	0	0	34	0	0	31	0	0	23	0
chr1	124766383	-	T	chr1:124766383	Gm28928	SINE	Intron	non_coding_transcript_variant	0	0	-	-	-	-	ADAR	0.341935	15	39	0.384615	6	42	0.142857	32	74	0.432432	0	0	28	0	0	20	0	0	52	0	0.0229885	0	32	0	1	31	0.0322581	1	24	0.0416667
chr1	124768475	-	T	chr1:124768475	Gm28928	LINE	Intron	non_coding_transcript_variant	0	0	-	-	-	-	ADAR	0.0666667	2	18	0.111111	2	23	0.0869565	0	19	0	0	0	14	0	0	18	0	0	55	0	0.027027	0	12	0	0	16	0	1	9	0.111111
chr1	124768534	-	T	chr1:124768534	Gm28928	LINE	Intron	non_coding_transcript_variant	0	0	-	-	-	-	ADAR	0.0625	2	19	0.105263	2	36	0.0555556	1	25	0.04	0	0	30	0	0	26	0	0	54	0	0.0526316	2	22	0.0909091	0	21	0	1	14	0.0714286
chr1	124836259	-	T	chr1:124836259	Gm28928	SINE	Intron	non_coding_transcript_variant	0	0	-	-	-	-	ADAR	0.113772	7	58	0.12069	4	44	0.0909091	8	65	0.123077	0	0	39	0	0	51	0	0	55	0	0.060241	0	35	0	2	27	0.0740741	3	21	0.142857
chr1	124839164	-	T	chr1:124839164	Gm28928	SINE	Intron	non_coding_transcript_variant	0	0	-	-	-	-	ADAR	0.0372093	5	51	0.0980392	1	66	0.0151515	2	98	0.0204082	0	0	57	0	0	69	0	0	32	0	0.02	0	21	0	0	15	0	1	14	0.0714286
chr1	124842703	-	T	chr1:124842703	Gm28928	SINE	Intron	non_coding_transcript_variant	0	0	-	-	-	-	ADAR	0.0381679	1	71	0.0140845	2	73	0.0273973	7	118	0.059322	0	0	64	0	0	76	0	0	32	0	0.0190476	2	34	0.0588235	0	41	0	0	30	0
chr1	126657182	-	T	chr1:126657182	Nckap5	LINE	Intron	non_coding_transcript_variant	0	0	-	-	-	-	ADAR	0.297297	4	13	0.307692	1	7	0.142857	6	17	0.352941	0	0	3	0	0	8	0	0	34	0	0.222222	0	2	0	0	3	0	2	4	0.5
chr1	126657186	-	T	chr1:126657186	Nckap5	LINE	Intron	non_coding_transcript_variant	0	0	-	-	-	-	ADARB1	0.162162	1	13	0.0769231	1	7	0.142857	4	17	0.235294	0	0	3	0	0	9	0	0	37	0	0	0	2	0	0	4	0	0	4	0
chr1	127250442	+	A	chr1:127250442	Mgat5	LTR	Intron	non_coding_transcript_variant	0	0	-	-	-	-	ADARB1	0.0526316	1	18	0.0555556	1	20	0.05	1	19	0.0526316	0	0	11	0	0	33	0	0	38	0	0	0	31	0	0	30	0	0	20	0
chr1	127250621	+	A	chr1:127250621	Mgat5	LTR	Intron	non_coding_transcript_variant	0	0	-	-	-	-	ADARB1	0.0447761	1	24	0.0416667	0	18	0	2	25	0.08	0	0	17	0	0	14	0	0	38	0	0	0	32	0	0	13	0	0	10	0
chr1	127262686	+	A	chr1:127262686	Mgat5	SINE	Intron	regulatory_region_variant	0	0	127263177	491	downstream	intronic	ADARB1	0.0359712	4	49	0.0816327	0	45	0	1	45	0.0222222	0	0	59	0	0	40	0	0	18	0	0	0	16	0	0	16	0	0	13	0
chr1	127275786	+	A	chr1:127275786	Gm37510,Mgat5	.	Intron	non_coding_transcript_variant	0	0	127276062	276	downstream	intronic	ADARB1	0.0793651	1	18	0.0555556	1	15	0.0666667	3	30	0.1	0	0	21	0	0	15	0	0	24	0	0	0	18	0	0	11	0	0	9	0
chr1	127276070	+	A	chr1:127276070	Gm37510,Mgat5	.	Intron	non_coding_transcript_variant	0	0	127275778	292	upstream	intronic	ADAR	0.0491803	2	14	0.142857	1	15	0.0666667	0	32	0	0	0	24	0	0	27	0	0	52	0	0.0294118	1	12	0.0833333	0	12	0	0	10	0
chr1	127287703	+	A	chr1:127287703	Gm8451,Mgat5	SINE	Intron	non_coding_transcript_variant	0	0	127288974	1271	downstream	intronic	ADARB1	0.22	4	12	0.333333	3	16	0.1875	4	22	0.181818	0	0	9	0	0	18	0	0	76	0	0	0	11	0	0	14	0	0	6	0
chr1	127287708	+	A	chr1:127287708	Gm8451,Mgat5	SINE	Intron	non_coding_transcript_variant	0	0	127288970	1262	downstream	intronic	ADAR	0.24	4	12	0.333333	3	16	0.1875	5	22	0.227273	0	0	9	0	0	21	0	0	86	0	0.0333333	0	11	0	1	13	0.0769231	0	6	0
chr1	127287725	+	A	chr1:127287725	Gm8451,Mgat5	SINE	Intron	non_coding_transcript_variant	0	0	127288953	1228	downstream	intronic	ADAR	0.0983607	3	13	0.230769	3	21	0.142857	0	27	0	0	0	14	0	0	25	0	0	18	0	0.0263158	0	15	0	1	15	0.0666667	0	8	0
chr1	127288922	+	A	chr1:127288922	Mgat5	SINE	Intron	non_coding_transcript_variant	0	0	127287214	1708	upstream	intronic	ADARB1	0.234043	3	17	0.176471	2	10	0.2	6	20	0.3	0	0	11	0	0	11	0	0	20	0	0	0	4	0	0	4	0	0	7	0
chr1	127356236	+	A	chr1:127356236	Mgat5	SINE	Intron	non_coding_transcript_variant	0	0	127354877	1359	upstream	intronic	ADARB1	0.177215	5	29	0.172414	1	17	0.0588235	8	33	0.242424	0	0	23	0	0	37	0	0	21	0	0	0	15	0	0	15	0	0	2	0
chr1	127356844	+	A	chr1:127356844	Mgat5	SINE	Intron	non_coding_transcript_variant	0	0	127355589	1255	upstream	intronic	ADARB1	0.0689655	1	26	0.0384615	0	2	0	3	30	0.1	0	0	24	0	0	26	0	0	30	0	0	0	9	0	0	12	0	0	14	0
chr1	127356847	+	A	chr1:127356847	Mgat5	SINE	Intron	non_coding_transcript_variant	0	0	127355586	1261	upstream	intronic	ADARB1	0.103448	3	27	0.111111	0	2	0	3	29	0.103448	0	0	24	0	0	28	0	0	58	0	0	0	9	0	0	11	0	0	14	0
chr1	127394269	+	A	chr1:127394269	Mgat5	SINE	Intron	non_coding_transcript_variant	0	0	127393257	1012	upstream	intronic	ADAR	0.279412	8	20	0.4	7	25	0.28	4	23	0.173913	0	0	36	0	0	13	0	0	19	0	0.146341	3	16	0.1875	2	13	0.153846	1	12	0.0833333
chr1	127402577	+	A	chr1:127402577	Gm38301,Mgat5	SINE	Intron	intron_variant	0	0	127404721	2144	downstream	intronic	ADARB1	0.12	1	6	0.166667	1	8	0.125	1	11	0.0909091	0	0	4	0	0	11	0	0	25	0	0	0	7	0	0	12	0	0	5	0
chr1	127403019	+	A	chr1:127403019	Gm38301,Mgat5	SINE	Intron	intron_variant	0	0	-	-	-	-	ADARB1	0.108108	3	24	0.125	5	21	0.238095	0	29	0	0	0	16	0	0	15	0	0	17	0	0	0	10	0	0	4	0	0	12	0
chr1	127403030	+	A	chr1:127403030	Gm38301,Mgat5	SINE	Intron	intron_variant	0	0	127404908	1878	downstream	Intron	ADARB1	0.0759494	1	28	0.0357143	3	21	0.142857	2	30	0.0666667	0	0	19	0	0	20	0	0	17	0	0	0	14	0	0	7	0	0	14	0
chr1	127403031	+	A	chr1:127403031	Gm38301,Mgat5	SINE	Intron	intron_variant	0	0	-	-	-	-	ADARB1	0.0657895	1	28	0.0357143	4	21	0.190476	0	27	0	0	0	16	0	0	20	0	0	20	0	0	0	14	0	0	7	0	0	12	0
chr1	127403038	+	A	chr1:127403038	Gm38301,Mgat5	SINE	Intron	intron_variant	0	0	-	-	-	-	ADARB1	0.12987	3	31	0.0967742	6	21	0.285714	1	25	0.04	0	0	18	0	0	21	0	0	6	0	0	0	12	0	0	6	0	0	12	0
chr1	127411107	+	A	chr1:127411107	Gm38301,Mgat5	SINE	Intron	intron_variant	0	0	-	-	-	-	ADAR	0.0967742	1	26	0.0384615	3	20	0.15	2	16	0.125	0	0	7	0	0	23	0	0	34	0	0.0625	1	9	0.111111	0	2	0	0	5	0
chr1	127411108	+	A	chr1:127411108	Gm38301,Mgat5	SINE	Intron	intron_variant	0	0	-	-	-	-	ADARB1	0.111111	1	28	0.0357143	3	19	0.157895	3	16	0.1875	0	0	6	0	0	23	0	0	31	0	0	0	9	0	0	3	0	0	5	0
chr1	127472166	+	A	chr1:127472166	Mgat5	SINE	Intron	intron_variant	0	0	-	-	-	-	ADAR	0.05	3	32	0.09375	0	29	0	2	39	0.0512821	0	0	23	0	0	34	0	0	32	0	0.0408163	1	15	0.0666667	0	14	0	1	20	0.05
chr1	127536052	-	T	chr1:127536052	Tmem163	SINE	Intron	non_coding_transcript_variant	0	0	-	-	-	-	ADARB1	0.0485437	1	33	0.030303	2	33	0.0606061	2	37	0.0540541	0	0	16	0	0	19	0	0	57	0	0	0	34	0	0	19	0	0	23	0
chr1	127536091	-	T	chr1:127536091	Tmem163	SINE	Intron	non_coding_transcript_variant	0	0	-	-	-	-	ADARB1	0.0598291	2	33	0.0606061	5	40	0.125	0	44	0	0	0	25	0	0	20	0	0	18	0	0	0	34	0	0	26	0	0	25	0
chr1	127536134	-	T	chr1:127536134	Tmem163	SINE	Intron	non_coding_transcript_variant	0	0	127536732	598	upstream	intronic	ADARB1	0.214953	7	25	0.28	8	27	0.296296	8	55	0.145455	0	0	27	0	0	19	0	0	22	0	0	0	23	0	0	22	0	0	21	0
chr1	127536142	-	T	chr1:127536142	Tmem163	SINE	Intron	non_coding_transcript_variant	0	0	-	-	-	-	ADAR	0.32381	8	24	0.333333	11	28	0.392857	15	53	0.283019	0	0	28	0	0	20	0	0	23	0	0.0441176	3	25	0.12	0	21	0	0	22	0
chr1	127536797	-	T	chr1:127536797	Tmem163	SINE	Intron	non_coding_transcript_variant	0	0	-	-	-	-	ADAR	0.376623	10	30	0.333333	8	26	0.307692	11	21	0.52381	0	0	4	0	0	22	0	0	24	0	0.0465116	2	11	0.181818	0	21	0	0	11	0
chr1	127553642	-	T	chr1:127553642	Tmem163	SINE	Intron	NMD_transcript_variant	0	0	-	-	-	-	ADAR	0.0406977	5	47	0.106383	1	57	0.0175439	1	68	0.0147059	0	0	16	0	0	27	0	0	25	0	0.0481928	2	26	0.0769231	0	26	0	2	31	0.0645161
chr1	127554935	-	T	chr1:127554935	Tmem163	SINE	Intron	NMD_transcript_variant	0	0	-	-	-	-	ADARB1	0.0384615	1	24	0.0416667	2	47	0.0425532	1	33	0.030303	0	0	13	0	0	13	0	0	27	0	0	0	26	0	0	16	0	0	28	0
chr1	127554944	-	T	chr1:127554944	Tmem163	SINE	Intron	NMD_transcript_variant	0	0	-	-	-	-	ADARB1	0.0865385	0	23	0	7	46	0.152174	2	35	0.0571429	0	0	19	0	0	12	0	0	29	0	0	0	30	0	0	17	0	0	28	0
chr1	127566881	-	T	chr1:127566881	Tmem163	SINE	Intron	NMD_transcript_variant	0	0	-	-	-	-	ADAR	0.041958	1	39	0.025641	3	40	0.075	2	64	0.03125	0	0	15	0	0	26	0	0	43	0	0.0545455	1	21	0.047619	0	15	0	2	19	0.105263
chr1	127566917	-	T	chr1:127566917	Tmem163	SINE	Intron	NMD_transcript_variant	0	0	-	-	-	-	ADARB1	0.0413793	3	34	0.0882353	2	47	0.0425532	1	64	0.015625	0	0	16	0	0	29	0	0	61	0	0	0	26	0	0	18	0	0	18	0
chr1	127566951	-	T	chr1:127566951	Tmem163	SINE	Intron	NMD_transcript_variant	0	0	-	-	-	-	ADARB1	0.0425532	1	20	0.05	2	34	0.0588235	1	40	0.025	0	0	15	0	0	22	0	0	70	0	0	0	21	0	0	14	0	0	22	0
chr1	127566952	-	T	chr1:127566952	Tmem163	SINE	Intron	NMD_transcript_variant	0	0	-	-	-	-	ADAR	0.0531915	2	20	0.1	2	34	0.0588235	1	40	0.025	0	0	14	0	0	22	0	0	59	0	0.0181818	0	21	0	1	14	0.0714286	0	20	0
chr1	127579823	-	T	chr1:127579823	Tmem163	SINE	Intron	NMD_transcript_variant	0	0	-	-	-	-	ADARB1	0.0528455	5	101	0.049505	3	75	0.04	5	70	0.0714286	0	0	13	0	0	15	0	0	61	0	0	0	34	0	0	11	0	0	33	0
chr1	127579828	-	T	chr1:127579828	Tmem163	SINE	Intron	NMD_transcript_variant	0	0	-	-	-	-	ADARB1	0.0204082	2	99	0.020202	1	73	0.0136986	2	73	0.0273973	0	0	13	0	0	14	0	0	46	0	0	0	32	0	0	13	0	0	31	0
chr1	127579835	-	T	chr1:127579835	Tmem163	SINE	Intron	NMD_transcript_variant	0	0	-	-	-	-	ADARB1	0.0541667	5	92	0.0543478	2	73	0.0273973	6	75	0.08	0	0	14	0	0	14	0	0	31	0	0	0	32	0	0	14	0	0	26	0
chr1	127584342	-	T	chr1:127584342	Tmem163	SINE	Intron	NMD_transcript_variant	0	0	-	-	-	-	ADAR	0.0526316	0	27	0	2	40	0.05	4	47	0.0851064	0	0	10	0	0	11	0	0	29	0	0.0921053	3	22	0.136364	2	22	0.0909091	2	32	0.0625
chr1	127584351	-	T	chr1:127584351	Tmem163	SINE	Intron	NMD_transcript_variant	0	0	127582835	1516	downstream	intronic	ADAR	0.0265487	1	29	0.0344828	2	40	0.05	0	44	0	0	0	9	0	0	12	0	0	34	0	0.0123457	1	26	0.0384615	0	21	0	0	34	0
chr1	127590101	-	T	chr1:127590101	Tmem163	SINE	Intron	NMD_transcript_variant	0	0	-	-	-	-	ADAR	0.0446429	2	28	0.0714286	1	45	0.0222222	2	39	0.0512821	0	0	12	0	0	20	0	0	33	0	0.03125	1	36	0.0277778	2	31	0.0645161	0	29	0
chr1	127623688	-	T	chr1:127623688	Tmem163	LTR	Intron	NMD_transcript_variant	0	0	-	-	-	-	ADARB1	0.0483092	3	53	0.0566038	2	77	0.025974	5	77	0.0649351	0	0	40	0	0	20	0	0	33	0	0	0	38	0	0	36	0	0	38	0
chr1	127623869	-	T	chr1:127623869	Tmem163	LTR	Intron	NMD_transcript_variant	0	0	-	-	-	-	ADAR	0.0987124	8	73	0.109589	11	65	0.169231	4	95	0.0421053	0	0	30	0	0	33	0	0	19	0	0.025974	3	50	0.06	0	46	0	1	58	0.0172414
chr1	127623876	-	T	chr1:127623876	Tmem163	LTR	Intron	NMD_transcript_variant	0	0	-	-	-	-	ADARB1	0.083682	8	72	0.111111	7	66	0.106061	5	101	0.049505	0	0	30	0	0	33	0	0	19	0	0	0	47	0	0	45	0	0	54	0
chr1	127623879	-	T	chr1:127623879	Tmem163	LTR	Intron	NMD_transcript_variant	0	0	-	-	-	-	ADAR	0.0336134	3	71	0.0422535	2	65	0.0307692	3	102	0.0294118	0	0	29	0	0	33	0	0	34	0	0.0204082	2	49	0.0408163	0	45	0	1	53	0.0188679
chr1	127623987	-	T	chr1:127623987	Tmem163	LTR	Intron	NMD_transcript_variant	0	0	-	-	-	-	ADAR	0.0337079	3	79	0.0379747	4	75	0.0533333	2	113	0.0176991	0	0	28	0	0	36	0	0	34	0	0.0103627	0	74	0	0	64	0	2	55	0.0363636
chr1	127623993	-	T	chr1:127623993	Tmem163	LTR	Intron	NMD_transcript_variant	0	0	-	-	-	-	ADAR	0.0846774	7	65	0.107692	4	76	0.0526316	10	107	0.0934579	0	0	25	0	0	39	0	0	32	0	0.0795455	7	68	0.102941	4	59	0.0677966	3	49	0.0612245
chr1	127626062	-	T	chr1:127626062	Tmem163	SINE	Intron	regulatory_region_variant	0	0	127627130	1068	upstream	intronic	ADAR	0.0512821	4	62	0.0645161	6	97	0.0618557	4	114	0.0350877	0	0	23	0	0	31	0	0	26	0	0.0135135	1	51	0.0196078	0	55	0	1	42	0.0238095
chr1	127626069	-	T	chr1:127626069	Tmem163	SINE	Intron	regulatory_region_variant	0	0	-	-	-	-	ADARB1	0.179577	13	67	0.19403	17	98	0.173469	21	119	0.176471	0	0	29	0	0	33	0	0	27	0	0	0	53	0	0	56	0	0	45	0
chr1	127626070	-	T	chr1:127626070	Tmem163	SINE	Intron	regulatory_region_variant	0	0	-	-	-	-	ADARB1	0.0629371	4	67	0.0597015	10	97	0.103093	4	122	0.0327869	0	0	28	0	0	34	0	0	34	0	0	0	53	0	0	56	0	0	43	0
chr1	127626075	-	T	chr1:127626075	Tmem163	SINE	Intron	regulatory_region_variant	0	0	127627117	1042	upstream	intronic	ADARB1	0.0553633	5	65	0.0769231	8	98	0.0816327	3	126	0.0238095	0	0	28	0	0	37	0	0	73	0	0	0	58	0	0	56	0	0	48	0
chr1	127626076	-	T	chr1:127626076	Tmem163	SINE	Intron	regulatory_region_variant	0	0	127627117	1041	upstream	intronic	ADARB1	0.0511945	6	68	0.0882353	3	102	0.0294118	6	123	0.0487805	0	0	27	0	0	36	0	0	76	0	0	0	59	0	0	55	0	0	49	0
chr1	127626127	-	T	chr1:127626127	Tmem163	SINE	Intron	regulatory_region_variant	0	0	-	-	-	-	ADAR	0.0921348	10	131	0.0763359	14	157	0.089172	17	157	0.10828	0	0	28	0	0	52	0	0	78	0	0.00505051	0	68	0	1	75	0.0133333	0	55	0
chr1	127626568	-	T	chr1:127626568	Tmem163	LTR	Intron	regulatory_region_variant	0	0	127627955	1387	upstream	intronic	ADARB1	0.0299625	7	92	0.076087	0	86	0	1	89	0.011236	0	0	30	0	0	31	0	0	79	0	0	0	50	0	0	40	0	0	70	0
chr1	127626618	-	T	chr1:127626618	Tmem163	LTR	Intron	regulatory_region_variant	0	0	127627905	1287	upstream	intronic	ADAR	0.198157	18	74	0.243243	13	70	0.185714	12	73	0.164384	0	0	23	0	0	20	0	0	94	0	0.0779221	5	54	0.0925926	1	34	0.0294118	6	66	0.0909091
chr1	127626625	-	T	chr1:127626625	Tmem163	LTR	Intron	regulatory_region_variant	0	0	127627895	1270	upstream	intronic	ADAR	0.0273973	1	78	0.0128205	5	68	0.0735294	0	73	0	0	0	21	0	0	19	0	0	95	0	0.00621118	0	54	0	0	36	0	1	71	0.0140845
chr1	127626629	-	T	chr1:127626629	Tmem163	LTR	Intron	regulatory_region_variant	0	0	127627893	1264	upstream	intronic	ADAR	0.0861244	7	78	0.0897436	8	65	0.123077	3	66	0.0454545	0	0	21	0	0	20	0	0	71	0	0.0903226	6	53	0.113208	5	36	0.138889	3	66	0.0454545
chr1	127626630	-	T	chr1:127626630	Tmem163	LTR	Intron	regulatory_region_variant	0	0	127627892	1262	upstream	intronic	ADARB1	0.0331754	4	76	0.0526316	2	65	0.0307692	1	70	0.0142857	0	0	21	0	0	20	0	0	80	0	0	0	53	0	0	36	0	0	68	0
chr1	127626634	-	T	chr1:127626634	Tmem163	LTR	Intron	regulatory_region_variant	0	0	-	-	-	-	ADARB1	0.0343137	1	75	0.0133333	5	62	0.0806452	1	67	0.0149254	0	0	17	0	0	20	0	0	80	0	0	0	54	0	0	31	0	0	68	0
chr1	127626635	-	T	chr1:127626635	Tmem163	LTR	Intron	regulatory_region_variant	0	0	127625384	1251	downstream	Intron	ADAR	0.210784	19	76	0.25	15	62	0.241935	9	66	0.136364	0	0	17	0	0	21	0	0	81	0	0.142857	9	53	0.169811	5	34	0.147059	8	67	0.119403
chr1	127626678	-	T	chr1:127626678	Tmem163	LTR	Intron	regulatory_region_variant	0	0	127627831	1153	upstream	intronic	ADAR	0.0929368	12	106	0.113208	10	77	0.12987	3	86	0.0348837	0	0	15	0	0	23	0	0	81	0	0.00746269	0	52	0	1	30	0.0333333	0	52	0
chr1	127626681	-	T	chr1:127626681	Tmem163	LTR	Intron	regulatory_region_variant	0	0	127627828	1147	upstream	intronic	ADAR	0.161871	19	108	0.175926	13	78	0.166667	13	92	0.141304	0	0	16	0	0	23	0	0	105	0	0.00757576	0	53	0	1	30	0.0333333	0	49	0
chr1	127626739	-	T	chr1:127626739	Tmem163	LTR	Intron	regulatory_region_variant	0	0	127627761	1022	upstream	intronic	ADARB1	0.0242588	2	125	0.016	2	114	0.0175439	5	132	0.0378788	0	0	25	0	0	37	0	0	72	0	0	0	45	0	0	27	0	0	40	0
chr1	127626742	-	T	chr1:127626742	Tmem163	LTR	Intron	regulatory_region_variant	0	0	127627756	1014	upstream	intronic	ADARB1	0.015873	1	127	0.00787402	3	117	0.025641	2	134	0.0149254	0	0	25	0	0	37	0	0	51	0	0	0	43	0	0	26	0	0	40	0
chr1	127626761	-	T	chr1:127626761	Tmem163	LTR	Intron	regulatory_region_variant	0	0	127625780	981	downstream	Intron	ADAR	0.0351288	7	132	0.0530303	2	140	0.0142857	6	155	0.0387097	0	0	29	0	0	39	0	0	51	0	0.0155039	1	47	0.0212766	1	35	0.0285714	0	47	0
chr1	127626793	-	T	chr1:127626793	Tmem163	LTR	Intron	regulatory_region_variant	0	0	127627717	924	upstream	intronic	ADARB1	0.0362319	4	100	0.04	8	150	0.0533333	3	164	0.0182927	0	0	28	0	0	43	0	0	48	0	0	0	50	0	0	25	0	0	45	0
chr1	127626798	-	T	chr1:127626798	Tmem163	LTR	Intron	regulatory_region_variant	0	0	127627708	910	upstream	intronic	ADARB1	0.0293399	3	101	0.029703	4	147	0.0272109	5	161	0.0310559	0	0	27	0	0	40	0	0	46	0	0	0	53	0	0	31	0	0	44	0
chr1	127626807	-	T	chr1:127626807	Tmem163	LTR	Intron	regulatory_region_variant	0	0	127627697	890	upstream	intronic	ADARB1	0.390977	31	99	0.313131	69	142	0.485915	56	158	0.35443	0	0	26	0	0	37	0	0	43	0	0	0	62	0	0	35	0	0	47	0
chr1	127626808	-	T	chr1:127626808	Tmem163	LTR	Intron	regulatory_region_variant	0	0	127627697	889	upstream	intronic	ADAR	0.0833333	9	103	0.0873786	12	146	0.0821918	13	159	0.081761	0	0	26	0	0	38	0	0	44	0	0.0985915	5	61	0.0819672	5	33	0.151515	4	48	0.0833333
chr1	127626835	-	T	chr1:127626835	Tmem163	LTR	Intron	regulatory_region_variant	0	0	127627671	836	upstream	intronic	ADAR	0.0517241	6	116	0.0517241	5	140	0.0357143	10	150	0.0666667	0	0	24	0	0	25	0	0	51	0	0.0123457	0	64	0	2	42	0.047619	0	56	0
chr1	127626843	-	T	chr1:127626843	Tmem163	LTR	Intron	regulatory_region_variant	0	0	127627663	820	upstream	intronic	ADAR	0.0719603	7	115	0.0608696	8	137	0.0583942	14	151	0.0927152	0	0	24	0	0	21	0	0	56	0	0.0122699	0	63	0	1	44	0.0227273	1	56	0.0178571
chr1	127626850	-	T	chr1:127626850	Tmem163	LTR	Intron	regulatory_region_variant	0	0	127627656	806	upstream	intronic	ADARB1	0.137306	8	103	0.0776699	13	128	0.101562	32	155	0.206452	0	0	26	0	0	22	0	0	73	0	0	0	62	0	0	43	0	0	54	0
chr1	127626851	-	T	chr1:127626851	Tmem163	LTR	Intron	regulatory_region_variant	0	0	127627655	804	upstream	intronic	ADARB1	0.0178117	1	104	0.00961538	0	131	0	6	158	0.0379747	0	0	24	0	0	22	0	0	73	0	0	0	62	0	0	42	0	0	56	0
chr1	127626867	-	T	chr1:127626867	Tmem163	LTR	Intron	regulatory_region_variant	0	0	127627638	771	upstream	intronic	ADARB1	0.0781991	8	118	0.0677966	16	137	0.116788	9	167	0.0538922	0	0	24	0	0	24	0	0	90	0	0	0	66	0	0	51	0	0	59	0
chr1	127627123	-	T	chr1:127627123	Tmem163	SINE	Intron	regulatory_region_variant	0	0	-	-	-	-	ADARB1	0.0346021	4	102	0.0392157	2	86	0.0232558	4	101	0.039604	0	0	21	0	0	40	0	0	102	0	0	0	60	0	0	56	0	0	46	0
chr1	127627128	-	T	chr1:127627128	Tmem163	SINE	Intron	regulatory_region_variant	0	0	-	-	-	-	ADARB1	0.0416667	5	99	0.0505051	3	85	0.0352941	4	104	0.0384615	0	0	20	0	0	37	0	0	97	0	0	0	58	0	0	52	0	0	42	0
chr1	127627140	-	T	chr1:127627140	Tmem163	SINE	Intron	regulatory_region_variant	0	0	-	-	-	-	ADAR	0.0652174	11	104	0.105769	3	77	0.038961	4	95	0.0421053	0	0	20	0	0	35	0	0	94	0	0.01875	3	63	0.047619	0	53	0	0	44	0
chr1	127627673	-	T	chr1:127627673	Tmem163	LTR	Intron	regulatory_region_variant	0	0	-	-	-	-	ADAR	0.0269461	1	102	0.00980392	5	110	0.0454545	3	122	0.0245902	0	0	24	0	0	41	0	0	93	0	0.0143885	0	56	0	2	43	0.0465116	0	40	0
chr1	127627674	-	T	chr1:127627674	Tmem163	LTR	Intron	regulatory_region_variant	0	0	-	-	-	-	ADAR	0.0391566	2	99	0.020202	6	111	0.0540541	5	122	0.0409836	0	0	24	0	0	40	0	0	89	0	0.00729927	1	56	0.0178571	0	41	0	0	40	0
chr1	127627679	-	T	chr1:127627679	Tmem163	LTR	Intron	regulatory_region_variant	0	0	-	-	-	-	ADAR	0.0828025	5	94	0.0531915	12	106	0.113208	9	114	0.0789474	0	0	22	0	0	41	0	0	92	0	0.00813008	0	52	0	0	40	0	1	31	0.0322581
chr1	127627688	-	T	chr1:127627688	Tmem163	LTR	Intron	regulatory_region_variant	0	0	-	-	-	-	ADAR	0.0870968	8	93	0.0860215	6	94	0.0638298	13	123	0.105691	0	0	21	0	0	37	0	0	101	0	0.0176991	1	46	0.0217391	0	36	0	1	31	0.0322581
chr1	127627693	-	T	chr1:127627693	Tmem163	LTR	Intron	regulatory_region_variant	0	0	-	-	-	-	ADARB1	0.027027	1	87	0.0114943	2	90	0.0222222	5	119	0.0420168	0	0	22	0	0	33	0	0	104	0	0	0	46	0	0	39	0	0	33	0
chr1	127627701	-	T	chr1:127627701	Tmem163	LTR	Intron	regulatory_region_variant	0	0	127626804	897	downstream	intronic	ADAR	0.0573477	5	83	0.060241	3	85	0.0352941	8	111	0.0720721	0	0	22	0	0	36	0	0	103	0	0.109091	7	43	0.162791	2	35	0.0571429	3	32	0.09375
chr1	127627717	-	T	chr1:127627717	Tmem163	LTR	Intron	regulatory_region_variant	0	0	127626790	927	downstream	intronic	ADARB1	0.048951	2	63	0.031746	6	96	0.0625	6	127	0.0472441	0	0	20	0	0	40	0	0	50	0	0	0	38	0	0	31	0	0	31	0
chr1	127627723	-	T	chr1:127627723	Tmem163	LTR	Intron	regulatory_region_variant	0	0	127626784	939	downstream	intronic	ADAR	0.0509091	2	59	0.0338983	6	97	0.0618557	6	119	0.0504202	0	0	20	0	0	43	0	0	49	0	0.02	2	38	0.0526316	0	29	0	0	33	0
chr1	127627771	-	T	chr1:127627771	Tmem163	LTR	Intron	regulatory_region_variant	0	0	127626729	1042	downstream	intronic	ADARB1	0.0442478	2	61	0.0327869	6	75	0.08	2	90	0.0222222	0	0	18	0	0	33	0	0	47	0	0	0	48	0	0	33	0	0	37	0
chr1	127627776	-	T	chr1:127627776	Tmem163	LTR	Intron	regulatory_region_variant	0	0	-	-	-	-	ADARB1	0.0313901	1	56	0.0178571	3	77	0.038961	3	90	0.0333333	0	0	19	0	0	32	0	0	81	0	0	0	45	0	0	30	0	0	37	0
chr1	127627814	-	T	chr1:127627814	Tmem163	LTR	Intron	NMD_transcript_variant	0	0	-	-	-	-	ADAR	0.0704846	6	54	0.111111	7	78	0.0897436	3	95	0.0315789	0	0	14	0	0	27	0	0	85	0	0.0446429	3	50	0.06	0	28	0	2	34	0.0588235
chr1	127627830	-	T	chr1:127627830	Tmem163	LTR	Intron	NMD_transcript_variant	0	0	127626679	1151	downstream	intronic	ADAR	0.464286	32	63	0.507937	41	81	0.506173	44	108	0.407407	0	0	15	0	0	31	0	0	80	0	0.00806452	0	56	0	1	31	0.0322581	0	37	0
chr1	127627899	-	T	chr1:127627899	Tmem163	LTR	Intron	NMD_transcript_variant	0	0	127626621	1278	downstream	intronic	ADARB1	0.0272374	1	70	0.0142857	1	83	0.0120482	5	104	0.0480769	0	0	17	0	0	31	0	0	74	0	0	0	56	0	0	33	0	0	41	0
chr1	127627903	-	T	chr1:127627903	Tmem163	LTR	Intron	NMD_transcript_variant	0	0	127626614	1289	downstream	intronic	ADAR	0.244898	16	67	0.238806	26	76	0.342105	18	102	0.176471	0	0	15	0	0	32	0	0	75	0	0.00769231	0	52	0	0	35	0	1	43	0.0232558
chr1	127627904	-	T	chr1:127627904	Tmem163	LTR	Intron	NMD_transcript_variant	0	0	127626614	1290	downstream	intronic	ADAR	0.16	10	69	0.144928	17	79	0.21519	13	102	0.127451	0	0	15	0	0	32	0	0	72	0	0.0232558	1	54	0.0185185	1	35	0.0285714	1	40	0.025
chr1	127627919	-	T	chr1:127627919	Tmem163	LTR	Intron	NMD_transcript_variant	0	0	127626601	1318	downstream	intronic	ADARB1	0.0294118	1	75	0.0133333	2	76	0.0263158	4	87	0.045977	0	0	14	0	0	28	0	0	77	0	0	0	58	0	0	38	0	0	45	0
chr1	127627927	-	T	chr1:127627927	Tmem163	LTR	Intron	NMD_transcript_variant	0	0	-	-	-	-	ADARB1	0.0373444	3	70	0.0428571	4	79	0.0506329	2	92	0.0217391	0	0	20	0	0	31	0	0	78	0	0	0	62	0	0	39	0	0	39	0
chr1	127631885	-	T	chr1:127631885	Tmem163	SINE	Intron	NMD_transcript_variant	0	0	-	-	-	-	ADARB1	0.149798	11	97	0.113402	10	60	0.166667	16	90	0.177778	0	0	16	0	0	19	0	0	61	0	0	0	87	0	0	66	0	0	58	0
chr1	127632567	-	T	chr1:127632567	Tmem163	SINE	Intron	NMD_transcript_variant	0	0	-	-	-	-	ADAR	0.0217391	2	84	0.0238095	3	114	0.0263158	2	124	0.016129	0	0	36	0	0	32	0	0	56	0	0.00574713	0	67	0	1	51	0.0196078	0	56	0
chr1	127632635	-	T	chr1:127632635	Tmem163	SINE	Intron	NMD_transcript_variant	0	0	-	-	-	-	ADARB1	0.0333333	3	86	0.0348837	7	138	0.0507246	1	106	0.00943396	0	0	26	0	0	31	0	0	55	0	0	0	62	0	0	54	0	0	59	0
chr1	127632705	-	T	chr1:127632705	Tmem163	SINE	Intron	NMD_transcript_variant	0	0	-	-	-	-	ADAR	0.0340557	6	72	0.0833333	4	121	0.0330579	1	130	0.00769231	0	0	29	0	0	46	0	0	51	0	0.0157895	1	67	0.0149254	1	56	0.0178571	1	67	0.0149254
chr1	127633547	-	T	chr1:127633547	Tmem163	.	Intron	NMD_transcript_variant	0	0	-	-	-	-	ADARB1	0.0373563	1	82	0.0121951	1	112	0.00892857	11	154	0.0714286	0	0	21	0	0	44	0	0	56	0	0	0	84	0	0	66	0	0	62	0
chr1	127634567	-	T	chr1:127634567	Tmem163	LTR	Intron	NMD_transcript_variant	0	0	127633560	1007	downstream	intronic	ADARB1	0.0412371	2	93	0.0215054	5	100	0.05	5	98	0.0510204	0	0	33	0	0	46	0	0	58	0	0	0	96	0	0	87	0	0	79	0
chr1	127634572	-	T	chr1:127634572	Tmem163	LTR	Intron	NMD_transcript_variant	0	0	127633554	1018	downstream	intronic	ADARB1	0.0294118	2	86	0.0232558	1	96	0.0104167	5	90	0.0555556	0	0	30	0	0	39	0	0	58	0	0	0	90	0	0	78	0	0	77	0
chr1	127634574	-	T	chr1:127634574	Tmem163	LTR	Intron	NMD_transcript_variant	0	0	127633553	1021	downstream	intronic	ADAR	0.272059	29	85	0.341176	23	95	0.242105	22	92	0.23913	0	0	30	0	0	37	0	0	57	0	0.00809717	2	90	0.0222222	0	78	0	0	79	0
chr1	127634579	-	T	chr1:127634579	Tmem163	LTR	Intron	NMD_transcript_variant	0	0	127633548	1031	downstream	intronic	ADARB1	0.0992647	7	85	0.0823529	10	95	0.105263	10	92	0.108696	0	0	29	0	0	37	0	0	55	0	0	0	89	0	0	79	0	0	78	0
chr1	127634582	-	T	chr1:127634582	Tmem163	LTR	Intron	NMD_transcript_variant	0	0	127633546	1036	downstream	intronic	ADARB1	0.212121	14	83	0.168675	21	93	0.225806	21	88	0.238636	0	0	29	0	0	35	0	0	44	0	0	0	92	0	0	80	0	0	79	0
chr1	127634592	-	T	chr1:127634592	Tmem163	LTR	Intron	NMD_transcript_variant	0	0	127635646	1054	upstream	Intron	ADARB1	0.064	2	82	0.0243902	4	78	0.0512821	10	90	0.111111	0	0	22	0	0	29	0	0	77	0	0	0	70	0	0	69	0	0	76	0
chr1	127641701	-	T	chr1:127641701	Tmem163	Unknown	Intron	NMD_transcript_variant	0	0	-	-	-	-	ADAR	0.0638298	5	64	0.078125	4	41	0.097561	0	36	0	0	0	12	0	0	11	0	0	80	0	0.027027	4	62	0.0645161	1	72	0.0138889	0	51	0
chr1	127665074	-	T	chr1:127665074	Tmem163	SINE	Intron	NMD_transcript_variant	0	0	-	-	-	-	ADARB1	0.012931	2	78	0.025641	1	64	0.015625	0	90	0	0	0	18	0	0	33	0	0	88	0	0	0	61	0	0	64	0	0	54	0
chr1	127665177	-	T	chr1:127665177	Tmem163	SINE	Intron	NMD_transcript_variant	0	0	-	-	-	-	ADARB1	0.0284091	4	128	0.03125	4	95	0.0421053	2	129	0.0155039	0	0	20	0	0	33	0	0	104	0	0	0	93	0	0	59	0	0	71	0
chr1	127767154	-	T	chr1:127767154	2900009J06Rik,Acmsd	SINE	UTR	3_prime_UTR_variant	0	0	127768400	1246	upstream	intronic	ADARB1	0.423077	4	9	0.444444	5	8	0.625	2	9	0.222222	0	0	6	0	0	10	0	0	74	0	0	0	6	0	0	1	0	0	4	0
chr1	127768396	-	T	chr1:127768396	2900009J06Rik,Acmsd	SINE	Intron	non_coding_transcript_variant	0	0	127767157	1239	downstream	UTR	ADARB1	0.291667	1	11	0.0909091	3	6	0.5	3	7	0.428571	0	0	2	0	0	2	0	0	69	0	0	0	4	0	0	2	0	0	4	0
chr1	127768406	-	T	chr1:127768406	2900009J06Rik,Acmsd	SINE	Intron	non_coding_transcript_variant	0	0	127767147	1259	downstream	UTR	ADARB1	0.192308	1	13	0.0769231	2	6	0.333333	2	7	0.285714	0	0	3	0	0	1	0	0	70	0	0	0	3	0	0	2	0	0	3	0
chr1	127778701	+	A	chr1:127778701	2900009J06Rik,Ccnt2	SINE	Intron	regulatory_region_variant	0	0	127777746	955	upstream	intronic	ADARB1	0.0689655	1	50	0.02	6	45	0.133333	3	50	0.06	0	0	155	0	0	120	0	0	70	0	0	0	26	0	0	19	0	0	19	0
chr1	127794072	+	A	chr1:127794072	Ccnt2	SINE	Intron	non_coding_transcript_exon_variant	0	0	-	-	-	-	ADAR	0.120968	1	28	0.0357143	6	45	0.133333	8	51	0.156863	0	0	97	0	0	54	0	0	71	0	0.00909091	0	28	0	1	45	0.0222222	0	37	0
chr1	127794074	+	A	chr1:127794074	Ccnt2	SINE	Intron	non_coding_transcript_exon_variant	0	0	-	-	-	-	ADARB1	0.0806452	1	29	0.0344828	5	44	0.113636	4	51	0.0784314	0	0	97	0	0	55	0	0	68	0	0	0	28	0	0	44	0	0	39	0
chr1	127794092	+	A	chr1:127794092	Ccnt2	SINE	Intron	non_coding_transcript_exon_variant	0	0	-	-	-	-	ADARB1	0.0564516	1	27	0.037037	5	47	0.106383	1	50	0.02	0	0	94	0	0	67	0	0	22	0	0	0	22	0	0	46	0	0	41	0
chr1	127901903	+	A	chr1:127901903	Rab3gap1	SINE	Intron	non_coding_transcript_variant	0	0	-	-	-	-	ADAR	0.0869565	2	27	0.0740741	2	11	0.181818	0	8	0	0	0	21	0	0	24	0	0	31	0	0.0526316	1	8	0.125	0	9	0	0	2	0
chr1	127906928	+	A	chr1:127906928	Rab3gap1	SINE	Intron	intron_variant	0	0	127906670	258	upstream	intronic	ADARB1	0.157895	0	3	0	1	8	0.125	2	8	0.25	0	0	12	0	0	10	0	0	44	0	0	0	4	0	0	1	0	0	7	0
chr1	127909626	+	A	chr1:127909626	Rab3gap1	SINE	Intron	intron_variant	0	0	127908648	978	upstream	intronic	ADAR	0.142857	2	10	0.2	2	11	0.181818	1	14	0.0714286	0	0	40	0	0	21	0	0	2	0	0.0322581	1	17	0.0588235	0	2	0	0	12	0
chr1	127913672	+	A	chr1:127913672	Rab3gap1	SINE	Intron	intron_variant	0	0	127915168	1496	downstream	intronic	ADAR	0.0746269	4	36	0.111111	0	12	0	1	19	0.0526316	0	0	23	0	0	22	0	0	2	0	0.0333333	2	22	0.0909091	0	14	0	0	24	0
chr1	127913718	+	A	chr1:127913718	Rab3gap1	SINE	Intron	intron_variant	0	0	127914365	647	downstream	intronic	ADARB1	0.16	2	25	0.08	1	10	0.1	5	15	0.333333	0	0	22	0	0	23	0	0	1	0	0	0	17	0	0	11	0	0	16	0
chr1	127913735	+	A	chr1:127913735	Rab3gap1	SINE	Intron	intron_variant	0	0	127914348	613	downstream	intronic	ADARB1	0.18	4	24	0.166667	3	10	0.3	2	16	0.125	0	0	24	0	0	20	0	0	68	0	0	0	19	0	0	12	0	0	14	0
chr1	127913739	+	A	chr1:127913739	Rab3gap1	SINE	Intron	intron_variant	0	0	127914344	605	downstream	intronic	ADARB1	0.122449	2	24	0.0833333	1	11	0.0909091	3	14	0.214286	0	0	26	0	0	20	0	0	46	0	0	0	20	0	0	15	0	0	14	0
chr1	127914334	+	A	chr1:127914334	Rab3gap1	SINE	Intron	intron_variant	0	0	127913749	585	upstream	intronic	ADAR	0.174419	3	20	0.15	4	24	0.166667	8	42	0.190476	0	0	46	0	0	55	0	0	45	0	0.037037	1	9	0.111111	0	10	0	0	8	0
chr1	127914338	+	A	chr1:127914338	Rab3gap1	SINE	Intron	intron_variant	0	0	127913745	593	upstream	intronic	ADARB1	0.0736842	0	20	0	1	27	0.037037	6	48	0.125	0	0	46	0	0	55	0	0	48	0	0	0	9	0	0	10	0	0	8	0
chr1	127914339	+	A	chr1:127914339	Rab3gap1	SINE	Intron	intron_variant	0	0	127913744	595	upstream	intronic	ADAR	0.326316	9	20	0.45	7	26	0.269231	15	49	0.306122	0	0	47	0	0	55	0	0	20	0	0.037037	1	9	0.111111	0	10	0	0	8	0
chr1	127921197	+	A	chr1:127921197	Rab3gap1	SINE	Intron	intron_variant	0	0	127922084	887	downstream	intronic	ADAR	0.142857	8	50	0.16	6	42	0.142857	5	41	0.121951	0	0	93	0	0	78	0	0	7	0	0.0483871	2	25	0.08	1	20	0.05	0	17	0
chr1	127921271	+	A	chr1:127921271	Rab3gap1	SINE	Intron	intron_variant	0	0	127922024	753	downstream	intronic	ADAR	0.242857	14	57	0.245614	9	41	0.219512	11	42	0.261905	0	0	120	0	0	85	0	0	20	0	0.0140845	1	29	0.0344828	0	26	0	0	16	0
chr1	127921281	+	A	chr1:127921281	Rab3gap1	SINE	Intron	intron_variant	0	0	127922014	733	downstream	intronic	ADAR	0.244094	15	52	0.288462	4	38	0.105263	12	37	0.324324	0	0	112	0	0	86	0	0	29	0	0.0289855	2	29	0.0689655	0	24	0	0	16	0
chr1	127922008	+	A	chr1:127922008	Rab3gap1	SINE	Intron	intron_variant	0	0	127921287	721	upstream	intronic	ADARB1	0.233333	3	16	0.1875	1	4	0.25	3	10	0.3	0	0	31	0	0	16	0	0	23	0	0	0	19	0	0	10	0	0	11	0
chr1	127922009	+	A	chr1:127922009	Rab3gap1	SINE	Intron	intron_variant	0	0	127921286	723	upstream	intronic	ADAR	0.354839	5	16	0.3125	3	5	0.6	3	10	0.3	0	0	30	0	0	16	0	0	20	0	0.0243902	0	19	0	1	10	0.1	0	12	0
chr1	127922010	+	A	chr1:127922010	Rab3gap1	SINE	Intron	intron_variant	0	0	127921285	725	upstream	intronic	ADAR	0.354839	5	16	0.3125	3	5	0.6	3	10	0.3	0	0	30	0	0	18	0	0	19	0	0.0232558	0	19	0	1	11	0.0909091	0	13	0
chr1	127922015	+	A	chr1:127922015	Rab3gap1	SINE	Intron	intron_variant	0	0	127921280	735	upstream	intronic	ADAR	0.4375	6	15	0.4	2	6	0.333333	6	11	0.545455	0	0	33	0	0	18	0	0	40	0	0.0645161	2	16	0.125	0	7	0	0	8	0
chr1	127922018	+	A	chr1:127922018	Rab3gap1	SINE	Intron	intron_variant	0	0	127921277	741	upstream	intronic	ADAR	0.410256	6	19	0.315789	7	9	0.777778	3	11	0.272727	0	0	35	0	0	21	0	0	42	0	0.0909091	1	16	0.0625	1	7	0.142857	1	10	0.1
chr1	127922030	+	A	chr1:127922030	Rab3gap1	SINE	Intron	intron_variant	0	0	127921264	766	upstream	intronic	ADARB1	0.4375	10	22	0.454545	7	12	0.583333	4	14	0.285714	0	0	47	0	0	26	0	0	42	0	0	0	11	0	0	7	0	0	11	0
chr1	127929404	+	A	chr1:127929404	Rab3gap1	SINE	Intron	intron_variant	0	0	-	-	-	-	ADARB1	0.217391	4	25	0.16	6	22	0.272727	5	22	0.227273	0	0	43	0	0	25	0	0	57	0	0	0	27	0	0	26	0	0	11	0
chr1	127929414	+	A	chr1:127929414	Rab3gap1	SINE	Intron	intron_variant	0	0	-	-	-	-	ADARB1	0.12987	4	25	0.16	4	27	0.148148	2	25	0.08	0	0	47	0	0	28	0	0	74	0	0	0	24	0	0	25	0	0	11	0
chr1	127929426	+	A	chr1:127929426	Rab3gap1	SINE	Intron	intron_variant	0	0	127930187	761	downstream	intronic	ADARB1	0.102564	5	25	0.2	1	25	0.04	2	28	0.0714286	0	0	47	0	0	30	0	0	68	0	0	0	24	0	0	23	0	0	14	0
chr1	127931473	+	A	chr1:127931473	Rab3gap1	SINE	Intron	intron_variant	0	0	127932203	730	downstream	intronic	ADARB1	0.130435	2	10	0.2	1	12	0.0833333	0	1	0	0	0	45	0	0	15	0	0	10	0	0	0	2	0	0	0	NA	0	2	0
chr1	127932220	+	A	chr1:127932220	Rab3gap1	SINE	Intron	intron_variant	0	0	127931456	764	upstream	intronic	ADAR	0.107143	1	8	0.125	2	7	0.285714	0	13	0	0	0	14	0	0	2	0	0	10	0	0.125	1	3	0.333333	0	3	0	0	2	0
chr1	127933036	+	A	chr1:127933036	Rab3gap1	SINE	Intron	intron_variant	0	0	127932198	838	upstream	intronic	ADARB1	0.291139	3	24	0.125	11	32	0.34375	9	23	0.391304	0	0	50	0	0	48	0	0	10	0	0	0	13	0	0	21	0	0	19	0
chr1	128053220	-	T	chr1:128053220	Zranb3	SINE	Intron	non_coding_transcript_variant	0	0	-	-	-	-	ADAR	0.307692	4	9	0.444444	2	8	0.25	2	9	0.222222	0	0	24	0	0	12	0	0	10	0	0.166667	0	0	NA	2	6	0.333333	0	6	0
chr1	128066932	-	T	chr1:128066932	Zranb3	LTR	Intron	non_coding_transcript_variant	0	0	-	-	-	-	ADAR	0.35	1	2	0.5	3	6	0.5	3	12	0.25	0	0	6	0	0	8	0	0	10	0	0.333333	2	2	1	0	2	0	0	2	0
chr1	128109045	+	A	chr1:128109045	R3hdm1	SINE	Intron	non_coding_transcript_exon_variant	0	0	128110570	1525	downstream	intronic	ADARB1	0.092437	4	49	0.0816327	0	25	0	7	45	0.155556	0	0	43	0	0	25	0	0	18	0	0	0	14	0	0	20	0	0	21	0
chr1	128109770	+	A	chr1:128109770	R3hdm1	SINE	Intron	non_coding_transcript_exon_variant	0	0	128111728	1958	downstream	Intron	ADAR	0.142857	7	18	0.388889	0	18	0	1	20	0.05	0	0	19	0	0	19	0	0	26	0	0.0454545	1	16	0.0625	1	18	0.0555556	0	10	0
chr1	128109771	+	A	chr1:128109771	R3hdm1	SINE	Intron	non_coding_transcript_exon_variant	0	0	128111727	1956	downstream	intronic	ADAR	0.145455	6	18	0.333333	2	17	0.117647	0	20	0	0	0	19	0	0	19	0	0	27	0	0.0909091	1	16	0.0625	2	18	0.111111	1	10	0.1
chr1	128109800	+	A	chr1:128109800	R3hdm1	SINE	Intron	non_coding_transcript_exon_variant	0	0	-	-	-	-	ADAR	0.282609	3	14	0.214286	3	17	0.176471	7	15	0.466667	0	0	17	0	0	14	0	0	32	0	0.214286	0	8	0	2	14	0.142857	4	6	0.666667
chr1	128109808	+	A	chr1:128109808	R3hdm1	SINE	Intron	non_coding_transcript_exon_variant	0	0	128108802	1006	upstream	intronic	ADARB1	0.116279	3	12	0.25	0	16	0	2	15	0.133333	0	0	18	0	0	14	0	0	8	0	0	0	8	0	0	13	0	0	7	0
chr1	128109815	+	A	chr1:128109815	R3hdm1	SINE	Intron	non_coding_transcript_exon_variant	0	0	128108794	1021	upstream	intronic	ADARB1	0.317073	5	11	0.454545	4	17	0.235294	4	13	0.307692	0	0	16	0	0	15	0	0	3	0	0	0	8	0	0	10	0	0	7	0
chr1	128110540	+	A	chr1:128110540	R3hdm1	SINE	Intron	non_coding_transcript_exon_variant	0	0	128108788	1752	upstream	intronic	ADARB1	0.5	1	5	0.2	5	7	0.714286	2	4	0.5	0	0	10	0	0	4	0	0	31	0	0	0	10	0	0	6	0	0	6	0
chr1	128110554	+	A	chr1:128110554	R3hdm1	SINE	Intron	non_coding_transcript_exon_variant	0	0	128108774	1780	upstream	intronic	ADARB1	0.333333	1	5	0.2	2	7	0.285714	2	3	0.666667	0	0	10	0	0	4	0	0	2	0	0	0	9	0	0	6	0	0	5	0
chr1	128111652	+	A	chr1:128111652	R3hdm1	SINE	Intron	regulatory_region_variant	0	0	-	-	-	-	ADAR	0.104478	7	38	0.184211	5	38	0.131579	2	58	0.0344828	0	0	43	0	0	30	0	0	4	0	0.270833	9	26	0.346154	1	12	0.0833333	3	10	0.3
chr1	128111657	+	A	chr1:128111657	R3hdm1	SINE	Intron	regulatory_region_variant	0	0	-	-	-	-	ADAR	0.56391	24	38	0.631579	21	36	0.583333	30	59	0.508475	0	0	43	0	0	29	0	0	37	0	0.285714	10	26	0.384615	1	12	0.0833333	3	11	0.272727
chr1	128111671	+	A	chr1:128111671	R3hdm1	SINE	Intron	regulatory_region_variant	0	0	-	-	-	-	ADAR	0.406504	18	34	0.529412	17	35	0.485714	15	54	0.277778	0	0	41	0	0	32	0	0	19	0	0.0208333	1	20	0.05	0	13	0	0	15	0
chr1	128111693	+	A	chr1:128111693	R3hdm1	SINE	Intron	regulatory_region_variant	0	0	128110526	1167	upstream	intronic	ADARB1	0.0721649	2	30	0.0666667	4	25	0.16	1	42	0.0238095	0	0	32	0	0	26	0	0	18	0	0	0	19	0	0	15	0	0	13	0
chr1	128115294	+	A	chr1:128115294	R3hdm1	SINE	Intron	non_coding_transcript_variant	0	0	-	-	-	-	ADAR	0.230303	9	58	0.155172	14	53	0.264151	15	54	0.277778	0	0	66	0	0	57	0	0	13	0	0.0681818	0	38	0	2	22	0.0909091	4	28	0.142857
chr1	128120044	+	A	chr1:128120044	R3hdm1	SINE	Intron	non_coding_transcript_variant	0	0	128120920	876	downstream	intronic	ADAR	0.181818	5	22	0.227273	4	25	0.16	7	41	0.170732	0	0	30	0	0	39	0	0	12	0	0.0727273	2	23	0.0869565	1	12	0.0833333	1	20	0.05
chr1	128120058	+	A	chr1:128120058	R3hdm1	SINE	Intron	non_coding_transcript_variant	0	0	128120904	846	downstream	intronic	ADAR	0.0689655	0	25	0	2	35	0.0571429	6	56	0.107143	0	0	39	0	0	45	0	0	10	0	0.0163934	0	25	0	1	15	0.0666667	0	21	0
chr1	128121156	+	A	chr1:128121156	R3hdm1	SINE	Intron	regulatory_region_variant	0	0	-	-	-	-	ADAR	0.0366972	0	31	0	1	23	0.0434783	3	55	0.0545455	0	0	45	0	0	24	0	0	6	0	0.0210526	2	38	0.0526316	0	32	0	0	25	0
chr1	128122742	+	A	chr1:128122742	R3hdm1	SINE	Intron	non_coding_transcript_variant	0	0	-	-	-	-	ADAR	0.0322581	0	37	0	1	59	0.0169492	4	59	0.0677966	0	0	68	0	0	60	0	0	6	0	0.0125	1	27	0.037037	0	33	0	0	20	0
chr1	128163671	+	A	chr1:128163671	Gm37407,R3hdm1	SINE	Exon	non_coding_transcript_exon_variant	0	0	-	-	-	-	ADAR	0.0889488	9	106	0.0849057	8	101	0.0792079	16	164	0.097561	0	0	188	0	0	111	0	0	39	0	0.02	2	80	0.025	3	88	0.0340909	0	82	0
chr1	128163690	+	A	chr1:128163690	Gm37407,R3hdm1	SINE	Exon	non_coding_transcript_exon_variant	0	0	-	-	-	-	ADAR	0.104972	7	108	0.0648148	12	105	0.114286	19	149	0.127517	0	0	177	0	0	108	0	0	40	0	0.164062	14	82	0.170732	15	91	0.164835	13	83	0.156627
chr1	128163691	+	A	chr1:128163691	Gm37407,R3hdm1	SINE	Exon	non_coding_transcript_exon_variant	0	0	-	-	-	-	ADAR	0.1	9	107	0.0841121	11	102	0.107843	16	151	0.10596	0	0	177	0	0	107	0	0	40	0	0.146245	8	81	0.0987654	16	89	0.179775	13	83	0.156627
chr1	128163766	+	A	chr1:128163766	Gm37407,R3hdm1	SINE	Exon	non_coding_transcript_exon_variant	0	0	-	-	-	-	ADARB1	0.0313901	3	63	0.047619	1	68	0.0147059	3	92	0.0326087	0	0	123	0	0	89	0	0	30	0	0	0	65	0	0	69	0	0	85	0
chr1	128164633	+	A	chr1:128164633	Gm37407,R3hdm1	SINE	Intron	non_coding_transcript_variant	0	0	128163769	864	upstream	exonic	ADARB1	0.179487	4	24	0.166667	9	36	0.25	8	57	0.140351	0	0	78	0	0	36	0	0	78	0	0	0	30	0	0	27	0	0	21	0
chr1	128176521	+	A	chr1:128176521	R3hdm1	.	Intron	non_coding_transcript_exon_variant	0	0	-	-	-	-	ADAR	0.5	10	22	0.454545	7	21	0.333333	14	19	0.736842	0	0	22	0	0	22	0	0	29	0	0.0952381	0	15	0	3	23	0.130435	3	25	0.12
chr1	128176524	+	A	chr1:128176524	R3hdm1	.	Intron	non_coding_transcript_exon_variant	0	0	-	-	-	-	ADARB1	0.0645161	0	19	0	2	23	0.0869565	2	20	0.1	0	0	23	0	0	19	0	0	40	0	0	0	14	0	0	22	0	0	25	0
chr1	128176995	+	A	chr1:128176995	R3hdm1	.	Intron	non_coding_transcript_exon_variant	0	0	128177719	724	downstream	intronic	ADARB1	0.210084	11	42	0.261905	5	32	0.15625	9	45	0.2	0	0	36	0	0	34	0	0	28	0	0	0	14	0	0	13	0	0	14	0
chr1	128177030	+	A	chr1:128177030	R3hdm1	.	Intron	non_coding_transcript_exon_variant	0	0	-	-	-	-	ADARB1	0.0792079	4	43	0.0930233	4	27	0.148148	0	31	0	0	0	33	0	0	44	0	0	48	0	0	0	16	0	0	13	0	0	18	0
chr1	128190078	+	A	chr1:128190078	R3hdm1	SINE	Intron	intron_variant	1	1	-	-	-	-	not known	0.162791	17	117	0.145299	14	102	0.137255	32	168	0.190476	0.0145455	0	106	0	0	80	0	4	108	0.0449438	0.0496894	7	58	0.12069	1	55	0.0181818	0	48	0
chr1	128191585	+	A	chr1:128191585	R3hdm1	SINE	Intron	regulatory_region_variant	0	0	128192183	598	downstream	intronic	ADAR	0.0277186	4	140	0.0285714	1	147	0.00680272	8	182	0.043956	0	0	111	0	0	102	0	0	109	0	0.00438596	0	81	0	0	81	0	1	66	0.0151515
chr1	128192180	+	A	chr1:128192180	R3hdm1	SINE	Intron	intron_variant	0	0	-	-	-	-	ADAR	0.141805	35	197	0.177665	24	189	0.126984	18	157	0.11465	0	0	175	0	0	130	0	0	108	0	0.0235849	2	76	0.0263158	3	80	0.0375	0	56	0
chr1	128192181	+	A	chr1:128192181	R3hdm1	SINE	Intron	intron_variant	1	1	128191590	591	upstream	intronic	ADAR	0.128205	30	196	0.153061	16	190	0.0842105	24	160	0.15	0	0	176	0	0	132	0	0	80	0	0.0327103	4	77	0.0519481	2	80	0.025	1	57	0.0175439
chr1	128192189	+	A	chr1:128192189	R3hdm1	SINE	Intron	intron_variant	1	1	128191581	608	upstream	intronic	ADAR	0.306569	61	194	0.314433	67	193	0.34715	40	161	0.248447	0	0	175	0	0	133	0	0	53	0	0.086758	7	75	0.0933333	7	81	0.0864198	5	63	0.0793651
chr1	128192200	+	A	chr1:128192200	R3hdm1	SINE	Intron	intron_variant	0	0	128191571	629	upstream	intronic	ADARB1	0.0186916	7	193	0.0362694	1	185	0.00540541	2	157	0.0127389	0	0	170	0	0	131	0	0	21	0	0	0	84	0	0	88	0	0	65	0
chr1	128192215	+	A	chr1:128192215	R3hdm1	SINE	Intron	intron_variant	1	1	128191555	660	upstream	intronic	ADAR	0.0767754	17	184	0.0923913	11	183	0.0601093	12	154	0.0779221	0	0	169	0	0	123	0	0	21	0	0.00444444	0	74	0	0	87	0	1	64	0.015625
chr1	128192222	+	A	chr1:128192222	R3hdm1	SINE	Intron	intron_variant	1	1	128191549	673	upstream	intronic	ADARB1	0.0416667	13	173	0.0751445	5	168	0.0297619	2	139	0.0143885	0	0	153	0	0	116	0	0	19	0	0	0	73	0	0	86	0	0	68	0
chr1	128192236	+	A	chr1:128192236	R3hdm1	SINE	Intron	intron_variant	0	0	-	-	-	-	ADAR	0.0395349	10	159	0.0628931	4	144	0.0277778	3	127	0.023622	0	0	128	0	0	107	0	0	14	0	0.0138249	2	68	0.0294118	0	83	0	1	66	0.0151515
chr1	128212104	+	A	chr1:128212104	R3hdm1	SINE	Intron	non_coding_transcript_variant	0	0	128214294	2190	downstream	intronic	ADARB1	0.0773481	5	63	0.0793651	4	61	0.0655738	5	57	0.0877193	0	0	35	0	0	29	0	0	84	0	0	0	38	0	0	38	0	0	25	0
chr1	128212114	+	A	chr1:128212114	R3hdm1	SINE	Intron	non_coding_transcript_variant	0	0	128213788	1674	downstream	intronic	ADARB1	0.0418848	7	67	0.104478	1	62	0.016129	0	62	0	0	0	40	0	0	32	0	0	87	0	0	0	39	0	0	39	0	0	23	0
chr1	128212117	+	A	chr1:128212117	R3hdm1	SINE	Intron	non_coding_transcript_variant	0	0	128213786	1669	downstream	intronic	ADAR	0.065	8	70	0.114286	4	64	0.0625	1	66	0.0151515	0	0	42	0	0	33	0	0	87	0	0.0792079	3	38	0.0789474	4	40	0.1	1	23	0.0434783
chr1	128212149	+	A	chr1:128212149	R3hdm1	SINE	Intron	non_coding_transcript_variant	0	0	128214251	2102	downstream	intronic	ADARB1	0.0347826	1	95	0.0105263	4	71	0.056338	3	64	0.046875	0	0	57	0	0	41	0	0	88	0	0	0	32	0	0	37	0	0	21	0
chr1	128212153	+	A	chr1:128212153	R3hdm1	SINE	Intron	non_coding_transcript_variant	0	0	128214248	2095	downstream	intronic	ADARB1	0.0309735	6	94	0.0638298	0	68	0	1	64	0.015625	0	0	57	0	0	39	0	0	90	0	0	0	34	0	0	36	0	0	21	0
chr1	128212309	+	A	chr1:128212309	R3hdm1	SINE	Intron	non_coding_transcript_variant	0	0	128213756	1447	downstream	intronic	ADAR	0.162963	4	19	0.210526	9	38	0.236842	9	78	0.115385	0	0	35	0	0	29	0	0	94	0	0.0283019	0	35	0	1	38	0.0263158	2	33	0.0606061
chr1	128213806	+	A	chr1:128213806	R3hdm1	SINE	Intron	non_coding_transcript_variant	0	0	-	-	-	-	ADARB1	0.0344828	3	23	0.130435	0	34	0	1	59	0.0169492	0	0	26	0	0	12	0	0	91	0	0	0	19	0	0	15	0	0	18	0
chr1	128215219	+	A	chr1:128215219	R3hdm1	SINE	Intron	non_coding_transcript_variant	0	0	-	-	-	-	ADAR	0.253012	2	24	0.0833333	6	20	0.3	13	39	0.333333	0	0	24	0	0	16	0	0	76	0	0.177419	4	15	0.266667	5	28	0.178571	2	19	0.105263
chr1	128215225	+	A	chr1:128215225	R3hdm1	SINE	Intron	non_coding_transcript_variant	0	0	-	-	-	-	ADAR	0.166667	0	25	0	4	20	0.2	10	39	0.25641	0	0	21	0	0	15	0	0	71	0	0.0483871	1	14	0.0714286	0	29	0	2	19	0.105263
chr1	128215239	+	A	chr1:128215239	R3hdm1	SINE	Intron	non_coding_transcript_variant	0	0	128215408	169	downstream	intronic	ADARB1	0.0777778	0	27	0	2	22	0.0909091	5	41	0.121951	0	0	20	0	0	15	0	0	51	0	0	0	15	0	0	25	0	0	18	0
chr1	128226601	+	A	chr1:128226601	R3hdm1	SINE	Intron	non_coding_transcript_variant	0	0	128225155	1446	upstream	intronic	ADARB1	0.1875	1	10	0.1	1	1	1	1	5	0.2	0	0	16	0	0	6	0	0	58	0	0	0	2	0	0	2	0	0	0	NA
chr1	128238795	+	A	chr1:128238795	R3hdm1	SINE	intergenic	downstream_gene_variant	0	0	128238454	341	upstream	undefined	ADARB1	0.0555556	0	17	0	2	15	0.133333	1	22	0.0454545	0	0	20	0	0	24	0	0	57	0	0	0	9	0	0	15	0	0	10	0
chr1	128246510	+	A	chr1:128246510	Ubxn4	SINE	Intron	intron_variant	0	0	-	-	-	-	ADARB1	0.123077	2	17	0.117647	4	16	0.25	2	32	0.0625	0	0	37	0	0	18	0	0	57	0	0	0	13	0	0	3	0	0	5	0
chr1	128246511	+	A	chr1:128246511	Ubxn4	SINE	Intron	intron_variant	0	0	-	-	-	-	ADARB1	0.111111	3	18	0.166667	2	15	0.133333	2	30	0.0666667	0	0	41	0	0	17	0	0	56	0	0	0	15	0	0	4	0	0	5	0
chr1	128246707	+	A	chr1:128246707	Ubxn4	SINE	Intron	intron_variant	0	0	-	-	-	-	ADARB1	0.12	4	23	0.173913	2	15	0.133333	0	12	0	0	0	32	0	0	18	0	0	53	0	0	0	12	0	0	15	0	0	15	0
chr1	128246969	+	A	chr1:128246969	Ubxn4	SINE	Intron	intron_variant	0	0	128248284	1315	downstream	intronic	ADAR	0.777778	4	6	0.666667	0	0	NA	3	3	1	0	0	6	0	0	4	0	0	28	0	0.4	1	1	1	1	2	0.5	0	2	0
chr1	128247083	+	A	chr1:128247083	Ubxn4	SINE	Intron	regulatory_region_variant	0	0	128246966	117	upstream	intronic	ADARB1	0.666667	18	25	0.72	2	6	0.333333	16	23	0.695652	0	0	25	0	0	15	0	0	26	0	0	0	7	0	0	4	0	0	6	0
chr1	128253785	+	A	chr1:128253785	Ubxn4	SINE	Intron	intron_variant	0	0	128254810	1025	downstream	intronic	ADAR	0.185185	6	27	0.222222	4	18	0.222222	0	9	0	0	0	34	0	0	23	0	0	26	0	0.0192308	0	20	0	0	15	0	1	17	0.0588235
chr1	128254606	+	A	chr1:128254606	Ubxn4	SINE	Intron	intron_variant	0	0	-	-	-	-	ADARB1	0.142857	0	13	0	2	9	0.222222	4	20	0.2	0	0	32	0	0	22	0	0	30	0	0	0	11	0	0	8	0	0	7	0
chr1	128254620	+	A	chr1:128254620	Ubxn4	SINE	Intron	intron_variant	0	0	128255642	1022	downstream	intronic	ADAR	0.173913	2	15	0.133333	4	12	0.333333	2	19	0.105263	0	0	36	0	0	20	0	0	2	0	0.0384615	0	11	0	0	9	0	1	6	0.166667
chr1	128254932	+	A	chr1:128254932	Ubxn4	SINE	Intron	intron_variant	0	0	128253838	1094	upstream	intronic	ADAR	0.0793651	4	19	0.210526	0	15	0	1	29	0.0344828	0	0	50	0	0	34	0	0	21	0	0.0606061	2	8	0.25	0	16	0	0	9	0
chr1	128254952	+	A	chr1:128254952	Ubxn4	SINE	Intron	intron_variant	0	0	128253818	1134	upstream	intronic	ADAR	0.209677	5	19	0.263158	3	16	0.1875	5	27	0.185185	0	0	53	0	0	35	0	0	24	0	0.193548	3	8	0.375	2	14	0.142857	1	9	0.111111
chr1	128254959	+	A	chr1:128254959	Ubxn4	SINE	Intron	intron_variant	0	0	128253811	1148	upstream	intronic	ADARB1	0.0806452	2	19	0.105263	2	18	0.111111	1	25	0.04	0	0	52	0	0	37	0	0	24	0	0	0	8	0	0	15	0	0	9	0
chr1	128254969	+	A	chr1:128254969	Ubxn4	SINE	Intron	intron_variant	0	0	128253802	1167	upstream	intronic	ADARB1	0.0677966	2	15	0.133333	0	20	0	2	24	0.0833333	0	0	45	0	0	33	0	0	12	0	0	0	8	0	0	15	0	0	7	0
chr1	128254983	+	A	chr1:128254983	Ubxn4	SINE	Intron	intron_variant	0	0	128253788	1195	upstream	intronic	ADAR	0.142857	1	15	0.0666667	3	18	0.166667	4	23	0.173913	0	0	48	0	0	34	0	0	1	0	0.0714286	2	9	0.222222	0	13	0	0	6	0
chr1	128265096	+	A	chr1:128265096	Ubxn4	SINE	Intron	non_coding_transcript_variant	0	0	-	-	-	-	ADARB1	0.115385	2	8	0.25	1	3	0.333333	0	15	0	0	0	11	0	0	7	0	0	9	0	0	0	5	0	0	4	0	0	7	0
chr1	128265292	+	A	chr1:128265292	Ubxn4	SINE	Intron	non_coding_transcript_variant	0	0	128265676	384	downstream	intronic	ADAR	0.2	2	11	0.181818	3	12	0.25	2	12	0.166667	0	0	11	0	0	11	0	0	16	0	0.0555556	0	5	0	0	5	0	1	8	0.125
chr1	128265532	+	A	chr1:128265532	Ubxn4	SINE	Intron	non_coding_transcript_variant	0	0	-	-	-	-	ADAR	0.12766	2	13	0.153846	3	10	0.3	1	24	0.0416667	0	0	30	0	0	16	0	0	20	0	0.0625	0	7	0	2	13	0.153846	0	12	0
chr1	128265544	+	A	chr1:128265544	Ubxn4	SINE	Intron	non_coding_transcript_variant	0	0	-	-	-	-	ADARB1	0.0666667	0	12	0	1	9	0.111111	2	24	0.0833333	0	0	29	0	0	17	0	0	18	0	0	0	6	0	0	12	0	0	8	0
chr1	128265547	+	A	chr1:128265547	Ubxn4	SINE	Intron	non_coding_transcript_variant	0	0	128265632	85	downstream	intronic	ADAR	0.133333	2	12	0.166667	3	10	0.3	1	23	0.0434783	0	0	29	0	0	17	0	0	29	0	0.08	0	6	0	2	11	0.181818	0	8	0
chr1	128265682	+	A	chr1:128265682	Ubxn4	SINE	Intron	non_coding_transcript_variant	0	0	128265102	580	upstream	intronic	ADAR	0.210526	2	7	0.285714	0	4	0	2	8	0.25	0	0	18	0	0	15	0	0	26	0	0.0526316	0	4	0	1	6	0.166667	0	9	0
chr1	128273904	+	A	chr1:128273904	Ubxn4	SINE	Intron	intron_variant	1	1	-	-	-	-	ADAR	0.138889	4	45	0.0888889	14	57	0.245614	7	78	0.0897436	0	0	90	0	0	75	0	0	23	0	0.0222222	0	30	0	2	36	0.0555556	0	24	0
chr1	128274557	+	A	chr1:128274557	Ubxn4	SINE	Intron	intron_variant	0	0	128272931	1626	upstream	exonic	ADARB1	0.0813008	5	43	0.116279	0	44	0	5	36	0.138889	0	0	74	0	0	35	0	0	22	0	0	0	24	0	0	16	0	0	24	0
chr1	128370850	-	T	chr1:128370850	Dars	LTR	Intron	intron_variant	0	0	-	-	-	-	ADARB1	0.0666667	3	25	0.12	0	31	0	2	19	0.105263	0	0	20	0	0	23	0	0	7	0	0	0	7	0	0	9	0	0	6	0
chr1	128373091	-	T	chr1:128373091	Dars	SINE	Intron	regulatory_region_variant	0	0	128373668	577	upstream	intronic	ADAR	0.206897	3	14	0.214286	3	11	0.272727	0	4	0	0	0	6	0	0	6	0	0	11	0	0.0769231	0	6	0	1	4	0.25	0	3	0
chr1	128377586	-	T	chr1:128377586	Dars	SINE	Intron	non_coding_transcript_variant	0	0	128376809	777	downstream	intronic	ADAR	0.363636	2	7	0.285714	2	3	0.666667	0	1	0	0	0	3	0	0	17	0	0	15	0	0.0833333	0	4	0	1	3	0.333333	0	5	0
chr1	128407245	-	T	chr1:128407245	Dars	SINE	Intron	regulatory_region_variant	0	0	-	-	-	-	ADARB1	0.113636	0	9	0	2	14	0.142857	3	21	0.142857	0	0	10	0	0	20	0	0	16	0	0	0	13	0	0	11	0	0	13	0
chr1	128411517	-	T	chr1:128411517	Dars	SINE	Intron	intron_variant	0	0	128412018	501	upstream	intronic	ADARB1	0.153846	0	8	0	1	8	0.125	3	10	0.3	0	0	2	0	0	3	0	0	16	0	0	0	2	0	0	3	0	0	1	0
chr1	129316889	+	A	chr1:129316889	Thsd7b	LINE	Intron	non_coding_transcript_variant	0	0	-	-	-	-	ADARB1	0.3125	1	5	0.2	0	4	0	4	7	0.571429	0	0	3	0	0	11	0	0	9	0	0	0	9	0	0	4	0	0	5	0
chr1	129431286	+	A	chr1:129431286	Thsd7b	SINE	Intron	non_coding_transcript_variant	0	0	-	-	-	-	ADARB1	0.189189	3	9	0.333333	0	13	0	4	15	0.266667	0	0	6	0	0	6	0	0	57	0	0	0	4	0	0	3	0	0	2	0
chr1	129433621	+	A	chr1:129433621	Thsd7b	SINE	Intron	non_coding_transcript_variant	0	0	-	-	-	-	ADAR	0.222222	3	11	0.272727	2	12	0.166667	3	13	0.230769	0	0	8	0	0	6	0	0	72	0	0.0909091	0	2	0	1	2	0.5	0	7	0
chr1	129454327	+	A	chr1:129454327	Thsd7b	LINE	Intron	non_coding_transcript_variant	0	0	129456262	1935	downstream	intronic	ADAR	0.9	5	5	1	3	3	1	1	2	0.5	0	0	2	0	0	4	0	0	70	0	0.5	2	4	0.5	1	2	0.5	1	2	0.5
chr1	129454354	+	A	chr1:129454354	Thsd7b	LINE	Intron	non_coding_transcript_variant	0	0	-	-	-	-	ADAR	0.714286	4	4	1	1	2	0.5	0	1	0	0	0	1	0	0	2	0	0	28	0	0.333333	2	3	0.666667	0	2	0	0	1	0
chr1	129456256	+	A	chr1:129456256	Thsd7b	LINE	Intron	non_coding_transcript_variant	0	0	129454334	1922	upstream	intronic	ADARB1	0.148148	2	5	0.4	0	6	0	2	16	0.125	0	0	7	0	0	12	0	0	22	0	0	0	3	0	0	5	0	0	1	0
chr1	129717288	+	A	chr1:129717288	Gm36951,Thsd7b	LINE	Intron	intron_variant	0	0	-	-	-	-	ADAR	0.2	1	12	0.0833333	4	7	0.571429	0	6	0	0	0	11	0	0	14	0	0	7	0	0.285714	2	4	0.5	0	1	0	0	2	0
chr1	129870726	+	A	chr1:129870726	Thsd7b	LINE	Intron	intron_variant	0	0	-	-	-	-	ADAR	0.583333	6	6	1	5	9	0.555556	3	9	0.333333	0	0	7	0	0	10	0	0	1	0	0.285714	1	4	0.25	1	1	1	0	2	0
chr1	129870752	+	A	chr1:129870752	Thsd7b	LINE	Intron	intron_variant	0	0	-	-	-	-	ADAR	0.25	1	6	0.166667	3	9	0.333333	2	9	0.222222	0	0	6	0	0	9	0	0	17	0	0.142857	0	5	0	1	1	1	0	1	0
chr1	129870801	+	A	chr1:129870801	Thsd7b	LINE	Intron	intron_variant	0	0	129870404	397	upstream	intronic	ADARB1	0.586207	8	10	0.8	5	9	0.555556	4	10	0.4	0	0	8	0	0	9	0	0	10	0	0	0	4	0	0	0	NA	0	2	0
chr1	129964447	+	A	chr1:129964447	Thsd7b	.	Intron	non_coding_transcript_variant	0	0	129965459	1012	downstream	intronic	ADAR	0.294118	0	2	0	2	5	0.4	3	10	0.3	0	0	7	0	0	13	0	0	6	0	0.0769231	0	5	0	1	3	0.333333	0	5	0
chr1	129964466	+	A	chr1:129964466	Thsd7b	.	Intron	non_coding_transcript_variant	0	0	129965443	977	downstream	intronic	ADAR	0.388889	1	4	0.25	3	4	0.75	3	10	0.3	0	0	5	0	0	12	0	0	18	0	0.0714286	0	6	0	1	3	0.333333	0	5	0
chr1	129964472	+	A	chr1:129964472	Thsd7b	.	Intron	non_coding_transcript_variant	0	0	129965434	962	downstream	intronic	ADAR	0.25	0	5	0	2	4	0.5	3	11	0.272727	0	0	5	0	0	13	0	0	16	0	0.142857	0	6	0	0	3	0	2	5	0.4
chr1	129964478	+	A	chr1:129964478	Thsd7b	.	Intron	non_coding_transcript_variant	0	0	129965429	951	downstream	intronic	ADARB1	0.157895	1	5	0.2	0	3	0	2	11	0.181818	0	0	5	0	0	13	0	0	5	0	0	0	6	0	0	2	0	0	5	0
chr1	129965388	+	A	chr1:129965388	Thsd7b	.	Intron	non_coding_transcript_variant	0	0	129964518	870	upstream	intronic	ADARB1	0.222222	1	3	0.333333	0	3	0	1	3	0.333333	0	0	3	0	0	6	0	0	4	0	0	0	5	0	0	3	0	0	4	0
chr1	129965397	+	A	chr1:129965397	Thsd7b	.	Intron	non_coding_transcript_variant	0	0	129964509	888	upstream	intronic	ADAR	0.222222	1	3	0.333333	0	3	0	1	3	0.333333	0	0	4	0	0	6	0	0	9	0	0.1	1	5	0.2	0	3	0	0	2	0
chr1	129965415	+	A	chr1:129965415	Thsd7b	.	Intron	non_coding_transcript_variant	0	0	129964492	923	upstream	intronic	ADAR	0.571429	2	4	0.5	2	4	0.5	4	6	0.666667	0	0	2	0	0	5	0	0	6	0	0.0833333	0	7	0	0	3	0	1	2	0.5
chr1	129965444	+	A	chr1:129965444	Thsd7b	.	Intron	non_coding_transcript_variant	0	0	129964461	983	upstream	intronic	ADARB1	0.222222	1	6	0.166667	1	5	0.2	2	7	0.285714	0	0	1	0	0	6	0	0	17	0	0	0	6	0	0	2	0	0	2	0
chr1	129965453	+	A	chr1:129965453	Thsd7b	.	Intron	non_coding_transcript_variant	0	0	129964453	1000	upstream	intronic	ADARB1	0.210526	0	5	0	3	6	0.5	1	8	0.125	0	0	1	0	0	6	0	0	16	0	0	0	5	0	0	3	0	0	2	0
chr1	130133632	+	A	chr1:130133632	Thsd7b	LINE	Intron	non_coding_transcript_variant	0	0	-	-	-	-	ADARB1	0.25	1	6	0.166667	0	3	0	2	3	0.666667	0	0	3	0	0	4	0	0	17	0	0	0	8	0	0	11	0	0	2	0
chr1	130480191	+	A	chr1:130480191	Gm16083,Gm37283	LTR	Intron	non_coding_transcript_variant	0	0	-	-	-	-	ADAR	0.16	2	13	0.153846	2	5	0.4	0	7	0	0	0	10	0	0	4	0	0	20	0	0.333333	0	1	0	0	2	0	2	3	0.666667
chr1	130480198	+	A	chr1:130480198	Gm16083,Gm37283	LTR	Intron	non_coding_transcript_variant	0	0	-	-	-	-	ADAR	0.269231	5	14	0.357143	2	5	0.4	0	7	0	0	0	10	0	0	5	0	0	19	0	0.666667	0	1	0	2	2	1	2	3	0.666667
chr1	130480204	-	T	chr1:130480204	Gm16083,Gm37283	LTR	Intron	non_coding_transcript_variant	0	0	-	-	-	-	ADARB1	0.125	2	15	0.133333	0	4	0	1	5	0.2	0	0	11	0	0	6	0	0	18	0	0	0	1	0	0	2	0	0	3	0
chr1	130480205	-	T	chr1:130480205	Gm16083,Gm37283	LTR	Intron	non_coding_transcript_variant	0	0	-	-	-	-	ADARB1	0.2	2	15	0.133333	0	5	0	3	5	0.6	0	0	11	0	0	6	0	0	17	0	0	0	1	0	0	2	0	0	3	0
chr1	130480379	+	A	chr1:130480379	Gm16083	LTR	Intron	non_coding_transcript_variant	0	0	-	-	-	-	ADARB1	0.1875	4	22	0.181818	0	1	0	2	9	0.222222	0	0	6	0	0	8	0	0	5	0	0	0	5	0	0	2	0	0	3	0
chr1	130482903	+	A	chr1:130482903	Gm16083	LTR	Intron	non_coding_transcript_variant	0	0	-	-	-	-	ADARB1	0.37931	6	15	0.4	3	7	0.428571	2	7	0.285714	0	0	15	0	0	13	0	0	7	0	0	0	1	0	0	0	NA	0	2	0
chr1	130482911	+	A	chr1:130482911	Gm16083	LTR	Intron	non_coding_transcript_variant	0	0	-	-	-	-	ADAR	0.272727	6	16	0.375	1	9	0.111111	2	8	0.25	0	0	17	0	0	14	0	0	7	0	0.25	1	1	1	0	1	0	0	2	0
chr1	130482943	+	A	chr1:130482943	Gm16083	LTR	Intron	non_coding_transcript_variant	0	0	-	-	-	-	ADAR	0.333333	6	15	0.4	3	12	0.25	4	12	0.333333	0	0	16	0	0	11	0	0	5	0	0.285714	2	2	1	0	2	0	0	3	0
chr1	130483019	+	A	chr1:130483019	Gm16083	LTR	Intron	non_coding_transcript_variant	0	0	-	-	-	-	ADAR	0.487805	6	14	0.428571	7	13	0.538462	7	14	0.5	0	0	17	0	0	11	0	0	5	0	0.8	3	4	0.75	3	3	1	2	3	0.666667
chr1	130483022	+	A	chr1:130483022	Gm16083	LTR	Intron	non_coding_transcript_variant	0	0	-	-	-	-	ADAR	0.463415	5	13	0.384615	7	14	0.5	7	14	0.5	0	0	16	0	0	10	0	0	2	0	0.8	3	4	0.75	3	3	1	2	3	0.666667
chr1	130483071	+	A	chr1:130483071	Gm16083	LTR	Intron	non_coding_transcript_variant	0	0	-	-	-	-	ADAR	0.209302	4	15	0.266667	1	10	0.1	4	18	0.222222	0	0	15	0	0	9	0	0	7	0	0.3	0	3	0	3	4	0.75	0	3	0
chr1	130483095	+	A	chr1:130483095	Gm16083	LTR	Intron	non_coding_transcript_variant	0	0	-	-	-	-	ADARB1	0.264706	5	13	0.384615	0	6	0	4	15	0.266667	0	0	10	0	0	9	0	0	7	0	0	0	3	0	0	6	0	0	2	0
chr1	130483096	+	A	chr1:130483096	Gm16083	LTR	Intron	non_coding_transcript_variant	0	0	-	-	-	-	ADAR	0.176471	3	12	0.25	3	6	0.5	0	16	0	0	0	9	0	0	9	0	0	7	0	0.181818	2	3	0.666667	0	6	0	0	2	0
chr1	130508730	+	A	chr1:130508730	Gm16083	.	Intron	regulatory_region_variant	0	0	-	-	-	-	ADARB1	0.173913	2	15	0.133333	0	15	0	6	16	0.375	0	0	4	0	0	14	0	0	7	0	0	0	6	0	0	2	0	0	2	0
chr1	130523002	+	A	chr1:130523002	Gm16083	.	Intron	non_coding_transcript_variant	0	0	-	-	-	-	ADARB1	0.2	1	3	0.333333	1	2	0.5	0	5	0	0	0	1	0	0	3	0	0	1	0	0	0	0	NA	0	3	0	0	2	0
chr1	131166066	+	A	chr1:131166066	Eif2d	SINE	Intron	NMD_transcript_variant	0	0	131166996	930	downstream	intronic	ADAR	0.0813953	3	32	0.09375	1	28	0.0357143	3	26	0.115385	0	0	22	0	0	11	0	0	5	0	0.129032	2	10	0.2	2	13	0.153846	0	8	0
chr1	131175571	+	A	chr1:131175571	Eif2d,Rassf5	SINE	Intron	NMD_transcript_variant	0	0	-	-	-	-	ADARB1	0.0434783	1	39	0.025641	0	24	0	3	29	0.103448	0	0	11	0	0	29	0	0	5	0	0	0	9	0	0	19	0	0	10	0
chr1	131175572	+	A	chr1:131175572	Eif2d,Rassf5	SINE	Intron	NMD_transcript_variant	0	0	-	-	-	-	ADARB1	0.0326087	2	39	0.0512821	0	24	0	1	29	0.0344828	0	0	11	0	0	28	0	0	7	0	0	0	9	0	0	17	0	0	10	0
chr1	131175601	+	A	chr1:131175601	Eif2d,Rassf5	SINE	Intron	NMD_transcript_variant	1	1	131174949	652	upstream	intronic	ADAR	0.146341	1	33	0.030303	8	21	0.380952	3	28	0.107143	0	0	10	0	0	23	0	0	9	0	0.030303	0	8	0	1	16	0.0625	0	9	0
chr1	131175602	+	A	chr1:131175602	Eif2d,Rassf5	SINE	Intron	NMD_transcript_variant	0	0	131174948	654	upstream	intronic	ADAR	0.0379747	1	33	0.030303	0	20	0	2	26	0.0769231	0	0	10	0	0	22	0	0	9	0	0.0294118	0	9	0	1	16	0.0625	0	9	0
chr1	131187813	+	A	chr1:131187813	Eif2d,Rassf5	SINE	Intron	intron_variant	0	0	-	-	-	-	ADARB1	0.0882353	7	46	0.152174	2	31	0.0645161	0	25	0	0	0	35	0	0	31	0	0	8	0	0	0	5	0	0	8	0	0	7	0
chr1	131208166	-	T	chr1:131208166	Rassf5	.	Intron	regulatory_region_variant	0	0	131210538	2372	upstream	intronic	ADARB1	0.172414	3	11	0.272727	1	12	0.0833333	1	6	0.166667	0	0	13	0	0	18	0	0	5	0	0	0	6	0	0	2	0	0	0	NA
chr1	131210515	-	T	chr1:131210515	Rassf5	DNA	Intron	non_coding_transcript_variant	0	0	131208193	2322	downstream	intronic	ADAR	0.1	1	11	0.0909091	0	10	0	3	19	0.157895	0	0	25	0	0	8	0	0	4	0	0.142857	0	5	0	0	4	0	2	5	0.4
chr1	131317574	-	T	chr1:131317574	Srgap2	.	Intron	regulatory_region_variant	0	0	131318289	715	upstream	intronic	ADARB1	0.0224439	0	101	0	4	144	0.0277778	5	156	0.0320513	0	0	155	0	0	188	0	0	7	0	0	0	95	0	0	94	0	0	79	0
chr1	131317584	-	T	chr1:131317584	Srgap2	.	Intron	regulatory_region_variant	0	0	131318279	695	upstream	intronic	ADAR	0.165563	12	113	0.106195	40	167	0.239521	23	173	0.132948	0	0	163	0	0	192	0	0	7	0	0.00363636	0	93	0	0	102	0	1	80	0.0125
chr1	131317605	-	T	chr1:131317605	Srgap2	.	Intron	regulatory_region_variant	0	0	131318258	653	upstream	intronic	ADARB1	0.0347072	1	118	0.00847458	13	173	0.0751445	2	170	0.0117647	0	0	172	0	0	203	0	0	10	0	0	0	101	0	0	108	0	0	86	0
chr1	131317610	-	T	chr1:131317610	Srgap2	.	Intron	regulatory_region_variant	0	0	131318253	643	upstream	intronic	ADAR	0.0567686	7	120	0.0583333	13	168	0.077381	6	170	0.0352941	0	0	167	0	0	202	0	0	17	0	0.00321543	1	108	0.00925926	0	105	0	0	98	0
chr1	131318271	-	T	chr1:131318271	Srgap2	.	Intron	regulatory_region_variant	0	0	131317592	679	downstream	intronic	ADARB1	0.139966	30	171	0.175439	16	180	0.0888889	37	242	0.152893	0	0	198	0	0	211	0	0	17	0	0	0	122	0	0	103	0	0	104	0
chr1	131318275	-	T	chr1:131318275	Srgap2	.	Intron	regulatory_region_variant	0	0	131317588	687	downstream	intronic	ADARB1	0.0391823	9	167	0.0538922	8	180	0.0444444	6	240	0.025	0	0	196	0	0	208	0	0	12	0	0	0	121	0	0	98	0	0	97	0
chr1	131318284	-	T	chr1:131318284	Srgap2	.	Intron	regulatory_region_variant	0	0	131317579	705	downstream	intronic	ADAR	0.039356	7	155	0.0451613	4	181	0.0220994	11	223	0.0493274	0	0	192	0	0	197	0	0	12	0	0.00327869	0	109	0	1	100	0.01	0	96	0
chr1	131318285	-	T	chr1:131318285	Srgap2	.	Intron	regulatory_region_variant	0	0	131317579	706	downstream	intronic	ADARB1	0.0339893	7	155	0.0451613	4	179	0.0223464	8	225	0.0355556	0	0	193	0	0	197	0	0	55	0	0	0	110	0	0	98	0	0	97	0
chr1	131359127	-	T	chr1:131359127	Srgap2	SINE	Intron	intron_variant	0	0	131360747	1620	upstream	intronic	ADAR	0.0931677	7	48	0.145833	0	48	0	8	65	0.123077	0	0	47	0	0	32	0	0	9	0	0.0307692	0	41	0	2	50	0.04	2	39	0.0512821
chr1	131359131	-	T	chr1:131359131	Srgap2	SINE	Intron	intron_variant	0	0	131360745	1614	upstream	intronic	ADAR	0.0844156	6	50	0.12	1	43	0.0232558	6	61	0.0983607	0	0	42	0	0	30	0	0	10	0	0.048	1	40	0.025	3	50	0.06	2	35	0.0571429
chr1	131359132	-	T	chr1:131359132	Srgap2	SINE	Intron	intron_variant	0	0	131360743	1611	upstream	intronic	ADAR	0.165563	11	50	0.22	5	40	0.125	9	61	0.147541	0	0	37	0	0	31	0	0	233	0	0.0230769	1	40	0.025	1	50	0.02	1	40	0.025
chr1	131359149	-	T	chr1:131359149	Srgap2	SINE	Intron	intron_variant	0	0	131360726	1577	upstream	intronic	ADAR	0.138686	8	50	0.16	2	38	0.0526316	9	49	0.183673	0	0	30	0	0	20	0	0	250	0	0.0564516	1	41	0.0243902	4	51	0.0784314	2	32	0.0625
chr1	131359151	-	T	chr1:131359151	Srgap2	SINE	Intron	intron_variant	0	0	131360724	1573	upstream	intronic	ADAR	0.291045	17	49	0.346939	5	35	0.142857	17	50	0.34	0	0	29	0	0	20	0	0	251	0	0.204918	10	40	0.25	11	50	0.22	4	32	0.125
chr1	131359162	-	T	chr1:131359162	Srgap2	SINE	Intron	intron_variant	0	0	-	-	-	-	ADAR	0.218045	12	50	0.24	5	35	0.142857	12	48	0.25	0	0	29	0	0	22	0	0	255	0	0.130769	7	44	0.159091	5	52	0.0961538	5	34	0.147059
chr1	131359167	-	T	chr1:131359167	Srgap2	SINE	Intron	intron_variant	0	0	-	-	-	-	ADAR	0.198473	13	49	0.265306	2	34	0.0588235	11	48	0.229167	0	0	31	0	0	21	0	0	323	0	0.0661157	3	42	0.0714286	1	48	0.0208333	4	31	0.129032
chr1	131359179	-	T	chr1:131359179	Srgap2	SINE	Intron	intron_variant	0	0	131360695	1516	upstream	intronic	ADARB1	0.0992366	5	50	0.1	1	37	0.027027	7	44	0.159091	0	0	29	0	0	25	0	0	323	0	0	0	41	0	0	51	0	0	31	0
chr1	131360726	-	T	chr1:131360726	Srgap2	SINE	Intron	intron_variant	0	0	131362296	1570	upstream	Intron	ADAR	0.0597015	4	58	0.0689655	2	21	0.0952381	2	55	0.0363636	0	0	28	0	0	19	0	0	310	0	0.012987	0	21	0	1	26	0.0384615	0	30	0
chr1	131360728	-	T	chr1:131360728	Srgap2	SINE	Intron	intron_variant	0	0	-	-	-	-	ADARB1	0.0364964	2	58	0.0344828	3	21	0.142857	0	58	0	0	0	27	0	0	19	0	0	308	0	0	0	21	0	0	25	0	0	30	0
chr1	131360738	-	T	chr1:131360738	Srgap2	SINE	Intron	intron_variant	0	0	131359137	1601	downstream	intronic	ADARB1	0.0529801	5	65	0.0769231	1	23	0.0434783	2	63	0.031746	0	0	29	0	0	20	0	0	95	0	0	0	23	0	0	33	0	0	38	0
chr1	131360743	-	T	chr1:131360743	Srgap2	SINE	Intron	intron_variant	0	0	131359133	1610	downstream	intronic	ADARB1	0.0375	3	68	0.0441176	2	27	0.0740741	1	65	0.0153846	0	0	31	0	0	23	0	0	86	0	0	0	29	0	0	38	0	0	41	0
chr1	131360768	-	T	chr1:131360768	Srgap2	SINE	Intron	intron_variant	0	0	-	-	-	-	ADARB1	0.0315789	4	76	0.0526316	0	41	0	2	73	0.0273973	0	0	44	0	0	38	0	0	82	0	0	0	35	0	0	44	0	0	48	0
chr1	131412815	-	T	chr1:131412815	Gm29488,Srgap2	SINE	Intron	non_coding_transcript_variant	0	0	-	-	-	-	ADARB1	0.078125	2	26	0.0769231	2	15	0.133333	1	23	0.0434783	0	0	12	0	0	11	0	0	75	0	0	0	22	0	0	7	0	0	14	0
chr1	131412852	-	T	chr1:131412852	Gm29488,Srgap2	SINE	Intron	non_coding_transcript_variant	0	0	-	-	-	-	ADARB1	0.25974	5	31	0.16129	13	21	0.619048	2	25	0.08	0	0	14	0	0	17	0	0	69	0	0	0	24	0	0	12	0	0	15	0
chr1	131413125	-	T	chr1:131413125	Gm29488,Srgap2	SINE	Intron	non_coding_transcript_variant	0	0	131414704	1579	upstream	intronic	ADAR	0.0413223	0	36	0	2	28	0.0714286	3	57	0.0526316	0	0	18	0	0	26	0	0	70	0	0.0714286	0	14	0	3	13	0.230769	0	15	0
chr1	131413146	-	T	chr1:131413146	Gm29488,Srgap2	SINE	Intron	non_coding_transcript_variant	0	0	-	-	-	-	ADAR	0.037037	3	42	0.0714286	1	30	0.0333333	1	63	0.015873	0	0	20	0	0	31	0	0	74	0	0.0545455	2	23	0.0869565	1	16	0.0625	0	16	0
chr1	131414687	-	T	chr1:131414687	Srgap2	SINE	Intron	non_coding_transcript_variant	0	0	-	-	-	-	ADARB1	0.0483871	3	51	0.0588235	0	49	0	6	86	0.0697674	0	0	37	0	0	35	0	0	76	0	0	0	41	0	0	28	0	0	18	0
chr1	131437797	-	T	chr1:131437797	Srgap2	SINE	Intron	regulatory_region_variant	0	0	131437308	489	downstream	intronic	ADAR	0.137931	6	30	0.2	1	11	0.0909091	1	17	0.0588235	0	0	22	0	0	32	0	0	35	0	0.186047	1	10	0.1	3	14	0.214286	4	19	0.210526
chr1	13144545	-	T	chr1:13144545	Ncoa2	SINE	Intron	intron_variant	0	0	-	-	-	-	ADAR	0.150943	2	18	0.111111	3	17	0.176471	3	18	0.166667	0	0	24	0	0	18	0	0	25	0	0.0555556	0	4	0	0	8	0	1	6	0.166667
chr1	131470835	-	T	chr1:131470835	Srgap2	SINE	Intron	regulatory_region_variant	0	0	-	-	-	-	ADARB1	0.0211082	1	101	0.00990099	2	106	0.0188679	5	172	0.0290698	0	0	70	0	0	103	0	0	34	0	0	0	68	0	0	49	0	0	58	0
chr1	131470851	-	T	chr1:131470851	Srgap2	SINE	Intron	regulatory_region_variant	0	0	-	-	-	-	ADAR	0.0223464	0	98	0	3	101	0.029703	5	159	0.0314465	0	0	63	0	0	86	0	0	36	0	0.00689655	0	59	0	0	43	0	1	43	0.0232558
chr1	131474656	-	T	chr1:131474656	Srgap2	SINE	Intron	non_coding_transcript_variant	0	0	131473105	1551	downstream	intronic	ADARB1	0.0215633	5	157	0.0318471	0	107	0	3	107	0.0280374	0	0	53	0	0	78	0	0	42	0	0	0	73	0	0	68	0	0	68	0
chr1	131475281	-	T	chr1:131475281	Srgap2	SINE	Intron	non_coding_transcript_variant	0	0	-	-	-	-	ADARB1	0.0277008	5	129	0.0387597	1	96	0.0104167	4	136	0.0294118	0	0	45	0	0	64	0	0	66	0	0	0	114	0	0	82	0	0	99	0
chr1	131475336	-	T	chr1:131475336	Srgap2	SINE	Intron	non_coding_transcript_variant	0	0	-	-	-	-	ADARB1	0.0485175	1	118	0.00847458	5	107	0.046729	12	146	0.0821918	0	0	53	0	0	94	0	0	16	0	0	0	113	0	0	75	0	0	91	0
chr1	131475339	-	T	chr1:131475339	Srgap2	SINE	Intron	non_coding_transcript_variant	0	0	-	-	-	-	ADAR	0.0599455	9	118	0.0762712	3	104	0.0288462	10	145	0.0689655	0	0	53	0	0	90	0	0	27	0	0.047619	5	110	0.0454545	1	72	0.0138889	7	91	0.0769231
chr1	131475340	-	T	chr1:131475340	Srgap2	SINE	Intron	non_coding_transcript_variant	0	0	-	-	-	-	ADAR	0.0189702	5	121	0.0413223	1	105	0.00952381	1	143	0.00699301	0	0	54	0	0	93	0	0	38	0	0.0405904	6	109	0.0550459	1	73	0.0136986	4	89	0.0449438
chr1	131499551	-	T	chr1:131499551	Gm24273,Srgap2	SINE	Intron	non_coding_transcript_variant	0	0	-	-	-	-	ADARB1	0.143478	9	64	0.140625	10	66	0.151515	14	100	0.14	0	0	38	0	0	80	0	0	41	0	0	0	75	0	0	64	0	0	50	0
chr1	131499552	-	T	chr1:131499552	Gm24273,Srgap2	SINE	Intron	non_coding_transcript_variant	0	0	-	-	-	-	ADARB1	0.303419	24	64	0.375	14	64	0.21875	33	106	0.311321	0	0	39	0	0	79	0	0	55	0	0	0	75	0	0	65	0	0	52	0
chr1	131499557	-	T	chr1:131499557	Gm24273,Srgap2	SINE	Intron	non_coding_transcript_variant	0	0	131500233	676	upstream	intronic	ADARB1	0.215859	15	61	0.245902	8	62	0.129032	26	104	0.25	0	0	37	0	0	85	0	0	25	0	0	0	69	0	0	66	0	0	52	0
chr1	131499574	-	T	chr1:131499574	Gm24273,Srgap2	SINE	Intron	non_coding_transcript_variant	0	0	131498141	1433	downstream	intronic	ADARB1	0.0433071	2	60	0.0333333	2	73	0.0273973	7	121	0.0578512	0	0	44	0	0	94	0	0	95	0	0	0	67	0	0	61	0	0	56	0
chr1	131500450	-	T	chr1:131500450	Gm24273,Srgap2	SINE	Intron	non_coding_transcript_variant	0	0	-	-	-	-	ADARB1	0.0248963	0	75	0	1	52	0.0192308	5	114	0.0438596	0	0	26	0	0	34	0	0	80	0	0	0	43	0	0	48	0	0	35	0
chr1	131500452	-	T	chr1:131500452	Gm24273,Srgap2	SINE	Intron	non_coding_transcript_variant	0	0	-	-	-	-	ADARB1	0.144033	8	79	0.101266	13	51	0.254902	14	113	0.123894	0	0	27	0	0	38	0	0	88	0	0	0	43	0	0	46	0	0	34	0
chr1	131500457	-	T	chr1:131500457	Gm24273,Srgap2	SINE	Intron	non_coding_transcript_variant	0	0	-	-	-	-	ADARB1	0.245968	15	86	0.174419	18	50	0.36	28	112	0.25	0	0	27	0	0	37	0	0	56	0	0	0	49	0	0	46	0	0	33	0
chr1	131912878	+	A	chr1:131912878	Gm29105,Gm38067,Nucks1	SINE	Intron	intron_variant	0	0	-	-	-	-	ADARB1	0.102564	2	11	0.181818	0	6	0	2	22	0.0909091	0	0	33	0	0	15	0	0	71	0	0	0	8	0	0	12	0	0	16	0
chr1	131919955	+	A	chr1:131919955	Gm38067,Nucks1	SINE	Intron	intron_variant	0	0	-	-	-	-	ADAR	0.108696	0	8	0	4	22	0.181818	1	16	0.0625	0	0	31	0	0	16	0	0	68	0	0.291667	4	10	0.4	2	5	0.4	1	9	0.111111
chr1	131919956	+	A	chr1:131919956	Gm38067,Nucks1	SINE	Intron	intron_variant	0	0	-	-	-	-	ADAR	0.113636	0	8	0	4	22	0.181818	1	14	0.0714286	0	0	31	0	0	14	0	0	70	0	0.333333	4	10	0.4	3	5	0.6	1	9	0.111111
chr1	131920866	+	A	chr1:131920866	Gm38067,Nucks1	SINE	Intron	intron_variant	0	0	-	-	-	-	ADARB1	0.0784314	0	19	0	2	12	0.166667	2	20	0.1	0	0	29	0	0	27	0	0	53	0	0	0	11	0	0	4	0	0	10	0
chr1	131921552	+	A	chr1:131921552	Nucks1	SINE	Intron	intron_variant	0	0	-	-	-	-	ADAR	0.0909091	1	14	0.0714286	0	12	0	3	18	0.166667	0	0	16	0	0	18	0	0	55	0	0.0526316	0	4	0	0	6	0	1	9	0.111111
chr1	131940492	+	A	chr1:131940492	Nucks1	SINE	intergenic	regulatory_region_variant	0	0	-	-	-	-	ADARB1	0.222222	3	12	0.25	1	10	0.1	2	5	0.4	0	0	8	0	0	8	0	0	56	0	0	0	5	0	0	2	0	0	1	0
chr1	131940507	+	A	chr1:131940507	Nucks1	SINE	intergenic	regulatory_region_variant	0	0	-	-	-	-	ADARB1	0.178571	3	13	0.230769	1	10	0.1	1	5	0.2	0	0	6	0	0	7	0	0	52	0	0	0	6	0	0	2	0	0	1	0
chr1	131940511	+	A	chr1:131940511	Nucks1	SINE	intergenic	regulatory_region_variant	0	0	-	-	-	-	ADARB1	0.178571	2	13	0.153846	0	10	0	3	5	0.6	0	0	6	0	0	7	0	0	33	0	0	0	6	0	0	2	0	0	1	0
chr1	131940526	+	A	chr1:131940526	Nucks1	SINE	intergenic	regulatory_region_variant	0	0	131940215	311	upstream	undefined	ADAR	0.580645	8	14	0.571429	7	12	0.583333	3	5	0.6	0	0	6	0	0	8	0	0	33	0	0.2	1	6	0.166667	1	3	0.333333	0	1	0
chr1	131940543	+	A	chr1:131940543	Nucks1	SINE	intergenic	regulatory_region_variant	0	0	131940197	346	upstream	undefined	ADARB1	0.117647	2	13	0.153846	1	14	0.0714286	1	7	0.142857	0	0	11	0	0	11	0	0	31	0	0	0	7	0	0	2	0	0	1	0
chr1	131940555	+	A	chr1:131940555	Nucks1	SINE	intergenic	regulatory_region_variant	0	0	131940182	373	upstream	undefined	ADARB1	0.242424	3	12	0.25	3	13	0.230769	2	8	0.25	0	0	12	0	0	13	0	0	16	0	0	0	7	0	0	2	0	0	1	0
chr1	13197559	-	T	chr1:13197559	Ncoa2	LTR	Intron	non_coding_transcript_variant	0	0	-	-	-	-	ADARB1	0.0466321	1	47	0.0212766	2	75	0.0266667	6	71	0.084507	0	0	121	0	0	81	0	0	66	0	0	0	25	0	0	28	0	0	23	0
chr1	13197650	-	T	chr1:13197650	Ncoa2	LTR	Intron	non_coding_transcript_variant	0	0	13197021	629	downstream	Intron	ADARB1	0.0656934	1	28	0.0357143	5	53	0.0943396	3	56	0.0535714	0	0	92	0	0	63	0	0	57	0	0	0	14	0	0	16	0	0	15	0
chr1	13197859	-	T	chr1:13197859	Ncoa2	LTR	Intron	non_coding_transcript_variant	0	0	13198076	217	upstream	intronic	ADAR	0.0909091	0	20	0	5	64	0.078125	8	59	0.135593	0	0	48	0	0	32	0	0	24	0	0.0447761	2	23	0.0869565	1	26	0.0384615	0	18	0
chr1	13198229	-	T	chr1:13198229	Ncoa2	LTR	Intron	non_coding_transcript_variant	0	0	13198768	539	upstream	Intron	ADAR	0.0697674	2	55	0.0363636	1	50	0.02	9	67	0.134328	0	0	77	0	0	48	0	0	54	0	0.131148	3	20	0.15	2	25	0.08	3	16	0.1875
chr1	13198317	-	T	chr1:13198317	Ncoa2	LTR	Intron	non_coding_transcript_variant	0	0	-	-	-	-	ADAR	0.0469484	4	68	0.0588235	3	66	0.0454545	3	79	0.0379747	0	0	84	0	0	51	0	0	68	0	0.0319149	3	28	0.107143	0	29	0	0	37	0
chr1	13198447	-	T	chr1:13198447	Ncoa2	LTR	Intron	non_coding_transcript_variant	0	0	-	-	-	-	ADAR	0.0333333	3	53	0.0566038	1	57	0.0175439	2	70	0.0285714	0	0	66	0	0	59	0	0	47	0	0.0206186	0	42	0	1	23	0.0434783	1	32	0.03125
chr1	132025701	-	T	chr1:132025701	Elk4,Mfsd4a	SINE	UTR	3_prime_UTR_variant	1	1	-	-	-	-	ADAR	0.160428	9	59	0.152542	7	57	0.122807	14	71	0.197183	0	0	111	0	0	60	0	0	43	0	0.0405405	0	20	0	3	36	0.0833333	0	18	0
chr1	132025706	-	T	chr1:132025706	Elk4,Mfsd4a	SINE	UTR	3_prime_UTR_variant	1	1	-	-	-	-	ADARB1	0.026455	0	57	0	1	60	0.0166667	4	72	0.0555556	0	0	117	0	0	62	0	0	43	0	0	0	21	0	0	36	0	0	17	0
chr1	132038244	-	T	chr1:132038244	Gm26892,Mfsd4a	SINE	UTR	3_prime_UTR_variant	0	0	132036258	1986	downstream	intronic	ADARB1	0.0833333	1	7	0.142857	1	10	0.1	0	7	0	0	0	5	0	0	9	0	0	22	0	0	0	10	0	0	17	0	0	4	0
chr1	132039762	-	T	chr1:132039762	Gm26892,Mfsd4a	SINE	Intron	regulatory_region_variant	0	0	-	-	-	-	ADARB1	0.0576923	3	33	0.0909091	2	33	0.0606061	1	38	0.0263158	0	0	20	0	0	15	0	0	20	0	0	0	15	0	0	10	0	0	10	0
chr1	132048795	-	T	chr1:132048795	Gm26892,Mfsd4a	SINE	Intron	non_coding_transcript_variant	0	0	-	-	-	-	ADARB1	0.0555556	1	18	0.0555556	1	23	0.0434783	2	31	0.0645161	0	0	6	0	0	15	0	0	10	0	0	0	24	0	0	15	0	0	16	0
chr1	132048799	-	T	chr1:132048799	Gm26892,Mfsd4a	SINE	Intron	non_coding_transcript_variant	0	0	-	-	-	-	ADARB1	0.178082	5	20	0.25	4	24	0.166667	4	29	0.137931	0	0	6	0	0	16	0	0	11	0	0	0	23	0	0	15	0	0	15	0
chr1	132063078	-	T	chr1:132063078	Gm26892,Mfsd4a	.	Intron	non_coding_transcript_variant	0	0	132064278	1200	upstream	intronic	ADAR	0.0686275	2	25	0.08	3	36	0.0833333	2	41	0.0487805	0	0	13	0	0	22	0	0	11	0	0.0192308	1	23	0.0434783	0	11	0	0	18	0
chr1	132063090	-	T	chr1:132063090	Gm26892,Mfsd4a	.	Intron	non_coding_transcript_variant	0	0	132064266	1176	upstream	intronic	ADAR	0.0744681	2	24	0.0833333	2	34	0.0588235	3	36	0.0833333	0	0	12	0	0	15	0	0	14	0	0.02	1	23	0.0434783	0	10	0	0	17	0
chr1	132064211	-	T	chr1:132064211	Gm26892,Mfsd4a	.	Intron	non_coding_transcript_variant	0	0	132063145	1066	downstream	intronic	ADARB1	0.0379747	1	23	0.0434783	1	24	0.0416667	1	32	0.03125	0	0	11	0	0	15	0	0	16	0	0	0	17	0	0	10	0	0	8	0
chr1	132064218	-	T	chr1:132064218	Gm26892,Mfsd4a	.	Intron	non_coding_transcript_variant	0	0	132063138	1080	downstream	intronic	ADARB1	0.0843373	2	24	0.0833333	2	24	0.0833333	3	35	0.0857143	0	0	11	0	0	14	0	0	19	0	0	0	17	0	0	8	0	0	8	0
chr1	132064223	-	T	chr1:132064223	Gm26892,Mfsd4a	.	Intron	non_coding_transcript_variant	0	0	132063133	1090	downstream	intronic	ADARB1	0.135802	3	23	0.130435	3	24	0.125	5	34	0.147059	0	0	11	0	0	18	0	0	77	0	0	0	17	0	0	8	0	0	7	0
chr1	132064229	-	T	chr1:132064229	Gm26892,Mfsd4a	.	Intron	non_coding_transcript_variant	0	0	132063127	1102	downstream	intronic	ADAR	0.148936	3	24	0.125	5	26	0.192308	6	44	0.136364	0	0	13	0	0	19	0	0	73	0	0.0333333	1	15	0.0666667	0	7	0	0	8	0
chr1	132064233	-	T	chr1:132064233	Gm26892,Mfsd4a	.	Intron	non_coding_transcript_variant	0	0	132063123	1110	downstream	intronic	ADAR	0.0515464	2	26	0.0769231	0	25	0	3	46	0.0652174	0	0	13	0	0	16	0	0	75	0	0.0333333	1	15	0.0666667	0	7	0	0	8	0
chr1	132064257	-	T	chr1:132064257	Gm26892,Mfsd4a	.	Intron	non_coding_transcript_variant	0	0	132063099	1158	downstream	intronic	ADARB1	0.117021	3	22	0.136364	2	24	0.0833333	6	48	0.125	0	0	10	0	0	16	0	0	16	0	0	0	19	0	0	7	0	0	8	0
chr1	132202368	+	A	chr1:132202368	1700037F24Rik,Lemd1,Mir135b	.	Intron	non_coding_transcript_variant	0	0	-	-	-	-	ADAR	0.0348837	2	41	0.0487805	2	64	0.03125	2	67	0.0298507	0	0	15	0	0	29	0	0	19	0	0.02	0	17	0	1	21	0.047619	0	12	0
chr1	13222990	-	T	chr1:13222990	Ncoa2	LTR	Intron	regulatory_region_variant	0	0	-	-	-	-	ADARB1	0.458333	2	6	0.333333	5	10	0.5	4	8	0.5	0	0	16	0	0	18	0	0	13	0	0	0	8	0	0	7	0	0	8	0
chr1	13223006	-	T	chr1:13223006	Ncoa2	LTR	Intron	non_coding_transcript_variant	0	0	13223150	144	upstream	intronic	ADAR	0.346154	2	7	0.285714	2	9	0.222222	5	10	0.5	0	0	16	0	0	14	0	0	13	0	0.227273	3	6	0.5	0	8	0	2	8	0.25
chr1	13223007	-	T	chr1:13223007	Ncoa2	LTR	Intron	non_coding_transcript_variant	0	0	13223148	141	upstream	intronic	ADAR	0.357143	1	8	0.125	2	10	0.2	7	10	0.7	0	0	16	0	0	16	0	0	14	0	0.434783	4	6	0.666667	2	8	0.25	4	9	0.444444
chr1	13223212	-	T	chr1:13223212	Ncoa2	SINE	Intron	non_coding_transcript_variant	0	0	13222944	268	downstream	intronic	ADARB1	0.16129	1	8	0.125	4	9	0.444444	0	14	0	0	0	36	0	0	29	0	0	39	0	0	0	4	0	0	15	0	0	6	0
chr1	13223221	-	T	chr1:13223221	Ncoa2	SINE	Intron	non_coding_transcript_variant	0	0	13222935	286	downstream	intronic	ADAR	0.151515	3	8	0.375	2	10	0.2	0	15	0	0	0	36	0	0	28	0	0	38	0	0.384615	2	4	0.5	8	16	0.5	0	6	0
chr1	132424941	+	A	chr1:132424941	Dstyk	SINE	Intron	non_coding_transcript_variant	0	0	-	-	-	-	ADARB1	0.047619	1	37	0.027027	2	43	0.0465116	3	46	0.0652174	0	0	51	0	0	50	0	0	18	0	0	0	18	0	0	15	0	0	16	0
chr1	132424951	+	A	chr1:132424951	Dstyk	SINE	Intron	non_coding_transcript_variant	0	0	132426885	1934	downstream	intronic	ADAR	0.294118	15	47	0.319149	13	45	0.288889	12	44	0.272727	0	0	53	0	0	51	0	0	17	0	0.229508	6	24	0.25	3	20	0.15	5	17	0.294118
chr1	132426859	+	A	chr1:132426859	Dstyk	SINE	Intron	non_coding_transcript_variant	0	0	132424975	1884	upstream	intronic	ADARB1	0.159574	5	26	0.192308	3	25	0.12	7	43	0.162791	0	0	59	0	0	37	0	0	24	0	0	0	9	0	0	9	0	0	10	0
chr1	132426878	+	A	chr1:132426878	Dstyk	SINE	Intron	non_coding_transcript_variant	0	0	132424956	1922	upstream	intronic	ADARB1	0.049505	0	31	0	3	28	0.107143	2	42	0.047619	0	0	65	0	0	33	0	0	25	0	0	0	9	0	0	10	0	0	11	0
chr1	132429676	+	A	chr1:132429676	Dstyk	SINE	Intron	non_coding_transcript_variant	0	0	-	-	-	-	ADAR	0.0925926	3	14	0.214286	0	15	0	2	25	0.08	0	0	28	0	0	29	0	0	22	0	0.030303	0	3	0	0	18	0	1	12	0.0833333
chr1	132430156	+	A	chr1:132430156	Dstyk	SINE	Intron	regulatory_region_variant	0	0	132431463	1307	downstream	intronic	ADAR	0.0757576	3	29	0.103448	2	25	0.08	0	12	0	0	0	33	0	0	21	0	0	27	0	0.0196078	0	22	0	1	12	0.0833333	0	17	0
chr1	132431473	+	A	chr1:132431473	Dstyk	SINE	Intron	regulatory_region_variant	0	0	132430146	1327	upstream	intronic	ADARB1	0.128205	2	10	0.2	1	10	0.1	2	19	0.105263	0	0	19	0	0	30	0	0	27	0	0	0	6	0	0	7	0	0	5	0
chr1	132431483	+	A	chr1:132431483	Dstyk	SINE	Intron	regulatory_region_variant	0	0	132430136	1347	upstream	intronic	ADARB1	0.111111	2	11	0.181818	0	9	0	2	16	0.125	0	0	17	0	0	33	0	0	29	0	0	0	6	0	0	6	0	0	6	0
chr1	132438321	+	A	chr1:132438321	Dstyk	LTR	Intron	intron_variant	0	0	132439652	1331	downstream	intronic	ADAR	0.245283	6	22	0.272727	3	10	0.3	4	21	0.190476	0	0	40	0	0	20	0	0	29	0	0.107143	0	13	0	3	24	0.125	3	19	0.157895
chr1	132438374	+	A	chr1:132438374	Dstyk	LTR	Intron	intron_variant	0	0	-	-	-	-	ADAR	0.0684932	2	26	0.0769231	2	12	0.166667	1	35	0.0285714	0	0	51	0	0	32	0	0	29	0	0.0192308	0	11	0	1	24	0.0416667	0	17	0
chr1	132438412	+	A	chr1:132438412	Dstyk	LTR	Intron	intron_variant	0	0	132439563	1151	downstream	intronic	ADAR	0.317647	5	30	0.166667	3	19	0.157895	19	36	0.527778	0	0	69	0	0	43	0	0	32	0	0.333333	4	12	0.333333	9	17	0.529412	2	16	0.125
chr1	132440839	+	A	chr1:132440839	Dstyk	SINE	Intron	intron_variant	0	0	132439120	1719	upstream	intronic	ADAR	0.136364	3	37	0.0810811	0	16	0	9	35	0.257143	0	0	77	0	0	46	0	0	55	0	0.125	2	15	0.133333	2	16	0.125	1	9	0.111111
chr1	132442393	+	A	chr1:132442393	Dstyk	LTR	Intron	intron_variant	0	0	-	-	-	-	ADARB1	0.0479042	3	51	0.0588235	3	42	0.0714286	2	74	0.027027	0	0	104	0	0	85	0	0	60	0	0	0	21	0	0	17	0	0	11	0
chr1	132442399	+	A	chr1:132442399	Dstyk	LTR	Intron	intron_variant	0	0	-	-	-	-	ADAR	0.077381	4	53	0.0754717	3	44	0.0681818	6	71	0.084507	0	0	101	0	0	85	0	0	50	0	0.0869565	4	20	0.2	0	16	0	0	10	0
chr1	132442410	+	A	chr1:132442410	Dstyk	LTR	Intron	intron_variant	0	0	-	-	-	-	ADAR	0.0880503	6	48	0.125	3	43	0.0697674	5	68	0.0735294	0	0	99	0	0	78	0	0	51	0	0.0217391	1	22	0.0454545	0	12	0	0	12	0
chr1	132442413	+	A	chr1:132442413	Dstyk	LTR	Intron	intron_variant	0	0	-	-	-	-	ADARB1	0.0727273	6	51	0.117647	1	44	0.0227273	5	70	0.0714286	0	0	97	0	0	80	0	0	18	0	0	0	22	0	0	13	0	0	12	0
chr1	132444421	+	A	chr1:132444421	Dstyk	SINE	Intron	intron_variant	0	0	132444780	359	downstream	Intron	ADAR	0.451613	6	14	0.428571	5	9	0.555556	3	8	0.375	0	0	19	0	0	17	0	0	29	0	0.428571	3	8	0.375	5	6	0.833333	1	7	0.142857
chr1	132444422	+	A	chr1:132444422	Dstyk	SINE	Intron	intron_variant	0	0	-	-	-	-	ADARB1	0.133333	2	14	0.142857	0	9	0	2	7	0.285714	0	0	19	0	0	16	0	0	10	0	0	0	8	0	0	6	0	0	7	0
chr1	132444480	-	T	chr1:132444480	Dstyk	SINE	Intron	intron_variant	0	0	132444719	239	upstream	intronic	ADARB1	0.15	0	4	0	2	9	0.222222	1	7	0.142857	0	0	12	0	0	3	0	0	11	0	0	0	4	0	0	3	0	0	5	0
chr1	132444484	+	A	chr1:132444484	Dstyk	SINE	Intron	intron_variant	0	0	132444717	233	downstream	intronic	ADARB1	0.25	1	4	0.25	2	8	0.25	2	8	0.25	0	0	11	0	0	3	0	0	27	0	0	0	4	0	0	4	0	0	6	0
chr1	132444711	+	A	chr1:132444711	Dstyk	SINE	Intron	intron_variant	0	0	132444487	224	upstream	intronic	ADAR	0.428571	1	5	0.2	6	14	0.428571	5	9	0.555556	0	0	5	0	0	4	0	0	32	0	0.222222	1	2	0.5	0	1	0	1	6	0.166667
chr1	132444722	+	A	chr1:132444722	Dstyk	SINE	Intron	intron_variant	0	0	132444478	244	upstream	intronic	ADARB1	0.25	2	5	0.4	5	20	0.25	2	11	0.181818	0	0	8	0	0	5	0	0	32	0	0	0	2	0	0	1	0	0	8	0
chr1	132453929	-	T	chr1:132453929	Dstyk	SINE	Intron	intron_variant	0	0	132454873	944	upstream	intronic	ADARB1	0.0410959	2	30	0.0666667	0	57	0	4	59	0.0677966	0	0	37	0	0	58	0	0	41	0	0	0	13	0	0	15	0	0	23	0
chr1	132453933	-	T	chr1:132453933	Dstyk	SINE	Intron	intron_variant	0	0	132454870	937	upstream	intronic	ADARB1	0.0324675	2	36	0.0555556	0	59	0	3	59	0.0508475	0	0	39	0	0	56	0	0	58	0	0	0	13	0	0	16	0	0	23	0
chr1	132453937	-	T	chr1:132453937	Dstyk	SINE	Intron	intron_variant	0	0	132454864	927	upstream	intronic	ADARB1	0.0432099	2	39	0.0512821	0	59	0	5	64	0.078125	0	0	39	0	0	56	0	0	57	0	0	0	13	0	0	16	0	0	23	0
chr1	132471917	-	T	chr1:132471917	6030442K20Rik,Dstyk	SINE	Intron	non_coding_transcript_variant	0	0	132473034	1117	upstream	intronic	ADARB1	0.238095	2	11	0.181818	1	4	0.25	2	6	0.333333	0	0	3	0	0	3	0	0	58	0	0	0	0	NA	0	1	0	0	1	0
chr1	132473494	-	T	chr1:132473494	6030442K20Rik,Rbbp5	SINE	Intron	non_coding_transcript_variant	0	0	132473034	460	downstream	intronic	ADARB1	0.3	3	5	0.6	1	10	0.1	2	5	0.4	0	0	3	0	0	6	0	0	58	0	0	0	4	0	0	6	0	0	6	0
chr1	132478579	+	A	chr1:132478579	6030442K20Rik,Rbbp5	SINE	Intron	regulatory_region_variant	0	0	-	-	-	-	ADARB1	0.0526316	0	20	0	1	18	0.0555556	2	19	0.105263	0	0	10	0	0	14	0	0	16	0	0	0	10	0	0	7	0	0	17	0
chr1	13248202	-	T	chr1:13248202	Ncoa2	.	Intron	non_coding_transcript_variant	0	0	13247085	1117	downstream	intronic	ADARB1	0.0555556	0	26	0	1	41	0.0243902	5	41	0.121951	0	0	64	0	0	29	0	0	35	0	0	0	27	0	0	20	0	0	23	0
chr1	13248238	-	T	chr1:13248238	Ncoa2	.	Intron	non_coding_transcript_variant	0	0	13247049	1189	downstream	intronic	ADARB1	0.0526316	2	27	0.0740741	1	34	0.0294118	2	34	0.0588235	0	0	68	0	0	37	0	0	32	0	0	0	27	0	0	17	0	0	21	0
chr1	13248251	-	T	chr1:13248251	Ncoa2	.	Intron	non_coding_transcript_variant	0	0	13247036	1215	downstream	intronic	ADARB1	0.0425532	2	25	0.08	1	33	0.030303	1	36	0.0277778	0	0	76	0	0	44	0	0	37	0	0	0	27	0	0	20	0	0	18	0
chr1	13248252	-	T	chr1:13248252	Ncoa2	.	Intron	non_coding_transcript_variant	0	0	13247035	1217	downstream	intronic	ADARB1	0.0434783	2	25	0.08	1	33	0.030303	1	34	0.0294118	0	0	73	0	0	42	0	0	37	0	0	0	27	0	0	20	0	0	18	0
chr1	13248284	-	T	chr1:13248284	Ncoa2	.	Intron	non_coding_transcript_variant	0	0	13247003	1281	downstream	intronic	ADARB1	0.0833333	2	25	0.08	4	29	0.137931	1	30	0.0333333	0	0	57	0	0	39	0	0	24	0	0	0	27	0	0	20	0	0	16	0
chr1	132524231	-	T	chr1:132524231	Cntn2	SINE	Intron	regulatory_region_variant	0	0	-	-	-	-	ADARB1	0.0159453	4	146	0.0273973	2	145	0.0137931	1	148	0.00675676	0	0	80	0	0	123	0	0	16	0	0	0	78	0	0	82	0	0	77	0
chr1	132571065	-	T	chr1:132571065	Nfasc	.	Intron	intron_variant	0	0	132572232	1167	upstream	intronic	ADARB1	0.032345	4	104	0.0384615	4	120	0.0333333	4	147	0.0272109	0	0	143	0	0	137	0	0	12	0	0	0	28	0	0	31	0	0	22	0
chr1	132571141	-	T	chr1:132571141	Nfasc	.	Intron	intron_variant	1	1	132572161	1020	upstream	intronic	ADAR	0.0615385	6	126	0.047619	7	114	0.0614035	11	150	0.0733333	0	0	154	0	0	166	0	0	13	0	0.113402	5	28	0.178571	5	43	0.116279	1	26	0.0384615
chr1	132571146	-	T	chr1:132571146	Nfasc	.	Intron	intron_variant	1	1	132572158	1012	upstream	intronic	ADAR	0.0460358	8	131	0.0610687	5	110	0.0454545	5	150	0.0333333	0	0	155	0	0	169	0	0	3	0	0.0102041	0	28	0	1	43	0.0232558	0	27	0
chr1	132571167	-	T	chr1:132571167	Nfasc	.	Intron	intron_variant	1	1	-	-	-	-	ADAR	0.202073	28	128	0.21875	22	114	0.192982	28	144	0.194444	0	0	150	0	0	165	0	0	7	0	0.346535	13	32	0.40625	16	43	0.372093	6	26	0.230769
chr1	132572171	-	T	chr1:132572171	Nfasc	.	Intron	intron_variant	0	0	132571132	1039	downstream	intronic	ADAR	0.333333	63	183	0.344262	58	150	0.386667	62	216	0.287037	0	0	187	0	0	170	0	0	32	0	0.0616438	2	59	0.0338983	4	38	0.105263	3	49	0.0612245
chr1	132572177	-	T	chr1:132572177	Nfasc	.	Intron	intron_variant	0	0	132571127	1050	downstream	intronic	ADAR	0.118584	28	192	0.145833	22	151	0.145695	17	222	0.0765766	0	0	186	0	0	168	0	0	31	0	0.0723684	5	60	0.0833333	4	44	0.0909091	2	48	0.0416667
chr1	132663182	-	T	chr1:132663182	Nfasc	LTR	Intron	intron_variant	0	0	-	-	-	-	ADARB1	0.101896	11	129	0.0852713	20	133	0.150376	12	160	0.075	0	0	115	0	0	106	0	0	33	0	0	0	57	0	0	68	0	0	72	0
chr1	132716532	-	T	chr1:132716532	Nfasc	LTR	Intron	non_coding_transcript_variant	0	0	-	-	-	-	ADAR	0.125714	8	71	0.112676	11	43	0.255814	3	61	0.0491803	0	0	73	0	0	40	0	0	6	0	0.015873	0	17	0	0	15	0	1	31	0.0322581
chr1	132716771	-	T	chr1:132716771	Nfasc	LTR	Intron	non_coding_transcript_variant	0	0	-	-	-	-	ADARB1	0.126437	4	62	0.0645161	12	57	0.210526	6	55	0.109091	0	0	62	0	0	38	0	0	8	0	0	0	28	0	0	33	0	0	36	0
chr1	132719889	-	T	chr1:132719889	Nfasc	LTR	Intron	non_coding_transcript_variant	0	0	-	-	-	-	ADARB1	0.024911	1	98	0.0102041	3	86	0.0348837	3	97	0.0309278	0	0	131	0	0	80	0	0	13	0	0	0	54	0	0	53	0	0	49	0
chr1	132719947	-	T	chr1:132719947	Nfasc	LTR	Intron	non_coding_transcript_variant	0	0	-	-	-	-	ADARB1	0.0697674	3	95	0.0315789	9	72	0.125	6	91	0.0659341	0	0	156	0	0	64	0	0	116	0	0	0	57	0	0	47	0	0	31	0
chr1	132719975	-	T	chr1:132719975	Nfasc	LTR	Intron	non_coding_transcript_variant	0	0	-	-	-	-	ADAR	0.176707	12	85	0.141176	16	75	0.213333	16	89	0.179775	0	0	147	0	0	59	0	0	125	0	0.104348	7	50	0.14	3	39	0.0769231	2	26	0.0769231
chr1	132719987	-	T	chr1:132719987	Nfasc	LTR	Intron	non_coding_transcript_variant	0	0	-	-	-	-	ADARB1	0.136564	7	82	0.0853659	11	60	0.183333	13	85	0.152941	0	0	123	0	0	57	0	0	175	0	0	0	52	0	0	43	0	0	33	0
chr1	132720022	-	T	chr1:132720022	Nfasc	LTR	Intron	non_coding_transcript_variant	0	0	-	-	-	-	ADAR	0.114894	6	83	0.0722892	8	68	0.117647	13	84	0.154762	0	0	103	0	0	52	0	0	175	0	0.0536913	2	60	0.0333333	5	50	0.1	1	39	0.025641
chr1	132720024	-	T	chr1:132720024	Nfasc	LTR	Intron	non_coding_transcript_variant	0	0	-	-	-	-	ADARB1	0.06639	5	86	0.0581395	6	68	0.0882353	5	87	0.0574713	0	0	104	0	0	52	0	0	168	0	0	0	61	0	0	52	0	0	39	0
chr1	132720025	-	T	chr1:132720025	Nfasc	LTR	Intron	non_coding_transcript_variant	0	0	-	-	-	-	ADAR	0.123967	13	87	0.149425	6	69	0.0869565	11	86	0.127907	0	0	104	0	0	52	0	0	186	0	0.0872483	7	61	0.114754	3	50	0.06	3	38	0.0789474
chr1	132720028	-	T	chr1:132720028	Nfasc	LTR	Intron	non_coding_transcript_variant	0	0	-	-	-	-	ADAR	0.0696721	9	89	0.101124	5	69	0.0724638	3	86	0.0348837	0	0	103	0	0	53	0	0	185	0	0.00704225	0	57	0	0	47	0	1	38	0.0263158
chr1	132720048	-	T	chr1:132720048	Nfasc	LTR	Intron	non_coding_transcript_variant	0	0	-	-	-	-	ADAR	0.148305	13	89	0.146067	9	60	0.15	13	87	0.149425	0	0	88	0	0	53	0	0	153	0	0.00806452	1	44	0.0227273	0	42	0	0	38	0
chr1	132720142	-	T	chr1:132720142	Nfasc	LTR	Intron	non_coding_transcript_variant	0	0	-	-	-	-	ADAR	0.105263	12	108	0.111111	8	78	0.102564	10	99	0.10101	0	0	74	0	0	72	0	0	63	0	0.170213	8	47	0.170213	5	48	0.104167	11	46	0.23913
chr1	132720181	-	T	chr1:132720181	Nfasc	LTR	Intron	non_coding_transcript_variant	0	0	-	-	-	-	ADAR	0.0147929	2	132	0.0151515	3	96	0.03125	0	110	0	0	0	87	0	0	93	0	0	39	0	0.0233918	0	69	0	1	52	0.0192308	3	50	0.06
chr1	132720189	-	T	chr1:132720189	Nfasc	LTR	Intron	non_coding_transcript_variant	0	0	-	-	-	-	ADAR	0.026393	6	134	0.0447761	1	94	0.0106383	2	113	0.0176991	0	0	88	0	0	87	0	0	101	0	0.0116959	2	67	0.0298507	0	55	0	0	49	0
chr1	132720202	-	T	chr1:132720202	Nfasc	LTR	Intron	non_coding_transcript_variant	0	0	132719954	248	downstream	intronic	ADAR	0.0331325	4	128	0.03125	7	93	0.0752688	0	111	0	0	0	95	0	0	96	0	0	80	0	0.00606061	1	66	0.0151515	0	53	0	0	46	0
chr1	132895560	+	A	chr1:132895560	Lrrn2	SINE	Intron	non_coding_transcript_variant	0	0	-	-	-	-	ADARB1	0.0271493	2	56	0.0357143	3	77	0.038961	1	88	0.0113636	0	0	66	0	0	60	0	0	67	0	0	0	28	0	0	34	0	0	25	0
chr1	132895653	+	A	chr1:132895653	Lrrn2	SINE	Intron	non_coding_transcript_variant	1	1	-	-	-	-	ADARB1	0.112069	9	78	0.115385	6	84	0.0714286	11	70	0.157143	0	0	63	0	0	69	0	0	66	0	0	0	47	0	0	27	0	0	42	0
chr1	132895662	+	A	chr1:132895662	Lrrn2	SINE	Intron	non_coding_transcript_variant	0	0	-	-	-	-	ADAR	0.037037	3	76	0.0394737	3	93	0.0322581	3	74	0.0405405	0	0	81	0	0	74	0	0	59	0	0.016129	2	48	0.0416667	0	26	0	0	50	0
chr1	132895663	+	A	chr1:132895663	Lrrn2	SINE	Intron	non_coding_transcript_variant	1	1	-	-	-	-	ADAR	0.119342	11	76	0.144737	7	94	0.0744681	11	73	0.150685	0	0	82	0	0	74	0	0	59	0	0.008	0	48	0	1	28	0.0357143	0	49	0
chr1	132896201	+	A	chr1:132896201	Lrrn2	SINE	Intron	non_coding_transcript_variant	0	0	-	-	-	-	ADAR	0.430147	48	99	0.484848	31	89	0.348315	38	84	0.452381	0	0	83	0	0	88	0	0	59	0	0.198413	8	42	0.190476	9	41	0.219512	8	43	0.186047
chr1	132896202	+	A	chr1:132896202	Lrrn2	SINE	Intron	non_coding_transcript_variant	0	0	-	-	-	-	ADAR	0.166667	15	101	0.148515	14	90	0.155556	17	85	0.2	0	0	85	0	0	87	0	0	58	0	0.165354	8	42	0.190476	5	42	0.119048	8	43	0.186047
chr1	132896204	+	A	chr1:132896204	Lrrn2	SINE	Intron	non_coding_transcript_variant	0	0	-	-	-	-	ADAR	0.165468	14	99	0.141414	14	90	0.155556	18	89	0.202247	0	0	86	0	0	88	0	0	64	0	0.0687023	1	42	0.0238095	5	43	0.116279	3	46	0.0652174
chr1	132896207	+	A	chr1:132896207	Lrrn2	SINE	Intron	non_coding_transcript_variant	0	0	-	-	-	-	ADAR	0.202055	22	103	0.213592	11	95	0.115789	26	94	0.276596	0	0	89	0	0	93	0	0	77	0	0.0846154	1	42	0.0238095	5	43	0.116279	5	45	0.111111
chr1	132896335	+	A	chr1:132896335	Lrrn2	SINE	Intron	non_coding_transcript_variant	0	0	-	-	-	-	ADARB1	0.0467836	3	56	0.0535714	2	47	0.0425532	3	68	0.0441176	0	0	59	0	0	30	0	0	92	0	0	0	41	0	0	34	0	0	29	0
chr1	132923770	+	A	chr1:132923770	Gm44300,Lrrn2	SINE	Intron	non_coding_transcript_variant	1	1	132924080	310	downstream	intronic	ADAR	0.192857	19	82	0.231707	13	88	0.147727	22	110	0.2	0	0	55	0	0	54	0	0	88	0	0.097561	2	29	0.0689655	2	14	0.142857	4	39	0.102564
chr1	132923803	+	A	chr1:132923803	Gm44300,Lrrn2	SINE	Intron	non_coding_transcript_variant	0	0	132926262	2459	downstream	intronic	ADARB1	0.0340426	1	70	0.0142857	2	78	0.025641	5	87	0.0574713	0	0	50	0	0	47	0	0	92	0	0	0	33	0	0	13	0	0	40	0
chr1	132925988	+	A	chr1:132925988	Gm44300,Lrrn2	SINE	Intron	non_coding_transcript_variant	0	0	-	-	-	-	ADAR	0.0357143	1	41	0.0243902	0	43	0	4	56	0.0714286	0	0	61	0	0	30	0	0	68	0	0.00813008	0	53	0	1	37	0.027027	0	33	0
chr1	132925998	+	A	chr1:132925998	Gm44300,Lrrn2	SINE	Intron	non_coding_transcript_variant	0	0	-	-	-	-	ADARB1	0.0534351	1	38	0.0263158	0	40	0	6	53	0.113208	0	0	55	0	0	29	0	0	65	0	0	0	54	0	0	41	0	0	32	0
chr1	132926170	+	A	chr1:132926170	Gm44300,Lrrn2	SINE	Intron	non_coding_transcript_variant	0	0	132924128	2042	upstream	intronic	ADAR	0.0833333	2	17	0.117647	1	4	0.25	0	15	0	0	0	13	0	0	4	0	0	71	0	0.0882353	1	21	0.047619	3	30	0.1	2	17	0.117647
chr1	132929727	+	A	chr1:132929727	Lrrn2	SINE	Intron	non_coding_transcript_variant	0	0	-	-	-	-	ADARB1	0.0641026	0	27	0	2	19	0.105263	3	32	0.09375	0	0	10	0	0	21	0	0	73	0	0	0	22	0	0	21	0	0	22	0
chr1	132953778	-	T	chr1:132953778	-	SINE	intergenic	intergenic_variant	0	0	-	-	-	-	ADARB1	0.166667	1	6	0.166667	0	6	0	2	6	0.333333	0	0	27	0	0	19	0	0	73	0	0	0	5	0	0	2	0	0	0	NA
chr1	132960720	-	T	chr1:132960720	Mdm4	SINE	UTR	3_prime_UTR_variant	0	0	-	-	-	-	ADAR	0.190476	2	7	0.285714	0	5	0	2	9	0.222222	0	0	20	0	0	14	0	0	119	0	0.454545	4	5	0.8	1	4	0.25	0	2	0
chr1	132960780	-	T	chr1:132960780	Mdm4	SINE	UTR	3_prime_UTR_variant	0	0	132959050	1730	downstream	undefined	ADAR	0.272727	3	6	0.5	0	11	0	3	5	0.6	0	0	25	0	0	14	0	0	120	0	0.555556	3	4	0.75	1	3	0.333333	1	2	0.5
chr1	132970522	-	T	chr1:132970522	Mdm4	SINE	Intron	non_coding_transcript_variant	0	0	-	-	-	-	ADARB1	0.0909091	2	12	0.166667	0	2	0	1	19	0.0526316	0	0	31	0	0	29	0	0	116	0	0	0	7	0	0	8	0	0	2	0
chr1	132975806	-	T	chr1:132975806	Mdm4	LTR	Intron	intron_variant	0	0	-	-	-	-	ADARB1	0.125	0	13	0	2	14	0.142857	3	13	0.230769	0	0	30	0	0	31	0	0	129	0	0	0	6	0	0	1	0	0	1	0
chr1	132980299	-	T	chr1:132980299	Mdm4	SINE	Intron	intron_variant	0	0	132978103	2196	downstream	intronic	ADAR	0.111111	1	18	0.0555556	2	10	0.2	2	17	0.117647	0	0	25	0	0	25	0	0	67	0	0.117647	0	5	0	0	4	0	2	8	0.25
chr1	132980300	-	T	chr1:132980300	Mdm4	SINE	Intron	intron_variant	0	0	132978103	2197	downstream	intronic	ADAR	0.125	3	21	0.142857	0	10	0	3	17	0.176471	0	0	27	0	0	27	0	0	60	0	0.125	0	5	0	0	3	0	2	8	0.25
chr1	13298320	-	T	chr1:13298320	Gm37702,Ncoa2	SINE	Exon	non_coding_transcript_exon_variant	0	0	13298009	311	downstream	Exon	ADARB1	0.0444444	2	60	0.0333333	1	34	0.0294118	3	41	0.0731707	0	0	80	0	0	66	0	0	43	0	0	0	21	0	0	17	0	0	18	0
chr1	132984052	-	T	chr1:132984052	Mdm4	SINE	Intron	intron_variant	0	0	-	-	-	-	ADAR	0.0337553	4	100	0.04	2	63	0.031746	2	74	0.027027	0	0	107	0	0	93	0	0	58	0	0.0366972	2	46	0.0434783	2	29	0.0689655	0	34	0
chr1	132985827	-	T	chr1:132985827	Mdm4	SINE	Intron	intron_variant	0	0	-	-	-	-	ADAR	0.062069	4	45	0.0888889	0	35	0	5	65	0.0769231	0	0	99	0	0	70	0	0	46	0	0.0547945	1	29	0.0344828	3	28	0.107143	0	16	0
chr1	132985837	-	T	chr1:132985837	Mdm4	SINE	Intron	intron_variant	1	1	-	-	-	-	ADAR	0.0866667	7	46	0.152174	0	37	0	6	67	0.0895522	0	0	90	0	0	71	0	0	46	0	0.138889	2	28	0.0714286	6	25	0.24	2	19	0.105263
chr1	132999565	-	T	chr1:132999565	Mdm4	SINE	Intron	regulatory_region_variant	1	1	133000206	641	upstream	intronic	ADAR	0.176471	19	125	0.152	15	93	0.16129	23	105	0.219048	0	0	163	0	0	117	0	0	3	0	0.0529101	5	60	0.0833333	1	68	0.0147059	4	61	0.0655738
chr1	132999627	-	T	chr1:132999627	Mdm4	SINE	Intron	regulatory_region_variant	1	1	133000145	518	upstream	intronic	ADARB1	0.0343511	4	96	0.0416667	1	71	0.0140845	4	95	0.0421053	0	0	173	0	0	139	0	0	32	0	0	0	52	0	0	54	0	0	51	0
chr1	133000169	-	T	chr1:133000169	Mdm4	SINE	Intron	regulatory_region_variant	0	0	-	-	-	-	ADARB1	0.0327869	1	50	0.02	2	47	0.0425532	3	86	0.0348837	0	0	127	0	0	108	0	0	4	0	0	0	26	0	0	25	0	0	32	0
chr1	133000190	-	T	chr1:133000190	Mdm4	SINE	Intron	regulatory_region_variant	0	0	132999387	803	downstream	intronic	ADARB1	0.0898876	7	51	0.137255	2	45	0.0444444	7	82	0.0853659	0	0	123	0	0	99	0	0	10	0	0	0	26	0	0	26	0	0	32	0
chr1	133016897	-	T	chr1:133016897	Mdm4	SINE	Intron	non_coding_transcript_variant	0	0	133016226	671	downstream	intronic	ADARB1	0.205882	4	10	0.4	2	8	0.25	1	16	0.0625	0	0	39	0	0	29	0	0	13	0	0	0	9	0	0	5	0	0	11	0
chr1	133016907	-	T	chr1:133016907	Mdm4	SINE	Intron	non_coding_transcript_variant	0	0	133016219	688	downstream	intronic	ADAR	0.25	1	9	0.111111	2	7	0.285714	5	16	0.3125	0	0	37	0	0	30	0	0	17	0	0.04	1	12	0.0833333	0	4	0	0	9	0
chr1	133016957	-	T	chr1:133016957	Mdm4	SINE	Intron	non_coding_transcript_variant	0	0	-	-	-	-	ADAR	0.139535	2	18	0.111111	1	6	0.166667	3	19	0.157895	0	0	56	0	0	50	0	0	29	0	0.0952381	1	7	0.142857	1	6	0.166667	0	8	0
chr1	133016958	-	T	chr1:133016958	Mdm4	SINE	Intron	non_coding_transcript_variant	0	0	-	-	-	-	ADARB1	0.108696	3	19	0.157895	1	9	0.111111	1	18	0.0555556	0	0	56	0	0	51	0	0	18	0	0	0	7	0	0	5	0	0	8	0
chr1	133016964	-	T	chr1:133016964	Mdm4	SINE	Intron	non_coding_transcript_variant	0	0	-	-	-	-	ADAR	0.0930233	1	17	0.0588235	0	8	0	3	18	0.166667	0	0	58	0	0	51	0	0	19	0	0.0588235	1	6	0.166667	0	5	0	0	6	0
chr1	133088734	+	A	chr1:133088734	Pik3c2b	SINE	Intron	intron_variant	0	0	-	-	-	-	ADARB1	0.151163	5	24	0.208333	4	31	0.129032	4	31	0.129032	0	0	25	0	0	29	0	0	87	0	0	0	6	0	0	7	0	0	7	0
chr1	133088749	+	A	chr1:133088749	Pik3c2b	SINE	Intron	intron_variant	0	0	133086659	2090	upstream	intronic	ADARB1	0.0434783	2	26	0.0769231	1	34	0.0294118	1	32	0.03125	0	0	27	0	0	26	0	0	112	0	0	0	6	0	0	8	0	0	9	0
chr1	133089162	+	A	chr1:133089162	Pik3c2b	SINE	Intron	intron_variant	0	0	-	-	-	-	ADAR	0.425926	3	20	0.15	12	18	0.666667	8	16	0.5	0	0	18	0	0	16	0	0	111	0	0.0769231	0	7	0	2	15	0.133333	0	4	0
chr1	133097443	+	A	chr1:133097443	Pik3c2b	SINE	Intron	intron_variant	0	0	133098450	1007	downstream	intronic	ADARB1	0.113636	0	18	0	1	9	0.111111	4	17	0.235294	0	0	17	0	0	10	0	0	89	0	0	0	6	0	0	6	0	0	4	0
chr1	133097465	+	A	chr1:133097465	Pik3c2b	SINE	Intron	intron_variant	0	0	133098427	962	downstream	intronic	ADARB1	0.0784314	1	20	0.05	0	10	0	3	21	0.142857	0	0	26	0	0	11	0	0	108	0	0	0	3	0	0	6	0	0	4	0
chr1	133097469	+	A	chr1:133097469	Pik3c2b	SINE	Intron	intron_variant	0	0	133098425	956	downstream	intronic	ADARB1	0.137255	3	17	0.176471	2	11	0.181818	2	23	0.0869565	0	0	28	0	0	11	0	0	93	0	0	0	4	0	0	6	0	0	4	0
chr1	133097481	+	A	chr1:133097481	Pik3c2b	SINE	Intron	intron_variant	0	0	133098410	929	downstream	intronic	ADARB1	0.0655738	2	22	0.0909091	2	15	0.133333	0	24	0	0	0	31	0	0	10	0	0	86	0	0	0	4	0	0	6	0	0	4	0
chr1	133097482	+	A	chr1:133097482	Pik3c2b	SINE	Intron	intron_variant	0	0	133098411	929	downstream	intronic	ADARB1	0.245902	4	22	0.181818	8	15	0.533333	3	24	0.125	0	0	32	0	0	10	0	0	15	0	0	0	4	0	0	6	0	0	4	0
chr1	133097493	+	A	chr1:133097493	Pik3c2b	SINE	Intron	intron_variant	0	0	-	-	-	-	ADARB1	0.129032	1	21	0.047619	3	16	0.1875	4	25	0.16	0	0	41	0	0	13	0	0	14	0	0	0	2	0	0	7	0	0	4	0
chr1	133197148	+	A	chr1:133197148	Plekha6	SINE	Intron	intron_variant	0	0	133197856	708	downstream	intronic	ADAR	0.0666667	2	40	0.05	4	27	0.148148	0	23	0	0	0	13	0	0	34	0	0	24	0	0.0909091	2	5	0.4	0	7	0	0	10	0
chr1	133205567	+	A	chr1:133205567	Plekha6	SINE	Intron	regulatory_region_variant	0	0	133206851	1284	downstream	intronic	ADAR	0.151515	4	14	0.285714	0	8	0	1	11	0.0909091	0	0	5	0	0	15	0	0	25	0	0.2	1	2	0.5	0	8	0	2	5	0.4
chr1	133205884	+	A	chr1:133205884	Plekha6	SINE	Intron	intron_variant	0	0	133205583	301	upstream	intronic	ADARB1	0.0566038	0	32	0	4	30	0.133333	2	44	0.0454545	0	0	12	0	0	31	0	0	23	0	0	0	5	0	0	8	0	0	5	0
chr1	133232436	+	A	chr1:133232436	Plekha6	SINE	Intron	intron_variant	0	0	-	-	-	-	ADAR	0.19403	2	23	0.0869565	5	40	0.125	19	71	0.267606	0	0	27	0	0	47	0	0	20	0	0.352941	10	15	0.666667	1	8	0.125	1	11	0.0909091
chr1	133232445	+	A	chr1:133232445	Plekha6	SINE	Intron	intron_variant	0	0	-	-	-	-	ADAR	0.162602	0	22	0	9	36	0.25	11	65	0.169231	0	0	22	0	0	43	0	0	18	0	0.37931	7	13	0.538462	2	7	0.285714	2	9	0.222222
chr1	13347840	-	T	chr1:13347840	Gm38120,Ncoa2	SINE	Exon	non_coding_transcript_exon_variant	0	0	-	-	-	-	ADAR	0.0404624	3	59	0.0508475	3	44	0.0681818	1	70	0.0142857	0	0	115	0	0	82	0	0	76	0	0.00826446	0	51	0	0	34	0	1	36	0.0277778
chr1	13355269	-	T	chr1:13355269	Gm38380,Ncoa2	SINE	Exon	non_coding_transcript_exon_variant	0	0	-	-	-	-	ADARB1	0.0568182	1	73	0.0136986	2	38	0.0526316	7	65	0.107692	0	0	98	0	0	70	0	0	44	0	0	0	35	0	0	43	0	0	35	0
chr1	13355278	-	T	chr1:13355278	Gm38380,Ncoa2	SINE	Exon	non_coding_transcript_exon_variant	0	0	-	-	-	-	ADAR	0.0860215	3	77	0.038961	5	42	0.119048	8	67	0.119403	0	0	100	0	0	74	0	0	48	0	0.0333333	0	38	0	4	46	0.0869565	0	36	0
chr1	13360047	-	T	chr1:13360047	Gm38380,Ncoa2	SINE	Intron	non_coding_transcript_variant	0	0	13357649	2398	downstream	intronic	ADARB1	0.0829268	5	96	0.0520833	7	47	0.148936	5	62	0.0806452	0	0	102	0	0	69	0	0	58	0	0	0	24	0	0	33	0	0	14	0
chr1	13360052	-	T	chr1:13360052	Gm38380,Ncoa2	SINE	Intron	non_coding_transcript_variant	0	0	13357644	2408	downstream	intronic	ADARB1	0.1	9	107	0.0841121	7	47	0.148936	6	66	0.0909091	0	0	101	0	0	73	0	0	62	0	0	0	23	0	0	35	0	0	15	0
chr1	133628293	-	T	chr1:133628293	Gm38394,Zc3h11a	SINE	Intron	NMD_transcript_variant	0	0	-	-	-	-	ADARB1	0.122807	5	32	0.15625	0	13	0	2	12	0.166667	0	0	24	0	0	11	0	0	10	0	0	0	14	0	0	18	0	0	18	0
chr1	133635638	-	T	chr1:133635638	Gm38394,Zc3h11a	SINE	Intron	NMD_transcript_variant	0	0	-	-	-	-	ADAR	0.196078	1	10	0.1	3	19	0.157895	6	22	0.272727	0	0	35	0	0	32	0	0	10	0	0.242424	3	12	0.25	5	14	0.357143	0	7	0
chr1	133635642	-	T	chr1:133635642	Gm38394,Zc3h11a	SINE	Intron	NMD_transcript_variant	0	0	133636424	782	upstream	Intron	ADARB1	0.192308	3	11	0.272727	1	19	0.0526316	6	22	0.272727	0	0	35	0	0	35	0	0	10	0	0	0	11	0	0	16	0	0	7	0
chr1	133697381	-	T	chr1:133697381	Atp2b4	SINE	intergenic	downstream_gene_variant	0	0	133699215	1834	upstream	undefined	ADARB1	0.625	5	8	0.625	1	2	0.5	4	6	0.666667	0	0	1	0	0	5	0	0	11	0	0	0	2	0	0	1	0	0	2	0
chr1	133699167	-	T	chr1:133699167	Atp2b4	SINE	intergenic	regulatory_region_variant	0	0	133697428	1739	downstream	undefined	ADAR	0.15	1	6	0.166667	2	4	0.5	0	10	0	0	0	3	0	0	2	0	0	11	0	0.2	1	3	0.333333	0	0	NA	0	2	0
chr1	133700110	-	T	chr1:133700110	Atp2b4	SINE	UTR	3_prime_UTR_variant	0	0	133697645	2465	downstream	undefined	ADARB1	0.222222	2	4	0.5	2	7	0.285714	0	7	0	0	0	1	0	0	1	0	0	11	0	0	0	3	0	0	6	0	0	5	0
chr1	133725062	-	T	chr1:133725062	Atp2b4,Mir6903	SINE	Intron	intron_variant	0	0	-	-	-	-	ADARB1	0.142857	1	5	0.2	0	7	0	2	9	0.222222	0	0	7	0	0	2	0	0	11	0	0	0	8	0	0	1	0	0	1	0
chr1	133762391	-	T	chr1:133762391	Atp2b4	SINE	Intron	non_coding_transcript_variant	0	0	133763690	1299	upstream	intronic	ADARB1	0.0697674	2	17	0.117647	0	9	0	1	17	0.0588235	0	0	4	0	0	10	0	0	19	0	0	0	5	0	0	5	0	0	5	0
chr1	133762410	-	T	chr1:133762410	Atp2b4	SINE	Intron	non_coding_transcript_variant	0	0	133759957	2453	downstream	intronic	ADARB1	0.372093	7	18	0.388889	2	8	0.25	7	17	0.411765	0	0	4	0	0	11	0	0	12	0	0	0	5	0	0	6	0	0	4	0
chr1	133762455	-	T	chr1:133762455	Atp2b4	SINE	Intron	non_coding_transcript_variant	0	0	133763626	1171	upstream	intronic	ADARB1	0.1	3	22	0.136364	0	6	0	1	12	0.0833333	0	0	4	0	0	4	0	0	7	0	0	0	3	0	0	7	0	0	1	0
chr1	133791216	-	T	chr1:133791216	Atp2b4	LTR	Intron	non_coding_transcript_variant	0	0	-	-	-	-	ADARB1	0.108108	3	29	0.103448	3	26	0.115385	2	19	0.105263	0	0	4	0	0	12	0	0	26	0	0	0	5	0	0	7	0	0	0	NA
chr1	133791217	-	T	chr1:133791217	Atp2b4	LTR	Intron	non_coding_transcript_variant	0	0	-	-	-	-	ADARB1	0.173333	5	29	0.172414	8	26	0.307692	0	20	0	0	0	4	0	0	12	0	0	25	0	0	0	4	0	0	7	0	0	0	NA
chr1	133791241	-	T	chr1:133791241	Atp2b4	LTR	Intron	non_coding_transcript_variant	0	0	-	-	-	-	ADAR	0.0555556	1	30	0.0333333	4	27	0.148148	0	33	0	0	0	3	0	0	8	0	0	8	0	0.181818	2	4	0.5	0	7	0	0	0	NA
chr1	133791441	-	T	chr1:133791441	Atp2b4	LTR	Intron	non_coding_transcript_variant	0	0	-	-	-	-	ADARB1	0.0925926	2	19	0.105263	1	18	0.0555556	2	17	0.117647	0	0	1	0	0	8	0	0	18	0	0	0	8	0	0	8	0	0	0	NA
chr1	133791484	-	T	chr1:133791484	Atp2b4	LTR	Intron	non_coding_transcript_variant	0	0	-	-	-	-	ADARB1	0.233333	3	18	0.166667	8	27	0.296296	3	15	0.2	0	0	2	0	0	9	0	0	18	0	0	0	5	0	0	5	0	0	2	0
chr1	133794854	-	T	chr1:133794854	Atp2b4	LTR	Intron	non_coding_transcript_variant	0	0	-	-	-	-	ADAR	0.133333	3	15	0.2	2	21	0.0952381	1	9	0.111111	0	0	5	0	0	6	0	0	3	0	0.2	3	13	0.230769	2	9	0.222222	0	3	0
chr1	134227010	-	T	chr1:134227010	Adora1	LINE	Intron	intron_variant	0	0	134226166	844	downstream	intronic	ADARB1	0.0342466	1	60	0.0166667	3	43	0.0697674	1	43	0.0232558	0	0	8	0	0	21	0	0	6	0	0	0	21	0	0	13	0	0	15	0
chr1	134227012	-	T	chr1:134227012	Adora1	LINE	Intron	intron_variant	0	0	134226163	849	downstream	intronic	ADAR	0.0544218	1	60	0.0166667	4	43	0.0930233	3	44	0.0681818	0	0	11	0	0	22	0	0	6	0	0.0196078	0	23	0	1	12	0.0833333	0	16	0
chr1	134227022	-	T	chr1:134227022	Adora1	LINE	Intron	intron_variant	0	0	-	-	-	-	ADARB1	0.0254777	3	56	0.0535714	0	51	0	1	50	0.02	0	0	11	0	0	21	0	0	12	0	0	0	22	0	0	15	0	0	14	0
chr1	134302069	-	T	chr1:134302069	Ppfia4	SINE	Intron	non_coding_transcript_variant	0	0	-	-	-	-	ADARB1	0.025974	3	72	0.0416667	1	76	0.0131579	2	83	0.0240964	0	0	37	0	0	45	0	0	8	0	0	0	38	0	0	34	0	0	23	0
chr1	134338250	-	T	chr1:134338250	-	SINE	intergenic	intergenic_variant	0	0	134338810	560	upstream	undefined	ADAR	0.302632	9	16	0.5625	4	21	0.190476	10	39	0.25641	0	0	24	0	0	23	0	0	7	0	0.178218	7	31	0.225806	5	40	0.125	6	30	0.2
chr1	134338251	-	T	chr1:134338251	-	SINE	intergenic	intergenic_variant	0	0	134338809	558	upstream	undefined	ADAR	0.197368	6	18	0.333333	1	20	0.05	8	38	0.210526	0	0	24	0	0	23	0	0	10	0	0.0485437	3	32	0.09375	1	41	0.0243902	1	30	0.0333333
chr1	134338258	-	T	chr1:134338258	-	SINE	intergenic	intergenic_variant	0	0	134338802	544	upstream	undefined	ADARB1	0.0465116	2	24	0.0833333	1	23	0.0434783	1	39	0.025641	0	0	25	0	0	21	0	0	12	0	0	0	40	0	0	49	0	0	33	0
chr1	134338267	-	T	chr1:134338267	-	SINE	intergenic	intergenic_variant	0	0	134338794	527	upstream	undefined	ADARB1	0.2	7	24	0.291667	4	23	0.173913	6	38	0.157895	0	0	26	0	0	24	0	0	12	0	0	0	41	0	0	54	0	0	35	0
chr1	134338306	-	T	chr1:134338306	-	SINE	intergenic	intergenic_variant	0	0	134338755	449	upstream	undefined	ADARB1	0.0854701	4	35	0.114286	5	37	0.135135	1	45	0.0222222	0	0	37	0	0	35	0	0	16	0	0	0	53	0	0	56	0	0	43	0
chr1	134338312	-	T	chr1:134338312	-	SINE	intergenic	intergenic_variant	0	0	-	-	-	-	ADAR	0.134454	6	35	0.171429	3	36	0.0833333	7	48	0.145833	0	0	37	0	0	35	0	0	15	0	0.210526	10	53	0.188679	16	54	0.296296	6	45	0.133333
chr1	134338318	-	T	chr1:134338318	-	SINE	intergenic	intergenic_variant	0	0	-	-	-	-	ADAR	0.102564	5	35	0.142857	5	40	0.125	2	42	0.047619	0	0	36	0	0	35	0	0	14	0	0.175573	13	49	0.265306	7	46	0.152174	3	36	0.0833333
chr1	134338811	-	T	chr1:134338811	-	SINE	intergenic	intergenic_variant	0	0	134338249	562	downstream	undefined	ADAR	0.238095	6	21	0.285714	4	15	0.266667	5	27	0.185185	0	0	24	0	0	11	0	0	10	0	0.0357143	0	16	0	0	23	0	2	17	0.117647
chr1	134338815	-	T	chr1:134338815	-	SINE	intergenic	intergenic_variant	0	0	134338245	570	downstream	undefined	ADAR	0.0634921	2	21	0.0952381	1	15	0.0666667	1	27	0.037037	0	0	24	0	0	11	0	0	19	0	0.259259	3	15	0.2	8	22	0.363636	3	17	0.176471
chr1	134338835	-	T	chr1:134338835	-	SINE	intergenic	intergenic_variant	0	0	134338223	612	downstream	undefined	ADAR	0.52381	9	17	0.529412	8	12	0.666667	5	13	0.384615	0	0	21	0	0	9	0	0	21	0	0.0666667	1	17	0.0588235	0	21	0	3	22	0.136364
chr1	134417222	+	A	chr1:134417222	Adipor1	SINE	Intron	non_coding_transcript_variant	0	0	134417627	405	downstream	intronic	ADARB1	0.0987654	0	24	0	2	24	0.0833333	6	33	0.181818	0	0	24	0	0	42	0	0	18	0	0	0	11	0	0	15	0	0	21	0
chr1	134417600	+	A	chr1:134417600	Adipor1	SINE	Intron	non_coding_transcript_variant	0	0	-	-	-	-	ADARB1	0.0792079	2	36	0.0555556	2	24	0.0833333	4	41	0.097561	0	0	38	0	0	26	0	0	20	0	0	0	14	0	0	2	0	0	8	0
chr1	134417671	+	A	chr1:134417671	Adipor1	SINE	Intron	non_coding_transcript_variant	0	0	-	-	-	-	ADARB1	0.0390625	2	51	0.0392157	1	38	0.0263158	2	39	0.0512821	0	0	72	0	0	43	0	0	44	0	0	0	27	0	0	9	0	0	14	0
chr1	134460102	+	A	chr1:134460102	Gm37935,Klhl12	SINE	Intron	non_coding_transcript_variant	0	0	134457818	2284	upstream	intronic	ADARB1	0.368421	4	8	0.5	1	5	0.2	2	6	0.333333	0	0	19	0	0	9	0	0	21	0	0	0	4	0	0	1	0	0	3	0
chr1	134464997	+	A	chr1:134464997	Klhl12	SINE	Intron	non_coding_transcript_exon_variant	0	0	134466737	1740	downstream	intronic	ADAR	0.133333	4	21	0.190476	0	8	0	4	31	0.129032	0	0	34	0	0	10	0	0	21	0	0.222222	1	2	0.5	0	3	0	1	4	0.25
chr1	134465049	+	A	chr1:134465049	Klhl12	SINE	Intron	non_coding_transcript_exon_variant	0	0	134466685	1636	downstream	intronic	ADARB1	0.107143	2	32	0.0625	2	15	0.133333	5	37	0.135135	0	0	51	0	0	22	0	0	19	0	0	0	7	0	0	3	0	0	4	0
chr1	134465222	+	A	chr1:134465222	Klhl12	SINE	Intron	non_coding_transcript_exon_variant	0	0	-	-	-	-	ADARB1	0.0769231	3	16	0.1875	1	13	0.0769231	0	23	0	0	0	39	0	0	21	0	0	23	0	0	0	9	0	0	1	0	0	6	0
chr1	134465327	+	A	chr1:134465327	Klhl12	SINE	Intron	non_coding_transcript_exon_variant	0	0	134465059	268	upstream	intronic	ADAR	0.55	11	13	0.846154	4	11	0.363636	7	16	0.4375	0	0	31	0	0	18	0	0	34	0	0.6	9	15	0.6	5	6	0.833333	1	4	0.25
chr1	134484857	+	A	chr1:134484857	Klhl12	SINE	Intron	non_coding_transcript_variant	0	0	134485886	1029	downstream	exonic	ADAR	0.360656	7	17	0.411765	5	18	0.277778	10	26	0.384615	0	0	23	0	0	11	0	0	34	0	0.416667	0	2	0	3	7	0.428571	2	3	0.666667
chr1	134484871	+	A	chr1:134484871	Klhl12	SINE	Intron	non_coding_transcript_variant	0	0	-	-	-	-	ADARB1	0.0769231	3	21	0.142857	2	18	0.111111	0	26	0	0	0	21	0	0	14	0	0	33	0	0	0	2	0	0	7	0	0	2	0
chr1	134485137	+	A	chr1:134485137	Klhl12	SINE	Intron	non_coding_transcript_variant	0	0	134482658	2479	upstream	intronic	ADARB1	0.4375	2	7	0.285714	4	6	0.666667	1	3	0.333333	0	0	17	0	0	10	0	0	14	0	0	0	1	0	0	4	0	0	0	NA
chr1	134491436	+	A	chr1:134491436	Klhl12,Rabif	SINE	intergenic	regulatory_region_variant	0	0	134491104	332	upstream	undefined	ADARB1	0.4375	6	16	0.375	5	13	0.384615	10	19	0.526316	0	0	23	0	0	17	0	0	13	0	0	0	4	0	0	4	0	0	4	0
chr1	134502247	+	A	chr1:134502247	Gm25612,Rabif	SINE	Intron	intron_variant	0	0	-	-	-	-	ADARB1	0.0408163	1	17	0.0588235	0	10	0	1	22	0.0454545	0	0	7	0	0	15	0	0	8	0	0	0	1	0	0	3	0	0	2	0
chr1	134563962	+	A	chr1:134563962	Kdm5b	SINE	Intron	non_coding_transcript_variant	0	0	134565064	1102	downstream	intronic	ADAR	0.190789	8	43	0.186047	9	46	0.195652	12	63	0.190476	0	0	53	0	0	33	0	0	17	0	0.0784314	0	14	0	3	24	0.125	1	13	0.0769231
chr1	134563994	+	A	chr1:134563994	Kdm5b	SINE	Intron	non_coding_transcript_variant	0	0	134565032	1038	downstream	intronic	ADAR	0.157895	8	53	0.150943	6	48	0.125	13	70	0.185714	0	0	57	0	0	46	0	0	15	0	0.0576923	1	17	0.0588235	0	19	0	2	16	0.125
chr1	134565055	+	A	chr1:134565055	Kdm5b	SINE	Intron	regulatory_region_variant	0	0	134565897	842	downstream	intronic	ADARB1	0.22449	8	19	0.421053	2	14	0.142857	1	16	0.0625	0	0	32	0	0	7	0	0	18	0	0	0	6	0	0	7	0	0	9	0
chr1	134568211	+	A	chr1:134568211	Kdm5b	SINE	Intron	non_coding_transcript_variant	0	0	134570192	1981	downstream	intronic	ADAR	0.0707965	2	42	0.047619	2	32	0.0625	4	39	0.102564	0	0	35	0	0	41	0	0	11	0	0.03125	0	11	0	1	10	0.1	0	11	0
chr1	134568271	+	A	chr1:134568271	Kdm5b	SINE	Intron	non_coding_transcript_variant	0	0	134570131	1860	downstream	intronic	ADARB1	0.038961	1	34	0.0294118	1	20	0.05	1	23	0.0434783	0	0	20	0	0	23	0	0	6	0	0	0	11	0	0	9	0	0	6	0
chr1	134572393	+	A	chr1:134572393	Kdm5b	SINE	Intron	non_coding_transcript_variant	0	0	-	-	-	-	ADAR	0.0943396	1	13	0.0769231	3	30	0.1	1	10	0.1	0	0	23	0	0	15	0	0	18	0	0.0714286	0	6	0	2	13	0.153846	0	9	0
chr1	134575977	+	A	chr1:134575977	Kdm5b	SINE	Intron	regulatory_region_variant	0	0	-	-	-	-	ADARB1	0.0454545	1	20	0.05	2	15	0.133333	0	31	0	0	0	27	0	0	26	0	0	16	0	0	0	17	0	0	9	0	0	10	0
chr1	134577188	+	A	chr1:134577188	Kdm5b	SINE	Intron	non_coding_transcript_variant	0	0	134578572	1384	downstream	intronic	ADARB1	0.0555556	2	36	0.0555556	0	16	0	2	20	0.1	0	0	34	0	0	12	0	0	20	0	0	0	15	0	0	21	0	0	17	0
chr1	134577189	+	A	chr1:134577189	Kdm5b	SINE	Intron	non_coding_transcript_variant	0	0	134578572	1383	downstream	intronic	ADARB1	0.0724638	2	35	0.0571429	1	14	0.0714286	2	20	0.1	0	0	34	0	0	12	0	0	10	0	0	0	15	0	0	20	0	0	18	0
chr1	134577204	+	A	chr1:134577204	Kdm5b	SINE	Intron	non_coding_transcript_variant	0	0	-	-	-	-	ADAR	0.138889	6	39	0.153846	1	13	0.0769231	3	20	0.15	0	0	36	0	0	13	0	0	11	0	0.0192308	0	14	0	1	19	0.0526316	0	19	0
chr1	134577205	+	A	chr1:134577205	Kdm5b	SINE	Intron	non_coding_transcript_variant	0	0	-	-	-	-	ADARB1	0.0416667	1	40	0.025	0	13	0	2	19	0.105263	0	0	36	0	0	13	0	0	2	0	0	0	14	0	0	19	0	0	19	0
chr1	134578559	+	A	chr1:134578559	Kdm5b	SINE	Intron	non_coding_transcript_variant	0	0	134576339	2220	upstream	intronic	ADARB1	0.0948276	3	63	0.047619	3	19	0.157895	5	34	0.147059	0	0	20	0	0	19	0	0	13	0	0	0	11	0	0	9	0	0	9	0
chr1	134578560	+	A	chr1:134578560	Kdm5b	SINE	Intron	non_coding_transcript_variant	0	0	134576336	2224	upstream	intronic	ADARB1	0.136752	8	63	0.126984	4	20	0.2	4	34	0.117647	0	0	19	0	0	19	0	0	10	0	0	0	11	0	0	9	0	0	9	0
chr1	134587365	+	A	chr1:134587365	Kdm5b	SINE	Intron	non_coding_transcript_variant	0	0	134586730	635	upstream	intronic	ADARB1	0.0545455	0	23	0	1	13	0.0769231	2	19	0.105263	0	0	16	0	0	17	0	0	42	0	0	0	13	0	0	13	0	0	10	0
chr1	134591503	+	A	chr1:134591503	Kdm5b	SINE	Intron	non_coding_transcript_variant	0	0	-	-	-	-	ADAR	0.120482	5	27	0.185185	2	27	0.0740741	3	29	0.103448	0	0	40	0	0	41	0	0	40	0	0.02	0	11	0	0	16	0	1	23	0.0434783
chr1	134591879	+	A	chr1:134591879	Kdm5b	SINE	Intron	regulatory_region_variant	0	0	134593209	1330	downstream	intronic	ADAR	0.12	0	31	0	8	39	0.205128	4	30	0.133333	0	0	32	0	0	30	0	0	3	0	0.0357143	1	9	0.111111	0	8	0	0	11	0
chr1	134591880	+	A	chr1:134591880	Kdm5b	SINE	Intron	regulatory_region_variant	0	0	134593208	1328	downstream	intronic	ADARB1	0.284314	7	33	0.212121	16	39	0.410256	6	30	0.2	0	0	32	0	0	30	0	0	43	0	0	0	9	0	0	8	0	0	12	0
chr1	134591925	+	A	chr1:134591925	Kdm5b	SINE	Intron	regulatory_region_variant	0	0	-	-	-	-	ADARB1	0.09375	3	39	0.0769231	9	47	0.191489	0	42	0	0	0	40	0	0	26	0	0	34	0	0	0	12	0	0	10	0	0	14	0
chr1	134591933	+	A	chr1:134591933	Kdm5b	SINE	Intron	regulatory_region_variant	0	0	-	-	-	-	ADARB1	0.0839695	5	38	0.131579	5	48	0.104167	1	45	0.0222222	0	0	38	0	0	26	0	0	11	0	0	0	15	0	0	9	0	0	15	0
chr1	134602859	+	A	chr1:134602859	Kdm5b	SINE	Intron	non_coding_transcript_variant	0	0	134603669	810	downstream	intronic	ADARB1	0.148649	4	26	0.153846	3	15	0.2	4	33	0.121212	0	0	40	0	0	12	0	0	25	0	0	0	4	0	0	8	0	0	8	0
chr1	134602891	+	A	chr1:134602891	Kdm5b	SINE	Intron	non_coding_transcript_variant	0	0	134603637	746	downstream	intronic	ADARB1	0.120482	4	29	0.137931	1	18	0.0555556	5	36	0.138889	0	0	50	0	0	14	0	0	18	0	0	0	5	0	0	10	0	0	11	0
chr1	134603672	+	A	chr1:134603672	Kdm5b	SINE	Intron	regulatory_region_variant	0	0	134602855	817	upstream	intronic	ADARB1	0.236842	1	10	0.1	2	10	0.2	6	18	0.333333	0	0	27	0	0	10	0	0	18	0	0	0	10	0	0	11	0	0	8	0
chr1	134650372	+	A	chr1:134650372	Gm26783,Syt2	SINE	Intron	intron_variant	0	0	-	-	-	-	ADAR	0.19457	17	71	0.239437	10	64	0.15625	16	86	0.186047	0	0	31	0	0	65	0	0	19	0	0.01	1	35	0.0285714	0	43	0	0	22	0
chr1	134662917	+	A	chr1:134662917	Syt2	SINE	Intron	intron_variant	0	0	-	-	-	-	ADAR	0.0516432	4	76	0.0526316	3	65	0.0461538	4	72	0.0555556	0	0	18	0	0	39	0	0	19	0	0.0300752	0	61	0	3	50	0.06	1	22	0.0454545
chr1	134692618	+	A	chr1:134692618	Syt2	SINE	Intron	intron_variant	0	0	-	-	-	-	ADAR	0.136986	5	26	0.192308	2	30	0.0666667	3	17	0.176471	0	0	13	0	0	37	0	0	23	0	0.0555556	2	13	0.153846	0	15	0	0	8	0
chr1	134695038	+	A	chr1:134695038	Syt2	SINE	Intron	intron_variant	0	0	-	-	-	-	ADARB1	0.0425532	0	20	0	3	31	0.0967742	1	43	0.0232558	0	0	14	0	0	47	0	0	23	0	0	0	38	0	0	48	0	0	26	0
chr1	134730909	+	A	chr1:134730909	Syt2	SINE	Intron	intron_variant	0	0	134732028	1119	downstream	intronic	ADAR	0.0970874	5	31	0.16129	3	43	0.0697674	2	29	0.0689655	0	0	17	0	0	22	0	0	12	0	0.03125	0	10	0	0	12	0	1	10	0.1
chr1	134768820	-	T	chr1:134768820	Ppp1r12b	SINE	Intron	non_coding_transcript_variant	0	0	134769071	251	upstream	intronic	ADAR	0.0970874	2	49	0.0408163	1	22	0.0454545	7	32	0.21875	0	0	38	0	0	35	0	0	36	0	0.0625	2	27	0.0740741	2	27	0.0740741	1	26	0.0384615
chr1	134768847	-	T	chr1:134768847	Ppp1r12b	SINE	Intron	non_coding_transcript_variant	0	0	134769044	197	upstream	intronic	ADAR	0.0645161	2	30	0.0666667	0	12	0	2	20	0.1	0	0	31	0	0	27	0	0	25	0	0.015873	0	22	0	0	18	0	1	23	0.0434783
chr1	134768855	-	T	chr1:134768855	Ppp1r12b	SINE	Intron	non_coding_transcript_variant	0	0	134769034	179	upstream	intronic	ADARB1	0.0535714	2	26	0.0769231	0	11	0	1	19	0.0526316	0	0	30	0	0	26	0	0	26	0	0	0	21	0	0	15	0	0	23	0
chr1	134768856	-	T	chr1:134768856	Ppp1r12b	SINE	Intron	non_coding_transcript_variant	0	0	134769034	178	upstream	intronic	ADARB1	0.111111	2	24	0.0833333	2	11	0.181818	2	19	0.105263	0	0	29	0	0	26	0	0	38	0	0	0	21	0	0	15	0	0	21	0
chr1	134769045	-	T	chr1:134769045	Ppp1r12b	SINE	Intron	non_coding_transcript_variant	0	0	134768846	199	downstream	intronic	ADAR	0.259259	6	18	0.333333	2	19	0.105263	6	17	0.352941	0	0	15	0	0	17	0	0	40	0	0.027027	0	9	0	1	24	0.0416667	0	4	0
chr1	134769049	-	T	chr1:134769049	Ppp1r12b	SINE	Intron	non_coding_transcript_variant	0	0	134768843	206	downstream	intronic	ADARB1	0.0689655	0	22	0	1	19	0.0526316	3	17	0.176471	0	0	15	0	0	16	0	0	20	0	0	0	10	0	0	26	0	0	3	0
chr1	134769051	-	T	chr1:134769051	Ppp1r12b	SINE	Intron	non_coding_transcript_variant	0	0	134768840	211	downstream	intronic	ADARB1	0.22807	6	21	0.285714	1	19	0.0526316	6	17	0.352941	0	0	15	0	0	17	0	0	29	0	0	0	12	0	0	24	0	0	5	0
chr1	134769054	-	T	chr1:134769054	Ppp1r12b	SINE	Intron	non_coding_transcript_variant	0	0	134768837	217	downstream	intronic	ADAR	0.275862	6	22	0.272727	2	19	0.105263	8	17	0.470588	0	0	15	0	0	17	0	0	8	0	0.025	0	12	0	1	23	0.0434783	0	5	0
chr1	134769066	-	T	chr1:134769066	Ppp1r12b	SINE	Intron	non_coding_transcript_variant	0	0	134770366	1300	upstream	intronic	ADARB1	0.241379	3	21	0.142857	5	19	0.263158	6	18	0.333333	0	0	15	0	0	18	0	0	107	0	0	0	11	0	0	22	0	0	5	0
chr1	134779538	-	T	chr1:134779538	Ppp1r12b	LTR	Intron	non_coding_transcript_exon_variant	1	1	-	-	-	-	ADAR	0.35119	28	67	0.41791	11	43	0.255814	20	58	0.344828	0	0	39	0	0	86	0	0	60	0	0.123711	6	41	0.146341	4	31	0.129032	2	25	0.08
chr1	134780598	-	T	chr1:134780598	Ppp1r12b	LTR	Intron	non_coding_transcript_exon_variant	0	0	-	-	-	-	ADARB1	0.0792453	10	107	0.0934579	7	86	0.0813953	4	72	0.0555556	0	0	70	0	0	112	0	0	21	0	0	0	55	0	0	41	0	0	39	0
chr1	134780611	-	T	chr1:134780611	Ppp1r12b	LTR	Intron	non_coding_transcript_exon_variant	0	0	-	-	-	-	ADARB1	0.0496689	5	112	0.0446429	9	103	0.0873786	1	87	0.0114943	0	0	80	0	0	119	0	0	52	0	0	0	57	0	0	37	0	0	37	0
chr1	134780788	-	T	chr1:134780788	Ppp1r12b	LTR	Intron	non_coding_transcript_exon_variant	0	0	134779412	1376	downstream	intronic	ADARB1	0.0278746	3	76	0.0394737	4	98	0.0408163	1	113	0.00884956	0	0	75	0	0	115	0	0	26	0	0	0	71	0	0	46	0	0	38	0
chr1	134792385	-	T	chr1:134792385	Ppp1r12b	.	Intron	non_coding_transcript_variant	1	1	134794618	2233	upstream	intronic	ADAR	0.172043	12	78	0.153846	13	53	0.245283	7	55	0.127273	0	0	45	0	0	64	0	0	31	0	0.0182648	4	83	0.0481928	0	80	0	0	56	0
chr1	134794425	-	T	chr1:134794425	Ppp1r12b	SINE	Intron	non_coding_transcript_variant	0	0	-	-	-	-	ADARB1	0.0381679	2	52	0.0384615	1	34	0.0294118	2	45	0.0444444	0	0	52	0	0	42	0	0	25	0	0	0	24	0	0	24	0	0	31	0
chr1	134818924	-	T	chr1:134818924	Gm37677,Ppp1r12b	.	Intron	non_coding_transcript_variant	0	0	-	-	-	-	ADARB1	0.0227273	3	112	0.0267857	6	115	0.0521739	0	169	0	0	0	105	0	0	121	0	0	27	0	0	0	99	0	0	123	0	0	105	0
chr1	134820895	-	T	chr1:134820895	Gm37677,Ppp1r12b	LTR	Exon	non_coding_transcript_exon_variant	0	0	-	-	-	-	ADARB1	0.0366379	10	192	0.0520833	4	116	0.0344828	3	156	0.0192308	0	0	129	0	0	124	0	0	26	0	0	0	79	0	0	79	0	0	62	0
chr1	134855996	-	T	chr1:134855996	Ppp1r12b	SINE	Intron	non_coding_transcript_variant	0	0	134857604	1608	upstream	intronic	ADARB1	0.0769231	2	28	0.0714286	0	13	0	3	24	0.125	0	0	20	0	0	8	0	0	35	0	0	0	9	0	0	7	0	0	5	0
chr1	134856305	-	T	chr1:134856305	Ppp1r12b	.	Intron	non_coding_transcript_variant	0	0	134858454	2149	upstream	intronic	ADAR	0.0952381	3	21	0.142857	0	11	0	1	10	0.1	0	0	11	0	0	8	0	0	35	0	0.0131579	1	32	0.03125	0	27	0	0	17	0
chr1	134858465	-	T	chr1:134858465	Ppp1r12b	.	Intron	non_coding_transcript_variant	0	0	134856294	2171	downstream	intronic	ADARB1	0.103448	3	25	0.12	1	23	0.0434783	5	39	0.128205	0	0	27	0	0	12	0	0	36	0	0	0	26	0	0	25	0	0	12	0
chr1	134862550	-	T	chr1:134862550	Ppp1r12b	.	Intron	non_coding_transcript_variant	0	0	134863288	738	upstream	intronic	ADARB1	0.0337079	2	62	0.0322581	3	68	0.0441176	1	48	0.0208333	0	0	61	0	0	40	0	0	36	0	0	0	44	0	0	36	0	0	41	0
chr1	134862554	-	T	chr1:134862554	Ppp1r12b	.	Intron	non_coding_transcript_variant	0	0	134863285	731	upstream	intronic	ADARB1	0.0351759	4	62	0.0645161	2	81	0.0246914	1	56	0.0178571	0	0	69	0	0	50	0	0	34	0	0	0	45	0	0	38	0	0	40	0
chr1	134863299	-	T	chr1:134863299	Ppp1r12b	SINE	Intron	non_coding_transcript_variant	0	0	-	-	-	-	ADAR	0.0558659	4	58	0.0689655	6	61	0.0983607	0	60	0	0	0	59	0	0	44	0	0	87	0	0.00512821	0	74	0	0	67	0	1	54	0.0185185
chr1	134863310	-	T	chr1:134863310	Ppp1r12b	SINE	Intron	non_coding_transcript_variant	0	0	-	-	-	-	ADAR	0.0686275	6	64	0.09375	5	70	0.0714286	3	70	0.0428571	0	0	63	0	0	51	0	0	98	0	0.0422535	2	79	0.0253165	2	73	0.0273973	5	61	0.0819672
chr1	134895582	-	T	chr1:134895582	Ppp1r12b	SINE	Intron	non_coding_transcript_variant	0	0	-	-	-	-	ADARB1	0.0675676	1	23	0.0434783	0	25	0	4	26	0.153846	0	0	20	0	0	16	0	0	120	0	0	0	11	0	0	9	0	0	1	0
chr1	134895803	-	T	chr1:134895803	Ppp1r12b	SINE	Intron	non_coding_transcript_variant	0	0	134897531	1728	upstream	intronic	ADARB1	0.15873	5	17	0.294118	2	36	0.0555556	3	10	0.3	0	0	22	0	0	11	0	0	118	0	0	0	12	0	0	10	0	0	14	0
chr1	134895810	-	T	chr1:134895810	Ppp1r12b	SINE	Intron	non_coding_transcript_variant	0	0	134898273	2463	upstream	intronic	ADARB1	0.131148	3	17	0.176471	5	34	0.147059	0	10	0	0	0	21	0	0	11	0	0	79	0	0	0	12	0	0	9	0	0	13	0
chr1	134924740	-	T	chr1:134924740	Ppp1r12b	SINE	Intron	non_coding_transcript_variant	0	0	134925951	1211	upstream	intronic	ADARB1	0.0526316	1	19	0.0526316	2	22	0.0909091	1	35	0.0285714	0	0	21	0	0	25	0	0	49	0	0	0	30	0	0	24	0	0	16	0
chr1	134946335	-	T	chr1:134946335	Ppp1r12b	SINE	Intron	non_coding_transcript_variant	0	0	-	-	-	-	ADARB1	0.145161	0	13	0	2	19	0.105263	7	30	0.233333	0	0	12	0	0	16	0	0	114	0	0	0	6	0	0	2	0	0	7	0
chr1	134948072	-	T	chr1:134948072	Ppp1r12b	SINE	UTR	3_prime_UTR_variant	0	0	134946370	1702	downstream	intronic	ADARB1	0.0220588	2	52	0.0384615	1	36	0.0277778	0	48	0	0	0	29	0	0	38	0	0	156	0	0	0	26	0	0	19	0	0	15	0
chr1	134948101	-	T	chr1:134948101	Ppp1r12b	SINE	UTR	3_prime_UTR_variant	0	0	-	-	-	-	ADAR	0.0727273	5	70	0.0714286	6	42	0.142857	1	53	0.0188679	0	0	45	0	0	42	0	0	6	0	0.0135135	0	27	0	1	20	0.05	0	27	0
chr1	134948107	-	T	chr1:134948107	Ppp1r12b	SINE	UTR	3_prime_UTR_variant	0	0	134946333	1774	downstream	intronic	ADARB1	0.20122	11	68	0.161765	11	43	0.255814	11	53	0.207547	0	0	45	0	0	40	0	0	9	0	0	0	24	0	0	19	0	0	27	0
chr1	134949656	-	T	chr1:134949656	Ppp1r12b	SINE	Intron	non_coding_transcript_variant	0	0	-	-	-	-	ADARB1	0.24	6	28	0.214286	4	16	0.25	8	31	0.258065	0	0	5	0	0	19	0	0	24	0	0	0	12	0	0	25	0	0	17	0
chr1	134949659	-	T	chr1:134949659	Ppp1r12b	SINE	Intron	non_coding_transcript_variant	0	0	-	-	-	-	ADARB1	0.0657895	2	30	0.0666667	0	17	0	3	29	0.103448	0	0	5	0	0	18	0	0	54	0	0	0	13	0	0	26	0	0	17	0
chr1	134949661	-	T	chr1:134949661	Ppp1r12b	SINE	Intron	non_coding_transcript_variant	0	0	-	-	-	-	ADARB1	0.0512821	1	31	0.0322581	2	17	0.117647	1	30	0.0333333	0	0	4	0	0	20	0	0	60	0	0	0	13	0	0	27	0	0	17	0
chr1	134949668	-	T	chr1:134949668	Ppp1r12b	SINE	Intron	non_coding_transcript_variant	0	0	-	-	-	-	ADAR	0.0875	2	31	0.0645161	0	18	0	5	31	0.16129	0	0	4	0	0	22	0	0	41	0	0.0350877	0	13	0	2	27	0.0740741	0	17	0
chr1	134949672	-	T	chr1:134949672	Ppp1r12b	SINE	Intron	non_coding_transcript_variant	0	0	-	-	-	-	ADARB1	0.0641026	1	30	0.0333333	2	18	0.111111	2	30	0.0666667	0	0	4	0	0	20	0	0	48	0	0	0	13	0	0	25	0	0	18	0
chr1	134954169	-	T	chr1:134954169	Ppp1r12b	SINE	Intron	non_coding_transcript_variant	0	0	-	-	-	-	ADARB1	0.0466667	0	53	0	4	35	0.114286	3	62	0.0483871	0	0	41	0	0	29	0	0	14	0	0	0	42	0	0	31	0	0	21	0
chr1	134954175	-	T	chr1:134954175	Ppp1r12b	SINE	Intron	non_coding_transcript_variant	0	0	-	-	-	-	ADAR	0.0733333	4	52	0.0769231	3	37	0.0810811	4	61	0.0655738	0	0	38	0	0	30	0	0	5	0	0.0217391	0	41	0	1	30	0.0333333	1	21	0.047619
chr1	134954183	-	T	chr1:134954183	Ppp1r12b	SINE	Intron	non_coding_transcript_variant	0	0	-	-	-	-	ADARB1	0.10596	7	54	0.12963	3	34	0.0882353	6	63	0.0952381	0	0	35	0	0	29	0	0	5	0	0	0	41	0	0	29	0	0	21	0
chr1	134954193	-	T	chr1:134954193	Ppp1r12b	SINE	Intron	non_coding_transcript_variant	0	0	-	-	-	-	ADARB1	0.0662252	5	50	0.1	2	36	0.0555556	3	65	0.0461538	0	0	34	0	0	31	0	0	25	0	0	0	40	0	0	28	0	0	22	0
chr1	135006876	-	T	chr1:135006876	Lgr6	SINE	Intron	non_coding_transcript_variant	0	0	135006647	229	downstream	intronic	ADARB1	0.333333	2	4	0.5	4	10	0.4	0	4	0	0	0	3	0	0	9	0	0	21	0	0	0	6	0	0	0	NA	0	6	0
chr1	135006896	-	T	chr1:135006896	Lgr6	SINE	Intron	non_coding_transcript_variant	0	0	-	-	-	-	ADAR	0.210526	2	5	0.4	2	10	0.2	0	4	0	0	0	2	0	0	10	0	0	28	0	0.5	6	9	0.666667	0	0	NA	1	5	0.2
chr1	135153604	+	A	chr1:135153604	Arl8a,Gm15445,Gm26280	LTR	Intron	non_coding_transcript_variant	0	0	-	-	-	-	ADAR	0.139535	5	26	0.192308	2	20	0.1	5	40	0.125	0	0	52	0	0	35	0	0	33	0	0.0357143	0	19	0	2	23	0.0869565	0	14	0
chr1	135268606	-	T	chr1:135268606	Gm26642,Rnpep	SINE	Intron	regulatory_region_variant	0	0	-	-	-	-	ADAR	0.0825688	2	31	0.0645161	6	38	0.157895	1	40	0.025	0	0	28	0	0	32	0	0	32	0	0.0851064	0	15	0	0	15	0	4	17	0.235294
chr1	135269842	-	T	chr1:135269842	Gm26642,Rnpep	SINE	Intron	non_coding_transcript_variant	0	0	135270911	1069	upstream	intronic	ADARB1	0.0547945	1	34	0.0294118	2	22	0.0909091	1	17	0.0588235	0	0	19	0	0	26	0	0	17	0	0	0	11	0	0	12	0	0	8	0
chr1	135273021	-	T	chr1:135273021	Rnpep	SINE	Intron	non_coding_transcript_variant	0	0	-	-	-	-	ADARB1	0.0655738	1	25	0.04	2	18	0.111111	1	18	0.0555556	0	0	22	0	0	22	0	0	18	0	0	0	9	0	0	15	0	0	11	0
chr1	135281718	-	T	chr1:135281718	Rnpep	SINE	Intron	intron_variant	0	0	135282435	717	upstream	intronic	ADAR	0.04	1	34	0.0294118	2	28	0.0714286	1	38	0.0263158	0	0	22	0	0	21	0	0	20	0	0.030303	0	7	0	1	13	0.0769231	0	13	0
chr1	135281793	-	T	chr1:135281793	Rnpep	.	Intron	intron_variant	0	0	135282363	570	upstream	intronic	ADAR	0.150943	3	23	0.130435	1	9	0.111111	4	21	0.190476	0	0	18	0	0	15	0	0	21	0	0.0294118	0	11	0	1	17	0.0588235	0	6	0
chr1	135282356	-	T	chr1:135282356	Rnpep	SINE	Intron	intron_variant	0	0	135281800	556	downstream	intronic	ADARB1	0.0943396	0	17	0	2	12	0.166667	3	24	0.125	0	0	29	0	0	24	0	0	20	0	0	0	4	0	0	7	0	0	7	0
chr1	135388198	-	T	chr1:135388198	Ipo9	SINE	Intron	non_coding_transcript_variant	0	0	135388794	596	upstream	intronic	ADAR	0.0555556	5	36	0.138889	1	56	0.0178571	1	34	0.0294118	0	0	67	0	0	57	0	0	35	0	0.125	0	11	0	4	15	0.266667	1	14	0.0714286
chr1	135388211	-	T	chr1:135388211	Ipo9	SINE	Intron	non_coding_transcript_variant	0	0	-	-	-	-	ADAR	0.213675	8	34	0.235294	10	52	0.192308	7	31	0.225806	0	0	59	0	0	51	0	0	36	0	0.025641	0	13	0	0	14	0	1	12	0.0833333
chr1	135388840	-	T	chr1:135388840	Ipo9	SINE	Intron	non_coding_transcript_variant	0	0	135391252	2412	upstream	intronic	ADAR	0.0540541	5	41	0.121951	3	57	0.0526316	2	87	0.0229885	0	0	96	0	0	81	0	0	38	0	0.0144928	1	30	0.0333333	0	22	0	0	17	0
chr1	135388846	-	T	chr1:135388846	Ipo9	SINE	Intron	non_coding_transcript_variant	0	0	135391246	2400	upstream	intronic	ADAR	0.0666667	2	38	0.0526316	2	57	0.0350877	8	85	0.0941176	0	0	91	0	0	77	0	0	37	0	0.0294118	0	29	0	2	23	0.0869565	0	16	0
chr1	135399436	-	T	chr1:135399436	Ipo9	SINE	Intron	regulatory_region_variant	0	0	-	-	-	-	ADARB1	0.057971	2	23	0.0869565	1	17	0.0588235	1	29	0.0344828	0	0	73	0	0	14	0	0	5	0	0	0	20	0	0	18	0	0	16	0
chr1	135408583	-	T	chr1:135408583	Gm28277,Ipo9	SINE	Intron	non_coding_transcript_variant	0	0	-	-	-	-	ADARB1	0.209302	3	11	0.272727	5	18	0.277778	1	14	0.0714286	0	0	20	0	0	15	0	0	6	0	0	0	12	0	0	7	0	0	8	0
chr1	135411794	-	T	chr1:135411794	Gm28277,Ipo9	SINE	Intron	regulatory_region_variant	0	0	135409928	1866	downstream	exonic	ADARB1	0.0866142	3	28	0.107143	4	42	0.0952381	4	57	0.0701754	0	0	43	0	0	27	0	0	38	0	0	0	13	0	0	13	0	0	13	0
chr1	135417022	-	T	chr1:135417022	Gm28277,Ipo9	SINE	Intron	non_coding_transcript_variant	0	0	-	-	-	-	ADAR	0.0416667	1	38	0.0263158	1	50	0.02	4	56	0.0714286	0	0	48	0	0	58	0	0	33	0	0.0350877	0	12	0	0	22	0	2	23	0.0869565
chr1	135422063	-	T	chr1:135422063	Ipo9	SINE	Intron	NMD_transcript_variant	0	0	-	-	-	-	ADAR	0.261682	7	31	0.225806	4	36	0.111111	17	40	0.425	0	0	68	0	0	16	0	0	31	0	0.0634921	0	21	0	4	17	0.235294	0	25	0
chr1	135422645	-	T	chr1:135422645	Ipo9	SINE	Intron	NMD_transcript_variant	0	0	135423835	1190	upstream	intronic	ADARB1	0.0397727	0	47	0	1	56	0.0178571	6	73	0.0821918	0	0	45	0	0	55	0	0	21	0	0	0	21	0	0	22	0	0	14	0
chr1	135423529	-	T	chr1:135423529	Ipo9	SINE	Intron	NMD_transcript_variant	0	0	-	-	-	-	ADAR	0.0529801	1	48	0.0208333	1	34	0.0294118	6	69	0.0869565	0	0	44	0	0	51	0	0	50	0	0.108108	4	20	0.2	3	30	0.1	1	24	0.0416667
chr1	135423531	-	T	chr1:135423531	Ipo9	SINE	Intron	NMD_transcript_variant	0	0	-	-	-	-	ADARB1	0.0544218	2	48	0.0416667	1	34	0.0294118	5	65	0.0769231	0	0	45	0	0	51	0	0	35	0	0	0	21	0	0	30	0	0	23	0
chr1	135459470	-	T	chr1:135459470	Mir1231,Nav1	SINE	Intron	non_coding_transcript_exon_variant	0	0	-	-	-	-	ADARB1	0.0617284	1	36	0.0277778	0	17	0	4	28	0.142857	0	0	23	0	0	21	0	0	36	0	0	0	12	0	0	5	0	0	14	0
chr1	135473253	-	T	chr1:135473253	Nav1	SINE	Intron	non_coding_transcript_variant	0	0	-	-	-	-	ADAR	0.108696	1	42	0.0238095	3	18	0.166667	6	32	0.1875	0	0	17	0	0	19	0	0	46	0	0.025641	0	18	0	1	12	0.0833333	0	9	0
chr1	135478038	-	T	chr1:135478038	2610012C04Rik,Nav1	SINE	Intron	non_coding_transcript_variant	0	0	-	-	-	-	ADAR	0.0693878	9	110	0.0818182	7	57	0.122807	1	78	0.0128205	0	0	64	0	0	51	0	0	39	0	0.0352941	0	20	0	0	24	0	3	41	0.0731707
chr1	135482795	-	T	chr1:135482795	2610012C04Rik,Nav1	SINE	Intron	non_coding_transcript_variant	0	0	135483596	801	upstream	intronic	ADAR	0.166667	4	38	0.105263	4	35	0.114286	14	59	0.237288	0	0	40	0	0	42	0	0	97	0	0.0138889	1	22	0.0454545	0	20	0	0	30	0
chr1	135482845	-	T	chr1:135482845	2610012C04Rik,Nav1	SINE	Intron	non_coding_transcript_variant	0	0	135483547	702	upstream	intronic	ADARB1	0.0466667	2	46	0.0434783	4	43	0.0930233	1	61	0.0163934	0	0	48	0	0	48	0	0	96	0	0	0	20	0	0	20	0	0	31	0
chr1	135533653	-	T	chr1:135533653	Nav1	.	Intron	intron_variant	0	0	-	-	-	-	ADARB1	0.0322581	1	32	0.03125	0	29	0	2	32	0.0625	0	0	27	0	0	40	0	0	32	0	0	0	12	0	0	11	0	0	19	0
chr1	135572932	-	T	chr1:135572932	Nav1	.	Intron	intron_variant	0	0	135573760	828	upstream	intronic	ADARB1	0.2	2	9	0.222222	2	10	0.2	2	11	0.181818	0	0	13	0	0	8	0	0	17	0	0	0	12	0	0	13	0	0	4	0
chr1	135573751	-	T	chr1:135573751	Nav1	.	Intron	intron_variant	0	0	135572941	810	downstream	intronic	ADARB1	0.0411765	0	48	0	5	50	0.1	2	72	0.0277778	0	0	66	0	0	64	0	0	24	0	0	0	7	0	0	10	0	0	9	0
chr1	135597397	+	A	chr1:135597397	Gm4793,Nav1	LTR	Exon	non_coding_transcript_exon_variant	1	1	-	-	-	-	ADARB1	0.0545455	0	22	0	0	16	0	3	17	0.176471	0	0	67	0	0	43	0	0	57	0	0	0	8	0	0	3	0	0	11	0
chr1	135647071	-	T	chr1:135647071	Gm38399	SINE	Intron	non_coding_transcript_variant	0	0	135644907	2164	downstream	intronic	ADAR	0.205128	3	10	0.3	3	18	0.166667	2	11	0.181818	0	0	52	0	0	34	0	0	36	0	0.0909091	0	1	0	0	3	0	1	7	0.142857
chr1	136026737	-	T	chr1:136026737	Tmem9	SINE	Intron	intron_variant	0	0	-	-	-	-	ADAR	0.0759494	0	31	0	2	16	0.125	4	32	0.125	0	0	67	0	0	38	0	0	57	0	0.030303	0	11	0	1	8	0.125	0	14	0
chr1	13625006	-	T	chr1:13625006	Lactb2	SINE	UTR	3_prime_UTR_variant	0	0	-	-	-	-	ADARB1	0.0597015	1	22	0.0454545	2	24	0.0833333	1	21	0.047619	0	0	6	0	0	19	0	0	10	0	0	0	8	0	0	5	0	0	3	0
chr1	13625010	-	T	chr1:13625010	Lactb2	SINE	UTR	3_prime_UTR_variant	0	0	13625724	714	upstream	UTR	ADAR	0.202899	5	22	0.227273	6	26	0.230769	3	21	0.142857	0	0	6	0	0	19	0	0	10	0	0.125	2	8	0.25	0	5	0	0	3	0
chr1	13625013	-	T	chr1:13625013	Lactb2	SINE	UTR	3_prime_UTR_variant	0	0	13625721	708	upstream	UTR	ADARB1	0.0769231	1	18	0.0555556	3	25	0.12	1	22	0.0454545	0	0	7	0	0	18	0	0	10	0	0	0	8	0	0	5	0	0	3	0
chr1	13625036	-	T	chr1:13625036	Lactb2	SINE	UTR	3_prime_UTR_variant	1	1	-	-	-	-	ADARB1	0.253165	4	20	0.2	6	32	0.1875	10	27	0.37037	0	0	8	0	0	22	0	0	11	0	0	0	10	0	0	4	0	0	4	0
chr1	13625741	-	T	chr1:13625741	Lactb2	SINE	UTR	regulatory_region_variant	0	0	-	-	-	-	ADAR	0.707317	13	20	0.65	5	7	0.714286	11	14	0.785714	0	0	11	0	0	5	0	0	7	0	0.08	1	13	0.0769231	1	6	0.166667	0	6	0
chr1	136308361	-	T	chr1:136308361	Camsap2	LTR	Intron	intron_variant	0	0	136310199	1838	upstream	intronic	ADAR	0.284553	11	35	0.314286	11	47	0.234043	13	41	0.317073	0	0	36	0	0	56	0	0	61	0	0.0405405	1	23	0.0434783	2	27	0.0740741	0	24	0
chr1	136308377	-	T	chr1:136308377	Camsap2	LTR	Intron	intron_variant	0	0	-	-	-	-	ADAR	0.431034	16	35	0.457143	16	39	0.410256	18	42	0.428571	0	0	32	0	0	49	0	0	60	0	0.158537	3	21	0.142857	10	31	0.322581	0	30	0
chr1	136308380	-	T	chr1:136308380	Camsap2	LTR	Intron	intron_variant	0	0	-	-	-	-	ADAR	0.0521739	3	35	0.0857143	3	39	0.0769231	0	41	0	0	0	32	0	0	53	0	0	13	0	0.0833333	0	22	0	4	31	0.129032	3	31	0.0967742
chr1	136308381	-	T	chr1:136308381	Camsap2	LTR	Intron	intron_variant	0	0	-	-	-	-	ADAR	0.0982143	3	34	0.0882353	6	37	0.162162	2	41	0.0487805	0	0	31	0	0	53	0	0	15	0	0.0487805	0	22	0	4	31	0.129032	0	29	0
chr1	136308435	-	T	chr1:136308435	Camsap2	LTR	Intron	intron_variant	0	0	-	-	-	-	ADARB1	0.0582524	0	33	0	4	37	0.108108	2	33	0.0606061	0	0	29	0	0	44	0	0	40	0	0	0	33	0	0	29	0	0	29	0
chr1	136310096	-	T	chr1:136310096	Camsap2	LTR	Intron	intron_variant	0	0	-	-	-	-	ADARB1	0.0625	5	54	0.0925926	1	22	0.0454545	1	36	0.0277778	0	0	38	0	0	38	0	0	18	0	0	0	21	0	0	19	0	0	15	0
chr1	136310185	-	T	chr1:136310185	Camsap2	LTR	Intron	intron_variant	0	0	-	-	-	-	ADAR	0.15534	7	42	0.166667	6	25	0.24	3	36	0.0833333	0	0	43	0	0	48	0	0	24	0	0.0666667	2	20	0.1	0	14	0	1	11	0.0909091
chr1	136321019	-	T	chr1:136321019	Camsap2	SINE	Intron	intron_variant	0	0	136322113	1094	upstream	intronic	ADARB1	0.0331492	4	58	0.0689655	1	68	0.0147059	1	55	0.0181818	0	0	74	0	0	76	0	0	19	0	0	0	45	0	0	40	0	0	53	0
chr1	136321029	-	T	chr1:136321029	Camsap2	SINE	Intron	intron_variant	0	0	136322100	1071	upstream	intronic	ADAR	0.0638298	4	58	0.0689655	7	71	0.0985915	1	59	0.0169492	0	0	74	0	0	82	0	0	7	0	0.0416667	3	43	0.0697674	1	35	0.0285714	1	42	0.0238095
chr1	136321053	-	T	chr1:136321053	Camsap2	SINE	Intron	intron_variant	0	0	136320023	1030	downstream	Intron	ADAR	0.040201	3	62	0.0483871	4	72	0.0555556	1	65	0.0153846	0	0	76	0	0	84	0	0	42	0	0.0364964	2	47	0.0425532	2	43	0.0465116	1	47	0.0212766
chr1	136321076	-	T	chr1:136321076	Camsap2	SINE	Intron	intron_variant	0	0	136322061	985	upstream	intronic	ADARB1	0.0853081	5	66	0.0757576	12	76	0.157895	1	69	0.0144928	0	0	94	0	0	83	0	0	7	0	0	0	44	0	0	49	0	0	51	0
chr1	136321088	-	T	chr1:136321088	Camsap2	SINE	Intron	intron_variant	0	0	136322049	961	upstream	intronic	ADAR	0.0324074	4	65	0.0615385	3	78	0.0384615	0	73	0	0	0	99	0	0	86	0	0	25	0	0.00757576	1	40	0.025	0	45	0	0	47	0
chr1	136321092	-	T	chr1:136321092	Camsap2	SINE	Intron	intron_variant	0	0	136322045	953	upstream	intronic	ADAR	0.0717489	2	66	0.030303	9	81	0.111111	5	76	0.0657895	0	0	102	0	0	87	0	0	44	0	0.19708	9	41	0.219512	8	48	0.166667	10	48	0.208333
chr1	136321095	-	T	chr1:136321095	Camsap2	SINE	Intron	intron_variant	0	0	136322042	947	upstream	intronic	ADAR	0.713592	47	56	0.839286	55	76	0.723684	45	74	0.608108	0	0	98	0	0	82	0	0	36	0	0.625	26	37	0.702703	18	36	0.5	26	39	0.666667
chr1	136322044	-	T	chr1:136322044	Camsap2	SINE	Intron	intron_variant	0	0	136321093	951	downstream	intronic	ADAR	0.314286	2	13	0.153846	3	6	0.5	6	16	0.375	0	0	9	0	0	11	0	0	35	0	0.016129	1	27	0.037037	0	16	0	0	19	0
chr1	136322054	-	T	chr1:136322054	Camsap2	SINE	Intron	intron_variant	0	0	136321083	971	downstream	intronic	ADAR	0.244898	3	17	0.176471	6	15	0.4	3	17	0.176471	0	0	15	0	0	11	0	0	37	0	0.111111	5	29	0.172414	1	16	0.0625	1	18	0.0555556
chr1	136322058	-	T	chr1:136322058	Camsap2	SINE	Intron	intron_variant	0	0	136321078	980	downstream	intronic	ADAR	0.320755	3	17	0.176471	10	17	0.588235	4	19	0.210526	0	0	15	0	0	11	0	0	35	0	0.016129	1	29	0.0344828	0	15	0	0	18	0
chr1	136327739	-	T	chr1:136327739	Camsap2	.	Intron	intron_variant	0	0	136328062	323	upstream	intronic	ADARB1	0.0892857	2	20	0.1	1	12	0.0833333	2	24	0.0833333	0	0	19	0	0	25	0	0	25	0	0	0	5	0	0	7	0	0	12	0
chr1	136328081	-	T	chr1:136328081	Camsap2	.	Intron	intron_variant	0	0	136327717	364	downstream	intronic	ADARB1	0.0793651	4	20	0.2	0	18	0	1	25	0.04	0	0	16	0	0	15	0	0	31	0	0	0	14	0	0	17	0	0	13	0
chr1	13635000	-	T	chr1:13635000	Lactb2	SINE	Intron	non_coding_transcript_variant	0	0	13636417	1417	upstream	intronic	ADAR	0.166667	2	9	0.222222	3	10	0.3	0	11	0	0	0	6	0	0	8	0	0	12	0	0.0833333	0	9	0	2	10	0.2	0	5	0
chr1	136633596	+	A	chr1:136633596	Zfp281	SINE	intergenic	regulatory_region_variant	0	0	136633412	184	upstream	undefined	ADAR	0.32	1	9	0.111111	5	17	0.294118	10	24	0.416667	0	0	23	0	0	22	0	0	87	0	0.0512821	0	10	0	2	17	0.117647	0	12	0
chr1	136633617	+	A	chr1:136633617	Zfp281	SINE	intergenic	regulatory_region_variant	0	0	136633391	226	upstream	undefined	ADARB1	0.0925926	1	9	0.111111	0	16	0	4	29	0.137931	0	0	30	0	0	23	0	0	85	0	0	0	10	0	0	16	0	0	12	0
chr1	136643510	+	A	chr1:136643510	-	SINE	intergenic	intergenic_variant	0	0	136643279	231	upstream	undefined	ADARB1	0.588235	3	5	0.6	0	0	NA	7	12	0.583333	0	0	0	NA	0	1	0	0	89	0	0	0	2	0	0	1	0	0	4	0
chr1	137946651	+	A	chr1:137946651	Gm26936,Gm37534,Gm4258	SINE	Intron	non_coding_transcript_variant	0	0	137945923	728	upstream	intronic	ADARB1	0.023569	8	202	0.039604	4	180	0.0222222	2	212	0.00943396	0	0	148	0	0	164	0	0	88	0	0	0	146	0	0	128	0	0	151	0
chr1	139004982	+	A	chr1:139004982	Dennd1b	SINE	Intron	NMD_transcript_variant	0	0	-	-	-	-	ADARB1	0.23622	9	37	0.243243	9	46	0.195652	12	44	0.272727	0	0	36	0	0	40	0	0	86	0	0	0	13	0	0	7	0	0	10	0
chr1	139160308	+	A	chr1:139160308	Dennd1b,Gm37718	SINE	Intron	non_coding_transcript_variant	0	0	-	-	-	-	ADARB1	0.120879	8	46	0.173913	1	18	0.0555556	2	27	0.0740741	0	0	34	0	0	33	0	0	86	0	0	0	11	0	0	12	0	0	17	0
chr1	139160330	+	A	chr1:139160330	Dennd1b,Gm37718	SINE	Intron	non_coding_transcript_variant	0	0	139161394	1064	downstream	intronic	ADARB1	0.168317	7	47	0.148936	3	20	0.15	7	34	0.205882	0	0	37	0	0	32	0	0	88	0	0	0	11	0	0	13	0	0	13	0
chr1	139160333	+	A	chr1:139160333	Dennd1b,Gm37718	SINE	Intron	non_coding_transcript_variant	0	0	139161391	1058	downstream	intronic	ADAR	0.423077	19	48	0.395833	9	20	0.45	16	36	0.444444	0	0	38	0	0	28	0	0	15	0	0.075	0	12	0	3	15	0.2	0	13	0
chr1	139161388	+	A	chr1:139161388	Dennd1b,Gm37718	SINE	Intron	non_coding_transcript_variant	0	0	139160336	1052	upstream	intronic	ADAR	0.115385	1	13	0.0769231	0	4	0	2	9	0.222222	0	0	11	0	0	14	0	0	17	0	0.0357143	1	13	0.0769231	0	8	0	0	7	0
chr1	139161389	+	A	chr1:139161389	Dennd1b,Gm37718	SINE	Intron	non_coding_transcript_variant	0	0	139160335	1054	upstream	intronic	ADARB1	0.222222	4	13	0.307692	0	4	0	2	10	0.2	0	0	11	0	0	13	0	0	19	0	0	0	13	0	0	8	0	0	7	0
chr1	139161404	+	A	chr1:139161404	Dennd1b,Gm37718	SINE	Intron	non_coding_transcript_variant	0	0	139160320	1084	upstream	intronic	ADARB1	0.269231	2	12	0.166667	0	4	0	5	10	0.5	0	0	11	0	0	12	0	0	20	0	0	0	11	0	0	9	0	0	6	0
chr1	139161405	+	A	chr1:139161405	Dennd1b,Gm37718	SINE	Intron	non_coding_transcript_variant	0	0	139160319	1086	upstream	intronic	ADARB1	0.384615	4	12	0.333333	0	4	0	6	10	0.6	0	0	11	0	0	12	0	0	18	0	0	0	11	0	0	9	0	0	6	0
chr1	139161411	+	A	chr1:139161411	Dennd1b,Gm37718	SINE	Intron	non_coding_transcript_variant	0	0	139160313	1098	upstream	intronic	ADARB1	0.32	4	11	0.363636	0	4	0	4	10	0.4	0	0	10	0	0	10	0	0	13	0	0	0	10	0	0	8	0	0	6	0
chr1	139161412	+	A	chr1:139161412	Dennd1b,Gm37718	SINE	Intron	non_coding_transcript_variant	0	0	139160313	1099	upstream	intronic	ADARB1	0.166667	2	11	0.181818	0	3	0	2	10	0.2	0	0	9	0	0	12	0	0	20	0	0	0	10	0	0	7	0	0	5	0
chr1	139168661	+	A	chr1:139168661	Dennd1b	SINE	Intron	non_coding_transcript_variant	0	0	-	-	-	-	ADARB1	0.0632911	1	25	0.04	2	26	0.0769231	2	28	0.0714286	0	0	31	0	0	28	0	0	14	0	0	0	13	0	0	8	0	0	3	0
chr1	139176300	+	A	chr1:139176300	Dennd1b	LTR	intergenic	3_prime_UTR_variant	0	0	139177225	925	downstream	undefined	ADAR	0.382353	7	18	0.388889	2	22	0.0909091	17	28	0.607143	0	0	21	0	0	26	0	0	86	0	0.166667	0	6	0	2	5	0.4	1	7	0.142857
chr1	139176314	+	A	chr1:139176314	Dennd1b	LTR	intergenic	3_prime_UTR_variant	0	0	139177211	897	downstream	undefined	ADARB1	0.135135	6	18	0.333333	0	26	0	4	30	0.133333	0	0	22	0	0	26	0	0	24	0	0	0	8	0	0	5	0	0	7	0
chr1	139177204	+	A	chr1:139177204	Dennd1b	.	intergenic	3_prime_UTR_variant	0	0	-	-	-	-	ADAR	0.28	3	11	0.272727	3	9	0.333333	1	5	0.2	0	0	8	0	0	11	0	0	46	0	0.235294	0	4	0	3	6	0.5	1	7	0.142857
chr1	139177211	+	A	chr1:139177211	Dennd1b	.	intergenic	3_prime_UTR_variant	0	0	139176314	897	upstream	undefined	ADAR	0.173913	2	11	0.181818	2	8	0.25	0	4	0	0	0	8	0	0	11	0	0	51	0	0.0526316	0	4	0	0	6	0	1	9	0.111111
chr1	139177212	+	A	chr1:139177212	Dennd1b	.	intergenic	3_prime_UTR_variant	0	0	139176314	898	upstream	undefined	ADAR	0.217391	3	11	0.272727	2	8	0.25	0	4	0	0	0	8	0	0	11	0	0	51	0	0.210526	0	4	0	1	6	0.166667	3	9	0.333333
chr1	140391529	+	A	chr1:140391529	Kcnt2	LTR	Intron	intron_variant	0	0	-	-	-	-	ADARB1	0.075	2	15	0.133333	0	12	0	1	13	0.0769231	0	0	17	0	0	12	0	0	15	0	0	0	6	0	0	10	0	0	7	0
chr1	140391531	+	A	chr1:140391531	Kcnt2	LTR	Intron	intron_variant	0	0	-	-	-	-	ADAR	0.102564	2	15	0.133333	1	12	0.0833333	1	12	0.0833333	0	0	17	0	0	11	0	0	16	0	0.0434783	0	6	0	1	10	0.1	0	7	0
chr1	140394672	+	A	chr1:140394672	Kcnt2	LTR	Intron	intron_variant	0	0	-	-	-	-	ADARB1	0.16	1	6	0.166667	3	9	0.333333	0	10	0	0	0	7	0	0	10	0	0	12	0	0	0	4	0	0	3	0	0	3	0
chr1	140394687	+	A	chr1:140394687	Kcnt2	LTR	Intron	intron_variant	0	0	-	-	-	-	ADAR	0.304348	2	7	0.285714	3	8	0.375	2	8	0.25	0	0	6	0	0	12	0	0	12	0	0.125	1	3	0.333333	0	2	0	0	3	0
chr1	140394863	+	A	chr1:140394863	Kcnt2	LTR	Intron	intron_variant	0	0	-	-	-	-	ADARB1	0.45	5	12	0.416667	8	16	0.5	5	12	0.416667	0	0	13	0	0	12	0	0	10	0	0	0	1	0	0	3	0	0	2	0
chr1	140394882	+	A	chr1:140394882	Kcnt2	LTR	Intron	intron_variant	0	0	-	-	-	-	ADAR	0.3125	1	11	0.0909091	5	10	0.5	4	11	0.363636	0	0	10	0	0	11	0	0	10	0	0.2	0	1	0	1	2	0.5	0	2	0
chr1	140558092	+	A	chr1:140558092	Kcnt2	LTR	Intron	NMD_transcript_variant	0	0	140560021	1929	downstream	intronic	ADAR	0.192308	1	8	0.125	1	10	0.1	3	8	0.375	0	0	12	0	0	10	0	0	17	0	0.111111	0	4	0	1	3	0.333333	0	2	0
chr1	140558093	+	A	chr1:140558093	Kcnt2	LTR	Intron	NMD_transcript_variant	0	0	140560021	1928	downstream	intronic	ADARB1	0.2	0	8	0	3	10	0.3	2	7	0.285714	0	0	11	0	0	9	0	0	26	0	0	0	4	0	0	3	0	0	2	0
chr1	140558168	+	A	chr1:140558168	Kcnt2	LTR	Intron	NMD_transcript_variant	0	0	-	-	-	-	ADAR	0.323529	2	9	0.222222	3	9	0.333333	6	16	0.375	0	0	10	0	0	7	0	0	24	0	0.2	2	4	0.5	0	5	0	0	1	0
chr1	140558184	+	A	chr1:140558184	Kcnt2	LTR	Intron	NMD_transcript_variant	0	0	140559964	1780	downstream	intronic	ADAR	0.483871	5	8	0.625	5	9	0.555556	5	14	0.357143	0	0	10	0	0	4	0	0	11	0	0.3	1	3	0.333333	2	6	0.333333	0	1	0
chr1	140558188	+	A	chr1:140558188	Kcnt2	LTR	Intron	NMD_transcript_variant	0	0	140559965	1777	downstream	intronic	ADARB1	0.266667	3	8	0.375	2	8	0.25	3	14	0.214286	0	0	11	0	0	4	0	0	11	0	0	0	3	0	0	6	0	0	1	0
chr1	140558198	+	A	chr1:140558198	Kcnt2	LTR	Intron	NMD_transcript_variant	0	0	140559949	1751	downstream	intronic	ADAR	0.304348	1	3	0.333333	2	8	0.25	4	12	0.333333	0	0	11	0	0	1	0	0	11	0	0.125	0	2	0	1	6	0.166667	0	0	NA
chr1	140558214	+	A	chr1:140558214	Kcnt2	LTR	Intron	NMD_transcript_variant	0	0	140559935	1721	downstream	Intron	ADAR	0.0769231	0	4	0	1	9	0.111111	1	13	0.0769231	0	0	8	0	0	1	0	0	9	0	0.125	0	2	0	1	6	0.166667	0	0	NA
chr1	140559945	+	A	chr1:140559945	Kcnt2	LTR	Intron	NMD_transcript_variant	0	0	140558203	1742	upstream	intronic	ADAR	0.44	9	14	0.642857	0	5	0	2	6	0.333333	0	0	5	0	0	10	0	0	9	0	0.111111	0	4	0	1	1	1	0	4	0
chr1	140559946	+	A	chr1:140559946	Kcnt2	LTR	Intron	NMD_transcript_variant	0	0	140558202	1744	upstream	intronic	ADAR	0.192308	3	15	0.2	0	5	0	2	6	0.333333	0	0	5	0	0	10	0	0	5	0	0.125	0	4	0	1	1	1	0	3	0
chr1	140559947	+	A	chr1:140559947	Kcnt2	LTR	Intron	NMD_transcript_variant	0	0	140558201	1746	upstream	intronic	ADARB1	0.166667	2	13	0.153846	0	5	0	2	6	0.333333	0	0	5	0	0	10	0	0	8	0	0	0	4	0	0	1	0	0	3	0
chr1	140560015	+	A	chr1:140560015	Kcnt2	LTR	Intron	NMD_transcript_variant	0	0	140558101	1914	upstream	intronic	ADAR	0.708333	4	6	0.666667	9	11	0.818182	4	7	0.571429	0	0	9	0	0	15	0	0	11	0	0.0909091	1	5	0.2	0	2	0	0	4	0
chr1	140560037	+	A	chr1:140560037	Kcnt2	LTR	Intron	NMD_transcript_variant	0	0	-	-	-	-	ADARB1	0.363636	4	11	0.363636	4	15	0.266667	4	7	0.571429	0	0	11	0	0	14	0	0	7	0	0	0	6	0	0	2	0	0	7	0
chr1	140560038	+	A	chr1:140560038	Kcnt2	LTR	Intron	NMD_transcript_variant	0	0	-	-	-	-	ADARB1	0.205882	4	11	0.363636	2	15	0.133333	1	8	0.125	0	0	12	0	0	15	0	0	8	0	0	0	6	0	0	2	0	0	7	0
chr1	140560124	+	A	chr1:140560124	Kcnt2	LTR	Intron	NMD_transcript_variant	0	0	140557997	2127	upstream	intronic	ADARB1	0.142857	2	13	0.153846	0	12	0	3	10	0.3	0	0	14	0	0	9	0	0	9	0	0	0	7	0	0	1	0	0	9	0
chr1	14248863	-	T	chr1:14248863	Eya1	.	Intron	intron_variant	0	0	14247974	889	downstream	intronic	ADARB1	0.304348	2	13	0.153846	0	1	0	5	9	0.555556	0	0	6	0	0	17	0	0	6	0	0	0	1	0	0	1	0	0	2	0
chr1	14248870	-	T	chr1:14248870	Eya1	.	Intron	intron_variant	0	0	14247968	902	downstream	intronic	ADARB1	0.217391	0	13	0	2	2	1	3	8	0.375	0	0	7	0	0	16	0	0	4	0	0	0	1	0	0	1	0	0	2	0
chr1	143643092	-	T	chr1:143643092	B3galt2,Cdc73	.	Intron	intron_variant	0	0	143643523	431	upstream	intronic	ADARB1	0.181818	2	9	0.222222	2	10	0.2	2	14	0.142857	0	0	16	0	0	20	0	0	5	0	0	0	14	0	0	4	0	0	13	0
chr1	143643094	-	T	chr1:143643094	B3galt2,Cdc73	.	Intron	intron_variant	0	0	143643521	427	upstream	intronic	ADAR	0.28125	3	10	0.3	2	10	0.2	4	12	0.333333	0	0	19	0	0	23	0	0	7	0	0.03125	1	14	0.0714286	0	5	0	0	13	0
chr1	143643095	-	T	chr1:143643095	B3galt2,Cdc73	.	Intron	intron_variant	0	0	143643521	426	upstream	intronic	ADAR	0.451613	4	10	0.4	5	10	0.5	5	11	0.454545	0	0	19	0	0	24	0	0	8	0	0.225806	2	13	0.153846	1	5	0.2	4	13	0.307692
chr1	143643102	-	T	chr1:143643102	B3galt2,Cdc73	.	Intron	intron_variant	0	0	143643512	410	upstream	intronic	ADARB1	0.176471	1	11	0.0909091	2	12	0.166667	3	11	0.272727	0	0	20	0	0	24	0	0	6	0	0	0	14	0	0	6	0	0	13	0
chr1	143643105	-	T	chr1:143643105	B3galt2,Cdc73	.	Intron	intron_variant	0	0	143643508	403	upstream	intronic	ADAR	0.294118	2	10	0.2	4	13	0.307692	4	11	0.363636	0	0	21	0	0	23	0	0	6	0	0.0833333	2	14	0.142857	1	6	0.166667	0	16	0
chr1	143643106	-	T	chr1:143643106	B3galt2,Cdc73	.	Intron	intron_variant	0	0	143643508	402	upstream	intronic	ADARB1	0.205882	1	10	0.1	3	13	0.230769	3	11	0.272727	0	0	21	0	0	23	0	0	11	0	0	0	14	0	0	6	0	0	16	0
chr1	143643124	-	T	chr1:143643124	B3galt2,Cdc73	.	Intron	intron_variant	0	0	143643492	368	upstream	intronic	ADAR	0.232558	1	12	0.0833333	6	17	0.352941	3	14	0.214286	0	0	24	0	0	22	0	0	11	0	0.0833333	1	14	0.0714286	0	7	0	2	15	0.133333
chr1	143643588	-	T	chr1:143643588	B3galt2,Cdc73	.	Intron	intron_variant	0	0	-	-	-	-	ADAR	0.181818	3	10	0.3	2	5	0.4	1	18	0.0555556	0	0	3	0	0	12	0	0	11	0	0.151515	3	9	0.333333	0	16	0	2	8	0.25
chr1	143663144	-	T	chr1:143663144	Cdc73	SINE	Intron	non_coding_transcript_variant	0	0	-	-	-	-	ADAR	0.0666667	3	34	0.0882353	0	17	0	2	24	0.0833333	0	0	39	0	0	40	0	0	14	0	0.0285714	0	6	0	0	7	0	1	22	0.0454545
chr1	143676173	-	T	chr1:143676173	Cdc73	SINE	Intron	non_coding_transcript_variant	0	0	143676855	682	upstream	intronic	ADAR	0.247573	22	73	0.30137	16	62	0.258065	13	71	0.183099	0	0	76	0	0	42	0	0	14	0	0.045977	2	34	0.0588235	0	31	0	2	22	0.0909091
chr1	143676184	-	T	chr1:143676184	Cdc73	SINE	Intron	non_coding_transcript_variant	0	0	143676852	668	upstream	intronic	ADAR	0.0311111	1	77	0.012987	3	71	0.0422535	3	77	0.038961	0	0	82	0	0	46	0	0	14	0	0.0520833	0	36	0	3	35	0.0857143	2	25	0.08
chr1	143676185	-	T	chr1:143676185	Cdc73	SINE	Intron	non_coding_transcript_variant	0	0	143676852	667	upstream	intronic	ADARB1	0.0394737	3	79	0.0379747	2	72	0.0277778	4	77	0.0519481	0	0	85	0	0	46	0	0	5	0	0	0	35	0	0	37	0	0	25	0
chr1	143676851	-	T	chr1:143676851	Cdc73	SINE	Intron	non_coding_transcript_variant	0	0	143676185	666	downstream	intronic	ADARB1	0.2	1	10	0.1	5	18	0.277778	2	12	0.166667	0	0	18	0	0	13	0	0	9	0	0	0	7	0	0	4	0	0	4	0
chr1	143676861	-	T	chr1:143676861	Cdc73	SINE	Intron	non_coding_transcript_variant	0	0	143676175	686	downstream	intronic	ADAR	0.121951	1	11	0.0909091	4	18	0.222222	0	12	0	0	0	16	0	0	14	0	0	15	0	0.0625	0	7	0	1	5	0.2	0	4	0
chr1	143676862	-	T	chr1:143676862	Cdc73	SINE	Intron	non_coding_transcript_variant	0	0	143676174	688	downstream	intronic	ADAR	0.121951	1	11	0.0909091	4	19	0.210526	0	11	0	0	0	16	0	0	14	0	0	17	0	0.0555556	1	7	0.142857	0	7	0	0	4	0
chr1	143676875	-	T	chr1:143676875	Cdc73	SINE	Intron	non_coding_transcript_variant	0	0	143676161	714	downstream	intronic	ADARB1	0.173913	0	11	0	6	23	0.26087	2	12	0.166667	0	0	16	0	0	16	0	0	19	0	0	0	7	0	0	7	0	0	5	0
chr1	143676919	-	T	chr1:143676919	Cdc73	SINE	Intron	non_coding_transcript_variant	0	0	143676089	830	downstream	intronic	ADAR	0.160714	6	20	0.3	3	26	0.115385	0	10	0	0	0	29	0	0	11	0	0	19	0	0.025641	0	12	0	1	19	0.0526316	0	8	0
chr1	143697164	-	T	chr1:143697164	Cdc73	SINE	Intron	non_coding_transcript_variant	0	0	-	-	-	-	ADAR	0.0543478	2	20	0.1	0	30	0	3	42	0.0714286	0	0	44	0	0	29	0	0	19	0	0.0517241	3	20	0.15	0	19	0	0	19	0
chr1	143698549	-	T	chr1:143698549	Cdc73	.	Intron	non_coding_transcript_variant	0	0	-	-	-	-	ADARB1	0.0337079	2	28	0.0714286	0	22	0	1	39	0.025641	0	0	35	0	0	29	0	0	30	0	0	0	19	0	0	16	0	0	19	0
chr1	143755369	+	A	chr1:143755369	Trove2	SINE	UTR	3_prime_UTR_variant	0	0	143755651	282	downstream	UTR	ADAR	0.12963	0	11	0	4	20	0.2	3	23	0.130435	0	0	33	0	0	27	0	0	5	0	0.04	0	13	0	1	5	0.2	0	7	0
chr1	143755378	-	T	chr1:143755378	Trove2	SINE	UTR	3_prime_UTR_variant	1	1	143755754	376	upstream	UTR	ADAR	0.326531	3	11	0.272727	6	17	0.352941	7	21	0.333333	0	0	29	0	0	22	0	0	29	0	0.0833333	0	12	0	1	4	0.25	1	8	0.125
chr1	143755756	-	T	chr1:143755756	Trove2	SINE	UTR	3_prime_UTR_variant	0	0	143755376	380	downstream	UTR	ADARB1	0.056338	2	25	0.08	0	22	0	2	24	0.0833333	0	0	14	0	0	22	0	0	59	0	0	0	6	0	0	13	0	0	9	0
chr1	143755767	+	A	chr1:143755767	Trove2	SINE	UTR	3_prime_UTR_variant	0	0	143755366	401	upstream	UTR	ADAR	0.243243	8	27	0.296296	4	21	0.190476	6	26	0.230769	0	0	16	0	0	23	0	0	68	0	0.0666667	0	5	0	0	15	0	2	10	0.2
chr1	146461082	-	T	chr1:146461082	Gm29514	LINE	Intron	non_coding_transcript_variant	0	0	146458623	2459	downstream	intronic	ADARB1	0.121212	0	2	0	3	17	0.176471	1	14	0.0714286	0	0	6	0	0	4	0	0	68	0	0	0	10	0	0	14	0	0	3	0
chr1	146461090	-	T	chr1:146461090	Gm29514	LINE	Intron	non_coding_transcript_variant	0	0	146458615	2475	downstream	intronic	ADARB1	0.162162	1	5	0.2	4	16	0.25	1	16	0.0625	0	0	8	0	0	4	0	0	13	0	0	0	12	0	0	14	0	0	4	0
chr1	146461095	-	T	chr1:146461095	Gm29514	LINE	Intron	non_coding_transcript_variant	0	0	146458610	2485	downstream	intronic	ADAR	0.529412	2	5	0.4	10	15	0.666667	6	14	0.428571	0	0	9	0	0	4	0	0	15	0	0.0357143	0	12	0	0	12	0	1	4	0.25
chr1	146461106	-	T	chr1:146461106	Gm29514	LINE	Intron	non_coding_transcript_variant	0	0	146461660	554	upstream	intronic	ADARB1	0.142857	0	5	0	3	15	0.2	2	15	0.133333	0	0	9	0	0	5	0	0	16	0	0	0	13	0	0	12	0	0	5	0
chr1	146461116	-	T	chr1:146461116	Gm29514	LINE	Intron	non_coding_transcript_variant	0	0	-	-	-	-	ADARB1	0.125	1	20	0.05	6	19	0.315789	0	17	0	0	0	9	0	0	4	0	0	17	0	0	0	14	0	0	11	0	0	6	0
chr1	146461130	-	T	chr1:146461130	Gm29514	LINE	Intron	non_coding_transcript_variant	0	0	-	-	-	-	ADARB1	0.0847458	1	22	0.0454545	4	19	0.210526	0	18	0	0	0	8	0	0	4	0	0	30	0	0	0	16	0	0	14	0	0	6	0
chr1	146461674	-	T	chr1:146461674	Gm29514	LINE	Intron	non_coding_transcript_variant	0	0	-	-	-	-	ADARB1	0.139535	2	15	0.133333	5	25	0.2	5	46	0.108696	0	0	16	0	0	9	0	0	23	0	0	0	14	0	0	15	0	0	15	0
chr1	146462263	-	T	chr1:146462263	Gm29514	LINE	Intron	non_coding_transcript_variant	0	0	146460818	1445	downstream	intronic	ADAR	0.466667	3	5	0.6	2	6	0.333333	2	4	0.5	0	0	2	0	0	1	0	0	32	0	0.428571	1	3	0.333333	2	3	0.666667	0	1	0
chr1	146475497	-	T	chr1:146475497	Gm29514,Gm38187	SINE	Intron	non_coding_transcript_variant	0	0	-	-	-	-	ADARB1	0.0243902	1	45	0.0222222	1	41	0.0243902	1	37	0.027027	0	0	20	0	0	21	0	0	20	0	0	0	38	0	0	37	0	0	27	0
chr1	146475528	-	T	chr1:146475528	Gm29514,Gm38187	SINE	Intron	non_coding_transcript_variant	0	0	-	-	-	-	ADARB1	0.0479452	3	47	0.0638298	2	49	0.0408163	2	50	0.04	0	0	19	0	0	24	0	0	20	0	0	0	35	0	0	29	0	0	28	0
chr1	146538973	+	A	chr1:146538973	Brinp3	LINE	Intron	NMD_transcript_variant	0	0	-	-	-	-	ADARB1	0.0598291	0	26	0	4	48	0.0833333	3	43	0.0697674	0	0	20	0	0	28	0	0	23	0	0	0	23	0	0	22	0	0	26	0
chr1	146538978	+	A	chr1:146538978	Brinp3	LINE	Intron	NMD_transcript_variant	0	0	-	-	-	-	ADARB1	0.0683761	0	27	0	4	46	0.0869565	4	44	0.0909091	0	0	20	0	0	29	0	0	19	0	0	0	23	0	0	23	0	0	23	0
chr1	146539619	+	A	chr1:146539619	Brinp3	SINE	Intron	NMD_transcript_variant	0	0	146539977	358	downstream	intronic	ADARB1	0.0552147	3	28	0.107143	2	61	0.0327869	4	74	0.0540541	0	0	52	0	0	43	0	0	8	0	0	0	63	0	0	66	0	0	27	0
chr1	146539632	+	A	chr1:146539632	Brinp3	SINE	Intron	NMD_transcript_variant	0	0	146539964	332	downstream	intronic	ADAR	0.0505618	2	29	0.0689655	7	69	0.101449	0	80	0	0	0	55	0	0	47	0	0	7	0	0.00510204	1	79	0.0126582	0	76	0	0	41	0
chr1	146539993	+	A	chr1:146539993	Brinp3	SINE	Intron	NMD_transcript_variant	0	0	146539602	391	upstream	intronic	ADARB1	0.188525	8	29	0.275862	8	48	0.166667	7	45	0.155556	0	0	34	0	0	39	0	0	7	0	0	0	31	0	0	31	0	0	32	0
chr1	146540027	+	A	chr1:146540027	Brinp3	SINE	Intron	NMD_transcript_variant	0	0	146539569	458	upstream	intronic	ADAR	0.041958	3	26	0.115385	0	54	0	3	63	0.047619	0	0	34	0	0	45	0	0	10	0	0.010989	0	39	0	0	27	0	1	25	0.04
chr1	146540030	+	A	chr1:146540030	Brinp3	SINE	Intron	NMD_transcript_variant	0	0	146539566	464	upstream	intronic	ADAR	0.057971	2	26	0.0769231	2	52	0.0384615	4	60	0.0666667	0	0	36	0	0	44	0	0	12	0	0.0113636	1	37	0.027027	0	26	0	0	25	0
chr1	146545738	+	A	chr1:146545738	Brinp3	LINE	Intron	NMD_transcript_variant	0	0	146546404	666	downstream	intronic	ADAR	0.247093	30	135	0.222222	28	88	0.318182	27	121	0.22314	0	0	57	0	0	84	0	0	14	0	0.0888889	7	57	0.122807	7	56	0.125	2	67	0.0298507
chr1	146545828	+	A	chr1:146545828	Brinp3	LINE	Intron	NMD_transcript_variant	0	0	146546314	486	downstream	intronic	ADAR	0.0901961	7	85	0.0823529	6	80	0.075	10	90	0.111111	0	0	57	0	0	54	0	0	22	0	0.0138889	1	49	0.0204082	0	45	0	1	50	0.02
chr1	146545848	+	A	chr1:146545848	Brinp3	LINE	Intron	NMD_transcript_variant	0	0	146546295	447	downstream	intronic	ADAR	0.0634328	4	81	0.0493827	7	87	0.0804598	6	100	0.06	0	0	55	0	0	53	0	0	1	0	0.0359712	1	46	0.0217391	4	44	0.0909091	0	49	0
chr1	146545903	+	A	chr1:146545903	Brinp3	LINE	Intron	NMD_transcript_variant	0	0	146547940	2037	downstream	intronic	ADAR	0.166667	11	66	0.166667	10	64	0.15625	13	74	0.175676	0	0	39	0	0	43	0	0	39	0	0.015748	2	56	0.0357143	0	38	0	0	33	0
chr1	146545912	+	A	chr1:146545912	Brinp3	LINE	Intron	NMD_transcript_variant	0	0	146547929	2017	downstream	intronic	ADAR	0.253807	20	64	0.3125	13	61	0.213115	17	72	0.236111	0	0	40	0	0	42	0	0	42	0	0.00813008	0	53	0	1	38	0.0263158	0	32	0
chr1	146545916	+	A	chr1:146545916	Brinp3	LINE	Intron	NMD_transcript_variant	0	0	-	-	-	-	ADAR	0.484375	37	63	0.587302	21	59	0.355932	35	70	0.5	0	0	39	0	0	42	0	0	24	0	0.0406504	0	54	0	3	39	0.0769231	2	30	0.0666667
chr1	146547785	+	A	chr1:146547785	Brinp3	LINE	Intron	NMD_transcript_variant	0	0	-	-	-	-	ADARB1	0.0170455	1	91	0.010989	0	112	0	5	149	0.033557	0	0	81	0	0	79	0	0	24	0	0	0	72	0	0	84	0	0	69	0
chr1	146547862	+	A	chr1:146547862	Brinp3	LINE	Intron	NMD_transcript_variant	0	0	-	-	-	-	ADAR	0.272527	35	131	0.267176	34	144	0.236111	55	180	0.305556	0	0	101	0	0	112	0	0	68	0	0.075188	6	84	0.0714286	10	110	0.0909091	4	72	0.0555556
chr1	146547875	+	A	chr1:146547875	Brinp3	LINE	Intron	NMD_transcript_variant	0	0	-	-	-	-	ADARB1	0.043956	4	126	0.031746	5	144	0.0347222	11	185	0.0594595	0	0	102	0	0	111	0	0	70	0	0	0	81	0	0	109	0	0	71	0
chr1	146547876	+	A	chr1:146547876	Brinp3	LINE	Intron	NMD_transcript_variant	0	0	-	-	-	-	ADARB1	0.0321101	2	119	0.0168067	2	137	0.0145985	10	180	0.0555556	0	0	97	0	0	111	0	0	51	0	0	0	77	0	0	102	0	0	70	0
chr1	146547887	+	A	chr1:146547887	Brinp3	LINE	Intron	NMD_transcript_variant	0	0	-	-	-	-	ADARB1	0.0178218	2	149	0.0134228	5	162	0.0308642	2	194	0.0103093	0	0	111	0	0	110	0	0	61	0	0	0	79	0	0	112	0	0	74	0
chr1	146547896	+	A	chr1:146547896	Brinp3	LINE	Intron	NMD_transcript_variant	0	0	-	-	-	-	ADAR	0.0443548	8	142	0.056338	4	162	0.0246914	10	192	0.0520833	0	0	108	0	0	109	0	0	59	0	0.0290909	1	86	0.0116279	5	112	0.0446429	2	77	0.025974
chr1	146547932	+	A	chr1:146547932	Brinp3	LINE	Intron	NMD_transcript_variant	0	0	-	-	-	-	ADAR	0.0212314	4	161	0.0248447	0	139	0	6	171	0.0350877	0	0	93	0	0	90	0	0	68	0	0.00749064	0	74	0	2	122	0.0163934	0	71	0
chr1	146548744	+	A	chr1:146548744	Brinp3	LINE	Intron	NMD_transcript_variant	0	0	-	-	-	-	ADARB1	0.0588235	3	20	0.15	1	33	0.030303	1	32	0.03125	0	0	33	0	0	35	0	0	77	0	0	0	28	0	0	39	0	0	32	0
chr1	146549110	+	A	chr1:146549110	Brinp3	LINE	Intron	NMD_transcript_variant	0	0	-	-	-	-	ADAR	0.131868	3	22	0.136364	3	35	0.0857143	6	34	0.176471	0	0	33	0	0	21	0	0	79	0	0.0569948	6	72	0.0833333	3	61	0.0491803	2	60	0.0333333
chr1	146549115	+	A	chr1:146549115	Brinp3	LINE	Intron	NMD_transcript_variant	0	0	-	-	-	-	ADAR	0.197674	7	22	0.318182	4	33	0.121212	6	31	0.193548	0	0	31	0	0	19	0	0	52	0	0.233161	20	73	0.273973	9	60	0.15	16	60	0.266667
chr1	146549131	+	A	chr1:146549131	Brinp3	LINE	Intron	NMD_transcript_variant	0	0	-	-	-	-	ADAR	0.180556	4	19	0.210526	5	25	0.2	4	28	0.142857	0	0	22	0	0	17	0	0	52	0	0.0357143	1	67	0.0149254	1	47	0.0212766	4	54	0.0740741
chr1	146559317	+	A	chr1:146559317	Brinp3	LINE	Intron	NMD_transcript_variant	0	0	146561703	2386	downstream	intronic	ADAR	0.0952381	6	66	0.0909091	5	69	0.0724638	9	75	0.12	0	0	38	0	0	53	0	0	51	0	0.0258065	2	44	0.0454545	2	53	0.0377358	0	58	0
chr1	146561483	+	A	chr1:146561483	Brinp3	LINE	Intron	NMD_transcript_variant	0	0	146559538	1945	upstream	intronic	ADAR	0.0258303	0	80	0	1	87	0.0114943	6	104	0.0576923	0	0	50	0	0	76	0	0	87	0	0.0114068	2	89	0.0224719	0	101	0	1	73	0.0136986
chr1	146561740	+	A	chr1:146561740	Brinp3	LINE	Intron	NMD_transcript_variant	0	0	-	-	-	-	ADAR	0.0356164	7	107	0.0654206	2	116	0.0172414	4	142	0.028169	0	0	67	0	0	62	0	0	113	0	0.00512821	1	70	0.0142857	0	72	0	0	53	0
chr1	146561752	+	A	chr1:146561752	Brinp3	LINE	Intron	NMD_transcript_variant	0	0	-	-	-	-	ADAR	0.0463768	1	100	0.01	7	109	0.0642202	8	136	0.0588235	0	0	57	0	0	57	0	0	115	0	0.0366492	2	70	0.0285714	1	72	0.0138889	4	49	0.0816327
chr1	146561854	+	A	chr1:146561854	Brinp3	LINE	Intron	NMD_transcript_variant	0	0	146563796	1942	downstream	intronic	ADARB1	0.0309278	3	39	0.0769231	0	53	0	3	102	0.0294118	0	0	33	0	0	44	0	0	111	0	0	0	52	0	0	46	0	0	44	0
chr1	146562422	+	A	chr1:146562422	Brinp3	LINE	Intron	NMD_transcript_variant	0	0	-	-	-	-	ADARB1	0.0154799	1	132	0.00757576	0	96	0	4	95	0.0421053	0	0	54	0	0	69	0	0	126	0	0	0	48	0	0	59	0	0	43	0
chr1	146563085	+	A	chr1:146563085	Brinp3	LINE	Intron	NMD_transcript_variant	0	0	-	-	-	-	ADAR	0.0829016	4	60	0.0666667	9	73	0.123288	3	60	0.05	0	0	27	0	0	36	0	0	127	0	0.02	0	34	0	1	37	0.027027	1	29	0.0344828
chr1	146563194	+	A	chr1:146563194	Brinp3	LINE	Intron	NMD_transcript_variant	0	0	-	-	-	-	ADAR	0.0437956	2	51	0.0392157	2	40	0.05	2	46	0.0434783	0	0	23	0	0	28	0	0	111	0	0.00900901	1	28	0.0357143	0	41	0	0	42	0
chr1	146737661	+	A	chr1:146737661	Brinp3	LINE	Intron	NMD_transcript_variant	0	0	-	-	-	-	ADAR	0.0746269	0	18	0	2	22	0.0909091	3	27	0.111111	0	0	24	0	0	36	0	0	28	0	0.028169	1	20	0.05	0	28	0	1	23	0.0434783
chr1	146737677	+	A	chr1:146737677	Brinp3	LINE	Intron	NMD_transcript_variant	0	0	-	-	-	-	ADAR	0.0410959	0	18	0	2	27	0.0740741	1	28	0.0357143	0	0	27	0	0	35	0	0	17	0	0.0153846	1	18	0.0555556	0	24	0	0	23	0
chr1	146778300	+	A	chr1:146778300	Brinp3	LINE	Intron	NMD_transcript_variant	0	0	-	-	-	-	ADAR	0.173184	12	54	0.222222	8	45	0.177778	11	80	0.1375	0	0	23	0	0	56	0	0	17	0	0.0408163	2	29	0.0689655	1	38	0.0263158	1	31	0.0322581
chr1	146778371	+	A	chr1:146778371	Brinp3	LINE	Intron	NMD_transcript_variant	0	0	-	-	-	-	ADAR	0.049505	0	42	0	3	24	0.125	2	35	0.0571429	0	0	14	0	0	43	0	0	10	0	0.015625	1	17	0.0588235	0	25	0	0	22	0
chr1	149227083	-	T	chr1:149227083	-	LINE	intergenic	regulatory_region_variant	0	0	149226070	1013	downstream	undefined	ADARB1	0.125	1	4	0.25	0	3	0	1	9	0.111111	0	0	0	NA	0	4	0	0	71	0	0	0	7	0	0	5	0	0	4	0
chr1	149227153	-	T	chr1:149227153	-	LINE	intergenic	regulatory_region_variant	0	0	149225988	1165	downstream	undefined	ADARB1	0.238095	1	5	0.2	0	3	0	4	13	0.307692	0	0	4	0	0	14	0	0	96	0	0	0	9	0	0	3	0	0	3	0
chr1	149227158	-	T	chr1:149227158	-	LINE	intergenic	regulatory_region_variant	0	0	149225982	1176	downstream	undefined	ADAR	0.190476	0	5	0	1	3	0.333333	3	13	0.230769	0	0	4	0	0	15	0	0	89	0	0.266667	2	9	0.222222	2	3	0.666667	0	3	0
chr1	149227169	-	T	chr1:149227169	-	LINE	intergenic	regulatory_region_variant	0	0	-	-	-	-	ADARB1	0.4	1	4	0.25	0	3	0	7	13	0.538462	0	0	5	0	0	14	0	0	83	0	0	0	7	0	0	1	0	0	3	0
chr1	149227189	-	T	chr1:149227189	-	LINE	intergenic	regulatory_region_variant	0	0	-	-	-	-	ADARB1	0.277778	1	4	0.25	0	3	0	4	11	0.363636	0	0	7	0	0	20	0	0	57	0	0	0	7	0	0	1	0	0	3	0
chr1	149416166	-	T	chr1:149416166	Gm29398,Gm38189	LTR	intergenic	non_coding_transcript_variant	0	0	-	-	-	-	ADARB1	0.0307167	1	115	0.00869565	4	98	0.0408163	4	80	0.05	0	0	57	0	0	102	0	0	79	0	0	0	23	0	0	33	0	0	31	0
chr1	149419016	-	T	chr1:149419016	Gm29398	LTR	intergenic	non_coding_transcript_variant	0	0	-	-	-	-	ADARB1	0.0678733	0	71	0	5	70	0.0714286	10	80	0.125	0	0	51	0	0	84	0	0	45	0	0	0	13	0	0	4	0	0	10	0
chr1	149420148	-	T	chr1:149420148	Gm29398	LTR	intergenic	non_coding_transcript_variant	0	0	-	-	-	-	ADARB1	0.0454545	1	20	0.05	0	20	0	2	26	0.0769231	0	0	14	0	0	31	0	0	26	0	0	0	15	0	0	8	0	0	29	0
chr1	149420722	-	T	chr1:149420722	Gm29398	LTR	intergenic	non_coding_transcript_variant	0	0	-	-	-	-	ADAR	0.0491071	3	78	0.0384615	3	70	0.0428571	5	76	0.0657895	0	0	43	0	0	118	0	0	26	0	0.0196078	0	15	0	1	14	0.0714286	0	22	0
chr1	149427397	-	T	chr1:149427397	Gm29398,Gm37096	LTR	Intron	non_coding_transcript_variant	0	0	149425473	1924	downstream	intronic	ADARB1	0.0337838	2	49	0.0408163	2	55	0.0363636	1	44	0.0227273	0	0	38	0	0	103	0	0	26	0	0	0	16	0	0	19	0	0	37	0
chr1	149427401	-	T	chr1:149427401	Gm29398,Gm37096	LTR	Intron	non_coding_transcript_variant	0	0	149425470	1931	downstream	intronic	ADARB1	0.0612245	1	47	0.0212766	2	55	0.0363636	6	45	0.133333	0	0	36	0	0	101	0	0	30	0	0	0	15	0	0	15	0	0	32	0
chr1	149427429	-	T	chr1:149427429	Gm29398,Gm37096	LTR	Intron	non_coding_transcript_variant	0	0	-	-	-	-	ADARB1	0.0560748	3	29	0.103448	1	43	0.0232558	2	35	0.0571429	0	0	24	0	0	75	0	0	20	0	0	0	12	0	0	19	0	0	34	0
chr1	149427432	-	T	chr1:149427432	Gm29398,Gm37096	LTR	Intron	non_coding_transcript_variant	0	0	149425449	1983	downstream	exonic	ADARB1	0.047619	0	27	0	3	41	0.0731707	2	37	0.0540541	0	0	24	0	0	73	0	0	19	0	0	0	13	0	0	18	0	0	33	0
chr1	149427448	-	T	chr1:149427448	Gm29398,Gm37096	LTR	Intron	non_coding_transcript_variant	0	0	149425435	2013	downstream	exonic	ADARB1	0.14433	3	22	0.136364	7	41	0.170732	4	34	0.117647	0	0	22	0	0	68	0	0	13	0	0	0	16	0	0	17	0	0	30	0
chr1	149433911	-	T	chr1:149433911	Gm29398,Gm37096,Gm37775	LINE	Exon	non_coding_transcript_exon_variant	0	0	-	-	-	-	ADARB1	0.108108	3	16	0.1875	1	14	0.0714286	0	7	0	0	0	8	0	0	6	0	0	13	0	0	0	6	0	0	11	0	0	19	0
chr1	149433913	-	T	chr1:149433913	Gm29398,Gm37096,Gm37775	LINE	Exon	non_coding_transcript_exon_variant	0	0	-	-	-	-	ADARB1	0.181818	1	15	0.0666667	2	13	0.153846	3	5	0.6	0	0	8	0	0	5	0	0	14	0	0	0	6	0	0	11	0	0	18	0
chr1	149434089	-	T	chr1:149434089	Gm29398,Gm37096,Gm37775	LINE	Intron	non_coding_transcript_variant	0	0	-	-	-	-	ADAR	0.2125	7	26	0.269231	7	36	0.194444	3	18	0.166667	0	0	10	0	0	55	0	0	12	0	0.131148	0	13	0	2	19	0.105263	6	29	0.206897
chr1	149434220	-	T	chr1:149434220	Gm29398,Gm37096,Gm37775	LINE	Intron	non_coding_transcript_variant	0	0	-	-	-	-	ADAR	0.21118	15	50	0.3	12	62	0.193548	7	49	0.142857	0	0	24	0	0	74	0	0	94	0	0.0394737	0	13	0	1	20	0.05	2	43	0.0465116
chr1	149434224	-	T	chr1:149434224	Gm29398,Gm37096,Gm37775	LINE	Intron	non_coding_transcript_variant	0	0	-	-	-	-	ADARB1	0.0316456	0	52	0	2	60	0.0333333	3	46	0.0652174	0	0	29	0	0	74	0	0	73	0	0	0	13	0	0	18	0	0	42	0
chr1	149434393	-	T	chr1:149434393	Gm29398,Gm37096,Gm37775	LINE	Intron	non_coding_transcript_variant	0	0	-	-	-	-	ADARB1	0.0472441	0	35	0	1	46	0.0217391	5	46	0.108696	0	0	39	0	0	66	0	0	32	0	0	0	12	0	0	12	0	0	21	0
chr1	149435895	-	T	chr1:149435895	Gm29398,Gm37096,Gm37775	LINE	Exon	non_coding_transcript_exon_variant	0	0	-	-	-	-	ADARB1	0.0487805	3	38	0.0789474	3	55	0.0545455	0	30	0	0	0	24	0	0	70	0	0	61	0	0	0	19	0	0	7	0	0	20	0
chr1	149445136	-	T	chr1:149445136	Gm29398	LINE	Intron	non_coding_transcript_variant	0	0	149445988	852	upstream	intronic	ADAR	0.059633	3	83	0.0361446	3	73	0.0410959	7	62	0.112903	0	0	32	0	0	114	0	0	55	0	0.00925926	0	20	0	1	35	0.0285714	0	53	0
chr1	149445144	-	T	chr1:149445144	Gm29398	LINE	Intron	non_coding_transcript_variant	0	0	149445982	838	upstream	intronic	ADAR	0.0737327	5	85	0.0588235	7	73	0.0958904	4	59	0.0677966	0	0	35	0	0	109	0	0	55	0	0.0272727	0	19	0	3	36	0.0833333	0	55	0
chr1	149445178	-	T	chr1:149445178	Gm29398	LINE	Intron	non_coding_transcript_variant	0	0	149445947	769	upstream	intronic	ADAR	0.0590909	7	81	0.0864198	2	76	0.0263158	4	63	0.0634921	0	0	34	0	0	123	0	0	44	0	0.0272727	1	18	0.0555556	2	31	0.0645161	0	61	0
chr1	149445199	-	T	chr1:149445199	Gm29398	LINE	Intron	non_coding_transcript_variant	0	0	149445926	727	upstream	intronic	ADARB1	0.036036	3	77	0.038961	3	85	0.0352941	2	60	0.0333333	0	0	41	0	0	120	0	0	43	0	0	0	22	0	0	32	0	0	57	0
chr1	149445219	-	T	chr1:149445219	Gm29398	LINE	Intron	non_coding_transcript_variant	0	0	149445907	688	upstream	intronic	ADARB1	0.0686275	6	78	0.0769231	7	76	0.0921053	1	50	0.02	0	0	43	0	0	108	0	0	44	0	0	0	23	0	0	33	0	0	51	0
chr1	149445991	-	T	chr1:149445991	Gm29398	LINE	Intron	non_coding_transcript_variant	0	0	149445134	857	downstream	intronic	ADARB1	0.0327869	5	71	0.0704225	1	94	0.0106383	2	79	0.0253165	0	0	53	0	0	118	0	0	2	0	0	0	20	0	0	15	0	0	22	0
chr1	149446019	-	T	chr1:149446019	Gm29398	LINE	Intron	non_coding_transcript_variant	0	0	149445107	912	downstream	intronic	ADARB1	0.0262172	0	78	0	5	108	0.0462963	2	81	0.0246914	0	0	62	0	0	138	0	0	1	0	0	0	24	0	0	22	0	0	32	0
chr1	149446031	-	T	chr1:149446031	Gm29398	LINE	Intron	non_coding_transcript_variant	0	0	149445095	936	downstream	intronic	ADARB1	0.0408922	5	78	0.0641026	5	105	0.047619	1	86	0.0116279	0	0	65	0	0	126	0	0	28	0	0	0	22	0	0	21	0	0	32	0
chr1	149446092	-	T	chr1:149446092	Gm29398	LINE	Intron	non_coding_transcript_variant	0	0	-	-	-	-	ADAR	0.0714286	6	79	0.0759494	8	96	0.0833333	3	63	0.047619	0	0	60	0	0	108	0	0	53	0	0.0888889	4	29	0.137931	2	21	0.0952381	2	40	0.05
chr1	149446094	-	T	chr1:149446094	Gm29398	LINE	Intron	non_coding_transcript_variant	0	0	-	-	-	-	ADAR	0.0598291	4	77	0.0519481	4	92	0.0434783	6	65	0.0923077	0	0	59	0	0	109	0	0	57	0	0.152174	1	31	0.0322581	7	22	0.318182	6	39	0.153846
chr1	149446124	-	T	chr1:149446124	Gm29398	LINE	Intron	non_coding_transcript_variant	0	0	149444998	1126	downstream	intronic	ADAR	0.159204	6	63	0.0952381	21	84	0.25	5	54	0.0925926	0	0	49	0	0	105	0	0	34	0	0.209302	11	28	0.392857	6	22	0.272727	1	36	0.0277778
chr1	149446188	-	T	chr1:149446188	Gm29398	LINE	Intron	non_coding_transcript_variant	0	0	149444928	1260	downstream	intronic	ADAR	0.0612245	2	36	0.0555556	0	28	0	4	34	0.117647	0	0	24	0	0	60	0	0	34	0	0.05	2	28	0.0714286	1	18	0.0555556	1	34	0.0294118
chr1	150370216	-	T	chr1:150370216	BC003331	LINE	Intron	NMD_transcript_variant	0	0	150368704	1512	downstream	intronic	ADAR	0.1875	1	13	0.0769231	1	5	0.2	4	14	0.285714	0	0	25	0	0	17	0	0	57	0	0.272727	1	2	0.5	1	7	0.142857	1	2	0.5
chr1	150383734	-	T	chr1:150383734	BC003331	SINE	Intron	non_coding_transcript_variant	1	1	-	-	-	-	ADAR	0.255102	7	22	0.318182	8	46	0.173913	10	30	0.333333	0	0	56	0	0	34	0	0	56	0	0.24	2	7	0.285714	4	13	0.307692	0	5	0
chr1	150383769	-	T	chr1:150383769	BC003331	SINE	Intron	non_coding_transcript_variant	0	0	150384106	337	upstream	intronic	ADAR	0.395349	14	23	0.608696	10	40	0.25	10	23	0.434783	0	0	55	0	0	45	0	0	75	0	0.0588235	0	4	0	1	8	0.125	0	5	0
chr1	150383770	-	T	chr1:150383770	BC003331	SINE	Intron	non_coding_transcript_variant	0	0	150384106	336	upstream	intronic	ADARB1	0.0930233	1	22	0.0454545	5	41	0.121951	2	23	0.0869565	0	0	55	0	0	43	0	0	88	0	0	0	4	0	0	9	0	0	5	0
chr1	150383772	-	T	chr1:150383772	BC003331	SINE	Intron	non_coding_transcript_variant	0	0	150384104	332	upstream	intronic	ADARB1	0.0697674	0	21	0	2	40	0.05	4	25	0.16	0	0	53	0	0	43	0	0	80	0	0	0	3	0	0	8	0	0	5	0
chr1	150383808	-	T	chr1:150383808	BC003331	SINE	Intron	non_coding_transcript_variant	0	0	-	-	-	-	not known	0.175	5	29	0.172414	5	34	0.147059	4	17	0.235294	0.0196078	2	44	0.0454545	0	42	0	0	83	0	0.037037	0	8	0	0	10	0	1	9	0.111111
chr1	150383823	-	T	chr1:150383823	BC003331	SINE	Intron	non_coding_transcript_variant	0	0	150384062	239	upstream	intronic	ADAR	0.408451	7	22	0.318182	13	31	0.419355	9	18	0.5	0	0	39	0	0	40	0	0	94	0	0.0416667	0	7	0	1	9	0.111111	0	8	0
chr1	150384054	-	T	chr1:150384054	BC003331	SINE	Intron	non_coding_transcript_variant	1	1	-	-	-	-	ADARB1	0.108696	2	35	0.0571429	6	21	0.285714	2	36	0.0555556	0	0	32	0	0	26	0	0	87	0	0	0	17	0	0	18	0	0	8	0
chr1	150384142	-	T	chr1:150384142	BC003331	SINE	Intron	non_coding_transcript_variant	0	0	150383733	409	downstream	intronic	ADAR	0.045045	3	33	0.0909091	2	31	0.0645161	0	47	0	0	0	29	0	0	30	0	0	76	0	0.125	1	13	0.0769231	4	22	0.181818	0	5	0
chr1	150395748	+	A	chr1:150395748	BC003331,Tpr	SINE	Intron	intron_variant	0	0	150396954	1206	downstream	intronic	ADAR	0.244444	3	9	0.333333	3	20	0.15	5	16	0.3125	0	0	19	0	0	9	0	0	76	0	0.111111	1	9	0.111111	0	4	0	1	5	0.2
chr1	150395754	+	A	chr1:150395754	BC003331,Tpr	SINE	Intron	intron_variant	0	0	150396950	1196	downstream	intronic	ADARB1	0.0487805	1	6	0.166667	1	19	0.0526316	0	16	0	0	0	20	0	0	8	0	0	71	0	0	0	10	0	0	4	0	0	6	0
chr1	150395764	+	A	chr1:150395764	BC003331,Tpr	SINE	Intron	intron_variant	0	0	150397573	1809	downstream	intronic	ADARB1	0.190476	4	7	0.571429	3	20	0.15	1	15	0.0666667	0	0	21	0	0	8	0	0	37	0	0	0	7	0	0	4	0	0	6	0
chr1	150396942	+	A	chr1:150396942	BC003331,Tpr	SINE	Intron	intron_variant	0	0	150395762	1180	upstream	intronic	ADAR	0.260274	1	18	0.0555556	7	19	0.368421	11	36	0.305556	0	0	52	0	0	28	0	0	8	0	0.142857	4	15	0.266667	1	13	0.0769231	0	7	0
chr1	150396947	+	A	chr1:150396947	BC003331,Tpr	SINE	Intron	intron_variant	0	0	150395756	1191	upstream	intronic	ADAR	0.176471	2	16	0.125	3	18	0.166667	7	34	0.205882	0	0	53	0	0	31	0	0	20	0	0.0967742	3	13	0.230769	0	12	0	0	6	0
chr1	151329947	-	T	chr1:151329947	-	DNA	intergenic	intergenic_variant	0	0	-	-	-	-	ADARB1	1	1	1	1	8	8	1	2	2	1	0	0	0	NA	0	9	0	0	27	0	0	0	0	NA	0	0	NA	0	1	0
chr1	151329965	-	T	chr1:151329965	-	DNA	intergenic	intergenic_variant	0	0	-	-	-	-	ADARB1	0.727273	1	2	0.5	6	8	0.75	1	1	1	0	0	1	0	0	7	0	0	27	0	0	0	0	NA	0	0	NA	0	1	0
chr1	151331277	-	T	chr1:151331277	-	DNA	intergenic	intergenic_variant	0	0	-	-	-	-	ADARB1	0.363636	0	2	0	2	2	1	2	7	0.285714	0	0	9	0	0	5	0	0	27	0	0	0	4	0	0	0	NA	0	1	0
chr1	151366377	-	T	chr1:151366377	Ivns1abp,Swt1	SINE	intergenic	regulatory_region_variant	0	0	151365734	643	downstream	undefined	ADAR	0.0686275	4	31	0.129032	3	32	0.09375	0	39	0	0	0	29	0	0	31	0	0	15	0	0.0294118	0	15	0	0	12	0	1	7	0.142857
chr1	151377816	-	T	chr1:151377816	Swt1	SINE	Intron	NMD_transcript_variant	0	0	-	-	-	-	ADARB1	0.7	1	2	0.5	6	6	1	7	12	0.583333	0	0	17	0	0	8	0	0	14	0	0	0	2	0	0	3	0	0	3	0
chr1	151396831	-	T	chr1:151396831	Swt1	SINE	Intron	NMD_transcript_variant	0	0	151396975	144	upstream	intronic	ADAR	1	3	3	1	3	3	1	3	3	1	0	0	6	0	0	10	0	0	16	NA	1	1	1	1	0	0	NA	0	0	NA
chr1	151400375	-	T	chr1:151400375	Swt1	SINE	Intron	NMD_transcript_variant	0	0	151402408	2033	upstream	intronic	ADARB1	0.0357143	1	24	0.0416667	0	19	0	2	41	0.0487805	0	0	27	0	0	29	0	0	18	0	0	0	12	0	0	10	0	0	5	0
chr1	151400452	-	T	chr1:151400452	Swt1	SINE	Intron	NMD_transcript_variant	0	0	-	-	-	-	ADAR	0.0606061	1	23	0.0434783	2	14	0.142857	1	29	0.0344828	0	0	21	0	0	20	0	0	18	0	0.107143	0	13	0	3	9	0.333333	0	6	0
chr1	151405916	-	T	chr1:151405916	Swt1	SINE	Intron	NMD_transcript_variant	0	0	-	-	-	-	ADAR	0.0895522	1	13	0.0769231	3	24	0.125	2	30	0.0666667	0	0	20	0	0	30	0	0	20	0	0.06	2	22	0.0909091	1	17	0.0588235	0	11	0
chr1	151444956	+	A	chr1:151444956	Gm37893,Mir7682,Trmt1l	SINE	Intron	non_coding_transcript_variant	1	1	-	-	-	-	ADAR	0.115044	3	43	0.0697674	4	38	0.105263	6	32	0.1875	0	0	9	0	0	12	0	0	26	0	0.0625	2	14	0.142857	0	6	0	0	12	0
chr1	151445000	+	A	chr1:151445000	Gm37893,Mir7682,Trmt1l	SINE	Intron	non_coding_transcript_variant	0	0	151442833	2167	upstream	intronic	ADARB1	0.0378788	2	40	0.05	2	39	0.0512821	1	53	0.0188679	0	0	6	0	0	6	0	0	27	0	0	0	15	0	0	5	0	0	15	0
chr1	151477787	-	T	chr1:151477787	Rnf2	.	Intron	intron_variant	0	0	151478311	524	upstream	intronic	ADARB1	0.241379	0	3	0	4	6	0.666667	3	20	0.15	0	0	23	0	0	12	0	0	5	0	0	0	9	0	0	11	0	0	6	0
chr1	151489593	-	T	chr1:151489593	Rnf2	SINE	Intron	intron_variant	0	0	151490597	1004	upstream	intronic	ADAR	0.0740741	0	13	0	3	20	0.15	1	21	0.047619	0	0	28	0	0	17	0	0	5	0	0.0344828	2	28	0.0714286	0	20	0	0	10	0
chr1	151491710	-	T	chr1:151491710	Gm36527,Rnf2	SINE	Intron	intron_variant	0	0	-	-	-	-	ADAR	0.040404	3	33	0.0909091	1	39	0.025641	0	27	0	0	0	55	0	0	35	0	0	1	0	0.0172414	1	20	0.05	0	20	0	0	18	0
chr1	151909610	-	T	chr1:151909610	1700025G04Rik	SINE	Intron	non_coding_transcript_variant	0	0	151908270	1340	downstream	intronic	ADARB1	0.171875	1	25	0.04	4	19	0.210526	6	20	0.3	0	0	10	0	0	9	0	0	20	0	0	0	17	0	0	17	0	0	6	0
chr1	151927695	-	T	chr1:151927695	1700025G04Rik	LTR	Intron	regulatory_region_variant	0	0	151927997	302	upstream	intronic	ADARB1	0.0384615	1	29	0.0344828	2	16	0.125	0	33	0	0	0	12	0	0	13	0	0	2	0	0	0	15	0	0	20	0	0	13	0
chr1	151927715	-	T	chr1:151927715	1700025G04Rik	LTR	Intron	regulatory_region_variant	0	0	-	-	-	-	ADARB1	0.310811	7	29	0.241379	5	15	0.333333	11	30	0.366667	0	0	10	0	0	15	0	0	0	0	0	0	16	0	0	20	0	0	15	0
chr1	151927719	-	T	chr1:151927719	1700025G04Rik	LTR	Intron	regulatory_region_variant	0	0	151927974	255	upstream	intronic	ADAR	0.0540541	0	28	0	2	14	0.142857	2	32	0.0625	0	0	10	0	0	15	0	0	20	0	0.0208333	0	16	0	1	17	0.0588235	0	15	0
chr1	151927725	-	T	chr1:151927725	1700025G04Rik	LTR	Intron	regulatory_region_variant	0	0	151927968	243	upstream	intronic	ADAR	0.0410959	0	29	0	2	13	0.153846	1	31	0.0322581	0	0	10	0	0	17	0	0	23	0	0.0392157	1	18	0.0555556	1	18	0.0555556	0	15	0
chr1	152043102	-	T	chr1:152043102	1700025G04Rik	.	Intron	NMD_transcript_variant	0	0	152041676	1426	downstream	intronic	ADARB1	0.0240964	1	23	0.0434783	1	28	0.0357143	0	32	0	0	0	6	0	0	19	0	0	8	0	0	0	23	0	0	19	0	0	20	0
chr1	152052769	-	T	chr1:152052769	1700025G04Rik	.	Intron	NMD_transcript_variant	0	0	-	-	-	-	ADARB1	0.0843373	5	26	0.192308	0	29	0	2	28	0.0714286	0	0	10	0	0	24	0	0	9	0	0	0	18	0	0	18	0	0	26	0
chr1	152052990	-	T	chr1:152052990	1700025G04Rik	.	Intron	NMD_transcript_variant	0	0	152052734	256	downstream	intronic	ADARB1	0.028436	4	56	0.0714286	0	79	0	2	76	0.0263158	0	0	20	0	0	36	0	0	13	0	0	0	17	0	0	31	0	0	20	0
chr1	152744304	-	T	chr1:152744304	Gm28792,Rgl1	SINE	Intron	non_coding_transcript_variant	0	0	-	-	-	-	ADARB1	0.0793651	1	28	0.0357143	1	16	0.0625	3	19	0.157895	0	0	12	0	0	15	0	0	9	0	0	0	13	0	0	3	0	0	2	0
chr1	152771863	+	A	chr1:152771863	Arpc5	SINE	Intron	non_coding_transcript_variant	0	0	152773174	1311	downstream	intronic	ADARB1	0.315789	2	12	0.166667	0	1	0	4	6	0.666667	0	0	20	0	0	8	0	0	21	0	0	0	8	0	0	8	0	0	5	0
chr1	152773176	+	A	chr1:152773176	Arpc5	SINE	Intron	non_coding_transcript_variant	0	0	152771861	1315	upstream	intronic	ADARB1	0.176471	5	22	0.227273	5	23	0.217391	2	23	0.0869565	0	0	62	0	0	22	0	0	23	0	0	0	11	0	0	12	0	0	6	0
chr1	152889814	-	T	chr1:152889814	Smg7	SINE	Intron	regulatory_region_variant	0	0	-	-	-	-	ADARB1	0.0348837	4	51	0.0784314	0	55	0	2	66	0.030303	0	0	63	0	0	52	0	0	36	0	0	0	20	0	0	10	0	0	8	0
chr1	152889821	-	T	chr1:152889821	Smg7	SINE	Intron	regulatory_region_variant	0	0	152891746	1925	upstream	intronic	ADARB1	0.0833333	5	47	0.106383	4	56	0.0714286	5	65	0.0769231	0	0	63	0	0	54	0	0	42	0	0	0	21	0	0	10	0	0	7	0
chr1	152889866	-	T	chr1:152889866	Smg7	SINE	Intron	regulatory_region_variant	0	0	152887424	2442	downstream	intronic	ADARB1	0.0314465	0	34	0	1	63	0.015873	4	62	0.0645161	0	0	59	0	0	73	0	0	35	0	0	0	20	0	0	19	0	0	15	0
chr1	152889875	-	T	chr1:152889875	Smg7	SINE	Intron	regulatory_region_variant	0	0	152887414	2461	downstream	intronic	ADAR	0.189873	9	38	0.236842	13	61	0.213115	8	59	0.135593	0	0	70	0	0	73	0	0	34	0	0.275862	7	21	0.333333	8	21	0.380952	1	16	0.0625
chr1	152891754	-	T	chr1:152891754	Smg7	SINE	Intron	intron_variant	0	0	-	-	-	-	ADARB1	0.142857	4	11	0.363636	0	10	0	1	14	0.0714286	0	0	5	0	0	6	0	0	34	0	0	0	6	0	0	9	0	0	6	0
chr1	152977566	+	A	chr1:152977566	Nmnat2	LTR	Intron	non_coding_transcript_variant	0	0	-	-	-	-	ADAR	0.0210084	4	95	0.0421053	1	70	0.0142857	0	73	0	0	0	38	0	0	50	0	0	11	0	0.0322581	1	52	0.0192308	2	34	0.0588235	1	38	0.0263158
chr1	152977567	+	A	chr1:152977567	Nmnat2	LTR	Intron	non_coding_transcript_variant	0	0	-	-	-	-	ADAR	0.0696721	7	98	0.0714286	4	71	0.056338	6	75	0.08	0	0	39	0	0	51	0	0	23	0	0.104	4	52	0.0769231	4	35	0.114286	5	38	0.131579
chr1	152977573	+	A	chr1:152977573	Nmnat2	LTR	Intron	non_coding_transcript_variant	0	0	-	-	-	-	ADAR	0.15261	11	96	0.114583	16	76	0.210526	11	77	0.142857	0	0	40	0	0	54	0	0	25	0	0.137097	4	50	0.08	8	35	0.228571	5	39	0.128205
chr1	152977581	+	A	chr1:152977581	Nmnat2	LTR	Intron	non_coding_transcript_variant	0	0	-	-	-	-	ADARB1	0.0572687	4	87	0.045977	5	72	0.0694444	4	68	0.0588235	0	0	36	0	0	51	0	0	12	0	0	0	49	0	0	33	0	0	36	0
chr1	152977816	+	A	chr1:152977816	Nmnat2	LTR	Intron	non_coding_transcript_variant	0	0	-	-	-	-	ADARB1	0.042735	1	44	0.0227273	4	30	0.133333	0	43	0	0	0	33	0	0	19	0	0	6	0	0	0	44	0	0	40	0	0	34	0
chr1	152988747	+	A	chr1:152988747	Nmnat2	LTR	Intron	regulatory_region_variant	0	0	-	-	-	-	ADARB1	0.122034	10	89	0.11236	12	83	0.144578	14	123	0.113821	0	0	82	0	0	53	0	0	29	0	0	0	39	0	0	47	0	0	43	0
chr1	152993413	+	A	chr1:152993413	Nmnat2	DNA	Intron	non_coding_transcript_variant	0	0	-	-	-	-	ADAR	0.0383275	5	71	0.0704225	4	109	0.0366972	2	107	0.0186916	0	0	93	0	0	84	0	0	52	0	0.00662252	0	103	0	0	95	0	2	104	0.0192308
chr1	153010215	+	A	chr1:153010215	Nmnat2	SINE	Intron	regulatory_region_variant	0	0	-	-	-	-	ADAR	0.0434783	1	35	0.0285714	2	45	0.0444444	3	58	0.0517241	0	0	39	0	0	30	0	0	53	0	0.00465116	0	67	0	1	84	0.0119048	0	64	0
chr1	153020437	+	A	chr1:153020437	Nmnat2	SINE	Intron	regulatory_region_variant	0	0	-	-	-	-	ADAR	0.383562	29	81	0.358025	31	88	0.352273	52	123	0.422764	0	0	72	0	0	66	0	0	50	0	0.125	7	78	0.0897436	16	84	0.190476	7	78	0.0897436
chr1	153020484	+	A	chr1:153020484	Nmnat2	SINE	Intron	regulatory_region_variant	0	0	-	-	-	-	ADAR	0.026936	4	93	0.0430108	0	102	0	4	102	0.0392157	0	0	77	0	0	55	0	0	46	0	0.0212014	1	96	0.0104167	5	101	0.049505	0	86	0
chr1	153020767	+	A	chr1:153020767	Nmnat2	SINE	Intron	regulatory_region_variant	0	0	-	-	-	-	ADARB1	0.05	1	23	0.0434783	2	29	0.0689655	1	28	0.0357143	0	0	26	0	0	17	0	0	4	0	0	0	33	0	0	40	0	0	30	0
chr1	153037033	+	A	chr1:153037033	Nmnat2	SINE	Intron	non_coding_transcript_variant	0	0	-	-	-	-	ADARB1	0.0249221	1	102	0.00980392	3	101	0.029703	4	118	0.0338983	0	0	73	0	0	70	0	0	52	0	0	0	40	0	0	44	0	0	31	0
chr1	153037038	+	A	chr1:153037038	Nmnat2	SINE	Intron	non_coding_transcript_variant	0	0	-	-	-	-	ADARB1	0.0575758	5	108	0.0462963	6	104	0.0576923	8	118	0.0677966	0	0	76	0	0	68	0	0	52	0	0	0	43	0	0	46	0	0	31	0
chr1	153041632	+	A	chr1:153041632	Nmnat2	SINE	Intron	non_coding_transcript_variant	0	0	-	-	-	-	ADAR	0.047619	3	44	0.0681818	2	66	0.030303	4	79	0.0506329	0	0	54	0	0	54	0	0	50	0	0.00970874	0	40	0	0	41	0	1	22	0.0454545
chr1	153055679	+	A	chr1:153055679	Nmnat2	SINE	Intron	non_coding_transcript_variant	0	0	-	-	-	-	ADAR	0.056338	2	29	0.0689655	0	20	0	2	22	0.0909091	0	0	17	0	0	28	0	0	48	0	0.115385	1	9	0.111111	1	11	0.0909091	1	6	0.166667
chr1	153055738	+	A	chr1:153055738	Nmnat2	SINE	Intron	non_coding_transcript_variant	0	0	153056868	1130	downstream	intronic	ADARB1	0.127451	4	42	0.0952381	7	24	0.291667	2	36	0.0555556	0	0	21	0	0	37	0	0	29	0	0	0	11	0	0	10	0	0	6	0
chr1	153055741	+	A	chr1:153055741	Nmnat2	SINE	Intron	non_coding_transcript_variant	0	0	153056866	1125	downstream	intronic	ADAR	0.135922	6	42	0.142857	5	24	0.208333	3	37	0.0810811	0	0	19	0	0	36	0	0	71	0	0.107143	1	11	0.0909091	1	11	0.0909091	1	6	0.166667
chr1	153055742	+	A	chr1:153055742	Nmnat2	SINE	Intron	non_coding_transcript_variant	0	0	153056862	1120	downstream	intronic	ADAR	0.0576923	2	42	0.047619	2	24	0.0833333	2	38	0.0526316	0	0	18	0	0	35	0	0	102	0	0.0357143	1	11	0.0909091	0	10	0	0	7	0
chr1	153056848	+	A	chr1:153056848	Nmnat2	SINE	Intron	non_coding_transcript_variant	0	0	153055758	1090	upstream	intronic	ADAR	0.653846	11	21	0.52381	17	25	0.68	23	32	0.71875	0	0	13	0	0	16	0	0	33	0	0.346154	2	7	0.285714	5	13	0.384615	2	6	0.333333
chr1	153071290	+	A	chr1:153071290	Gm28960,Nmnat2	LTR	Intron	non_coding_transcript_variant	0	0	-	-	-	-	ADAR	0.0875	3	34	0.0882353	3	50	0.06	8	76	0.105263	0	0	32	0	0	39	0	0	86	0	0.0515464	1	28	0.0357143	1	38	0.0263158	3	31	0.0967742
chr1	153071332	+	A	chr1:153071332	Gm28960,Nmnat2	LTR	Intron	non_coding_transcript_variant	0	0	-	-	-	-	ADAR	0.111842	7	33	0.212121	4	49	0.0816327	6	70	0.0857143	0	0	29	0	0	40	0	0	84	0	0.0337079	1	28	0.0357143	2	29	0.0689655	0	32	0
chr1	153086598	+	A	chr1:153086598	Gm28960,Nmnat2	Low	Intron	non_coding_transcript_variant	0	0	153088634	2036	downstream	intronic	ADARB1	0.0545455	1	23	0.0434783	1	10	0.1	1	22	0.0454545	0	0	4	0	0	10	0	0	32	0	0	0	16	0	0	8	0	0	19	0
chr1	153097640	+	A	chr1:153097640	Nmnat2	SINE	Intron	NMD_transcript_variant	0	0	-	-	-	-	ADARB1	0.0416667	1	36	0.0277778	1	25	0.04	2	35	0.0571429	0	0	41	0	0	32	0	0	106	0	0	0	23	0	0	17	0	0	17	0
chr1	153097685	+	A	chr1:153097685	Nmnat2	SINE	Intron	NMD_transcript_variant	0	0	-	-	-	-	ADARB1	0.0470588	2	34	0.0588235	1	22	0.0454545	1	29	0.0344828	0	0	34	0	0	29	0	0	107	0	0	0	25	0	0	20	0	0	24	0
chr1	153097705	+	A	chr1:153097705	Nmnat2	SINE	Intron	NMD_transcript_variant	0	0	-	-	-	-	ADARB1	0.0746269	4	26	0.153846	0	17	0	1	24	0.0416667	0	0	25	0	0	27	0	0	56	0	0	0	22	0	0	15	0	0	26	0
chr1	153106102	+	A	chr1:153106102	Nmnat2	SINE	Intron	NMD_transcript_variant	0	0	-	-	-	-	ADARB1	0.0465116	1	36	0.0277778	1	68	0.0147059	6	68	0.0882353	0	0	37	0	0	38	0	0	14	0	0	0	34	0	0	35	0	0	13	0
chr1	153106121	+	A	chr1:153106121	Nmnat2	SINE	Intron	NMD_transcript_variant	0	0	-	-	-	-	ADARB1	0.0316456	1	38	0.0263158	2	59	0.0338983	2	61	0.0327869	0	0	34	0	0	33	0	0	25	0	0	0	29	0	0	34	0	0	16	0
chr1	153106137	+	A	chr1:153106137	Nmnat2	SINE	Intron	NMD_transcript_variant	0	0	-	-	-	-	ADAR	0.0864198	2	36	0.0555556	3	61	0.0491803	9	65	0.138462	0	0	41	0	0	36	0	0	27	0	0.0641026	1	28	0.0357143	2	30	0.0666667	2	20	0.1
chr1	153106229	+	A	chr1:153106229	Nmnat2	SINE	Intron	NMD_transcript_variant	0	0	-	-	-	-	ADARB1	0.0416667	1	61	0.0163934	1	51	0.0196078	6	80	0.075	0	0	47	0	0	37	0	0	27	0	0	0	43	0	0	32	0	0	37	0
chr1	153220698	-	T	chr1:153220698	Lamc1	.	UTR	3_prime_UTR_variant	0	0	-	-	-	-	not known	0	0	9	0	0	3	0	0	2	0	0.1	3	17	0.176471	1	12	0.0833333	0	18	0	0	0	4	0	0	3	0	0	4	0
chr1	153235866	-	T	chr1:153235866	Lamc1	LINE	Intron	regulatory_region_variant	0	0	-	-	-	-	ADARB1	0.0566038	1	12	0.0833333	0	18	0	2	23	0.0869565	0	0	14	0	0	9	0	0	50	0	0	0	13	0	0	3	0	0	10	0
chr1	153284632	-	T	chr1:153284632	Gm38009,Lamc1	LTR	Exon	non_coding_transcript_exon_variant	0	0	-	-	-	-	ADAR	0.0461538	0	11	0	1	15	0.0666667	2	39	0.0512821	0	0	18	0	0	20	0	0	56	0	0.0833333	1	7	0.142857	1	8	0.125	0	9	0
chr1	15332223	+	A	chr1:15332223	Kcnb2	LTR	Intron	intron_variant	0	0	-	-	-	-	ADAR	0.019802	3	154	0.0194805	2	181	0.0110497	5	170	0.0294118	0	0	174	0	0	144	0	0	132	0	0.00492611	2	114	0.0175439	0	132	0	0	160	0
chr1	153326742	-	T	chr1:153326742	Lamc1	SINE	Intron	regulatory_region_variant	0	0	153327175	433	upstream	intronic	ADARB1	0.0428571	2	27	0.0740741	0	18	0	1	25	0.04	0	0	21	0	0	12	0	0	14	0	0	0	13	0	0	19	0	0	11	0
chr1	153327189	-	T	chr1:153327189	Lamc1	SINE	Intron	intron_variant	0	0	153324857	2332	downstream	intronic	ADARB1	0.0675676	3	28	0.107143	2	24	0.0833333	0	22	0	0	0	17	0	0	23	0	0	38	0	0	0	16	0	0	12	0	0	20	0
chr1	153327204	-	T	chr1:153327204	Lamc1	SINE	Intron	intron_variant	0	0	153324842	2362	downstream	intronic	ADARB1	0.0972222	3	26	0.115385	4	24	0.166667	0	22	0	0	0	18	0	0	24	0	0	37	0	0	0	15	0	0	12	0	0	18	0
chr1	15336370	+	A	chr1:15336370	Kcnb2	LTR	Intron	intron_variant	0	0	-	-	-	-	ADARB1	0.0365591	5	176	0.0284091	5	159	0.0314465	7	130	0.0538462	0	0	139	0	0	134	0	0	140	0	0	0	43	0	0	63	0	0	50	0
chr1	15336374	+	A	chr1:15336374	Kcnb2	LTR	Intron	intron_variant	0	0	-	-	-	-	ADARB1	0.0424107	4	172	0.0232558	4	149	0.0268456	11	127	0.0866142	0	0	139	0	0	133	0	0	135	0	0	0	43	0	0	62	0	0	48	0
chr1	15336392	+	A	chr1:15336392	Kcnb2	LTR	Intron	intron_variant	0	0	-	-	-	-	ADARB1	0.123832	19	153	0.124183	26	150	0.173333	8	125	0.064	0	0	136	0	0	133	0	0	126	0	0	0	34	0	0	48	0	0	42	0
chr1	15339196	+	A	chr1:15339196	Kcnb2	LTR	Intron	intron_variant	0	0	-	-	-	-	ADARB1	0.0344828	2	66	0.030303	2	61	0.0327869	2	47	0.0425532	0	0	73	0	0	37	0	0	46	0	0	0	39	0	0	27	0	0	30	0
chr1	15339197	+	A	chr1:15339197	Kcnb2	LTR	Intron	intron_variant	0	0	-	-	-	-	ADAR	0.116959	7	64	0.109375	7	61	0.114754	6	46	0.130435	0	0	74	0	0	36	0	0	46	0	0.0103093	1	39	0.025641	0	26	0	0	32	0
chr1	15342925	+	A	chr1:15342925	Kcnb2	LINE	Intron	intron_variant	0	0	-	-	-	-	ADAR	0.0230906	6	199	0.0301508	3	175	0.0171429	4	189	0.021164	0	0	219	0	0	146	0	0	135	0	0.00389105	0	84	0	0	66	0	1	107	0.00934579
chr1	15343243	+	A	chr1:15343243	Kcnb2	LINE	Intron	intron_variant	0	0	-	-	-	-	ADARB1	0.0681818	2	16	0.125	0	14	0	1	14	0.0714286	0	0	10	0	0	18	0	0	9	0	0	0	28	0	0	20	0	0	39	0
chr1	153444746	+	A	chr1:153444746	Gm25588,Gm37669,Shcbp1l	SINE	Intron	intron_variant	0	0	-	-	-	-	ADARB1	0.111111	2	7	0.285714	1	19	0.0526316	1	10	0.1	0	0	13	0	0	10	0	0	32	0	0	0	1	0	0	1	0	0	0	NA
chr1	153444898	+	A	chr1:153444898	Gm25588,Gm37669,Shcbp1l	SINE	Intron	intron_variant	0	0	-	-	-	-	ADARB1	0.25	0	5	0	5	14	0.357143	1	5	0.2	0	0	8	0	0	1	0	0	56	0	0	0	3	0	0	1	0	0	2	0
chr1	15345663	+	A	chr1:15345663	Kcnb2	.	Intron	intron_variant	0	0	-	-	-	-	ADAR	0.0231405	6	225	0.0266667	8	203	0.0394089	0	177	0	0	0	175	0	0	170	0	0	112	0	0.0260223	2	66	0.030303	3	103	0.0291262	2	100	0.02
chr1	153531763	-	T	chr1:153531763	Npl	LTR	Intron	regulatory_region_variant	0	0	153530433	1330	downstream	intronic	ADARB1	0.138889	1	16	0.0625	2	7	0.285714	2	13	0.153846	0	0	16	0	0	8	0	0	53	0	0	0	5	0	0	1	0	0	2	0
chr1	15357033	+	A	chr1:15357033	Kcnb2	LTR	Intron	intron_variant	0	0	15357984	951	downstream	intronic	ADARB1	0.0418848	5	118	0.0423729	7	113	0.0619469	4	151	0.0264901	0	0	129	0	0	142	0	0	108	0	0	0	66	0	0	65	0	0	80	0
chr1	15357046	+	A	chr1:15357046	Kcnb2	.	Intron	intron_variant	0	0	15357971	925	downstream	intronic	ADARB1	0.0320856	5	137	0.0364964	1	101	0.00990099	6	136	0.0441176	0	0	123	0	0	135	0	0	109	0	0	0	68	0	0	70	0	0	89	0
chr1	15357047	+	A	chr1:15357047	Kcnb2	.	Intron	intron_variant	0	0	15357970	923	downstream	intronic	ADARB1	0.110215	19	136	0.139706	9	100	0.09	13	136	0.0955882	0	0	125	0	0	132	0	0	108	0	0	0	72	0	0	69	0	0	88	0
chr1	15357051	+	A	chr1:15357051	Kcnb2	.	Intron	intron_variant	0	0	15357967	916	downstream	intronic	ADARB1	0.0356234	5	144	0.0347222	3	102	0.0294118	6	147	0.0408163	0	0	125	0	0	138	0	0	115	0	0	0	76	0	0	76	0	0	97	0
chr1	15357948	+	A	chr1:15357948	Kcnb2	.	Intron	intron_variant	0	0	15357072	876	upstream	intronic	ADARB1	0.0598802	3	76	0.0394737	4	110	0.0363636	13	148	0.0878378	0	0	145	0	0	122	0	0	97	0	0	0	95	0	0	99	0	0	112	0
chr1	15357956	+	A	chr1:15357956	Kcnb2	.	Intron	intron_variant	0	0	15357061	895	upstream	intronic	ADARB1	0.0242424	3	71	0.0422535	1	109	0.00917431	4	150	0.0266667	0	0	152	0	0	124	0	0	99	0	0	0	103	0	0	98	0	0	110	0
chr1	153701268	+	A	chr1:153701268	Rgs8	.	intergenic	regulatory_region_variant	0	0	-	-	-	-	ADARB1	0.428571	1	1	1	3	6	0.5	2	7	0.285714	0	0	0	NA	0	7	0	0	45	0	0	0	3	0	0	0	NA	0	2	0
chr1	15372985	+	A	chr1:15372985	Kcnb2	LINE	Intron	intron_variant	0	0	-	-	-	-	ADAR	0.02849	2	89	0.0224719	4	127	0.0314961	4	135	0.0296296	0	0	108	0	0	68	0	0	78	0	0.017094	2	27	0.0740741	0	41	0	0	49	0
chr1	15419746	+	A	chr1:15419746	Kcnb2	LTR	Intron	intron_variant	0	0	-	-	-	-	ADAR	0.0252427	2	142	0.0140845	3	180	0.0166667	8	193	0.0414508	0	0	209	0	0	166	0	0	161	0	0.00617284	0	107	0	2	87	0.0229885	0	130	0
chr1	15419750	+	A	chr1:15419750	Kcnb2	LTR	Intron	intron_variant	0	0	-	-	-	-	ADAR	0.0292969	3	138	0.0217391	6	178	0.0337079	6	196	0.0306122	0	0	214	0	0	162	0	0	160	0	0.0120846	4	111	0.036036	0	89	0	0	131	0
chr1	15419751	+	A	chr1:15419751	Kcnb2	LTR	Intron	intron_variant	0	0	-	-	-	-	ADAR	0.156126	12	136	0.0882353	33	176	0.1875	34	194	0.175258	0	0	216	0	0	162	0	0	161	0	0.018018	1	114	0.00877193	4	89	0.0449438	1	130	0.00769231
chr1	15419824	+	A	chr1:15419824	Kcnb2	LTR	Intron	intron_variant	0	0	-	-	-	-	ADAR	0.0400616	8	213	0.0375587	9	205	0.0439024	9	231	0.038961	0	0	236	0	0	182	0	0	190	0	0.0108108	3	137	0.0218978	0	86	0	1	147	0.00680272
chr1	15420007	+	A	chr1:15420007	Kcnb2	LTR	Intron	intron_variant	0	0	-	-	-	-	ADAR	0.0386029	12	181	0.0662983	5	209	0.0239234	4	154	0.025974	0	0	233	0	0	175	0	0	189	0	0.0314465	5	103	0.0485437	5	101	0.049505	0	114	0
chr1	15425304	+	A	chr1:15425304	Kcnb2	LTR	Intron	intron_variant	0	0	-	-	-	-	ADARB1	0.020654	4	194	0.0206186	2	188	0.0106383	6	199	0.0301508	0	0	191	0	0	218	0	0	169	0	0	0	41	0	0	56	0	0	58	0
chr1	15425320	+	A	chr1:15425320	Kcnb2	LTR	Intron	intron_variant	0	0	-	-	-	-	ADAR	0.0410742	6	208	0.0288462	9	210	0.0428571	11	215	0.0511628	0	0	209	0	0	231	0	0	183	0	0.0276243	2	47	0.0425532	3	65	0.0461538	0	69	0
chr1	15425414	+	A	chr1:15425414	Kcnb2	LTR	Intron	intron_variant	0	0	-	-	-	-	ADARB1	0.0207006	5	224	0.0223214	3	208	0.0144231	5	196	0.0255102	0	0	203	0	0	214	0	0	177	0	0	0	54	0	0	75	0	0	77	0
chr1	15425443	+	A	chr1:15425443	Kcnb2	LTR	Intron	intron_variant	0	0	-	-	-	-	ADAR	0.0344828	0	180	0	10	185	0.0540541	8	157	0.0509554	0	0	188	0	0	202	0	0	164	0	0.0201005	3	62	0.0483871	0	69	0	1	68	0.0147059
chr1	15425459	+	A	chr1:15425459	Kcnb2	LTR	Intron	intron_variant	0	0	-	-	-	-	ADAR	0.0268817	0	206	0	10	181	0.0552486	5	171	0.0292398	0	0	191	0	0	202	0	0	178	0	0.0164609	1	77	0.012987	3	91	0.032967	0	75	0
chr1	15437117	+	A	chr1:15437117	Kcnb2	LTR	Intron	intron_variant	0	0	-	-	-	-	ADARB1	0.0311005	5	132	0.0378788	1	150	0.00666667	7	136	0.0514706	0	0	158	0	0	119	0	0	146	0	0	0	46	0	0	54	0	0	60	0
chr1	15442260	+	A	chr1:15442260	Kcnb2	SINE	Intron	intron_variant	0	0	-	-	-	-	ADARB1	0.0273556	1	107	0.00934579	0	116	0	8	106	0.0754717	0	0	117	0	0	104	0	0	89	0	0	0	88	0	0	82	0	0	118	0
chr1	154453675	-	T	chr1:154453675	Cacna1e	LINE	Intron	intron_variant	0	0	154454261	586	upstream	intronic	ADAR	0.153333	6	41	0.146341	7	36	0.194444	10	73	0.136986	0	0	71	0	0	78	0	0	58	0	0.015873	1	24	0.0416667	0	23	0	0	16	0
chr1	154453696	-	T	chr1:154453696	Cacna1e	LINE	Intron	intron_variant	0	0	154454240	544	upstream	intronic	ADAR	0.221519	9	43	0.209302	10	36	0.277778	16	79	0.202532	0	0	71	0	0	82	0	0	19	0	0.132075	4	21	0.190476	3	19	0.157895	0	13	0
chr1	154453709	-	T	chr1:154453709	Cacna1e	LINE	Intron	intron_variant	0	0	154454227	518	upstream	intronic	ADARB1	0.186747	3	38	0.0789474	10	40	0.25	18	88	0.204545	0	0	70	0	0	88	0	0	11	0	0	0	19	0	0	20	0	0	13	0
chr1	154453712	-	T	chr1:154453712	Cacna1e	LINE	Intron	intron_variant	0	0	154454224	512	upstream	intronic	ADARB1	0.0529801	1	28	0.0357143	4	40	0.1	3	83	0.0361446	0	0	64	0	0	84	0	0	10	0	0	0	19	0	0	14	0	0	11	0
chr1	154453720	-	T	chr1:154453720	Cacna1e	LINE	Intron	intron_variant	0	0	154454216	496	upstream	intronic	ADARB1	0.131579	4	28	0.142857	5	39	0.128205	11	85	0.129412	0	0	60	0	0	81	0	0	23	0	0	0	19	0	0	18	0	0	14	0
chr1	154453726	-	T	chr1:154453726	Cacna1e	LINE	Intron	intron_variant	0	0	154454210	484	upstream	intronic	ADARB1	0.0367647	1	24	0.0416667	1	37	0.027027	3	75	0.04	0	0	52	0	0	70	0	0	23	0	0	0	20	0	0	16	0	0	14	0
chr1	154454225	-	T	chr1:154454225	Cacna1e	LINE	Intron	intron_variant	0	0	154453711	514	downstream	intronic	ADARB1	0.0436681	6	90	0.0666667	2	67	0.0298507	2	72	0.0277778	0	0	76	0	0	79	0	0	10	0	0	0	53	0	0	48	0	0	35	0
chr1	154454236	-	T	chr1:154454236	Cacna1e	LINE	Intron	intron_variant	0	0	154453700	536	downstream	intronic	ADAR	0.411504	34	90	0.377778	25	63	0.396825	34	73	0.465753	0	0	78	0	0	79	0	0	2	0	0.00735294	1	55	0.0181818	0	47	0	0	34	0
chr1	154454242	-	T	chr1:154454242	Cacna1e	LINE	Intron	intron_variant	0	0	154453694	548	downstream	intronic	ADAR	0.423077	37	91	0.406593	25	66	0.378788	37	77	0.480519	0	0	83	0	0	88	0	0	9	0	0.0140845	1	57	0.0175439	1	48	0.0208333	0	37	0
chr1	154454247	-	T	chr1:154454247	Cacna1e	LINE	Intron	intron_variant	0	0	154453689	558	downstream	intronic	ADARB1	0.0600858	4	92	0.0434783	3	62	0.0483871	7	79	0.0886076	0	0	81	0	0	86	0	0	8	0	0	0	60	0	0	51	0	0	45	0
chr1	154454250	-	T	chr1:154454250	Cacna1e	LINE	Intron	intron_variant	0	0	154453686	564	downstream	intronic	ADARB1	0.0916667	10	99	0.10101	3	63	0.047619	9	78	0.115385	0	0	82	0	0	86	0	0	55	0	0	0	63	0	0	55	0	0	47	0
chr1	154454252	-	T	chr1:154454252	Cacna1e	LINE	Intron	intron_variant	0	0	154453684	568	downstream	intronic	ADARB1	0.0300429	2	97	0.0206186	5	61	0.0819672	0	75	0	0	0	79	0	0	83	0	0	64	0	0	0	62	0	0	54	0	0	45	0
chr1	154454262	-	T	chr1:154454262	Cacna1e	LINE	Intron	intron_variant	0	0	154453674	588	downstream	intronic	ADAR	0.2625	26	98	0.265306	15	62	0.241935	22	80	0.275	0	0	91	0	0	92	0	0	66	0	0.00598802	1	62	0.016129	0	58	0	0	47	0
chr1	154454270	-	T	chr1:154454270	Cacna1e	LINE	Intron	intron_variant	0	0	154453666	604	downstream	intronic	ADAR	0.131818	6	75	0.08	8	62	0.129032	15	83	0.180723	0	0	95	0	0	93	0	0	62	0	0.0144928	1	51	0.0196078	0	47	0	1	40	0.025
chr1	154454275	-	T	chr1:154454275	Cacna1e	LINE	Intron	intron_variant	0	0	154453662	613	downstream	intronic	ADARB1	0.0416667	1	68	0.0147059	1	65	0.0153846	7	83	0.0843373	0	0	92	0	0	94	0	0	62	0	0	0	48	0	0	44	0	0	41	0
chr1	154505700	-	T	chr1:154505700	Cacna1e	LINE	Intron	non_coding_transcript_variant	0	0	-	-	-	-	ADARB1	0.0503597	2	26	0.0769231	1	58	0.0172414	4	55	0.0727273	0	0	27	0	0	49	0	0	56	0	0	0	36	0	0	26	0	0	18	0
chr1	154506202	-	T	chr1:154506202	Cacna1e	LINE	Intron	non_coding_transcript_variant	0	0	-	-	-	-	ADARB1	0.0520231	6	59	0.101695	2	58	0.0344828	1	56	0.0178571	0	0	33	0	0	65	0	0	74	0	0	0	41	0	0	45	0	0	28	0
chr1	154506212	-	T	chr1:154506212	Cacna1e	LINE	Intron	non_coding_transcript_variant	0	0	-	-	-	-	ADARB1	0.0731707	8	50	0.16	3	58	0.0517241	1	56	0.0178571	0	0	30	0	0	62	0	0	77	0	0	0	40	0	0	44	0	0	25	0
chr1	154506213	-	T	chr1:154506213	Cacna1e	LINE	Intron	non_coding_transcript_variant	0	0	-	-	-	-	ADARB1	0.0654762	2	53	0.0377358	6	58	0.103448	3	57	0.0526316	0	0	31	0	0	61	0	0	76	0	0	0	40	0	0	44	0	0	27	0
chr1	154506924	-	T	chr1:154506924	Cacna1e	LINE	Intron	non_coding_transcript_variant	0	0	154508668	1744	upstream	intronic	ADAR	0.0382775	3	82	0.0365854	4	57	0.0701754	1	70	0.0142857	0	0	25	0	0	19	0	0	77	0	0.00724638	1	44	0.0227273	0	40	0	0	54	0
chr1	154506967	-	T	chr1:154506967	Cacna1e	LINE	Intron	non_coding_transcript_variant	0	0	154508625	1658	upstream	intronic	ADAR	0.124464	4	87	0.045977	11	59	0.186441	14	87	0.16092	0	0	22	0	0	25	0	0	79	0	0.0529412	0	62	0	2	46	0.0434783	7	62	0.112903
chr1	154507163	-	T	chr1:154507163	Cacna1e	LINE	Intron	non_coding_transcript_variant	0	0	154508427	1264	upstream	intronic	ADAR	0.132275	12	61	0.196721	10	64	0.15625	3	64	0.046875	0	0	39	0	0	58	0	0	80	0	0.0304878	1	52	0.0192308	1	57	0.0175439	3	55	0.0545455
chr1	154507229	-	T	chr1:154507229	Cacna1e	LINE	Intron	non_coding_transcript_variant	0	0	-	-	-	-	ADARB1	0.0463918	2	40	0.05	2	73	0.0273973	5	81	0.0617284	0	0	52	0	0	59	0	0	83	0	0	0	64	0	0	68	0	0	52	0
chr1	154507276	-	T	chr1:154507276	Cacna1e	LINE	Intron	non_coding_transcript_variant	0	0	154508320	1044	upstream	intronic	ADAR	0.038674	1	36	0.0277778	3	57	0.0526316	3	88	0.0340909	0	0	43	0	0	47	0	0	91	0	0.0538922	4	64	0.0625	4	55	0.0727273	1	48	0.0208333
chr1	154508675	-	T	chr1:154508675	Cacna1e	LINE	Intron	non_coding_transcript_variant	0	0	154506917	1758	downstream	intronic	ADARB1	0.175824	7	34	0.205882	4	29	0.137931	5	28	0.178571	0	0	28	0	0	37	0	0	93	0	0	0	29	0	0	21	0	0	26	0
chr1	154514197	-	T	chr1:154514197	Cacna1e	LINE	Intron	non_coding_transcript_variant	0	0	-	-	-	-	ADARB1	0.0322581	2	57	0.0350877	3	55	0.0545455	1	74	0.0135135	0	0	27	0	0	86	0	0	80	0	0	0	32	0	0	48	0	0	30	0
chr1	154734644	-	T	chr1:154734644	Cacna1e	SINE	Intron	non_coding_transcript_variant	0	0	-	-	-	-	ADAR	0.0316742	3	67	0.0447761	3	66	0.0454545	1	88	0.0113636	0	0	70	0	0	93	0	0	95	0	0.0625	3	49	0.0612245	3	53	0.0566038	3	42	0.0714286
chr1	154737522	-	T	chr1:154737522	Cacna1e	SINE	Intron	non_coding_transcript_variant	0	0	-	-	-	-	ADAR	0.0391061	0	99	0	8	124	0.0645161	6	135	0.0444444	0	0	108	0	0	126	0	0	87	0	0.00731707	1	152	0.00657895	0	132	0	2	126	0.015873
chr1	154780595	-	T	chr1:154780595	Cacna1e	DNA	Intron	non_coding_transcript_variant	0	0	-	-	-	-	ADARB1	0.0375	3	85	0.0352941	3	103	0.0291262	6	132	0.0454545	0	0	97	0	0	123	0	0	92	0	0	0	202	0	0	194	0	0	143	0
chr1	154780598	-	T	chr1:154780598	Cacna1e	DNA	Intron	non_coding_transcript_variant	0	0	-	-	-	-	ADARB1	0.0339506	3	85	0.0352941	2	107	0.0186916	6	132	0.0454545	0	0	101	0	0	125	0	0	54	0	0	0	202	0	0	192	0	0	144	0
chr1	154780604	-	T	chr1:154780604	Cacna1e	DNA	Intron	non_coding_transcript_variant	0	0	-	-	-	-	ADAR	0.0515759	2	88	0.0227273	11	120	0.0916667	5	141	0.035461	0	0	109	0	0	131	0	0	72	0	0.00382409	2	193	0.0103627	0	192	0	0	138	0
chr1	154780607	-	T	chr1:154780607	Cacna1e	DNA	Intron	non_coding_transcript_variant	0	0	-	-	-	-	ADARB1	0.0589812	8	89	0.0898876	9	127	0.0708661	5	157	0.0318471	0	0	105	0	0	138	0	0	74	0	0	0	188	0	0	189	0	0	135	0
chr1	154780613	-	T	chr1:154780613	Cacna1e	DNA	Intron	non_coding_transcript_variant	0	0	-	-	-	-	ADAR	0.0478723	4	90	0.0444444	10	122	0.0819672	4	164	0.0243902	0	0	116	0	0	143	0	0	73	0	0.00736648	3	197	0.0152284	1	198	0.00505051	0	148	0
chr1	154795175	-	T	chr1:154795175	Cacna1e	SINE	Intron	regulatory_region_variant	0	0	-	-	-	-	ADAR	0.0280899	1	110	0.00909091	1	107	0.00934579	8	139	0.057554	0	0	77	0	0	113	0	0	75	0	0.0340909	1	55	0.0181818	2	77	0.025974	3	44	0.0681818
chr1	154796660	-	T	chr1:154796660	Cacna1e	DNA	Intron	non_coding_transcript_variant	0	0	-	-	-	-	ADARB1	0.0265781	2	152	0.0131579	4	191	0.0209424	10	259	0.03861	0	0	121	0	0	146	0	0	58	0	0	0	83	0	0	79	0	0	82	0
chr1	154796756	-	T	chr1:154796756	Cacna1e	.	Intron	non_coding_transcript_variant	0	0	-	-	-	-	ADAR	0.026455	2	106	0.0188679	3	128	0.0234375	5	144	0.0347222	0	0	101	0	0	110	0	0	95	0	0.0687023	7	101	0.0693069	6	81	0.0740741	5	80	0.0625
chr1	154796757	-	T	chr1:154796757	Cacna1e	.	Intron	non_coding_transcript_variant	0	0	-	-	-	-	ADAR	0.0407125	1	107	0.00934579	8	136	0.0588235	7	150	0.0466667	0	0	112	0	0	113	0	0	104	0	0.0679245	7	103	0.0679612	6	80	0.075	5	82	0.0609756
chr1	154801833	-	T	chr1:154801833	Cacna1e	.	Intron	non_coding_transcript_variant	0	0	154801554	279	downstream	intronic	ADARB1	0.0447761	1	43	0.0232558	6	74	0.0810811	2	84	0.0238095	0	0	63	0	0	60	0	0	170	0	0	0	31	0	0	33	0	0	33	0
chr1	15484183	+	A	chr1:15484183	Kcnb2	LINE	Intron	intron_variant	0	0	-	-	-	-	ADAR	0.285714	8	35	0.228571	8	20	0.4	6	22	0.272727	0	0	25	0	0	18	0	0	24	0	0.174603	1	14	0.0714286	5	26	0.192308	5	23	0.217391
chr1	15484191	+	A	chr1:15484191	Kcnb2	LINE	Intron	intron_variant	0	0	-	-	-	-	ADAR	0.387097	15	33	0.454545	7	12	0.583333	2	17	0.117647	0	0	18	0	0	10	0	0	17	0	0.05	0	13	0	3	25	0.12	0	22	0
chr1	15486589	+	A	chr1:15486589	Kcnb2	LINE	Intron	intron_variant	0	0	-	-	-	-	ADAR	0.0864198	2	15	0.133333	0	15	0	5	51	0.0980392	0	0	25	0	0	36	0	0	39	0	0.0357143	0	12	0	0	19	0	2	25	0.08
chr1	15486613	+	A	chr1:15486613	Kcnb2	LINE	Intron	intron_variant	0	0	15484256	2357	upstream	intronic	ADAR	0.0833333	3	20	0.15	2	17	0.117647	2	47	0.0425532	0	0	31	0	0	36	0	0	42	0	0.123077	0	11	0	4	25	0.16	4	29	0.137931
chr1	15486614	+	A	chr1:15486614	Kcnb2	LINE	Intron	intron_variant	0	0	15484254	2360	upstream	intronic	ADAR	0.123596	4	22	0.181818	1	18	0.0555556	6	49	0.122449	0	0	28	0	0	35	0	0	41	0	0.09375	0	11	0	4	24	0.166667	2	29	0.0689655
chr1	15486620	+	A	chr1:15486620	Kcnb2	LINE	Intron	intron_variant	0	0	15484250	2370	upstream	intronic	ADAR	0.3125	7	22	0.318182	1	20	0.05	22	54	0.407407	0	0	35	0	0	35	0	0	47	0	0.373134	2	11	0.181818	14	27	0.518519	9	29	0.310345
chr1	15486625	+	A	chr1:15486625	Kcnb2	LINE	Intron	intron_variant	0	0	15484244	2381	upstream	intronic	ADAR	0.12381	3	29	0.103448	0	21	0	10	55	0.181818	0	0	41	0	0	35	0	0	48	0	0.0263158	0	16	0	2	29	0.0689655	0	31	0
chr1	15486628	+	A	chr1:15486628	Kcnb2	LINE	Intron	intron_variant	0	0	15484241	2387	upstream	intronic	ADAR	0.209524	6	32	0.1875	1	18	0.0555556	15	55	0.272727	0	0	40	0	0	36	0	0	47	0	0.025974	1	16	0.0625	0	30	0	1	31	0.0322581
chr1	15486705	+	A	chr1:15486705	Kcnb2	LINE	Intron	intron_variant	0	0	-	-	-	-	ADAR	0.0258621	4	82	0.0487805	0	58	0	2	92	0.0217391	0	0	98	0	0	101	0	0	60	0	0.0114943	0	14	0	1	39	0.025641	0	34	0
chr1	15497827	+	A	chr1:15497827	Kcnb2	LINE	Intron	intron_variant	0	0	-	-	-	-	ADAR	0.0223464	1	59	0.0169492	2	48	0.0416667	1	72	0.0138889	0	0	110	0	0	94	0	0	95	0	0.0380435	2	57	0.0350877	1	67	0.0149254	4	60	0.0666667
chr1	15498009	+	A	chr1:15498009	Kcnb2	LINE	Intron	intron_variant	0	0	-	-	-	-	ADAR	0.0761905	2	30	0.0666667	1	34	0.0294118	5	41	0.121951	0	0	58	0	0	60	0	0	46	0	0.00917431	1	31	0.0322581	0	24	0	0	54	0
chr1	15498017	+	A	chr1:15498017	Kcnb2	LINE	Intron	intron_variant	0	0	-	-	-	-	ADARB1	0.0827068	4	54	0.0740741	1	36	0.0277778	6	43	0.139535	0	0	65	0	0	58	0	0	47	0	0	0	38	0	0	31	0	0	75	0
chr1	15499017	+	A	chr1:15499017	Kcnb2	LTR	Intron	intron_variant	0	0	-	-	-	-	ADAR	0.0630631	4	54	0.0740741	2	27	0.0740741	1	30	0.0333333	0	0	48	0	0	61	0	0	29	0	0.140625	9	51	0.176471	6	42	0.142857	3	35	0.0857143
chr1	15499111	+	A	chr1:15499111	Kcnb2	LTR	Intron	intron_variant	0	0	15499663	552	downstream	intronic	ADAR	0.0576132	3	87	0.0344828	6	70	0.0857143	5	86	0.0581395	0	0	94	0	0	113	0	0	72	0	0.151515	8	48	0.166667	6	40	0.15	6	44	0.136364
chr1	15499139	+	A	chr1:15499139	Kcnb2	LTR	Intron	intron_variant	0	0	-	-	-	-	ADAR	0.077193	10	96	0.104167	3	79	0.0379747	9	110	0.0818182	0	0	114	0	0	127	0	0	92	0	0.0149254	1	46	0.0217391	1	42	0.0238095	0	46	0
chr1	15499202	+	A	chr1:15499202	Kcnb2	LTR	Intron	intron_variant	0	0	-	-	-	-	ADARB1	0.0699088	10	129	0.0775194	2	93	0.0215054	11	107	0.102804	0	0	122	0	0	136	0	0	113	0	0	0	42	0	0	33	0	0	63	0
chr1	15499203	+	A	chr1:15499203	Kcnb2	LTR	Intron	intron_variant	0	0	-	-	-	-	ADAR	0.413374	50	129	0.387597	37	93	0.397849	49	107	0.457944	0	0	118	0	0	135	0	0	112	0	0.122302	7	42	0.166667	5	33	0.151515	5	64	0.078125
chr1	15499205	+	A	chr1:15499205	Kcnb2	LTR	Intron	intron_variant	0	0	-	-	-	-	ADAR	0.119266	20	127	0.15748	9	94	0.0957447	10	106	0.0943396	0	0	117	0	0	133	0	0	110	0	0.0143885	0	43	0	2	34	0.0588235	0	62	0
chr1	15499206	+	A	chr1:15499206	Kcnb2	LTR	Intron	intron_variant	0	0	-	-	-	-	ADAR	0.175926	17	127	0.133858	21	92	0.228261	19	105	0.180952	0	0	118	0	0	135	0	0	112	0	0.0642857	4	42	0.0952381	2	35	0.0571429	3	63	0.047619
chr1	15499218	+	A	chr1:15499218	Kcnb2	LTR	Intron	intron_variant	0	0	15499566	348	downstream	intronic	ADAR	0.560831	70	132	0.530303	52	95	0.547368	67	110	0.609091	0	0	119	0	0	137	0	0	114	0	0.0992908	3	42	0.0714286	1	37	0.027027	10	62	0.16129
chr1	15499260	+	A	chr1:15499260	Kcnb2	LTR	Intron	intron_variant	0	0	-	-	-	-	ADARB1	0.0281124	3	108	0.0277778	1	71	0.0140845	3	70	0.0428571	0	0	86	0	0	119	0	0	94	0	0	0	31	0	0	30	0	0	46	0
chr1	15499536	+	A	chr1:15499536	Kcnb2	LTR	Intron	intron_variant	0	0	-	-	-	-	ADARB1	0.0859375	6	60	0.1	2	33	0.0606061	3	35	0.0857143	0	0	80	0	0	62	0	0	68	0	0	0	8	0	0	14	0	0	24	0
chr1	15499542	+	A	chr1:15499542	Kcnb2	LTR	Intron	intron_variant	0	0	-	-	-	-	ADAR	0.0708661	3	61	0.0491803	3	29	0.103448	3	37	0.0810811	0	0	87	0	0	63	0	0	71	0	0.0425532	1	9	0.111111	0	14	0	1	24	0.0416667
chr1	15499545	+	A	chr1:15499545	Kcnb2	LTR	Intron	intron_variant	0	0	-	-	-	-	ADAR	0.0785714	3	64	0.046875	4	36	0.111111	4	40	0.1	0	0	95	0	0	68	0	0	75	0	0.0217391	1	9	0.111111	0	14	0	0	23	0
chr1	15499546	+	A	chr1:15499546	Kcnb2	LTR	Intron	intron_variant	0	0	-	-	-	-	ADAR	0.0684932	2	66	0.030303	1	37	0.027027	7	43	0.162791	0	0	95	0	0	69	0	0	75	0	0.0888889	1	9	0.111111	1	14	0.0714286	2	22	0.0909091
chr1	15499550	+	A	chr1:15499550	Kcnb2	LTR	Intron	intron_variant	0	0	15499231	319	upstream	intronic	ADARB1	0.0596026	2	66	0.030303	3	40	0.075	4	45	0.0888889	0	0	104	0	0	74	0	0	80	0	0	0	11	0	0	16	0	0	24	0
chr1	15499552	+	A	chr1:15499552	Kcnb2	LTR	Intron	intron_variant	0	0	15499231	321	upstream	intronic	ADARB1	0.282051	17	69	0.246377	13	43	0.302326	14	44	0.318182	0	0	107	0	0	78	0	0	82	0	0	0	10	0	0	17	0	0	25	0
chr1	15499571	+	A	chr1:15499571	Kcnb2	LTR	Intron	intron_variant	0	0	-	-	-	-	ADAR	0.244541	29	106	0.273585	14	60	0.233333	13	63	0.206349	0	0	128	0	0	94	0	0	98	0	0.0277778	2	14	0.142857	0	29	0	0	29	0
chr1	15499582	+	A	chr1:15499582	Kcnb2	LTR	Intron	intron_variant	0	0	-	-	-	-	ADARB1	0.0358566	2	113	0.0176991	3	68	0.0441176	4	70	0.0571429	0	0	136	0	0	99	0	0	101	0	0	0	13	0	0	27	0	0	29	0
chr1	15499649	+	A	chr1:15499649	Kcnb2	LTR	Intron	intron_variant	0	0	15499127	522	upstream	intronic	ADARB1	0.341598	50	162	0.308642	32	101	0.316832	42	100	0.42	0	0	186	0	0	119	0	0	131	0	0	0	22	0	0	38	0	0	53	0
chr1	15499651	+	A	chr1:15499651	Kcnb2	LTR	Intron	intron_variant	0	0	15499125	526	upstream	intronic	ADARB1	0.218329	25	165	0.151515	21	104	0.201923	35	102	0.343137	0	0	184	0	0	118	0	0	130	0	0	0	23	0	0	38	0	0	54	0
chr1	15499654	+	A	chr1:15499654	Kcnb2	LTR	Intron	intron_variant	0	0	15499121	533	upstream	intronic	ADAR	0.0756303	11	159	0.0691824	4	97	0.0412371	12	101	0.118812	0	0	185	0	0	119	0	0	129	0	0.00869565	0	22	0	1	39	0.025641	0	54	0
chr1	15499662	+	A	chr1:15499662	Kcnb2	LTR	Intron	intron_variant	0	0	15499113	549	upstream	intronic	ADARB1	0.022409	2	155	0.0129032	3	102	0.0294118	3	100	0.03	0	0	185	0	0	118	0	0	129	0	0	0	24	0	0	38	0	0	50	0
chr1	15500188	+	A	chr1:15500188	Kcnb2	LINE	Intron	intron_variant	0	0	-	-	-	-	ADAR	0.151515	9	55	0.163636	3	24	0.125	3	20	0.15	0	0	42	0	0	30	0	0	33	0	0.141304	3	35	0.0857143	7	29	0.241379	3	28	0.107143
chr1	15500191	+	A	chr1:15500191	Kcnb2	LINE	Intron	intron_variant	0	0	-	-	-	-	ADAR	0.07	5	55	0.0909091	1	24	0.0416667	1	21	0.047619	0	0	43	0	0	30	0	0	34	0	0.0454545	2	32	0.0625	2	28	0.0714286	0	28	0
chr1	15500203	+	A	chr1:15500203	Kcnb2	LINE	Intron	intron_variant	0	0	-	-	-	-	ADAR	0.376238	20	57	0.350877	10	25	0.4	8	19	0.421053	0	0	43	0	0	28	0	0	33	0	0.0888889	3	32	0.09375	2	30	0.0666667	3	28	0.107143
chr1	15500209	+	A	chr1:15500209	Kcnb2	LINE	Intron	intron_variant	0	0	-	-	-	-	ADAR	0.234694	16	56	0.285714	3	24	0.125	4	18	0.222222	0	0	44	0	0	28	0	0	34	0	0.284091	9	32	0.28125	9	29	0.310345	7	27	0.259259
chr1	15500210	+	A	chr1:15500210	Kcnb2	LINE	Intron	intron_variant	0	0	-	-	-	-	ADAR	0.244898	12	56	0.214286	6	24	0.25	6	18	0.333333	0	0	44	0	0	28	0	0	35	0	0.125	5	32	0.15625	5	29	0.172414	1	27	0.037037
chr1	15500211	+	A	chr1:15500211	Kcnb2	LINE	Intron	intron_variant	0	0	-	-	-	-	ADAR	0.0824742	6	56	0.107143	1	24	0.0416667	1	17	0.0588235	0	0	41	0	0	28	0	0	32	0	0.0777778	1	33	0.030303	4	29	0.137931	2	28	0.0714286
chr1	15500212	+	A	chr1:15500212	Kcnb2	LINE	Intron	intron_variant	0	0	-	-	-	-	ADAR	0.0645161	5	54	0.0925926	0	23	0	1	16	0.0625	0	0	40	0	0	28	0	0	30	0	0.141304	2	34	0.0588235	8	30	0.266667	3	28	0.107143
chr1	15500213	+	A	chr1:15500213	Kcnb2	LINE	Intron	intron_variant	0	0	-	-	-	-	ADAR	0.378947	21	55	0.381818	11	23	0.478261	4	17	0.235294	0	0	41	0	0	28	0	0	29	0	0.076087	3	34	0.0882353	3	30	0.1	1	28	0.0357143
chr1	15500221	+	A	chr1:15500221	Kcnb2	LINE	Intron	intron_variant	0	0	-	-	-	-	ADAR	0.0833333	3	50	0.06	3	19	0.157895	1	15	0.0666667	0	0	42	0	0	21	0	0	24	0	0.0531915	2	34	0.0588235	1	31	0.0322581	2	29	0.0689655
chr1	15500227	+	A	chr1:15500227	Kcnb2	LINE	Intron	intron_variant	0	0	-	-	-	-	ADARB1	0.142857	8	49	0.163265	3	16	0.1875	0	12	0	0	0	36	0	0	17	0	0	18	0	0	0	34	0	0	30	0	0	30	0
chr1	15500240	+	A	chr1:15500240	Kcnb2	LINE	Intron	intron_variant	0	0	-	-	-	-	ADARB1	0.113636	2	30	0.0666667	2	8	0.25	1	6	0.166667	0	0	23	0	0	9	0	0	15	0	0	0	28	0	0	29	0	0	22	0
chr1	15500316	+	A	chr1:15500316	Kcnb2	LINE	Intron	intron_variant	0	0	15501411	1095	downstream	intronic	ADAR	0.238095	3	21	0.142857	5	7	0.714286	2	14	0.142857	0	0	20	0	0	11	0	0	26	0	0.0136986	0	24	0	0	22	0	1	27	0.037037
chr1	15501397	+	A	chr1:15501397	Kcnb2	LINE	Intron	intron_variant	0	0	15500330	1067	upstream	intronic	ADARB1	0.113208	2	22	0.0909091	2	12	0.166667	2	19	0.105263	0	0	11	0	0	12	0	0	4	0	0	0	8	0	0	9	0	0	8	0
chr1	15501401	+	A	chr1:15501401	Kcnb2	LINE	Intron	intron_variant	0	0	15500326	1075	upstream	intronic	ADARB1	0.280702	7	24	0.291667	2	14	0.142857	7	19	0.368421	0	0	11	0	0	13	0	0	5	0	0	0	8	0	0	9	0	0	7	0
chr1	15501404	+	A	chr1:15501404	Kcnb2	LINE	Intron	intron_variant	0	0	15500325	1079	upstream	intronic	ADAR	0.298246	4	24	0.166667	6	14	0.428571	7	19	0.368421	0	0	11	0	0	12	0	0	5	0	0.125	1	8	0.125	0	9	0	2	7	0.285714
chr1	15503869	+	A	chr1:15503869	Kcnb2	LINE	Intron	intron_variant	0	0	-	-	-	-	ADARB1	0.0555556	1	15	0.0666667	1	12	0.0833333	0	9	0	0	0	33	0	0	24	0	0	19	0	0	0	24	0	0	11	0	0	35	0
chr1	15503880	+	A	chr1:15503880	Kcnb2	LINE	Intron	intron_variant	0	0	-	-	-	-	ADAR	0.333333	4	18	0.222222	6	11	0.545455	4	13	0.307692	0	0	35	0	0	28	0	0	20	0	0.046875	2	19	0.105263	1	12	0.0833333	0	33	0
chr1	15503893	+	A	chr1:15503893	Kcnb2	LINE	Intron	intron_variant	0	0	-	-	-	-	ADARB1	0.298246	8	22	0.363636	8	18	0.444444	1	17	0.0588235	0	0	39	0	0	25	0	0	21	0	0	0	20	0	0	11	0	0	31	0
chr1	15503901	+	A	chr1:15503901	Kcnb2	LINE	Intron	intron_variant	0	0	-	-	-	-	ADAR	0.136364	1	21	0.047619	4	19	0.210526	4	26	0.153846	0	0	38	0	0	26	0	0	20	0	0.0153846	0	21	0	0	13	0	1	31	0.0322581
chr1	15503907	+	A	chr1:15503907	Kcnb2	LINE	Intron	intron_variant	0	0	-	-	-	-	ADARB1	0.19403	4	21	0.190476	6	19	0.315789	3	27	0.111111	0	0	36	0	0	24	0	0	22	0	0	0	22	0	0	13	0	0	30	0
chr1	15503919	+	A	chr1:15503919	Kcnb2	LINE	Intron	intron_variant	0	0	-	-	-	-	ADAR	0.0704225	3	22	0.136364	1	22	0.0454545	1	27	0.037037	0	0	36	0	0	22	0	0	22	0	0.04	2	27	0.0740741	0	15	0	1	33	0.030303
chr1	15503920	+	A	chr1:15503920	Kcnb2	LINE	Intron	intron_variant	0	0	-	-	-	-	ADAR	0.0555556	2	22	0.0909091	1	23	0.0434783	1	27	0.037037	0	0	36	0	0	21	0	0	21	0	0.0675676	4	26	0.153846	0	15	0	1	33	0.030303
chr1	155160743	+	A	chr1:155160743	Stx6	SINE	Intron	non_coding_transcript_variant	0	0	155160358	385	upstream	intronic	ADARB1	0.09	4	44	0.0909091	1	11	0.0909091	4	45	0.0888889	0	0	43	0	0	37	0	0	139	0	0	0	10	0	0	11	0	0	8	0
chr1	155161512	+	A	chr1:155161512	Stx6	SINE	Intron	non_coding_transcript_variant	0	0	155159970	1542	upstream	intronic	ADAR	0.528846	23	46	0.5	10	22	0.454545	22	36	0.611111	0	0	57	0	0	27	0	0	144	0	0.6	7	13	0.538462	7	9	0.777778	7	13	0.538462
chr1	155161523	+	A	chr1:155161523	Stx6	SINE	Intron	non_coding_transcript_variant	0	0	-	-	-	-	ADAR	0.0869565	3	50	0.06	2	26	0.0769231	5	39	0.128205	0	0	62	0	0	30	0	0	153	0	0.025	0	15	0	0	11	0	1	14	0.0714286
chr1	155161529	+	A	chr1:155161529	Stx6	SINE	Intron	non_coding_transcript_variant	0	0	-	-	-	-	ADARB1	0.176471	8	51	0.156863	6	27	0.222222	7	41	0.170732	0	0	71	0	0	31	0	0	158	0	0	0	14	0	0	11	0	0	13	0
chr1	155170480	+	A	chr1:155170480	Stx6	SINE	Intron	non_coding_transcript_variant	0	0	-	-	-	-	ADAR	0.0457143	3	75	0.04	2	51	0.0392157	3	49	0.0612245	0	0	75	0	0	57	0	0	162	0	0.0144928	1	31	0.0322581	0	14	0	0	24	0
chr1	155170503	+	A	chr1:155170503	Stx6	SINE	Intron	non_coding_transcript_variant	0	0	-	-	-	-	ADARB1	0.0449438	4	81	0.0493827	0	53	0	4	44	0.0909091	0	0	81	0	0	56	0	0	139	0	0	0	36	0	0	13	0	0	29	0
chr1	155171700	+	A	chr1:155171700	Stx6	SINE	Intron	non_coding_transcript_variant	0	0	-	-	-	-	ADAR	0.2375	8	37	0.216216	3	17	0.176471	8	26	0.307692	0	0	42	0	0	48	0	0	200	0	0.291667	4	9	0.444444	7	20	0.35	3	19	0.157895
chr1	155171742	+	A	chr1:155171742	Stx6	SINE	Intron	non_coding_transcript_variant	0	0	-	-	-	-	ADARB1	0.25	4	33	0.121212	6	20	0.3	8	19	0.421053	0	0	36	0	0	42	0	0	167	0	0	0	12	0	0	27	0	0	21	0
chr1	155171744	+	A	chr1:155171744	Stx6	SINE	Intron	non_coding_transcript_variant	0	0	-	-	-	-	ADARB1	0.166667	3	32	0.09375	2	20	0.1	7	20	0.35	0	0	37	0	0	43	0	0	172	0	0	0	12	0	0	24	0	0	20	0
chr1	155184799	+	A	chr1:155184799	Gm8850,Stx6	SINE	Intron	non_coding_transcript_exon_variant	0	0	155184984	185	downstream	intronic	ADARB1	0.0462428	2	67	0.0298507	3	45	0.0666667	3	61	0.0491803	0	0	55	0	0	69	0	0	93	0	0	0	18	0	0	25	0	0	27	0
chr1	155206782	+	A	chr1:155206782	Stx6	.	intergenic	intron_variant	0	0	-	-	-	-	ADARB1	0.0549451	5	71	0.0704225	3	52	0.0576923	2	59	0.0338983	0	0	83	0	0	73	0	0	27	0	0	0	13	0	0	11	0	0	29	0
chr1	15524757	+	A	chr1:15524757	Kcnb2	LINE	Intron	intron_variant	0	0	15526878	2121	downstream	intronic	ADARB1	0.0257732	0	69	0	3	50	0.06	2	75	0.0266667	0	0	68	0	0	90	0	0	93	0	0	0	33	0	0	55	0	0	70	0
chr1	155283922	-	T	chr1:155283922	Xpr1	.	Intron	regulatory_region_variant	0	0	-	-	-	-	ADARB1	0.0425532	1	11	0.0909091	0	15	0	1	21	0.047619	0	0	26	0	0	23	0	0	44	0	0	0	6	0	0	5	0	0	6	0
chr1	155313753	-	T	chr1:155313753	Gm22569,Xpr1	SINE	Intron	intron_variant	0	0	155315029	1276	upstream	intronic	ADAR	0.123377	3	43	0.0697674	6	53	0.113208	10	58	0.172414	0	0	126	0	0	72	0	0	52	0	0.0113636	0	28	0	0	21	0	1	39	0.025641
chr1	155313757	-	T	chr1:155313757	Gm22569,Xpr1	SINE	Intron	intron_variant	0	0	155315023	1266	upstream	intronic	ADAR	0.0506329	3	45	0.0666667	0	54	0	5	59	0.0847458	0	0	126	0	0	71	0	0	56	0	0.0444444	1	29	0.0344828	0	22	0	3	39	0.0769231
chr1	155316142	-	T	chr1:155316142	Gm22569,Xpr1	SINE	Intron	intron_variant	0	0	155316068	74	downstream	exonic	ADARB1	0.25	0	6	0	2	3	0.666667	2	7	0.285714	0	0	16	0	0	6	0	0	63	0	0	0	3	0	0	5	0	0	3	0
chr1	155363599	-	T	chr1:155363599	Xpr1	SINE	Intron	non_coding_transcript_variant	0	0	-	-	-	-	ADARB1	0.174603	6	27	0.222222	5	22	0.227273	0	14	0	0	0	28	0	0	29	0	0	66	0	0	0	23	0	0	27	0	0	17	0
chr1	155364274	-	T	chr1:155364274	Xpr1	SINE	Intron	non_coding_transcript_variant	0	0	-	-	-	-	ADARB1	0.0402685	4	49	0.0816327	0	51	0	2	49	0.0408163	0	0	54	0	0	56	0	0	35	0	0	0	10	0	0	16	0	0	14	0
chr1	155376155	-	T	chr1:155376155	Xpr1	SINE	Intron	non_coding_transcript_variant	0	0	155374928	1227	downstream	intronic	ADARB1	0.0854701	2	16	0.125	6	52	0.115385	2	49	0.0408163	0	0	31	0	0	40	0	0	37	0	0	0	19	0	0	24	0	0	26	0
chr1	155376174	-	T	chr1:155376174	Xpr1	SINE	Intron	non_coding_transcript_variant	0	0	155374908	1266	downstream	intronic	ADAR	0.0775862	2	19	0.105263	4	49	0.0816327	3	48	0.0625	0	0	33	0	0	39	0	0	36	0	0.0140845	0	24	0	0	21	0	1	26	0.0384615
chr1	15540353	+	A	chr1:15540353	Kcnb2	LINE	Intron	intron_variant	0	0	-	-	-	-	ADAR	0.027439	1	132	0.00757576	6	102	0.0588235	2	94	0.0212766	0	0	103	0	0	115	0	0	129	0	0.0295567	1	59	0.0169492	0	64	0	5	80	0.0625
chr1	15540360	+	A	chr1:15540360	Kcnb2	LINE	Intron	intron_variant	0	0	-	-	-	-	ADAR	0.0612245	9	140	0.0642857	9	109	0.0825688	3	94	0.0319149	0	0	116	0	0	119	0	0	129	0	0.0409091	3	62	0.0483871	3	73	0.0410959	3	85	0.0352941
chr1	15540368	+	A	chr1:15540368	Kcnb2	LINE	Intron	intron_variant	0	0	-	-	-	-	ADAR	0.0730994	15	141	0.106383	7	108	0.0648148	3	93	0.0322581	0	0	112	0	0	112	0	0	127	0	0.0663717	6	63	0.0952381	5	75	0.0666667	4	88	0.0454545
chr1	15540400	+	A	chr1:15540400	Kcnb2	LINE	Intron	intron_variant	0	0	-	-	-	-	ADARB1	0.03125	4	117	0.034188	6	115	0.0521739	0	88	0	0	0	117	0	0	115	0	0	118	0	0	0	51	0	0	64	0	0	86	0
chr1	155407648	-	T	chr1:155407648	Xpr1	SINE	Intron	non_coding_transcript_variant	0	0	155405925	1723	downstream	intronic	ADAR	0.411765	4	6	0.666667	1	1	1	2	10	0.2	0	0	13	0	0	6	0	0	50	0	0.0666667	0	7	0	1	2	0.5	0	6	0
chr1	155407653	-	T	chr1:155407653	Xpr1	SINE	Intron	non_coding_transcript_variant	0	0	155405920	1733	downstream	intronic	ADAR	0.722222	5	7	0.714286	1	1	1	7	10	0.7	0	0	14	0	0	6	0	0	76	0	0.6	6	7	0.857143	1	2	0.5	2	6	0.333333
chr1	155407847	-	T	chr1:155407847	Xpr1	SINE	Intron	non_coding_transcript_variant	0	0	155407684	163	downstream	intronic	ADARB1	0.175	2	10	0.2	2	10	0.2	3	20	0.15	0	0	11	0	0	19	0	0	26	0	0	0	6	0	0	11	0	0	6	0
chr1	155407873	-	T	chr1:155407873	Xpr1	SINE	Intron	non_coding_transcript_variant	0	0	155407658	215	downstream	intronic	ADAR	0.4	3	7	0.428571	6	8	0.75	3	15	0.2	0	0	11	0	0	20	0	0	64	0	0.105263	2	6	0.333333	0	9	0	0	4	0
chr1	15542373	+	A	chr1:15542373	Kcnb2	LINE	Intron	intron_variant	0	0	-	-	-	-	ADAR	0.0888889	2	19	0.105263	1	8	0.125	1	18	0.0555556	0	0	26	0	0	17	0	0	15	0	0.222222	3	15	0.2	5	16	0.3125	2	14	0.142857
chr1	15548429	+	A	chr1:15548429	Kcnb2	LINE	Intron	intron_variant	0	0	-	-	-	-	ADAR	0.120301	7	34	0.205882	5	44	0.113636	4	55	0.0727273	0	0	71	0	0	48	0	0	56	0	0.0943396	1	21	0.047619	0	16	0	4	16	0.25
chr1	15548455	+	A	chr1:15548455	Kcnb2	LINE	Intron	intron_variant	0	0	-	-	-	-	ADARB1	0.0416667	3	44	0.0681818	0	59	0	4	65	0.0615385	0	0	102	0	0	67	0	0	68	0	0	0	17	0	0	15	0	0	14	0
chr1	15548543	+	A	chr1:15548543	Kcnb2	LINE	Intron	intron_variant	0	0	-	-	-	-	ADAR	0.11165	7	62	0.112903	5	88	0.0568182	11	56	0.196429	0	0	107	0	0	83	0	0	68	0	0.2	1	12	0.0833333	5	25	0.2	5	18	0.277778
chr1	15548617	+	A	chr1:15548617	Kcnb2	LINE	Intron	intron_variant	0	0	-	-	-	-	ADAR	0.101796	2	45	0.0444444	7	79	0.0886076	8	43	0.186047	0	0	70	0	0	67	0	0	54	0	0.0769231	0	15	0	2	22	0.0909091	3	28	0.107143
chr1	15550416	+	A	chr1:15550416	Kcnb2	LTR	Intron	intron_variant	0	0	-	-	-	-	ADAR	0.021148	0	94	0	3	130	0.0230769	4	107	0.0373832	0	0	101	0	0	126	0	0	90	0	0.0125786	1	52	0.0192308	1	46	0.0217391	0	61	0
chr1	15554607	+	A	chr1:15554607	Gm37138,Kcnb2	LINE	Intron	intron_variant	0	0	-	-	-	-	ADAR	0.0737327	6	76	0.0789474	4	73	0.0547945	6	68	0.0882353	0	0	120	0	0	110	0	0	76	0	0.152778	7	32	0.21875	11	63	0.174603	4	49	0.0816327
chr1	15554610	+	A	chr1:15554610	Gm37138,Kcnb2	LINE	Intron	intron_variant	0	0	-	-	-	-	ADAR	0.0234742	0	72	0	3	73	0.0410959	2	68	0.0294118	0	0	123	0	0	111	0	0	79	0	0.0215827	2	32	0.0625	1	58	0.0172414	0	49	0
chr1	15554614	+	A	chr1:15554614	Gm37138,Kcnb2	LINE	Intron	intron_variant	0	0	15556601	1987	downstream	exonic	ADAR	0.1	3	59	0.0508475	9	69	0.130435	8	72	0.111111	0	0	130	0	0	111	0	0	71	0	0.142857	5	24	0.208333	6	57	0.105263	7	45	0.155556
chr1	15554622	+	A	chr1:15554622	Gm37138,Kcnb2	LINE	Intron	intron_variant	0	0	15556592	1970	downstream	exonic	ADAR	0.107843	5	67	0.0746269	12	71	0.169014	5	66	0.0757576	0	0	124	0	0	109	0	0	70	0	0.0147059	0	29	0	0	62	0	2	45	0.0444444
chr1	15554630	+	A	chr1:15554630	Gm37138,Kcnb2	LINE	Intron	intron_variant	0	0	15556584	1954	downstream	exonic	ADARB1	0.0807175	4	81	0.0493827	11	75	0.146667	3	67	0.0447761	0	0	119	0	0	107	0	0	72	0	0	0	38	0	0	65	0	0	60	0
chr1	15554713	+	A	chr1:15554713	Gm37138,Kcnb2	LINE	Intron	intron_variant	0	0	15556546	1833	downstream	exonic	ADAR	0.169118	7	56	0.125	8	43	0.186047	8	37	0.216216	0	0	60	0	0	62	0	0	29	0	0.00833333	0	32	0	1	46	0.0217391	0	42	0
chr1	15554728	+	A	chr1:15554728	Gm37138,Kcnb2	LINE	Intron	intron_variant	0	0	15556531	1803	downstream	exonic	ADAR	0.192308	7	43	0.162791	7	37	0.189189	6	24	0.25	0	0	47	0	0	40	0	0	20	0	0.0196078	0	29	0	0	38	0	2	35	0.0571429
chr1	155561599	+	A	chr1:155561599	Acbd6	.	Intron	intron_variant	0	0	155562590	991	downstream	intronic	ADARB1	0.0714286	3	27	0.111111	1	23	0.0434783	1	20	0.05	0	0	25	0	0	13	0	0	64	0	0	0	7	0	0	6	0	0	10	0
chr1	15556534	+	A	chr1:15556534	Gm37138,Kcnb2	LINE	Exon	non_coding_transcript_exon_variant	0	0	15554726	1808	upstream	intronic	ADARB1	0.127273	1	35	0.0285714	3	31	0.0967742	10	44	0.227273	0	0	61	0	0	54	0	0	45	0	0	0	8	0	0	12	0	0	18	0
chr1	15556581	+	A	chr1:15556581	Gm37138,Kcnb2	LINE	Exon	non_coding_transcript_exon_variant	0	0	15554633	1948	upstream	intronic	ADAR	0.038835	0	35	0	3	36	0.0833333	1	32	0.03125	0	0	38	0	0	45	0	0	33	0	0.0263158	0	7	0	1	8	0.125	0	23	0
chr1	15556588	+	A	chr1:15556588	Gm37138,Kcnb2	LINE	Exon	non_coding_transcript_exon_variant	0	0	15554625	1963	upstream	intronic	ADARB1	0.11	1	36	0.0277778	5	35	0.142857	5	29	0.172414	0	0	37	0	0	42	0	0	30	0	0	0	7	0	0	8	0	0	22	0
chr1	15556612	+	A	chr1:15556612	Gm37138,Kcnb2	LINE	Exon	non_coding_transcript_exon_variant	0	0	-	-	-	-	ADAR	0.0714286	1	32	0.03125	2	33	0.0606061	4	33	0.121212	0	0	35	0	0	42	0	0	29	0	0.030303	0	7	0	1	5	0.2	0	21	0
chr1	155568039	+	A	chr1:155568039	Acbd6	SINE	Intron	non_coding_transcript_variant	0	0	155570163	2124	downstream	intronic	ADARB1	0.0454545	0	39	0	2	23	0.0869565	3	48	0.0625	0	0	55	0	0	44	0	0	8	0	0	0	24	0	0	24	0	0	25	0
chr1	155572155	+	A	chr1:155572155	Acbd6	LTR	Intron	non_coding_transcript_variant	0	0	-	-	-	-	ADARB1	0.1375	2	22	0.0909091	6	27	0.222222	3	31	0.0967742	0	0	25	0	0	34	0	0	16	0	0	0	9	0	0	12	0	0	9	0
chr1	155573211	+	A	chr1:155573211	Acbd6	LTR	Intron	non_coding_transcript_variant	0	0	-	-	-	-	ADAR	0.0714286	5	63	0.0793651	3	53	0.0566038	4	52	0.0769231	0	0	76	0	0	57	0	0	39	0	0.012987	1	29	0.0344828	0	22	0	0	26	0
chr1	155573222	+	A	chr1:155573222	Acbd6	LTR	Intron	non_coding_transcript_variant	0	0	-	-	-	-	ADARB1	0.0425532	4	45	0.0888889	0	44	0	2	52	0.0384615	0	0	69	0	0	56	0	0	29	0	0	0	22	0	0	14	0	0	26	0
chr1	155573763	+	A	chr1:155573763	Acbd6	SINE	Intron	non_coding_transcript_variant	0	0	-	-	-	-	ADARB1	0.0595238	2	54	0.037037	0	53	0	8	61	0.131148	0	0	84	0	0	54	0	0	29	0	0	0	32	0	0	19	0	0	11	0
chr1	155597119	+	A	chr1:155597119	Acbd6	.	Intron	non_coding_transcript_variant	0	0	-	-	-	-	ADAR	0.0588235	0	32	0	3	24	0.125	2	29	0.0689655	0	0	36	0	0	31	0	0	7	0	0.0434783	1	20	0.05	1	13	0.0769231	0	13	0
chr1	155600895	+	A	chr1:155600895	Acbd6	LINE	Intron	non_coding_transcript_variant	0	0	155600132	763	upstream	intronic	ADARB1	0.0508475	2	15	0.133333	0	22	0	1	22	0.0454545	0	0	29	0	0	6	0	0	7	0	0	0	2	0	0	9	0	0	5	0
chr1	155637414	+	A	chr1:155637414	Acbd6	SINE	Intron	non_coding_transcript_variant	0	0	-	-	-	-	ADAR	0.127273	4	12	0.333333	2	21	0.0952381	1	22	0.0454545	0	0	39	0	0	33	0	0	15	0	0.0322581	0	11	0	0	8	0	1	12	0.0833333
chr1	155637439	+	A	chr1:155637439	Acbd6	SINE	Intron	non_coding_transcript_variant	0	0	-	-	-	-	ADARB1	0.0740741	3	11	0.272727	1	20	0.05	0	23	0	0	0	43	0	0	36	0	0	12	0	0	0	8	0	0	12	0	0	11	0
chr1	155673422	+	A	chr1:155673422	Acbd6	SINE	Intron	non_coding_transcript_variant	0	0	-	-	-	-	ADAR	0.225	5	15	0.333333	4	15	0.266667	0	10	0	0	0	23	0	0	14	0	0	24	0	0.0588235	0	3	0	2	16	0.125	0	15	0
chr1	155673424	+	A	chr1:155673424	Acbd6	SINE	Intron	non_coding_transcript_variant	0	0	-	-	-	-	ADAR	0.0731707	0	16	0	2	15	0.133333	1	10	0.1	0	0	25	0	0	14	0	0	42	0	0.30303	2	3	0.666667	1	15	0.0666667	7	15	0.466667
chr1	155676788	+	A	chr1:155676788	Acbd6	SINE	Intron	non_coding_transcript_variant	0	0	155676465	323	upstream	intronic	ADARB1	0.0576923	1	14	0.0714286	2	20	0.1	0	18	0	0	0	15	0	0	26	0	0	24	0	0	0	8	0	0	4	0	0	9	0
chr1	155676803	+	A	chr1:155676803	Acbd6	SINE	Intron	non_coding_transcript_variant	0	0	155676449	354	upstream	intronic	ADARB1	0.0784314	3	18	0.166667	1	18	0.0555556	0	15	0	0	0	20	0	0	26	0	0	53	0	0	0	8	0	0	4	0	0	8	0
chr1	15567850	+	A	chr1:15567850	Kcnb2	SINE	Intron	intron_variant	0	0	-	-	-	-	ADARB1	0.0160858	3	128	0.0234375	3	112	0.0267857	0	133	0	0	0	159	0	0	112	0	0	119	0	0	0	26	0	0	49	0	0	33	0
chr1	155684460	+	A	chr1:155684460	Acbd6	SINE	Intron	non_coding_transcript_variant	0	0	-	-	-	-	ADARB1	0.12987	3	18	0.166667	3	29	0.103448	4	30	0.133333	0	0	36	0	0	26	0	0	52	0	0	0	2	0	0	6	0	0	10	0
chr1	155867555	-	T	chr1:155867555	Cep350,Gm36934	SINE	Intron	intron_variant	0	0	-	-	-	-	ADAR	0.0531915	1	28	0.0357143	2	30	0.0666667	2	36	0.0555556	0	0	35	0	0	50	0	0	52	0	0.0344828	1	24	0.0416667	0	12	0	1	22	0.0454545
chr1	15588127	+	A	chr1:15588127	Kcnb2	LTR	Intron	intron_variant	0	0	-	-	-	-	ADAR	0.043038	4	137	0.0291971	5	143	0.034965	8	115	0.0695652	0	0	169	0	0	142	0	0	97	0	0.0176471	2	40	0.05	0	48	0	1	82	0.0121951
chr1	155882659	-	T	chr1:155882659	Cep350,Gm37383	LTR	Intron	non_coding_transcript_variant	0	0	155884996	2337	upstream	intronic	ADAR	0.327586	5	18	0.277778	11	25	0.44	3	15	0.2	0	0	14	0	0	27	0	0	38	0	0.189189	1	13	0.0769231	2	10	0.2	4	14	0.285714
chr1	155913052	-	T	chr1:155913052	Cep350	SINE	Intron	intron_variant	0	0	155912125	927	downstream	intronic	ADARB1	0.0344828	1	25	0.04	0	19	0	2	43	0.0465116	0	0	64	0	0	47	0	0	27	0	0	0	14	0	0	14	0	0	6	0
chr1	155914510	-	T	chr1:155914510	Cep350	SINE	Intron	intron_variant	0	0	155913064	1446	downstream	intronic	ADARB1	0.147541	2	17	0.117647	1	23	0.0434783	6	21	0.285714	0	0	50	0	0	25	0	0	32	0	0	0	11	0	0	16	0	0	15	0
chr1	155914511	-	T	chr1:155914511	Cep350	SINE	Intron	intron_variant	0	0	155913064	1447	downstream	intronic	ADARB1	0.114754	2	17	0.117647	4	23	0.173913	1	21	0.047619	0	0	50	0	0	25	0	0	27	0	0	0	11	0	0	16	0	0	15	0
[truncated: 95,208 more rows]

## Sheet: README
Supplemental Table S3: Nascent-seq editing sites identified in this study. Nascent-RNA was prepared from brains of wildtype, Adarb1-/-, and Adarb1-/-; Adar-/- mice and subjected to Illumina sequencing (3 replicates each). After mapping to the mouse genome (mm10), A-to-I editing sites were identified using RDD pred. Individual column labels are as follows:
[truncated: 24 more rows]
