# Supplementary material for: A high resolution A-to-I editing map in the mouse identifies editing events controlled by pre-mRNA splicing
Source: Genome Res. 2019 Sep;29(9):1453–63. doi: 10.1101/gr.242636.118 (PMC6724681; doi:10.1101/gr.242636.118)
Supplement: Supplemental Material [file supp_gr.242636.118_Supplemental_Table_S6.xlsx]

## Sheet: bone marrow and primary neurons
chromosome	position	strand	referenceBase	id	gene_name(s)	repeatType	genome_annotation	VEP_annotation	radar	darned	ECS_position	ECS_distance	ECS_orientation	ECS_annotation	BM_stats_LFC	BM_stats_gmean_Mea	BM_stats_gmean_dmso	BM_stats_p-value_Welch_log_paired	|	PN_stats_LFC	PN_stats_gmean_Mea	PN_stats_gmean_dmso	PN_stats_p-value_Welch_log_paired	|	BM_editedReadCountDMSO.rep1	BM_totalReadCountDMSO.rep1	BM_editingLevelDMSO.rep1	BM_editedReadCountMea.rep1	BM_totalReadCountMea.rep1	BM_editingLevelMea.rep1	BM_editedReadCountDMSO.rep2	BM_totalReadCountDMSO.rep2	BM_editingLevelDMSO.rep2	BM_editedReadCountMea.rep2	BM_totalReadCountMea.rep2	BM_editingLevelMea.rep2	BM_editedReadCountDMSO.rep3	BM_totalReadCountDMSO.rep3	BM_editingLevelDMSO.rep3	BM_editedReadCountMea.rep3	BM_totalReadCountMea.rep3	BM_editingLevelMea.rep3	BM_editedReadCountDMSO.rep4	BM_totalReadCountDMSO.rep4	BM_editingLevelDMSO.rep4	BM_editedReadCountMea.rep4	BM_totalReadCountMea.rep4	BM_editingLevelMea.rep4	BM_editedReadCountDMSO.rep5
chr1	4781939	-	T	chr1:4781939	Gm37144,Mrpl15	SINE	UTR	3_prime_UTR_variant	0	0	4783376	1437	upstream	intronic	0	<0.001	<0.001	---	|	1.06984	0.00366	0.00174	0.568	|	0	10	0	0	10	0	0	12	0	0	3	0	0	17	0	0	4	0	0	7	0	0	4	0	0
chr1	7172369	+	A	chr1:7172369	Pcmtd1	.	UTR	3_prime_UTR_variant	0	0	-	-	-	-	-1.36262	0.00195	0.00501	0.422	|	0.762593	0.00297	0.00175	0.449	|	1	205	0.00487805	0	33	0	0	121	0	3	55	0.0545455	4	223	0.0179372	0	58	0	6	356	0.0168539	0	139	0	2
chr1	7172370	+	A	chr1:7172370	Pcmtd1	.	UTR	3_prime_UTR_variant	0	0	-	-	-	-	-3.79895	<0.001	0.0139	0.00451	|	-0.405494	0.00272	0.0036	0.758	|	4	203	0.0197044	0	33	0	2	121	0.0165289	0	53	0	7	223	0.0313901	0	58	0	12	359	0.0334262	0	135	0	0
chr1	9722558	-	T	chr1:9722558	Vcpip1	SINE	UTR	3_prime_UTR_variant	0	0	-	-	-	-	0.0407704	0.00188	0.00182	0.977	|	-0.360127	0.0135	0.0174	0.831	|	4	109	0.0366972	0	84	0	0	54	0	0	78	0	0	99	0	0	115	0	0	23	0	0	12	0	0
chr1	10031543	-	T	chr1:10031543	Cops5	SINE	Intron	non_coding_transcript_exon_variant	0	0	-	-	-	-	3.31623	0.00996	<0.001	0.0767	|	6.30091	0.219	0.00278	0.0169	|	0	21	0	0	45	0	0	17	0	1	16	0.0625	0	14	0	0	45	0	0	19	0	0	21	0	0
chr1	10031579	-	T	chr1:10031579	Cops5	SINE	Intron	non_coding_transcript_exon_variant	0	0	10030991	588	downstream	intronic	2.28865	0.00489	<0.001	0.175	|	3.79896	0.0938	0.00674	0.0888	|	0	20	0	0	48	0	0	21	0	2	18	0.111111	0	13	0	6	49	0.122449	0	16	0	0	21	0	0
chr1	10031581	-	T	chr1:10031581	Cops5	SINE	Intron	non_coding_transcript_exon_variant	1	1	10030989	592	downstream	intronic	0.891846	0.00186	<0.001	0.363	|	6.49245	0.231	0.00257	0.0125	|	0	21	0	0	49	0	0	20	0	0	20	0	0	13	0	2	49	0.0408163	0	16	0	0	21	0	0
chr1	10031590	-	T	chr1:10031590	Cops5	SINE	Intron	non_coding_transcript_exon_variant	1	1	-	-	-	-	-1.44064	<0.001	0.00271	0.363	|	2.80842	0.0209	0.00298	0.22	|	0	20	0	0	47	0	0	22	0	0	19	0	0	11	0	0	52	0	0	11	0	0	21	0	2
chr1	11596989	+	A	chr1:11596989	A830018L16Rik	SINE	UTR	3_prime_UTR_variant	1	1	-	-	-	-	---	---	---	---	|	1.47616	0.00278	<0.001	0.374	|	---	---	---	---	---	---	---	---	---	---	---	---	---	---	---	---	---	---	0	4	0	---	---	---	---
chr1	11597042	+	A	chr1:11597042	A830018L16Rik	SINE	UTR	3_prime_UTR_variant	1	1	-	-	-	-	---	---	---	---	|	1.49125	0.0165	0.00587	0.593	|	---	---	---	---	---	---	---	---	---	---	---	---	---	---	---	---	---	---	0	4	0	---	---	---	---
chr1	11597052	+	A	chr1:11597052	A830018L16Rik	SINE	UTR	3_prime_UTR_variant	1	1	-	-	-	-	---	---	---	---	|	-1.51317	0.00714	0.0204	0.589	|	---	---	---	---	---	---	---	---	---	---	---	---	---	---	---	---	---	---	0	2	0	---	---	---	---
chr1	13625006	-	T	chr1:13625006	Lactb2	SINE	UTR	3_prime_UTR_variant	0	0	-	-	-	-	-6.48965	<0.001	0.0899	7.08e-05	|	0.185193	0.0458	0.0403	0.94	|	7	67	0.104478	0	4	0	4	62	0.0645161	0	2	0	1	60	0.0166667	0	4	0	18	95	0.189474	0	16	0	14
chr1	13625010	-	T	chr1:13625010	Lactb2	SINE	UTR	3_prime_UTR_variant	0	0	13625724	714	upstream	UTR	-6.53825	0.00217	0.202	0.00172	|	0.270667	0.352	0.292	0.631	|	9	65	0.138462	0	4	0	9	62	0.145161	0	2	0	13	59	0.220339	0	4	0	24	97	0.247423	2	19	0.105263	20
chr1	13625013	-	T	chr1:13625013	Lactb2	SINE	UTR	3_prime_UTR_variant	0	0	13625721	708	upstream	UTR	-3.6469	0.00214	0.0268	0.0347	|	0.798548	0.303	0.174	0.042	|	3	64	0.046875	0	4	0	0	61	0	0	2	0	1	62	0.016129	0	5	0	7	96	0.0729167	2	21	0.0952381	6
chr1	13625015	-	T	chr1:13625015	Lactb2	SINE	UTR	3_prime_UTR_variant	0	0	13625718	703	upstream	UTR	-3.75549	0.0168	0.227	0.0909	|	0.398272	0.516	0.392	0.0831	|	15	63	0.238095	1	4	0.25	12	62	0.193548	0	2	0	10	62	0.16129	0	5	0	26	94	0.276596	2	22	0.0909091	26
chr1	13625036	-	T	chr1:13625036	Lactb2	SINE	UTR	3_prime_UTR_variant	1	1	-	-	-	-	-5.09463	0.00263	0.09	0.0185	|	-0.145393	0.346	0.383	0.651	|	2	64	0.03125	0	4	0	6	63	0.0952381	0	2	0	6	78	0.0769231	4	12	0.333333	11	101	0.108911	0	22	0	16
chr1	13625722	-	T	chr1:13625722	Lactb2	SINE	UTR	regulatory_region_variant	0	0	13625012	710	downstream	UTR	-4.22894	<0.001	0.0188	0.184	|	1.08044	0.28	0.132	0.16	|	3	35	0.0857143	0	1	0	4	32	0.125	---	---	---	2	26	0.0769231	0	1	0	0	38	0	---	---	---	2
chr1	13625735	-	T	chr1:13625735	Lactb2	SINE	UTR	regulatory_region_variant	0	0	13624998	737	downstream	UTR	-4.49621	<0.001	0.0226	0.187	|	0.0816813	0.306	0.289	0.862	|	0	37	0	0	1	0	6	33	0.181818	---	---	---	2	29	0.0689655	0	1	0	3	36	0.0833333	---	---	---	6
chr1	13625738	-	T	chr1:13625738	Lactb2	SINE	UTR	regulatory_region_variant	0	0	13624996	742	downstream	UTR	0	<0.001	<0.001	---	|	-0.795858	0.0188	0.0326	0.768	|	0	36	0	0	1	0	0	34	0	---	---	---	0	26	0	0	1	0	0	38	0	---	---	---	0
chr1	13625741	-	T	chr1:13625741	Lactb2	SINE	UTR	regulatory_region_variant	0	0	-	-	-	-	-5.34616	<0.001	0.0407	0.185	|	0.321288	0.712	0.57	0.0504	|	7	36	0.194444	0	1	0	6	34	0.176471	---	---	---	9	26	0.346154	0	1	0	5	38	0.131579	---	---	---	16
chr1	13625819	-	T	chr1:13625819	Lactb2	SINE	UTR	regulatory_region_variant	0	0	-	-	-	-	-3.85145	<0.001	0.0144	0.184	|	-1.88264	0.0401	0.148	0.28	|	6	40	0.15	---	---	---	1	19	0.0526316	0	1	0	2	35	0.0571429	0	4	0	6	46	0.130435	---	---	---	0
chr1	16567027	-	T	chr1:16567027	Ube2w	SINE	intergenic	non_coding_transcript_variant	0	0	16565323	1704	downstream	undefined	0	<0.001	<0.001	---	|	1.18709	0.00758	0.00333	0.193	|	0	8	0	0	5	0	0	6	0	0	5	0	0	10	0	0	2	0	0	4	0	0	0	---	---
chr1	16646834	-	T	chr1:16646834	Eloc	SINE	Intron	intron_variant	0	0	-	-	-	-	0	<0.001	<0.001	---	|	1.09704	0.0923	0.0431	0.594	|	0	10	0	0	57	0	0	6	0	0	43	0	0	6	0	0	24	0	0	1	0	0	29	0	0
chr1	16646835	-	T	chr1:16646835	Eloc	SINE	Intron	intron_variant	0	0	-	-	-	-	0	<0.001	<0.001	---	|	-0.94424	0.00672	0.0129	0.471	|	0	10	0	0	56	0	0	6	0	0	44	0	0	6	0	0	23	0	0	1	0	0	28	0	0
chr1	16646836	-	T	chr1:16646836	Eloc	SINE	Intron	non_coding_transcript_exon_variant	0	0	-	-	-	-	-0.237711	0.0019	0.00224	0.889	|	0.785347	0.456	0.264	0.122	|	0	10	0	0	56	0	0	6	0	2	43	0.0465116	0	6	0	0	24	0	0	1	0	0	29	0	0
chr1	32246078	+	A	chr1:32246078	Khdrbs2	LTR	UTR	3_prime_UTR_variant	0	0	-	-	-	-	0	<0.001	<0.001	---	|	1.1079	0.00216	<0.001	0.374	|	---	---	---	---	---	---	0	0	---	---	---	---	---	---	---	---	---	---	0	3	0	0	0	---	0
chr1	32246197	+	A	chr1:32246197	Khdrbs2	LTR	UTR	3_prime_UTR_variant	0	0	-	-	-	-	0	<0.001	<0.001	---	|	-0.873792	0.00504	0.00924	0.697	|	---	---	---	---	---	---	0	0	---	---	---	---	---	---	---	---	---	---	0	4	0	0	4	0	0
chr1	33769476	-	T	chr1:33769476	Zfp451	SINE	Intron	NMD_transcript_variant	1	1	-	-	-	-	0	<0.001	<0.001	---	|	2.11828	0.298	0.0686	0.298	|	0	4	0	0	8	0	0	6	0	0	13	0	0	3	0	0	15	0	0	1	0	0	10	0	0
chr1	33795199	-	T	chr1:33795199	Zfp451	SINE	UTR	3_prime_UTR_variant	1	1	-	-	-	-	0	<0.001	<0.001	---	|	-1.04218	<0.001	0.00206	0.374	|	0	5	0	0	5	0	0	4	0	0	3	0	0	3	0	0	3	0	0	5	0	0	0	---	0
chr1	33795208	-	T	chr1:33795208	Zfp451	SINE	UTR	3_prime_UTR_variant	1	1	-	-	-	-	0	<0.001	<0.001	---	|	-1.10915	0.0184	0.0398	0.674	|	0	4	0	0	4	0	0	3	0	0	3	0	0	3	0	0	2	0	0	4	0	0	0	---	0
chr1	33796391	-	T	chr1:33796391	Zfp451	SINE	UTR	3_prime_UTR_variant	0	0	-	-	-	-	0	<0.001	<0.001	---	|	2.9898	0.12	0.0151	0.107	|	0	9	0	0	5	0	0	2	0	0	8	0	0	13	0	0	5	0	0	2	0	0	0	---	0
chr1	33796409	-	T	chr1:33796409	Zfp451	SINE	UTR	3_prime_UTR_variant	0	0	-	-	-	-	0	<0.001	<0.001	---	|	2.84346	0.0159	0.00221	0.132	|	0	8	0	0	4	0	0	4	0	0	8	0	0	12	0	0	5	0	0	2	0	0	0	---	0
chr1	36526757	+	A	chr1:36526757	Ankrd23,Cnnm3,Gm38033,Gm42417	LINE	UTR	3_prime_UTR_variant	0	0	-	-	-	-	-6.38192	<0.001	0.0834	1.7e-05	|	-0.275081	0.0039	0.00472	0.874	|	2	68	0.0294118	0	19	0	4	55	0.0727273	0	17	0	7	82	0.0853659	0	12	0	10	122	0.0819672	0	47	0	11
chr1	36694571	+	A	chr1:36694571	Actr1b,Cox5b	SINE	intergenic	downstream_gene_variant	0	0	-	-	-	-	-1.84521	<0.001	0.00359	0.391	|	2.60806	0.0277	0.00455	0.168	|	0	4	0	---	---	---	1	6	0.166667	0	2	0	0	8	0	0	5	0	0	6	0	0	17	0	0
chr1	36694635	+	A	chr1:36694635	Actr1b,Cox5b	SINE	intergenic	downstream_gene_variant	0	0	36693613	1022	upstream	UTR	-2.09521	<0.001	0.00427	0.391	|	1.81319	0.0203	0.00577	0.307	|	0	1	0	---	---	---	0	3	0	0	0	---	3	9	0.333333	0	2	0	0	4	0	0	6	0	3
chr1	37386254	+	A	chr1:37386254	Inpp4a	SINE	Intron	regulatory_region_variant	0	0	-	-	-	-	0	<0.001	<0.001	---	|	2.54018	0.0556	0.00956	0.193	|	0	35	0	0	36	0	0	43	0	0	14	0	0	32	0	0	12	0	0	2	0	0	0	---	0
chr1	37442392	-	T	chr1:37442392	Mgat4a,Unc50	.	UTR	3_prime_UTR_variant	0	0	37443138	746	upstream	UTR	-1.02966	0.0839	0.171	0.432	|	0.990444	0.0284	0.0143	0.504	|	26	170	0.152941	11	93	0.11828	8	105	0.0761905	12	59	0.20339	29	141	0.205674	12	95	0.126316	20	62	0.322581	4	19	0.210526	5
chr1	37442393	-	T	chr1:37442393	Mgat4a,Unc50	.	UTR	3_prime_UTR_variant	0	0	37443137	744	upstream	UTR	-1.73108	0.0739	0.245	0.199	|	0.48158	0.0394	0.0282	0.551	|	40	169	0.236686	7	93	0.0752688	25	106	0.235849	15	58	0.258621	38	141	0.269504	12	95	0.126316	18	61	0.295082	4	22	0.181818	5
chr1	37442398	-	T	chr1:37442398	Mgat4a,Unc50	.	UTR	3_prime_UTR_variant	0	0	-	-	-	-	-1.07737	0.0193	0.0407	0.666	|	0.624766	0.0168	0.0109	0.684	|	22	166	0.13253	1	95	0.0105263	17	109	0.155963	6	59	0.101695	9	142	0.0633803	6	88	0.0681818	4	64	0.0625	0	22	0	0
chr1	37442400	-	T	chr1:37442400	Mgat4a,Unc50	.	UTR	3_prime_UTR_variant	0	0	37443774	1374	upstream	UTR	-2.54942	0.0018	0.0106	0.0802	|	0	<0.001	<0.001	---	|	3	170	0.0176471	0	94	0	4	111	0.036036	2	58	0.0344828	4	141	0.0283688	0	89	0	5	65	0.0769231	0	25	0	0
chr1	37442401	-	T	chr1:37442401	Mgat4a,Unc50	.	UTR	3_prime_UTR_variant	0	0	37443774	1373	upstream	UTR	-0.928696	0.0072	0.0137	0.249	|	-2.54229	0.00625	0.0364	0.166	|	13	171	0.0760234	2	97	0.0206186	7	111	0.0630631	7	59	0.118644	13	145	0.0896552	5	88	0.0568182	1	65	0.0153846	0	25	0	0
chr1	37443158	-	T	chr1:37443158	Mgat4a,Unc50	.	UTR	3_prime_UTR_variant	0	0	37442377	781	downstream	UTR	-1.66617	0.0193	0.0612	0.274	|	0.568708	0.0191	0.0129	0.775	|	26	104	0.25	5	40	0.125	18	81	0.222222	5	27	0.185185	10	76	0.131579	3	26	0.115385	2	17	0.117647	0	2	0	---
chr1	37984005	-	T	chr1:37984005	Txndc9	SINE	intergenic	downstream_gene_variant	1	1	-	-	-	-	0	<0.001	<0.001	---	|	-3.63721	0.0179	0.223	0.135	|	0	3	0	0	7	0	0	4	0	0	14	0	0	5	0	0	1	0	0	8	0	---	---	---	---
chr1	37984677	-	T	chr1:37984677	Txndc9	SINE	intergenic	downstream_gene_variant	1	1	-	-	-	-	0	<0.001	<0.001	---	|	0.194397	0.944	0.825	0.29	|	0	0	---	0	2	0	0	1	0	---	---	---	0	3	0	0	3	0	0	4	0	---	---	---	---
chr1	51468579	-	T	chr1:51468579	Nabp1	SINE	intergenic	regulatory_region_variant	0	0	51466979	1600	downstream	undefined	0.660061	0.0188	0.0119	0.338	|	-1.17549	0.108	0.245	0.572	|	4	19	0.210526	1	4	0.25	0	3	0	0	1	0	2	21	0.0952381	3	6	0.5	---	---	---	---	---	---	---
chr1	52160303	+	A	chr1:52160303	Gls,Gm28177,Stat1	SINE	UTR	3_prime_UTR_variant	0	0	-	-	-	-	-0.408347	<0.001	0.00133	0.363	|	-1.79518	0.00778	0.027	0.338	|	1	183	0.00546448	0	7	0	0	158	0	0	4	0	0	219	0	0	13	0	0	349	0	0	47	0	0
chr1	52187395	-	T	chr1:52187395	Gls	.	UTR	3_prime_UTR_variant	0	0	52187409	14	upstream	UTR	-5.04678	<0.001	0.0331	0.0292	|	0.48747	0.0177	0.0126	0.828	|	1	25	0.04	0	7	0	2	5	0.4	0	18	0	4	16	0.25	0	15	0	15	46	0.326087	0	8	0	0
chr1	54397335	-	T	chr1:54397335	Gtf3c3	SINE	UTR	3_prime_UTR_variant	0	0	-	-	-	-	-8.31327	<0.001	0.318	3.5e-05	|	-1.70179	0.00219	0.00711	0.202	|	5	22	0.227273	0	10	0	5	18	0.277778	0	4	0	7	24	0.291667	0	4	0	1	16	0.0625	0	15	0	4
chr1	54646217	-	T	chr1:54646217	Ankrd44	.	UTR	3_prime_UTR_variant	0	0	-	-	-	-	-0.694303	0.00336	0.00544	0.498	|	-0.769369	<0.001	0.0017	0.374	|	11	561	0.0196078	2	75	0.0266667	5	473	0.0105708	2	37	0.0540541	6	610	0.00983607	0	62	0	5	394	0.0126904	0	46	0	0
chr1	54646250	-	T	chr1:54646250	Ankrd44	.	UTR	3_prime_UTR_variant	0	0	-	-	-	-	-2.55794	<0.001	0.00589	0.0379	|	0.653069	0.00157	<0.001	0.374	|	8	514	0.0155642	0	59	0	4	418	0.00956938	0	30	0	3	532	0.0056391	0	49	0	0	361	0	0	39	0	7
chr1	58413932	-	T	chr1:58413932	Clk1	SINE	Intron	non_coding_transcript_variant	0	0	58414202	270	upstream	intronic	3.18538	0.0091	<0.001	0.00755	|	5.66322	0.133	0.00263	0.0181	|	0	76	0	5	921	0.00542888	0	63	0	7	689	0.0101597	0	75	0	12	796	0.0150754	0	86	0	6	168	0.0357143	0
chr1	58415960	-	T	chr1:58415960	Clk1	SINE	Intron	regulatory_region_variant	0	0	-	-	-	-	0.310053	0.00124	<0.001	0.178	|	2.30548	0.0398	0.00805	0.191	|	0	242	0	2	1123	0.00178094	0	207	0	0	823	0	0	334	0	2	981	0.00203874	0	110	0	0	74	0	0
chr1	58415989	-	T	chr1:58415989	Clk1	SINE	Intron	regulatory_region_variant	1	1	-	-	-	-	0.833046	0.00178	<0.001	0.183	|	2.26273	0.0142	0.00296	0.0712	|	0	233	0	0	1053	0	0	196	0	6	783	0.00766284	0	313	0	4	959	0.00417101	0	134	0	0	82	0	0
chr1	58416379	-	T	chr1:58416379	Clk1	SINE	Intron	regulatory_region_variant	0	0	58415649	730	downstream	intronic	0.777456	0.00258	0.00151	0.487	|	1.52189	0.0473	0.0165	0.257	|	0	257	0	11	1123	0.00979519	0	166	0	5	657	0.00761035	0	255	0	4	1011	0.00395648	0	132	0	0	154	0	0
chr1	58416382	-	T	chr1:58416382	Clk1	SINE	Intron	regulatory_region_variant	0	0	58415647	735	downstream	intronic	2.59694	0.00762	0.00126	0.0817	|	-0.488389	0.0302	0.0424	0.446	|	0	256	0	15	1119	0.0134048	0	165	0	10	647	0.015456	1	251	0.00398406	6	1002	0.00598802	0	132	0	0	159	0	0
chr1	58416383	-	T	chr1:58416383	Clk1	SINE	Intron	regulatory_region_variant	0	0	58415647	736	downstream	intronic	1.10555	0.00215	<0.001	0.0797	|	2.28987	0.0182	0.00371	0.313	|	0	253	0	4	1118	0.00357782	0	162	0	3	652	0.00460123	0	252	0	6	995	0.00603015	0	131	0	0	159	0	0
chr1	58416391	-	T	chr1:58416391	Clk1	SINE	Intron	regulatory_region_variant	0	0	-	-	-	-	-0.35821	0.000983	0.00126	0.363	|	2.4344	0.0123	0.00228	0.202	|	1	250	0.004	1	1109	0.000901713	0	183	0	0	654	0	0	264	0	0	1027	0	0	140	0	0	174	0	0
chr1	58416392	-	T	chr1:58416392	Clk1	SINE	Intron	regulatory_region_variant	0	0	-	-	-	-	0.504636	0.00142	<0.001	0.392	|	1.78885	0.0133	0.00386	0.435	|	0	245	0	1	1105	0.000904977	0	183	0	6	654	0.00917431	0	264	0	1	1018	0.000982318	0	140	0	0	175	0	0
chr1	58462161	+	A	chr1:58462161	Gm23966,Nif3l1,Orc2	SINE	UTR	3_prime_UTR_variant	0	0	-	-	-	-	0	<0.001	<0.001	---	|	3.69156	0.0302	0.00234	0.0437	|	0	7	0	0	0	---	0	1	0	0	2	0	0	13	0	0	8	0	0	17	0	0	13	0	0
chr1	58463428	-	T	chr1:58463428	Gm23966,Nif3l1,Orc2	SINE	UTR	3_prime_UTR_variant	0	0	-	-	-	-	0	<0.001	<0.001	---	|	1.71786	0.0165	0.00501	0.153	|	0	53	0	0	8	0	0	46	0	0	6	0	0	76	0	0	7	0	0	111	0	0	23	0	0
chr1	59712745	+	A	chr1:59712745	Nop58	SINE	UTR	3_prime_UTR_variant	0	0	-	-	-	-	0.305598	0.00562	0.00455	0.941	|	-1.3046	0.0342	0.0845	0.464	|	0	0	---	---	---	---	0	1	0	0	0	---	0	3	0	0	0	---	0	2	0	1	1	1	---
chr1	59712975	+	A	chr1:59712975	Nop58	SINE	UTR	3_prime_UTR_variant	0	0	59712797	178	upstream	UTR	1.66096	0.00316	<0.001	0.363	|	0.156595	0.124	0.111	0.719	|	0	3	0	0	2	0	0	0	---	0	2	0	0	2	0	0	0	---	0	4	0	0	6	0	0
chr1	59716768	+	A	chr1:59716768	Nop58	SINE	UTR	3_prime_UTR_variant	0	0	59718824	2056	downstream	UTR	0	<0.001	<0.001	---	|	1.02497	0.00955	0.00469	0.637	|	0	2	0	---	---	---	0	1	0	0	0	---	0	1	0	0	0	---	0	2	0	0	5	0	---
chr1	59717041	+	A	chr1:59717041	Nop58	SINE	UTR	3_prime_UTR_variant	0	0	59718730	1689	downstream	UTR	0	<0.001	<0.001	---	|	-0.208378	0.0132	0.0152	0.915	|	0	0	---	---	---	---	0	0	---	0	0	---	0	0	---	0	0	---	0	3	0	0	0	---	---
chr1	59717839	+	A	chr1:59717839	Nop58	LTR	UTR	3_prime_UTR_variant	0	0	59718782	943	downstream	UTR	0	<0.001	<0.001	---	|	0.689835	0.0788	0.0489	0.662	|	0	2	0	0	2	0	0	0	---	0	0	---	0	1	0	0	0	---	0	4	0	0	0	---	7
chr1	59874208	+	A	chr1:59874208	Bmpr2	SINE	UTR	regulatory_region_variant	0	0	-	-	-	-	-1.14524	0.0161	0.0357	0.518	|	1.03553	0.424	0.207	0.053	|	12	57	0.210526	3	13	0.230769	1	18	0.0555556	0	20	0	5	36	0.138889	5	17	0.294118	4	8	0.5	---	---	---	---
chr1	60015561	-	T	chr1:60015561	Ica1l	SINE	Intron	regulatory_region_variant	0	0	-	-	-	-	0	<0.001	<0.001	---	|	1.44856	0.0129	0.00474	0.246	|	0	0	---	0	0	---	0	0	---	0	0	---	0	0	---	0	0	---	0	0	---	0	0	---	0
chr1	60387531	+	A	chr1:60387531	Cyp20a1	SINE	UTR	3_prime_UTR_variant	0	0	-	-	-	-	-0.363411	0.00376	0.00484	0.857	|	0.788622	0.194	0.112	0.151	|	0	35	0	---	---	---	0	21	0	0	0	---	0	27	0	0	8	0	5	43	0.116279	0	5	0	0
chr1	60478589	+	A	chr1:60478589	Abi2,Raph1	SINE	UTR	3_prime_UTR_variant	0	0	-	-	-	-	0	<0.001	<0.001	---	|	1.41877	0.151	0.0563	0.0104	|	0	3	0	0	2	0	0	14	0	0	3	0	0	12	0	0	2	0	0	5	0	0	7	0	0
chr1	60478590	+	A	chr1:60478590	Abi2,Raph1	SINE	UTR	3_prime_UTR_variant	0	0	-	-	-	-	-1.27398	<0.001	0.00242	0.363	|	0.824405	0.307	0.174	0.0102	|	0	3	0	0	2	0	0	14	0	0	3	0	0	12	0	0	2	0	1	5	0.2	0	7	0	0
chr1	63048306	-	T	chr1:63048306	Ino80d	.	UTR	3_prime_UTR_variant	0	0	-	-	-	-	-2.40206	0.0022	0.0116	0.055	|	-0.779939	<0.001	0.00172	0.374	|	13	236	0.0550847	3	258	0.0116279	6	204	0.0294118	0	239	0	2	255	0.00784314	3	305	0.00983607	10	251	0.0398406	0	378	0	1
chr1	63048307	-	T	chr1:63048307	Ino80d	.	UTR	3_prime_UTR_variant	0	0	-	-	-	-	-2.35772	0.0108	0.0555	0.00285	|	-2.3113	<0.001	0.00496	0.0741	|	26	238	0.109244	4	260	0.0153846	20	207	0.0966184	2	238	0.00840336	15	257	0.0583658	12	306	0.0392157	6	251	0.0239044	1	376	0.00265957	13
chr1	63049607	-	T	chr1:63049607	Ino80d	.	UTR	3_prime_UTR_variant	0	0	-	-	-	-	-2.13389	0.00515	0.0226	0.111	|	-0.754166	0.00556	0.00938	0.736	|	9	101	0.0891089	11	146	0.0753425	5	59	0.0847458	1	93	0.0107527	12	82	0.146341	3	131	0.0229008	6	50	0.12	0	27	0	0
chr1	63117003	+	A	chr1:63117003	Gm20342,Ino80d,Ino80dos	SINE	Intron	non_coding_transcript_variant	1	1	-	-	-	-	2.05491	0.491	0.118	0.244	|	-0.11862	0.893	0.97	0.011	|	16	62	0.258065	42	82	0.512195	12	42	0.285714	14	32	0.4375	17	49	0.346939	19	44	0.431818	6	10	0.6	6	27	0.222222	0
chr1	63117047	+	A	chr1:63117047	Gm20342,Ino80d,Ino80dos	SINE	Intron	non_coding_transcript_variant	1	1	63117631	584	downstream	exonic	6.54076	0.15	0.00161	0.000157	|	2.07783	0.209	0.0496	0.276	|	0	73	0	15	116	0.12931	1	58	0.0172414	15	51	0.294118	0	61	0	6	65	0.0923077	0	23	0	1	20	0.05	0
chr1	63117052	+	A	chr1:63117052	Gm20342,Ino80d,Ino80dos	SINE	Intron	non_coding_transcript_variant	1	1	63117626	574	downstream	exonic	2.66281	0.0176	0.00278	0.103	|	-3.14148	0.0151	0.133	0.0886	|	1	75	0.0133333	4	114	0.0350877	0	60	0	3	50	0.06	2	58	0.0344828	5	71	0.0704225	0	22	0	5	25	0.2	0
chr1	63117112	+	A	chr1:63117112	Gm20342,Ino80d,Ino80dos	SINE	Intron	non_coding_transcript_variant	0	0	-	-	-	-	-0.178958	0.00273	0.00309	0.881	|	-0.462068	0.00174	0.0024	0.794	|	1	66	0.0151515	0	103	0	3	52	0.0576923	1	56	0.0178571	0	65	0	2	86	0.0232558	0	38	0	0	20	0	0
chr1	63117242	+	A	chr1:63117242	Gm20342,Ino80d,Ino80dos	SINE	Exon	non_coding_transcript_exon_variant	0	0	63117633	391	downstream	exonic	2.67114	0.0231	0.00363	0.135	|	-0.326597	0.0122	0.0154	0.91	|	2	28	0.0714286	2	44	0.0454545	0	31	0	1	13	0.0769231	1	31	0.0322581	7	43	0.162791	0	69	0	0	14	0	0
chr1	63117284	+	A	chr1:63117284	Gm20342,Ino80d,Ino80dos	SINE	Exon	non_coding_transcript_exon_variant	1	1	63117593	309	downstream	exonic	3.92624	0.272	0.0179	0.0383	|	2.12871	0.271	0.0619	0.256	|	3	19	0.157895	7	41	0.170732	2	26	0.0769231	3	17	0.176471	0	33	0	19	41	0.463415	2	57	0.0350877	6	9	0.666667	2
chr1	63117576	+	A	chr1:63117576	Gm20342,Ino80d,Ino80dos	SINE	Exon	non_coding_transcript_exon_variant	0	0	-	-	-	-	3.36185	0.0997	0.0097	0.221	|	0.0380142	0.0316	0.0308	0.992	|	0	9	0	9	36	0.25	0	23	0	4	11	0.363636	2	12	0.166667	13	30	0.433333	3	40	0.075	0	8	0	6
chr1	63117577	+	A	chr1:63117577	Gm20342,Ino80d,Ino80dos	SINE	Exon	non_coding_transcript_exon_variant	0	0	-	-	-	-	3.07451	0.0642	0.00762	0.237	|	1.32877	0.00251	<0.001	0.374	|	1	9	0.111111	5	36	0.138889	0	22	0	2	11	0.181818	0	13	0	10	30	0.333333	1	40	0.025	0	8	0	6
chr1	74267434	+	A	chr1:74267434	Arpc2	SINE	Intron	intron_variant	0	0	74265896	1538	upstream	intronic	1.58055	0.019	0.00634	0.0282	|	3.58344	0.129	0.0108	0.072	|	1	164	0.00609756	15	242	0.0619835	2	136	0.0147059	4	168	0.0238095	2	172	0.0116279	4	192	0.0208333	1	180	0.00555556	5	165	0.030303	1
chr1	74279906	-	T	chr1:74279906	Aamp,Gm28364,Gpbar1	.	UTR	3_prime_UTR_variant	0	0	-	-	-	-	-2.49847	0.00192	0.0108	0.0994	|	-1.03451	0.00274	0.00561	0.282	|	0	77	0	0	7	0	0	48	0	0	4	0	3	49	0.0612245	0	5	0	5	327	0.0152905	0	86	0	16
chr1	75139302	-	T	chr1:75139302	Cnppd1,Retreg2	SINE	Intron	intron_variant	1	1	-	-	-	-	-0.952976	<0.001	0.00194	0.363	|	0.471792	0.105	0.0758	0.846	|	0	48	0	0	125	0	0	23	0	0	89	0	0	23	0	0	92	0	1	19	0.0526316	0	20	0	0
chr1	75252513	-	T	chr1:75252513	Gm28294,Ptprn	.	Exon	missense_variant	0	0	-	-	-	-	0	<0.001	<0.001	---	|	0.919263	0.0148	0.00781	0.232	|	0	0	---	0	4	0	0	0	---	0	0	---	0	2	0	0	0	---	0	2	0	0	25	0	0
chr1	75509436	+	A	chr1:75509436	Gm15181,Inha,Obsl1	.	Exon	missense_variant	0	0	-	-	-	-	0	<0.001	<0.001	---	|	2.11625	0.012	0.00277	0.15	|	---	---	---	---	---	---	---	---	---	---	---	---	0	1	0	---	---	---	0	2	0	0	2	0	0
chr1	79701631	-	T	chr1:79701631	Wdfy1	SINE	intergenic	downstream_gene_variant	1	1	-	-	-	-	-1.32877	<0.001	0.00251	0.374	|	-0.481436	0.417	0.582	0.271	|	0	4	0	0	10	0	1	10	0.1	0	14	0	0	2	0	0	4	0	0	3	0	0	0	---	0
chr1	79704070	-	T	chr1:79704070	Wdfy1	SINE	UTR	3_prime_UTR_variant	0	0	-	-	-	-	0.443828	0.00296	0.00217	0.841	|	-1.30395	0.0139	0.0342	0.482	|	0	5	0	0	1	0	0	16	0	0	1	0	0	9	0	0	3	0	2	19	0.105263	0	0	---	0
chr1	79704080	-	T	chr1:79704080	Wdfy1	SINE	UTR	3_prime_UTR_variant	0	0	-	-	-	-	-0.538136	0.00296	0.00429	0.828	|	-0.0634827	0.149	0.156	0.897	|	0	7	0	0	3	0	0	16	0	0	2	0	0	12	0	0	3	0	1	20	0.05	0	1	0	0
chr1	79704082	-	T	chr1:79704082	Wdfy1	SINE	UTR	3_prime_UTR_variant	0	0	-	-	-	-	0	<0.001	<0.001	---	|	-0.334794	0.00925	0.0117	0.866	|	0	8	0	0	3	0	0	16	0	0	2	0	0	12	0	0	3	0	0	21	0	0	1	0	0
chr1	79704099	-	T	chr1:79704099	Wdfy1	SINE	UTR	3_prime_UTR_variant	0	0	-	-	-	-	0	<0.001	<0.001	---	|	1.96975	0.0343	0.00875	0.143	|	0	12	0	0	6	0	0	25	0	0	6	0	0	20	0	0	4	0	0	23	0	0	7	0	0
chr1	79704144	-	T	chr1:79704144	Wdfy1	SINE	UTR	3_prime_UTR_variant	0	0	-	-	-	-	-0.613397	<0.001	0.00153	0.363	|	-0.413907	0.0154	0.0205	0.738	|	0	61	0	0	14	0	0	80	0	0	14	0	1	78	0.0128205	0	9	0	0	45	0	0	21	0	0
chr1	79794474	-	T	chr1:79794474	Serpine2	.	UTR	3_prime_UTR_variant	0	0	-	-	-	-	1.56771	0.012	0.00406	0.0898	|	-0.757173	0.00337	0.0057	0.0878	|	0	48	0	1	72	0.0138889	0	28	0	0	50	0	1	60	0.0166667	4	74	0.0540541	3	134	0.0223881	2	168	0.0119048	3
chr1	79794495	-	T	chr1:79794495	Serpine2	.	UTR	3_prime_UTR_variant	0	0	-	-	-	-	-1.62734	0.00914	0.0282	0.218	|	-1.03841	0.00873	0.0179	0.0907	|	7	45	0.155556	4	67	0.0597015	3	26	0.115385	1	48	0.0208333	4	61	0.0655738	0	58	0	2	116	0.0172414	2	146	0.0136986	1
chr1	84732025	-	T	chr1:84732025	Trip12	.	Exon	missense_variant	0	0	-	-	-	-	-0.694687	0.00261	0.00422	0.632	|	-0.490645	0.00129	0.00181	0.516	|	4	599	0.0066778	9	342	0.0263158	2	466	0.00429185	0	287	0	2	590	0.00338983	0	368	0	0	424	0	2	168	0.0119048	0
chr1	84904254	-	T	chr1:84904254	Fbxo36,Slc16a14	SINE	intergenic	downstream_gene_variant	0	0	84905209	955	upstream	undefined	0	<0.001	<0.001	---	|	0.304338	0.0765	0.062	0.535	|	0	3	0	0	0	---	0	0	---	---	---	---	0	4	0	---	---	---	---	---	---	---	---	---	0
chr1	84906005	-	T	chr1:84906005	Slc16a14	SINE	UTR	3_prime_UTR_variant	0	0	-	-	-	-	3.32193	0.01	<0.001	0.423	|	1.3568	0.0194	0.00759	0.529	|	0	3	0	0	0	---	0	10	0	---	---	---	0	5	0	---	---	---	---	---	---	---	---	---	0
chr1	85088632	-	T	chr1:85088632	A530032D15Rik,C130026I21Rik	.	UTR	3_prime_UTR_variant	0	0	-	-	-	-	-0.602869	0.162	0.247	0.197	|	3.71247	0.0522	0.00398	0.19	|	28	105	0.266667	13	71	0.183099	24	92	0.26087	13	53	0.245283	41	128	0.320312	14	57	0.245614	23	152	0.151316	17	67	0.253731	23
chr1	85579191	-	T	chr1:85579191	G530012D18Rik,Sp110	.	Exon	missense_variant	0	0	-	-	-	-	0.987565	0.0756	0.0381	0.091	|	-1.65383	0.00534	0.0168	0.282	|	13	559	0.0232558	5	82	0.0609756	7	515	0.0135922	2	66	0.030303	18	688	0.0261628	8	72	0.111111	90	1119	0.080429	13	39	0.333333	40
chr1	86343787	-	T	chr1:86343787	Ncl	SINE	intergenic	regulatory_region_variant	0	0	86345161	1374	upstream	UTR	-4.40241	<0.001	0.0211	0.185	|	0.946522	0.343	0.178	0.105	|	1	4	0.25	0	10	0	4	5	0.8	0	14	0	0	5	0	0	4	0	0	0	---	---	---	---	0
chr1	86343788	-	T	chr1:86343788	Ncl	SINE	intergenic	regulatory_region_variant	0	0	86345159	1371	upstream	UTR	-5.17001	0.00346	0.124	0.113	|	0.512009	0.468	0.328	0.0538	|	2	4	0.5	0	10	0	4	5	0.8	2	14	0.142857	3	5	0.6	0	4	0	0	0	---	---	---	---	0
chr1	86343854	-	T	chr1:86343854	Ncl	SINE	intergenic	regulatory_region_variant	0	0	-	-	-	-	0	<0.001	<0.001	---	|	0	<0.001	<0.001	---	|	0	8	0	0	6	0	0	4	0	0	12	0	0	7	0	0	2	0	0	3	0	0	6	0	0
chr1	86343863	-	T	chr1:86343863	Ncl	SINE	intergenic	regulatory_region_variant	0	0	86341491	2372	downstream	undefined	-1.43169	<0.001	0.0027	0.374	|	-1.88366	0.0119	0.0439	0.47	|	1	7	0.142857	0	6	0	0	5	0	0	12	0	0	4	0	0	2	0	0	4	0	0	8	0	0
chr1	86345239	-	T	chr1:86345239	Ncl	SINE	UTR	regulatory_region_variant	1	1	86347715	2476	upstream	UTR	0.24718	0.00227	0.00191	0.887	|	-4.06932	<0.001	0.0168	0.0715	|	0	4	0	0	12	0	0	5	0	0	3	0	0	7	0	0	7	0	4	82	0.0487805	0	48	0	0
chr1	86345270	-	T	chr1:86345270	Ncl	.	UTR	regulatory_region_variant	0	0	-	-	-	-	0.859738	0.00181	<0.001	0.363	|	1.33924	0.0603	0.0238	0.258	|	0	9	0	0	11	0	0	10	0	0	3	0	0	7	0	0	16	0	0	80	0	0	48	0	0
chr1	86345897	-	T	chr1:86345897	Ncl	SINE	UTR	regulatory_region_variant	0	0	86347744	1847	upstream	UTR	0	<0.001	<0.001	---	|	1.30093	0.00602	0.00244	0.471	|	0	14	0	0	23	0	0	13	0	0	14	0	0	25	0	0	16	0	0	25	0	0	23	0	0
chr1	86345904	-	T	chr1:86345904	Ncl	SINE	UTR	regulatory_region_variant	0	0	86347736	1832	upstream	UTR	3.76866	0.0136	<0.001	0.0894	|	2.22751	0.0278	0.00593	0.0879	|	0	14	0	1	26	0.0384615	0	14	0	2	12	0.166667	0	23	0	0	17	0	0	22	0	0	19	0	0
chr1	86345908	-	T	chr1:86345908	Ncl	SINE	UTR	regulatory_region_variant	0	0	86347731	1823	upstream	UTR	0.14742	0.00206	0.00186	0.926	|	2.17284	0.0781	0.0173	0.0843	|	0	16	0	2	26	0.0769231	0	13	0	0	11	0	1	24	0.0416667	0	18	0	0	26	0	0	19	0	0
chr1	86345911	-	T	chr1:86345911	Ncl	SINE	UTR	regulatory_region_variant	1	1	86347726	1815	upstream	UTR	-0.0867551	0.0545	0.0579	0.973	|	0.461592	0.596	0.433	0.0061	|	3	15	0.2	6	26	0.230769	1	12	0.0833333	4	11	0.363636	4	25	0.16	0	18	0	3	29	0.103448	0	19	0	3
chr1	86345916	-	T	chr1:86345916	Ncl	SINE	UTR	regulatory_region_variant	1	1	86347724	1808	upstream	UTR	0.251884	0.0292	0.0245	0.923	|	1.07749	0.344	0.163	0.0378	|	0	15	0	3	26	0.115385	1	10	0.1	2	11	0.181818	0	21	0	2	17	0.117647	3	28	0.107143	0	19	0	2
chr1	86345930	-	T	chr1:86345930	Ncl	SINE	UTR	regulatory_region_variant	1	1	-	-	-	-	-2.37675	0.00897	0.0466	0.317	|	1.00012	0.408	0.204	0.0281	|	2	16	0.125	1	24	0.0416667	1	10	0.1	2	10	0.2	4	23	0.173913	0	18	0	1	29	0.0344828	0	19	0	3
chr1	86347725	-	T	chr1:86347725	Gm24148,Mir3535,Ncl,Snora75	SINE	UTR	regulatory_region_variant	0	0	86345913	1812	downstream	UTR	0	<0.001	<0.001	---	|	1.05014	0.00779	0.00376	0.547	|	0	12	0	0	11	0	0	8	0	0	7	0	0	15	0	0	7	0	0	22	0	0	8	0	0
chr1	86347730	-	T	chr1:86347730	Gm24148,Mir3535,Ncl,Snora75	SINE	UTR	regulatory_region_variant	0	0	-	-	-	-	0	<0.001	<0.001	---	|	3.17577	0.017	0.00189	0.0656	|	0	14	0	0	13	0	0	9	0	0	7	0	0	22	0	0	11	0	0	24	0	0	9	0	0
chr1	86347736	-	T	chr1:86347736	Gm24148,Mir3535,Ncl,Snora75	SINE	UTR	regulatory_region_variant	0	0	-	-	-	-	-0.174066	0.00212	0.00239	0.927	|	1.58639	0.134	0.0446	0.0211	|	3	16	0.1875	0	13	0	0	12	0	0	7	0	0	25	0	1	11	0.0909091	0	25	0	0	12	0	0
chr1	86347737	-	T	chr1:86347737	Gm24148,Mir3535,Ncl,Snora75	SINE	UTR	regulatory_region_variant	1	1	-	-	-	-	-1.57087	0.00497	0.0148	0.536	|	1.07862	0.213	0.101	0.175	|	3	16	0.1875	0	13	0	4	12	0.333333	0	7	0	4	24	0.166667	1	11	0.0909091	0	25	0	2	12	0.166667	0
chr1	86347759	-	T	chr1:86347759	Gm24148,Mir3535,Ncl,Snora75	SINE	UTR	regulatory_region_variant	0	0	86345880	1879	downstream	UTR	-1.19307	<0.001	0.00229	0.363	|	2.55343	0.0422	0.00718	0.168	|	0	20	0	0	17	0	0	16	0	0	11	0	0	33	0	0	14	0	0	44	0	0	11	0	1
chr1	86347801	-	T	chr1:86347801	Gm24148,Mir3535,Ncl,Snora75	SINE	UTR	regulatory_region_variant	0	0	-	-	-	-	-4.02235	<0.001	0.0162	0.0263	|	-0.257313	0.0116	0.0138	0.873	|	2	33	0.0606061	0	24	0	2	22	0.0909091	0	17	0	4	42	0.0952381	0	21	0	2	57	0.0350877	0	11	0	0
chr1	86347802	-	T	chr1:86347802	Gm24148,Mir3535,Ncl,Snora75	SINE	UTR	regulatory_region_variant	0	0	-	-	-	-	-3.27756	0.00964	0.0935	0.079	|	0.55287	0.286	0.195	0.129	|	12	34	0.352941	0	24	0	8	22	0.363636	1	17	0.0588235	8	41	0.195122	3	20	0.15	11	59	0.186441	1	11	0.0909091	1
chr1	86347820	-	T	chr1:86347820	Gm24148,Mir3535,Ncl,Snora75	SINE	UTR	regulatory_region_variant	0	0	-	-	-	-	0	<0.001	<0.001	---	|	0.52747	0.0536	0.0372	0.295	|	0	35	0	0	24	0	0	23	0	0	16	0	0	45	0	0	22	0	0	64	0	0	9	0	0
chr1	86347926	-	T	chr1:86347926	Gm24148,Mir3535,Ncl,Snora75	SINE	UTR	regulatory_region_variant	0	0	86348806	880	upstream	UTR	-1.12606	<0.001	0.00218	0.363	|	2.74177	0.0615	0.00919	0.0568	|	0	16	0	0	16	0	0	14	0	0	13	0	0	26	0	0	24	0	4	37	0.108108	0	15	0	0
chr1	86347927	-	T	chr1:86347927	Gm24148,Mir3535,Ncl,Snora75	SINE	UTR	regulatory_region_variant	0	0	86348805	878	upstream	UTR	1.07254	0.00461	0.00219	0.625	|	0.155079	0.021	0.0189	0.916	|	0	16	0	1	16	0.0625	0	14	0	2	13	0.153846	0	26	0	0	24	0	4	36	0.111111	0	15	0	0
chr1	86347967	-	T	chr1:86347967	Gm24148,Mir3535,Ncl,Snora75	SINE	UTR	regulatory_region_variant	1	1	86348743	776	upstream	UTR	0.653565	0.00407	0.00259	0.774	|	1.40145	0.11	0.0416	0.0783	|	3	10	0.3	0	11	0	0	8	0	1	11	0.0909091	0	16	0	1	20	0.05	0	24	0	0	9	0	0
chr1	86347983	-	T	chr1:86347983	Gm24148,Mir3535,Ncl,Snora75	SINE	UTR	regulatory_region_variant	0	0	-	-	-	-	0	<0.001	<0.001	---	|	-2.21401	0.00577	0.0268	0.198	|	0	8	0	0	10	0	0	6	0	0	9	0	0	10	0	0	13	0	0	16	0	0	5	0	0
chr1	86348806	-	T	chr1:86348806	Gm24148,Mir3535,Ncl,Snora75	SINE	UTR	regulatory_region_variant	1	1	-	-	-	-	-4.81127	<0.001	0.0281	0.0312	|	0.68504	0.538	0.335	0.00602	|	5	21	0.238095	0	17	0	1	25	0.04	0	8	0	2	25	0.08	0	15	0	9	14	0.642857	0	11	0	0
chr1	86348814	-	T	chr1:86348814	Gm24148,Mir3535,Ncl,Snora75	SINE	UTR	regulatory_region_variant	1	1	-	-	-	-	0	<0.001	<0.001	---	|	1.64576	0.0059	0.00189	0.408	|	0	19	0	0	15	0	0	25	0	0	8	0	0	25	0	0	16	0	0	12	0	0	15	0	0
chr1	86350049	-	T	chr1:86350049	Gm24148,Mir3535,Ncl,Snora75	SINE	UTR	regulatory_region_variant	0	0	86351744	1695	upstream	intronic	1.69827	0.00567	0.00175	0.179	|	0.916542	0.0336	0.0178	0.25	|	0	80	0	2	60	0.0333333	2	70	0.0285714	1	37	0.027027	0	97	0	0	62	0	0	129	0	2	54	0.037037	0
chr1	86350051	-	T	chr1:86350051	Gm24148,Mir3535,Ncl,Snora75	SINE	UTR	regulatory_region_variant	0	0	-	-	-	-	0.989635	0.00446	0.00225	0.268	|	1.05261	0.11	0.0532	0.00154	|	1	81	0.0123457	1	62	0.016129	0	71	0	0	36	0	1	96	0.0104167	1	62	0.016129	0	128	0	0	54	0	0
chr1	86350053	-	T	chr1:86350053	Gm24148,Mir3535,Ncl,Snora75	SINE	UTR	regulatory_region_variant	0	0	86351734	1681	upstream	intronic	0.820232	0.00177	<0.001	0.363	|	1.45914	0.0201	0.00732	0.0292	|	0	82	0	0	61	0	0	72	0	0	33	0	0	95	0	0	60	0	0	127	0	0	54	0	0
chr1	86350105	-	T	chr1:86350105	Gm24148,Mir3535,Ncl,Snora75	SINE	UTR	regulatory_region_variant	1	1	86351677	1572	upstream	intronic	3.1778	0.035	0.00386	0.0376	|	0.694587	0.131	0.0806	0.134	|	1	83	0.0120482	7	72	0.0972222	2	67	0.0298507	2	38	0.0526316	1	108	0.00925926	2	41	0.0487805	0	100	0	10	70	0.142857	0
chr1	86350115	-	T	chr1:86350115	Gm24148,Mir3535,Ncl,Snora75	SINE	UTR	regulatory_region_variant	0	0	-	-	-	-	0.356141	0.00338	0.00264	0.798	|	0.897551	0.0989	0.0531	0.0165	|	1	82	0.0121951	3	70	0.0428571	0	66	0	0	32	0	3	107	0.0280374	0	32	0	0	81	0	2	57	0.0350877	0
chr1	86351721	-	T	chr1:86351721	Gm24148,Mir3535,Ncl,Snora75,Snord82	SINE	Intron	non_coding_transcript_exon_variant	0	0	-	-	-	-	-0.200925	0.00213	0.00245	0.907	|	5.50184	0.305	0.00674	0.0281	|	0	1	0	0	107	0	0	7	0	0	88	0	0	4	0	1	105	0.00952381	0	5	0	2	205	0.0097561	0
chr1	86351723	-	T	chr1:86351723	Gm24148,Mir3535,Ncl,Snora75,Snord82	SINE	Intron	non_coding_transcript_exon_variant	0	0	-	-	-	-	0.556427	0.0036	0.00245	0.773	|	4.31257	0.477	0.024	0.0769	|	0	1	0	0	110	0	0	6	0	2	87	0.0229885	0	4	0	1	105	0.00952381	0	5	0	2	202	0.00990099	0
chr1	88264071	-	T	chr1:88264071	Hjurp,Mroh2a	SINE	UTR	3_prime_UTR_variant	0	0	-	-	-	-	-0.111594	0.00144	0.00156	0.889	|	0.814717	0.0227	0.0129	0.508	|	0	184	0	2	221	0.00904977	0	179	0	0	156	0	1	249	0.00401606	0	150	0	1	279	0.00358423	0	139	0	0
chr1	88272091	-	T	chr1:88272091	Hjurp	SINE	Intron	non_coding_transcript_variant	0	0	-	-	-	-	-1.4943	<0.001	0.00282	0.363	|	1.92764	0.0177	0.00465	0.248	|	0	60	0	0	66	0	0	42	0	0	52	0	0	50	0	0	34	0	0	6	0	0	19	0	1
chr1	88272158	-	T	chr1:88272158	Hjurp	SINE	Intron	non_coding_transcript_variant	1	1	-	-	-	-	0.118853	0.00343	0.00316	0.961	|	1.55442	0.183	0.0624	0.0259	|	0	61	0	4	61	0.0655738	0	50	0	1	40	0.025	0	48	0	0	44	0	0	9	0	0	12	0	2
chr1	88273225	-	T	chr1:88273225	Hjurp,Trpm8	SINE	Intron	intron_variant	0	0	88272114	1111	downstream	intronic	1.23014	0.00235	<0.001	0.363	|	0.211779	0.00889	0.00768	0.771	|	0	20	0	0	18	0	0	13	0	2	12	0.166667	0	33	0	0	19	0	0	8	0	0	0	---	0
chr1	91280121	+	A	chr1:91280121	Ube2f	SINE	Intron	non_coding_transcript_variant	0	0	-	-	-	-	0	<0.001	<0.001	---	|	2.15797	0.295	0.0662	0.282	|	0	7	0	0	10	0	0	5	0	0	19	0	0	7	0	0	17	0	0	0	---	0	0	---	0
chr1	91280126	+	A	chr1:91280126	Ube2f	SINE	Intron	non_coding_transcript_variant	0	0	-	-	-	-	1.25106	0.00238	<0.001	0.363	|	3.0873	0.0085	<0.001	0.179	|	0	7	0	2	11	0.181818	0	6	0	0	16	0	0	7	0	0	18	0	0	0	---	0	0	---	0
chr1	91394592	-	T	chr1:91394592	Ilkap	SINE	Intron	non_coding_transcript_variant	0	0	91392800	1792	downstream	intronic	1.82169	0.00353	<0.001	0.175	|	3.98863	0.0384	0.00242	0.0552	|	0	15	0	2	50	0.04	0	2	0	0	31	0	0	5	0	2	41	0.0487805	0	0	---	0	22	0	0
chr1	91394606	-	T	chr1:91394606	Ilkap	SINE	Intron	regulatory_region_variant	0	0	-	-	-	-	0.71556	0.00164	<0.001	0.363	|	-0.374894	0.0193	0.025	0.89	|	0	17	0	1	51	0.0196078	0	2	0	0	30	0	0	4	0	0	38	0	0	0	---	0	19	0	0
chr1	91394609	-	T	chr1:91394609	Ilkap	SINE	Intron	regulatory_region_variant	0	0	-	-	-	-	0.710891	0.00164	<0.001	0.363	|	1.36276	0.00623	0.00242	0.605	|	0	17	0	1	52	0.0192308	0	2	0	0	30	0	0	4	0	0	42	0	0	0	---	0	19	0	0
chr1	91394629	-	T	chr1:91394629	Ilkap	SINE	Intron	regulatory_region_variant	1	1	-	-	-	-	1.88189	0.00369	<0.001	0.177	|	-1.14843	0.0979	0.217	0.608	|	0	15	0	2	57	0.0350877	0	1	0	0	34	0	0	4	0	3	42	0.0714286	0	0	---	0	17	0	0
chr1	92461214	-	T	chr1:92461214	Mir6900,Ndufa10	.	Intron	non_coding_transcript_variant	0	0	-	-	-	-	0	<0.001	<0.001	---	|	0.343825	0.102	0.0803	0.641	|	0	3	0	0	0	---	0	10	0	0	1	0	0	11	0	0	1	0	0	12	0	0	18	0	0
chr1	93366795	+	A	chr1:93366795	Gm26446,Ppp1r7	SINE	UTR	3_prime_UTR_variant	0	0	93364327	2468	upstream	intronic	-1.07616	<0.001	0.00211	0.374	|	0.937462	0.0378	0.0198	0.183	|	0	15	0	0	3	0	0	25	0	0	2	0	0	27	0	0	1	0	0	60	0	0	7	0	0
chr1	93371604	+	A	chr1:93371604	Ano7,Ppp1r7	SINE	UTR	3_prime_UTR_variant	0	0	93372140	536	downstream	UTR	4.98289	0.0316	<0.001	0.5	|	-0.285138	0.0218	0.0265	0.92	|	---	---	---	0	0	---	0	1	0	---	---	---	0	2	0	0	0	---	0	4	0	3	3	1	---
chr1	93371640	+	A	chr1:93371640	Ano7,Ppp1r7	SINE	UTR	3_prime_UTR_variant	1	1	93372103	463	downstream	UTR	0	<0.001	<0.001	---	|	-0.846951	0.0064	0.0115	0.742	|	0	1	0	0	0	---	---	---	---	---	---	---	0	5	0	0	0	---	0	6	0	0	3	0	0
chr1	93371645	+	A	chr1:93371645	Ano7,Ppp1r7	SINE	UTR	3_prime_UTR_variant	1	1	93372098	453	downstream	UTR	3.32193	0.01	<0.001	0.423	|	0.0554161	0.834	0.802	0.629	|	0	2	0	0	0	---	---	---	---	---	---	---	0	5	0	0	0	---	0	7	0	5	5	1	0
chr1	93371652	+	A	chr1:93371652	Ano7,Ppp1r7	SINE	UTR	3_prime_UTR_variant	1	1	93372091	439	downstream	UTR	0	<0.001	<0.001	---	|	-2.64922	0.00582	0.0365	0.36	|	0	2	0	0	0	---	---	---	---	---	---	---	0	5	0	0	0	---	0	7	0	0	5	0	0
chr1	93371657	+	A	chr1:93371657	Ano7,Ppp1r7	SINE	UTR	3_prime_UTR_variant	1	1	93372086	429	downstream	UTR	0	<0.001	<0.001	---	|	-1.58266	0.00179	0.00537	0.244	|	0	2	0	0	0	---	---	---	---	---	---	---	0	5	0	0	0	---	0	7	0	0	5	0	0
chr1	93371671	+	A	chr1:93371671	Ano7,Ppp1r7	SINE	UTR	3_prime_UTR_variant	1	1	93372073	402	downstream	UTR	0	<0.001	<0.001	---	|	2.80126	0.0702	0.0101	0.11	|	0	2	0	0	0	---	---	---	---	---	---	---	0	5	0	0	0	---	0	6	0	0	8	0	0
chr1	93372097	+	A	chr1:93372097	Ano7,Ppp1r7	SINE	UTR	3_prime_UTR_variant	0	0	93371647	450	upstream	UTR	0	<0.001	<0.001	---	|	1.6948	0.241	0.0745	0.415	|	0	3	0	0	0	---	0	5	0	---	---	---	0	5	0	0	0	---	0	4	0	0	0	---	0
chr1	93372101	+	A	chr1:93372101	Ano7,Ppp1r7	SINE	UTR	3_prime_UTR_variant	0	0	93371643	458	upstream	UTR	0	<0.001	<0.001	---	|	-3.72127	0.00877	0.116	0.117	|	0	3	0	0	0	---	0	5	0	---	---	---	0	5	0	0	0	---	0	4	0	0	0	---	0
chr1	93372130	+	A	chr1:93372130	Ano7,Ppp1r7	SINE	UTR	3_prime_UTR_variant	0	0	-	-	-	-	0	<0.001	<0.001	---	|	0.469303	0.062	0.0448	0.858	|	0	4	0	0	0	---	4	6	0.666667	---	---	---	0	3	0	0	0	---	0	4	0	0	0	---	0
chr1	93372133	+	A	chr1:93372133	Ano7,Ppp1r7	SINE	UTR	3_prime_UTR_variant	0	0	93371615	518	upstream	UTR	0	<0.001	<0.001	---	|	-1.59589	0.0163	0.0492	0.561	|	0	4	0	0	0	---	2	6	0.333333	---	---	---	0	3	0	0	0	---	0	4	0	0	0	---	0
chr1	93372168	+	A	chr1:93372168	Ano7,Ppp1r7	SINE	UTR	3_prime_UTR_variant	0	0	93371575	593	upstream	UTR	0	<0.001	<0.001	---	|	0.217892	0.023	0.0198	0.896	|	0	3	0	0	0	---	2	6	0.333333	---	---	---	0	4	0	0	0	---	0	0	---	0	0	---	---
chr1	93412225	-	T	chr1:93412225	Hdlbp	SINE	Intron	intron_variant	1	1	-	-	-	-	0.94673	0.00193	<0.001	0.363	|	4.0803	0.15	0.00889	0.141	|	0	5	0	2	39	0.0512821	0	10	0	0	22	0	0	7	0	0	33	0	0	6	0	0	0	---	0
chr1	93440783	-	T	chr1:93440783	Hdlbp	.	UTR	5_prime_UTR_variant	0	0	-	-	-	-	-0.795126	0.0069	0.012	0.545	|	0.00856628	0.00216	0.00215	0.994	|	1	267	0.00374532	2	138	0.0144928	7	213	0.0328638	5	96	0.0520833	3	245	0.0122449	0	96	0	3	64	0.046875	9	63	0.142857	1
chr1	93508882	+	A	chr1:93508882	Farp2,Sept2	.	UTR	3_prime_UTR_variant	0	0	-	-	-	-	-1.71903	0.00225	0.0074	0.137	|	0.253774	0.0143	0.012	0.706	|	7	476	0.0147059	3	259	0.011583	10	416	0.0240385	0	162	0	3	548	0.00547445	3	270	0.0111111	11	494	0.0222672	0	231	0	1
chr1	93509088	+	A	chr1:93509088	Farp2,Sept2	.	UTR	3_prime_UTR_variant	0	0	-	-	-	-	-2.42723	0.00944	0.0508	0.000157	|	-0.451942	0.026	0.0355	0.42	|	16	436	0.0366972	2	194	0.0103093	17	348	0.0488506	1	153	0.00653595	38	509	0.0746562	3	241	0.0124481	27	545	0.0495413	2	347	0.00576369	19
chr1	93695368	+	A	chr1:93695368	Bok	.	UTR	regulatory_region_variant	0	0	-	-	-	-	1.97385	0.00393	<0.001	0.391	|	-0.159263	0.022	0.0246	0.819	|	0	0	---	---	---	---	2	2	1	---	---	---	0	1	0	0	0	---	0	14	0	0	16	0	0
chr1	93796125	+	A	chr1:93796125	Dtymk	SINE	Intron	intron_variant	0	0	93795310	815	upstream	intronic	1.66096	0.00316	<0.001	0.363	|	-0.0526069	0.00278	0.00289	0.983	|	0	6	0	1	1	1	0	4	0	0	2	0	0	12	0	0	1	0	0	4	0	0	0	---	0
chr1	93799581	-	T	chr1:93799581	Dtymk,Ing5	SINE	Intron	intron_variant	0	0	-	-	-	-	0	<0.001	<0.001	---	|	1.06067	0.118	0.0567	0.0759	|	0	26	0	0	10	0	0	33	0	0	1	0	0	54	0	0	0	---	0	42	0	0	3	0	0
chr1	93800144	-	T	chr1:93800144	Dtymk,Ing5	SINE	UTR	3_prime_UTR_variant	0	0	-	-	-	-	0	<0.001	<0.001	---	|	3.02598	0.0827	0.0101	0.173	|	0	25	0	0	8	0	0	22	0	0	3	0	0	41	0	0	8	0	0	25	0	0	18	0	0
chr1	93917840	+	A	chr1:93917840	Gal3st2b,Gm18666	SINE	intergenic	downstream_gene_variant	0	0	-	-	-	-	-1.08844	<0.001	0.00213	0.374	|	0.256914	0.0111	0.00927	0.885	|	0	85	0	0	10	0	0	70	0	0	6	0	3	69	0.0434783	0	13	0	0	123	0	0	2	0	0
chr1	93917963	+	A	chr1:93917963	Gal3st2b,Gm18666	SINE	intergenic	downstream_gene_variant	0	0	-	-	-	-	0	<0.001	<0.001	---	|	3.23982	0.0554	0.00587	0.304	|	0	18	0	0	4	0	0	15	0	0	2	0	0	18	0	0	3	0	0	33	0	0	2	0	0
chr1	93917965	+	A	chr1:93917965	Gal3st2b,Gm18666	SINE	intergenic	downstream_gene_variant	0	0	-	-	-	-	0	<0.001	<0.001	---	|	1.76805	0.0161	0.00474	0.485	|	0	18	0	0	4	0	0	14	0	0	2	0	0	18	0	0	3	0	0	33	0	0	2	0	0
chr1	118298368	-	T	chr1:118298368	Tsn	SINE	UTR	3_prime_UTR_variant	0	0	-	-	-	-	0	<0.001	<0.001	---	|	1.02156	0.00203	<0.001	0.374	|	0	1	0	---	---	---	0	5	0	0	0	---	0	9	0	0	2	0	0	14	0	0	5	0	0
chr1	118333741	+	A	chr1:118333741	Nifk	SINE	UTR	3_prime_UTR_variant	0	0	-	-	-	-	0.789494	0.00173	<0.001	0.363	|	3.66725	0.0568	0.00447	0.0287	|	0	23	0	0	56	0	0	22	0	0	40	0	0	38	0	0	57	0	0	109	0	4	150	0.0266667	0
chr1	127943591	+	A	chr1:127943591	Rab3gap1	Simple	UTR	3_prime_UTR_variant	0	0	127943595	4	downstream	UTR	-0.182592	0.814	0.924	0.121	|	0.0222587	0.965	0.951	0.215	|	35	39	0.897436	22	28	0.785714	3	3	1	2	3	0.666667	26	29	0.896552	6	6	1	213	240	0.8875	59	74	0.797297	117
chr1	128273311	+	A	chr1:128273311	Ubxn4	SINE	Intron	intron_variant	1	1	-	-	-	-	1.64004	0.00312	<0.001	0.363	|	4.03173	0.359	0.0219	0.085	|	0	29	0	0	54	0	0	15	0	0	35	0	0	34	0	0	47	0	0	15	0	11	12	0.916667	0
chr1	128273694	+	A	chr1:128273694	Ubxn4	SINE	Intron	intron_variant	0	0	128274207	513	downstream	intronic	3.31802	0.00997	<0.001	0.107	|	2.82714	0.0514	0.00725	0.2	|	0	41	0	5	66	0.0757576	0	24	0	0	35	0	0	26	0	1	77	0.012987	0	1	0	0	5	0	0
chr1	128274557	+	A	chr1:128274557	Ubxn4	SINE	Intron	intron_variant	0	0	128272931	1626	upstream	exonic	0	<0.001	<0.001	---	|	-1.39316	<0.001	0.00263	0.374	|	0	29	0	0	73	0	0	31	0	0	52	0	0	39	0	0	86	0	0	10	0	0	23	0	0
chr1	131931516	+	A	chr1:131931516	Gm37676,Nucks1	SINE	UTR	3_prime_UTR_variant	0	0	-	-	-	-	-2.49448	0.00197	0.0111	0.0757	|	1.07701	0.0618	0.0293	0.0177	|	1	96	0.0104167	0	64	0	1	96	0.0104167	0	65	0	0	106	0	0	97	0	0	105	0	0	65	0	5
chr1	132025641	+	A	chr1:132025641	Elk4,Mfsd4a	SINE	UTR	3_prime_UTR_variant	0	0	-	-	-	-	2.48201	0.0105	0.00189	0.306	|	0.776389	0.0455	0.0266	0.709	|	0	160	0	1	37	0.027027	5	111	0.045045	0	21	0	0	164	0	3	37	0.0810811	0	46	0	0	29	0	0
chr1	132025701	-	T	chr1:132025701	Elk4,Mfsd4a	SINE	UTR	3_prime_UTR_variant	1	1	-	-	-	-	0	<0.001	<0.001	---	|	-0.148869	0.00359	0.00399	0.919	|	0	215	0	0	61	0	0	157	0	0	41	0	0	224	0	0	46	0	0	56	0	0	29	0	0
chr1	132025706	-	T	chr1:132025706	Elk4,Mfsd4a	SINE	UTR	3_prime_UTR_variant	1	1	-	-	-	-	0	<0.001	<0.001	---	|	1.05867	0.00208	<0.001	0.374	|	0	220	0	0	63	0	0	151	0	0	40	0	0	225	0	0	48	0	0	56	0	0	36	0	0
chr1	132025719	+	A	chr1:132025719	Elk4,Mfsd4a	SINE	UTR	3_prime_UTR_variant	0	0	-	-	-	-	1.3968	0.00263	<0.001	0.363	|	4.95493	0.0556	0.00179	0.00504	|	0	219	0	0	65	0	0	148	0	0	43	0	0	222	0	0	42	0	0	51	0	0	38	0	0
chr1	132025734	-	T	chr1:132025734	Elk4,Mfsd4a	SINE	UTR	3_prime_UTR_variant	1	1	132026683	949	upstream	UTR	0	<0.001	<0.001	---	|	-0.99601	0.00206	0.00411	0.632	|	0	235	0	0	67	0	0	170	0	0	45	0	0	223	0	0	51	0	0	43	0	0	46	0	0
chr1	132114052	-	T	chr1:132114052	Cdk18	.	UTR	3_prime_UTR_variant	0	0	-	-	-	-	-1.41178	<0.001	0.00266	0.374	|	-1.58544	0.0129	0.0387	0.381	|	0	5	0	---	---	---	0	3	0	0	0	---	0	10	0	0	0	---	0	35	0	0	2	0	2
chr1	132984052	-	T	chr1:132984052	Mdm4	SINE	Intron	intron_variant	0	0	-	-	-	-	0	<0.001	<0.001	---	|	0.690867	0.00743	0.0046	0.777	|	0	17	0	0	6	0	0	15	0	0	10	0	0	26	0	0	10	0	0	30	0	0	5	0	0
chr1	132984109	-	T	chr1:132984109	Mdm4	SINE	Intron	intron_variant	0	0	-	-	-	-	1.23014	0.00235	<0.001	0.363	|	-1.47566	0.0175	0.0487	0.516	|	0	17	0	0	8	0	0	19	0	1	6	0.166667	0	22	0	0	3	0	0	26	0	0	6	0	0
chr1	132985827	-	T	chr1:132985827	Mdm4	SINE	Intron	intron_variant	0	0	-	-	-	-	-1.11469	<0.001	0.00217	0.374	|	3.56776	0.025	0.00211	0.258	|	0	11	0	0	2	0	0	4	0	0	5	0	1	21	0.047619	0	13	0	0	10	0	0	0	---	0
chr1	132985837	-	T	chr1:132985837	Mdm4	SINE	Intron	intron_variant	1	1	-	-	-	-	0	<0.001	<0.001	---	|	0.796215	0.374	0.216	0.31	|	0	9	0	0	4	0	0	3	0	0	5	0	0	16	0	0	12	0	0	10	0	0	0	---	0
chr1	133137534	+	A	chr1:133137534	Ppp1r15b	SINE	UTR	3_prime_UTR_variant	0	0	-	-	-	-	2.81277	0.0372	0.0053	0.0644	|	-0.408934	0.00787	0.0105	0.759	|	23	702	0.0327635	31	908	0.034141	23	637	0.0361068	19	697	0.0272597	13	693	0.018759	42	1001	0.041958	0	133	0	5	113	0.0442478	0
chr1	133137536	+	A	chr1:133137536	Ppp1r15b	SINE	UTR	3_prime_UTR_variant	0	0	-	-	-	-	1.61051	0.0157	0.00515	0.147	|	0.208725	0.00463	0.00401	0.885	|	13	703	0.0184922	21	913	0.0230011	16	638	0.0250784	26	700	0.0371429	28	693	0.040404	33	1003	0.0329013	0	132	0	2	113	0.0176991	0
chr1	133137544	+	A	chr1:133137544	Ppp1r15b	SINE	UTR	3_prime_UTR_variant	1	1	-	-	-	-	-0.0166478	0.173	0.175	0.92	|	-0.0546234	0.0969	0.101	0.942	|	106	693	0.152958	163	843	0.193357	104	631	0.164818	126	662	0.190332	107	690	0.155072	189	983	0.192269	17	119	0.142857	11	116	0.0948276	18
chr1	133137561	+	A	chr1:133137561	Ppp1r15b	SINE	UTR	3_prime_UTR_variant	1	1	-	-	-	-	-0.556815	0.0621	0.0913	0.42	|	0.883258	0.0449	0.0244	0.00816	|	54	623	0.0866774	55	767	0.071708	42	534	0.0786517	53	607	0.0873147	44	600	0.0733333	65	883	0.0736127	13	114	0.114035	1	114	0.00877193	9
chr1	133137570	+	A	chr1:133137570	Ppp1r15b	SINE	UTR	3_prime_UTR_variant	0	0	133137989	419	downstream	UTR	-1.72558	0.0178	0.059	0.272	|	1.46025	0.0108	0.00393	0.301	|	13	639	0.0203443	27	810	0.0333333	36	534	0.0674157	31	650	0.0476923	30	609	0.0492611	40	906	0.0441501	3	131	0.0229008	6	112	0.0535714	9
chr1	133137983	+	A	chr1:133137983	Ppp1r15b	DNA	UTR	3_prime_UTR_variant	0	0	133137579	404	upstream	UTR	0.314701	0.0047	0.00378	0.736	|	1.64703	0.00566	0.00181	0.194	|	2	199	0.0100503	3	290	0.0103448	4	177	0.0225989	4	273	0.014652	3	235	0.012766	1	307	0.00325733	0	44	0	0	50	0	0
chr1	133138010	+	A	chr1:133138010	Ppp1r15b	DNA	UTR	3_prime_UTR_variant	1	1	-	-	-	-	0.2944	0.416	0.339	0.364	|	0.713195	0.299	0.183	0.344	|	91	234	0.388889	132	322	0.409938	78	233	0.334764	121	299	0.404682	115	287	0.400697	150	338	0.443787	13	85	0.152941	41	123	0.333333	10
chr1	133138018	+	A	chr1:133138018	Ppp1r15b	DNA	UTR	3_prime_UTR_variant	0	0	-	-	-	-	0.441838	0.0898	0.0661	0.341	|	-0.483947	0.0347	0.0485	0.311	|	24	243	0.0987654	30	333	0.0900901	24	253	0.0948617	25	308	0.0811688	38	307	0.123779	51	359	0.142061	2	84	0.0238095	13	131	0.0992366	2
chr1	134186139	+	A	chr1:134186139	Chil1	SINE	Intron	non_coding_transcript_variant	0	0	-	-	-	-	2.16338	0.71	0.158	0.00899	|	0	<0.001	<0.001	---	|	2	12	0.166667	61	85	0.717647	1	13	0.0769231	36	49	0.734694	1	19	0.0526316	38	59	0.644068	8	22	0.363636	25	29	0.862069	4
chr1	134426873	+	A	chr1:134426873	Adipor1	SINE	Intron	regulatory_region_variant	0	0	134429264	2391	downstream	intronic	3.82202	0.0141	<0.001	0.0263	|	0	<0.001	<0.001	---	|	0	8	0	7	160	0.04375	0	6	0	3	82	0.0365854	0	7	0	3	60	0.05	0	11	0	0	17	0	0
chr1	134426874	+	A	chr1:134426874	Adipor1	SINE	Intron	regulatory_region_variant	0	0	134429263	2389	downstream	intronic	3.76407	0.0136	<0.001	0.0265	|	0	<0.001	<0.001	---	|	0	8	0	11	158	0.0696203	0	6	0	2	79	0.0253165	0	7	0	4	59	0.0677966	0	12	0	0	17	0	0
chr1	134759815	-	T	chr1:134759815	Ppp1r12b,Syt2	.	UTR	regulatory_region_variant	0	0	-	-	-	-	0	<0.001	<0.001	---	|	-2.0294	0.00336	0.0137	0.318	|	0	11	0	---	---	---	0	8	0	---	---	---	0	18	0	0	2	0	2	9	0.222222	---	---	---	0
chr1	135388840	-	T	chr1:135388840	Ipo9	SINE	Intron	non_coding_transcript_variant	0	0	135391252	2412	upstream	intronic	0	<0.001	<0.001	---	|	0.306078	0.296	0.239	0.709	|	0	5	0	0	3	0	0	13	0	0	2	0	0	14	0	0	4	0	0	6	0	0	2	0	0
chr1	135388846	-	T	chr1:135388846	Ipo9	SINE	Intron	non_coding_transcript_variant	0	0	135391246	2400	upstream	intronic	0	<0.001	<0.001	---	|	0.136474	0.33	0.3	0.801	|	0	5	0	0	3	0	0	13	0	0	2	0	0	15	0	0	4	0	0	6	0	0	0	---	0
chr1	138486875	-	T	chr1:138486875	Nek7	.	UTR	3_prime_UTR_variant	0	0	-	-	-	-	-1.97375	0.0197	0.0774	0.103	|	0.0923785	0.00733	0.00688	0.969	|	29	385	0.0753247	3	312	0.00961538	24	334	0.0718563	6	252	0.0238095	20	400	0.05	11	297	0.037037	26	224	0.116071	6	86	0.0697674	5
chr1	143747312	+	A	chr1:143747312	Glrx2,Trove2	SINE	UTR	3_prime_UTR_variant	0	0	-	-	-	-	0	<0.001	<0.001	---	|	0.348453	0.0278	0.0219	0.628	|	0	19	0	0	3	0	0	8	0	---	---	---	0	16	0	0	4	0	0	11	0	0	2	0	0
chr1	143749562	+	A	chr1:143749562	Glrx2,Trove2	SINE	UTR	3_prime_UTR_variant	0	0	-	-	-	-	0	<0.001	<0.001	---	|	-0.412983	0.0465	0.0618	0.879	|	0	2	0	0	1	0	0	1	0	---	---	---	0	7	0	---	---	---	0	17	0	0	7	0	3
chr1	143755364	-	T	chr1:143755364	Trove2	SINE	UTR	3_prime_UTR_variant	1	1	143755654	290	upstream	UTR	1.71083	0.0467	0.0143	0.237	|	-0.245887	0.0202	0.0239	0.904	|	4	18	0.222222	2	4	0.5	2	14	0.142857	1	3	0.333333	4	15	0.266667	1	4	0.25	0	16	0	0	4	0	0
chr1	143755371	-	T	chr1:143755371	Trove2	SINE	UTR	3_prime_UTR_variant	1	1	143755646	275	upstream	UTR	-0.802552	0.00794	0.0138	0.562	|	-0.954544	0.0155	0.0299	0.652	|	2	18	0.111111	0	4	0	2	13	0.153846	3	3	1	7	17	0.411765	1	4	0.25	0	12	0	0	6	0	0
chr1	143755378	-	T	chr1:143755378	Trove2	SINE	UTR	3_prime_UTR_variant	1	1	143755754	376	upstream	UTR	0.137405	0.935	0.85	0.149	|	0.0279888	0.972	0.953	0.0648	|	12	17	0.705882	4	4	1	13	15	0.866667	3	3	1	13	13	1	7	7	1	8	13	0.615385	4	6	0.666667	2
chr1	143755383	-	T	chr1:143755383	Trove2	SINE	UTR	3_prime_UTR_variant	1	1	143755636	253	upstream	UTR	0.834819	0.227	0.127	0.272	|	0.445245	0.168	0.123	0.404	|	5	16	0.3125	4	4	1	9	16	0.5625	4	4	1	5	16	0.3125	5	7	0.714286	1	13	0.0769231	4	6	0.666667	0
chr1	143755756	-	T	chr1:143755756	Trove2	SINE	UTR	3_prime_UTR_variant	0	0	143755376	380	downstream	UTR	1.10731	0.00874	0.00405	0.828	|	-0.514637	0.0103	0.0148	0.578	|	1	15	0.0666667	0	5	0	1	4	0.25	---	---	---	0	26	0	4	6	0.666667	0	1	0	---	---	---	0
chr1	143755761	-	T	chr1:143755761	Trove2	SINE	UTR	3_prime_UTR_variant	0	0	-	-	-	-	1.07627	0.0368	0.0175	0.801	|	-0.603673	0.0113	0.0171	0.753	|	1	15	0.0666667	0	5	0	1	4	0.25	---	---	---	2	25	0.08	3	6	0.5	0	1	0	---	---	---	0
chr1	143755767	+	A	chr1:143755767	Trove2	SINE	UTR	3_prime_UTR_variant	0	0	143755366	401	upstream	UTR	0	<0.001	<0.001	---	|	0.759172	0.00169	<0.001	0.374	|	0	18	0	0	5	0	0	5	0	---	---	---	0	25	0	0	6	0	0	1	0	---	---	---	0
chr1	143755824	-	T	chr1:143755824	Trove2	SINE	UTR	3_prime_UTR_variant	0	0	143756338	514	upstream	UTR	1.56634	0.00296	<0.001	0.391	|	1.70655	0.0258	0.0079	0.433	|	0	17	0	0	6	0	0	4	0	0	2	0	0	18	0	1	13	0.0769231	0	2	0	---	---	---	0
chr1	153116762	+	A	chr1:153116762	Nmnat2	.	UTR	3_prime_UTR_variant	0	0	-	-	-	-	0	<0.001	<0.001	---	|	1.34034	0.00863	0.00341	0.215	|	0	1	0	---	---	---	0	0	---	---	---	---	---	---	---	---	---	---	---	---	---	0	12	0	0
chr1	153116765	+	A	chr1:153116765	Nmnat2	.	UTR	3_prime_UTR_variant	0	0	-	-	-	-	2.82193	0.00707	<0.001	0.5	|	0.698055	0.0424	0.0261	0.0218	|	0	1	0	---	---	---	0	0	---	---	---	---	---	---	---	---	---	---	---	---	---	0	14	0	0
chr1	153116766	+	A	chr1:153116766	Nmnat2	.	UTR	3_prime_UTR_variant	0	0	-	-	-	-	3.73164	0.0133	<0.001	0.5	|	1.03574	0.0182	0.00889	0.354	|	0	1	0	---	---	---	0	0	---	---	---	---	---	---	---	---	---	---	---	---	---	0	13	0	0
chr1	153220698	-	T	chr1:153220698	Lamc1	.	UTR	3_prime_UTR_variant	0	0	-	-	-	-	-2.37526	<0.001	0.00519	0.178	|	-0.410697	0.0354	0.0471	0.658	|	0	17	0	0	1	0	0	12	0	0	10	0	2	28	0.0714286	0	7	0	1	19	0.0526316	0	10	0	---
chr1	153762746	+	A	chr1:153762746	Rnasel	Simple	UTR	3_prime_UTR_variant	0	0	153762555	191	upstream	UTR	-3.19016	0.0038	0.0347	0.0562	|	0	<0.001	<0.001	---	|	4	144	0.0277778	0	44	0	4	103	0.038835	0	20	0	5	149	0.033557	2	30	0.0666667	5	82	0.0609756	0	61	0	1
chr1	155206782	+	A	chr1:155206782	Stx6	.	intergenic	intron_variant	0	0	-	-	-	-	0	<0.001	<0.001	---	|	-2.28064	0.022	0.107	0.35	|	0	1	0	---	---	---	0	2	0	---	---	---	0	4	0	---	---	---	0	0	---	---	---	---	0
chr1	156005064	-	T	chr1:156005064	Tor1aip1	.	UTR	3_prime_UTR_variant	0	0	-	-	-	-	-2.01883	0.0016	0.00649	0.0592	|	0.620892	0.0121	0.00789	0.353	|	3	620	0.00483871	0	329	0	3	474	0.00632911	0	205	0	5	732	0.0068306	0	366	0	5	443	0.0112867	6	356	0.0168539	0
chr1	156427536	-	T	chr1:156427536	Soat1	SINE	UTR	3_prime_UTR_variant	0	0	156429240	1704	upstream	UTR	-3.17427	<0.001	0.00903	0.0796	|	-0.65609	0.0257	0.0404	0.719	|	0	52	0	0	5	0	0	65	0	0	3	0	2	48	0.0416667	0	8	0	2	11	0.181818	0	4	0	0
chr1	156427547	-	T	chr1:156427547	Soat1	SINE	UTR	3_prime_UTR_variant	0	0	156429229	1682	upstream	UTR	-0.868483	<0.001	0.00183	0.363	|	1.29189	0.0237	0.00966	0.616	|	0	56	0	0	5	0	0	64	0	0	3	0	2	54	0.037037	0	9	0	0	10	0	0	4	0	0
chr1	156427550	-	T	chr1:156427550	Soat1	SINE	UTR	3_prime_UTR_variant	0	0	156429225	1675	upstream	UTR	-2.3182	<0.001	0.00499	0.177	|	0.4	0.0229	0.0174	0.869	|	0	56	0	0	5	0	0	65	0	0	3	0	0	54	0	0	9	0	2	10	0.2	0	4	0	0
chr1	156427964	-	T	chr1:156427964	Soat1	SINE	UTR	3_prime_UTR_variant	0	0	-	-	-	-	-6.39323	<0.001	0.0841	0.00449	|	-0.743226	0.0273	0.0457	0.688	|	8	143	0.0559441	0	6	0	5	81	0.0617284	0	4	0	4	123	0.0325203	0	2	0	4	26	0.153846	---	---	---	0
chr1	156428031	-	T	chr1:156428031	Soat1	SINE	UTR	3_prime_UTR_variant	1	1	-	-	-	-	-4.21684	0.00296	0.0551	0.128	|	0.400786	0.543	0.411	0.444	|	9	237	0.0379747	1	13	0.0769231	12	158	0.0759494	0	8	0	2	196	0.0102041	0	12	0	9	39	0.230769	---	---	---	4
chr1	156429209	-	T	chr1:156429209	Soat1	SINE	UTR	3_prime_UTR_variant	0	0	156427567	1642	downstream	UTR	-3.93921	<0.001	0.0153	2.43e-05	|	1.22046	0.0679	0.0292	0.453	|	11	299	0.0367893	0	10	0	3	192	0.015625	0	15	0	4	308	0.012987	0	12	0	2	184	0.0108696	0	47	0	2
chr1	156429227	-	T	chr1:156429227	Soat1	SINE	UTR	3_prime_UTR_variant	0	0	156427548	1679	downstream	UTR	0.960791	0.00431	0.00221	0.622	|	1.47487	0.0902	0.0325	0.0196	|	2	263	0.00760456	0	12	0	0	157	0	2	13	0.153846	4	258	0.0155039	0	12	0	0	185	0	2	48	0.0416667	0
chr1	156429238	-	T	chr1:156429238	Soat1	SINE	UTR	3_prime_UTR_variant	0	0	156427537	1701	downstream	UTR	-0.47275	<0.001	0.00139	0.363	|	1.01234	0.0931	0.0462	0.141	|	0	239	0	0	7	0	1	140	0.00714286	0	8	0	0	238	0	0	15	0	0	177	0	0	50	0	0
chr1	156680065	-	T	chr1:156680065	Fam20b,Gm19918	SINE	UTR	3_prime_UTR_variant	0	0	156682236	2171	upstream	intronic	-0.556071	<0.001	0.00147	0.363	|	1.84367	0.0206	0.00574	0.19	|	0	106	0	0	11	0	1	99	0.010101	0	20	0	0	116	0	0	15	0	0	84	0	0	7	0	0
chr1	157136748	-	T	chr1:157136748	Gm30694,Rasal2	SINE	UTR	3_prime_UTR_variant	0	0	-	-	-	-	-4.61441	<0.001	0.0245	0.5	|	1.36935	0.0815	0.0315	0.0705	|	0	3	0	---	---	---	0	2	0	---	---	---	0	7	0	---	---	---	0	9	0	0	2	0	---
chr1	157136779	-	T	chr1:157136779	Gm30694,Rasal2	SINE	UTR	3_prime_UTR_variant	0	0	-	-	-	-	0	<0.001	<0.001	---	|	-0.697284	0.00398	0.00645	0.71	|	---	---	---	---	---	---	0	2	0	---	---	---	0	4	0	---	---	---	0	5	0	0	2	0	---
chr1	157138062	-	T	chr1:157138062	Gm30694,Rasal2	SINE	UTR	3_prime_UTR_variant	0	0	-	-	-	-	0	<0.001	<0.001	---	|	3.11139	0.0202	0.00233	0.0365	|	0	7	0	---	---	---	0	4	0	---	---	---	0	2	0	0	2	0	0	4	0	---	---	---	0
chr1	159345240	+	A	chr1:159345240	Mir1843b,Rfwd2,Scarna3a	SINE	UTR	3_prime_UTR_variant	0	0	-	-	-	-	0	<0.001	<0.001	---	|	1.75403	0.0117	0.00346	0.0952	|	0	226	0	0	65	0	0	177	0	0	41	0	0	218	0	0	77	0	0	240	0	0	57	0	0
chr1	161010512	-	T	chr1:161010512	Serpinc1,Zbtb37	.	UTR	3_prime_UTR_variant	0	0	-	-	-	-	0	<0.001	<0.001	---	|	-1.05462	0.00591	0.0123	0.531	|	0	42	0	0	3	0	0	13	0	0	4	0	0	39	0	---	---	---	0	4	0	0	4	0	0
chr1	161011756	-	T	chr1:161011756	Zbtb37	SINE	UTR	3_prime_UTR_variant	0	0	-	-	-	-	0	<0.001	<0.001	---	|	2.06209	0.00981	0.00235	0.184	|	0	27	0	0	5	0	0	13	0	0	0	---	0	24	0	---	---	---	0	13	0	0	19	0	0
chr1	161011757	-	T	chr1:161011757	Zbtb37	SINE	UTR	3_prime_UTR_variant	0	0	-	-	-	-	0	<0.001	<0.001	---	|	-1.85772	<0.001	0.00362	0.178	|	0	27	0	0	5	0	0	12	0	0	0	---	0	23	0	---	---	---	0	16	0	0	19	0	0
chr1	161012364	-	T	chr1:161012364	Zbtb37	SINE	UTR	3_prime_UTR_variant	0	0	-	-	-	-	-1.03169	<0.001	0.00204	0.374	|	0.898049	0.29	0.156	0.115	|	0	14	0	0	3	0	1	28	0.0357143	0	0	---	0	21	0	0	1	0	0	1	0	---	---	---	0
chr1	161013004	-	T	chr1:161013004	Zbtb37	SINE	UTR	3_prime_UTR_variant	0	0	-	-	-	-	0	<0.001	<0.001	---	|	-0.379409	0.0652	0.0848	0.781	|	0	28	0	0	2	0	0	14	0	0	0	---	1	30	0.0333333	---	---	---	0	6	0	0	7	0	0
chr1	161015179	-	T	chr1:161015179	Zbtb37	SINE	UTR	3_prime_UTR_variant	0	0	-	-	-	-	0	<0.001	<0.001	---	|	2.33701	0.062	0.0123	0.198	|	0	18	0	0	6	0	0	12	0	0	0	---	0	24	0	0	2	0	0	0	---	---	---	---	0
chr1	161085502	+	A	chr1:161085502	Cenpl,Klhl20	SINE	UTR	3_prime_UTR_variant	0	0	-	-	-	-	-3.44554	0.00267	0.0291	0.0378	|	-0.233985	0.00683	0.00803	0.946	|	2	15	0.133333	0	31	0	6	23	0.26087	1	41	0.0243902	7	32	0.21875	1	67	0.0149254	2	25	0.08	0	21	0	0
chr1	162223410	-	T	chr1:162223410	Dnm3,Dnm3os,Mir214	.	Exon	regulatory_region_variant	0	0	162223443	33	upstream	exonic	0	<0.001	<0.001	---	|	0.821561	0.00177	<0.001	0.374	|	---	---	---	---	---	---	---	---	---	---	---	---	---	---	---	---	---	---	0	7	0	---	---	---	0
chr1	162598198	+	A	chr1:162598198	Vamp4	SINE	UTR	3_prime_UTR_variant	1	1	162596004	2194	upstream	intronic	-0.238882	0.00257	0.00303	0.846	|	1.03683	0.0629	0.0306	0.0346	|	0	25	0	0	18	0	1	27	0.037037	0	3	0	1	48	0.0208333	2	7	0.285714	0	54	0	0	11	0	0
chr1	162598204	+	A	chr1:162598204	Vamp4	SINE	UTR	3_prime_UTR_variant	1	1	162596000	2204	upstream	intronic	0	<0.001	<0.001	---	|	2.06154	0.0154	0.00369	0.0359	|	0	21	0	0	18	0	0	20	0	0	3	0	0	49	0	0	7	0	0	39	0	0	15	0	0
chr1	163865290	+	A	chr1:163865290	Kifap3	SINE	Intron	intron_variant	0	0	-	-	-	-	0	<0.001	<0.001	---	|	-1.60786	0.0241	0.0734	0.42	|	0	1	0	0	0	---	0	0	---	0	0	---	0	0	---	0	0	---	0	1	0	0	0	---	0
chr1	164226035	+	A	chr1:164226035	-	LTR	intergenic	regulatory_region_variant	0	0	-	-	-	-	0.0910767	0.947	0.889	0.0696	|	0.0154336	0.0533	0.0527	0.997	|	179	209	0.856459	199	216	0.921296	99	122	0.811475	113	118	0.957627	322	383	0.840731	239	273	0.875458	124	128	0.96875	73	78	0.935897	54
chr1	164228805	+	A	chr1:164228805	-	LTR	intergenic	regulatory_region_variant	0	0	-	-	-	-	0.194086	0.23	0.201	0.581	|	-1.75983	0.00836	0.0283	0.6	|	16	102	0.156863	20	76	0.263158	20	50	0.4	18	29	0.62069	65	319	0.203762	53	125	0.424	69	429	0.160839	23	117	0.196581	29
chr1	169950984	-	T	chr1:169950984	Hsd17b7	SINE	UTR	regulatory_region_variant	0	0	-	-	-	-	-0.0695847	0.0031	0.00325	0.374	|	2.13617	0.0316	0.00719	0.0576	|	0	45	0	0	3	0	0	34	0	0	10	0	0	48	0	0	2	0	0	37	0	0	9	0	4
chr1	170884599	-	T	chr1:170884599	Dusp12,Gm26620,Gm9929	SINE	Intron	regulatory_region_variant	0	0	170883919	680	downstream	intronic	0	<0.001	<0.001	---	|	2.99547	0.02	0.00251	0.152	|	0	9	0	0	8	0	0	16	0	0	1	0	0	3	0	0	6	0	0	5	0	0	0	---	0
chr1	170884606	-	T	chr1:170884606	Dusp12,Gm26620,Gm9929	SINE	Intron	regulatory_region_variant	1	1	170883911	695	downstream	intronic	0.928911	0.00602	0.00316	0.743	|	1.22781	0.56	0.239	0.199	|	0	7	0	2	7	0.285714	0	15	0	0	1	0	0	5	0	1	6	0.166667	0	6	0	0	0	---	5
chr1	170884607	-	T	chr1:170884607	Dusp12,Gm26620,Gm9929	SINE	Intron	regulatory_region_variant	0	0	170883911	696	downstream	intronic	0	<0.001	<0.001	---	|	2.985	0.0627	0.00792	0.246	|	0	7	0	0	7	0	0	15	0	0	1	0	0	5	0	0	5	0	0	6	0	0	0	---	0
chr1	170884615	-	T	chr1:170884615	Dusp12,Gm26620,Gm9929	SINE	Intron	regulatory_region_variant	0	0	170883902	713	downstream	intronic	0	<0.001	<0.001	---	|	0.479881	0.0323	0.0232	0.733	|	0	8	0	0	6	0	0	14	0	0	0	---	0	4	0	0	7	0	0	7	0	0	0	---	0
chr1	171052151	-	T	chr1:171052151	Fcgr3	SINE	Intron	non_coding_transcript_variant	0	0	171053691	1540	upstream	intronic	3.92088	0.0151	<0.001	0.00485	|	0	<0.001	<0.001	---	|	0	46	0	13	438	0.0296804	0	35	0	6	190	0.0315789	0	32	0	3	245	0.0122449	0	6	0	2	65	0.0307692	0
chr1	171413004	+	A	chr1:171413004	Arhgap30,Usf1	SINE	Intron	regulatory_region_variant	0	0	171413462	458	downstream	intronic	1.64335	0.00312	<0.001	0.0768	|	5.42595	0.128	0.00297	0.0138	|	0	21	0	2	178	0.011236	0	18	0	1	93	0.0107527	0	14	0	1	130	0.00769231	0	7	0	0	36	0	0
chr1	171413686	+	A	chr1:171413686	Arhgap30,Usf1	SINE	Intron	non_coding_transcript_variant	0	0	-	-	-	-	1.98784	0.00397	<0.001	0.085	|	3.89001	0.256	0.0172	0.0987	|	0	24	0	7	209	0.0334928	0	28	0	2	141	0.0141844	0	18	0	1	122	0.00819672	0	25	0	0	62	0	0
chr1	171888724	+	A	chr1:171888724	Cd84	LTR	UTR	3_prime_UTR_variant	0	0	-	-	-	-	-1.08117	<0.001	0.00212	0.112	|	1.41915	0.0134	0.00501	0.371	|	0	1404	0	0	172	0	4	1083	0.00369344	0	89	0	3	1289	0.00232739	0	154	0	0	803	0	0	66	0	6
chr1	171889121	+	A	chr1:171889121	Cd84	LTR	UTR	3_prime_UTR_variant	0	0	-	-	-	-	-2.30045	0.00237	0.0117	0.0217	|	-0.51383	0.0439	0.0626	0.478	|	25	1983	0.0126072	0	298	0	24	1222	0.0196399	1	110	0.00909091	22	1670	0.0131737	4	204	0.0196078	11	744	0.0147849	0	41	0	2
chr1	172092348	+	A	chr1:172092348	Copa,Gm37756,Gm38164	.	Exon	missense_variant	0	0	-	-	-	-	2.01654	0.0702	0.0174	0.00837	|	-0.0947024	0.136	0.146	0.746	|	6	351	0.017094	11	107	0.102804	4	281	0.0142349	8	66	0.121212	4	343	0.0116618	9	94	0.0957447	10	126	0.0793651	23	79	0.291139	8
chr1	172097069	+	A	chr1:172097069	Copa,Gm37756	SINE	Intron	non_coding_transcript_variant	0	0	172096188	881	upstream	intronic	2.61394	0.00612	<0.001	0.194	|	3.16805	0.0552	0.00614	0.0893	|	0	9	0	0	20	0	0	3	0	0	11	0	0	8	0	1	19	0.0526316	0	2	0	0	6	0	0
chr1	176729258	-	T	chr1:176729258	Cep170	SINE	intergenic	downstream_gene_variant	0	0	-	-	-	-	0	<0.001	<0.001	---	|	-0.929804	0.00235	0.00447	0.688	|	0	4	0	---	---	---	0	1	0	0	1	0	0	4	0	---	---	---	0	5	0	0	5	0	0
chr1	177449120	+	A	chr1:177449120	Zbtb18	.	UTR	3_prime_UTR_variant	0	0	-	-	-	-	-0.547169	0.00404	0.0059	0.702	|	-2.11412	0.00271	0.0117	0.294	|	0	285	0	4	233	0.0171674	2	220	0.00909091	4	193	0.0207254	4	341	0.0117302	3	247	0.0121457	3	248	0.0120968	0	120	0	0
chr1	178333255	-	T	chr1:178333255	Hnrnpu	SINE	Intron	non_coding_transcript_variant	0	0	-	-	-	-	0	<0.001	<0.001	---	|	1.27616	0.00242	<0.001	0.374	|	0	11	0	0	206	0	0	9	0	0	90	0	0	12	0	0	125	0	0	7	0	0	5	0	0
chr1	178333256	-	T	chr1:178333256	Hnrnpu	SINE	Intron	non_coding_transcript_variant	0	0	-	-	-	-	0	<0.001	<0.001	---	|	2.25539	0.00477	<0.001	0.181	|	0	11	0	0	204	0	0	9	0	0	90	0	0	12	0	0	125	0	0	7	0	0	6	0	0
chr1	178952210	-	T	chr1:178952210	Smyd3	SINE	UTR	3_prime_UTR_variant	0	0	-	-	-	-	0	<0.001	<0.001	---	|	1.19316	0.00229	<0.001	0.374	|	0	2	0	---	---	---	0	4	0	0	1	0	0	3	0	0	2	0	0	9	0	0	8	0	0
chr1	178952247	-	T	chr1:178952247	Smyd3	.	UTR	3_prime_UTR_variant	1	1	-	-	-	-	-5.25388	<0.001	0.0382	0.184	|	-3.25352	0.00637	0.0608	0.0992	|	0	1	0	---	---	---	0	2	0	0	1	0	1	4	0.25	0	1	0	2	9	0.222222	0	4	0	---
chr1	178952664	-	T	chr1:178952664	Smyd3	.	UTR	3_prime_UTR_variant	0	0	-	-	-	-	0	<0.001	<0.001	---	|	0.693947	0.154	0.095	0.664	|	0	1	0	---	---	---	0	4	0	---	---	---	0	3	0	---	---	---	---	---	---	---	---	---	---
chr1	180424210	+	A	chr1:180424210	Itpkb	.	UTR	regulatory_region_variant	0	0	-	-	-	-	0.937083	0.018	0.00939	0.261	|	-0.584753	0.00173	0.00259	0.755	|	1	87	0.0114943	1	98	0.0102041	1	73	0.0136986	5	71	0.0704225	4	100	0.04	3	108	0.0277778	3	179	0.0167598	4	232	0.0172414	0
chr1	180424263	+	A	chr1:180424263	Itpkb	.	UTR	regulatory_region_variant	0	0	-	-	-	-	-1.31627	0.0141	0.0352	0.0479	|	-2.19316	<0.001	0.00457	0.178	|	2	88	0.0227273	1	125	0.008	6	90	0.0666667	2	77	0.025974	2	107	0.0186916	3	136	0.0220588	13	268	0.0485075	5	317	0.0157729	2
chr1	180806783	-	T	chr1:180806783	Gm17275,H3f3a	SINE	Intron	non_coding_transcript_variant	0	0	-	-	-	-	0.621761	0.00154	<0.001	0.363	|	3.12193	0.00871	<0.001	0.181	|	0	56	0	3	226	0.0132743	0	29	0	0	116	0	0	60	0	0	130	0	0	16	0	0	25	0	0
chr1	180806799	-	T	chr1:180806799	Gm17275,H3f3a	SINE	Intron	non_coding_transcript_variant	0	0	180806158	641	downstream	intronic	3.85373	0.0145	<0.001	0.0281	|	1.21573	0.0217	0.00935	0.447	|	0	52	0	8	240	0.0333333	0	34	0	7	117	0.0598291	0	62	0	5	156	0.0320513	0	17	0	0	37	0	0
chr1	180808215	-	T	chr1:180808215	Gm17275,H3f3a	SINE	Intron	regulatory_region_variant	0	0	180809853	1638	upstream	intronic	0.565848	0.00258	0.00174	0.694	|	4.17238	0.0531	0.00295	0.105	|	1	36	0.0277778	0	225	0	0	48	0	3	116	0.0258621	0	52	0	2	177	0.0112994	0	27	0	0	8	0	0
chr1	180815832	+	A	chr1:180815832	H3f3a,H3f3aos	SINE	Exon	non_coding_transcript_exon_variant	0	0	-	-	-	-	6.0053	0.0642	<0.001	0.00483	|	0	<0.001	<0.001	---	|	0	15	0	5	54	0.0925926	0	8	0	5	28	0.178571	0	11	0	5	47	0.106383	0	3	0	0	7	0	0
chr1	181096455	-	T	chr1:181096455	Fgfr3-ps,Nvl	SINE	Intron	non_coding_transcript_exon_variant	1	1	-	-	-	-	0	<0.001	<0.001	---	|	2.16147	0.0983	0.022	0.151	|	0	30	0	0	2	0	0	31	0	0	1	0	0	37	0	0	2	0	0	2	0	0	6	0	0
chr1	181254710	-	T	chr1:181254710	-	SINE	intergenic	regulatory_region_variant	0	0	181254999	289	upstream	undefined	-1.4574	0.076	0.209	0.317	|	-3.32193	<0.001	0.01	0.423	|	4	17	0.235294	1	20	0.05	6	22	0.272727	3	20	0.15	4	15	0.266667	5	25	0.2	2	28	0.0714286	3	7	0.428571	1
chr1	181254721	-	T	chr1:181254721	-	SINE	intergenic	regulatory_region_variant	0	0	181254988	267	upstream	undefined	-1.05817	0.00924	0.0192	0.609	|	0	<0.001	<0.001	---	|	1	19	0.0526316	2	20	0.1	4	22	0.181818	0	21	0	2	18	0.111111	3	23	0.130435	1	21	0.047619	0	5	0	0
chr1	181255029	-	T	chr1:181255029	-	SINE	intergenic	regulatory_region_variant	0	0	181254679	350	downstream	undefined	3.33852	0.0237	0.00235	0.0994	|	0	<0.001	<0.001	---	|	1	6	0.166667	2	20	0.1	0	19	0	2	20	0.1	0	12	0	1	21	0.047619	0	15	0	0	9	0	0
chr1	181255033	-	T	chr1:181255033	-	SINE	intergenic	regulatory_region_variant	0	0	181254677	356	downstream	undefined	2.67509	0.0296	0.00464	0.321	|	0	<0.001	<0.001	---	|	0	6	0	2	17	0.117647	1	20	0.05	4	20	0.2	0	12	0	3	26	0.115385	3	15	0.2	0	9	0	0
chr1	182879982	+	A	chr1:182879982	Susd4	LTR	Intron	intron_variant	1	1	182878649	1333	upstream	intronic	0	<0.001	<0.001	---	|	-2.57678	0.00272	0.0163	0.199	|	---	---	---	---	---	---	---	---	---	---	---	---	0	1	0	---	---	---	0	0	---	0	3	0	0
chr1	183324374	+	A	chr1:183324374	Aida,Mia3	SINE	UTR	3_prime_UTR_variant	0	0	183326316	1942	downstream	undefined	0	<0.001	<0.001	---	|	0.657792	0.0621	0.0394	0.784	|	1	15	0.0666667	---	---	---	0	14	0	---	---	---	0	13	0	0	4	0	0	28	0	---	---	---	0
chr1	183324375	+	A	chr1:183324375	Aida,Mia3	SINE	UTR	3_prime_UTR_variant	0	0	183326315	1940	downstream	undefined	0	<0.001	<0.001	---	|	1.05118	0.0595	0.0287	0.645	|	1	15	0.0666667	---	---	---	0	14	0	---	---	---	0	11	0	0	4	0	0	26	0	---	---	---	0
chr1	183409775	+	A	chr1:183409775	Gm37986,Taf1a	SINE	intergenic	3_prime_UTR_variant	0	0	183411703	1928	downstream	undefined	4.56181	0.102	0.0043	0.0252	|	1.12102	0.498	0.229	0.0195	|	2	22	0.0909091	1	15	0.0666667	0	20	0	3	10	0.3	0	24	0	1	41	0.0243902	3	43	0.0697674	6	42	0.142857	0
chr1	183409776	+	A	chr1:183409776	Gm37986,Taf1a	SINE	intergenic	3_prime_UTR_variant	0	0	183411703	1927	downstream	undefined	-2.10514	<0.001	0.0043	0.175	|	0.835798	0.136	0.0764	0.0239	|	2	22	0.0909091	0	15	0	0	20	0	0	10	0	0	24	0	0	42	0	3	43	0.0697674	0	42	0	0
chr1	183409863	+	A	chr1:183409863	Gm37986,Taf1a	SINE	intergenic	3_prime_UTR_variant	0	0	-	-	-	-	-1.13264	<0.001	0.00219	0.363	|	2.41763	0.235	0.0441	0.00578	|	0	38	0	0	19	0	2	18	0.111111	0	16	0	0	45	0	0	46	0	0	47	0	0	63	0	0
chr1	183411711	+	A	chr1:183411711	Gm37986,Taf1a	SINE	intergenic	downstream_gene_variant	0	0	-	-	-	-	0	<0.001	<0.001	---	|	3.96866	0.0368	0.00235	0.0756	|	0	1	0	0	5	0	0	4	0	0	1	0	0	2	0	0	3	0	---	---	---	0	14	0	0
chr1	184901589	-	T	chr1:184901589	Mark1	SINE	Intron	intron_variant	0	0	-	-	-	-	0	<0.001	<0.001	---	|	-1.43169	<0.001	0.0027	0.374	|	0	0	---	0	0	---	0	0	---	---	---	---	---	---	---	0	0	---	0	0	---	0	0	---	0
chr1	184901633	-	T	chr1:184901633	Mark1	SINE	Intron	intron_variant	1	1	-	-	-	-	0	<0.001	<0.001	---	|	0.427362	0.0621	0.0462	0.858	|	0	0	---	0	0	---	0	0	---	---	---	---	---	---	---	0	0	---	0	2	0	0	0	---	0
chr1	184904227	-	T	chr1:184904227	Mark1	SINE	Intron	intron_variant	1	1	-	-	-	-	0	<0.001	<0.001	---	|	-1.25307	<0.001	0.00238	0.374	|	0	0	---	0	0	---	0	0	---	---	---	---	---	---	---	0	0	---	0	0	---	0	0	---	0
chr1	185357196	+	A	chr1:185357196	4930532G15Rik,Bpnt1	SINE	UTR	3_prime_UTR_variant	0	0	-	-	-	-	-1.26472	<0.001	0.0024	0.391	|	1.34161	0.046	0.0181	0.189	|	0	31	0	---	---	---	0	21	0	---	---	---	1	30	0.0333333	0	3	0	0	20	0	0	16	0	0
chr1	188971923	-	T	chr1:188971923	Kctd3	.	UTR	3_prime_UTR_variant	0	0	-	-	-	-	0.755474	0.00405	0.0024	0.653	|	0.985592	0.106	0.0535	0.104	|	1	61	0.0163934	0	66	0	0	60	0	1	55	0.0181818	1	86	0.0116279	0	75	0	0	244	0	3	292	0.010274	0
chr1	191621769	+	A	chr1:191621769	Ints7	SINE	UTR	3_prime_UTR_variant	0	0	-	-	-	-	-1.24218	<0.001	0.00237	0.374	|	0.91647	0.0158	0.00837	0.668	|	---	---	---	0	5	0	0	23	0	0	2	0	2	27	0.0740741	0	1	0	0	82	0	0	38	0	0
chr1	195096632	-	T	chr1:195096632	Cd46,Cr1l	LTR	intergenic	downstream_gene_variant	0	0	-	-	-	-	0	<0.001	<0.001	---	|	-1.35598	0.00174	0.00446	0.298	|	0	48	0	0	16	0	0	45	0	0	13	0	0	70	0	0	33	0	0	117	0	0	43	0	0
chr10	7679219	-	T	chr10:7679219	Lats1,Nup43,Pcmt1	SINE	intergenic	intron_variant	0	0	-	-	-	-	0	<0.001	<0.001	---	|	1.01178	0.00202	<0.001	0.374	|	0	7	0	0	12	0	0	11	0	0	3	0	0	13	0	0	3	0	0	18	0	0	0	---	0
chr10	7679368	-	T	chr10:7679368	Lats1,Nup43,Pcmt1	SINE	intergenic	intron_variant	0	0	-	-	-	-	-1.08439	<0.001	0.00212	0.363	|	-2.51752	0.0079	0.0452	0.436	|	0	10	0	0	16	0	0	1	0	0	4	0	1	11	0.0909091	0	1	0	0	8	0	0	11	0	0
chr10	7679375	-	T	chr10:7679375	Lats1,Nup43,Pcmt1	SINE	intergenic	intron_variant	0	0	-	-	-	-	0	<0.001	<0.001	---	|	-2.46209	0.00242	0.0133	0.193	|	0	10	0	0	19	0	0	1	0	0	4	0	0	11	0	0	4	0	0	8	0	0	11	0	0
chr10	9623312	-	T	chr10:9623312	Samd5	DNA	UTR	3_prime_UTR_variant	0	0	-	-	-	-	0	<0.001	<0.001	---	|	1.17566	0.00226	<0.001	0.374	|	0	11	0	---	---	---	0	10	0	---	---	---	0	14	0	---	---	---	0	16	0	0	4	0	0
chr10	11296325	+	A	chr10:11296325	Fbxo30	SINE	UTR	3_prime_UTR_variant	0	0	-	-	-	-	2.75119	0.00673	<0.001	0.0891	|	5.61636	0.0491	<0.001	0.0172	|	0	34	0	2	49	0.0408163	0	24	0	1	68	0.0147059	0	33	0	9	58	0.155172	0	23	0	0	57	0	0
chr10	11296374	+	A	chr10:11296374	Fbxo30	SINE	UTR	3_prime_UTR_variant	0	0	-	-	-	-	3.59459	0.0121	<0.001	0.026	|	4.09711	0.0389	0.00227	0.0449	|	0	74	0	4	109	0.0366972	0	60	0	4	124	0.0322581	0	95	0	5	138	0.0362319	0	98	0	0	100	0	0
chr10	11296383	+	A	chr10:11296383	Fbxo30	SINE	UTR	3_prime_UTR_variant	0	0	-	-	-	-	2.38287	0.00827	0.00159	0.182	|	0	<0.001	<0.001	---	|	0	75	0	1	127	0.00787402	0	67	0	2	128	0.015625	0	110	0	6	147	0.0408163	0	113	0	7	110	0.0636364	1
chr10	20340927	+	A	chr10:20340927	Bclaf1	.	UTR	3_prime_UTR_variant	0	0	-	-	-	-	-3.22167	0.00165	0.0154	0.0492	|	-0.129043	0.0147	0.0161	0.835	|	10	178	0.0561798	1	49	0.0204082	10	117	0.0854701	0	65	0	11	231	0.047619	0	54	0	5	85	0.0588235	0	29	0	0
chr10	29228095	+	A	chr10:29228095	9330159F19Rik	SINE	UTR	3_prime_UTR_variant	0	0	-	-	-	-	---	---	---	---	|	2.13276	0.192	0.0439	0.224	|	---	---	---	---	---	---	---	---	---	---	---	---	---	---	---	0	0	---	0	2	0	---	---	---	0
chr10	33988833	-	T	chr10:33988833	AC153962.3	SINE	Intron	non_coding_transcript_exon_variant	0	0	33989225	392	upstream	intronic	---	---	---	---	|	0.0918863	0.00758	0.00711	0.972	|	0	3	0	---	---	---	0	1	0	---	---	---	---	---	---	---	---	---	---	---	---	---	---	---	---
chr10	33989252	-	T	chr10:33989252	AC153962.3	SINE	Intron	splice_region_variant	0	0	33988806	446	downstream	exonic	---	---	---	---	|	-1.59316	0.0237	0.0714	0.362	|	---	---	---	---	---	---	---	---	---	---	---	---	---	---	---	---	---	---	---	---	---	---	---	---	---
chr10	33989255	-	T	chr10:33989255	AC153962.3	SINE	Intron	splice_region_variant	0	0	33988801	454	downstream	exonic	---	---	---	---	|	2.21543	0.436	0.0938	0.289	|	---	---	---	---	---	---	---	---	---	---	---	---	---	---	---	---	---	---	---	---	---	---	---	---	---
chr10	33992456	-	T	chr10:33992456	AC153962.3,Rwdd1	SINE	intergenic	non_coding_transcript_exon_variant	0	0	33993366	910	upstream	undefined	---	---	---	---	|	-0.374778	0.035	0.0454	0.878	|	---	---	---	---	---	---	---	---	---	---	---	---	0	1	0	---	---	---	---	---	---	---	---	---	10
chr10	33992477	-	T	chr10:33992477	AC153962.3,Rwdd1	SINE	intergenic	non_coding_transcript_exon_variant	0	0	33993342	865	upstream	undefined	---	---	---	---	|	0.0414765	0.465	0.452	0.896	|	---	---	---	---	---	---	---	---	---	---	---	---	---	---	---	---	---	---	---	---	---	---	---	---	10
chr10	33992478	-	T	chr10:33992478	AC153962.3,Rwdd1	SINE	intergenic	non_coding_transcript_exon_variant	1	1	33993341	863	upstream	undefined	---	---	---	---	|	0.0297983	0.227	0.222	0.943	|	---	---	---	---	---	---	---	---	---	---	---	---	---	---	---	---	---	---	---	---	---	---	---	---	10
chr10	33993365	-	T	chr10:33993365	AC153962.3,Rwdd1	SINE	intergenic	non_coding_transcript_exon_variant	1	1	33992452	913	downstream	undefined	---	---	---	---	|	0.951266	0.00193	<0.001	0.374	|	0	1	0	---	---	---	---	---	---	---	---	---	---	---	---	---	---	---	---	---	---	---	---	---	---
chr10	33993372	-	T	chr10:33993372	AC153962.3,Rwdd1	SINE	intergenic	non_coding_transcript_exon_variant	0	0	33992446	926	downstream	undefined	---	---	---	---	|	0.80298	0.114	0.0655	0.101	|	0	1	0	---	---	---	---	---	---	---	---	---	---	---	---	---	---	---	---	---	---	---	---	---	---
chr10	39651470	-	T	chr10:39651470	E130307A14Rik,Traf3ip2	LTR	Intron	non_coding_transcript_variant	0	0	-	-	-	-	0	<0.001	<0.001	---	|	0.845978	0.0438	0.0244	0.765	|	0	6	0	0	4	0	0	4	0	0	6	0	0	1	0	0	5	0	0	0	---	0	0	---	0
chr10	39655853	-	T	chr10:39655853	AC160403.1,E130307A14Rik,Traf3ip2	LTR	Exon	non_coding_transcript_exon_variant	0	0	-	-	-	-	0	<0.001	<0.001	---	|	1.27802	0.00464	0.00191	0.547	|	0	11	0	0	0	---	0	17	0	0	4	0	0	16	0	0	0	---	0	1	0	0	5	0	0
chr10	39858728	+	A	chr10:39858728	Rev3l	LINE	Intron	NMD_transcript_variant	0	0	39857912	816	upstream	intronic	0	<0.001	<0.001	---	|	1.52707	0.0695	0.0241	0.624	|	0	13	0	0	8	0	0	1	0	0	5	0	0	6	0	0	15	0	0	3	0	0	0	---	0
chr10	39858729	+	A	chr10:39858729	Rev3l	LINE	Intron	NMD_transcript_variant	0	0	39857912	817	upstream	intronic	1.32763	0.00251	<0.001	0.363	|	6.56742	0.294	0.0031	0.0177	|	0	13	0	2	8	0.25	0	1	0	0	5	0	0	6	0	0	15	0	0	3	0	0	0	---	0
chr10	39858730	+	A	chr10:39858730	Rev3l	LINE	Intron	NMD_transcript_variant	0	0	39857912	818	upstream	intronic	-2.31211	0.00201	0.01	0.415	|	1.60967	0.282	0.0923	0.429	|	0	14	0	0	8	0	0	1	0	0	5	0	0	6	0	1	15	0.0666667	0	3	0	0	0	---	1
chr10	39858731	+	A	chr10:39858731	Rev3l	LINE	Intron	NMD_transcript_variant	0	0	-	-	-	-	0	<0.001	<0.001	---	|	2.41784	0.0774	0.0145	0.191	|	0	14	0	0	8	0	0	1	0	0	5	0	0	6	0	0	15	0	0	3	0	0	0	---	0
chr10	39858732	+	A	chr10:39858732	Rev3l	LINE	Intron	NMD_transcript_variant	0	0	-	-	-	-	0	<0.001	<0.001	---	|	4.24667	0.117	0.00617	0.0399	|	0	14	0	0	8	0	0	1	0	0	5	0	0	6	0	0	15	0	0	3	0	0	0	---	0
chr10	39858733	+	A	chr10:39858733	Rev3l	LINE	Intron	NMD_transcript_variant	0	0	39857905	828	upstream	intronic	1.16096	0.00224	<0.001	0.363	|	8.15509	0.285	<0.001	4.2e-06	|	0	14	0	1	8	0.125	0	1	0	0	5	0	0	6	0	0	15	0	0	3	0	0	0	---	0
chr10	39858746	+	A	chr10:39858746	Rev3l	LINE	Intron	NMD_transcript_variant	1	1	39857897	849	upstream	Intron	0	<0.001	<0.001	---	|	6.78554	0.11	<0.001	6.91e-05	|	0	14	0	0	8	0	0	2	0	0	5	0	0	7	0	0	12	0	0	3	0	0	0	---	0
chr10	42275461	-	T	chr10:42275461	Foxo3	.	UTR	regulatory_region_variant	0	0	-	-	-	-	1.30314	0.0116	0.00469	0.291	|	0.857369	0.00432	0.00238	0.709	|	2	157	0.0127389	2	222	0.00900901	4	159	0.0251572	3	193	0.015544	0	142	0	3	232	0.012931	2	60	0.0333333	2	77	0.025974	0
chr10	43607494	+	A	chr10:43607494	F930017D23Rik	LTR	Intron	non_coding_transcript_variant	0	0	-	-	-	-	2.84431	0.0156	0.00217	0.0958	|	---	---	---	---	|	0	40	0	2	39	0.0512821	0	31	0	1	53	0.0188679	4	38	0.105263	3	36	0.0833333	0	58	0	12	67	0.179104	0
chr10	43607772	+	A	chr10:43607772	F930017D23Rik	SINE	Intron	non_coding_transcript_variant	0	0	43605613	2159	upstream	intronic	1.63993	0.0125	0.00401	0.405	|	---	---	---	---	|	2	23	0.0869565	2	26	0.0769231	1	21	0.047619	0	28	0	0	42	0	0	24	0	0	31	0	1	59	0.0169492	0
chr10	43607779	+	A	chr10:43607779	F930017D23Rik	SINE	Intron	non_coding_transcript_variant	0	0	-	-	-	-	1.82971	0.0334	0.00938	0.278	|	---	---	---	---	|	0	23	0	1	24	0.0416667	1	21	0.047619	1	29	0.0344828	0	44	0	0	25	0	4	31	0.129032	2	50	0.04	8
chr10	43607789	+	A	chr10:43607789	F930017D23Rik	SINE	Intron	non_coding_transcript_variant	0	0	43605596	2193	upstream	intronic	0.908891	0.412	0.22	0.142	|	---	---	---	---	|	6	19	0.315789	13	27	0.481481	1	17	0.0588235	10	27	0.37037	3	37	0.0810811	8	23	0.347826	10	30	0.333333	17	49	0.346939	53
chr10	43607795	+	A	chr10:43607795	F930017D23Rik	SINE	Intron	non_coding_transcript_variant	0	0	-	-	-	-	0.582572	0.203	0.136	0.519	|	---	---	---	---	|	3	19	0.157895	3	27	0.111111	2	20	0.1	9	24	0.375	1	30	0.0333333	8	24	0.333333	8	33	0.242424	2	49	0.0408163	20
chr10	43607796	+	A	chr10:43607796	F930017D23Rik	SINE	Intron	non_coding_transcript_variant	0	0	43605588	2208	upstream	intronic	1.39813	0.154	0.0584	0.304	|	---	---	---	---	|	0	20	0	4	27	0.148148	2	19	0.105263	2	24	0.0833333	1	30	0.0333333	2	23	0.0869565	4	32	0.125	12	48	0.25	37
chr10	43607797	+	A	chr10:43607797	F930017D23Rik	SINE	Intron	non_coding_transcript_variant	0	0	43608315	518	downstream	intronic	1.61122	0.285	0.0934	0.237	|	---	---	---	---	|	0	20	0	4	27	0.148148	2	19	0.105263	7	23	0.304348	2	30	0.0666667	4	23	0.173913	12	33	0.363636	26	48	0.541667	53
chr10	43607804	+	A	chr10:43607804	F930017D23Rik	SINE	Intron	non_coding_transcript_variant	0	0	43608308	504	downstream	intronic	-1.40434	0.0476	0.126	0.389	|	---	---	---	---	|	6	17	0.352941	2	23	0.0869565	2	19	0.105263	4	24	0.166667	1	28	0.0357143	4	24	0.166667	11	38	0.289474	0	42	0	5
chr10	43607864	+	A	chr10:43607864	F930017D23Rik	SINE	Intron	non_coding_transcript_variant	0	0	43605523	2341	upstream	intronic	-0.602555	0.0801	0.122	0.69	|	---	---	---	---	|	4	14	0.285714	5	19	0.263158	3	17	0.176471	0	16	0	2	27	0.0740741	4	19	0.210526	2	37	0.0540541	12	48	0.25	10
chr10	43607870	+	A	chr10:43607870	F930017D23Rik	SINE	Intron	non_coding_transcript_variant	0	0	43605516	2354	upstream	intronic	0.120696	0.0806	0.0741	0.713	|	---	---	---	---	|	4	13	0.307692	3	18	0.166667	4	15	0.266667	3	14	0.214286	0	27	0	0	17	0	4	31	0.129032	11	48	0.229167	3
chr10	49242461	-	T	chr10:49242461	AC153801.1,Grik2	.	Intron	non_coding_transcript_exon_variant	1	1	-	-	-	-	0	<0.001	<0.001	---	|	0	1	1	---	|	---	---	---	---	---	---	---	---	---	---	---	---	---	---	---	---	---	---	---	---	---	2	2	1	0
chr10	49242488	-	T	chr10:49242488	AC153801.1,Grik2	.	Intron	non_coding_transcript_exon_variant	1	1	-	-	-	-	0	<0.001	<0.001	---	|	0.681912	0.64	0.399	0.17	|	---	---	---	---	---	---	---	---	---	---	---	---	---	---	---	---	---	---	---	---	---	2	2	1	0
chr10	49242544	-	T	chr10:49242544	AC153801.1,Grik2	.	Intron	non_coding_transcript_exon_variant	1	1	49244218	1674	upstream	intronic	0	<0.001	<0.001	---	|	1.11724	0.139	0.0642	0.623	|	---	---	---	---	---	---	---	---	---	---	---	---	---	---	---	---	---	---	---	---	---	0	2	0	0
chr10	49244330	-	T	chr10:49244330	Grik2	.	Exon	missense_variant	1	1	-	-	-	-	0.173962	1	0.886	0.5	|	-0.0339241	0.864	0.885	0.745	|	---	---	---	---	---	---	---	---	---	---	---	---	---	---	---	---	---	---	---	---	---	---	---	---	11
chr10	49244334	-	T	chr10:49244334	Grik2	.	Exon	missense_variant	1	1	-	-	-	-	0	<0.001	<0.001	---	|	1.72081	0.0126	0.00382	0.454	|	---	---	---	---	---	---	---	---	---	---	---	---	---	---	---	---	---	---	---	---	---	---	---	---	0
chr10	49244347	-	T	chr10:49244347	Grik2	.	Exon	synonymous_variant	0	0	-	-	-	-	4.73286	0.745	0.028	0.476	|	-0.246065	0.122	0.145	0.308	|	---	---	---	---	---	---	---	---	---	---	---	---	---	---	---	---	---	---	---	---	---	---	---	---	11
chr10	49249912	-	T	chr10:49249912	Grik2	LINE	Intron	non_coding_transcript_variant	1	1	49248723	1189	downstream	intronic	---	---	---	---	|	6.3423	0.219	0.0027	0.0329	|	---	---	---	---	---	---	---	---	---	---	---	---	---	---	---	---	---	---	---	---	---	---	---	---	---
chr10	49249921	-	T	chr10:49249921	Grik2	LINE	Intron	non_coding_transcript_variant	0	0	-	-	-	-	---	---	---	---	|	-1.10107	0.0125	0.0269	0.672	|	---	---	---	---	---	---	---	---	---	---	---	---	---	---	---	---	---	---	---	---	---	---	---	---	---
chr10	49272776	-	T	chr10:49272776	Grik2	.	Exon	missense_variant	1	1	-	-	-	-	---	---	---	---	|	0.108832	0.72	0.668	0.44	|	---	---	---	---	---	---	---	---	---	---	---	---	---	---	---	---	---	---	0	2	0	---	---	---	---
chr10	49272789	-	T	chr10:49272789	Grik2	.	Exon	missense_variant	1	1	-	-	-	-	---	---	---	---	|	0.148976	0.718	0.647	0.286	|	---	---	---	---	---	---	---	---	---	---	---	---	---	---	---	---	---	---	2	2	1	---	---	---	---
chr10	57507125	+	A	chr10:57507125	Hsf2	.	Intron	3_prime_UTR_variant	1	1	57507928	803	downstream	intronic	0	<0.001	<0.001	---	|	2.06926	0.113	0.0269	0.11	|	0	4	0	0	3	0	0	1	0	0	0	---	0	10	0	0	3	0	0	2	0	0	4	0	0
chr10	57507155	+	A	chr10:57507155	Hsf2	.	Intron	3_prime_UTR_variant	0	0	-	-	-	-	0	<0.001	<0.001	---	|	-1.35917	<0.001	0.00257	0.374	|	0	3	0	0	2	0	0	1	0	0	0	---	0	8	0	0	4	0	0	4	0	0	4	0	0
chr10	57507156	+	A	chr10:57507156	Hsf2	.	Intron	3_prime_UTR_variant	1	1	-	-	-	-	-1.19307	<0.001	0.00229	0.363	|	2.71334	0.0168	0.00257	0.375	|	0	3	0	0	2	0	0	1	0	0	0	---	1	7	0.142857	0	5	0	0	4	0	0	4	0	0
chr10	57507167	+	A	chr10:57507167	Hsf2	.	Intron	3_prime_UTR_variant	1	1	-	-	-	-	0	<0.001	<0.001	---	|	2.6515	0.0364	0.0058	0.214	|	0	3	0	0	2	0	0	0	---	0	0	---	0	6	0	0	5	0	0	4	0	0	4	0	0
chr10	57507893	+	A	chr10:57507893	Hsf2	.	Intron	intron_variant	0	0	-	-	-	-	0	<0.001	<0.001	---	|	5.18671	0.0364	<0.001	0.0171	|	0	3	0	0	0	---	0	1	0	0	0	---	0	5	0	0	2	0	0	15	0	0	0	---	0
chr10	57507908	+	A	chr10:57507908	Hsf2	.	Intron	intron_variant	1	1	-	-	-	-	0	<0.001	<0.001	---	|	2.13296	0.0105	0.00238	0.222	|	0	2	0	0	0	---	0	1	0	0	0	---	0	4	0	0	2	0	0	15	0	0	0	---	0
chr10	57507916	+	A	chr10:57507916	Hsf2	.	Intron	intron_variant	1	1	57507140	776	upstream	intronic	0	<0.001	<0.001	---	|	2.41984	0.0112	0.00209	0.159	|	0	2	0	0	0	---	0	2	0	0	0	---	0	4	0	0	2	0	0	15	0	0	0	---	0
chr10	57516045	-	T	chr10:57516045	Hsf2,Serinc1	.	UTR	3_prime_UTR_variant	0	0	-	-	-	-	0	<0.001	<0.001	---	|	-0.947452	0.000552	0.00107	0.107	|	0	609	0	0	638	0	0	491	0	0	834	0	0	797	0	0	716	0	0	1163	0	0	929	0	0
chr10	58489654	+	A	chr10:58489654	Ranbp2	SINE	Intron	intron_variant	0	0	-	-	-	-	4.8364	0.0733	0.00257	0.0357	|	1.63882	0.615	0.197	0.446	|	0	10	0	15	165	0.0909091	0	12	0	17	135	0.125926	2	7	0.285714	19	120	0.158333	0	6	0	0	52	0	0
chr10	59897976	+	A	chr10:59897976	Dnajb12	Simple	UTR	regulatory_region_variant	0	0	-	-	-	-	-4.40995	0.00243	0.0517	0.0107	|	-2.70785	<0.001	0.00653	0.179	|	4	28	0.142857	1	71	0.0140845	1	7	0.142857	0	10	0	0	7	0	0	15	0	18	120	0.15	1	68	0.0147059	3
chr10	59897978	+	A	chr10:59897978	Dnajb12	Simple	UTR	regulatory_region_variant	0	0	59895797	2181	upstream	intronic	-4.16979	0.00933	0.168	0.0634	|	-2.86337	<0.001	0.00728	0.178	|	3	30	0.1	9	69	0.130435	3	8	0.375	0	11	0	4	7	0.571429	0	15	0	10	132	0.0757576	5	76	0.0657895	4
chr10	59985231	-	T	chr10:59985231	Anapc16	SINE	intergenic	downstream_gene_variant	1	1	-	-	-	-	-4.36623	<0.001	0.0206	0.184	|	3.67663	0.0909	0.00711	0.117	|	1	12	0.0833333	0	1	0	2	19	0.105263	0	9	0	0	19	0	---	---	---	0	9	0	---	---	---	0
chr10	59985383	-	T	chr10:59985383	Anapc16	SINE	intergenic	downstream_gene_variant	0	0	59986665	1282	upstream	undefined	0	<0.001	<0.001	---	|	3.1536	0.116	0.0131	0.164	|	0	19	0	0	2	0	0	16	0	0	3	0	0	19	0	0	6	0	0	13	0	0	6	0	---
chr10	59985550	-	T	chr10:59985550	Anapc16	SINE	intergenic	downstream_gene_variant	0	0	59983326	2224	downstream	undefined	-1.78961	<0.001	0.00346	0.391	|	-2.45424	0.00323	0.0177	0.207	|	0	9	0	0	3	0	0	8	0	0	1	0	1	7	0.142857	0	7	0	0	21	0	---	---	---	---
chr10	59985600	-	T	chr10:59985600	Anapc16	SINE	intergenic	downstream_gene_variant	0	0	-	-	-	-	0	<0.001	<0.001	---	|	5.0922	0.281	0.00824	0.0635	|	0	8	0	0	4	0	0	13	0	---	---	---	0	9	0	0	2	0	0	17	0	0	2	0	---
chr10	59987679	-	T	chr10:59987679	Anapc16	SINE	UTR	regulatory_region_variant	0	0	59988503	824	upstream	UTR	1.31367	0.0343	0.0138	0.454	|	-0.5821	<0.001	0.0015	0.374	|	0	46	0	0	4	0	0	60	0	2	16	0.125	2	55	0.0363636	0	10	0	2	106	0.0188679	2	15	0.133333	4
chr10	59987680	-	T	chr10:59987680	Anapc16	SINE	UTR	regulatory_region_variant	0	0	59988502	822	upstream	UTR	-0.965272	0.00511	0.00998	0.581	|	-2.64563	<0.001	0.00626	0.0719	|	0	46	0	0	4	0	1	61	0.0163934	2	16	0.125	0	56	0	0	10	0	2	106	0.0188679	2	14	0.142857	5
chr10	60133278	+	A	chr10:60133278	Spock2	.	UTR	3_prime_UTR_variant	0	0	-	-	-	-	-1.04218	<0.001	0.00206	0.374	|	0.0223407	0.0237	0.0233	0.951	|	0	0	---	0	0	---	0	4	0	0	2	0	0	2	0	---	---	---	1	27	0.037037	0	22	0	0
chr10	60133279	+	A	chr10:60133279	Spock2	.	UTR	3_prime_UTR_variant	0	0	-	-	-	-	0	<0.001	<0.001	---	|	0.972224	0.0485	0.0247	0.00461	|	0	0	---	0	0	---	0	4	0	0	2	0	0	2	0	---	---	---	0	27	0	0	22	0	0
chr10	61099884	-	T	chr10:61099884	Sgpl1	.	UTR	3_prime_UTR_variant	0	0	-	-	-	-	-1.88155	0.0123	0.0452	0.00378	|	0.210803	0.0575	0.0497	0.251	|	17	515	0.0330097	2	166	0.0120482	27	386	0.0699482	3	127	0.023622	36	486	0.0740741	7	220	0.0318182	13	292	0.0445205	3	193	0.015544	14
chr10	61429392	-	T	chr10:61429392	Eif4ebp2,Nodal	.	UTR	3_prime_UTR_variant	0	0	-	-	-	-	-1.11162	0.00381	0.00823	0.193	|	0.207739	0.00207	0.00179	0.857	|	10	934	0.0107066	2	265	0.00754717	7	624	0.0112179	3	168	0.0178571	5	769	0.00650195	0	253	0	10	636	0.0157233	0	212	0	0
chr10	61433462	-	T	chr10:61433462	Eif4ebp2	.	UTR	3_prime_UTR_variant	0	0	-	-	-	-	-0.210783	0.0167	0.0193	0.634	|	-2.01291	0.00344	0.0139	0.135	|	29	339	0.0855457	14	101	0.138614	21	268	0.0783582	8	66	0.121212	29	292	0.0993151	6	86	0.0697674	16	208	0.0769231	1	55	0.0181818	0
chr10	61582084	+	A	chr10:61582084	Gm28447,Lrrc20	SINE	UTR	3_prime_UTR_variant	0	0	-	-	-	-	0	<0.001	<0.001	---	|	-0.0238653	0.016	0.0162	0.982	|	0	25	0	---	---	---	0	22	0	0	0	---	0	35	0	---	---	---	0	65	0	0	4	0	0
chr10	61742830	-	T	chr10:61742830	Aifm2,H2afy2	LTR	Intron	intron_variant	0	0	-	-	-	-	1.66096	0.00316	<0.001	0.363	|	2.40735	0.0428	0.00806	0.456	|	0	1	0	0	0	---	0	2	0	0	0	---	0	1	0	0	0	---	0	0	---	2	2	1	0
chr10	62644440	-	T	chr10:62644440	Ddx50	SINE	Intron	regulatory_region_variant	0	0	-	-	-	-	0	<0.001	<0.001	---	|	1.60514	0.0249	0.0082	0.396	|	0	15	0	0	2	0	0	12	0	0	2	0	0	11	0	0	4	0	0	4	0	0	2	0	0
chr10	62767955	-	T	chr10:62767955	Ccar1,Snord98	SINE	Intron	intron_variant	0	0	62769866	1911	upstream	intronic	0.959388	0.00194	<0.001	0.363	|	3.62973	0.268	0.0217	0.151	|	0	22	0	0	59	0	0	18	0	0	28	0	0	21	0	2	37	0.0540541	0	1	0	0	3	0	0
chr10	62809763	-	T	chr10:62809763	Tet1	SINE	UTR	3_prime_UTR_variant	1	1	62810055	292	upstream	UTR	-9.30482	<0.001	0.632	0.0451	|	0.00296357	0.258	0.257	0.997	|	2	5	0.4	0	0	---	3	4	0.75	---	---	---	1	1	1	0	3	0	---	---	---	0	0	---	---
chr10	67241480	+	A	chr10:67241480	Jmjd1c	LTR	Intron	non_coding_transcript_variant	0	0	-	-	-	-	0	<0.001	<0.001	---	|	7.27687	0.155	<0.001	4.03e-06	|	0	7	0	0	133	0	0	12	0	0	69	0	0	11	0	0	70	0	0	1	0	0	8	0	0
chr10	67241511	+	A	chr10:67241511	Jmjd1c	LTR	Intron	non_coding_transcript_variant	1	1	-	-	-	-	0.613397	0.00153	<0.001	0.363	|	5.01059	0.0322	<0.001	0.0177	|	0	9	0	0	133	0	0	8	0	0	66	0	0	17	0	1	78	0.0128205	0	1	0	0	11	0	0
chr10	67546540	-	T	chr10:67546540	Ado,Egr2	LTR	UTR	3_prime_UTR_variant	0	0	-	-	-	-	-3.16083	0.0108	0.0967	0.129	|	-2.9042	0.00511	0.0383	0.0173	|	10	62	0.16129	6	74	0.0810811	3	23	0.130435	6	45	0.133333	17	68	0.25	13	88	0.147727	19	71	0.267606	0	25	0	0
chr10	67546542	-	T	chr10:67546542	Ado,Egr2	LTR	UTR	3_prime_UTR_variant	0	0	67546567	25	upstream	UTR	-2.4279	0.023	0.124	0.143	|	-0.695437	0.0169	0.0273	0.595	|	9	63	0.142857	8	76	0.105263	8	23	0.347826	5	46	0.108696	13	71	0.183099	10	92	0.108696	3	72	0.0416667	3	25	0.12	4
chr10	72663552	+	A	chr10:72663552	Zwint	LTR	Intron	intron_variant	0	0	-	-	-	-	0	<0.001	<0.001	---	|	0.0942143	0.00251	0.00235	0.959	|	0	14	0	0	14	0	0	12	0	0	11	0	0	19	0	0	23	0	0	2	0	0	13	0	0
chr10	72663576	+	A	chr10:72663576	Zwint	LTR	Intron	intron_variant	1	1	-	-	-	-	-0.148847	0.00184	0.00204	0.924	|	6.18129	0.0726	<0.001	4.82e-05	|	0	19	0	1	26	0.0384615	1	14	0.0714286	0	8	0	0	17	0	0	27	0	0	2	0	0	13	0	0
chr10	76041558	+	A	chr10:76041558	Zfp280b	SINE	UTR	3_prime_UTR_variant	0	0	-	-	-	-	0	<0.001	<0.001	---	|	0.665305	0.0145	0.00917	0.743	|	0	10	0	0	3	0	0	10	0	0	4	0	0	11	0	0	8	0	0	18	0	0	15	0	0
chr10	76555241	+	A	chr10:76555241	4930483K19Rik,Lss	SINE	UTR	3_prime_UTR_variant	0	0	76555245	4	downstream	UTR	0	<0.001	<0.001	---	|	1.17535	0.0281	0.0124	0.331	|	0	5	0	---	---	---	0	4	0	0	1	0	0	9	0	---	---	---	0	15	0	---	---	---	0
chr10	76555582	+	A	chr10:76555582	4930483K19Rik,Lss	SINE	Intron	non_coding_transcript_exon_variant	1	1	-	-	-	-	0	<0.001	<0.001	---	|	-0.545337	0.0175	0.0256	0.845	|	0	12	0	0	6	0	0	5	0	---	---	---	0	8	0	0	1	0	0	6	0	---	---	---	0
chr10	76555590	+	A	chr10:76555590	4930483K19Rik,Lss	SINE	Intron	non_coding_transcript_exon_variant	1	1	-	-	-	-	0	<0.001	<0.001	---	|	0.391416	0.307	0.234	0.415	|	0	12	0	0	6	0	1	5	0.2	---	---	---	0	8	0	0	1	0	0	8	0	---	---	---	0
chr10	76556528	+	A	chr10:76556528	4930483K19Rik,Lss	SINE	Intron	non_coding_transcript_exon_variant	0	0	-	-	-	-	0	<0.001	<0.001	---	|	2.08664	0.0219	0.00516	0.0604	|	0	6	0	0	1	0	0	9	0	0	2	0	0	6	0	0	2	0	0	15	0	0	4	0	0
chr10	77257873	-	T	chr10:77257873	Gm10941,Pofut2	SINE	Exon	non_coding_transcript_exon_variant	0	0	77258325	452	upstream	intronic	0	<0.001	<0.001	---	|	-1.6834	0.0196	0.063	0.559	|	0	1	0	---	---	---	---	---	---	0	1	0	---	---	---	---	---	---	0	1	0	0	2	0	0
chr10	77322603	-	T	chr10:77322603	Adarb1	.	Intron	missense_variant	1	1	-	-	-	-	4.98289	0.0316	<0.001	0.5	|	1.01924	0.00479	0.00237	0.36	|	0	1	0	1	1	1	0	1	0	0	2	0	---	---	---	---	---	---	---	---	---	0	0	---	---
chr10	77322607	-	T	chr10:77322607	Adarb1	.	Intron	missense_variant	0	0	-	-	-	-	0	0.0316	0.0316	1	|	-0.182726	0.682	0.774	0.374	|	0	1	0	1	1	1	1	1	1	0	2	0	---	---	---	---	---	---	---	---	---	0	0	---	---
chr10	77322608	-	T	chr10:77322608	Adarb1	.	Intron	synonymous_variant	1	1	-	-	-	-	4.98289	0.0316	<0.001	0.5	|	-0.115537	0.156	0.169	0.806	|	0	1	0	0	1	0	0	1	0	2	2	1	---	---	---	---	---	---	---	---	---	0	0	---	---
chr10	77322621	-	T	chr10:77322621	Adarb1	.	Intron	missense_variant	1	1	-	-	-	-	4.98289	1	0.0316	0.5	|	0.350276	0.304	0.238	0.603	|	0	1	0	1	1	1	1	1	1	2	2	1	---	---	---	---	---	---	---	---	---	0	0	---	---
chr10	77322631	-	T	chr10:77322631	Adarb1	.	Intron	splice_acceptor_variant	1	1	-	-	-	-	0	<0.001	<0.001	---	|	3.07881	0.0573	0.00678	0.223	|	---	---	---	0	1	0	0	1	0	0	2	0	---	---	---	---	---	---	---	---	---	0	0	---	---
chr10	77322658	-	T	chr10:77322658	Adarb1	.	Intron	non_coding_transcript_variant	0	0	-	-	-	-	0	<0.001	<0.001	---	|	-1.34357	<0.001	0.00254	0.374	|	---	---	---	0	1	0	0	2	0	0	2	0	---	---	---	---	---	---	---	---	---	0	0	---	---
chr10	77322659	-	T	chr10:77322659	Adarb1	.	Intron	non_coding_transcript_variant	0	0	-	-	-	-	-9.96578	<0.001	1	---	|	0	<0.001	<0.001	---	|	---	---	---	1	1	1	2	2	1	0	2	0	---	---	---	---	---	---	---	---	---	0	0	---	---
chr10	77645099	+	A	chr10:77645099	Mir1930,Sumo3,Ube2g2	.	UTR	3_prime_UTR_variant	0	0	-	-	-	-	-0.61205	0.00139	0.00212	0.565	|	3.28956	0.0232	0.00238	0.0288	|	3	142	0.0211268	0	44	0	0	123	0	0	59	0	1	232	0.00431034	0	90	0	0	224	0	1	140	0.00714286	0
chr10	78439945	-	T	chr10:78439945	AC160411.2,Pdxk	SINE	UTR	regulatory_region_variant	0	0	-	-	-	-	-1.38138	<0.001	0.00261	0.374	|	-0.534415	0.0112	0.0163	0.412	|	0	30	0	0	1	0	0	23	0	0	2	0	0	39	0	---	---	---	3	25	0.12	0	5	0	0
chr10	78439946	-	T	chr10:78439946	AC160411.2,Pdxk	SINE	UTR	regulatory_region_variant	0	0	-	-	-	-	-1.38138	<0.001	0.00261	0.374	|	0.981142	0.0109	0.00554	0.615	|	0	30	0	0	1	0	0	23	0	0	2	0	0	39	0	---	---	---	3	25	0.12	0	5	0	0
chr10	78439947	-	T	chr10:78439947	AC160411.2,Pdxk	SINE	UTR	regulatory_region_variant	0	0	-	-	-	-	-1.39316	<0.001	0.00263	0.374	|	1.05122	0.0397	0.0191	0.14	|	0	30	0	0	1	0	0	22	0	0	2	0	0	39	0	---	---	---	3	24	0.125	0	5	0	0
chr10	79674560	+	A	chr10:79674560	Tpgs1	SINE	Intron	non_coding_transcript_variant	0	0	79675241	681	downstream	intronic	1.97579	0.00393	<0.001	0.175	|	6.2566	0.167	0.00219	0.00473	|	0	11	0	1	18	0.0555556	0	4	0	1	15	0.0666667	0	13	0	0	17	0	0	9	0	0	4	0	0
chr10	79674567	+	A	chr10:79674567	Tpgs1	SINE	Intron	non_coding_transcript_variant	0	0	79675234	667	downstream	intronic	0	<0.001	<0.001	---	|	5.31781	0.0872	0.00219	0.0104	|	0	10	0	0	17	0	0	6	0	0	14	0	0	8	0	0	18	0	0	9	0	0	4	0	0
chr10	79674573	+	A	chr10:79674573	Tpgs1	SINE	Intron	non_coding_transcript_variant	0	0	79675228	655	downstream	intronic	3.45374	0.011	<0.001	0.0804	|	5.49809	0.257	0.00569	0.024	|	0	12	0	5	17	0.294118	0	6	0	2	17	0.117647	0	8	0	1	20	0.05	0	9	0	0	4	0	0
chr10	79674574	+	A	chr10:79674574	Tpgs1	SINE	Intron	non_coding_transcript_variant	0	0	79675223	649	downstream	intronic	3.28707	0.00976	<0.001	0.0821	|	6.15092	0.154	0.00217	0.00294	|	0	13	0	5	17	0.294118	0	6	0	1	17	0.0588235	0	8	0	1	20	0.05	0	9	0	0	4	0	0
chr10	79674586	+	A	chr10:79674586	Tpgs1	SINE	Intron	non_coding_transcript_variant	0	0	79675215	629	downstream	intronic	1.90595	0.00375	<0.001	0.175	|	7.53215	0.185	<0.001	3.09e-05	|	0	11	0	1	19	0.0526316	0	6	0	1	19	0.0526316	0	12	0	0	15	0	0	9	0	0	4	0	0
chr10	79674601	+	A	chr10:79674601	Tpgs1	SINE	Intron	non_coding_transcript_variant	1	1	79674815	214	downstream	intronic	2.70607	0.0167	0.00257	0.367	|	1.83015	0.845	0.238	0.00912	|	0	8	0	10	24	0.416667	0	8	0	9	20	0.45	0	15	0	2	17	0.117647	2	7	0.285714	0	5	0	0
chr10	79686216	+	A	chr10:79686216	Cdc34,Gzmm	SINE	Intron	regulatory_region_variant	1	1	-	-	-	-	1.07601	0.00211	<0.001	0.186	|	5.77286	0.165	0.00302	0.0298	|	0	8	0	1	170	0.00588235	0	7	0	0	91	0	0	6	0	2	134	0.0149254	0	14	0	0	50	0	0
chr10	79818716	+	A	chr10:79818716	Misp,Palm	.	Intron	intron_variant	1	1	-	-	-	-	0	<0.001	<0.001	---	|	0.285281	0.0203	0.0166	0.216	|	0	50	0	0	16	0	0	57	0	0	14	0	0	33	0	0	7	0	0	22	0	0	12	0	0
chr10	79818847	+	A	chr10:79818847	Misp,Palm	SINE	Intron	intron_variant	1	1	-	-	-	-	0	<0.001	<0.001	---	|	1.58109	0.202	0.0674	0.35	|	0	26	0	0	9	0	0	14	0	0	3	0	0	27	0	0	1	0	0	20	0	0	4	0	0
chr10	79818869	+	A	chr10:79818869	Misp,Palm	SINE	Intron	intron_variant	1	1	-	-	-	-	0	<0.001	<0.001	---	|	-1.36329	0.00684	0.0176	0.711	|	0	26	0	0	8	0	0	16	0	0	2	0	0	26	0	0	4	0	0	30	0	0	8	0	0
chr10	79818908	+	A	chr10:79818908	Misp,Palm	SINE	Intron	intron_variant	1	1	-	-	-	-	0	<0.001	<0.001	---	|	0.143804	0.211	0.191	0.864	|	0	24	0	0	8	0	0	15	0	0	3	0	0	34	0	0	7	0	0	31	0	0	12	0	0
chr10	79868397	-	T	chr10:79868397	Gm17134,Plppr3,Ptbp1	SINE	Intron	non_coding_transcript_variant	0	0	79868185	212	downstream	intronic	1.66096	0.00316	<0.001	0.363	|	3.80303	0.451	0.0323	0.142	|	0	0	---	0	1	0	0	0	---	0	0	---	0	0	---	0	2	0	0	0	---	4	4	1	0
chr10	79870286	-	T	chr10:79870286	Plppr3,Prtn3	SINE	Intron	non_coding_transcript_variant	0	0	79868232	2054	downstream	intronic	0	<0.001	<0.001	---	|	3.93589	0.0402	0.00263	0.0674	|	0	0	---	0	8	0	0	1	0	0	0	---	0	1	0	0	3	0	0	0	---	0	0	---	0
chr10	80022775	+	A	chr10:80022775	Arhgap45	SINE	Intron	non_coding_transcript_variant	0	0	80024107	1332	downstream	intronic	2.14728	0.00778	0.00176	0.0802	|	3.98631	0.0158	<0.001	0.178	|	2	68	0.0294118	9	311	0.0289389	0	52	0	2	148	0.0135135	0	70	0	3	182	0.0164835	0	29	0	1	29	0.0344828	0
chr10	80024099	+	A	chr10:80024099	Arhgap45	SINE	Intron	non_coding_transcript_variant	0	0	80022783	1316	upstream	intronic	2.73083	0.0111	0.00167	0.0518	|	1.99316	0.00398	<0.001	0.374	|	2	91	0.021978	35	498	0.0702811	0	85	0	8	183	0.0437158	0	87	0	16	242	0.0661157	0	65	0	1	108	0.00925926	0
chr10	80024172	+	A	chr10:80024172	Arhgap45	SINE	Intron	non_coding_transcript_variant	0	0	80022713	1459	upstream	intronic	3.91237	0.0151	<0.001	0.00661	|	0	<0.001	<0.001	---	|	0	119	0	19	596	0.0318792	0	95	0	11	252	0.0436508	0	130	0	15	276	0.0543478	0	66	0	2	110	0.0181818	0
chr10	80123160	+	A	chr10:80123160	Stk11	SINE	Intron	NMD_transcript_variant	1	1	-	-	-	-	2.6431	0.00625	<0.001	0.0802	|	0.9673	0.00625	0.0032	0.745	|	0	35	0	5	90	0.0555556	0	26	0	0	34	0	0	25	0	1	55	0.0181818	0	11	0	0	10	0	0
chr10	80281018	+	A	chr10:80281018	Dazap1,Gm15122,Mir6911	.	Intron	splice_region_variant	0	0	-	-	-	-	-3.28443	0.0376	0.366	0.125	|	-0.483996	0.141	0.197	0.329	|	10	42	0.238095	6	34	0.176471	11	50	0.22	6	30	0.2	14	47	0.297872	5	37	0.135135	16	24	0.666667	10	17	0.588235	9
chr10	80567359	-	T	chr10:80567359	Klf16	.	UTR	regulatory_region_variant	0	0	80566157	1202	downstream	undefined	-1.32287	<0.001	0.0025	0.18	|	3.2835	0.11	0.0113	0.0302	|	1	96	0.0104167	0	49	0	0	131	0	0	26	0	0	162	0	0	39	0	0	106	0	0	51	0	0
chr10	80685972	-	T	chr10:80685972	Gm26541,Mob3a	SINE	UTR	3_prime_UTR_variant	0	0	-	-	-	-	-1.46544	0.00309	0.00852	0.231	|	0.0747098	0.00531	0.00505	0.916	|	12	745	0.0161074	3	304	0.00986842	7	582	0.0120275	0	279	0	6	722	0.00831025	3	424	0.00707547	19	935	0.0203209	0	439	0	1
chr10	80685976	-	T	chr10:80685976	Gm26541,Mob3a	SINE	UTR	3_prime_UTR_variant	0	0	-	-	-	-	-1.09735	0.0402	0.0861	0.0166	|	0.751597	0.115	0.0685	0.024	|	51	749	0.0680908	15	301	0.0498339	68	592	0.114865	13	271	0.0479705	75	730	0.10274	17	433	0.039261	113	990	0.114141	43	473	0.0909091	31
chr10	80685987	-	T	chr10:80685987	Gm26541,Mob3a	SINE	UTR	3_prime_UTR_variant	0	0	-	-	-	-	-2.03198	0.00724	0.0296	0.0561	|	2.06844	0.0475	0.0113	0.0862	|	11	771	0.0142672	5	318	0.0157233	19	619	0.0306947	1	290	0.00344828	34	757	0.0449141	9	446	0.0201794	47	1066	0.0440901	7	523	0.0133843	28
chr10	80686435	-	T	chr10:80686435	Gm26541,Mob3a	SINE	UTR	3_prime_UTR_variant	1	1	-	-	-	-	-1.0289	0.0304	0.062	0.00889	|	0.7344	0.0696	0.0419	0.402	|	28	560	0.05	7	203	0.0344828	23	464	0.049569	8	181	0.0441989	50	543	0.092081	10	229	0.0436681	14	416	0.0336538	2	154	0.012987	20
chr10	80686445	-	T	chr10:80686445	Gm26541,Mob3a	SINE	UTR	3_prime_UTR_variant	0	0	-	-	-	-	-1.76114	0.0019	0.00643	0.0919	|	-0.735729	0.00148	0.00247	0.566	|	9	530	0.0169811	0	203	0	2	449	0.00445434	2	190	0.0105263	8	532	0.0150376	1	225	0.00444444	2	411	0.00486618	0	138	0	0
chr10	80686484	-	T	chr10:80686484	Gm26541,Mob3a	SINE	UTR	3_prime_UTR_variant	0	0	-	-	-	-	-0.643622	0.00141	0.0022	0.51	|	-0.00466486	0.0282	0.0283	0.998	|	4	541	0.00739372	0	209	0	0	469	0	0	199	0	1	523	0.00191205	0	208	0	0	357	0	1	127	0.00787402	2
chr10	80704922	+	A	chr10:80704922	Ap3d1,Izumo4,Mob3a	SINE	Intron	non_coding_transcript_exon_variant	0	0	-	-	-	-	0	<0.001	<0.001	---	|	-1.44218	<0.001	0.00272	0.374	|	0	56	0	0	7	0	0	57	0	0	11	0	0	69	0	0	17	0	0	93	0	0	18	0	0
chr10	80949087	-	T	chr10:80949087	Gng7	SINE	UTR	regulatory_region_variant	0	0	80950361	1274	upstream	UTR	-1.94055	<0.001	0.00384	0.374	|	1.57933	0.0313	0.0105	0.207	|	0	7	0	0	0	---	0	5	0	---	---	---	0	3	0	0	0	---	0	13	0	0	11	0	0
chr10	80949113	-	T	chr10:80949113	Gng7	SINE	UTR	regulatory_region_variant	0	0	-	-	-	-	-1.94055	<0.001	0.00384	0.374	|	-0.271374	0.019	0.0229	0.861	|	0	4	0	0	0	---	0	3	0	---	---	---	0	2	0	0	0	---	0	10	0	0	7	0	0
chr10	80949114	-	T	chr10:80949114	Gng7	SINE	UTR	regulatory_region_variant	0	0	-	-	-	-	-1.94055	<0.001	0.00384	0.374	|	0.585904	0.018	0.012	0.614	|	0	4	0	0	0	---	0	4	0	---	---	---	0	2	0	0	0	---	0	11	0	0	7	0	0
chr10	81029931	-	T	chr10:81029931	Diras1,Gm16099,Slc39a3	.	UTR	3_prime_UTR_variant	0	0	-	-	-	-	-0.951266	<0.001	0.00193	0.374	|	-1.10134	0.00934	0.02	0.604	|	1	37	0.027027	0	2	0	0	39	0	---	---	---	0	34	0	0	4	0	0	21	0	0	17	0	0
chr10	81030439	-	T	chr10:81030439	Diras1,Gm16099,Slc39a3	.	UTR	3_prime_UTR_variant	1	1	-	-	-	-	0	<0.001	<0.001	---	|	0.366121	0.103	0.0797	0.585	|	0	36	0	0	4	0	0	21	0	0	3	0	0	34	0	0	3	0	0	21	0	0	6	0	0
chr10	81030512	-	T	chr10:81030512	Diras1,Gm16099,Slc39a3	.	UTR	3_prime_UTR_variant	0	0	-	-	-	-	0	<0.001	<0.001	---	|	-0.159138	0.0254	0.0283	0.901	|	0	42	0	0	3	0	0	28	0	0	3	0	0	39	0	0	4	0	0	27	0	0	2	0	0
chr10	81030680	-	T	chr10:81030680	Gm16099,Slc39a3	.	UTR	3_prime_UTR_variant	0	0	-	-	-	-	0	<0.001	<0.001	---	|	2.72197	0.0179	0.00272	0.0807	|	0	47	0	0	6	0	0	45	0	0	1	0	0	60	0	0	1	0	0	22	0	0	7	0	0
chr10	81076649	+	A	chr10:81076649	Thop1	SINE	Intron	non_coding_transcript_variant	0	0	-	-	-	-	0	<0.001	<0.001	---	|	2.67752	0.0455	0.00711	0.402	|	0	2	0	0	2	0	0	3	0	0	0	---	0	0	---	0	0	---	0	0	---	0	0	---	0
chr10	81220202	-	T	chr10:81220202	Atcay	SINE	Intron	NMD_transcript_variant	0	0	-	-	-	-	0	<0.001	<0.001	---	|	3.7393	0.0687	0.00514	0.0698	|	0	0	---	---	---	---	0	0	---	0	0	---	0	0	---	0	0	---	0	3	0	0	0	---	0
chr10	81220928	-	T	chr10:81220928	Atcay	SINE	Intron	regulatory_region_variant	0	0	-	-	-	-	0	<0.001	<0.001	---	|	4.65892	0.144	0.00569	0.0342	|	0	0	---	---	---	---	0	0	---	0	0	---	0	0	---	0	0	---	0	0	---	0	0	---	0
chr10	81346145	-	T	chr10:81346145	Gipc3,Hmg20b	.	UTR	3_prime_UTR_variant	0	0	-	-	-	-	-0.852326	0.00486	0.00878	0.692	|	-1.59904	0.00679	0.0206	0.286	|	1	73	0.0136986	0	38	0	0	68	0	1	36	0.0277778	0	96	0	3	46	0.0652174	8	315	0.0253968	0	162	0	15
chr10	81346249	-	T	chr10:81346249	Gipc3,Hmg20b	.	UTR	3_prime_UTR_variant	1	1	-	-	-	-	-0.150094	0.00407	0.00452	0.93	|	1.66342	0.0166	0.00524	0.412	|	5	174	0.0287356	0	64	0	0	190	0	3	58	0.0517241	0	199	0	1	88	0.0113636	8	564	0.0141844	2	258	0.00775194	2
chr10	81718936	+	A	chr10:81718936	AC167202.2,AC167202.3,Zfp433	Unknown	Exon	synonymous_variant	0	0	-	-	-	-	-5.00591	<0.001	0.0321	0.0265	|	-1.28844	<0.001	0.00244	0.374	|	11	42	0.261905	0	2	0	5	20	0.25	0	7	0	8	34	0.235294	0	10	0	1	14	0.0714286	0	1	0	0
chr10	82650779	-	T	chr10:82650779	Glt8d2,Tdg	SINE	UTR	3_prime_UTR_variant	1	1	-	-	-	-	0	<0.001	<0.001	---	|	-0.625634	0.0864	0.133	0.773	|	0	1	0	---	---	---	0	2	0	---	---	---	---	---	---	---	---	---	0	9	0	0	7	0	---
chr10	82650781	+	A	chr10:82650781	Glt8d2,Tdg	SINE	UTR	3_prime_UTR_variant	0	0	82650556	225	upstream	UTR	0	<0.001	<0.001	---	|	-2.42939	<0.001	0.00539	0.18	|	0	1	0	---	---	---	0	2	0	---	---	---	---	---	---	---	---	---	0	9	0	0	7	0	---
chr10	83193092	+	A	chr10:83193092	Chst11	.	UTR	3_prime_UTR_variant	0	0	-	-	-	-	-3.84461	0.00236	0.0339	0.0706	|	-1.31239	0.00176	0.00436	0.259	|	6	99	0.0606061	0	47	0	6	82	0.0731707	0	20	0	7	93	0.0752688	4	55	0.0727273	4	30	0.133333	0	20	0	0
chr10	83194710	+	A	chr10:83194710	Chst11	.	UTR	3_prime_UTR_variant	0	0	-	-	-	-	-3.46185	<0.001	0.011	0.033	|	-0.323477	0.00179	0.00224	0.85	|	1	64	0.015625	0	25	0	1	65	0.0153846	0	25	0	0	94	0	0	35	0	3	31	0.0967742	0	17	0	1
chr10	83611553	-	T	chr10:83611553	Appl2	.	Intron	non_coding_transcript_exon_variant	0	0	83611885	332	upstream	intronic	0	<0.001	<0.001	---	|	0.981754	0.044	0.0223	0.672	|	0	19	0	0	0	---	0	18	0	0	0	---	0	24	0	---	---	---	0	15	0	---	---	---	0
chr10	85115671	+	A	chr10:85115671	Mterf2,Tmem263	SINE	UTR	3_prime_UTR_variant	0	0	-	-	-	-	1.37147	0.00259	<0.001	0.363	|	2.35401	0.049	0.00958	0.112	|	0	38	0	0	16	0	0	27	0	0	16	0	0	53	0	0	31	0	0	30	0	0	32	0	0
chr10	86053158	-	T	chr10:86053158	Fbxo7,Syn3	.	intergenic	downstream_gene_variant	0	0	-	-	-	-	0	<0.001	<0.001	---	|	1.51312	0.0588	0.0206	0.103	|	---	---	---	0	7	0	---	---	---	---	---	---	---	---	---	0	2	0	---	---	---	---	---	---	---
chr10	86836294	+	A	chr10:86836294	AC152453.1,Gm16268,Nt5dc3,Stab2	SINE	UTR	3_prime_UTR_variant	0	0	-	-	-	-	1.06347	0.00209	<0.001	0.363	|	-0.097967	0.00621	0.00665	0.956	|	0	5	0	0	4	0	0	7	0	0	6	0	0	21	0	0	6	0	0	16	0	0	14	0	0
chr10	86836295	+	A	chr10:86836295	AC152453.1,Gm16268,Nt5dc3,Stab2	SINE	UTR	3_prime_UTR_variant	0	0	-	-	-	-	3.08236	0.0213	0.00251	0.151	|	0.678673	0.242	0.151	0.0823	|	0	4	0	0	4	0	0	7	0	0	6	0	0	21	0	0	6	0	4	16	0.25	6	13	0.461538	0
chr10	86836300	+	A	chr10:86836300	AC152453.1,Gm16268,Nt5dc3,Stab2	SINE	UTR	3_prime_UTR_variant	0	0	-	-	-	-	1.3968	0.00263	<0.001	0.363	|	0.622253	0.0403	0.0262	0.122	|	0	4	0	0	4	0	0	8	0	0	5	0	0	21	0	0	6	0	0	15	0	0	17	0	0
chr10	86836320	+	A	chr10:86836320	AC152453.1,Gm16268,Nt5dc3,Stab2	SINE	UTR	3_prime_UTR_variant	0	0	86837302	982	downstream	UTR	0	<0.001	<0.001	---	|	1.22179	0.0631	0.0271	0.0209	|	0	5	0	0	6	0	0	11	0	0	5	0	0	20	0	0	6	0	0	13	0	0	16	0	0
chr10	86836339	+	A	chr10:86836339	AC152453.1,Gm16268,Nt5dc3,Stab2	SINE	UTR	3_prime_UTR_variant	1	1	86835262	1077	upstream	UTR	1.44064	0.00271	<0.001	0.363	|	0.384461	0.0872	0.0668	0.397	|	0	10	0	0	5	0	0	10	0	2	5	0.4	0	25	0	0	4	0	0	20	0	0	16	0	0
chr10	86836344	+	A	chr10:86836344	AC152453.1,Gm16268,Nt5dc3,Stab2	SINE	UTR	3_prime_UTR_variant	0	0	86835261	1083	upstream	UTR	2.18737	0.00455	<0.001	0.176	|	0.59893	0.164	0.109	0.119	|	0	10	0	0	5	0	0	10	0	1	8	0.125	0	25	0	0	4	0	0	19	0	1	14	0.0714286	0
chr10	86836354	+	A	chr10:86836354	AC152453.1,Gm16268,Nt5dc3,Stab2	SINE	UTR	3_prime_UTR_variant	1	1	-	-	-	-	1.2445	0.00444	0.00188	0.533	|	0.457327	0.0331	0.0241	0.393	|	0	11	0	0	7	0	0	9	0	1	10	0.1	1	23	0.0434783	0	5	0	0	17	0	1	13	0.0769231	0
chr10	86836357	+	A	chr10:86836357	AC152453.1,Gm16268,Nt5dc3,Stab2	SINE	UTR	3_prime_UTR_variant	0	0	-	-	-	-	-2.68798	0.00235	0.0151	0.342	|	0.398977	0.142	0.108	0.458	|	0	11	0	1	6	0.166667	2	9	0.222222	0	10	0	3	23	0.130435	0	5	0	7	17	0.411765	0	13	0	0
chr10	86836358	+	A	chr10:86836358	AC152453.1,Gm16268,Nt5dc3,Stab2	SINE	UTR	3_prime_UTR_variant	1	1	-	-	-	-	-2.57042	0.00242	0.0144	0.171	|	1.58428	0.113	0.0377	0.0205	|	2	11	0.181818	0	6	0	2	9	0.222222	0	10	0	5	23	0.217391	1	5	0.2	0	17	0	0	13	0	0
chr10	86836368	+	A	chr10:86836368	AC152453.1,Gm16268,Nt5dc3,Stab2	SINE	UTR	3_prime_UTR_variant	0	0	-	-	-	-	-1.27398	<0.001	0.00242	0.363	|	0.549065	0.0801	0.0547	0.225	|	0	11	0	0	6	0	2	10	0.2	0	10	0	0	25	0	0	6	0	0	15	0	0	15	0	0
chr10	86837227	+	A	chr10:86837227	AC152453.1,Gm16268,Nt5dc3,Stab2	SINE	UTR	regulatory_region_variant	1	1	-	-	-	-	0	<0.001	<0.001	---	|	1.54765	0.0589	0.0201	0.0679	|	0	30	0	0	13	0	0	12	0	0	10	0	0	21	0	0	7	0	0	58	0	0	50	0	0
chr10	86837235	+	A	chr10:86837235	AC152453.1,Gm16268,Nt5dc3,Stab2	SINE	UTR	regulatory_region_variant	1	1	86836387	848	upstream	UTR	-0.70515	0.00206	0.00336	0.455	|	-0.737253	0.00302	0.00504	0.522	|	1	31	0.0322581	0	15	0	0	15	0	0	11	0	0	21	0	0	10	0	3	67	0.0447761	3	39	0.0769231	0
chr10	86837257	+	A	chr10:86837257	AC152453.1,Gm16268,Nt5dc3,Stab2	SINE	UTR	regulatory_region_variant	1	1	-	-	-	-	-2.37634	0.0574	0.298	0.202	|	0.0703457	0.923	0.879	0.114	|	5	31	0.16129	0	10	0	2	11	0.181818	4	14	0.285714	4	21	0.190476	0	11	0	17	72	0.236111	17	46	0.369565	8
chr10	86837259	+	A	chr10:86837259	AC152453.1,Gm16268,Nt5dc3,Stab2	SINE	UTR	regulatory_region_variant	0	0	-	-	-	-	2.20635	0.00462	<0.001	0.175	|	0.281803	0.0607	0.05	0.508	|	0	31	0	0	10	0	0	12	0	0	14	0	0	22	0	0	12	0	0	71	0	4	46	0.0869565	0
chr10	86837260	+	A	chr10:86837260	AC152453.1,Gm16268,Nt5dc3,Stab2	SINE	UTR	regulatory_region_variant	1	1	-	-	-	-	-3.39195	0.0167	0.175	0.0858	|	0.258372	0.65	0.543	0.0962	|	3	31	0.0967742	0	10	0	2	12	0.166667	0	14	0	2	22	0.0909091	0	12	0	7	76	0.0921053	9	46	0.195652	4
chr10	86837264	+	A	chr10:86837264	AC152453.1,Gm16268,Nt5dc3,Stab2	SINE	UTR	regulatory_region_variant	1	1	-	-	-	-	0	<0.001	<0.001	---	|	1.03291	0.00499	0.00244	0.308	|	0	31	0	0	10	0	0	12	0	0	14	0	0	24	0	0	12	0	0	70	0	0	51	0	0
chr10	86837267	+	A	chr10:86837267	AC152453.1,Gm16268,Nt5dc3,Stab2	SINE	UTR	regulatory_region_variant	1	1	-	-	-	-	-1.33648	0.00205	0.00518	0.348	|	0.872771	0.233	0.127	0.00387	|	1	31	0.0322581	0	13	0	0	14	0	0	15	0	1	23	0.0434783	0	12	0	1	73	0.0136986	4	54	0.0740741	0
chr10	86837287	+	A	chr10:86837287	AC152453.1,Gm16268,Nt5dc3,Stab2	SINE	UTR	3_prime_UTR_variant	0	0	-	-	-	-	1.21132	0.0047	0.00203	0.298	|	0.662939	0.217	0.137	0.154	|	0	29	0	0	16	0	0	16	0	0	14	0	0	26	0	0	12	0	0	81	0	4	48	0.0833333	0
chr10	86837288	+	A	chr10:86837288	AC152453.1,Gm16268,Nt5dc3,Stab2	SINE	UTR	3_prime_UTR_variant	1	1	-	-	-	-	-1.06347	<0.001	0.00209	0.363	|	0.240016	0.0284	0.0241	0.719	|	0	28	0	0	16	0	0	16	0	0	14	0	0	26	0	0	12	0	0	82	0	0	47	0	3
chr10	86837289	+	A	chr10:86837289	AC152453.1,Gm16268,Nt5dc3,Stab2	SINE	UTR	3_prime_UTR_variant	0	0	86836334	955	upstream	UTR	0	<0.001	<0.001	---	|	-0.379556	0.0109	0.0141	0.766	|	0	28	0	0	16	0	0	16	0	0	14	0	0	26	0	0	12	0	0	81	0	0	48	0	0
chr10	86837334	+	A	chr10:86837334	AC152453.1,Gm16268,Nt5dc3,Stab2	SINE	UTR	3_prime_UTR_variant	1	1	-	-	-	-	-0.685933	0.00224	0.0036	0.738	|	-0.18354	0.0234	0.0266	0.746	|	0	29	0	2	16	0.125	0	19	0	0	14	0	0	22	0	0	13	0	1	71	0.0140845	0	46	0	0
chr10	87931707	+	A	chr10:87931707	Igf1	.	UTR	3_prime_UTR_variant	1	1	-	-	-	-	0	<0.001	<0.001	---	|	-0.279415	0.0725	0.0879	0.667	|	1	1	1	---	---	---	---	---	---	---	---	---	0	7	0	0	2	0	1	3	0.333333	---	---	---	---
chr10	88470159	-	T	chr10:88470159	Chpt1,Sycp3	.	UTR	3_prime_UTR_variant	0	0	88470462	303	upstream	UTR	-8.96578	<0.001	0.5	---	|	0.450169	0.0253	0.0185	0.865	|	0	1	0	---	---	---	1	2	0.5	0	2	0	0	8	0	---	---	---	5	9	0.555556	---	---	---	2
chr10	88470160	-	T	chr10:88470160	Chpt1,Sycp3	.	UTR	3_prime_UTR_variant	0	0	88470461	301	upstream	UTR	-8.96578	<0.001	0.5	---	|	4.5185	0.186	0.00812	0.0533	|	0	1	0	---	---	---	1	2	0.5	0	2	0	0	8	0	---	---	---	5	9	0.555556	---	---	---	2
chr10	88470163	-	T	chr10:88470163	Chpt1,Sycp3	.	UTR	3_prime_UTR_variant	0	0	88470460	297	upstream	UTR	0	<0.001	<0.001	---	|	1.63244	0.0192	0.00619	0.296	|	0	1	0	---	---	---	0	2	0	0	2	0	1	8	0.125	---	---	---	0	9	0	---	---	---	0
chr10	88470177	-	T	chr10:88470177	Chpt1,Sycp3	.	UTR	3_prime_UTR_variant	1	1	-	-	-	-	-8.96578	<0.001	0.5	---	|	1.33601	0.199	0.0788	0.504	|	0	3	0	---	---	---	1	2	0.5	0	2	0	3	7	0.428571	---	---	---	0	10	0	---	---	---	2
chr10	88470180	-	T	chr10:88470180	Chpt1,Sycp3	.	UTR	3_prime_UTR_variant	0	0	-	-	-	-	-9.46578	<0.001	0.707	0.0336	|	-1.13758	0.0676	0.149	0.549	|	0	3	0	---	---	---	2	2	1	0	2	0	0	7	0	---	---	---	7	10	0.7	---	---	---	2
chr10	89653333	-	T	chr10:89653333	Scyl2	SINE	Intron	non_coding_transcript_variant	0	0	89653831	498	upstream	intronic	6.87671	0.118	<0.001	0.00442	|	3.10338	0.0226	0.00263	0.105	|	0	21	0	10	35	0.285714	0	7	0	8	30	0.266667	0	6	0	7	45	0.155556	0	8	0	10	27	0.37037	0
chr10	89653653	-	T	chr10:89653653	Scyl2	SINE	Intron	non_coding_transcript_variant	0	0	-	-	-	-	4.53027	0.0231	<0.001	0.00486	|	0.847573	0.0018	<0.001	0.374	|	0	9	0	3	88	0.0340909	0	9	0	1	46	0.0217391	0	13	0	5	86	0.0581395	0	5	0	5	111	0.045045	0
chr10	90990709	-	T	chr10:90990709	Apaf1	SINE	UTR	regulatory_region_variant	1	1	-	-	-	-	-0.805576	<0.001	0.00175	0.182	|	-1.31279	0.015	0.0373	0.132	|	0	211	0	0	25	0	0	177	0	0	22	0	1	247	0.00404858	0	29	0	1	142	0.00704225	0	14	0	0
chr10	91097742	+	A	chr10:91097742	Ikbip	SINE	UTR	3_prime_UTR_variant	0	0	91098456	714	downstream	UTR	-3.50283	<0.001	0.0113	0.0774	|	-2.25915	0.0187	0.0896	0.0901	|	0	14	0	0	0	---	2	13	0.153846	0	0	---	3	15	0.2	0	0	---	2	29	0.0689655	0	7	0	0
chr10	91098466	+	A	chr10:91098466	Ikbip	SINE	UTR	3_prime_UTR_variant	0	0	-	-	-	-	1.66096	0.00316	<0.001	0.363	|	-1.6224	0.00769	0.0237	0.537	|	0	14	0	0	0	---	0	9	0	0	0	---	0	8	0	0	2	0	0	29	0	0	4	0	0
chr10	93964580	-	T	chr10:93964580	Mir331,Vezt	SINE	UTR	3_prime_UTR_variant	0	0	-	-	-	-	3.07627	0.00843	<0.001	0.423	|	-0.103536	0.317	0.34	0.78	|	0	0	---	0	0	---	0	1	0	---	---	---	1	1	1	---	---	---	0	0	---	0	0	---	0
chr10	93964622	-	T	chr10:93964622	Mir331,Vezt	SINE	UTR	3_prime_UTR_variant	1	1	-	-	-	-	-3.32193	<0.001	0.01	0.423	|	3.12193	0.00871	<0.001	0.179	|	0	0	---	0	1	0	0	1	0	---	---	---	0	1	0	---	---	---	0	0	---	0	0	---	---
chr10	93966064	-	T	chr10:93966064	Mir331,Vezt	SINE	UTR	regulatory_region_variant	1	1	93964563	1501	downstream	UTR	4.98289	0.0316	<0.001	0.5	|	-2.75862	0.0323	0.218	0.247	|	0	2	0	0	0	---	1	1	1	---	---	---	0	0	---	---	---	---	0	0	---	4	4	1	---
chr10	94221351	+	A	chr10:94221351	Ndufa12	SINE	UTR	3_prime_UTR_variant	0	0	94222262	911	downstream	undefined	0	<0.001	<0.001	---	|	-0.553425	0.0165	0.0242	0.741	|	0	1	0	---	---	---	---	---	---	---	---	---	0	0	---	---	---	---	0	3	0	0	9	0	0
chr10	94221362	+	A	chr10:94221362	Ndufa12	SINE	UTR	3_prime_UTR_variant	1	1	94222251	889	downstream	undefined	3.07627	0.00843	<0.001	0.423	|	-1.02667	0.0838	0.171	0.581	|	0	1	0	---	---	---	---	---	---	---	---	---	0	0	---	---	---	---	0	3	0	6	10	0.6	0
chr10	94221372	+	A	chr10:94221372	Ndufa12	SINE	UTR	3_prime_UTR_variant	1	1	94222242	870	downstream	undefined	0	<0.001	<0.001	---	|	-1.79219	0.00552	0.0191	0.55	|	0	1	0	---	---	---	---	---	---	---	---	---	0	0	---	---	---	---	0	3	0	0	10	0	0
chr10	94721432	+	A	chr10:94721432	Cep83	SINE	Intron	non_coding_transcript_exon_variant	0	0	-	-	-	-	-1.06347	<0.001	0.00209	0.363	|	-3.79274	0.00344	0.0476	0.00497	|	2	24	0.0833333	0	18	0	0	18	0	0	22	0	0	44	0	0	25	0	0	36	0	0	4	0	0
chr10	94721434	+	A	chr10:94721434	Cep83	SINE	Intron	non_coding_transcript_exon_variant	0	0	-	-	-	-	0	<0.001	<0.001	---	|	-2.90842	0.00225	0.0169	0.27	|	0	24	0	0	19	0	0	19	0	0	23	0	0	45	0	0	24	0	0	36	0	0	4	0	0
chr10	99446329	+	A	chr10:99446329	Gad1-ps	.	intergenic	downstream_gene_variant	0	0	-	-	-	-	-0.372854	0.00242	0.00313	0.717	|	---	---	---	---	|	0	245	0	0	143	0	0	142	0	1	118	0.00847458	3	149	0.0201342	0	164	0	0	85	0	0	70	0	0
chr10	111296779	+	A	chr10:111296779	Bbs10,Osbpl8	SINE	UTR	3_prime_UTR_variant	0	0	-	-	-	-	-0.285366	0.00206	0.00251	0.841	|	2.4737	0.0208	0.00375	0.227	|	0	204	0	0	153	0	2	136	0.0147059	0	157	0	4	235	0.0170213	0	127	0	0	314	0	0	260	0	0
chr10	117278922	-	T	chr10:117278922	Lyz2	.	Intron	intron_variant	0	0	117279654	732	upstream	intronic	2.81636	0.0183	0.0026	0.0152	|	-2.57149	0.00347	0.0206	0.218	|	7	1599	0.00437774	42	1393	0.0301508	3	1135	0.00264317	25	738	0.0338753	4	1537	0.00260247	39	1131	0.0344828	0	580	0	16	444	0.036036	1
chr10	117707471	-	T	chr10:117707471	Mdm2	SINE	Intron	non_coding_transcript_variant	0	0	-	-	-	-	2.70135	0.0065	<0.001	0.0762	|	0.487786	0.207	0.147	0.527	|	0	43	0	6	118	0.0508475	0	30	0	3	65	0.0461538	0	45	0	3	93	0.0322581	0	24	0	0	23	0	0
chr10	121589293	-	T	chr10:121589293	Tbk1,Xpot	.	UTR	3_prime_UTR_variant	0	0	-	-	-	-	0.443828	0.00251	0.00185	0.808	|	-1.98578	0.00526	0.0209	0.0554	|	0	55	0	0	6	0	0	48	0	0	4	0	3	76	0.0394737	0	4	0	0	29	0	0	2	0	0
chr10	127046476	+	A	chr10:127046476	Cyp27b1,Eef1akmt3,Mettl1	SINE	intergenic	downstream_gene_variant	0	0	127047429	953	downstream	undefined	0	<0.001	<0.001	---	|	-0.656593	0.0924	0.146	0.686	|	0	2	0	---	---	---	0	3	0	0	0	---	0	7	0	0	0	---	0	2	0	---	---	---	0
chr10	127046482	+	A	chr10:127046482	Cyp27b1,Eef1akmt3,Mettl1	SINE	intergenic	downstream_gene_variant	1	1	127047426	944	downstream	undefined	0	<0.001	<0.001	---	|	0.00693854	0.251	0.25	0.99	|	0	2	0	---	---	---	0	3	0	0	0	---	0	7	0	0	0	---	0	2	0	---	---	---	0
chr10	127047352	+	A	chr10:127047352	Cyp27b1,Mettl1	SINE	intergenic	regulatory_region_variant	0	0	-	-	-	-	3.32193	0.01	<0.001	0.423	|	1.66001	0.229	0.0725	0.246	|	0	5	0	---	---	---	0	3	0	0	2	0	0	24	0	0	1	0	0	20	0	---	---	---	0
chr10	127065844	+	A	chr10:127065844	AC134329.1,Cdk4,Tspan31	SINE	Intron	non_coding_transcript_exon_variant	0	0	-	-	-	-	0.756587	0.00169	<0.001	0.363	|	1.2805	0.00718	0.00295	0.325	|	0	23	0	0	33	0	0	14	0	1	43	0.0232558	0	23	0	0	42	0	0	75	0	0	151	0	0
chr10	127067880	-	T	chr10:127067880	AC134329.1,Cdk4,Tspan31	SINE	UTR	3_prime_UTR_variant	0	0	-	-	-	-	-0.725644	0.00182	0.00301	0.626	|	0.975531	0.146	0.0743	0.00134	|	1	123	0.00813008	0	27	0	0	140	0	0	24	0	0	197	0	0	48	0	1	309	0.00323625	0	112	0	5
chr10	127067882	-	T	chr10:127067882	AC134329.1,Cdk4,Tspan31	SINE	UTR	3_prime_UTR_variant	1	1	-	-	-	-	0.823991	0.00896	0.00506	0.72	|	0.622554	0.356	0.231	0.00504	|	1	123	0.00813008	0	27	0	3	140	0.0214286	1	22	0.0454545	0	199	0	0	47	0	0	302	0	7	114	0.0614035	16
chr10	127496506	+	A	chr10:127496506	R3hdm2	SINE	Intron	NMD_transcript_variant	0	0	-	-	-	-	0.435192	0.0179	0.0132	0.85	|	3.57837	0.143	0.012	0.193	|	2	15	0.133333	4	39	0.102564	0	14	0	1	19	0.0526316	2	11	0.181818	2	40	0.05	0	12	0	5	41	0.121951	0
chr10	127496614	+	A	chr10:127496614	R3hdm2	SINE	Intron	NMD_transcript_variant	0	0	127496154	460	upstream	intronic	2.89073	0.0484	0.00652	0.343	|	0.993157	0.00199	<0.001	0.374	|	0	7	0	2	48	0.0416667	1	5	0.2	1	21	0.047619	0	8	0	4	24	0.166667	0	8	0	8	62	0.129032	0
chr10	128018450	+	A	chr10:128018450	Prim1	Simple	Intron	non_coding_transcript_variant	0	0	-	-	-	-	0	<0.001	<0.001	---	|	-1.17566	<0.001	0.00226	0.374	|	0	16	0	0	2	0	0	15	0	0	6	0	0	41	0	0	11	0	0	1	0	0	0	---	0
chr10	128060824	+	A	chr10:128060824	Ptges3	SINE	Intron	regulatory_region_variant	0	0	-	-	-	-	2.29626	0.011	0.00224	0.183	|	3.26503	0.00961	<0.001	0.0765	|	1	8	0.125	13	120	0.108333	0	13	0	11	72	0.152778	0	12	0	14	132	0.106061	0	2	0	0	29	0	0
chr10	128060831	+	A	chr10:128060831	Ptges3	SINE	Intron	regulatory_region_variant	0	0	-	-	-	-	6.1859	0.0728	<0.001	0.00468	|	3.24472	0.00948	<0.001	0.0759	|	0	7	0	25	109	0.229358	0	10	0	5	74	0.0675676	0	11	0	23	126	0.18254	0	5	0	10	30	0.333333	0
chr10	128086654	+	A	chr10:128086654	AC131120.1,Atp5b,Baz2a,Mir677,Snord59a	SINE	Intron	regulatory_region_variant	0	0	-	-	-	-	0.767079	0.0017	<0.001	0.179	|	5.99608	0.119	0.00186	0.00216	|	0	21	0	2	328	0.00609756	0	25	0	0	159	0	0	32	0	1	251	0.00398406	0	13	0	0	33	0	0
chr10	128087334	+	A	chr10:128087334	AC131120.1,Atp5b,Baz2a,Mir677,Snord59a	SINE	Intron	non_coding_transcript_variant	0	0	128087659	325	downstream	intronic	1.58151	0.00299	<0.001	0.175	|	6.0451	0.184	0.00278	0.0235	|	0	17	0	5	196	0.0255102	0	7	0	4	142	0.028169	0	14	0	0	173	0	0	14	0	0	67	0	0
chr10	128087348	+	A	chr10:128087348	AC131120.1,Atp5b,Baz2a,Mir677,Snord59a	SINE	Intron	non_coding_transcript_variant	0	0	128089410	2062	downstream	intronic	2.05524	0.00416	<0.001	0.0882	|	8.06557	0.268	<0.001	1.48e-06	|	0	17	0	9	215	0.0418605	0	9	0	1	131	0.00763359	0	13	0	3	186	0.016129	0	12	0	0	56	0	0
chr10	128087940	+	A	chr10:128087940	AC131120.1,Atp5b,Baz2a,Mir677,Snord59a	SINE	Intron	non_coding_transcript_exon_variant	0	0	-	-	-	-	2.07968	0.00423	<0.001	0.052	|	4.53681	0.0232	<0.001	0.000708	|	0	42	0	3	625	0.0048	0	44	0	2	402	0.00497512	0	52	0	3	543	0.00552486	0	47	0	0	299	0	0
chr10	128088081	+	A	chr10:128088081	Atp5b,Baz2a,Mir677,Snord59a	.	Intron	non_coding_transcript_exon_variant	0	0	-	-	-	-	0.607631	0.00152	<0.001	0.175	|	4.92203	0.0303	<0.001	0.00106	|	0	14	0	0	368	0	0	35	0	1	269	0.00371747	0	45	0	1	297	0.003367	0	60	0	0	153	0	0
chr10	128354659	+	A	chr10:128354659	Cs	SINE	Intron	intron_variant	1	1	128356318	1659	downstream	intronic	3.57564	0.0119	<0.001	0.0818	|	4.8803	0.235	0.00799	0.0615	|	0	27	0	11	37	0.297297	0	14	0	6	27	0.222222	0	18	0	2	46	0.0434783	0	6	0	0	0	---	0
chr10	128402923	-	T	chr10:128402923	Ankrd52,Gm25361,Nabp2,Slc39a5	SINE	Intron	non_coding_transcript_variant	1	1	-	-	-	-	2.44103	0.00543	<0.001	0.175	|	1.82609	0.088	0.0248	0.585	|	0	4	0	2	13	0.153846	0	1	0	0	11	0	0	4	0	2	12	0.166667	0	3	0	0	0	---	0
chr10	128441273	+	A	chr10:128441273	Rnf41	SINE	UTR	3_prime_UTR_variant	1	1	-	-	-	-	0	<0.001	<0.001	---	|	0.946603	0.369	0.192	0.0369	|	0	32	0	0	5	0	0	16	0	0	4	0	0	21	0	0	8	0	0	29	0	0	4	0	0
chr10	128446902	+	A	chr10:128446902	-	SINE	intergenic	intergenic_variant	0	0	128446072	830	upstream	undefined	-3.05815	<0.001	0.00833	0.0789	|	2.10122	0.0162	0.00378	0.148	|	0	10	0	0	8	0	1	16	0.0625	0	1	0	5	36	0.138889	0	0	---	1	26	0.0384615	0	5	0	0
chr10	128561139	-	T	chr10:128561139	AC117232.1,Pa2g4	SINE	Intron	intron_variant	0	0	128562067	928	upstream	intronic	0	<0.001	<0.001	---	|	1.53671	0.0187	0.00643	0.421	|	0	0	---	0	61	0	0	1	0	0	62	0	0	14	0	0	70	0	0	6	0	0	48	0	0
chr10	128632443	-	T	chr10:128632443	Ikzf4	Simple	UTR	3_prime_UTR_variant	0	0	128630671	1772	downstream	undefined	0	<0.001	<0.001	---	|	3.78106	0.205	0.0149	0.0902	|	0	0	---	0	0	---	---	---	---	0	0	---	0	0	---	---	---	---	0	0	---	0	0	---	0
chr10	128670060	-	T	chr10:128670060	AC117232.4,Suox	SINE	UTR	regulatory_region_variant	0	0	-	-	-	-	-1.08992	<0.001	0.00213	0.363	|	0.306437	0.14	0.113	0.49	|	0	27	0	0	5	0	0	16	0	0	2	0	0	20	0	0	11	0	0	60	0	0	19	0	0
chr10	128799375	+	A	chr10:128799375	AC131081.1,Dnajc14,Mmp19,Tmem198b	SINE	UTR	3_prime_UTR_variant	0	0	-	-	-	-	-2.26087	0.00467	0.0224	0.262	|	1.47563	0.0149	0.00534	0.386	|	1	22	0.0454545	1	12	0.0833333	4	18	0.222222	0	10	0	1	20	0.05	2	16	0.125	3	12	0.25	0	3	0	0
chr10	128799402	+	A	chr10:128799402	AC131081.1,Dnajc14,Mmp19,Tmem198b	SINE	UTR	3_prime_UTR_variant	0	0	128797729	1673	upstream	intronic	1.47521	0.0309	0.0111	0.649	|	0.175334	0.0129	0.0114	0.932	|	1	27	0.037037	2	10	0.2	0	25	0	2	12	0.166667	0	27	0	2	19	0.105263	2	13	0.153846	0	13	0	0
chr10	128799423	+	A	chr10:128799423	AC131081.1,Dnajc14,Mmp19,Tmem198b	SINE	UTR	3_prime_UTR_variant	0	0	128797704	1719	upstream	intronic	0.763548	0.0815	0.048	0.725	|	2.20792	0.0515	0.0112	0.323	|	1	32	0.03125	1	11	0.0909091	2	33	0.0606061	5	18	0.277778	6	37	0.162162	3	23	0.130435	2	10	0.2	5	14	0.357143	0
chr10	128799425	+	A	chr10:128799425	AC131081.1,Dnajc14,Mmp19,Tmem198b	SINE	UTR	3_prime_UTR_variant	0	0	128797701	1724	upstream	intronic	0.589988	0.0952	0.0632	0.791	|	-0.00201353	0.0984	0.0985	0.998	|	5	32	0.15625	5	11	0.454545	2	34	0.0588235	4	19	0.210526	9	37	0.243243	5	23	0.217391	1	10	0.1	2	14	0.142857	0
chr10	128799433	+	A	chr10:128799433	AC131081.1,Dnajc14,Mmp19,Tmem198b	SINE	UTR	3_prime_UTR_variant	1	1	128797694	1739	upstream	intronic	-1.69692	0.0406	0.132	0.311	|	0.614086	0.188	0.123	0.0915	|	10	31	0.322581	3	12	0.25	9	32	0.28125	6	16	0.375	12	36	0.333333	7	21	0.333333	3	10	0.3	2	14	0.142857	0
chr10	128799463	+	A	chr10:128799463	AC131081.1,Dnajc14,Mmp19,Tmem198b	SINE	UTR	3_prime_UTR_variant	0	0	128797663	1800	upstream	intronic	-3.126	0.00237	0.0207	0.123	|	1.09989	0.00474	0.00221	0.388	|	2	30	0.0666667	0	9	0	2	32	0.0625	3	17	0.176471	2	40	0.05	0	21	0	0	6	0	0	15	0	0
chr10	128800542	+	A	chr10:128800542	AC131081.1,Dnajc14,Mmp19,Tmem198b	SINE	UTR	3_prime_UTR_variant	1	1	-	-	-	-	-0.696624	0.11	0.178	0.649	|	0.909487	0.123	0.0653	0.0487	|	13	66	0.19697	9	30	0.3	22	82	0.268293	8	32	0.25	20	91	0.21978	7	27	0.259259	7	73	0.0958904	7	23	0.304348	11
chr10	128800568	+	A	chr10:128800568	AC131081.1,Dnajc14,Mmp19,Tmem198b	SINE	UTR	3_prime_UTR_variant	0	0	-	-	-	-	-2.27881	0.00812	0.0394	0.167	|	-1.78339	0.00343	0.0118	0.202	|	2	69	0.0289855	2	31	0.0645161	3	72	0.0416667	4	30	0.133333	4	91	0.043956	1	30	0.0333333	3	85	0.0352941	0	23	0	3
chr10	128800569	+	A	chr10:128800569	AC131081.1,Dnajc14,Mmp19,Tmem198b	SINE	UTR	3_prime_UTR_variant	1	1	-	-	-	-	0.155388	0.36	0.323	0.647	|	0.929004	0.217	0.114	0.0235	|	35	69	0.507246	15	31	0.483871	28	71	0.394366	13	30	0.433333	40	93	0.430108	14	28	0.5	12	85	0.141176	7	23	0.304348	21
chr10	128800572	+	A	chr10:128800572	AC131081.1,Dnajc14,Mmp19,Tmem198b	SINE	UTR	3_prime_UTR_variant	1	1	-	-	-	-	0.206122	0.38	0.329	0.614	|	1.04539	0.197	0.0952	0.052	|	32	69	0.463768	13	32	0.40625	27	70	0.385714	17	27	0.62963	36	91	0.395604	17	27	0.62963	12	90	0.133333	6	23	0.26087	22
chr10	128800579	-	T	chr10:128800579	AC131081.1,Dnajc14,Mmp19,Tmem198b	SINE	UTR	3_prime_UTR_variant	0	0	128799423	1156	downstream	UTR	0	<0.001	<0.001	---	|	-1.1413	0.0036	0.00794	0.358	|	0	67	0	0	33	0	0	70	0	0	26	0	0	89	0	0	27	0	0	91	0	0	21	0	0
chr10	128800589	+	A	chr10:128800589	AC131081.1,Dnajc14,Mmp19,Tmem198b	SINE	UTR	3_prime_UTR_variant	0	0	128799412	1177	upstream	UTR	-0.265362	0.0444	0.0534	0.771	|	-1.07692	0.027	0.0569	0.491	|	6	61	0.0983607	4	30	0.133333	11	67	0.164179	2	25	0.08	5	92	0.0543478	7	27	0.259259	4	87	0.045977	2	20	0.1	1
chr10	128809479	+	A	chr10:128809479	Dnajc14	SINE	Intron	regulatory_region_variant	0	0	-	-	-	-	0.481825	0.00306	0.00219	0.794	|	4.62636	0.158	0.00639	0.0395	|	0	28	0	0	114	0	0	33	0	2	70	0.0285714	0	44	0	3	104	0.0288462	2	18	0.111111	0	9	0	0
chr11	3233662	+	A	chr11:3233662	Drg1,Eif4enif1	SINE	Intron	NMD_transcript_variant	0	0	3233164	498	upstream	intronic	1.51963	0.00287	<0.001	0.363	|	0.0895151	0.466	0.438	0.826	|	0	13	0	0	9	0	0	13	0	0	4	0	0	10	0	0	6	0	0	6	0	0	12	0	0
chr11	3233663	+	A	chr11:3233663	Drg1,Eif4enif1	SINE	Intron	NMD_transcript_variant	1	1	3233164	499	upstream	intronic	0.412322	0.00287	0.00215	0.849	|	0.418286	0.29	0.217	0.464	|	0	13	0	0	9	0	0	13	0	0	4	0	1	10	0.1	0	6	0	0	6	0	0	12	0	0
chr11	3247110	-	T	chr11:3247110	Drg1,Eif4enif1	SINE	intergenic	NMD_transcript_variant	0	0	3249028	1918	upstream	undefined	-1.25106	<0.001	0.00238	0.363	|	1.94341	0.096	0.025	0.287	|	2	11	0.181818	0	6	0	0	8	0	0	0	---	0	12	0	0	10	0	0	10	0	0	9	0	0
chr11	3250683	-	T	chr11:3250683	Drg1	SINE	Intron	non_coding_transcript_variant	1	1	3251128	445	upstream	intronic	0	<0.001	<0.001	---	|	-0.0987978	0.00653	0.00699	0.967	|	0	8	0	0	10	0	0	5	0	0	8	0	0	5	0	0	7	0	0	4	0	0	9	0	0
chr11	3457568	+	A	chr11:3457568	8430429K09Rik	SINE	Exon	regulatory_region_variant	0	0	3456579	989	upstream	intronic	0	<0.001	<0.001	---	|	2.80845	0.014	0.002	0.297	|	0	10	0	---	---	---	0	7	0	---	---	---	0	18	0	0	1	0	0	19	0	0	2	0	0
chr11	3457590	+	A	chr11:3457590	8430429K09Rik	SINE	Exon	regulatory_region_variant	1	1	-	-	-	-	0	<0.001	<0.001	---	|	-0.0942206	0.0188	0.0201	0.971	|	0	12	0	---	---	---	0	5	0	---	---	---	0	16	0	0	1	0	0	14	0	0	2	0	0
chr11	3920135	-	T	chr11:3920135	Tcn2	SINE	Intron	intron_variant	0	0	3918322	1813	downstream	intronic	4.24582	0.019	<0.001	0.0259	|	2.19316	0.0158	0.00347	0.572	|	0	39	0	5	55	0.0909091	0	57	0	3	34	0.0882353	0	54	0	3	24	0.125	0	61	0	0	35	0	0
chr11	3980891	+	A	chr11:3980891	4930556J24Rik,Gal3st1,Pes1	SINE	intergenic	downstream_gene_variant	0	0	3982239	1348	downstream	undefined	-5.97947	<0.001	0.0631	0.0705	|	-0.179486	0.0177	0.0201	0.957	|	0	0	---	0	0	---	1	1	1	0	0	---	1	1	1	0	0	---	2	2	1	0	1	0	0
chr11	3980984	+	A	chr11:3980984	4930556J24Rik,Gal3st1,Pes1	SINE	intergenic	downstream_gene_variant	0	0	3982175	1191	downstream	undefined	-4.39914	<0.001	0.0211	0.0785	|	1.1343	0.0329	0.015	0.567	|	0	0	---	0	1	0	1	2	0.5	0	0	---	0	2	0	0	0	---	3	17	0.176471	0	2	0	0
chr11	4141383	-	T	chr11:4141383	Ccdc157,Mir3060,Rnf215	SINE	UTR	3_prime_UTR_variant	0	0	-	-	-	-	0	<0.001	<0.001	---	|	-2.30225	0.00804	0.0397	0.0869	|	0	4	0	0	1	0	0	5	0	0	0	---	0	3	0	0	0	---	0	17	0	0	14	0	0
chr11	4141399	-	T	chr11:4141399	Ccdc157,Mir3060,Rnf215	SINE	UTR	3_prime_UTR_variant	1	1	-	-	-	-	-2.37652	<0.001	0.00519	0.183	|	1.20831	0.107	0.0464	0.0912	|	1	3	0.333333	0	1	0	0	5	0	0	0	---	0	6	0	0	0	---	1	17	0.0588235	0	14	0	0
chr11	4142032	-	T	chr11:4142032	Ccdc157,Mir3060,Rnf215	SINE	UTR	3_prime_UTR_variant	1	1	4141272	760	downstream	UTR	0	<0.001	<0.001	---	|	-3.67609	0.00171	0.0219	0.0463	|	0	8	0	0	7	0	0	7	0	0	0	---	0	5	0	0	3	0	0	23	0	0	7	0	0
chr11	4142039	-	T	chr11:4142039	Ccdc157,Mir3060,Rnf215	SINE	UTR	3_prime_UTR_variant	0	0	-	-	-	-	0	<0.001	<0.001	---	|	2.22516	0.0583	0.0125	0.309	|	0	8	0	0	6	0	0	8	0	0	0	---	0	5	0	0	3	0	0	25	0	0	7	0	0
chr11	4142042	-	T	chr11:4142042	Ccdc157,Mir3060,Rnf215	SINE	UTR	3_prime_UTR_variant	1	1	-	-	-	-	-1.19307	<0.001	0.00229	0.363	|	0.15095	0.143	0.129	0.766	|	1	7	0.142857	0	3	0	0	9	0	0	0	---	0	5	0	0	3	0	0	26	0	0	4	0	0
chr11	4142046	-	T	chr11:4142046	Ccdc157,Mir3060,Rnf215	SINE	UTR	3_prime_UTR_variant	1	1	-	-	-	-	-1.3968	<0.001	0.00263	0.363	|	-0.114374	0.0632	0.0684	0.888	|	0	6	0	0	3	0	0	9	0	0	0	---	2	6	0.333333	0	3	0	0	25	0	0	4	0	0
chr11	4142048	-	T	chr11:4142048	Ccdc157,Mir3060,Rnf215	SINE	UTR	3_prime_UTR_variant	1	1	4142780	732	upstream	UTR	-1.01963	0.00242	0.0049	0.665	|	0.592958	0.0523	0.0347	0.505	|	1	6	0.166667	0	3	0	0	9	0	0	0	---	0	6	0	0	3	0	0	26	0	0	4	0	0
chr11	4142052	+	A	chr11:4142052	Ccdc157,Mir3060,Rnf215	SINE	UTR	3_prime_UTR_variant	0	0	-	-	-	-	0	<0.001	<0.001	---	|	1.10127	0.00215	<0.001	0.374	|	0	6	0	0	2	0	0	9	0	0	0	---	0	6	0	0	3	0	0	26	0	0	4	0	0
chr11	4142057	+	A	chr11:4142057	Ccdc157,Mir3060,Rnf215	SINE	UTR	3_prime_UTR_variant	0	0	-	-	-	-	0	<0.001	<0.001	---	|	-0.959172	<0.001	0.00194	0.374	|	0	6	0	0	2	0	0	9	0	0	0	---	0	5	0	0	3	0	0	25	0	0	4	0	0
chr11	4142067	-	T	chr11:4142067	Ccdc157,Mir3060,Rnf215	SINE	UTR	3_prime_UTR_variant	0	0	-	-	-	-	-1.47616	<0.001	0.00278	0.374	|	1.38224	0.0567	0.0218	0.513	|	0	6	0	0	3	0	0	8	0	0	0	---	0	6	0	0	3	0	0	20	0	---	---	---	1
chr11	4142082	-	T	chr11:4142082	Ccdc157,Mir3060,Rnf215	SINE	UTR	3_prime_UTR_variant	1	1	-	-	-	-	0	<0.001	<0.001	---	|	1.71544	0.0298	0.00906	0.414	|	0	6	0	0	3	0	0	7	0	0	0	---	0	7	0	0	2	0	0	13	0	---	---	---	0
chr11	4142085	-	T	chr11:4142085	Ccdc157,Mir3060,Rnf215	SINE	UTR	3_prime_UTR_variant	1	1	4142739	654	upstream	UTR	2.49145	0.00562	<0.001	0.391	|	0.655835	0.393	0.249	0.0311	|	0	6	0	0	1	0	0	7	0	0	0	---	0	7	0	0	2	0	1	13	0.0769231	---	---	---	0
chr11	4142107	-	T	chr11:4142107	Ccdc157,Mir3060,Rnf215	SINE	UTR	3_prime_UTR_variant	0	0	-	-	-	-	0.4	0.00398	0.00302	0.374	|	0.850159	0.117	0.0646	0.134	|	0	6	0	0	2	0	0	4	0	0	0	---	0	7	0	0	2	0	0	10	0	---	---	---	4
chr11	4142108	-	T	chr11:4142108	Ccdc157,Mir3060,Rnf215	SINE	UTR	3_prime_UTR_variant	1	1	4141320	788	downstream	UTR	0	<0.001	<0.001	---	|	0.421083	0.0274	0.0204	0.824	|	0	6	0	0	2	0	0	4	0	0	0	---	0	7	0	0	2	0	0	10	0	---	---	---	0
chr11	4142131	-	T	chr11:4142131	Ccdc157,Mir3060,Rnf215	LTR	UTR	3_prime_UTR_variant	0	0	-	-	-	-	0	<0.001	<0.001	---	|	1.01638	0.0109	0.00538	0.683	|	0	2	0	0	2	0	0	3	0	0	0	---	0	7	0	0	2	0	0	7	0	---	---	---	0
chr11	4142455	-	T	chr11:4142455	Ccdc157,Mir3060,Rnf215	SINE	UTR	3_prime_UTR_variant	0	0	-	-	-	-	1.91015	0.00376	<0.001	0.374	|	-3.29645	0.0036	0.0354	0.0667	|	0	7	0	0	0	---	0	5	0	0	0	---	0	6	0	0	0	---	0	17	0	---	---	---	0
chr11	4142468	-	T	chr11:4142468	Ccdc157,Mir3060,Rnf215	SINE	UTR	3_prime_UTR_variant	0	0	-	-	-	-	0	<0.001	<0.001	---	|	-0.105078	0.0138	0.0148	0.962	|	0	7	0	0	0	---	0	3	0	0	0	---	0	6	0	0	0	---	0	14	0	0	1	0	0
chr11	4142775	-	T	chr11:4142775	Ccdc157,Mir3060,Rnf215	SINE	UTR	3_prime_UTR_variant	0	0	4142048	727	downstream	UTR	0	<0.001	<0.001	---	|	0.886849	0.0914	0.0494	0.156	|	0	1	0	0	0	---	0	0	---	0	0	---	0	6	0	0	0	---	0	7	0	---	---	---	0
chr11	4142780	-	T	chr11:4142780	Ccdc157,Mir3060,Rnf215	SINE	UTR	3_prime_UTR_variant	0	0	4143515	735	upstream	UTR	0	<0.001	<0.001	---	|	2.46796	0.217	0.0393	0.183	|	0	1	0	0	0	---	0	0	---	0	0	---	0	6	0	0	0	---	0	7	0	---	---	---	0
chr11	4142790	-	T	chr11:4142790	Ccdc157,Mir3060,Rnf215	SINE	UTR	3_prime_UTR_variant	0	0	-	-	-	-	3.81671	0.0141	<0.001	0.178	|	0.748682	0.624	0.371	0.0801	|	0	1	0	0	0	---	0	0	---	0	0	---	0	6	0	0	0	---	2	7	0.285714	---	---	---	0
chr11	4767141	-	T	chr11:4767141	Nf2	.	UTR	3_prime_UTR_variant	0	0	-	-	-	-	-3.34645	0.015	0.153	0.0866	|	0.194139	0.198	0.173	0.157	|	12	84	0.142857	0	5	0	5	78	0.0641026	0	6	0	15	102	0.147059	0	2	0	14	86	0.162791	15	38	0.394737	19
chr11	4886680	+	A	chr11:4886680	Mir6918,Nipsnap1	SINE	Intron	non_coding_transcript_variant	0	0	-	-	-	-	1.66096	0.00316	<0.001	0.363	|	3.49781	0.181	0.016	0.12	|	0	1	0	0	0	---	0	0	---	0	1	0	0	1	0	0	2	0	0	0	---	0	5	0	0
chr11	5075827	-	T	chr11:5075827	Ewsr1	SINE	Intron	non_coding_transcript_variant	0	0	5075600	227	downstream	intronic	2.02693	0.0272	0.00668	0.47	|	-0.115989	0.302	0.327	0.796	|	0	16	0	22	171	0.128655	2	10	0.2	30	173	0.17341	0	22	0	17	127	0.133858	0	9	0	0	24	0	8
chr11	5075828	-	T	chr11:5075828	Ewsr1	SINE	Intron	non_coding_transcript_variant	0	0	5075599	229	downstream	intronic	2.04726	0.00957	0.00231	0.184	|	-0.385316	0.164	0.214	0.435	|	0	16	0	9	171	0.0526316	2	13	0.153846	24	176	0.136364	0	21	0	14	131	0.10687	0	9	0	0	25	0	0
chr11	5075867	-	T	chr11:5075867	Ewsr1	SINE	Intron	non_coding_transcript_variant	0	0	5074939	928	downstream	intronic	3.06378	0.00836	<0.001	0.0762	|	3.75158	0.0913	0.00678	0.128	|	0	20	0	13	172	0.0755814	0	14	0	15	172	0.0872093	0	24	0	7	135	0.0518519	0	10	0	0	19	0	0
chr11	5075873	-	T	chr11:5075873	Ewsr1	SINE	Intron	non_coding_transcript_variant	1	1	5074933	940	downstream	intronic	1.54586	0.0143	0.00489	0.267	|	0.494871	0.498	0.354	0.0297	|	2	21	0.0952381	34	165	0.206061	2	14	0.142857	34	170	0.2	0	22	0	27	132	0.204545	0	12	0	0	23	0	0
chr11	5525558	+	A	chr11:5525558	Ccdc117,Xbp1	SINE	UTR	3_prime_UTR_variant	0	0	-	-	-	-	-0.58191	0.0708	0.106	0.00286	|	0.773196	0.05	0.0293	0.0988	|	45	417	0.107914	34	544	0.0625	39	411	0.0948905	35	502	0.0697211	50	601	0.0831947	38	745	0.0510067	182	1302	0.139785	120	1506	0.0796813	90
chr11	5782196	+	A	chr11:5782196	Ube2d-ps	.	Exon	regulatory_region_variant	0	0	-	-	-	-	0	<0.001	<0.001	---	|	0.676366	0.0185	0.0116	0.833	|	0	26	0	---	---	---	0	10	0	0	0	---	0	26	0	0	4	0	0	30	0	0	2	0	0
chr11	5800467	+	A	chr11:5800467	Dbnl,Pgam2	.	UTR	3_prime_UTR_variant	0	0	-	-	-	-	-1.00982	0.00503	0.0101	0.285	|	0.748886	0.00561	0.00334	0.418	|	10	973	0.0102775	3	120	0.025	22	761	0.0289093	5	76	0.0657895	20	966	0.0207039	1	101	0.00990099	20	1573	0.0127146	0	152	0	8
chr11	5967429	+	A	chr11:5967429	Camk2b,Ykt6	.	UTR	3_prime_UTR_variant	0	0	5967562	133	downstream	UTR	-0.480069	0.0489	0.0682	0.305	|	-0.141753	0.0597	0.0659	0.541	|	26	237	0.109705	3	83	0.0361446	11	233	0.0472103	5	66	0.0757576	12	273	0.043956	5	80	0.0625	49	465	0.105376	33	299	0.110368	18
chr11	6260797	-	T	chr11:6260797	Ddx56	SINE	Intron	intron_variant	0	0	6259882	915	downstream	intronic	0.84719	0.0018	<0.001	0.363	|	3.80208	0.0139	<0.001	0.0241	|	0	4	0	2	59	0.0338983	0	9	0	0	57	0	0	11	0	0	71	0	0	11	0	0	57	0	0
chr11	6260894	-	T	chr11:6260894	Ddx56	SINE	Intron	intron_variant	0	0	-	-	-	-	3.68944	0.0129	<0.001	0.0271	|	5.80918	0.162	0.00289	0.0142	|	0	7	0	1	46	0.0217391	0	6	0	2	26	0.0769231	0	7	0	3	64	0.046875	0	5	0	2	34	0.0588235	0
chr11	6260895	-	T	chr11:6260895	Ddx56	SINE	Intron	intron_variant	1	1	-	-	-	-	6.11646	0.461	0.00664	0.014	|	2.86735	0.954	0.131	0.182	|	0	7	0	31	46	0.673913	0	6	0	16	26	0.615385	1	7	0.142857	35	66	0.530303	3	5	0.6	22	34	0.647059	0
chr11	6355673	+	A	chr11:6355673	Ogdh	.	UTR	stop_lost	0	0	-	-	-	-	-3.0137	0.00149	0.0121	0.00584	|	0.231131	0.00993	0.00846	0.791	|	2	205	0.0097561	0	104	0	4	263	0.0152091	1	90	0.0111111	2	316	0.00632911	0	114	0	6	449	0.013363	0	174	0	6
chr11	6471282	-	T	chr11:6471282	Gm11973,Gm22123,Purb	.	UTR	3_prime_UTR_variant	0	0	6471337	55	upstream	UTR	1.61679	0.0156	0.00509	0.181	|	-0.873174	<0.001	0.00183	0.374	|	8	313	0.0255591	10	485	0.0206186	3	210	0.0142857	10	355	0.028169	3	322	0.00931677	23	536	0.0429104	0	38	0	1	27	0.037037	---
chr11	6472245	-	T	chr11:6472245	Gm11973,Gm22123,Purb	.	UTR	regulatory_region_variant	0	0	6472253	8	upstream	UTR	1.81133	0.0209	0.00596	0.33	|	0	<0.001	<0.001	---	|	5	203	0.0246305	8	396	0.020202	5	127	0.0393701	4	223	0.0179372	9	195	0.0461538	5	352	0.0142045	0	10	0	1	16	0.0625	0
chr11	7170104	+	A	chr11:7170104	Adcy1	.	UTR	3_prime_UTR_variant	0	0	-	-	-	-	0	<0.001	<0.001	---	|	-0.519195	0.0127	0.0181	0.734	|	---	---	---	---	---	---	---	---	---	---	---	---	---	---	---	---	---	---	0	3	0	0	2	0	---
chr11	11932286	-	T	chr11:11932286	Grb10	.	UTR	3_prime_UTR_variant	0	0	-	-	-	-	1.05047	0.00207	<0.001	0.363	|	-0.0890346	0.016	0.017	0.849	|	0	9	0	0	8	0	0	14	0	0	6	0	0	13	0	0	6	0	0	21	0	0	29	0	0
chr11	11932287	-	T	chr11:11932287	Grb10	.	UTR	3_prime_UTR_variant	0	0	11932331	44	upstream	UTR	0	<0.001	<0.001	---	|	0.820115	0.0241	0.0137	0.0193	|	0	9	0	0	7	0	0	14	0	0	6	0	0	13	0	0	6	0	0	21	0	0	29	0	0
chr11	17199744	+	A	chr11:17199744	Pno1,Ppp3r1,Wdr92	.	UTR	regulatory_region_variant	0	0	-	-	-	-	-4.41395	0.00129	0.0275	3.25e-05	|	-1.33726	0.00102	0.00258	0.0708	|	21	690	0.0304348	1	435	0.00229885	29	582	0.0498282	0	316	0	32	792	0.040404	1	495	0.0020202	18	593	0.0303541	0	367	0	9
chr11	23455999	+	A	chr11:23455999	Usp34	.	Intron	3_prime_UTR_variant	0	0	-	-	-	-	-2.62694	<0.001	0.00618	0.175	|	2.53963	0.0262	0.00451	0.116	|	0	7	0	0	51	0	0	11	0	0	44	0	2	9	0.222222	0	66	0	0	13	0	0	19	0	0
chr11	23478344	+	A	chr11:23478344	Gm22753,Usp34	SINE	Intron	intron_variant	0	0	23480079	1735	downstream	intronic	1.3968	0.00263	<0.001	0.363	|	2.60934	0.108	0.0177	0.395	|	0	15	0	0	6	0	0	21	0	1	3	0.333333	0	12	0	0	15	0	0	27	0	0	5	0	0
chr11	23478549	-	T	chr11:23478549	Gm22753,Usp34	SINE	Intron	intron_variant	0	0	-	-	-	-	-4.8572	<0.001	0.029	0.0295	|	-5.09875	0.00709	0.243	0.0492	|	6	23	0.26087	0	4	0	1	10	0.1	0	2	0	1	22	0.0454545	0	5	0	5	10	0.5	0	0	---	0
chr11	29216628	-	T	chr11:29216628	Cfap36,Ppp4r3b	SINE	Intron	non_coding_transcript_variant	0	0	-	-	-	-	-1.08439	<0.001	0.00212	0.363	|	0	<0.001	<0.001	---	|	0	19	0	0	27	0	0	13	0	0	36	0	2	22	0.0909091	0	36	0	0	1	0	0	0	---	0
chr11	29216690	-	T	chr11:29216690	Cfap36,Ppp4r3b	SINE	Intron	non_coding_transcript_variant	1	1	-	-	-	-	0	<0.001	<0.001	---	|	0.830894	0.00369	0.00207	0.681	|	0	21	0	0	41	0	0	14	0	0	29	0	0	18	0	0	41	0	0	4	0	0	5	0	0
chr11	30101758	-	T	chr11:30101758	Gm29237,Sptbn1	SINE	Intron	non_coding_transcript_exon_variant	1	1	-	-	-	-	0	<0.001	<0.001	---	|	-0.959172	<0.001	0.00194	0.374	|	0	19	0	0	45	0	0	7	0	0	16	0	0	15	0	0	19	0	0	22	0	0	9	0	0
chr11	30101812	-	T	chr11:30101812	Gm29237,Sptbn1	SINE	Intron	non_coding_transcript_exon_variant	1	1	-	-	-	-	0	<0.001	<0.001	---	|	4.98793	0.0573	0.00181	0.0079	|	0	14	0	0	33	0	0	9	0	0	13	0	0	17	0	0	13	0	0	21	0	0	17	0	0
chr11	30900717	-	T	chr11:30900717	Asb3	LINE	Intron	intron_variant	0	0	-	-	-	-	0	<0.001	<0.001	---	|	-0.728771	<0.001	0.00166	0.374	|	0	1	0	0	2	0	0	7	0	0	4	0	0	11	0	0	2	0	0	1	0	0	0	---	---
chr11	30927239	-	T	chr11:30927239	Asb3,Erlec1	SINE	Intron	intron_variant	1	1	-	-	-	-	0.459148	0.00251	0.00183	0.801	|	1.10127	0.00215	<0.001	0.374	|	1	27	0.037037	0	2	0	0	43	0	0	2	0	0	23	0	1	4	0.25	0	4	0	0	3	0	0
chr11	30927265	-	T	chr11:30927265	Asb3,Erlec1	SINE	Intron	intron_variant	1	1	-	-	-	-	-0.520049	0.00296	0.00424	0.685	|	-0.661158	0.0394	0.0623	0.776	|	0	19	0	0	2	0	2	23	0.0869565	2	3	0.666667	1	15	0.0666667	0	1	0	0	1	0	0	3	0	0
chr11	30927276	-	T	chr11:30927276	Asb3,Erlec1	SINE	Intron	intron_variant	0	0	-	-	-	-	0	<0.001	<0.001	---	|	1.25563	0.0537	0.0225	0.693	|	0	19	0	0	1	0	0	22	0	0	3	0	0	13	0	0	1	0	0	0	---	0	3	0	0
chr11	30927277	-	T	chr11:30927277	Asb3,Erlec1	SINE	Intron	intron_variant	1	1	-	-	-	-	-0.66264	0.00296	0.00468	0.599	|	-1.60078	0.00511	0.0155	0.279	|	0	19	0	0	1	0	3	22	0.136364	2	3	0.666667	1	13	0.0769231	0	1	0	0	0	---	0	3	0	0
chr11	30942811	-	T	chr11:30942811	Asb3,Erlec1	SINE	Intron	non_coding_transcript_exon_variant	0	0	-	-	-	-	1.00982	0.00201	<0.001	0.363	|	2.76882	0.0572	0.00839	0.167	|	0	11	0	0	29	0	0	8	0	2	30	0.0666667	0	7	0	0	41	0	0	63	0	0	66	0	0
chr11	30942820	-	T	chr11:30942820	Asb3,Erlec1	SINE	Intron	non_coding_transcript_exon_variant	0	0	-	-	-	-	0	<0.001	<0.001	---	|	4.10349	0.0172	<0.001	0.0748	|	0	12	0	0	28	0	0	6	0	0	31	0	0	6	0	0	36	0	0	67	0	0	68	0	0
chr11	30942879	-	T	chr11:30942879	Asb3,Erlec1	SINE	Intron	non_coding_transcript_exon_variant	0	0	-	-	-	-	1.0159	0.00202	<0.001	0.363	|	5.60592	0.145	0.00297	0.00808	|	0	18	0	0	42	0	0	15	0	0	36	0	0	10	0	0	45	0	0	98	0	0	77	0	0
chr11	32290434	+	A	chr11:32290434	Hbq1b	SINE	intergenic	regulatory_region_variant	0	0	32288345	2089	upstream	intergenic	-0.578835	0.0364	0.0544	0.574	|	0	<0.001	<0.001	---	|	4	46	0.0869565	2	94	0.0212766	3	69	0.0434783	8	135	0.0592593	8	55	0.145455	7	144	0.0486111	4	113	0.0353982	3	143	0.020979	15
chr11	32290486	+	A	chr11:32290486	Hbq1b	SINE	intergenic	regulatory_region_variant	0	0	32288291	2195	upstream	undefined	1.01757	0.00746	0.00368	0.423	|	0	<0.001	<0.001	---	|	0	34	0	0	72	0	0	52	0	1	105	0.00952381	2	40	0.05	5	97	0.0515464	0	56	0	0	148	0	3
chr11	32290487	+	A	chr11:32290487	Hbq1b	SINE	intergenic	regulatory_region_variant	0	0	32288290	2197	upstream	undefined	1.56601	0.0263	0.00889	0.475	|	0	<0.001	<0.001	---	|	0	32	0	3	72	0.0416667	4	53	0.0754717	3	106	0.0283019	3	39	0.0769231	10	96	0.104167	0	56	0	5	150	0.0333333	0
chr11	32290511	+	A	chr11:32290511	Hbq1b	SINE	intergenic	regulatory_region_variant	0	0	32288267	2244	upstream	undefined	-0.296476	0.0121	0.0148	0.847	|	0	<0.001	<0.001	---	|	1	22	0.0454545	2	58	0.0344828	2	37	0.0540541	0	67	0	0	34	0	2	58	0.0344828	0	32	0	0	114	0	6
chr11	32290514	+	A	chr11:32290514	Hbq1b	SINE	intergenic	regulatory_region_variant	0	0	32288266	2248	upstream	undefined	3.49574	0.0212	0.00188	0.0336	|	0	<0.001	<0.001	---	|	1	23	0.0434783	2	58	0.0344828	0	35	0	1	62	0.016129	0	30	0	2	59	0.0338983	0	22	0	0	110	0	0
chr11	32293189	+	A	chr11:32293189	Hba-a2	SINE	intergenic	upstream_gene_variant	0	0	32293316	127	downstream	undefined	4.23362	0.0704	0.00374	0.0299	|	0	<0.001	<0.001	---	|	1	13	0.0769231	1	12	0.0833333	2	56	0.0357143	1	24	0.0416667	0	23	0	1	33	0.030303	0	7	0	1	26	0.0384615	0
chr11	32293203	+	A	chr11:32293203	Hba-a2	SINE	intergenic	upstream_gene_variant	0	0	32293302	99	downstream	undefined	3.06325	0.0544	0.0065	0.0826	|	0	<0.001	<0.001	---	|	1	24	0.0416667	1	26	0.0384615	3	57	0.0526316	4	32	0.125	1	29	0.0344828	8	40	0.2	0	12	0	7	36	0.194444	0
chr11	32293268	+	A	chr11:32293268	Hba-a2	Satellite	intergenic	upstream_gene_variant	0	0	-	-	-	-	1.72367	0.0288	0.00872	0.486	|	0	<0.001	<0.001	---	|	0	31	0	2	35	0.0571429	1	63	0.015873	2	43	0.0465116	0	40	0	2	41	0.0487805	0	22	0	9	62	0.145161	4
chr11	32293307	+	A	chr11:32293307	Hba-a2	SINE	intergenic	upstream_gene_variant	0	0	32293197	110	upstream	undefined	0.387555	0.345	0.263	0.293	|	0	<0.001	<0.001	---	|	2	30	0.0666667	3	33	0.0909091	5	25	0.2	8	27	0.296296	3	27	0.111111	7	21	0.333333	12	25	0.48	34	50	0.68	9
chr11	32293308	+	A	chr11:32293308	Hba-a2	SINE	intergenic	upstream_gene_variant	0	0	32293197	111	upstream	undefined	0.0293638	0.287	0.282	0.943	|	0	<0.001	<0.001	---	|	2	29	0.0689655	3	33	0.0909091	5	22	0.227273	6	26	0.230769	3	26	0.115385	6	19	0.315789	12	25	0.48	31	50	0.62	11
chr11	32293313	+	A	chr11:32293313	Hba-a2	SINE	intergenic	upstream_gene_variant	0	0	32293192	121	upstream	undefined	-0.451014	0.0174	0.0238	0.797	|	0	<0.001	<0.001	---	|	0	29	0	0	31	0	1	18	0.0555556	2	24	0.0833333	0	23	0	1	13	0.0769231	4	28	0.142857	5	48	0.104167	7
chr11	32293316	+	A	chr11:32293316	Hba-a2	SINE	intergenic	upstream_gene_variant	0	0	32293189	127	upstream	undefined	2.76428	0.252	0.0371	0.139	|	0	<0.001	<0.001	---	|	0	20	0	4	27	0.148148	1	15	0.0666667	6	18	0.333333	0	19	0	2	11	0.181818	13	28	0.464286	9	50	0.18	10
chr11	32293321	+	A	chr11:32293321	Hba-a2	SINE	intergenic	upstream_gene_variant	0	0	32293184	137	upstream	undefined	3.42304	0.271	0.0253	0.119	|	0	<0.001	<0.001	---	|	0	19	0	2	23	0.0869565	0	14	0	6	18	0.333333	0	18	0	2	11	0.181818	16	27	0.592593	25	49	0.510204	14
chr11	32293756	+	A	chr11:32293756	Hba-a2	.	intergenic	regulatory_region_variant	0	0	-	-	-	-	1.08495	0.0101	0.00475	0.491	|	0	<0.001	<0.001	---	|	0	53	0	0	60	0	3	108	0.0277778	3	82	0.0365854	0	99	0	1	58	0.0172414	1	89	0.011236	6	75	0.08	3
chr11	32293967	+	A	chr11:32293967	Hba-a2	.	intergenic	regulatory_region_variant	0	0	-	-	-	-	2.58234	0.0115	0.00192	0.0737	|	0	<0.001	<0.001	---	|	0	174	0	6	205	0.0292683	0	291	0	1	207	0.00483092	2	266	0.0075188	8	152	0.0526316	1	149	0.00671141	0	74	0	0
chr11	32294487	+	A	chr11:32294487	Hba-a2	.	intergenic	upstream_gene_variant	0	0	-	-	-	-	3.57282	0.0119	<0.001	0.00694	|	0	<0.001	<0.001	---	|	0	89	0	5	119	0.0420168	0	144	0	1	113	0.00884956	0	116	0	0	88	0	0	161	0	2	203	0.00985222	0
chr11	32426574	+	A	chr11:32426574	Sh3pxd2b	.	UTR	3_prime_UTR_variant	0	0	-	-	-	-	-3.28641	<0.001	0.00976	0.0814	|	2.02377	0.0249	0.00611	0.367	|	1	28	0.0357143	0	0	---	5	46	0.108696	0	0	---	0	77	0	0	4	0	6	27	0.222222	0	2	0	0
chr11	35786804	+	A	chr11:35786804	Mir103-1,Pank3	SINE	UTR	3_prime_UTR_variant	0	0	-	-	-	-	-0.461565	0.0019	0.00262	0.577	|	1.41606	0.0279	0.0104	0.0759	|	1	56	0.0178571	0	86	0	1	55	0.0181818	2	42	0.047619	0	45	0	0	92	0	0	16	0	0	7	0	0
chr11	35786841	+	A	chr11:35786841	Mir103-1,Pank3	SINE	UTR	3_prime_UTR_variant	0	0	35785157	1684	upstream	intronic	-0.120857	0.00152	0.00165	0.363	|	1.74759	0.0364	0.0109	0.0428	|	0	52	0	0	67	0	0	58	0	0	45	0	1	49	0.0204082	1	81	0.0123457	0	10	0	0	14	0	0
chr11	35787877	+	A	chr11:35787877	Gm12124,Pank3	SINE	UTR	3_prime_UTR_variant	0	0	35786871	1006	upstream	UTR	-3.04457	0.00263	0.0217	0.071	|	-1.1181	0.0121	0.0262	0.181	|	7	124	0.0564516	1	99	0.010101	11	103	0.106796	0	80	0	13	125	0.104	4	122	0.0327869	0	33	0	0	42	0	0
chr11	35787910	+	A	chr11:35787910	Gm12124,Pank3	SINE	UTR	3_prime_UTR_variant	0	0	-	-	-	-	-2.38027	0.00308	0.016	0.116	|	-0.604724	0.0161	0.0244	0.0997	|	3	114	0.0263158	3	105	0.0285714	7	94	0.0744681	0	88	0	15	126	0.119048	3	100	0.03	3	41	0.0731707	0	37	0	0
chr11	35787911	+	A	chr11:35787911	Gm12124,Pank3	SINE	UTR	3_prime_UTR_variant	1	1	-	-	-	-	-3.45419	0.00495	0.0542	0.0365	|	0.356305	0.0627	0.049	0.349	|	10	118	0.0847458	3	110	0.0272727	9	99	0.0909091	1	92	0.0108696	23	129	0.178295	5	101	0.049505	5	45	0.111111	0	37	0	0
chr11	35787912	+	A	chr11:35787912	Gm12124,Pank3	SINE	UTR	3_prime_UTR_variant	0	0	35786835	1077	upstream	UTR	-3.24543	0.00401	0.038	0.038	|	1.58289	0.00964	0.00322	0.266	|	7	117	0.0598291	1	108	0.00925926	7	102	0.0686275	2	90	0.0222222	9	130	0.0692308	2	99	0.020202	3	47	0.0638298	0	37	0	0
chr11	35789325	+	A	chr11:35789325	Gm12124,Pank3	SINE	UTR	3_prime_UTR_variant	0	0	-	-	-	-	-2.21835	0.00233	0.0108	0.125	|	1.13544	0.0106	0.00482	0.143	|	10	166	0.060241	2	154	0.012987	6	99	0.0606061	0	87	0	1	118	0.00847458	2	162	0.0123457	5	95	0.0526316	0	47	0	0
chr11	35789327	+	A	chr11:35789327	Gm12124,Pank3	SINE	UTR	3_prime_UTR_variant	0	0	-	-	-	-	-3.21842	0.00308	0.0286	0.0394	|	0.819963	0.0371	0.021	0.166	|	18	165	0.109091	3	153	0.0196078	7	98	0.0714286	0	84	0	5	116	0.0431034	7	162	0.0432099	2	91	0.021978	0	47	0	0
chr11	43706402	+	A	chr11:43706402	Pwwp2a	.	UTR	3_prime_UTR_variant	0	0	-	-	-	-	-3.5909	0.0191	0.23	0.101	|	0.729295	0.00744	0.00449	0.736	|	10	26	0.384615	4	11	0.363636	4	12	0.333333	2	5	0.4	10	42	0.238095	4	12	0.333333	2	55	0.0363636	0	1	0	20
chr11	43715992	+	A	chr11:43715992	Pwwp2a	SINE	Intron	non_coding_transcript_variant	0	0	-	-	-	-	3.3726	0.0288	0.00278	0.0583	|	4.00912	0.0161	<0.001	0.0739	|	0	23	0	2	20	0.1	0	26	0	0	7	0	0	19	0	1	27	0.037037	6	13	0.461538	1	1	1	0
chr11	43715997	+	A	chr11:43715997	Pwwp2a	SINE	Intron	non_coding_transcript_variant	1	1	-	-	-	-	-2.45586	<0.001	0.00549	0.191	|	1.16299	0.0226	0.0101	0.705	|	0	23	0	0	21	0	0	27	0	0	7	0	1	22	0.0454545	0	24	0	6	10	0.6	0	1	0	0
chr11	43716014	+	A	chr11:43716014	Pwwp2a	SINE	Intron	non_coding_transcript_variant	1	1	43717733	1719	downstream	intronic	1.81045	0.0193	0.0055	0.425	|	2.58256	0.658	0.11	0.213	|	0	25	0	4	16	0.25	1	27	0.037037	0	8	0	0	24	0	6	29	0.206897	6	8	0.75	1	1	1	0
chr11	43717696	+	A	chr11:43717696	Pwwp2a	SINE	Intron	non_coding_transcript_exon_variant	0	0	43716050	1646	upstream	intronic	2.86577	0.0367	0.00503	0.129	|	1.30568	0.0658	0.0266	0.673	|	4	26	0.153846	4	19	0.210526	0	20	0	1	7	0.142857	2	19	0.105263	3	13	0.230769	0	12	0	0	13	0	0
chr11	45930592	-	T	chr11:45930592	Lsm11	SINE	UTR	3_prime_UTR_variant	0	0	45932398	1806	upstream	UTR	0	<0.001	<0.001	---	|	-0.367555	0.0118	0.0152	0.842	|	0	6	0	---	---	---	0	7	0	0	0	---	0	5	0	---	---	---	0	11	0	0	10	0	---
chr11	45930598	-	T	chr11:45930598	Lsm11	SINE	UTR	3_prime_UTR_variant	1	1	-	-	-	-	-5.74991	<0.001	0.0538	0.184	|	0.693534	0.312	0.193	0.0427	|	0	6	0	---	---	---	0	7	0	0	0	---	0	5	0	---	---	---	4	11	0.363636	0	14	0	---
chr11	45930607	-	T	chr11:45930607	Lsm11	SINE	UTR	3_prime_UTR_variant	0	0	45932376	1769	upstream	UTR	-2.21462	<0.001	0.00464	0.423	|	0.257889	0.0131	0.011	0.768	|	0	4	0	---	---	---	0	5	0	0	0	---	0	6	0	---	---	---	1	10	0.1	0	14	0	---
chr11	46272643	-	T	chr11:46272643	Cyfip2	.	Exon	missense_variant	1	1	-	-	-	-	-2.50427	0.00195	0.0111	0.295	|	0.283743	0.328	0.269	0.363	|	0	700	0	0	245	0	0	413	0	1	89	0.011236	0	563	0	1	203	0.00492611	2	125	0.016	0	33	0	5
chr11	50205338	-	T	chr11:50205338	Sqstm1	SINE	Intron	non_coding_transcript_variant	0	0	-	-	-	-	2.3415	0.00507	<0.001	0.0854	|	5.30329	0.319	0.00807	0.0453	|	0	16	0	13	199	0.0653266	0	15	0	3	141	0.0212766	0	16	0	2	164	0.0121951	0	6	0	0	20	0	0
chr11	50219910	-	T	chr11:50219910	Mgat4b	SINE	intergenic	regulatory_region_variant	0	0	50221441	1531	upstream	undefined	1.32763	0.00251	<0.001	0.363	|	1.46083	0.0487	0.0177	0.338	|	0	11	0	0	1	0	0	12	0	2	8	0.25	0	10	0	0	4	0	0	7	0	0	24	0	0
chr11	50220783	-	T	chr11:50220783	Mgat4b	SINE	intergenic	intron_variant	0	0	50221599	816	upstream	undefined	1.4943	0.00282	<0.001	0.363	|	1.01019	0.0547	0.0272	0.648	|	0	8	0	1	2	0.5	0	9	0	0	1	0	0	8	0	0	3	0	0	2	0	0	0	---	0
chr11	50295140	-	T	chr11:50295140	Canx,Maml1	.	UTR	3_prime_UTR_variant	0	0	-	-	-	-	0.645508	0.00924	0.00591	0.188	|	0.0311896	0.00312	0.00306	0.908	|	4	1018	0.00392927	5	537	0.00931099	5	809	0.00618047	2	491	0.00407332	8	1195	0.00669456	5	751	0.00665779	8	1667	0.00479904	5	1135	0.00440529	11
chr11	50295141	-	T	chr11:50295141	Canx,Maml1	.	UTR	3_prime_UTR_variant	0	0	-	-	-	-	-1.5144	0.00318	0.00909	0.0578	|	0.288202	0.00247	0.00202	0.717	|	5	1016	0.00492126	1	537	0.0018622	8	807	0.00991326	0	495	0	12	1201	0.00999167	8	748	0.0106952	15	1672	0.00897129	7	1135	0.0061674	17
chr11	51588962	-	T	chr11:51588962	Phykpl	SINE	Intron	regulatory_region_variant	0	0	-	-	-	-	1.89906	0.0076	0.00204	0.119	|	4.01654	0.214	0.0132	0.0624	|	0	10	0	1	64	0.015625	0	4	0	0	35	0	0	12	0	0	41	0	0	4	0	0	29	0	1
chr11	51588966	+	A	chr11:51588966	Phykpl	SINE	Intron	regulatory_region_variant	0	0	-	-	-	-	0	<0.001	<0.001	---	|	-1.45307	<0.001	0.00274	0.374	|	0	10	0	0	63	0	0	4	0	0	32	0	0	12	0	0	40	0	0	4	0	0	29	0	0
chr11	51593017	-	T	chr11:51593017	Phykpl	SINE	Intron	3_prime_UTR_variant	1	1	51594598	1581	upstream	intronic	0	<0.001	<0.001	---	|	6.90796	0.12	<0.001	0.000124	|	0	4	0	0	31	0	0	3	0	0	25	0	0	11	0	0	28	0	0	7	0	0	6	0	0
chr11	51593022	-	T	chr11:51593022	Phykpl	SINE	Intron	3_prime_UTR_variant	1	1	51594594	1572	upstream	intronic	1.79316	0.00347	<0.001	0.374	|	5.75847	0.142	0.00263	0.016	|	0	6	0	0	32	0	0	3	0	0	25	0	0	11	0	0	28	0	0	7	0	3	6	0.5	0
chr11	51593040	-	T	chr11:51593040	Phykpl	SINE	Intron	non_coding_transcript_exon_variant	0	0	51594575	1535	upstream	intronic	1.79316	0.00347	<0.001	0.374	|	2.30214	0.0357	0.00725	0.31	|	0	6	0	0	30	0	0	4	0	0	20	0	0	12	0	0	26	0	0	2	0	3	6	0.5	3
chr11	51596687	-	T	chr11:51596687	Hnrnpab,Phykpl	SINE	Intron	regulatory_region_variant	0	0	-	-	-	-	-4.77819	<0.001	0.0274	0.0738	|	1.00079	0.0759	0.0379	0.0572	|	0	5	0	0	30	0	2	6	0.333333	0	24	0	1	10	0.1	0	22	0	7	15	0.466667	0	13	0	0
chr11	51597835	-	T	chr11:51597835	Hnrnpab,Phykpl	SINE	Intron	regulatory_region_variant	1	1	-	-	-	-	1.06347	0.00398	0.0019	0.578	|	2.72287	0.152	0.0231	0.261	|	0	10	0	1	21	0.047619	0	18	0	1	12	0.0833333	1	21	0.047619	0	18	0	0	35	0	0	4	0	0
chr11	51597932	-	T	chr11:51597932	Hnrnpab,Phykpl	SINE	Intron	regulatory_region_variant	0	0	-	-	-	-	-4.23289	<0.001	0.0188	0.183	|	2.61222	0.0537	0.00878	0.182	|	1	2	0.5	0	20	0	0	14	0	0	12	0	0	26	0	0	27	0	0	43	0	---	---	---	2
chr11	51599256	-	T	chr11:51599256	Hnrnpab,Phykpl	SINE	Intron	regulatory_region_variant	0	0	-	-	-	-	0	<0.001	<0.001	---	|	0.289832	0.0121	0.00989	0.878	|	0	23	0	0	27	0	0	15	0	0	21	0	0	33	0	0	28	0	0	35	0	0	13	0	0
chr11	51600462	-	T	chr11:51600462	Hnrnpab,Phykpl	SINE	UTR	regulatory_region_variant	0	0	-	-	-	-	-0.0912794	0.00367	0.00391	0.924	|	0.74036	0.0817	0.0489	0.00179	|	0	221	0	0	128	0	0	241	0	0	81	0	1	298	0.0033557	4	136	0.0294118	11	746	0.0147453	0	412	0	3
chr11	51600484	-	T	chr11:51600484	Hnrnpab,Phykpl	SINE	UTR	regulatory_region_variant	0	0	-	-	-	-	-0.501428	<0.001	0.00142	0.293	|	1.35281	0.0305	0.0119	0.0187	|	0	238	0	0	139	0	0	268	0	0	88	0	2	327	0.00611621	0	152	0	1	760	0.00131579	0	466	0	0
chr11	51786454	+	A	chr11:51786454	Sar1b	SINE	Intron	intron_variant	1	1	-	-	-	-	4.19197	0.0183	<0.001	0.0257	|	0.021383	0.00719	0.00709	0.921	|	0	10	0	2	37	0.0540541	0	11	0	2	25	0.08	0	12	0	3	24	0.125	0	2	0	2	29	0.0689655	0
chr11	51987233	-	T	chr11:51987233	Gm26551,Ube2b	SINE	Intron	non_coding_transcript_variant	0	0	51988366	1133	upstream	intronic	0.746335	0.0097	0.00578	0.486	|	1.09062	0.725	0.341	0.0446	|	0	58	0	8	157	0.0509554	1	62	0.016129	1	104	0.00961538	3	72	0.0416667	5	121	0.0413223	4	72	0.0555556	3	73	0.0410959	0
chr11	51987239	-	T	chr11:51987239	Gm26551,Ube2b	SINE	Intron	non_coding_transcript_variant	0	0	51988355	1116	upstream	intronic	0	<0.001	<0.001	---	|	5.08061	0.236	0.00698	0.0609	|	0	57	0	0	154	0	0	63	0	0	103	0	0	73	0	0	121	0	0	73	0	0	67	0	0
chr11	51993251	-	T	chr11:51993251	Gm26551,Ube2b	SINE	Intron	non_coding_transcript_variant	0	0	51992240	1011	downstream	intronic	0	<0.001	<0.001	---	|	2.01016	0.0709	0.0176	0.237	|	0	37	0	0	66	0	0	23	0	0	44	0	0	39	0	0	45	0	0	7	0	0	8	0	0
chr11	51993252	-	T	chr11:51993252	Gm26551,Ube2b	SINE	Intron	non_coding_transcript_variant	0	0	51992238	1014	downstream	intronic	-0.213733	0.00168	0.00194	0.878	|	3.28121	0.0798	0.00821	0.357	|	2	37	0.0540541	0	70	0	0	23	0	1	45	0.0222222	0	41	0	0	47	0	0	7	0	0	8	0	0
chr11	51994605	-	T	chr11:51994605	Gm26551,Ube2b	SINE	Intron	non_coding_transcript_variant	0	0	51992268	2337	downstream	intronic	0	<0.001	<0.001	---	|	2.57135	0.195	0.0328	0.123	|	0	24	0	0	29	0	0	23	0	0	22	0	0	12	0	0	18	0	0	2	0	0	3	0	0
chr11	51995715	-	T	chr11:51995715	Gm26551,Ube2b	SINE	Intron	non_coding_transcript_variant	0	0	51994604	1111	downstream	intronic	3.71321	0.0131	<0.001	0.0274	|	0.976426	0.315	0.16	0.0265	|	0	106	0	4	130	0.0307692	0	129	0	3	93	0.0322581	0	132	0	6	130	0.0461538	0	100	0	2	18	0.111111	0
chr11	51995730	-	T	chr11:51995730	Gm26551,Ube2b	SINE	Intron	non_coding_transcript_variant	0	0	51994587	1143	downstream	intronic	1.01846	0.00288	0.00142	0.189	|	3.10906	0.17	0.0197	0.0325	|	1	120	0.00833333	1	133	0.0075188	0	137	0	1	102	0.00980392	0	131	0	1	128	0.0078125	0	92	0	0	28	0	0
chr11	51995757	-	T	chr11:51995757	Gm26551,Ube2b	SINE	Intron	non_coding_transcript_variant	0	0	51994563	1194	downstream	intronic	0.841154	0.00179	<0.001	0.363	|	1.78399	0.182	0.0528	0.0203	|	0	136	0	4	121	0.0330579	0	127	0	0	80	0	0	110	0	0	98	0	0	82	0	0	32	0	0
chr11	51995906	-	T	chr11:51995906	Gm12204,Gm26551,Ube2b	SINE	Intron	non_coding_transcript_variant	0	0	-	-	-	-	0	<0.001	<0.001	---	|	1.93997	0.0199	0.0052	0.133	|	0	251	0	0	238	0	0	190	0	0	105	0	0	179	0	0	188	0	0	80	0	0	19	0	0
chr11	51995907	-	T	chr11:51995907	Gm12204,Gm26551,Ube2b	SINE	Intron	non_coding_transcript_variant	0	0	-	-	-	-	0	<0.001	<0.001	---	|	2.87625	0.0145	0.00198	0.101	|	0	249	0	0	238	0	0	192	0	0	105	0	0	179	0	0	190	0	0	80	0	0	18	0	0
chr11	51995908	-	T	chr11:51995908	Gm12204,Gm26551,Ube2b	SINE	Intron	non_coding_transcript_variant	0	0	-	-	-	-	0	<0.001	<0.001	---	|	3.31896	0.0543	0.00544	0.0628	|	0	249	0	0	236	0	0	194	0	0	107	0	0	184	0	0	190	0	0	80	0	0	19	0	0
chr11	52123857	+	A	chr11:52123857	9430098F02Rik,Gm26551,Mir3061,Ppp2ca	SINE	UTR	3_prime_UTR_variant	1	1	-	-	-	-	-2.16582	0.00303	0.0136	0.475	|	0.595647	0.0035	0.00232	0.448	|	1	9	0.111111	0	25	0	4	10	0.4	0	9	0	1	7	0.142857	0	25	0	0	7	0	0	17	0	0
chr11	52123865	+	A	chr11:52123865	9430098F02Rik,Gm26551,Mir3061,Ppp2ca	SINE	UTR	3_prime_UTR_variant	1	1	-	-	-	-	0.00907463	0.00221	0.00219	0.996	|	0.652994	0.0115	0.00731	0.722	|	1	9	0.111111	0	26	0	0	13	0	0	10	0	0	10	0	3	26	0.115385	0	7	0	0	17	0	0
chr11	52125544	+	A	chr11:52125544	9430098F02Rik,Gm26551,Mir3061,Ppp2ca	SINE	UTR	3_prime_UTR_variant	0	0	52126478	934	downstream	UTR	-2.72741	0.00488	0.0323	0.118	|	1.06696	0.0071	0.00339	0.573	|	5	23	0.217391	4	37	0.108108	2	22	0.0909091	0	37	0	6	26	0.230769	6	48	0.125	0	15	0	0	6	0	0
chr11	52125549	+	A	chr11:52125549	9430098F02Rik,Gm26551,Mir3061,Ppp2ca	SINE	UTR	3_prime_UTR_variant	0	0	52126472	923	downstream	UTR	-1.36315	0.013	0.0334	0.609	|	2.66472	0.0112	0.00177	0.143	|	7	22	0.318182	0	36	0	2	21	0.0952381	3	39	0.0769231	6	27	0.222222	9	48	0.1875	0	13	0	2	6	0.333333	0
chr11	52125641	+	A	chr11:52125641	9430098F02Rik,Gm26551,Mir3061,Ppp2ca	SINE	UTR	3_prime_UTR_variant	0	0	-	-	-	-	0.786309	0.00172	<0.001	0.363	|	1.44215	0.0315	0.0116	0.476	|	0	19	0	0	58	0	0	15	0	0	40	0	0	26	0	1	38	0.0263158	0	7	0	0	7	0	0
chr11	52125654	+	A	chr11:52125654	9430098F02Rik,Gm26551,Mir3061,Ppp2ca	SINE	UTR	3_prime_UTR_variant	0	0	52123628	2026	upstream	UTR	-0.945291	0.00279	0.00537	0.68	|	-0.464134	0.00774	0.0107	0.804	|	0	19	0	1	59	0.0169492	0	12	0	1	36	0.0277778	3	25	0.12	0	36	0	0	8	0	0	10	0	3
chr11	52126806	+	A	chr11:52126806	9430098F02Rik,Gm26551,Mir3061,Ppp2ca	.	UTR	3_prime_UTR_variant	0	0	52126773	33	upstream	UTR	-0.477458	0.179	0.249	0.564	|	-0.584932	0.119	0.178	0.348	|	8	24	0.333333	5	24	0.208333	3	11	0.272727	2	18	0.111111	12	23	0.521739	7	33	0.212121	11	44	0.25	2	37	0.0540541	2
chr11	52248074	+	A	chr11:52248074	Gm26551,Skp1a,Tcf7	SINE	Intron	non_coding_transcript_variant	0	0	52247369	705	upstream	intronic	0	<0.001	<0.001	---	|	4.5502	0.0632	0.0027	0.0692	|	0	2	0	0	8	0	---	---	---	---	---	---	0	2	0	0	0	---	0	0	---	---	---	---	---
chr11	52248125	+	A	chr11:52248125	Gm26551,Skp1a,Tcf7	SINE	Intron	non_coding_transcript_variant	1	1	52247317	808	upstream	intronic	0	<0.001	<0.001	---	|	7.89832	0.239	<0.001	2.33e-05	|	0	1	0	0	11	0	0	3	0	---	---	---	0	2	0	0	0	---	4	4	1	---	---	---	---
chr11	53542541	+	A	chr11:53542541	2008-09-01	.	UTR	3_prime_UTR_variant	0	0	-	-	-	-	0	<0.001	<0.001	---	|	0.820466	0.0101	0.0057	0.68	|	0	15	0	---	---	---	0	21	0	0	3	0	0	28	0	0	2	0	0	6	0	0	4	0	0
chr11	53588105	+	A	chr11:53588105	Kif3a	SINE	Intron	intron_variant	0	0	-	-	-	-	1.99316	0.00398	<0.001	0.374	|	4.59385	0.0993	0.00411	0.0393	|	0	2	0	1	1	1	0	0	---	---	---	---	0	0	---	0	2	0	0	4	0	0	0	---	0
chr11	54718417	-	T	chr11:54718417	Cdc42se2	.	UTR	3_prime_UTR_variant	0	0	54718821	404	upstream	UTR	-3.14398	<0.001	0.00884	0.000863	|	-0.0905109	0.00175	0.00187	0.69	|	10	477	0.0209644	0	20	0	3	411	0.00729927	0	14	0	5	508	0.00984252	0	48	0	13	754	0.0172414	0	93	0	2
chr11	54723110	-	T	chr11:54723110	Cdc42se2	SINE	Intron	intron_variant	0	0	-	-	-	-	0	<0.001	<0.001	---	|	2.04235	0.0274	0.00665	0.286	|	0	13	0	0	29	0	0	13	0	0	35	0	0	11	0	0	47	0	0	7	0	0	39	0	0
chr11	54910080	+	A	chr11:54910080	Gpx3,Tnip1	.	UTR	3_prime_UTR_variant	0	0	54909715	365	upstream	UTR	-1.11218	0.0034	0.00735	0.3	|	-0.327155	0.0425	0.0534	0.435	|	0	77	0	0	35	0	0	94	0	0	25	0	4	108	0.037037	1	40	0.025	4	222	0.018018	8	129	0.0620155	5
chr11	55110583	+	A	chr11:55110583	Gm2a	.	UTR	3_prime_UTR_variant	0	0	-	-	-	-	-0.048894	0.0354	0.0367	0.831	|	-0.171381	0.0178	0.0201	0.809	|	36	910	0.0395604	10	327	0.030581	42	844	0.049763	9	336	0.0267857	51	1122	0.0454545	20	478	0.041841	88	2536	0.0347003	41	953	0.043022	55
chr11	57796351	-	T	chr11:57796351	2010001A14Rik	SINE	Exon	non_coding_transcript_exon_variant	0	0	57798133	1782	upstream	intronic	0.406086	0.00279	0.0021	0.363	|	0.655589	0.0462	0.0293	0.782	|	0	29	0	0	4	0	0	39	0	0	4	0	0	27	0	0	6	0	0	81	0	0	10	0	0
chr11	58115867	+	A	chr11:58115867	Cnot8,Gemin5	SINE	Intron	non_coding_transcript_variant	0	0	58116300	433	downstream	intronic	7.22783	0.15	<0.001	6.76e-07	|	3.81848	0.0348	0.00246	0.216	|	0	13	0	16	187	0.0855615	0	14	0	20	159	0.125786	0	31	0	16	138	0.115942	0	29	0	8	40	0.2	0
chr11	58115892	+	A	chr11:58115892	Cnot8,Gemin5	SINE	Intron	non_coding_transcript_variant	0	0	58114596	1296	upstream	intronic	5.66851	0.0509	<0.001	0.00423	|	3.26744	0.00963	<0.001	0.0713	|	0	8	0	16	134	0.119403	0	12	0	8	107	0.0747664	0	28	0	14	91	0.153846	0	20	0	3	28	0.107143	0
chr11	58115894	+	A	chr11:58115894	Cnot8,Gemin5	SINE	Intron	non_coding_transcript_variant	0	0	58114593	1301	upstream	intronic	3.91334	0.0151	<0.001	0.0271	|	0	<0.001	<0.001	---	|	0	8	0	6	128	0.046875	0	12	0	3	101	0.029703	0	26	0	0	89	0	0	20	0	2	28	0.0714286	0
chr11	58115898	+	A	chr11:58115898	Cnot8,Gemin5	SINE	Intron	non_coding_transcript_variant	0	0	58114589	1309	upstream	intronic	7.30204	0.158	<0.001	1.02e-06	|	4.17603	0.0181	<0.001	0.0202	|	0	8	0	17	121	0.140496	0	12	0	8	98	0.0816327	0	26	0	20	84	0.238095	0	20	0	5	26	0.192308	0
chr11	58116238	+	A	chr11:58116238	Cnot8,Gemin5	SINE	Intron	non_coding_transcript_variant	0	0	-	-	-	-	4.79556	0.106	0.00382	0.0101	|	4.92698	0.0304	<0.001	3.94e-05	|	1	28	0.0357143	16	163	0.0981595	2	23	0.0869565	18	122	0.147541	0	20	0	20	154	0.12987	0	39	0	16	90	0.177778	0
chr11	58116260	+	A	chr11:58116260	Cnot8,Gemin5	SINE	Intron	non_coding_transcript_variant	0	0	58115907	353	upstream	intronic	5.45067	0.154	0.00352	0.00722	|	1.78821	0.0251	0.00726	0.365	|	1	36	0.0277778	18	177	0.101695	2	29	0.0689655	23	146	0.157534	0	26	0	31	176	0.176136	0	41	0	19	96	0.197917	0
chr11	58116263	+	A	chr11:58116263	Cnot8,Gemin5	SINE	Intron	non_coding_transcript_variant	0	0	58115904	359	upstream	intronic	5.9293	0.216	0.00354	0.00398	|	2.11258	0.086	0.0199	0.278	|	1	35	0.0285714	26	173	0.150289	2	29	0.0689655	40	139	0.28777	0	26	0	46	170	0.270588	0	38	0	17	90	0.188889	0
chr11	58116264	+	A	chr11:58116264	Cnot8,Gemin5	SINE	Intron	non_coding_transcript_variant	0	0	58115903	361	upstream	intronic	6.27966	0.136	0.00175	0.00143	|	2.8263	0.00709	<0.001	0.0805	|	1	35	0.0285714	14	172	0.0813953	0	29	0	13	140	0.0928571	0	26	0	24	170	0.141176	0	38	0	16	90	0.177778	0
chr11	58116285	+	A	chr11:58116285	Cnot8,Gemin5	SINE	Intron	non_coding_transcript_variant	0	0	58115882	403	upstream	intronic	5.61071	0.187	0.00383	0.00644	|	3.29445	0.0769	0.00784	0.119	|	1	35	0.0285714	36	206	0.174757	3	27	0.111111	37	172	0.215116	0	28	0	62	210	0.295238	0	44	0	24	91	0.263736	0
chr11	58116300	+	A	chr11:58116300	Cnot8,Gemin5	SINE	Intron	non_coding_transcript_variant	0	0	58115867	433	upstream	intronic	5.15922	0.122	0.00342	0.0102	|	1.97604	0.0108	0.00274	0.314	|	2	39	0.0512821	20	220	0.0909091	1	32	0.03125	15	184	0.0815217	0	30	0	33	225	0.146667	0	46	0	18	109	0.165138	0
chr11	58324947	-	T	chr11:58324947	1700047K16Rik,Zfp672	SINE	intergenic	intron_variant	1	1	58325281	334	upstream	undefined	0	<0.001	<0.001	---	|	-1.30127	<0.001	0.00246	0.374	|	0	18	0	0	0	---	0	13	0	0	5	0	0	24	0	0	2	0	0	20	0	0	6	0	0
chr11	58324973	-	T	chr11:58324973	1700047K16Rik,Zfp672	SINE	intergenic	intron_variant	1	1	58325254	281	upstream	undefined	-1.51015	<0.001	0.00285	0.374	|	0.386211	0.574	0.439	0.0263	|	0	19	0	0	0	---	3	16	0.1875	0	4	0	0	20	0	0	0	---	0	21	0	0	2	0	0
chr11	58352651	+	A	chr11:58352651	Sh3bp5l	SINE	intergenic	regulatory_region_variant	0	0	58350752	1899	upstream	undefined	-1.3968	<0.001	0.00263	0.363	|	-2.07886	0.0155	0.0653	0.26	|	0	7	0	0	11	0	0	11	0	0	5	0	1	3	0.333333	0	4	0	0	1	0	0	1	0	0
chr11	58352902	+	A	chr11:58352902	-	SINE	intergenic	regulatory_region_variant	0	0	58352221	681	upstream	undefined	1.71015	0.00883	0.0027	0.578	|	0.20682	0.372	0.322	0.578	|	0	4	0	0	1	0	0	10	0	1	4	0.25	1	7	0.142857	0	2	0	0	0	---	3	14	0.214286	---
chr11	59199493	-	T	chr11:59199493	2610507I01Rik,Mrpl55	SINE	intergenic	downstream_gene_variant	0	0	-	-	-	-	-0.916681	0.00285	0.00538	0.509	|	-1.85015	<0.001	0.00361	0.185	|	2	662	0.00302115	8	168	0.047619	5	435	0.0114943	0	85	0	9	440	0.0204545	1	89	0.011236	0	169	0	0	8	0	0
chr11	59199548	-	T	chr11:59199548	2610507I01Rik,Mrpl55	SINE	intergenic	downstream_gene_variant	0	0	-	-	-	-	1.18007	0.00313	0.00138	0.429	|	0.349378	0.177	0.139	0.438	|	0	572	0	1	133	0.0075188	0	391	0	0	91	0	3	432	0.00694444	0	90	0	0	154	0	0	7	0	0
chr11	59199562	-	T	chr11:59199562	2610507I01Rik,Mrpl55	SINE	intergenic	downstream_gene_variant	0	0	-	-	-	-	-0.352505	0.00652	0.00832	0.763	|	0.182693	0.00233	0.00205	0.924	|	10	540	0.0185185	5	121	0.0413223	4	383	0.0104439	5	88	0.0568182	16	416	0.0384615	3	92	0.0326087	0	131	0	0	7	0	0
chr11	59199975	-	T	chr11:59199975	2610507I01Rik,Mrpl55	.	Exon	non_coding_transcript_exon_variant	0	0	-	-	-	-	-0.851125	0.00435	0.00785	0.515	|	0.788746	0.0068	0.00394	0.782	|	3	304	0.00986842	1	77	0.012987	2	236	0.00847458	0	54	0	2	288	0.00694444	1	58	0.0172414	1	135	0.00740741	1	33	0.030303	5
chr11	59206073	+	A	chr11:59206073	2310033P09Rik,2610507I01Rik,Gm10434,Mrpl55	SINE	UTR	3_prime_UTR_variant	0	0	-	-	-	-	0	<0.001	<0.001	---	|	1.27292	0.0164	0.00678	0.547	|	0	8	0	0	2	0	0	6	0	0	1	0	0	4	0	0	2	0	0	21	0	0	3	0	5
chr11	59405679	-	T	chr11:59405679	Snap47	SINE	intergenic	downstream_gene_variant	1	1	-	-	-	-	---	---	---	---	|	2.07965	0.0102	0.00242	0.431	|	0	3	0	---	---	---	---	---	---	---	---	---	---	---	---	0	0	---	---	---	---	---	---	---	---
chr11	59405695	-	T	chr11:59405695	Snap47	SINE	intergenic	downstream_gene_variant	1	1	59405157	538	downstream	undefined	---	---	---	---	|	-0.214078	0.0026	0.00302	0.374	|	0	3	0	---	---	---	---	---	---	---	---	---	---	---	---	0	0	---	---	---	---	---	---	---	---
chr11	59405704	-	T	chr11:59405704	Snap47	SINE	intergenic	downstream_gene_variant	1	1	-	-	-	-	---	---	---	---	|	2.41754	0.0737	0.0138	0.139	|	0	4	0	---	---	---	0	1	0	---	---	---	---	---	---	0	0	---	---	---	---	---	---	---	---
chr11	59456149	+	A	chr11:59456149	Jmjd4,Snap47	SINE	UTR	3_prime_UTR_variant	0	0	59458427	2278	downstream	UTR	-3.61531	<0.001	0.0123	0.182	|	1.00113	0.0241	0.012	0.632	|	1	10	0.1	---	---	---	1	4	0.25	---	---	---	2	14	0.142857	0	1	0	3	19	0.157895	0	5	0	0
chr11	59456193	+	A	chr11:59456193	Jmjd4	SINE	UTR	3_prime_UTR_variant	0	0	59458395	2202	downstream	UTR	0	<0.001	<0.001	---	|	2.42974	0.0204	0.00379	0.184	|	0	5	0	0	1	0	0	6	0	---	---	---	0	18	0	0	0	---	0	10	0	0	2	0	0
chr11	59456201	+	A	chr11:59456201	Jmjd4,Zfp867	SINE	UTR	3_prime_UTR_variant	1	1	59458385	2184	downstream	UTR	-3.17453	0.0138	0.125	0.456	|	0.498211	0.771	0.546	0.0295	|	3	5	0.6	0	1	0	4	8	0.5	---	---	---	10	20	0.5	0	0	---	5	10	0.5	0	2	0	0
chr11	59456214	+	A	chr11:59456214	Jmjd4,Zfp867	SINE	UTR	3_prime_UTR_variant	0	0	59458371	2157	downstream	UTR	-1.70656	0.00347	0.0113	0.633	|	2.70336	0.104	0.0159	0.208	|	2	4	0.5	0	2	0	3	10	0.3	---	---	---	10	27	0.37037	0	0	---	0	10	0	0	2	0	0
chr11	59456218	+	A	chr11:59456218	Jmjd4,Zfp867	SINE	UTR	3_prime_UTR_variant	1	1	59458367	2149	downstream	UTR	0	<0.001	<0.001	---	|	2.80885	0.0639	0.00912	0.137	|	0	3	0	0	2	0	0	11	0	---	---	---	0	25	0	0	0	---	0	10	0	0	2	0	0
chr11	59456242	+	A	chr11:59456242	Jmjd4,Zfp867	SINE	UTR	3_prime_UTR_variant	0	0	59458345	2103	downstream	UTR	-1.08844	<0.001	0.00213	0.374	|	2.63183	0.0182	0.00293	0.106	|	0	4	0	0	3	0	0	14	0	---	---	---	1	23	0.0434783	0	1	0	0	15	0	0	6	0	0
chr11	59456246	+	A	chr11:59456246	Jmjd4,Zfp867	SINE	UTR	3_prime_UTR_variant	1	1	59458339	2093	downstream	UTR	-4.39809	<0.001	0.0211	0.074	|	0.889941	0.369	0.199	0.137	|	1	4	0.25	0	3	0	6	14	0.428571	---	---	---	6	24	0.25	0	1	0	1	15	0.0666667	0	6	0	0
chr11	59456256	+	A	chr11:59456256	Jmjd4,Zfp867	SINE	UTR	3_prime_UTR_variant	0	0	59458330	2074	downstream	UTR	-2.36461	0.00398	0.0205	0.295	|	1.09192	0.0181	0.00851	0.643	|	1	4	0.25	0	3	0	1	14	0.0714286	---	---	---	5	23	0.217391	1	1	1	1	15	0.0666667	0	6	0	0
chr11	59456257	+	A	chr11:59456257	Jmjd4,Zfp867	SINE	UTR	3_prime_UTR_variant	1	1	59458329	2072	downstream	UTR	-2.66169	0.00356	0.0225	0.467	|	1.08862	0.173	0.0812	0.167	|	1	4	0.25	0	3	0	3	14	0.214286	---	---	---	8	23	0.347826	0	1	0	1	15	0.0666667	0	5	0	0
chr11	59456262	+	A	chr11:59456262	Jmjd4,Zfp867	SINE	UTR	3_prime_UTR_variant	0	0	59458324	2062	downstream	UTR	-1.67616	<0.001	0.0032	0.374	|	1.40187	0.0546	0.0207	0.314	|	1	3	0.333333	0	3	0	1	14	0.0714286	---	---	---	0	23	0	0	1	0	0	10	0	0	6	0	0
chr11	59456266	+	A	chr11:59456266	Jmjd4,Zfp867	SINE	UTR	3_prime_UTR_variant	1	1	59458320	2054	downstream	UTR	-0.398356	0.052	0.0686	0.871	|	1.09017	0.416	0.196	0.104	|	2	3	0.666667	0	4	0	4	14	0.285714	---	---	---	3	22	0.136364	1	1	1	1	10	0.1	4	6	0.666667	0
chr11	59456275	+	A	chr11:59456275	Jmjd4,Zfp867	SINE	UTR	3_prime_UTR_variant	0	0	59458311	2036	downstream	UTR	-4.79175	0.00367	0.102	0.136	|	1.27247	0.344	0.142	0.0317	|	3	3	1	0	4	0	8	14	0.571429	---	---	---	5	23	0.217391	0	1	0	1	10	0.1	4	6	0.666667	0
chr11	59456276	+	A	chr11:59456276	Jmjd4,Zfp867	SINE	UTR	3_prime_UTR_variant	1	1	59458308	2032	downstream	UTR	-5.96954	<0.001	0.0627	0.0171	|	0.300376	0.1	0.0813	0.649	|	1	3	0.333333	0	4	0	4	14	0.285714	---	---	---	4	23	0.173913	0	1	0	1	10	0.1	0	6	0	0
chr11	59458295	+	A	chr11:59458295	Jmjd4,Zfp867	SINE	UTR	3_prime_UTR_variant	1	1	59456289	2006	upstream	UTR	1.71745	0.00329	<0.001	0.374	|	1.3201	0.125	0.0499	0.0268	|	0	13	0	---	---	---	0	17	0	0	1	0	0	23	0	0	4	0	0	58	0	0	42	0	0
chr11	59458306	+	A	chr11:59458306	Jmjd4,Zfp867	SINE	UTR	3_prime_UTR_variant	0	0	59456279	2027	upstream	UTR	-2.2816	<0.001	0.00486	0.178	|	0.875992	0.00795	0.00433	0.483	|	0	16	0	---	---	---	1	16	0.0625	0	1	0	1	23	0.0434783	0	4	0	0	52	0	0	28	0	0
chr11	59458313	+	A	chr11:59458313	Jmjd4,Zfp867	SINE	UTR	3_prime_UTR_variant	0	0	59456272	2041	upstream	UTR	-0.685867	0.203	0.327	0.734	|	0.150123	0.878	0.791	0.115	|	4	19	0.210526	---	---	---	4	16	0.25	0	1	0	14	23	0.608696	2	4	0.5	24	51	0.470588	16	23	0.695652	8
chr11	59458314	+	A	chr11:59458314	Jmjd4,Zfp867	SINE	UTR	3_prime_UTR_variant	1	1	59456271	2043	upstream	UTR	-2.64368	0.0424	0.265	0.339	|	0.142602	0.893	0.809	0.158	|	6	19	0.315789	---	---	---	3	16	0.1875	0	1	0	13	21	0.619048	0	4	0	13	54	0.240741	3	22	0.136364	8
chr11	59458316	+	A	chr11:59458316	Jmjd4,Zfp867	SINE	UTR	3_prime_UTR_variant	0	0	59456268	2048	upstream	UTR	0.6	0.00347	0.00229	0.814	|	1.64322	0.018	0.00576	0.239	|	0	18	0	---	---	---	1	16	0.0625	0	1	0	0	23	0	2	4	0.5	0	56	0	0	23	0	0
chr11	59458319	+	A	chr11:59458319	Jmjd4,Zfp867	SINE	UTR	3_prime_UTR_variant	1	1	59456267	2052	upstream	UTR	-1.08844	<0.001	0.00213	0.374	|	-0.50046	0.0403	0.057	0.258	|	1	17	0.0588235	---	---	---	0	16	0	0	1	0	1	23	0.0434783	0	4	0	0	57	0	0	23	0	0
chr11	59458334	+	A	chr11:59458334	Jmjd4,Zfp867	SINE	UTR	3_prime_UTR_variant	1	1	59456252	2082	upstream	UTR	0	<0.001	<0.001	---	|	2.82515	0.0233	0.00329	0.0574	|	0	14	0	---	---	---	0	13	0	0	1	0	0	24	0	0	1	0	0	54	0	0	23	0	0
chr11	59458356	+	A	chr11:59458356	Jmjd4,Zfp867	SINE	UTR	3_prime_UTR_variant	0	0	59456230	2126	upstream	UTR	-0.202415	0.0141	0.0162	0.949	|	3.30158	0.0225	0.00228	0.229	|	1	15	0.0666667	---	---	---	1	10	0.1	0	1	0	2	17	0.117647	1	1	1	4	42	0.0952381	0	8	0	0
chr11	59458359	+	A	chr11:59458359	Jmjd4,Zfp867	SINE	UTR	3_prime_UTR_variant	0	0	59456227	2132	upstream	UTR	1.38119	0.0219	0.00841	0.682	|	0.0493863	0.101	0.0973	0.911	|	2	13	0.153846	---	---	---	2	8	0.25	---	---	---	0	14	0	0	1	0	2	42	0.047619	0	8	0	2
chr11	59458360	+	A	chr11:59458360	Jmjd4,Zfp867	SINE	UTR	3_prime_UTR_variant	1	1	59456226	2134	upstream	UTR	1.23495	0.0219	0.00931	0.723	|	1.64916	0.186	0.0594	0.0153	|	1	13	0.0769231	---	---	---	2	8	0.25	---	---	---	1	14	0.0714286	0	1	0	0	42	0	0	11	0	2
chr11	59458363	+	A	chr11:59458363	Jmjd4,Zfp867	SINE	UTR	3_prime_UTR_variant	1	1	59456221	2142	upstream	UTR	-2.95122	<0.001	0.00773	0.183	|	1.19631	0.0847	0.037	0.157	|	0	13	0	---	---	---	0	8	0	---	---	---	1	13	0.0769231	0	1	0	2	43	0.0465116	0	11	0	0
chr11	59458375	+	A	chr11:59458375	Jmjd4,Zfp867	SINE	UTR	3_prime_UTR_variant	1	1	59456210	2165	upstream	UTR	-3.59681	<0.001	0.0121	0.184	|	2.23738	0.115	0.0244	0.195	|	0	14	0	---	---	---	0	7	0	---	---	---	3	14	0.214286	0	1	0	4	40	0.1	0	11	0	0
chr11	59458377	+	A	chr11:59458377	Jmjd4,Zfp867	SINE	UTR	3_prime_UTR_variant	0	0	59456208	2169	upstream	UTR	0	<0.001	<0.001	---	|	0.060286	0.00166	0.00159	0.374	|	2	14	0.142857	---	---	---	0	7	0	---	---	---	0	14	0	0	1	0	0	38	0	0	11	0	0
chr11	59458378	+	A	chr11:59458378	Jmjd4,Zfp867	SINE	UTR	3_prime_UTR_variant	1	1	59456207	2171	upstream	UTR	0.973853	0.0241	0.0123	0.805	|	0.269172	0.311	0.258	0.256	|	4	14	0.285714	---	---	---	1	6	0.166667	---	---	---	3	14	0.214286	0	1	0	4	38	0.105263	4	11	0.363636	0
chr11	59458416	+	A	chr11:59458416	Jmjd4,Zfp867	SINE	UTR	3_prime_UTR_variant	1	1	-	-	-	-	-1.22672	0.00562	0.0132	0.574	|	-0.769011	0.0744	0.127	0.333	|	1	12	0.0833333	---	---	---	2	7	0.285714	---	---	---	3	12	0.25	1	1	1	3	25	0.12	0	9	0	0
chr11	59458473	+	A	chr11:59458473	Jmjd4,Zfp867	SINE	UTR	3_prime_UTR_variant	1	1	-	-	-	-	0	<0.001	<0.001	---	|	2.42575	0.0271	0.00505	0.355	|	0	4	0	---	---	---	0	4	0	---	---	---	0	2	0	0	0	---	0	6	0	0	3	0	0
chr11	60236859	-	T	chr11:60236859	Gm12265,Tom1l2	SINE	Intron	non_coding_transcript_variant	0	0	-	-	-	-	0	<0.001	<0.001	---	|	1.72877	0.00331	<0.001	0.374	|	0	8	0	---	---	---	0	8	0	0	0	---	0	12	0	0	0	---	0	0	---	0	0	---	0
chr11	60236867	-	T	chr11:60236867	Gm12265,Tom1l2	SINE	Intron	non_coding_transcript_variant	0	0	60235075	1792	downstream	intronic	0	<0.001	<0.001	---	|	3.37578	0.0278	0.00268	0.332	|	0	10	0	---	---	---	0	8	0	0	0	---	0	11	0	0	0	---	0	0	---	0	0	---	0
chr11	60444180	+	A	chr11:60444180	Gid4,Gm12268	SINE	UTR	3_prime_UTR_variant	0	0	-	-	-	-	-1.00982	<0.001	0.00201	0.363	|	1.75168	0.0285	0.00847	0.205	|	0	58	0	0	4	0	0	44	0	0	1	0	0	62	0	0	7	0	4	60	0.0666667	0	6	0	0
chr11	60444877	+	A	chr11:60444877	Gid4,Gm12267,Gm12268	.	UTR	3_prime_UTR_variant	0	0	-	-	-	-	-3.95993	<0.001	0.0156	0.00589	|	0.456154	0.00339	0.00247	0.806	|	0	92	0	0	7	0	3	75	0.04	0	2	0	3	102	0.0294118	0	6	0	2	155	0.0129032	0	13	0	1
chr11	60858322	+	A	chr11:60858322	Dhrs7b	SINE	UTR	3_prime_UTR_variant	0	0	60859550	1228	downstream	UTR	0	<0.001	<0.001	---	|	-1.86009	0.0144	0.0522	0.343	|	0	2	0	0	1	0	0	2	0	0	0	---	0	4	0	---	---	---	0	9	0	0	6	0	0
chr11	61160948	-	T	chr11:61160948	Usp22	SINE	Intron	regulatory_region_variant	0	0	61161039	91	upstream	intronic	0	<0.001	<0.001	---	|	3.468	0.0111	<0.001	0.0729	|	0	1	0	0	7	0	0	0	---	0	4	0	0	0	---	0	8	0	0	0	---	0	0	---	0
chr11	62222269	+	A	chr11:62222269	Specc1	.	UTR	regulatory_region_variant	0	0	-	-	-	-	0.743892	0.0515	0.0308	0.0335	|	-0.266515	0.00197	0.00237	0.887	|	5	375	0.0133333	11	394	0.0279188	11	691	0.015919	28	624	0.0448718	14	556	0.0251799	30	507	0.0591716	80	1429	0.0559832	75	1473	0.0509165	59
chr11	62316340	+	A	chr11:62316340	Ncor1,Ttc19	SINE	UTR	3_prime_UTR_variant	0	0	-	-	-	-	0	<0.001	<0.001	---	|	1.32491	0.0244	0.00972	0.436	|	0	152	0	0	104	0	0	113	0	0	43	0	0	152	0	0	90	0	0	75	0	0	65	0	0
chr11	62322883	+	A	chr11:62322883	Ncor1,Ttc19	SINE	Intron	non_coding_transcript_variant	1	1	62320690	2193	upstream	intronic	0.610334	0.00153	<0.001	0.363	|	1.43169	0.0027	<0.001	0.374	|	0	26	0	0	118	0	0	10	0	0	55	0	0	23	0	1	79	0.0126582	0	6	0	0	6	0	0
chr11	62322890	+	A	chr11:62322890	Ncor1,Ttc19	SINE	Intron	non_coding_transcript_variant	1	1	62320683	2207	upstream	intronic	0	<0.001	<0.001	---	|	3.34996	0.0236	0.00232	0.294	|	0	23	0	0	115	0	0	10	0	0	53	0	0	24	0	0	79	0	0	6	0	0	6	0	0
chr11	62322940	+	A	chr11:62322940	Ncor1,Ttc19	SINE	Intron	non_coding_transcript_variant	1	1	62320633	2307	upstream	intronic	0	<0.001	<0.001	---	|	-0.586158	0.0255	0.0382	0.846	|	0	27	0	0	114	0	0	9	0	0	70	0	0	30	0	0	101	0	0	4	0	0	5	0	0
chr11	62323401	+	A	chr11:62323401	Ncor1,Ttc19	SINE	Intron	non_coding_transcript_variant	1	1	-	-	-	-	1.13264	0.00219	<0.001	0.363	|	0.813152	0.422	0.24	0.208	|	0	31	0	0	164	0	0	27	0	0	48	0	0	43	0	0	91	0	0	5	0	2	18	0.111111	0
chr11	62323415	+	A	chr11:62323415	Ncor1,Ttc19	SINE	Intron	non_coding_transcript_variant	1	1	62322943	472	upstream	intronic	0	<0.001	<0.001	---	|	-0.0398618	0.002	0.00206	0.982	|	0	33	0	0	161	0	0	27	0	0	51	0	0	40	0	0	87	0	0	3	0	0	17	0	0
chr11	62325982	+	A	chr11:62325982	Ncor1,Ttc19	SINE	Intron	non_coding_transcript_variant	1	1	62328382	2400	downstream	intronic	0	<0.001	<0.001	---	|	1.21007	0.0504	0.0218	0.597	|	0	9	0	0	48	0	0	1	0	0	18	0	0	11	0	0	35	0	0	2	0	0	13	0	0
chr11	62328628	+	A	chr11:62328628	Gm12276,Ncor1,Ttc19	SINE	Intron	non_coding_transcript_variant	1	1	62328347	281	upstream	intronic	-4.12093	0.00229	0.0398	0.0453	|	-0.179559	0.162	0.184	0.593	|	1	19	0.0526316	0	27	0	5	18	0.277778	0	10	0	1	17	0.0588235	2	14	0.142857	2	28	0.0714286	0	1	0	2
chr11	67064638	+	A	chr11:67064638	Sco1	SINE	UTR	3_prime_UTR_variant	0	0	-	-	-	-	0	<0.001	<0.001	---	|	-0.152406	0.00686	0.00763	0.947	|	0	29	0	0	29	0	0	19	0	0	28	0	0	29	0	0	64	0	0	35	0	0	68	0	0
chr11	67064649	+	A	chr11:67064649	Sco1	SINE	UTR	3_prime_UTR_variant	0	0	67065283	634	downstream	UTR	-0.107309	0.00233	0.00251	0.959	|	1.51935	0.0316	0.011	0.565	|	0	29	0	0	31	0	0	19	0	4	25	0.16	0	27	0	0	61	0	0	33	0	0	64	0	6
chr11	67064667	+	A	chr11:67064667	Sco1	SINE	UTR	3_prime_UTR_variant	0	0	67065261	594	downstream	UTR	0	<0.001	<0.001	---	|	0.685979	0.0511	0.0318	0.743	|	0	25	0	0	26	0	0	16	0	0	25	0	0	18	0	0	52	0	0	29	0	0	62	0	0
chr11	68828156	-	T	chr11:68828156	Ndel1	SINE	Intron	non_coding_transcript_variant	0	0	-	-	-	-	0.481495	0.0014	<0.001	0.363	|	3.79406	0.0454	0.00327	0.163	|	0	47	0	0	200	0	0	10	0	0	110	0	0	38	0	1	135	0.00740741	0	7	0	0	55	0	0
chr11	68985936	-	T	chr11:68985936	Mir3062,Pfas	SINE	UTR	3_prime_UTR_variant	0	0	-	-	-	-	3.16874	0.193	0.0215	0.0895	|	0.426102	0.014	0.0104	0.307	|	3	38	0.0789474	1	16	0.0625	0	33	0	4	11	0.363636	0	31	0	1	7	0.142857	14	127	0.110236	4	18	0.222222	7
chr11	68985937	-	T	chr11:68985937	Mir3062,Pfas	SINE	UTR	3_prime_UTR_variant	0	0	-	-	-	-	0.14948	0.365	0.329	0.699	|	-0.798155	0.0886	0.154	0.308	|	15	38	0.394737	7	16	0.4375	6	33	0.181818	6	11	0.545455	7	32	0.21875	2	7	0.285714	43	127	0.338583	4	18	0.222222	35
chr11	68985963	-	T	chr11:68985963	Mir3062,Pfas	SINE	UTR	3_prime_UTR_variant	0	0	68986867	904	upstream	UTR	-1.44464	0.00481	0.0131	0.529	|	-0.0905024	0.00191	0.00204	0.956	|	0	32	0	0	7	0	0	25	0	1	9	0.111111	1	29	0.0344828	0	8	0	4	123	0.0325203	2	18	0.111111	4
chr11	68985970	-	T	chr11:68985970	Mir3062,Pfas	SINE	UTR	3_prime_UTR_variant	0	0	68986862	892	upstream	UTR	2.04171	0.0732	0.0178	0.0973	|	-1.08429	0.00486	0.0103	0.462	|	0	34	0	0	9	0	0	23	0	1	9	0.111111	2	28	0.0714286	1	10	0.1	6	123	0.0487805	2	18	0.111111	5
chr11	68985974	-	T	chr11:68985974	Mir3062,Pfas	SINE	UTR	3_prime_UTR_variant	0	0	68986856	882	upstream	UTR	-0.126902	0.0745	0.0814	0.95	|	0.0711035	0.0106	0.0101	0.968	|	4	36	0.111111	2	8	0.25	4	23	0.173913	4	9	0.444444	0	24	0	1	9	0.111111	17	111	0.153153	2	18	0.111111	17
chr11	68985976	-	T	chr11:68985976	Mir3062,Pfas	SINE	UTR	3_prime_UTR_variant	1	1	68986854	878	upstream	UTR	0.52943	0.287	0.199	0.32	|	0.581378	0.123	0.082	0.116	|	4	36	0.111111	3	8	0.375	4	24	0.166667	7	9	0.777778	3	25	0.12	1	9	0.111111	20	110	0.181818	4	18	0.222222	18
chr11	68985977	-	T	chr11:68985977	Mir3062,Pfas	SINE	UTR	3_prime_UTR_variant	0	0	68986852	875	upstream	UTR	-2.90486	0.0049	0.0367	0.087	|	-0.542334	0.0118	0.0172	0.646	|	1	36	0.0277778	0	8	0	2	25	0.08	0	9	0	1	27	0.037037	1	9	0.111111	3	111	0.027027	0	18	0	2
chr11	68985982	-	T	chr11:68985982	Mir3062,Pfas	SINE	UTR	3_prime_UTR_variant	1	1	68986848	866	upstream	UTR	0.38835	0.268	0.204	0.117	|	0.515431	0.192	0.134	0.0994	|	11	39	0.282051	3	8	0.375	6	29	0.206897	5	11	0.454545	3	27	0.111111	1	11	0.0909091	19	112	0.169643	4	22	0.181818	13
chr11	68986849	-	T	chr11:68986849	Mir3062,Pfas	SINE	UTR	3_prime_UTR_variant	0	0	68989334	2485	upstream	intronic	-3.87592	0.00239	0.0351	0.199	|	0.8995	0.0617	0.0331	0.705	|	11	32	0.34375	0	5	0	7	29	0.241379	0	5	0	7	32	0.21875	0	11	0	6	58	0.103448	0	18	0	0
chr11	69011670	-	T	chr11:69011670	Ctc1,Pfas	SINE	intergenic	upstream_gene_variant	0	0	-	-	-	-	0	<0.001	<0.001	---	|	0.489553	0.0158	0.0113	0.633	|	0	5	0	0	2	0	0	2	0	0	2	0	0	3	0	0	0	---	0	4	0	0	6	0	0
chr11	69035125	+	A	chr11:69035125	Ctc1	SINE	Intron	non_coding_transcript_variant	0	0	-	-	-	-	1.50304	0.00618	0.00218	0.539	|	0.0303052	0.394	0.385	0.966	|	0	6	0	2	9	0.222222	0	5	0	0	18	0	0	14	0	0	8	0	0	18	0	0	19	0	0
chr11	69402793	-	T	chr11:69402793	Kdm6b,Kdm6bos,Tmem88	SINE	Intron	intron_variant	0	0	69403290	497	upstream	intronic	6.61649	0.0981	<0.001	7.9e-06	|	5.97349	0.0628	<0.001	0.0161	|	0	15	0	8	188	0.0425532	0	7	0	7	94	0.0744681	0	19	0	18	129	0.139535	0	11	0	4	23	0.173913	0
chr11	69402801	-	T	chr11:69402801	Kdm6b,Kdm6bos,Tmem88	SINE	Intron	intron_variant	0	0	69403281	480	upstream	intronic	3.59583	0.0121	<0.001	0.0478	|	1.50127	0.00283	<0.001	0.374	|	0	15	0	2	194	0.0103093	0	7	0	2	100	0.02	0	20	0	4	132	0.030303	0	11	0	11	22	0.5	0
chr11	69402807	-	T	chr11:69402807	Kdm6b,Kdm6bos,Tmem88	SINE	Intron	intron_variant	0	0	69403276	469	upstream	intronic	3.60574	0.0122	<0.001	0.0565	|	0	<0.001	<0.001	---	|	0	14	0	1	197	0.00507614	0	7	0	8	99	0.0808081	0	20	0	2	126	0.015873	0	10	0	11	22	0.5	0
chr11	69402874	-	T	chr11:69402874	Kdm6b,Kdm6bos,Tmem88	SINE	Intron	intron_variant	0	0	69403200	326	upstream	intronic	5.64061	0.0499	<0.001	0.00469	|	7.09798	0.454	0.00331	0.0127	|	0	22	0	10	232	0.0431034	0	16	0	18	139	0.129496	0	28	0	23	158	0.14557	0	10	0	8	46	0.173913	0
chr11	69402884	-	T	chr11:69402884	Kdm6b,Kdm6bos,Tmem88	SINE	Intron	intron_variant	0	0	-	-	-	-	4.13531	0.0176	<0.001	0.0106	|	2.73296	0.00665	<0.001	0.181	|	0	23	0	6	220	0.0272727	0	15	0	2	131	0.0152672	0	27	0	1	145	0.00689655	0	11	0	6	45	0.133333	0
chr11	69402897	-	T	chr11:69402897	Kdm6b,Kdm6bos,Tmem88	SINE	Intron	intron_variant	0	0	-	-	-	-	5.06871	0.0336	<0.001	0.00567	|	5.19689	0.117	0.0032	0.201	|	0	21	0	11	194	0.056701	0	13	0	3	115	0.026087	0	28	0	11	122	0.0901639	0	8	0	6	28	0.214286	0
chr11	69404689	-	T	chr11:69404689	Kdm6b,Kdm6bos	.	Exon	synonymous_variant	0	0	-	-	-	-	-1.20192	0.00486	0.0112	0.367	|	0	<0.001	<0.001	---	|	2	206	0.00970874	1	106	0.00943396	2	131	0.0152672	2	75	0.0266667	4	189	0.021164	1	93	0.0107527	1	18	0.0555556	0	9	0	0
chr11	69623353	+	A	chr11:69623353	Sat2	SINE	Intron	non_coding_transcript_exon_variant	1	1	-	-	-	-	0	<0.001	<0.001	---	|	0.638462	0.24	0.154	0.205	|	0	1	0	---	---	---	0	0	---	0	0	---	---	---	---	---	---	---	0	0	---	0	2	0	0
chr11	69623367	+	A	chr11:69623367	Sat2	SINE	Intron	non_coding_transcript_exon_variant	0	0	-	-	-	-	0	<0.001	<0.001	---	|	1.5222	0.0447	0.0156	0.0908	|	0	1	0	---	---	---	0	0	---	0	0	---	---	---	---	---	---	---	0	0	---	0	2	0	0
chr11	69624371	+	A	chr11:69624371	Sat2	SINE	intergenic	downstream_gene_variant	0	0	69624581	210	downstream	undefined	0	<0.001	<0.001	---	|	0.992502	0.017	0.00854	0.749	|	0	0	---	---	---	---	0	0	---	0	0	---	0	0	---	---	---	---	0	0	---	---	---	---	---
chr11	69660096	-	T	chr11:69660096	Cd68,Mir1934,Mpdu1,Sox15	SINE	Intron	non_coding_transcript_variant	0	0	-	-	-	-	2.27436	0.00484	<0.001	0.176	|	3.77885	0.232	0.0169	0.0733	|	0	31	0	1	13	0.0769231	0	16	0	0	13	0	0	38	0	2	12	0.166667	0	30	0	0	12	0	0
chr11	69660097	-	T	chr11:69660097	Cd68,Mir1934,Mpdu1,Sox15	SINE	Intron	non_coding_transcript_variant	0	0	-	-	-	-	2.42178	0.00536	<0.001	0.175	|	3.89233	0.335	0.0226	0.101	|	0	31	0	0	12	0	0	16	0	2	13	0.153846	0	38	0	2	13	0.153846	0	30	0	0	14	0	0
chr11	69676530	-	T	chr11:69676530	Eif4a1,Senp3	SINE	Intron	non_coding_transcript_variant	0	0	-	-	-	-	0.859738	0.00181	<0.001	0.363	|	0.789603	0.015	0.00869	0.299	|	0	48	0	0	42	0	0	37	0	0	16	0	0	53	0	1	28	0.0357143	0	38	0	0	12	0	0
chr11	69784403	+	A	chr11:69784403	Chrnb1,Zbtb4	SINE	UTR	regulatory_region_variant	1	1	69786792	2389	downstream	intronic	0	<0.001	<0.001	---	|	-1.07616	<0.001	0.00211	0.374	|	0	4	0	0	10	0	0	14	0	0	8	0	0	22	0	0	6	0	0	101	0	0	10	0	0
chr11	69784405	+	A	chr11:69784405	Chrnb1,Zbtb4	SINE	UTR	regulatory_region_variant	1	1	69786790	2385	downstream	intronic	0	<0.001	<0.001	---	|	-1.65263	0.00302	0.00949	0.564	|	0	3	0	0	10	0	0	14	0	0	8	0	0	23	0	0	6	0	0	101	0	0	10	0	0
chr11	69938826	+	A	chr11:69938826	Slc2a4,Ybx2	DNA	Intron	intron_variant	1	1	-	-	-	-	0	<0.001	<0.001	---	|	0.358604	0.452	0.352	0.596	|	0	0	---	0	0	---	0	1	0	0	0	---	0	0	---	0	4	0	0	2	0	---	---	---	0
chr11	69974775	-	T	chr11:69974775	Elp5	SINE	Intron	non_coding_transcript_variant	0	0	-	-	-	-	-0.0145771	0.00221	0.00224	0.994	|	3.43604	0.17	0.0157	0.072	|	1	8	0.125	0	3	0	0	7	0	0	9	0	0	13	0	2	17	0.117647	0	4	0	0	0	---	0
chr11	70032075	+	A	chr11:70032075	Dlg4	SINE	Intron	intron_variant	1	1	70034465	2390	downstream	intronic	1.59179	0.00301	<0.001	0.363	|	0.21245	0.612	0.529	0.188	|	0	2	0	0	4	0	0	6	0	0	0	---	0	3	0	3	4	0.75	0	4	0	0	0	---	0
chr11	70032084	+	A	chr11:70032084	Dlg4	SINE	Intron	intron_variant	1	1	70034457	2373	downstream	intronic	1.32763	0.00251	<0.001	0.363	|	2.4496	0.0159	0.00292	0.439	|	0	2	0	0	4	0	0	6	0	0	0	---	0	3	0	1	4	0.25	0	4	0	0	0	---	0
chr11	70032124	+	A	chr11:70032124	Dlg4	SINE	Intron	intron_variant	1	1	70034413	2289	downstream	intronic	1.19307	0.00229	<0.001	0.363	|	1.19406	0.471	0.206	0.0252	|	0	3	0	0	2	0	0	3	0	0	0	---	0	1	0	1	7	0.142857	0	7	0	0	0	---	0
chr11	70032158	+	A	chr11:70032158	Dlg4	SINE	Intron	intron_variant	0	0	70033976	1818	downstream	intronic	0	<0.001	<0.001	---	|	1.43865	0.0993	0.0367	0.371	|	0	2	0	0	0	---	0	4	0	0	0	---	0	1	0	0	7	0	0	7	0	0	0	---	0
chr11	70032341	+	A	chr11:70032341	Dlg4	SINE	Intron	intron_variant	0	0	-	-	-	-	0	<0.001	<0.001	---	|	-0.2	0.00204	0.00235	0.374	|	0	2	0	0	1	0	0	3	0	0	0	---	0	7	0	0	0	---	0	9	0	0	0	---	0
chr11	70033941	+	A	chr11:70033941	Dlg4	SINE	Intron	intron_variant	0	0	-	-	-	-	0.333333	0.00316	0.00251	0.892	|	-0.231034	0.0201	0.0236	0.924	|	0	0	---	0	0	---	1	4	0.25	0	0	---	0	3	0	0	1	0	0	7	0	0	8	0	0
chr11	70033980	+	A	chr11:70033980	Dlg4	SINE	Intron	intron_variant	0	0	70033163	817	upstream	intronic	-1.44064	<0.001	0.00271	0.363	|	2.68913	0.175	0.0272	0.246	|	0	0	---	0	0	---	0	5	0	0	0	---	0	6	0	0	1	0	2	5	0.4	0	8	0	0
chr11	70033985	+	A	chr11:70033985	Dlg4	SINE	Intron	intron_variant	0	0	70033155	830	upstream	intronic	0	<0.001	<0.001	---	|	-1.12306	0.00289	0.00628	0.399	|	0	0	---	0	0	---	0	5	0	0	0	---	0	6	0	0	1	0	0	5	0	0	8	0	0
chr11	70035822	+	A	chr11:70035822	Dlg4	SINE	Intron	intron_variant	1	1	-	-	-	-	0	<0.001	<0.001	---	|	2.64623	0.00626	<0.001	0.179	|	0	6	0	0	1	0	0	3	0	0	2	0	0	3	0	0	4	0	0	0	---	0	2	0	0
chr11	70035943	+	A	chr11:70035943	Dlg4	SINE	Intron	intron_variant	0	0	-	-	-	-	0	<0.001	<0.001	---	|	3.79405	0.262	0.0189	0.0845	|	0	2	0	0	1	0	0	2	0	0	1	0	0	3	0	0	3	0	0	0	---	0	0	---	0
chr11	70035957	+	A	chr11:70035957	Dlg4	SINE	Intron	intron_variant	0	0	-	-	-	-	0	<0.001	<0.001	---	|	1.21178	0.00232	<0.001	0.374	|	0	1	0	0	1	0	0	3	0	0	1	0	0	3	0	0	3	0	0	0	---	0	0	---	0
chr11	70035986	+	A	chr11:70035986	Dlg4	SINE	Intron	intron_variant	1	1	-	-	-	-	0	<0.001	<0.001	---	|	1.96805	0.103	0.0263	0.553	|	0	1	0	0	1	0	0	2	0	0	0	---	0	2	0	0	2	0	0	0	---	0	0	---	0
chr11	70035987	+	A	chr11:70035987	Dlg4	SINE	Intron	intron_variant	0	0	-	-	-	-	0	<0.001	<0.001	---	|	0.637635	0.124	0.0799	0.838	|	0	1	0	0	1	0	0	2	0	0	0	---	0	2	0	0	2	0	0	0	---	0	0	---	0
chr11	70035991	+	A	chr11:70035991	Dlg4	SINE	Intron	intron_variant	0	0	70037180	1189	downstream	intronic	0	<0.001	<0.001	---	|	4.54436	0.0773	0.00331	0.126	|	0	1	0	0	1	0	0	2	0	0	0	---	0	2	0	0	2	0	0	0	---	0	0	---	0
chr11	70037039	+	A	chr11:70037039	Dlg4	SINE	Intron	intron_variant	0	0	-	-	-	-	0	<0.001	<0.001	---	|	1.98046	0.0581	0.0147	0.535	|	0	6	0	0	0	---	0	2	0	0	1	0	0	4	0	0	1	0	0	0	---	0	0	---	0
chr11	70037043	+	A	chr11:70037043	Dlg4	SINE	Intron	intron_variant	1	1	-	-	-	-	0	<0.001	<0.001	---	|	0.277275	0.793	0.654	0.355	|	0	5	0	0	0	---	0	2	0	0	0	---	0	4	0	0	1	0	0	0	---	0	0	---	0
chr11	70037118	+	A	chr11:70037118	Dlg4	SINE	Intron	intron_variant	1	1	-	-	-	-	0	<0.001	<0.001	---	|	1.71982	0.0279	0.00848	0.607	|	0	8	0	0	0	---	0	2	0	0	0	---	0	4	0	0	0	---	0	0	---	0	0	---	0
chr11	70037127	+	A	chr11:70037127	Dlg4	SINE	Intron	intron_variant	1	1	70036043	1084	upstream	intronic	-1.66096	<0.001	0.00316	0.363	|	-1.0757	0.0443	0.0934	0.0856	|	0	7	0	0	0	---	0	2	0	0	0	---	0	4	0	0	0	---	0	0	---	0	0	---	6
chr11	70046476	+	A	chr11:70046476	Dlg4	SINE	intergenic	downstream_gene_variant	1	1	-	-	-	-	0	<0.001	<0.001	---	|	1.09725	0.304	0.142	0.129	|	0	2	0	---	---	---	0	1	0	0	0	---	0	0	---	0	1	0	0	2	0	0	2	0	0
chr11	70046478	+	A	chr11:70046478	Dlg4	SINE	intergenic	downstream_gene_variant	0	0	-	-	-	-	0	<0.001	<0.001	---	|	0.929493	0.229	0.12	0.185	|	0	2	0	---	---	---	0	1	0	0	0	---	0	0	---	0	1	0	0	2	0	0	2	0	0
chr11	70643416	-	T	chr11:70643416	Gp1ba,Rnf167,Slc25a11	SINE	intergenic	downstream_gene_variant	0	0	70644115	699	upstream	undefined	-1.08439	0.00282	0.00597	0.687	|	-2.20285	0.00653	0.0301	0.242	|	2	11	0.181818	0	6	0	1	4	0.25	0	6	0	0	5	0	0	0	---	0	5	0	3	6	0.5	0
chr11	70643446	-	T	chr11:70643446	Gp1ba,Rnf167,Slc25a11	SINE	intergenic	downstream_gene_variant	0	0	70644083	637	upstream	undefined	0.285708	0.00794	0.00651	0.931	|	-0.324465	0.00432	0.00541	0.905	|	4	15	0.266667	0	8	0	2	7	0.285714	0	6	0	0	5	0	2	4	0.5	0	5	0	3	6	0.5	0
chr11	70643458	-	T	chr11:70643458	Gp1ba,Rnf167,Slc25a11	SINE	intergenic	downstream_gene_variant	0	0	70642842	616	downstream	intergenic	0	<0.001	<0.001	---	|	2.95216	0.0297	0.00384	0.251	|	0	18	0	0	7	0	0	10	0	0	4	0	0	6	0	0	4	0	0	7	0	0	4	0	0
chr11	70643471	-	T	chr11:70643471	Gp1ba,Rnf167,Slc25a11	SINE	intergenic	downstream_gene_variant	0	0	-	-	-	-	2.6313	0.186	0.0299	0.347	|	-0.0124648	0.552	0.557	0.972	|	3	21	0.142857	2	7	0.285714	1	9	0.111111	0	5	0	4	11	0.363636	5	6	0.833333	0	7	0	3	5	0.6	0
chr11	70643476	-	T	chr11:70643476	Gp1ba,Rnf167,Slc25a11	SINE	intergenic	downstream_gene_variant	0	0	-	-	-	-	1.90166	0.0195	0.00521	0.201	|	1.30564	0.328	0.133	0.079	|	2	20	0.1	2	7	0.285714	0	9	0	0	5	0	2	10	0.2	4	6	0.666667	0	7	0	0	2	0	0
chr11	70643487	-	T	chr11:70643487	Gp1ba,Rnf167,Slc25a11	SINE	intergenic	downstream_gene_variant	0	0	70643753	266	upstream	undefined	-0.899321	0.00251	0.00468	0.476	|	-0.92962	0.00693	0.0132	0.713	|	2	19	0.105263	2	8	0.25	1	10	0.1	0	4	0	0	7	0	0	7	0	0	9	0	0	2	0	0
chr11	70643499	-	T	chr11:70643499	Gp1ba,Rnf167,Slc25a11	SINE	intergenic	downstream_gene_variant	0	0	70643741	242	upstream	undefined	-2.50474	0.0668	0.379	0.183	|	-0.000887092	0.744	0.744	0.997	|	9	21	0.428571	4	11	0.363636	3	12	0.25	0	5	0	2	7	0.285714	6	7	0.857143	1	8	0.125	0	2	0	3
chr11	70643505	-	T	chr11:70643505	Gp1ba,Rnf167,Slc25a11	SINE	intergenic	downstream_gene_variant	0	0	70643735	230	upstream	undefined	-2.43127	0.0209	0.113	0.156	|	0.0795723	0.246	0.233	0.861	|	10	22	0.454545	3	12	0.25	2	16	0.125	0	6	0	4	10	0.4	6	8	0.75	1	8	0.125	0	2	0	0
chr11	70643520	-	T	chr11:70643520	Gp1ba,Rnf167,Slc25a11	SINE	intergenic	downstream_gene_variant	0	0	70644041	521	upstream	undefined	-1.84466	0.00515	0.0185	0.258	|	-2.15233	<0.001	0.00445	0.181	|	2	21	0.0952381	1	16	0.0625	1	13	0.0769231	0	7	0	1	14	0.0714286	3	10	0.3	1	13	0.0769231	0	2	0	0
chr11	70643743	-	T	chr11:70643743	Gp1ba,Rnf167,Slc25a11	SINE	intergenic	downstream_gene_variant	0	0	70643499	244	downstream	undefined	0.551739	0.0289	0.0197	0.843	|	-0.800322	0.0882	0.154	0.299	|	4	20	0.2	1	9	0.111111	5	5	1	0	6	0	7	24	0.291667	2	12	0.166667	0	18	0	1	8	0.125	0
chr11	70643747	-	T	chr11:70643747	Gp1ba,Rnf167,Slc25a11	SINE	intergenic	downstream_gene_variant	0	0	70643494	253	downstream	undefined	-1.1712	<0.001	0.00225	0.363	|	1.95499	0.171	0.044	0.294	|	0	22	0	0	9	0	0	5	0	0	5	0	3	23	0.130435	0	10	0	0	15	0	0	8	0	0
chr11	70643757	-	T	chr11:70643757	Gp1ba,Rnf167,Slc25a11	SINE	intergenic	downstream_gene_variant	0	0	70643483	274	downstream	undefined	-1.98603	0.00637	0.0252	0.475	|	0.616441	0.502	0.328	0.244	|	2	23	0.0869565	0	11	0	1	5	0.2	0	4	0	6	27	0.222222	0	10	0	1	15	0.0666667	4	10	0.4	0
chr11	70643762	-	T	chr11:70643762	Gp1ba,Rnf167,Slc25a11	SINE	intergenic	downstream_gene_variant	0	0	70643479	283	downstream	undefined	1.78516	0.102	0.0297	0.542	|	1.06429	0.38	0.182	0.364	|	3	22	0.136364	1	11	0.0909091	2	5	0.4	0	4	0	5	22	0.227273	4	9	0.444444	1	18	0.0555556	1	10	0.1	0
chr11	70643763	-	T	chr11:70643763	Gp1ba,Rnf167,Slc25a11	SINE	intergenic	downstream_gene_variant	1	1	70643478	285	downstream	undefined	2.0264	0.155	0.038	0.496	|	-0.00489437	0.635	0.638	0.989	|	9	22	0.409091	2	11	0.181818	2	5	0.4	0	4	0	7	21	0.333333	4	9	0.444444	1	18	0.0555556	6	10	0.6	0
chr11	70643764	-	T	chr11:70643764	Gp1ba,Rnf167,Slc25a11	SINE	intergenic	downstream_gene_variant	0	0	70643478	286	downstream	undefined	-3.16886	<0.001	0.00899	0.0801	|	1.65471	0.0301	0.00956	0.452	|	0	22	0	0	11	0	1	5	0.2	0	4	0	1	21	0.047619	0	9	0	1	18	0.0555556	0	10	0	0
chr11	70643766	-	T	chr11:70643766	Gp1ba,Rnf167,Slc25a11	SINE	intergenic	downstream_gene_variant	0	0	-	-	-	-	-0.0745765	0.0146	0.0153	0.98	|	1.38711	0.236	0.0904	0.0122	|	6	22	0.272727	0	11	0	1	6	0.166667	0	4	0	6	21	0.285714	2	9	0.222222	0	18	0	3	10	0.3	0
chr11	70643771	-	T	chr11:70643771	Gp1ba,Rnf167,Slc25a11	SINE	intergenic	downstream_gene_variant	0	0	-	-	-	-	0.124771	0.0392	0.0359	0.958	|	0.263908	0.793	0.661	0.374	|	7	23	0.304348	1	11	0.0909091	2	6	0.333333	0	4	0	8	21	0.380952	2	9	0.222222	1	18	0.0555556	5	10	0.5	0
chr11	70643781	-	T	chr11:70643781	Gp1ba,Rnf167,Slc25a11	SINE	intergenic	downstream_gene_variant	0	0	-	-	-	-	-2.19855	0.00212	0.00973	0.198	|	4.2695	0.0692	0.00359	0.0182	|	2	21	0.0952381	0	10	0	1	7	0.142857	0	6	0	0	22	0	0	4	0	1	16	0.0625	1	11	0.0909091	0
chr11	70643782	-	T	chr11:70643782	Gp1ba,Rnf167,Slc25a11	SINE	intergenic	downstream_gene_variant	0	0	-	-	-	-	-0.568328	0.017	0.0252	0.832	|	1.90825	0.198	0.0527	0.296	|	3	21	0.142857	1	10	0.1	1	8	0.125	0	6	0	5	22	0.227273	0	4	0	1	16	0.0625	6	11	0.545455	0
chr11	70643796	-	T	chr11:70643796	Gp1ba,Rnf167,Slc25a11	SINE	intergenic	downstream_gene_variant	0	0	-	-	-	-	0.155481	0.00212	0.0019	0.925	|	1.4483	0.0244	0.00893	0.552	|	1	21	0.047619	0	8	0	0	9	0	0	5	0	0	26	0	0	3	0	0	14	0	1	11	0.0909091	0
chr11	70643832	-	T	chr11:70643832	Gp1ba,Rnf167,Slc25a11	SINE	intergenic	downstream_gene_variant	1	1	-	-	-	-	0.621285	0.0199	0.013	0.842	|	0.0129917	0.568	0.563	0.882	|	4	19	0.210526	0	6	0	4	17	0.235294	0	9	0	2	21	0.0952381	3	4	0.75	0	8	0	6	12	0.5	0
chr11	72163066	-	T	chr11:72163066	4933427D14Rik	SINE	Intron	regulatory_region_variant	1	1	72163871	805	upstream	intronic	0	<0.001	<0.001	---	|	0.623095	0.00295	0.00191	0.772	|	0	11	0	0	10	0	0	0	---	0	10	0	0	5	0	0	2	0	0	4	0	0	1	0	0
chr11	72163070	-	T	chr11:72163070	4933427D14Rik	SINE	Intron	regulatory_region_variant	1	1	72163865	795	upstream	intronic	1.66096	0.00316	<0.001	0.363	|	1.09787	0.269	0.126	0.0769	|	0	10	0	0	10	0	0	0	---	0	10	0	0	6	0	0	2	0	0	4	0	1	1	1	0
chr11	72163078	-	T	chr11:72163078	4933427D14Rik	SINE	Intron	regulatory_region_variant	1	1	72163858	780	upstream	intronic	1.66096	0.00316	<0.001	0.363	|	2.00661	0.0811	0.0202	0.159	|	0	7	0	0	9	0	0	1	0	0	10	0	0	7	0	0	3	0	0	3	0	0	1	0	0
chr11	72164066	-	T	chr11:72164066	4933427D14Rik	SINE	Intron	non_coding_transcript_variant	0	0	-	-	-	-	0	<0.001	<0.001	---	|	1.51065	0.00587	0.00206	0.535	|	0	0	---	0	3	0	0	0	---	---	---	---	0	3	0	0	1	0	0	2	0	0	3	0	0
chr11	72209575	-	T	chr11:72209575	4933427D14Rik,Gm43951,Med31,Txndc17	SINE	UTR	3_prime_UTR_variant	0	0	-	-	-	-	0.392531	0.00128	0.000978	0.32	|	-0.258119	0.000734	0.000878	0.443	|	0	466	0	0	180	0	0	467	0	0	105	0	0	593	0	1	223	0.0044843	1	1141	0.000876424	0	376	0	0
chr11	72212809	-	T	chr11:72212809	4930563E22Rik,Med31,Txndc17	SINE	Intron	intron_variant	0	0	72213114	305	upstream	intronic	4.29988	0.0197	<0.001	0.0291	|	2.00494	0.00401	<0.001	0.178	|	0	17	0	1	37	0.027027	0	14	0	2	24	0.0833333	0	17	0	0	29	0	0	25	0	7	30	0.233333	0
chr11	72212814	-	T	chr11:72212814	4930563E22Rik,Med31,Txndc17	SINE	Intron	intron_variant	0	0	72213107	293	upstream	intronic	5.27232	0.0386	<0.001	0.00656	|	3.20367	0.0211	0.00229	0.237	|	0	17	0	2	39	0.0512821	0	15	0	2	23	0.0869565	0	17	0	1	31	0.0322581	0	22	0	12	28	0.428571	0
chr11	72212821	-	T	chr11:72212821	4930563E22Rik,Med31,Txndc17	SINE	Intron	intron_variant	0	0	72213101	280	upstream	intronic	4.02072	0.0162	<0.001	0.0285	|	2.00584	0.00402	<0.001	0.178	|	0	15	0	1	36	0.0277778	0	15	0	0	24	0	0	18	0	2	31	0.0645161	0	23	0	5	28	0.178571	0
chr11	72212843	-	T	chr11:72212843	4930563E22Rik,Med31,Txndc17	SINE	Intron	intron_variant	0	0	-	-	-	-	5.97944	0.0631	<0.001	0.00479	|	7.01831	0.13	<0.001	1.48e-05	|	0	13	0	4	37	0.108108	0	17	0	2	26	0.0769231	0	17	0	5	28	0.178571	0	18	0	13	34	0.382353	0
chr11	72212919	-	T	chr11:72212919	4930563E22Rik,Med31,Txndc17	SINE	Intron	intron_variant	0	0	-	-	-	-	2.67716	0.047	0.00735	0.349	|	5.03149	0.091	0.00278	0.021	|	0	8	0	5	46	0.108696	0	9	0	2	34	0.0588235	0	26	0	5	35	0.142857	6	19	0.315789	6	26	0.230769	1
chr11	72213164	-	T	chr11:72213164	4930563E22Rik,Med31,Txndc17	SINE	Intron	intron_variant	0	0	72212753	411	downstream	intronic	1.71175	0.00706	0.00215	0.241	|	0.983032	0.235	0.119	0.0206	|	0	6	0	1	22	0.0454545	0	6	0	1	16	0.0625	1	10	0.1	1	23	0.0434783	0	12	0	0	0	---	0
chr11	72213165	-	T	chr11:72213165	4930563E22Rik,Med31,Txndc17	SINE	Intron	intron_variant	0	0	72212753	412	downstream	intronic	1.75559	0.00792	0.00235	0.459	|	1.16636	0.43	0.192	0.0349	|	0	6	0	2	22	0.0909091	0	6	0	1	16	0.0625	0	10	0	1	23	0.0434783	2	12	0.166667	0	0	---	0
chr11	72213171	-	T	chr11:72213171	4930563E22Rik,Med31,Txndc17	SINE	Intron	intron_variant	0	0	72213592	421	upstream	Intron	0.940643	0.00192	<0.001	0.363	|	4.57861	0.166	0.00694	0.0742	|	0	5	0	1	20	0.05	0	4	0	0	14	0	0	10	0	0	18	0	0	7	0	0	0	---	0
chr11	72796321	+	A	chr11:72796321	Cyb5d2,Gm22075,Zzef1	.	Exon	missense_variant	0	0	-	-	-	-	0	<0.001	<0.001	---	|	3.2149	0.138	0.0149	0.0684	|	0	29	0	0	62	0	0	17	0	0	48	0	0	26	0	0	69	0	0	4	0	0	25	0	0
chr11	74386294	-	T	chr11:74386294	Rap1gap2	.	UTR	3_prime_UTR_variant	0	0	-	-	-	-	-0.817544	0.00282	0.00497	0.731	|	4.35581	0.0702	0.00343	0.00785	|	1	208	0.00480769	0	54	0	0	163	0	0	35	0	4	151	0.0264901	0	50	0	0	24	0	0	14	0	0
chr11	74920261	-	T	chr11:74920261	Srr	SINE	Intron	non_coding_transcript_variant	0	0	74922088	1827	upstream	intronic	0	<0.001	<0.001	---	|	-0.0526069	0.00257	0.00266	0.982	|	0	4	0	0	4	0	0	3	0	0	0	---	0	14	0	0	0	---	0	1	0	0	0	---	0
chr11	75176340	-	T	chr11:75176340	1700016P03Rik,Dph1,Mir132,Mir212,Ovca2	.	UTR	3_prime_UTR_variant	1	1	75177457	1117	upstream	UTR	0.236958	0.0733	0.0622	0.892	|	0.288531	0.149	0.122	0.425	|	0	27	0	1	11	0.0909091	2	37	0.0540541	0	2	0	12	40	0.3	1	13	0.0769231	16	84	0.190476	28	84	0.333333	14
chr11	75176344	-	T	chr11:75176344	1700016P03Rik,Dph1,Mir132,Mir212,Ovca2	.	UTR	3_prime_UTR_variant	0	0	-	-	-	-	-0.0411259	0.595	0.612	0.882	|	-0.0248901	0.508	0.516	0.748	|	15	27	0.555556	9	11	0.818182	24	36	0.666667	1	1	1	26	39	0.666667	4	12	0.333333	55	79	0.696203	39	84	0.464286	29
chr11	75176345	-	T	chr11:75176345	1700016P03Rik,Dph1,Mir132,Mir212,Ovca2	.	UTR	3_prime_UTR_variant	1	1	-	-	-	-	-1.232	0.153	0.36	0.427	|	-0.339042	0.147	0.186	0.17	|	7	28	0.25	4	11	0.363636	12	37	0.324324	0	1	0	17	38	0.447368	5	12	0.416667	29	82	0.353659	34	84	0.404762	25
chr11	75176346	-	T	chr11:75176346	1700016P03Rik,Dph1,Mir132,Mir212,Ovca2	.	UTR	3_prime_UTR_variant	0	0	-	-	-	-	-0.917001	0.0248	0.0469	0.679	|	-0.546572	0.0167	0.0244	0.603	|	0	28	0	2	11	0.181818	1	37	0.027027	0	1	0	4	37	0.108108	0	12	0	11	85	0.129412	5	85	0.0588235	4
chr11	75176347	-	T	chr11:75176347	1700016P03Rik,Dph1,Mir132,Mir212,Ovca2	.	UTR	3_prime_UTR_variant	0	0	-	-	-	-	-3.0554	<0.001	0.00831	0.0274	|	2.41547	0.0246	0.00461	0.0717	|	1	28	0.0357143	0	11	0	0	37	0	0	1	0	1	38	0.0263158	0	12	0	1	85	0.0117647	0	85	0	2
chr11	75176366	-	T	chr11:75176366	1700016P03Rik,Dph1,Mir132,Mir212,Ovca2	.	UTR	3_prime_UTR_variant	0	0	-	-	-	-	-0.966806	0.00153	0.00299	0.27	|	1.1589	0.0194	0.00868	0.459	|	0	26	0	0	10	0	0	43	0	0	3	0	0	49	0	0	10	0	3	115	0.026087	1	78	0.0128205	2
chr11	75176383	-	T	chr11:75176383	1700016P03Rik,Dph1,Mir132,Mir212,Ovca2	.	UTR	3_prime_UTR_variant	0	0	-	-	-	-	-0.541615	0.00181	0.00263	0.373	|	-0.253309	0.0217	0.0258	0.777	|	0	28	0	0	14	0	0	46	0	0	3	0	0	55	0	0	14	0	0	115	0	0	77	0	3
chr11	75176384	-	T	chr11:75176384	1700016P03Rik,Dph1,Mir132,Mir212,Ovca2	.	UTR	3_prime_UTR_variant	1	1	-	-	-	-	-3.98321	0.0129	0.204	0.0512	|	-0.36636	0.0857	0.11	0.541	|	3	27	0.111111	0	15	0	8	45	0.177778	0	3	0	14	54	0.259259	0	13	0	24	113	0.212389	13	71	0.183099	18
chr11	75176391	-	T	chr11:75176391	1700016P03Rik,Dph1,Mir132,Mir212,Ovca2	.	UTR	3_prime_UTR_variant	0	0	-	-	-	-	-0.0344085	0.00201	0.00206	0.984	|	0.9514	0.0178	0.00919	0.616	|	0	26	0	1	15	0.0666667	0	43	0	0	3	0	4	52	0.0769231	0	13	0	0	119	0	0	70	0	0
chr11	75176432	-	T	chr11:75176432	1700016P03Rik,Dph1,Mir132,Mir212,Ovca2	.	UTR	3_prime_UTR_variant	1	1	75177357	925	upstream	UTR	-0.751736	0.187	0.315	0.0083	|	-0.0345751	0.156	0.16	0.916	|	8	37	0.216216	3	18	0.166667	9	49	0.183673	1	8	0.125	18	56	0.321429	3	18	0.166667	37	119	0.310924	14	52	0.269231	37
chr11	75176447	-	T	chr11:75176447	1700016P03Rik,Dph1,Mir132,Mir212,Ovca2	.	UTR	3_prime_UTR_variant	0	0	75177342	895	upstream	UTR	-1.18865	0.00235	0.00536	0.574	|	3.24713	0.0359	0.00378	0.00349	|	0	37	0	0	18	0	2	48	0.0416667	0	11	0	1	57	0.0175439	0	19	0	4	123	0.0325203	0	47	0	0
chr11	75177351	-	T	chr11:75177351	1700016P03Rik,Dph1,Mir132,Mir212,Ovca2	.	UTR	3_prime_UTR_variant	0	0	75178261	910	upstream	UTR	-1.42321	<0.001	0.00268	0.176	|	1.48125	0.0204	0.00732	0.302	|	0	41	0	0	19	0	1	42	0.0238095	0	11	0	1	64	0.015625	0	17	0	0	71	0	0	20	0	0
chr11	75177359	-	T	chr11:75177359	1700016P03Rik,Dph1,Mir132,Mir212,Ovca2	.	UTR	3_prime_UTR_variant	0	0	75176430	929	downstream	UTR	2.85935	0.0129	0.00178	0.103	|	2.02965	0.0137	0.00336	0.244	|	0	38	0	1	19	0.0526316	0	39	0	0	13	0	2	62	0.0322581	5	17	0.294118	0	67	0	0	24	0	0
chr11	75177363	-	T	chr11:75177363	1700016P03Rik,Dph1,Mir132,Mir212,Ovca2	.	UTR	3_prime_UTR_variant	0	0	75176426	937	downstream	UTR	-1.58186	0.111	0.333	0.235	|	0.489271	0.183	0.13	0.0882	|	13	37	0.351351	3	18	0.166667	20	35	0.571429	3	11	0.272727	17	55	0.309091	10	17	0.588235	37	69	0.536232	11	27	0.407407	7
chr11	75177367	-	T	chr11:75177367	1700016P03Rik,Dph1,Mir132,Mir212,Ovca2	.	UTR	3_prime_UTR_variant	0	0	-	-	-	-	0.181732	0.148	0.131	0.714	|	0.0109159	0.0417	0.0414	0.988	|	2	37	0.0540541	1	14	0.0714286	3	34	0.0882353	1	11	0.0909091	7	54	0.12963	9	17	0.529412	27	74	0.364865	6	26	0.230769	3
chr11	75177424	-	T	chr11:75177424	1700016P03Rik,Dph1,Mir132,Mir212,Ovca2	.	UTR	3_prime_UTR_variant	0	0	-	-	-	-	-1.73456	0.00233	0.00775	0.351	|	0.576074	0.0582	0.0391	0.389	|	0	57	0	0	16	0	0	56	0	0	31	0	8	64	0.125	0	34	0	2	117	0.017094	4	25	0.16	0
chr11	75177441	-	T	chr11:75177441	1700016P03Rik,Dph1,Mir132,Mir212,Ovca2	.	UTR	3_prime_UTR_variant	0	0	-	-	-	-	0	<0.001	<0.001	---	|	0.679259	0.0184	0.0115	0.458	|	0	51	0	0	17	0	0	53	0	0	32	0	0	62	0	0	37	0	0	112	0	0	31	0	0
chr11	75177459	-	T	chr11:75177459	1700016P03Rik,Dph1,Mir132,Mir212,Ovca2	SINE	UTR	3_prime_UTR_variant	1	1	-	-	-	-	-0.257435	0.00973	0.0116	0.832	|	0.447226	0.0685	0.0502	0.298	|	1	46	0.0217391	2	17	0.117647	1	51	0.0196078	2	32	0.0625	3	62	0.0483871	0	34	0	12	100	0.12	3	26	0.115385	0
chr11	75177471	-	T	chr11:75177471	1700016P03Rik,Dph1,Mir132,Mir212,Ovca2	SINE	UTR	3_prime_UTR_variant	1	1	75176324	1147	downstream	UTR	-2.12164	0.00508	0.0221	0.389	|	0.0811793	0.121	0.115	0.84	|	3	45	0.0666667	0	18	0	6	48	0.125	0	32	0	5	61	0.0819672	0	34	0	17	100	0.17	3	27	0.111111	0
chr11	75300537	-	T	chr11:75300537	Rpa1	.	UTR	3_prime_UTR_variant	0	0	75301054	517	upstream	UTR	0.545184	0.00184	0.00126	0.609	|	0.0388382	0.0124	0.0121	0.976	|	0	86	0	0	29	0	0	96	0	0	30	0	0	134	0	0	31	0	2	502	0.00398406	0	130	0	0
chr11	75300545	-	T	chr11:75300545	Rpa1	.	UTR	3_prime_UTR_variant	0	0	75301045	500	upstream	UTR	0.145019	0.0241	0.0218	0.919	|	-0.645534	0.00754	0.0118	0.624	|	1	113	0.00884956	6	39	0.153846	2	118	0.0169492	6	33	0.181818	7	168	0.0416667	1	37	0.027027	11	566	0.0194346	1	144	0.00694444	18
chr11	75300550	-	T	chr11:75300550	Rpa1	.	UTR	3_prime_UTR_variant	0	0	75301041	491	upstream	UTR	-0.643752	0.0108	0.0168	0.657	|	0.617541	0.00831	0.00542	0.237	|	0	126	0	1	40	0.025	3	123	0.0243902	0	36	0	5	173	0.0289017	2	36	0.0555556	8	595	0.0134454	0	154	0	21
chr11	75300558	-	T	chr11:75300558	Rpa1	.	UTR	3_prime_UTR_variant	0	0	75301033	475	upstream	UTR	-0.735968	0.0575	0.0958	0.0619	|	0.469994	0.0565	0.0408	0.0584	|	20	134	0.149254	3	40	0.075	11	124	0.0887097	1	35	0.0285714	16	184	0.0869565	4	40	0.1	77	600	0.128333	10	152	0.0657895	51
chr11	75300560	-	T	chr11:75300560	Rpa1	.	UTR	3_prime_UTR_variant	1	1	-	-	-	-	0.0324146	0.186	0.182	0.899	|	0.780102	0.174	0.102	0.0514	|	19	130	0.146154	7	39	0.179487	26	123	0.211382	15	35	0.428571	41	184	0.222826	9	37	0.243243	105	599	0.175292	23	150	0.153333	104
chr11	75300561	-	T	chr11:75300561	Rpa1	.	UTR	3_prime_UTR_variant	0	0	-	-	-	-	0.868946	0.0882	0.0483	0.0644	|	0.628699	0.0407	0.0263	0.179	|	3	130	0.0230769	4	39	0.102564	7	121	0.0578512	5	35	0.142857	14	183	0.0765027	5	37	0.135135	25	597	0.041876	7	152	0.0460526	58
chr11	75300565	-	T	chr11:75300565	Rpa1	.	UTR	3_prime_UTR_variant	0	0	-	-	-	-	-0.290701	0.0604	0.0739	0.387	|	0.772271	0.0583	0.0341	0.0576	|	11	133	0.0827068	1	40	0.025	8	119	0.0672269	3	34	0.0882353	10	184	0.0543478	2	34	0.0588235	38	613	0.0619902	10	153	0.0653595	53
chr11	75300577	-	T	chr11:75300577	Rpa1	.	UTR	3_prime_UTR_variant	0	0	-	-	-	-	0.189267	0.313	0.274	0.407	|	0.264643	0.684	0.569	0.0274	|	29	125	0.232	13	34	0.382353	36	103	0.349515	9	24	0.375	36	152	0.236842	8	28	0.285714	206	606	0.339934	57	163	0.349693	164
chr11	75300578	-	T	chr11:75300578	Rpa1	.	UTR	3_prime_UTR_variant	1	1	-	-	-	-	-0.348069	0.588	0.748	0.0311	|	0.203187	0.792	0.688	0.022	|	95	126	0.753968	26	34	0.764706	73	100	0.73	17	24	0.708333	118	150	0.786667	14	28	0.5	447	599	0.746244	96	159	0.603774	459
chr11	75300580	-	T	chr11:75300580	Rpa1	.	UTR	3_prime_UTR_variant	0	0	-	-	-	-	-1.09542	0.0391	0.0836	0.232	|	-0.0767563	0.0387	0.0408	0.881	|	11	129	0.0852713	1	34	0.0294118	5	107	0.046729	4	25	0.16	17	154	0.11039	2	28	0.0714286	59	626	0.0942492	1	166	0.0060241	46
chr11	75300582	-	T	chr11:75300582	Rpa1	.	UTR	3_prime_UTR_variant	0	0	-	-	-	-	-1.01801	0.00968	0.0196	0.335	|	0.239982	0.019	0.0161	0.665	|	3	126	0.0238095	0	35	0	4	109	0.0366972	1	24	0.0416667	3	164	0.0182927	1	28	0.0357143	19	647	0.0293663	10	159	0.0628931	8
chr11	75300584	-	T	chr11:75300584	Rpa1	.	UTR	3_prime_UTR_variant	1	1	-	-	-	-	-0.0786708	0.533	0.562	0.0555	|	0.200367	0.715	0.622	0.0282	|	67	127	0.527559	18	34	0.529412	61	107	0.570093	12	23	0.521739	103	161	0.639752	17	27	0.62963	347	626	0.554313	78	151	0.516556	330
chr11	75300587	+	A	chr11:75300587	Rpa1	.	UTR	3_prime_UTR_variant	0	0	75301005	418	downstream	UTR	0.419096	0.00134	<0.001	0.363	|	0.914693	0.00189	<0.001	0.374	|	0	130	0	0	37	0	0	111	0	0	22	0	0	163	0	0	30	0	0	665	0	0	158	0	0
chr11	75300589	-	T	chr11:75300589	Rpa1	.	UTR	3_prime_UTR_variant	0	0	-	-	-	-	1.79144	0.0139	0.00403	0.124	|	-0.380392	0.0117	0.0152	0.767	|	0	130	0	0	36	0	2	109	0.0183486	2	22	0.0909091	0	162	0	2	31	0.0645161	6	652	0.00920245	1	158	0.00632911	2
chr11	75300593	-	T	chr11:75300593	Rpa1	.	UTR	3_prime_UTR_variant	1	1	-	-	-	-	-0.434045	0.435	0.588	0.0664	|	0.44076	0.411	0.303	0.00925	|	78	131	0.59542	14	34	0.411765	57	108	0.527778	13	21	0.619048	103	162	0.635802	15	28	0.535714	383	662	0.57855	64	153	0.418301	365
chr11	75300610	-	T	chr11:75300610	Rpa1	.	UTR	3_prime_UTR_variant	1	1	75300982	372	upstream	UTR	-1.75833	0.00886	0.03	0.148	|	0.476631	0.0673	0.0484	0.429	|	3	151	0.0198675	1	43	0.0232558	2	118	0.0169492	0	23	0	8	192	0.0416667	0	33	0	22	641	0.0343214	11	150	0.0733333	44
chr11	75300613	-	T	chr11:75300613	Rpa1	.	UTR	3_prime_UTR_variant	0	0	75300979	366	upstream	UTR	-0.103593	0.00731	0.00785	0.933	|	0.576738	0.00558	0.00374	0.558	|	2	157	0.0127389	4	46	0.0869565	2	119	0.0168067	1	27	0.037037	2	196	0.0102041	0	37	0	5	644	0.00776398	7	148	0.0472973	8
chr11	75300618	-	T	chr11:75300618	Rpa1	.	UTR	3_prime_UTR_variant	1	1	75300974	356	upstream	UTR	0.277941	0.127	0.104	0.433	|	0.62619	0.252	0.163	0.0563	|	14	157	0.089172	9	46	0.195652	12	123	0.097561	4	27	0.148148	16	196	0.0816327	5	37	0.135135	72	624	0.115385	27	152	0.177632	69
chr11	75300622	-	T	chr11:75300622	Rpa1	.	UTR	3_prime_UTR_variant	0	0	-	-	-	-	-0.0730261	0.1	0.105	0.872	|	1.50415	0.0395	0.0139	0.0877	|	12	156	0.0769231	6	49	0.122449	13	118	0.110169	3	25	0.12	22	198	0.111111	1	38	0.0263158	101	620	0.162903	21	156	0.134615	38
chr11	75300623	-	T	chr11:75300623	Rpa1	.	UTR	3_prime_UTR_variant	1	1	-	-	-	-	-1.29046	0.0213	0.052	0.437	|	0.365967	0.119	0.0924	0.267	|	4	162	0.0246914	10	52	0.192308	7	119	0.0588235	4	26	0.153846	12	199	0.0603015	0	38	0	38	624	0.0608974	8	158	0.0506329	36
chr11	75300630	-	T	chr11:75300630	Rpa1	.	UTR	3_prime_UTR_variant	0	0	-	-	-	-	0.482928	0.0523	0.0375	0.476	|	0.861704	0.0711	0.0391	0.187	|	4	166	0.0240964	9	53	0.169811	3	126	0.0238095	1	27	0.037037	14	201	0.0696517	2	41	0.0487805	19	667	0.0284858	7	169	0.0414201	54
chr11	75300631	-	T	chr11:75300631	Rpa1	.	UTR	3_prime_UTR_variant	1	1	-	-	-	-	0.901197	0.148	0.0794	0.0912	|	0.776649	0.131	0.0767	0.191	|	16	166	0.0963855	16	51	0.313725	4	126	0.031746	3	28	0.107143	18	201	0.0895522	7	39	0.179487	42	669	0.0627803	31	169	0.183432	96
chr11	75300638	-	T	chr11:75300638	Rpa1	.	UTR	3_prime_UTR_variant	0	0	-	-	-	-	-1.23928	0.00323	0.00764	0.304	|	0.0516516	0.00817	0.00788	0.949	|	4	189	0.021164	0	55	0	0	143	0	0	32	0	2	221	0.00904977	0	44	0	4	719	0.00556328	5	179	0.027933	15
chr11	75300643	-	T	chr11:75300643	Rpa1	.	UTR	3_prime_UTR_variant	0	0	-	-	-	-	0.442598	0.0142	0.0105	0.52	|	0.621563	0.0379	0.0246	0.476	|	8	203	0.0394089	12	56	0.214286	0	149	0	0	33	0	5	234	0.0213675	1	44	0.0227273	17	730	0.0232877	8	189	0.042328	10
chr11	75300964	+	A	chr11:75300964	Rpa1	.	UTR	3_prime_UTR_variant	0	0	75300631	333	upstream	UTR	-2.40647	<0.001	0.0053	0.00627	|	-0.252563	0.00264	0.00314	0.796	|	2	147	0.0136054	0	29	0	1	163	0.00613497	0	67	0	1	223	0.0044843	0	49	0	0	563	0	0	113	0	2
chr11	75300969	+	A	chr11:75300969	Rpa1	.	UTR	3_prime_UTR_variant	0	0	-	-	-	-	0.717929	0.00164	<0.001	0.363	|	0.629121	0.00155	<0.001	0.374	|	0	145	0	0	31	0	0	149	0	0	63	0	0	216	0	0	50	0	0	528	0	2	101	0.019802	0
chr11	75300972	-	T	chr11:75300972	Rpa1	.	UTR	3_prime_UTR_variant	0	0	-	-	-	-	0.0258395	0.00861	0.00845	0.989	|	-0.660318	0.00354	0.0056	0.692	|	1	145	0.00689655	0	31	0	3	148	0.0202703	6	61	0.0983607	5	219	0.0228311	0	50	0	6	538	0.0111524	0	101	0	0
chr11	75300977	-	T	chr11:75300977	Rpa1	.	UTR	3_prime_UTR_variant	0	0	-	-	-	-	-0.63084	0.0016	0.00248	0.565	|	1.00049	0.0152	0.00758	0.347	|	1	142	0.00704225	0	32	0	0	153	0	1	59	0.0169492	1	221	0.00452489	0	45	0	2	538	0.00371747	0	110	0	0
chr11	75300985	-	T	chr11:75300985	Rpa1	.	UTR	3_prime_UTR_variant	0	0	75300608	377	downstream	UTR	0.266599	0.113	0.0939	0.481	|	-1.46224	0.0109	0.03	0.109	|	14	123	0.113821	3	33	0.0909091	16	136	0.117647	7	55	0.127273	25	208	0.120192	8	45	0.177778	48	514	0.0933852	16	105	0.152381	10
chr11	75300992	+	A	chr11:75300992	Rpa1	.	UTR	3_prime_UTR_variant	0	0	-	-	-	-	0	<0.001	<0.001	---	|	0.655857	0.00158	<0.001	0.374	|	0	120	0	0	33	0	0	134	0	0	49	0	0	195	0	0	42	0	0	477	0	0	98	0	0
chr11	75300999	-	T	chr11:75300999	Rpa1	.	UTR	3_prime_UTR_variant	0	0	-	-	-	-	-1.27237	0.00283	0.00683	0.442	|	0.356752	0.0698	0.0545	0.308	|	0	128	0	2	40	0.05	2	144	0.0138889	0	50	0	2	206	0.00970874	0	44	0	7	505	0.0138614	0	113	0	2
chr11	75301000	-	T	chr11:75301000	Rpa1	.	UTR	3_prime_UTR_variant	1	1	-	-	-	-	-0.420304	0.117	0.156	0.167	|	0.00812399	0.207	0.206	0.894	|	16	133	0.120301	3	40	0.075	27	146	0.184932	10	51	0.196078	42	208	0.201923	4	46	0.0869565	70	508	0.137795	8	113	0.0707965	47
chr11	75301007	-	T	chr11:75301007	Rpa1	.	UTR	3_prime_UTR_variant	0	0	-	-	-	-	-0.153305	0.0971	0.108	0.636	|	-0.336624	0.0759	0.0958	0.34	|	11	127	0.0866142	4	39	0.102564	20	151	0.13245	8	55	0.145455	19	211	0.0900474	5	43	0.116279	72	487	0.147844	6	122	0.0491803	33
chr11	75301008	-	T	chr11:75301008	Rpa1	.	UTR	3_prime_UTR_variant	0	0	-	-	-	-	-0.140158	0.00541	0.00597	0.926	|	1.53103	0.0132	0.00457	0.452	|	3	131	0.0229008	0	40	0	4	154	0.025974	1	56	0.0178571	0	217	0	2	45	0.0444444	1	495	0.0020202	0	122	0	2
chr11	75301010	-	T	chr11:75301010	Rpa1	.	UTR	3_prime_UTR_variant	0	0	-	-	-	-	-2.39657	0.0139	0.0733	0.129	|	0.462633	0.0712	0.0517	0.177	|	10	130	0.0769231	0	40	0	10	154	0.0649351	6	56	0.107143	19	217	0.0875576	2	46	0.0434783	41	507	0.0808679	2	122	0.0163934	16
chr11	75301015	-	T	chr11:75301015	Rpa1	.	UTR	3_prime_UTR_variant	1	1	75300574	441	downstream	UTR	-0.142215	0.747	0.824	0.199	|	0.091486	0.943	0.885	0.0118	|	102	125	0.816	34	42	0.809524	119	156	0.762821	48	58	0.827586	176	217	0.81106	39	46	0.847826	404	497	0.812877	80	117	0.683761	267
chr11	75301019	-	T	chr11:75301019	Rpa1	.	UTR	3_prime_UTR_variant	1	1	75300572	447	downstream	UTR	2.58127	0.0129	0.00215	0.152	|	-0.60194	0.045	0.0684	0.0734	|	0	131	0	1	43	0.0232558	1	165	0.00606061	5	60	0.0833333	2	226	0.00884956	0	48	0	0	507	0	3	119	0.0252101	0
chr11	75301022	-	T	chr11:75301022	Rpa1	.	UTR	3_prime_UTR_variant	0	0	75300568	454	downstream	UTR	-0.926855	0.00417	0.00793	0.581	|	1.6241	0.00938	0.00304	0.372	|	1	134	0.00746269	0	42	0	0	168	0	1	61	0.0163934	4	225	0.0177778	0	49	0	4	512	0.0078125	1	119	0.00840336	13
chr11	75301024	-	T	chr11:75301024	Rpa1	.	UTR	3_prime_UTR_variant	0	0	75300567	457	downstream	UTR	0.14105	0.0229	0.0208	0.766	|	-0.338328	0.0216	0.0273	0.626	|	6	130	0.0461538	3	41	0.0731707	3	169	0.0177515	3	60	0.05	6	225	0.0266667	1	46	0.0217391	17	512	0.0332031	6	123	0.0487805	1
chr11	75301025	-	T	chr11:75301025	Rpa1	.	UTR	3_prime_UTR_variant	0	0	75300566	459	downstream	UTR	0.800518	0.022	0.0126	0.512	|	-1.11062	<0.001	0.00216	0.184	|	5	128	0.0390625	2	42	0.047619	1	170	0.00588235	4	61	0.0655738	3	224	0.0133929	1	47	0.0212766	9	508	0.0177165	0	125	0	4
chr11	75301026	-	T	chr11:75301026	Rpa1	.	UTR	3_prime_UTR_variant	0	0	75300566	460	downstream	UTR	-0.282302	0.0149	0.0181	0.873	|	0.615884	0.00616	0.00402	0.739	|	4	129	0.0310078	0	41	0	2	168	0.0119048	9	60	0.15	2	225	0.00888889	4	47	0.0851064	22	513	0.042885	0	123	0	8
chr11	75301032	-	T	chr11:75301032	Rpa1	.	UTR	3_prime_UTR_variant	1	1	75300559	473	downstream	UTR	-0.0622383	0.147	0.154	0.903	|	0.128856	0.075	0.0686	0.597	|	20	133	0.150376	6	44	0.136364	34	170	0.2	15	59	0.254237	44	229	0.19214	14	49	0.285714	85	507	0.167653	4	126	0.031746	37
chr11	75301040	-	T	chr11:75301040	Rpa1	.	UTR	3_prime_UTR_variant	1	1	75300551	489	downstream	UTR	-1.22233	0.0771	0.18	0.00214	|	0.894034	0.0547	0.0294	0.0483	|	21	132	0.159091	4	45	0.0888889	27	168	0.160714	4	55	0.0727273	38	222	0.171171	4	51	0.0784314	97	532	0.182331	15	136	0.110294	61
chr11	75301041	-	T	chr11:75301041	Rpa1	.	UTR	3_prime_UTR_variant	0	0	75300550	491	downstream	UTR	-1.26571	0.00235	0.00565	0.194	|	1.79252	0.0259	0.00749	0.026	|	0	132	0	0	46	0	0	167	0	0	55	0	5	222	0.0225225	1	50	0.02	16	533	0.0300188	0	138	0	2
chr11	75576826	+	A	chr11:75576826	Slc43a2	.	UTR	3_prime_UTR_variant	0	0	-	-	-	-	-0.663183	<0.001	0.00158	0.185	|	1.01958	0.0181	0.00894	0.619	|	1	191	0.0052356	0	4	0	0	213	0	0	4	0	1	332	0.00301205	0	6	0	0	316	0	0	16	0	0
chr11	75596758	+	A	chr11:75596758	4931413K12Rik,Gm12338,Pitpna	SINE	Intron	non_coding_transcript_variant	0	0	-	-	-	-	-1.34855	<0.001	0.00255	0.363	|	-0.716739	0.098	0.161	0.674	|	0	9	0	0	17	0	0	5	0	0	20	0	0	13	0	0	20	0	0	1	0	0	6	0	0
chr11	75599560	+	A	chr11:75599560	4931413K12Rik,Gm12338,Pitpna	SINE	Intron	NMD_transcript_variant	1	1	-	-	-	-	-0.386988	0.00201	0.00263	0.845	|	6.05868	0.0667	<0.001	0.0163	|	0	74	0	0	34	0	0	40	0	1	15	0.0666667	0	67	0	0	15	0	3	9	0.333333	0	7	0	0
chr11	75604302	+	A	chr11:75604302	Gm12338,Pitpna	SINE	Intron	NMD_transcript_variant	0	0	-	-	-	-	1.3968	0.00263	<0.001	0.363	|	3.7707	0.341	0.025	0.104	|	0	18	0	0	16	0	0	7	0	1	3	0.333333	0	9	0	0	5	0	0	3	0	0	0	---	0
chr11	75604306	+	A	chr11:75604306	Gm12338,Pitpna	SINE	Intron	NMD_transcript_variant	0	0	-	-	-	-	0	<0.001	<0.001	---	|	3.26403	0.23	0.024	0.0958	|	0	17	0	0	15	0	0	7	0	0	3	0	0	8	0	0	5	0	0	3	0	0	0	---	0
chr11	75699325	+	A	chr11:75699325	Crk	SINE	Intron	intron_variant	1	1	-	-	-	-	1.6092	0.0114	0.00375	0.494	|	0.844644	0.572	0.318	0.0267	|	0	47	0	17	92	0.184783	0	30	0	7	55	0.127273	1	45	0.0222222	6	63	0.0952381	1	8	0.125	0	0	---	0
chr11	75699407	+	A	chr11:75699407	Crk	SINE	Intron	intron_variant	1	1	-	-	-	-	0	<0.001	<0.001	---	|	1.52877	0.00289	<0.001	0.374	|	0	46	0	0	94	0	0	27	0	0	46	0	0	37	0	0	63	0	0	3	0	0	0	---	0
chr11	75699613	+	A	chr11:75699613	Crk	SINE	Intron	intron_variant	0	0	-	-	-	-	1.07823	0.00211	<0.001	0.363	|	3.96589	0.0393	0.00251	0.0486	|	0	55	0	7	79	0.0886076	0	38	0	0	31	0	0	43	0	0	64	0	0	4	0	0	6	0	0
chr11	75705297	+	A	chr11:75705297	Crk	SINE	UTR	3_prime_UTR_variant	0	0	-	-	-	-	0.660836	0.00158	<0.001	0.182	|	1.9016	0.0338	0.00906	0.00377	|	0	349	0	0	269	0	0	276	0	0	214	0	0	377	0	1	317	0.00315457	0	271	0	1	202	0.0049505	0
chr11	76414789	+	A	chr11:76414789	Abr,Timm22	SINE	UTR	3_prime_UTR_variant	0	0	-	-	-	-	0	<0.001	<0.001	---	|	3.48452	0.0678	0.00606	0.0163	|	0	39	0	0	2	0	0	34	0	0	2	0	0	50	0	0	1	0	0	38	0	0	28	0	0
chr11	76780551	-	T	chr11:76780551	Cpd	.	UTR	3_prime_UTR_variant	0	0	-	-	-	-	-2.10409	0.00248	0.0106	0.0956	|	-1.61639	0.00613	0.0188	0.113	|	10	1150	0.00869565	4	858	0.004662	5	781	0.00640205	2	479	0.00417537	17	1050	0.0161905	8	677	0.0118168	0	269	0	0	138	0	6
chr11	76781837	-	T	chr11:76781837	Cpd	.	UTR	3_prime_UTR_variant	0	0	-	-	-	-	0.207225	0.0814	0.0705	0.785	|	0.648812	0.0797	0.0508	0.36	|	100	792	0.126263	24	513	0.0467836	51	490	0.104082	19	362	0.0524862	72	750	0.096	25	506	0.0494071	6	142	0.0422535	10	30	0.333333	5
chr11	77521505	+	A	chr11:77521505	Abhd15,Gm10392	SINE	intergenic	intron_variant	0	0	77520574	931	upstream	undefined	0.57037	0.0182	0.0123	0.716	|	0	<0.001	<0.001	---	|	5	193	0.0259067	12	83	0.144578	5	172	0.0290698	0	37	0	10	177	0.0564972	3	63	0.047619	0	122	0	2	28	0.0714286	0
chr11	77521512	+	A	chr11:77521512	Abhd15,Gm10392	SINE	intergenic	intron_variant	0	0	-	-	-	-	-3.09021	0.00761	0.0648	0.0786	|	0	<0.001	<0.001	---	|	11	177	0.0621469	3	70	0.0428571	9	159	0.0566038	0	33	0	14	166	0.0843373	4	52	0.0769231	3	121	0.0247934	0	22	0	7
chr11	77521516	+	A	chr11:77521516	Abhd15,Gm10392	SINE	intergenic	intron_variant	0	0	-	-	-	-	0.353609	0.342	0.268	0.2	|	0	<0.001	<0.001	---	|	38	180	0.211111	15	73	0.205479	44	159	0.27673	9	31	0.290323	40	166	0.240964	16	52	0.307692	23	121	0.190083	12	22	0.545455	12
chr11	77521532	+	A	chr11:77521532	Abhd15,Gm10392	SINE	intergenic	intron_variant	0	0	-	-	-	-	-0.781797	0.0841	0.145	0.598	|	0	<0.001	<0.001	---	|	26	169	0.153846	19	78	0.24359	23	147	0.156463	3	28	0.107143	26	178	0.146067	13	51	0.254902	16	139	0.115108	4	15	0.266667	4
chr11	77521540	+	A	chr11:77521540	Abhd15,Gm10392	SINE	intergenic	intron_variant	0	0	-	-	-	-	-1.35377	0.033	0.0842	0.41	|	0	<0.001	<0.001	---	|	8	179	0.0446927	9	80	0.1125	14	142	0.0985915	2	29	0.0689655	16	183	0.0874317	1	55	0.0181818	5	132	0.0378788	1	23	0.0434783	12
chr11	77521543	+	A	chr11:77521543	Abhd15,Gm10392	SINE	intergenic	intron_variant	0	0	-	-	-	-	-1.46853	0.0199	0.055	0.378	|	0	<0.001	<0.001	---	|	12	177	0.0677966	4	87	0.045977	4	143	0.027972	2	35	0.0571429	15	179	0.0837989	8	57	0.140351	5	133	0.037594	0	23	0	6
chr11	77521544	+	A	chr11:77521544	Abhd15,Gm10392	SINE	intergenic	intron_variant	0	0	-	-	-	-	-2.41752	0.0108	0.0577	0.0775	|	0	<0.001	<0.001	---	|	7	177	0.039548	6	85	0.0705882	15	143	0.104895	1	36	0.0277778	10	179	0.0558659	3	58	0.0517241	11	131	0.0839695	0	23	0	1
chr11	77521571	+	A	chr11:77521571	Abhd15,Gm10392	SINE	intergenic	intron_variant	0	0	-	-	-	-	-0.971656	0.0527	0.103	0.442	|	0	<0.001	<0.001	---	|	21	161	0.130435	15	92	0.163043	21	123	0.170732	9	36	0.25	22	164	0.134146	8	51	0.156863	8	102	0.0784314	1	19	0.0526316	5
chr11	77530014	-	T	chr11:77530014	Abhd15,Taok1	.	UTR	3_prime_UTR_variant	0	0	-	-	-	-	-2.30469	0.00149	0.00735	0.0398	|	0.996549	0.002	<0.001	0.189	|	3	170	0.0176471	0	153	0	1	95	0.0105263	0	112	0	5	204	0.0245098	0	130	0	5	144	0.0347222	1	92	0.0108696	0
chr11	77534417	-	T	chr11:77534417	Abhd15,Taok1	.	UTR	3_prime_UTR_variant	0	0	-	-	-	-	-1.3867	0.0129	0.0337	0.074	|	-1.72915	0.00555	0.0184	0.132	|	20	107	0.186916	8	275	0.0290909	4	27	0.148148	2	165	0.0121212	20	125	0.16	10	185	0.0540541	6	18	0.333333	8	33	0.242424	0
chr11	77534420	-	T	chr11:77534420	Abhd15,Taok1	.	UTR	3_prime_UTR_variant	0	0	-	-	-	-	-2.87112	0.00327	0.0239	0.0854	|	0.487657	0.00554	0.00395	0.606	|	10	105	0.0952381	8	280	0.0285714	4	30	0.133333	0	166	0	15	127	0.11811	8	187	0.0427807	2	16	0.125	0	33	0	0
chr11	77534493	-	T	chr11:77534493	Abhd15,Taok1	.	UTR	3_prime_UTR_variant	0	0	-	-	-	-	-3.36204	0.00313	0.0322	0.0412	|	-0.880521	0.00718	0.0132	0.671	|	11	164	0.0670732	1	402	0.00248756	6	80	0.075	6	307	0.019544	4	164	0.0243902	6	309	0.0194175	3	24	0.125	0	74	0	0
chr11	77534495	-	T	chr11:77534495	Abhd15,Taok1	.	UTR	3_prime_UTR_variant	0	0	-	-	-	-	-3.32063	0.00517	0.0516	0.184	|	-1.2503	0.0109	0.026	0.283	|	24	166	0.144578	3	408	0.00735294	10	82	0.121951	0	312	0	24	169	0.142012	7	312	0.0224359	1	24	0.0416667	0	77	0	6
chr11	77534496	-	T	chr11:77534496	Abhd15,Taok1	.	UTR	3_prime_UTR_variant	0	0	-	-	-	-	-3.36571	0.00856	0.0883	0.0591	|	-1.47251	0.0128	0.0355	0.187	|	24	165	0.145455	4	406	0.00985222	12	82	0.146341	4	310	0.0129032	26	168	0.154762	8	311	0.0257235	2	23	0.0869565	0	77	0	3
chr11	77536043	-	T	chr11:77536043	Abhd15,Taok1	SINE	UTR	3_prime_UTR_variant	0	0	-	-	-	-	-1.99916	0.00129	0.00516	0.0934	|	0.711631	0.0284	0.0174	0.364	|	2	121	0.0165289	0	322	0	4	95	0.0421053	0	224	0	4	148	0.027027	1	217	0.00460829	0	21	0	0	15	0	0
chr11	77536054	-	T	chr11:77536054	Abhd15,Taok1	SINE	UTR	3_prime_UTR_variant	1	1	-	-	-	-	-1.75836	0.00519	0.0176	0.409	|	1.17817	0.401	0.177	0.000806	|	6	113	0.0530973	0	302	0	6	83	0.0722892	2	209	0.00956938	8	136	0.0588235	5	203	0.0246305	3	23	0.130435	0	19	0	0
chr11	78073177	+	A	chr11:78073177	Eral1,Mir144,Mir451a,Mir451b	.	Exon	regulatory_region_variant	0	0	-	-	-	-	-0.362848	0.0228	0.0293	0.798	|	0	<0.001	<0.001	---	|	1	26	0.0384615	0	23	0	0	71	0	1	52	0.0192308	1	36	0.0277778	2	38	0.0526316	9	53	0.169811	3	87	0.0344828	3
chr11	78073212	+	A	chr11:78073212	Eral1,Mir144,Mir451a,Mir451b	.	Exon	regulatory_region_variant	0	0	78073196	16	upstream	exonic	-2.1084	0.02	0.0864	0.193	|	0	<0.001	<0.001	---	|	1	24	0.0416667	0	25	0	4	60	0.0666667	3	52	0.0576923	4	33	0.121212	0	30	0	6	37	0.162162	6	58	0.103448	5
chr11	78187357	-	T	chr11:78187357	Rab34,Rpl23a,Snord42b	SINE	intergenic	upstream_gene_variant	0	0	78186438	919	downstream	undefined	0	<0.001	<0.001	---	|	-1.26726	0.0209	0.0503	0.673	|	0	0	---	0	0	---	---	---	---	---	---	---	0	0	---	---	---	---	0	0	---	---	---	---	---
chr11	78247730	+	A	chr11:78247730	Sdf2,Supt6	SINE	Intron	regulatory_region_variant	0	0	78247301	429	upstream	intronic	3.04098	0.00823	<0.001	0.0773	|	4.17192	0.391	0.0217	0.065	|	0	49	0	9	84	0.107143	0	18	0	2	47	0.0425532	0	37	0	3	44	0.0681818	0	26	0	0	11	0	0
chr11	78254276	+	A	chr11:78254276	Sdf2	SINE	Intron	non_coding_transcript_variant	0	0	-	-	-	-	0	<0.001	<0.001	---	|	0.995456	0.116	0.0581	0.734	|	0	30	0	0	14	0	0	42	0	0	11	0	0	24	0	0	19	0	0	44	0	0	10	0	0
chr11	79577481	+	A	chr11:79577481	Nf1	SINE	Intron	regulatory_region_variant	0	0	-	-	-	-	0	<0.001	<0.001	---	|	4.13877	0.144	0.00817	0.136	|	0	15	0	0	1	0	0	9	0	---	---	---	0	6	0	0	0	---	0	0	---	0	0	---	0
chr11	79934083	-	T	chr11:79934083	Utp6	SINE	UTR	3_prime_UTR_variant	0	0	79933464	619	downstream	intronic	0	<0.001	<0.001	---	|	3.05599	0.0344	0.00414	0.25	|	0	20	0	0	13	0	0	24	0	---	---	---	0	26	0	0	12	0	0	52	0	0	14	0	0
chr11	80140505	-	T	chr11:80140505	Atad5,Tefm	SINE	Intron	5_prime_UTR_variant	0	0	-	-	-	-	0	<0.001	<0.001	---	|	1.18941	0.00924	0.00405	0.547	|	0	6	0	0	5	0	0	11	0	0	3	0	0	15	0	0	0	---	0	15	0	0	1	0	0
chr11	80362941	-	T	chr11:80362941	5730455P16Rik	SINE	UTR	3_prime_UTR_variant	0	0	80364360	1419	upstream	intronic	0	<0.001	<0.001	---	|	0.610609	0.0138	0.00903	0.763	|	0	20	0	0	0	---	0	28	0	0	0	---	0	42	0	0	2	0	0	10	0	0	3	0	0
chr11	82962588	+	A	chr11:82962588	Slfn5,Slfn5os	SINE	UTR	3_prime_UTR_variant	0	0	82963279	691	downstream	UTR	-3.59936	0.00553	0.067	0.219	|	-2.67872	0.00494	0.0316	0.639	|	1	12	0.0833333	0	5	0	1	12	0.0833333	0	5	0	3	23	0.130435	1	6	0.166667	0	67	0	6	35	0.171429	2
chr11	82963462	+	A	chr11:82963462	Slfn5,Slfn5os	SINE	UTR	3_prime_UTR_variant	0	0	82962653	809	upstream	UTR	-2.64328	0.0051	0.0319	0.164	|	-1.69096	0.00431	0.0139	0.587	|	3	43	0.0697674	0	5	0	1	46	0.0217391	0	5	0	9	69	0.130435	3	18	0.166667	4	155	0.0258065	7	66	0.106061	7
chr11	82963463	+	A	chr11:82963463	Slfn5,Slfn5os	SINE	UTR	3_prime_UTR_variant	0	0	82962652	811	upstream	UTR	-4.03749	0.00558	0.0917	0.0559	|	-4.92271	0.00208	0.0632	0.00398	|	3	43	0.0697674	0	5	0	2	46	0.0434783	0	5	0	8	70	0.114286	4	18	0.222222	10	156	0.0641026	9	66	0.136364	5
chr11	82963522	+	A	chr11:82963522	Slfn5,Slfn5os	SINE	UTR	3_prime_UTR_variant	1	1	82962592	930	upstream	UTR	-3.23066	0.0126	0.118	0.136	|	-5.3529	0.00288	0.118	0.0361	|	2	36	0.0555556	0	1	0	3	35	0.0857143	2	4	0.5	9	63	0.142857	1	14	0.0714286	13	136	0.0955882	7	62	0.112903	14
chr11	83420645	-	T	chr11:83420645	Gas2l2,Rasl10b	.	UTR	3_prime_UTR_variant	1	1	-	-	-	-	0	<0.001	<0.001	---	|	-0.392032	<0.001	0.00131	0.374	|	0	0	---	0	0	---	0	2	0	0	0	---	0	0	---	0	0	---	0	11	0	0	27	0	0
chr11	83491687	+	A	chr11:83491687	Taf15	SINE	Intron	TF_binding_site_variant	0	0	-	-	-	-	2.57436	0.00596	<0.001	0.175	|	4.7137	0.141	0.00537	0.0543	|	0	83	0	5	28	0.178571	0	32	0	3	12	0.25	0	43	0	0	12	0	0	8	0	0	0	---	0
chr11	83491697	+	A	chr11:83491697	Taf15	SINE	Intron	regulatory_region_variant	0	0	-	-	-	-	3.42699	0.0108	<0.001	0.0779	|	5.638	0.223	0.00448	0.0156	|	0	82	0	4	19	0.210526	0	30	0	2	17	0.117647	0	52	0	1	16	0.0625	0	7	0	0	0	---	0
chr11	83491721	+	A	chr11:83491721	Taf15	SINE	Intron	regulatory_region_variant	0	0	-	-	-	-	0	<0.001	<0.001	---	|	6.75934	0.297	0.00274	0.0137	|	0	68	0	0	12	0	0	29	0	0	16	0	0	53	0	0	17	0	0	10	0	0	0	---	0
chr11	83588576	-	T	chr11:83588576	Ccl6,E230016K23Rik	.	UTR	3_prime_UTR_variant	0	0	-	-	-	-	-0.229834	0.00141	0.00165	0.722	|	0.531163	0.0225	0.0156	0.81	|	6	3153	0.00190295	0	604	0	9	2237	0.00402325	0	432	0	14	3156	0.00443599	6	772	0.00777202	9	5546	0.00162279	0	1318	0	1
chr11	84535174	+	A	chr11:84535174	Lhx1os	SINE	Exon	non_coding_transcript_exon_variant	0	0	-	-	-	-	-2.80873	0.0306	0.214	0.432	|	0.317322	0.184	0.147	0.0163	|	---	---	---	---	---	---	0	2	0	---	---	---	0	4	0	---	---	---	4	33	0.121212	5	35	0.142857	6
chr11	84535175	+	A	chr11:84535175	Lhx1os	SINE	Exon	non_coding_transcript_exon_variant	0	0	-	-	-	-	0	<0.001	<0.001	---	|	0.739109	0.0195	0.0117	0.431	|	---	---	---	---	---	---	0	2	0	---	---	---	0	4	0	---	---	---	0	33	0	0	35	0	0
chr11	84852310	-	T	chr11:84852310	Ggnbp2	SINE	Intron	intron_variant	0	0	84851332	978	downstream	intronic	0.882817	0.00463	0.00251	0.408	|	4.90238	0.0299	<0.001	0.0756	|	0	35	0	0	54	0	0	21	0	2	37	0.0540541	0	38	0	0	44	0	0	19	0	0	9	0	2
chr11	84876765	-	T	chr11:84876765	Myo19,Pigw	SINE	UTR	3_prime_UTR_variant	0	0	84875637	1128	downstream	undefined	2.42036	0.00535	<0.001	0.177	|	-2.52808	0.00454	0.0262	0.378	|	0	16	0	0	8	0	0	17	0	1	10	0.1	0	24	0	0	22	0	0	47	0	0	15	0	0
chr11	85190005	-	T	chr11:85190005	Appbp2	SINE	UTR	3_prime_UTR_variant	0	0	85192029	2024	upstream	intronic	-1.46742	<0.001	0.00277	0.179	|	0.533177	0.055	0.038	0.505	|	1	71	0.0140845	0	51	0	2	63	0.031746	0	48	0	0	76	0	0	48	0	0	41	0	0	104	0	0
chr11	86509915	-	T	chr11:86509915	Rps6kb1	SINE	Intron	non_coding_transcript_variant	0	0	-	-	-	-	0	<0.001	<0.001	---	|	2.6454	0.0207	0.00331	0.176	|	0	21	0	0	19	0	0	8	0	0	12	0	0	14	0	0	7	0	0	0	---	0	0	---	0
chr11	87115184	+	A	chr11:87115184	Mir301,Ska2	SINE	Intron	non_coding_transcript_variant	1	1	-	-	-	-	-1.03515	<0.001	0.00205	0.363	|	2.40951	0.397	0.0748	0.197	|	0	9	0	0	5	0	0	10	0	0	0	---	2	27	0.0740741	0	1	0	0	0	---	0	0	---	0
chr11	87122409	+	A	chr11:87122409	Gm11491,Ska2,Trim37	SINE	UTR	3_prime_UTR_variant	0	0	-	-	-	-	-0.411945	0.00206	0.00274	0.808	|	-0.583361	0.0261	0.0391	0.381	|	0	58	0	0	21	0	0	56	0	0	40	0	1	89	0.011236	0	24	0	3	79	0.0379747	0	36	0	0
chr11	87123277	+	A	chr11:87123277	Gm11491,Ska2,Trim37	SINE	UTR	3_prime_UTR_variant	0	0	-	-	-	-	0.829001	0.00701	0.00395	0.767	|	2.14822	0.0629	0.0142	0.043	|	1	32	0.03125	0	3	0	0	31	0	0	9	0	4	33	0.121212	0	5	0	0	23	0	0	4	0	0
chr11	87123288	+	A	chr11:87123288	Gm11491,Ska2,Trim37	SINE	UTR	3_prime_UTR_variant	0	0	-	-	-	-	-3.23196	0.00316	0.0297	0.317	|	-0.214154	0.0794	0.0921	0.737	|	3	33	0.0909091	0	3	0	4	29	0.137931	0	7	0	8	35	0.228571	0	2	0	6	25	0.24	0	4	0	0
chr11	87123463	+	A	chr11:87123463	Gm11491,Ska2,Trim37	SINE	UTR	3_prime_UTR_variant	0	0	87121496	1967	upstream	intronic	-1.56634	<0.001	0.00296	0.391	|	0.193516	0.00946	0.00827	0.903	|	1	13	0.0769231	0	0	---	0	19	0	0	2	0	0	34	0	0	9	0	0	10	0	---	---	---	0
chr11	87980593	-	T	chr11:87980593	Dynll2	.	UTR	3_prime_UTR_variant	0	0	-	-	-	-	-3.48123	0.00148	0.0165	0.000863	|	-0.690733	0.00102	0.00165	0.0396	|	8	169	0.0473373	0	81	0	1	157	0.00636943	0	99	0	10	234	0.042735	1	96	0.0104167	2	208	0.00961538	0	131	0	2
chr11	88079786	+	A	chr11:88079786	Vezf1	SINE	Intron	intron_variant	0	0	-	-	-	-	0.540259	0.00504	0.00347	0.607	|	-0.51596	0.0108	0.0155	0.874	|	1	48	0.0208333	2	87	0.0229885	1	12	0.0833333	1	50	0.02	0	36	0	3	84	0.0357143	0	7	0	0	13	0	0
chr11	88080748	+	A	chr11:88080748	Vezf1	SINE	Intron	intron_variant	0	0	-	-	-	-	-1.6147	0.00198	0.00605	0.264	|	-0.943175	0.0482	0.0927	0.639	|	2	47	0.0425532	0	101	0	0	34	0	0	54	0	1	48	0.0208333	4	67	0.0597015	1	18	0.0555556	0	17	0	0
chr11	88080749	+	A	chr11:88080749	Vezf1	SINE	Intron	intron_variant	0	0	-	-	-	-	2.43884	0.00906	0.00167	0.132	|	1.24326	0.141	0.0595	0.533	|	1	46	0.0217391	1	96	0.0104167	0	34	0	1	52	0.0192308	0	47	0	1	64	0.015625	0	18	0	3	17	0.176471	0
chr11	88080786	+	A	chr11:88080786	Vezf1	SINE	Intron	intron_variant	0	0	-	-	-	-	2.16896	0.0157	0.00349	0.0942	|	1.7973	0.148	0.0425	0.346	|	0	42	0	6	120	0.05	0	42	0	2	66	0.030303	2	58	0.0344828	3	79	0.0379747	1	19	0.0526316	6	23	0.26087	0
chr11	88831779	-	T	chr11:88831779	Akap1	.	Exon	synonymous_variant	0	0	88833612	1833	upstream	intronic	0	<0.001	<0.001	---	|	4.67782	0.0534	0.00209	0.00203	|	0	23	0	0	0	---	0	13	0	0	6	0	0	37	0	0	4	0	0	37	0	0	11	0	0
chr11	89036382	-	T	chr11:89036382	Dgke	SINE	UTR	3_prime_UTR_variant	0	0	89037765	1383	upstream	UTR	0	<0.001	<0.001	---	|	0.805541	0.25	0.143	0.298	|	0	5	0	0	19	0	0	7	0	0	10	0	0	12	0	0	8	0	0	18	0	0	20	0	0
chr11	89036756	-	T	chr11:89036756	Dgke	SINE	UTR	3_prime_UTR_variant	0	0	-	-	-	-	-1.13264	<0.001	0.00219	0.363	|	1.06375	0.138	0.066	0.0909	|	0	16	0	0	28	0	1	9	0.111111	0	29	0	0	18	0	0	29	0	0	20	0	0	27	0	0
chr11	94123712	+	A	chr11:94123712	Spag9	.	UTR	3_prime_UTR_variant	0	0	-	-	-	-	-3.0934	<0.001	0.00854	0.0336	|	0.631882	0.00489	0.00315	0.413	|	2	205	0.0097561	0	20	0	4	145	0.0275862	0	21	0	4	237	0.0168776	0	45	0	8	94	0.0851064	0	40	0	0
chr11	94540474	-	T	chr11:94540474	Rsad1	SINE	UTR	3_prime_UTR_variant	1	1	94542028	1554	upstream	UTR	0	<0.001	<0.001	---	|	0.897449	0.0466	0.025	0.718	|	0	12	0	0	5	0	0	2	0	0	4	0	0	10	0	0	0	---	1	3	0.333333	---	---	---	0
chr11	94540492	-	T	chr11:94540492	Rsad1	SINE	UTR	3_prime_UTR_variant	1	1	94542012	1520	upstream	UTR	0	<0.001	<0.001	---	|	0.0836879	0.0341	0.0322	0.92	|	0	12	0	0	3	0	0	1	0	0	4	0	0	12	0	0	0	---	0	3	0	---	---	---	0
chr11	94540676	-	T	chr11:94540676	Rsad1	SINE	UTR	3_prime_UTR_variant	1	1	-	-	-	-	0	<0.001	<0.001	---	|	-0.710275	0.00295	0.00482	0.789	|	0	9	0	0	1	0	0	7	0	---	---	---	0	11	0	0	0	---	0	5	0	---	---	---	0
chr11	94542013	-	T	chr11:94542013	Rsad1	SINE	UTR	3_prime_UTR_variant	1	1	94540489	1524	downstream	UTR	0	<0.001	<0.001	---	|	0.61829	0.00523	0.00341	0.742	|	0	14	0	---	---	---	0	23	0	---	---	---	0	14	0	0	0	---	0	20	0	0	8	0	0
chr11	94542024	-	T	chr11:94542024	Rsad1	SINE	UTR	3_prime_UTR_variant	1	1	94540479	1545	downstream	UTR	1.99316	0.00398	<0.001	0.374	|	0.725182	0.0249	0.015	0.609	|	0	12	0	1	1	1	1	23	0.0434783	---	---	---	0	15	0	0	0	---	0	22	0	0	14	0	0
chr11	94542033	-	T	chr11:94542033	Rsad1	SINE	UTR	3_prime_UTR_variant	1	1	-	-	-	-	1.99316	0.00398	<0.001	0.374	|	-0.621561	0.00226	0.00348	0.762	|	0	12	0	1	1	1	0	23	0	---	---	---	0	14	0	0	0	---	0	24	0	0	14	0	0
chr11	95765526	+	A	chr11:95765526	Polr2k-ps,Zfp652	.	UTR	regulatory_region_variant	0	0	95765101	425	upstream	UTR	-2.96149	0.00513	0.0399	0.127	|	0	<0.001	<0.001	---	|	3	174	0.0172414	0	42	0	8	111	0.0720721	2	22	0.0909091	2	136	0.0147059	0	33	0	4	18	0.222222	1	5	0.2	3
chr11	95770496	+	A	chr11:95770496	Zfp652	.	UTR	3_prime_UTR_variant	0	0	-	-	-	-	-1.26469	0.0166	0.0399	0.153	|	1.7311	0.0191	0.00576	0.395	|	29	272	0.106618	2	25	0.08	15	209	0.0717703	1	19	0.0526316	31	285	0.108772	1	31	0.0322581	2	72	0.0277778	0	37	0	0
chr11	96043629	+	A	chr11:96043629	Snf8,Ube2z	SINE	Intron	non_coding_transcript_exon_variant	0	0	96042299	1330	upstream	intronic	1.19307	0.00229	<0.001	0.363	|	-0.236114	0.00226	0.00266	0.914	|	0	24	0	0	13	0	0	17	0	1	7	0.142857	0	38	0	0	3	0	0	18	0	0	3	0	0
chr11	96071642	-	T	chr11:96071642	Atp5g1	SINE	UTR	3_prime_UTR_variant	1	1	96069341	2301	downstream	UTR	0	<0.001	<0.001	---	|	3.08923	0.00851	<0.001	0.181	|	0	3	0	0	0	---	---	---	---	0	0	---	0	2	0	0	1	0	0	1	0	---	---	---	0
chr11	96071662	-	T	chr11:96071662	Atp5g1	SINE	UTR	3_prime_UTR_variant	1	1	-	-	-	-	-1	0.0158	0.0316	0.5	|	-0.133078	0.297	0.326	0.792	|	0	2	0	0	0	---	---	---	---	0	0	---	1	1	1	1	4	0.25	0	1	0	---	---	---	0
chr11	96807062	+	A	chr11:96807062	Cbx1	.	Intron	3_prime_UTR_variant	0	0	-	-	-	-	-0.958492	0.0102	0.0198	0.614	|	-0.560669	0.00706	0.0104	0.628	|	5	243	0.0205761	0	31	0	7	244	0.0286885	2	29	0.0689655	10	363	0.0275482	4	55	0.0727273	1	212	0.00471698	18	80	0.225	7
chr11	96938329	-	T	chr11:96938329	D030028A08Rik,Pnpo,Prr15l	.	UTR	regulatory_region_variant	0	0	-	-	-	-	0.875341	0.0143	0.00779	0.0932	|	0.788274	0.00224	0.0013	0.292	|	1	404	0.00247525	6	474	0.0126582	2	735	0.00272109	4	702	0.00569801	5	628	0.00796178	10	433	0.0230947	6	675	0.00888889	10	627	0.015949	8
chr11	96964962	+	A	chr11:96964962	D030028A08Rik,Sp2	SINE	Intron	non_coding_transcript_exon_variant	1	1	96964700	262	upstream	intronic	0.467892	0.00316	0.00229	0.842	|	0.129902	0.389	0.355	0.358	|	0	5	0	0	7	0	0	1	0	0	7	0	1	7	0.142857	0	12	0	0	1	0	2	2	1	0
chr11	96964964	+	A	chr11:96964964	D030028A08Rik,Sp2	SINE	Intron	non_coding_transcript_exon_variant	1	1	96964698	266	upstream	intronic	1.66096	0.00316	<0.001	0.363	|	0.0143043	0.24	0.238	0.98	|	0	5	0	0	7	0	0	1	0	0	7	0	0	7	0	0	12	0	0	1	0	2	2	1	0
chr11	96964972	+	A	chr11:96964972	D030028A08Rik,Sp2	SINE	Intron	non_coding_transcript_exon_variant	0	0	96966009	1037	downstream	intronic	-3.32193	0.00246	0.0246	0.304	|	0.242423	0.682	0.577	0.44	|	0	3	0	0	6	0	1	1	1	0	6	0	2	6	0.333333	0	12	0	0	1	0	2	9	0.222222	0
chr11	96964973	+	A	chr11:96964973	D030028A08Rik,Sp2	SINE	Intron	non_coding_transcript_exon_variant	0	0	96966008	1035	downstream	intronic	-4.62124	<0.001	0.0246	0.0767	|	-0.26075	0.247	0.296	0.358	|	0	3	0	0	6	0	1	1	1	0	6	0	2	6	0.333333	0	12	0	0	1	0	0	9	0	0
chr11	96965013	+	A	chr11:96965013	D030028A08Rik,Sp2	SINE	Intron	non_coding_transcript_exon_variant	0	0	-	-	-	-	0	<0.001	<0.001	---	|	-2.08711	0.0118	0.0503	0.268	|	0	3	0	0	8	0	0	2	0	0	0	---	0	16	0	0	8	0	0	3	0	0	9	0	0
chr11	96965020	+	A	chr11:96965020	D030028A08Rik,Sp2	SINE	Intron	non_coding_transcript_exon_variant	1	1	96965962	942	downstream	intronic	0	<0.001	<0.001	---	|	-0.115253	0.0292	0.0316	0.953	|	0	4	0	0	9	0	0	2	0	0	0	---	0	15	0	0	6	0	0	5	0	0	7	0	0
chr11	96965024	+	A	chr11:96965024	D030028A08Rik,Sp2	SINE	Intron	non_coding_transcript_exon_variant	1	1	96965959	935	downstream	intronic	0	<0.001	<0.001	---	|	1.05307	0.00207	<0.001	0.374	|	0	4	0	0	9	0	0	2	0	0	0	---	0	16	0	0	4	0	0	6	0	0	7	0	0
chr11	96965970	+	A	chr11:96965970	D030028A08Rik,Sp2	SINE	Intron	intron_variant	0	0	96965008	962	upstream	intronic	1.54795	0.00292	<0.001	0.363	|	-1.23411	0.0505	0.119	0.523	|	0	8	0	0	11	0	0	8	0	0	4	0	0	9	0	0	1	0	0	13	0	5	8	0.625	0
chr11	96965974	+	A	chr11:96965974	D030028A08Rik,Sp2	SINE	Intron	intron_variant	0	0	96965006	968	upstream	intronic	0	<0.001	<0.001	---	|	0.266558	0.0352	0.0293	0.184	|	0	8	0	0	11	0	0	7	0	0	4	0	0	9	0	0	1	0	0	13	0	0	8	0	0
chr11	96965977	+	A	chr11:96965977	D030028A08Rik,Sp2	SINE	Intron	intron_variant	0	0	96965003	974	upstream	intronic	-3.5045	<0.001	0.0113	0.0773	|	-0.696116	0.144	0.234	0.437	|	0	8	0	0	10	0	1	8	0.125	0	4	0	2	9	0.222222	0	1	0	1	13	0.0769231	0	12	0	0
chr11	96965978	+	A	chr11:96965978	D030028A08Rik,Sp2	SINE	Intron	intron_variant	0	0	-	-	-	-	0	<0.001	<0.001	---	|	0.458982	0.0268	0.0195	0.821	|	0	8	0	0	11	0	0	8	0	0	4	0	0	9	0	0	1	0	0	13	0	0	12	0	0
chr11	96966000	+	A	chr11:96966000	D030028A08Rik,Sp2	SINE	Intron	intron_variant	0	0	96964981	1019	upstream	intronic	-1.23014	<0.001	0.00235	0.363	|	0.847198	0.0828	0.046	0.541	|	0	6	0	0	4	0	0	5	0	0	4	0	1	6	0.166667	0	0	---	0	13	0	0	12	0	0
chr11	96966012	+	A	chr11:96966012	D030028A08Rik,Sp2	SINE	Intron	intron_variant	0	0	96964969	1043	upstream	intronic	-2.98859	0.00316	0.0251	0.392	|	0.101715	0.685	0.638	0.253	|	3	6	0.5	0	4	0	2	2	1	0	4	0	2	4	0.5	0	1	0	0	11	0	12	12	1	0
chr11	96966022	+	A	chr11:96966022	D030028A08Rik,Sp2	SINE	Intron	intron_variant	0	0	96964959	1063	upstream	intronic	0.467892	0.00316	0.00229	0.842	|	-0.220513	0.238	0.278	0.708	|	0	8	0	0	8	0	0	2	0	0	2	0	1	7	0.142857	0	3	0	0	10	0	9	9	1	0
chr11	96966727	+	A	chr11:96966727	D030028A08Rik,Sp2	SINE	Intron	regulatory_region_variant	0	0	-	-	-	-	1.3968	0.00263	<0.001	0.363	|	0.794495	0.0195	0.0112	0.755	|	0	8	0	0	7	0	0	2	0	0	7	0	0	16	0	0	11	0	0	10	0	2	6	0.333333	0
chr11	97137186	-	T	chr11:97137186	Tbkbp1	.	UTR	3_prime_UTR_variant	0	0	-	-	-	-	0	<0.001	<0.001	---	|	-1.59818	0.0145	0.0439	0.339	|	0	240	0	0	28	0	0	190	0	0	22	0	0	247	0	0	18	0	0	122	0	0	14	0	0
chr11	97328617	+	A	chr11:97328617	Gpr179,Mrpl45	SINE	UTR	3_prime_UTR_variant	1	1	97327433	1184	upstream	intronic	-0.451926	0.00201	0.00276	0.681	|	-0.159997	0.00669	0.00747	0.838	|	0	324	0	1	161	0.00621118	2	195	0.0102564	0	85	0	1	278	0.00359712	2	186	0.0107527	0	390	0	0	154	0	3
chr11	97328630	+	A	chr11:97328630	Gpr179,Mrpl45	SINE	UTR	3_prime_UTR_variant	1	1	97327418	1212	upstream	intronic	-0.273976	<0.001	0.00121	0.363	|	0.790921	0.00258	0.00149	0.546	|	1	320	0.003125	0	141	0	0	191	0	0	77	0	0	282	0	0	181	0	0	373	0	0	142	0	0
chr11	97328664	+	A	chr11:97328664	Gpr179,Mrpl45	SINE	UTR	3_prime_UTR_variant	1	1	97330058	1394	downstream	undefined	-0.967242	<0.001	0.00196	0.179	|	2.71377	0.00994	0.00151	0.0226	|	0	263	0	0	103	0	0	132	0	0	69	0	0	225	0	0	134	0	2	346	0.00578035	0	115	0	2
chr11	97328686	+	A	chr11:97328686	Gpr179,Mrpl45	SINE	UTR	3_prime_UTR_variant	1	1	97329834	1148	downstream	UTR	0	<0.001	<0.001	---	|	0.388785	0.00233	0.00178	0.618	|	0	254	0	0	88	0	0	150	0	0	75	0	0	234	0	0	109	0	0	305	0	0	111	0	0
chr11	97329851	+	A	chr11:97329851	Gpr179,Mrpl45	SINE	UTR	3_prime_UTR_variant	0	0	-	-	-	-	-3.84434	0.0131	0.188	0.088	|	0.409211	0.02	0.015	0.9	|	3	5	0.6	0	7	0	1	7	0.142857	1	5	0.2	1	10	0.1	0	5	0	3	46	0.0652174	11	54	0.203704	9
chr11	97513748	-	T	chr11:97513748	Srcin1	SINE	Intron	intron_variant	1	1	-	-	-	-	0	<0.001	<0.001	---	|	1.58016	0.414	0.138	0.00336	|	0	2	0	0	0	---	0	0	---	---	---	---	0	0	---	0	0	---	---	---	---	0	3	0	0
chr11	97644518	-	T	chr11:97644518	Gm11613	SINE	Exon	non_coding_transcript_exon_variant	0	0	-	-	-	-	-5.71279	<0.001	0.0524	0.0178	|	2.4479	0.0122	0.00223	0.118	|	2	28	0.0714286	0	2	0	1	8	0.125	0	3	0	2	15	0.133333	0	2	0	0	18	0	---	---	---	1
chr11	97644534	-	T	chr11:97644534	Gm11613	SINE	Exon	non_coding_transcript_exon_variant	0	0	-	-	-	-	-3.25524	0.0549	0.524	0.266	|	1.66951	0.227	0.0713	0.356	|	13	24	0.541667	1	1	1	5	10	0.5	4	4	1	4	13	0.307692	1	2	0.5	5	19	0.263158	---	---	---	2
chr11	97644539	-	T	chr11:97644539	Gm11613	SINE	Exon	non_coding_transcript_exon_variant	0	0	97643966	573	downstream	undefined	-2.82313	0.012	0.085	0.458	|	3.11579	0.126	0.0145	0.16	|	6	24	0.25	0	0	---	0	11	0	2	4	0.5	3	13	0.230769	1	2	0.5	1	20	0.05	---	---	---	1
chr11	97644549	-	T	chr11:97644549	Gm11613	SINE	Exon	non_coding_transcript_exon_variant	0	0	97643956	593	downstream	undefined	-5.56752	0.0158	0.752	0.102	|	0.19728	0.267	0.233	0.765	|	17	21	0.809524	0	0	---	5	9	0.555556	4	4	1	8	15	0.533333	2	2	1	15	19	0.789474	---	---	---	3
chr11	97644551	-	T	chr11:97644551	Gm11613	SINE	Exon	non_coding_transcript_exon_variant	0	0	97643955	596	downstream	undefined	-0.930127	0.012	0.0229	0.781	|	0.550154	0.0327	0.0223	0.0612	|	4	21	0.190476	0	0	---	0	12	0	2	4	0.5	2	13	0.153846	1	2	0.5	8	19	0.421053	---	---	---	0
chr11	97644574	-	T	chr11:97644574	Gm11613	SINE	Intron	non_coding_transcript_variant	0	0	97644819	245	upstream	intronic	-2.56046	0.00347	0.0204	0.472	|	1.76135	0.0635	0.0187	0.405	|	3	14	0.214286	0	1	0	0	12	0	2	4	0.5	1	16	0.0625	0	1	0	3	21	0.142857	---	---	---	0
chr11	97644587	-	T	chr11:97644587	Gm11613	SINE	Intron	non_coding_transcript_variant	0	0	97643529	1058	downstream	undefined	-3.17514	0.015	0.135	0.313	|	1.39683	0.0444	0.0169	0.407	|	1	14	0.0714286	1	1	1	1	12	0.0833333	3	4	0.75	1	11	0.0909091	0	2	0	3	20	0.15	---	---	---	1
chr11	97644596	-	T	chr11:97644596	Gm11613	SINE	Intron	non_coding_transcript_variant	0	0	97647080	2484	upstream	intronic	-2.78184	<0.001	0.00688	0.181	|	-0.51574	0.0293	0.0419	0.801	|	0	13	0	0	1	0	0	13	0	0	3	0	1	13	0.0769231	0	2	0	1	16	0.0625	---	---	---	0
chr11	97644607	-	T	chr11:97644607	Gm11613	SINE	Intron	regulatory_region_variant	0	0	97647072	2465	upstream	intronic	-0.924298	0.219	0.415	0.681	|	-0.259369	0.132	0.158	0.542	|	9	12	0.75	1	1	1	2	13	0.153846	3	3	1	7	14	0.5	1	2	0.5	5	14	0.357143	---	---	---	2
chr11	97644612	-	T	chr11:97644612	Gm11613	SINE	Intron	regulatory_region_variant	0	0	97647066	2454	upstream	intronic	-5.4277	0.0138	0.594	0.113	|	0.72795	0.251	0.152	0.0317	|	11	13	0.846154	0	1	0	2	12	0.166667	3	3	1	10	14	0.714286	1	2	0.5	8	13	0.615385	---	---	---	5
chr11	97644613	-	T	chr11:97644613	Gm11613	SINE	Intron	regulatory_region_variant	1	1	97647064	2451	upstream	intronic	-1.50048	0.251	0.711	0.523	|	0.595015	0.643	0.426	0.35	|	11	13	0.846154	1	1	1	3	12	0.25	3	3	1	12	14	0.857143	2	2	1	9	12	0.75	---	---	---	5
chr11	97644811	-	T	chr11:97644811	Gm11613	SINE	Intron	regulatory_region_variant	0	0	97645385	574	upstream	Exon	-3.33443	0.00347	0.035	0.124	|	-0.780655	0.0388	0.0667	0.639	|	4	24	0.166667	2	4	0.5	1	14	0.0714286	0	0	---	2	19	0.105263	0	0	---	1	14	0.0714286	---	---	---	0
chr11	97644821	-	T	chr11:97644821	Gm11613	SINE	Intron	regulatory_region_variant	0	0	-	-	-	-	-3.87515	0.00347	0.0509	0.114	|	-3.03042	0.0156	0.128	0.151	|	6	28	0.214286	2	4	0.5	1	14	0.0714286	0	0	---	1	21	0.047619	0	0	---	2	13	0.153846	---	---	---	0
chr11	97644840	-	T	chr11:97644840	Gm11613	SINE	Intron	regulatory_region_variant	0	0	97644559	281	downstream	exonic	-7.50343	<0.001	0.181	4.78e-05	|	1.15479	0.0964	0.0433	0.537	|	10	41	0.243902	0	1	0	1	15	0.0666667	0	0	---	11	31	0.354839	0	1	0	0	12	0	---	---	---	4
chr11	97644853	-	T	chr11:97644853	Gm11613	SINE	Intron	splice_region_variant	0	0	97644544	309	downstream	exonic	-1.99168	0.00398	0.0158	0.349	|	-2.09405	0.0198	0.0846	0.174	|	6	43	0.139535	1	1	1	2	17	0.117647	0	0	---	2	33	0.0606061	0	1	0	1	19	0.0526316	---	---	---	0
chr11	97644856	-	T	chr11:97644856	Gm11613	SINE	Intron	splice_region_variant	1	1	-	-	-	-	-3.00719	0.0561	0.451	0.247	|	0.0663947	0.465	0.444	0.878	|	24	40	0.6	1	1	1	3	16	0.1875	0	0	---	15	31	0.483871	1	1	1	8	18	0.444444	---	---	---	12
chr11	97644857	-	T	chr11:97644857	Gm11613	SINE	Intron	splice_donor_variant	0	0	-	-	-	-	-4.63709	0.00398	0.0991	0.119	|	-0.330696	0.144	0.18	0.628	|	11	41	0.268293	0	1	0	0	17	0	0	0	---	7	30	0.233333	1	1	1	4	18	0.222222	---	---	---	8
chr11	97644864	-	T	chr11:97644864	Gm11613	SINE	Exon	regulatory_region_variant	1	1	-	-	-	-	-3.51192	0.0506	0.578	0.197	|	-0.131567	0.403	0.441	0.683	|	27	43	0.627907	1	1	1	6	16	0.375	0	0	---	21	33	0.636364	1	1	1	8	17	0.470588	---	---	---	13
chr11	97644874	-	T	chr11:97644874	Gm11613	SINE	Exon	regulatory_region_variant	0	0	-	-	-	-	-3.82116	0.0158	0.224	0.175	|	0.409535	0.0602	0.0453	0.713	|	12	45	0.266667	1	1	1	3	19	0.157895	0	0	---	9	31	0.290323	1	1	1	0	18	0	---	---	---	4
chr11	97645037	-	T	chr11:97645037	Gm11613	SINE	Exon	regulatory_region_variant	1	1	-	-	-	-	-3.91061	<0.001	0.015	0.0709	|	0.623619	0.142	0.0924	0.371	|	2	26	0.0769231	0	2	0	2	24	0.0833333	0	1	0	3	25	0.12	0	3	0	0	19	0	0	12	0	0
chr11	97645528	-	T	chr11:97645528	Gm11613	SINE	Exon	regulatory_region_variant	0	0	97647956	2428	upstream	intronic	-2.692	0.00562	0.0363	0.356	|	1.1382	0.0558	0.0253	0.59	|	5	34	0.147059	2	2	1	1	22	0.0454545	0	1	0	6	23	0.26087	0	0	---	2	11	0.181818	---	---	---	0
chr11	97645558	-	T	chr11:97645558	Gm11613	SINE	Exon	regulatory_region_variant	0	0	97646463	905	upstream	exonic	-0.919518	0.0316	0.0598	0.733	|	3.41479	0.179	0.0168	0.159	|	9	25	0.36	2	2	1	2	15	0.133333	1	1	1	4	15	0.266667	0	0	---	0	3	0	---	---	---	---
chr11	97645562	-	T	chr11:97645562	Gm11613	SINE	Exon	regulatory_region_variant	0	0	97646459	897	upstream	exonic	-1.01074	0.0266	0.0536	0.692	|	2.40299	0.221	0.0418	0.207	|	6	24	0.25	1	2	0.5	2	13	0.153846	1	1	1	3	14	0.214286	0	0	---	0	3	0	---	---	---	---
chr11	97645568	-	T	chr11:97645568	Gm11613	SINE	Exon	regulatory_region_variant	0	0	97647915	2347	upstream	intronic	-0.830482	0.00508	0.00904	0.704	|	-0.639053	0.00804	0.0125	0.802	|	2	25	0.08	2	3	0.666667	1	12	0.0833333	0	1	0	0	13	0	0	0	---	0	3	0	---	---	---	---
chr11	97645602	-	T	chr11:97645602	Gm11613	SINE	Exon	regulatory_region_variant	0	0	97646419	817	upstream	exonic	-5.72603	0.00562	0.298	0.0949	|	0.767858	0.417	0.245	0.213	|	10	26	0.384615	5	5	1	2	7	0.285714	0	0	---	5	14	0.357143	0	0	---	2	2	1	---	---	---	---
chr11	97645612	-	T	chr11:97645612	Gm11613	SINE	Exon	TF_binding_site_variant	0	0	97646409	797	upstream	exonic	-5.44041	0.00562	0.244	0.0947	|	1.61654	0.173	0.0564	0.438	|	12	30	0.4	5	5	1	2	9	0.222222	0	0	---	3	15	0.2	0	1	0	1	1	1	---	---	---	---
chr11	97645622	-	T	chr11:97645622	Gm11613	SINE	Exon	TF_binding_site_variant	0	0	97646399	777	upstream	exonic	-5.57362	0.00495	0.236	0.0861	|	3.86818	0.275	0.0189	0.103	|	7	24	0.291667	3	5	0.6	2	9	0.222222	0	0	---	4	14	0.285714	0	1	0	1	1	1	---	---	---	---
chr11	97645623	-	T	chr11:97645623	Gm11613	SINE	Exon	TF_binding_site_variant	0	0	97648054	2431	upstream	intronic	-2.7964	0.00562	0.0391	0.429	|	3.73026	0.0342	0.00258	0.238	|	1	23	0.0434783	5	5	1	2	8	0.25	0	0	---	3	14	0.214286	0	1	0	1	1	1	---	---	---	---
chr11	97645634	-	T	chr11:97645634	Gm11613	SINE	Exon	regulatory_region_variant	0	0	97646389	755	upstream	exonic	-2.98558	0.00544	0.0431	0.322	|	0.762639	0.0604	0.0356	0.766	|	5	33	0.151515	7	8	0.875	1	11	0.0909091	0	3	0	4	16	0.25	0	2	0	1	1	1	---	---	---	---
chr11	97646411	-	T	chr11:97646411	Gm11613	SINE	Exon	non_coding_transcript_exon_variant	0	0	97645611	800	downstream	exonic	-7.6353	<0.001	0.199	0.000738	|	0.0427413	0.151	0.147	0.956	|	13	40	0.325	0	0	---	2	22	0.0909091	0	0	---	11	26	0.423077	0	0	---	10	14	0.714286	---	---	---	---
chr11	97646420	-	T	chr11:97646420	Gm11613	SINE	Exon	non_coding_transcript_exon_variant	0	0	97645601	819	downstream	exonic	-7.81211	<0.001	0.225	0.000125	|	-0.881809	0.0855	0.158	0.657	|	9	35	0.257143	0	0	---	5	21	0.238095	0	0	---	8	24	0.333333	0	0	---	0	14	0	---	---	---	---
chr11	97646421	-	T	chr11:97646421	Gm11613	SINE	Exon	non_coding_transcript_exon_variant	0	0	97645600	821	downstream	exonic	-8.09077	<0.001	0.273	0.000346	|	-0.148933	0.175	0.194	0.87	|	14	33	0.424242	0	0	---	5	22	0.227273	0	0	---	11	24	0.458333	0	0	---	10	14	0.714286	---	---	---	---
chr11	97646430	-	T	chr11:97646430	Gm11613	SINE	Exon	non_coding_transcript_exon_variant	0	0	97645591	839	downstream	exonic	-5.27341	0.00562	0.217	0.176	|	1.003	0.21	0.105	0.149	|	12	36	0.333333	0	0	---	2	26	0.0769231	1	1	1	8	25	0.32	0	0	---	0	15	0	---	---	---	---
chr11	97646431	-	T	chr11:97646431	Gm11613	SINE	Exon	non_coding_transcript_exon_variant	0	0	97646851	420	upstream	intronic	-3.2653	<0.001	0.00962	0.186	|	-2.83773	0.00458	0.0327	0.14	|	2	36	0.0555556	0	0	---	0	26	0	0	1	0	4	26	0.153846	0	0	---	0	15	0	---	---	---	---
chr11	97646440	-	T	chr11:97646440	Gm11613	SINE	Exon	non_coding_transcript_exon_variant	0	0	97646842	402	upstream	intronic	-2.42659	0.00562	0.0302	0.469	|	0.08191	0.0212	0.0201	0.957	|	6	38	0.157895	0	1	0	1	27	0.037037	1	1	1	4	28	0.142857	0	2	0	1	17	0.0588235	---	---	---	---
chr11	97646449	-	T	chr11:97646449	Gm11613	SINE	Exon	non_coding_transcript_exon_variant	0	0	97645572	877	downstream	exonic	-4.6281	0.00562	0.139	0.172	|	1.26455	0.101	0.042	0.402	|	2	36	0.0555556	0	1	0	3	24	0.125	1	1	1	7	26	0.269231	0	2	0	0	19	0	---	---	---	---
chr11	97646452	-	T	chr11:97646452	Gm11613	SINE	Exon	non_coding_transcript_exon_variant	0	0	97645568	884	downstream	exonic	1.14056	0.0316	0.0143	0.651	|	1.93647	0.0125	0.00326	0.146	|	1	35	0.0285714	0	1	0	1	25	0.04	1	1	1	1	27	0.037037	2	2	1	1	20	0.05	---	---	---	---
chr11	97646495	-	T	chr11:97646495	Gm11613	SINE	Exon	non_coding_transcript_exon_variant	0	0	97645526	969	downstream	exonic	-2.61564	0.024	0.147	0.368	|	-0.256713	0.0539	0.0644	0.821	|	4	33	0.121212	1	1	1	1	23	0.0434783	0	3	0	11	29	0.37931	2	6	0.333333	1	9	0.111111	---	---	---	---
chr11	97646496	-	T	chr11:97646496	Gm11613	SINE	Exon	non_coding_transcript_exon_variant	0	0	97645525	971	downstream	exonic	-3.62105	0.017	0.209	0.204	|	1.15861	0.0127	0.00567	0.426	|	4	32	0.125	0	1	0	5	22	0.227273	1	2	0.5	8	28	0.285714	1	6	0.166667	0	9	0	---	---	---	---
chr11	97843174	+	A	chr11:97843174	B230217C12Rik,Lasp1	SINE	UTR	3_prime_UTR_variant	1	1	-	-	-	-	0	<0.001	<0.001	---	|	1.00232	0.002	<0.001	0.374	|	0	0	---	0	0	---	0	0	---	0	0	---	0	0	---	0	0	---	0	0	---	0	2	0	0
chr11	97843182	+	A	chr11:97843182	B230217C12Rik,Lasp1	SINE	UTR	3_prime_UTR_variant	0	0	97843192	10	downstream	UTR	0	<0.001	<0.001	---	|	0.403522	0.0128	0.00968	0.842	|	0	0	---	0	0	---	0	0	---	0	0	---	0	0	---	0	0	---	0	0	---	0	2	0	0
chr11	97843183	+	A	chr11:97843183	B230217C12Rik,Lasp1	SINE	UTR	3_prime_UTR_variant	1	1	97843191	8	downstream	UTR	0	<0.001	<0.001	---	|	0.14179	0.00286	0.00259	0.954	|	0	0	---	0	0	---	0	0	---	0	0	---	0	0	---	0	0	---	0	0	---	0	2	0	0
chr11	97843725	+	A	chr11:97843725	B230217C12Rik,Lasp1	SINE	UTR	3_prime_UTR_variant	0	0	-	-	-	-	0	<0.001	<0.001	---	|	-0.720687	0.0198	0.0327	0.816	|	0	0	---	0	0	---	0	0	---	0	0	---	0	2	0	0	0	---	0	0	---	0	0	---	0
chr11	97843728	+	A	chr11:97843728	B230217C12Rik,Lasp1	SINE	UTR	3_prime_UTR_variant	0	0	-	-	-	-	0	<0.001	<0.001	---	|	-1.57918	0.0185	0.0554	0.478	|	0	0	---	0	0	---	0	0	---	0	0	---	0	2	0	0	0	---	0	0	---	0	0	---	0
chr11	97845741	+	A	chr11:97845741	B230217C12Rik	SINE	intergenic	downstream_gene_variant	1	1	-	-	-	-	0	<0.001	<0.001	---	|	0.0134228	0.00217	0.00215	0.994	|	0	1	0	0	0	---	0	1	0	0	0	---	0	1	0	0	0	---	0	4	0	0	0	---	0
chr11	97845748	+	A	chr11:97845748	B230217C12Rik	SINE	intergenic	downstream_gene_variant	1	1	-	-	-	-	0	<0.001	<0.001	---	|	1.75765	0.0186	0.00552	0.489	|	0	1	0	0	0	---	0	1	0	0	0	---	0	1	0	0	0	---	0	0	---	0	0	---	0
chr11	98083286	-	T	chr11:98083286	Fbxl20,Gm11632	.	UTR	regulatory_region_variant	0	0	-	-	-	-	-0.565988	<0.001	0.00148	0.363	|	-1.68586	0.00633	0.0204	0.263	|	0	109	0	0	21	0	0	112	0	0	12	0	0	138	0	0	23	0	0	322	0	0	108	0	0
chr11	98277993	+	A	chr11:98277993	Cdk12,n-R5s73	SINE	intergenic	non_coding_transcript_exon_variant	1	1	-	-	-	-	0	<0.001	<0.001	---	|	-0.449315	0.0411	0.0561	0.805	|	0	59	0	0	18	0	0	90	0	0	25	0	0	75	0	0	17	0	0	77	0	0	12	0	0
chr11	98279020	+	A	chr11:98279020	Cdk12	SINE	intergenic	downstream_gene_variant	0	0	-	-	-	-	-0.710891	<0.001	0.00164	0.363	|	-2.32907	0.00715	0.036	0.262	|	0	89	0	0	16	0	2	104	0.0192308	0	27	0	0	109	0	0	14	0	0	70	0	0	14	0	0
chr11	98766091	+	A	chr11:98766091	Nr1d1,Thra	Simple	Intron	intron_variant	0	0	-	-	-	-	-1.84978	<0.001	0.0036	0.175	|	3.57555	0.028	0.00235	0.0706	|	1	24	0.0416667	0	21	0	0	18	0	0	9	0	1	19	0.0526316	0	8	0	0	8	0	0	10	0	0
chr11	98766092	+	A	chr11:98766092	Nr1d1,Thra	Simple	Intron	intron_variant	1	1	-	-	-	-	-2.05074	0.0019	0.00789	0.139	|	0.612393	0.508	0.332	0.0667	|	2	23	0.0869565	1	21	0.047619	1	19	0.0526316	0	9	0	1	19	0.0526316	0	8	0	0	9	0	0	10	0	0
chr11	98766094	+	A	chr11:98766094	Nr1d1,Thra	Simple	Intron	intron_variant	0	0	-	-	-	-	0	<0.001	<0.001	---	|	1.47932	0.107	0.0382	0.433	|	0	22	0	0	20	0	0	19	0	0	9	0	0	17	0	0	8	0	0	8	0	0	10	0	0
chr11	98829676	+	A	chr11:98829676	Casc3	SINE	Intron	regulatory_region_variant	0	0	98830967	1291	downstream	intronic	0.886988	0.00185	<0.001	0.363	|	-0.223095	0.00238	0.00278	0.923	|	0	50	0	0	86	0	0	24	0	1	25	0.04	0	39	0	0	46	0	0	17	0	0	0	---	0
chr11	98829686	+	A	chr11:98829686	Casc3	LTR	Intron	regulatory_region_variant	0	0	98830781	1095	downstream	intronic	0	<0.001	<0.001	---	|	1.23169	0.00235	<0.001	0.374	|	0	57	0	0	89	0	0	25	0	0	28	0	0	39	0	0	45	0	0	16	0	0	0	---	0
chr11	98829687	+	A	chr11:98829687	Casc3	LTR	Intron	regulatory_region_variant	1	1	98830781	1094	downstream	intronic	1.56667	0.00596	0.00201	0.435	|	1.61773	0.0762	0.0248	0.623	|	0	56	0	5	87	0.0574713	0	25	0	1	29	0.0344828	0	40	0	1	44	0.0227273	1	15	0.0666667	0	0	---	0
chr11	98829696	+	A	chr11:98829696	Casc3	LTR	Intron	regulatory_region_variant	0	0	98830770	1074	downstream	intronic	0.514697	0.0144	0.0101	0.81	|	0.0979062	0.743	0.694	0.809	|	0	55	0	17	89	0.191011	4	20	0.2	7	31	0.225806	1	38	0.0263158	11	53	0.207547	4	20	0.2	0	0	---	0
chr11	98829698	+	A	chr11:98829698	Casc3	LTR	Intron	regulatory_region_variant	1	1	98830769	1071	downstream	intronic	2.61341	0.00612	<0.001	0.0758	|	-0.153907	0.105	0.117	0.955	|	0	55	0	4	91	0.043956	0	21	0	1	31	0.0322581	0	38	0	2	54	0.037037	0	20	0	0	0	---	0
chr11	98829702	+	A	chr11:98829702	Casc3	LTR	Intron	regulatory_region_variant	0	0	98830764	1062	downstream	intronic	0.568533	0.00148	<0.001	0.363	|	-1.21178	<0.001	0.00232	0.374	|	0	51	0	1	94	0.0106383	0	21	0	0	31	0	0	35	0	0	49	0	0	20	0	0	0	---	0
chr11	98829703	+	A	chr11:98829703	Casc3	LTR	Intron	regulatory_region_variant	1	1	98830763	1060	downstream	intronic	1.43729	0.00529	0.00195	0.453	|	-0.0719305	0.32	0.337	0.915	|	0	51	0	1	92	0.0108696	0	21	0	1	31	0.0322581	0	36	0	3	48	0.0625	1	18	0.0555556	0	0	---	0
chr11	98829759	+	A	chr11:98829759	Casc3	LTR	Intron	regulatory_region_variant	1	1	98830708	949	downstream	intronic	0	<0.001	<0.001	---	|	-3.27452	0.00235	0.0227	0.138	|	0	51	0	0	107	0	0	29	0	0	34	0	0	41	0	0	49	0	0	14	0	0	1	0	0
chr11	98830887	+	A	chr11:98830887	Casc3	SINE	Intron	intron_variant	0	0	-	-	-	-	3.09685	0.00856	<0.001	0.0762	|	1.85754	0.012	0.00331	0.604	|	0	29	0	0	36	0	0	16	0	2	20	0.1	0	24	0	2	30	0.0666667	0	11	0	1	17	0.0588235	0
chr11	98830888	+	A	chr11:98830888	Casc3	SINE	Intron	intron_variant	0	0	98829755	1133	upstream	Intron	2.11712	0.00434	<0.001	0.175	|	0.308864	0.0506	0.0409	0.941	|	0	29	0	0	35	0	0	16	0	2	20	0.1	0	22	0	2	30	0.0666667	0	11	0	0	17	0	0
chr11	98842922	+	A	chr11:98842922	Rapgefl1	SINE	Intron	intron_variant	1	1	-	-	-	-	0	<0.001	<0.001	---	|	4.77257	0.0273	<0.001	0.0167	|	0	2	0	0	11	0	0	0	---	0	9	0	0	3	0	0	3	0	0	0	---	0	3	0	0
chr11	98844288	+	A	chr11:98844288	Rapgefl1	SINE	Intron	intron_variant	0	0	98845249	961	downstream	intronic	1.04422	0.00206	<0.001	0.363	|	2.38861	0.445	0.085	0.183	|	0	5	0	1	13	0.0769231	0	1	0	0	7	0	0	0	---	0	5	0	0	18	0	0	43	0	0
chr11	98901330	+	A	chr11:98901330	Wipf2	SINE	UTR	3_prime_UTR_variant	0	0	98899468	1862	upstream	intronic	3.14073	0.0155	0.00176	0.0905	|	1.20217	0.0427	0.0186	0.642	|	2	67	0.0298507	2	75	0.0266667	0	63	0	2	52	0.0384615	0	61	0	3	73	0.0410959	0	19	0	0	12	0	0
chr11	99213685	-	T	chr11:99213685	Smarce1	SINE	Intron	intron_variant	0	0	99215796	2111	upstream	intronic	3.17161	0.00901	<0.001	0.0251	|	2.25233	0.00476	<0.001	0.179	|	0	15	0	7	243	0.0288066	0	17	0	4	137	0.0291971	0	40	0	6	221	0.0271493	0	10	0	3	128	0.0234375	0
chr11	100437179	-	T	chr11:100437179	Klhl10,Nt5c3b	SINE	Intron	non_coding_transcript_variant	0	0	-	-	-	-	0	<0.001	<0.001	---	|	3.11061	0.00864	<0.001	0.178	|	0	4	0	0	0	---	0	9	0	0	0	---	0	11	0	0	0	---	0	4	0	0	6	0	0
chr11	100458539	-	T	chr11:100458539	Klhl10,Klhl11	.	intergenic	downstream_gene_variant	0	0	-	-	-	-	-2.00561	0.00259	0.0104	0.247	|	-0.293026	0.00283	0.00347	0.783	|	2	61	0.0327869	0	47	0	2	46	0.0434783	0	29	0	3	85	0.0352941	0	61	0	1	40	0.025	6	20	0.3	0
chr11	100499365	-	T	chr11:100499365	Acly	SINE	Intron	intron_variant	0	0	-	-	-	-	1.41339	0.00266	<0.001	0.363	|	0.387578	0.053	0.0405	0.86	|	0	8	0	0	37	0	0	7	0	0	16	0	0	14	0	0	13	0	0	5	0	5	14	0.357143	0
chr11	100499702	-	T	chr11:100499702	Acly	SINE	Intron	intron_variant	0	0	-	-	-	-	0	<0.001	<0.001	---	|	1.58758	0.206	0.0687	0.427	|	0	1	0	0	19	0	0	8	0	0	14	0	0	8	0	0	8	0	0	0	---	0	8	0	0
chr11	100501674	-	T	chr11:100501674	Acly	SINE	Intron	intron_variant	1	1	-	-	-	-	1.94103	0.00384	<0.001	0.175	|	0.607635	0.84	0.551	0.0124	|	0	25	0	3	48	0.0625	0	26	0	2	39	0.0512821	0	18	0	0	39	0	0	7	0	0	3	0	0
chr11	100501751	-	T	chr11:100501751	Acly	SINE	Intron	intron_variant	1	1	-	-	-	-	1.8159	0.00352	<0.001	0.181	|	2.10959	0.178	0.0413	0.133	|	0	15	0	1	42	0.0238095	0	15	0	0	40	0	0	14	0	2	25	0.08	0	9	0	0	6	0	0
chr11	100501902	-	T	chr11:100501902	Acly	SINE	Intron	intron_variant	0	0	-	-	-	-	0	<0.001	<0.001	---	|	6.27147	0.198	0.00257	0.0184	|	0	12	0	0	21	0	0	2	0	0	7	0	0	8	0	0	13	0	0	2	0	0	0	---	0
chr11	100587531	-	T	chr11:100587531	Cnp,Dnajc7	SINE	Intron	non_coding_transcript_variant	0	0	-	-	-	-	0	<0.001	<0.001	---	|	1.30299	0.0707	0.0287	0.591	|	0	21	0	0	18	0	0	20	0	0	7	0	0	9	0	0	17	0	0	12	0	0	0	---	0
chr11	100597966	-	T	chr11:100597966	Dnajc7	SINE	Intron	regulatory_region_variant	1	1	-	-	-	-	-0.488727	<0.001	0.0014	0.363	|	-0.233943	0.0763	0.0898	0.641	|	1	131	0.00763359	0	19	0	0	92	0	0	10	0	0	127	0	0	29	0	0	67	0	0	36	0	0
chr11	101031689	+	A	chr11:101031689	Atp6v0a1,Mir6928	SINE	Intron	TF_binding_site_variant	0	0	-	-	-	-	1.27398	0.00242	<0.001	0.363	|	5.45393	0.302	0.0069	0.0289	|	0	6	0	0	11	0	0	1	0	1	5	0.2	0	5	0	0	3	0	0	5	0	0	0	---	0
chr11	101031690	+	A	chr11:101031690	Atp6v0a1,Mir6928	SINE	Intron	non_coding_transcript_variant	0	0	-	-	-	-	1.08439	0.00212	<0.001	0.363	|	4.726	0.178	0.00674	0.0893	|	0	6	0	1	11	0.0909091	0	1	0	0	5	0	0	5	0	0	3	0	0	5	0	0	0	---	0
chr11	101031725	+	A	chr11:101031725	Atp6v0a1,Mir6928	SINE	Intron	non_coding_transcript_variant	0	0	101033264	1539	downstream	intronic	-2.68737	<0.001	0.00644	0.178	|	5.58599	0.47	0.00979	0.0539	|	1	7	0.142857	0	9	0	0	1	0	0	2	0	0	6	0	0	4	0	0	2	0	0	0	---	2
chr11	101031726	+	A	chr11:101031726	Atp6v0a1,Mir6928	SINE	Intron	non_coding_transcript_variant	0	0	101033264	1538	downstream	intronic	-0.0974938	0.00263	0.00282	0.967	|	3.68183	0.552	0.043	0.17	|	0	7	0	3	9	0.333333	0	1	0	0	2	0	0	6	0	0	4	0	0	2	0	0	0	---	2
chr11	101052052	+	A	chr11:101052052	Atp6v0a1	SINE	Intron	intron_variant	1	1	-	-	-	-	0	<0.001	<0.001	---	|	2.48653	0.221	0.0395	0.075	|	0	56	0	0	0	---	0	44	0	0	0	---	0	58	0	0	0	---	0	7	0	0	0	---	0
chr11	101052067	+	A	chr11:101052067	Atp6v0a1	SINE	Intron	intron_variant	1	1	101054363	2296	downstream	intronic	-1.13264	<0.001	0.00219	0.363	|	0.717312	0.742	0.451	0.108	|	0	60	0	0	0	---	0	40	0	0	0	---	0	59	0	0	0	---	1	9	0.111111	0	0	---	0
chr11	101052077	+	A	chr11:101052077	Atp6v0a1	SINE	Intron	intron_variant	1	1	-	-	-	-	0	<0.001	<0.001	---	|	0.692596	0.0206	0.0127	0.703	|	0	57	0	0	0	---	0	38	0	0	0	---	0	55	0	0	0	---	0	11	0	0	0	---	0
chr11	101052081	+	A	chr11:101052081	Atp6v0a1	SINE	Intron	intron_variant	1	1	101054349	2268	downstream	intronic	-1.76492	<0.001	0.0034	0.188	|	0.795589	0.534	0.307	0.00629	|	0	59	0	0	0	---	0	39	0	0	0	---	1	59	0.0169492	0	0	---	1	11	0.0909091	0	0	---	0
chr11	101054585	+	A	chr11:101054585	Atp6v0a1	SINE	Intron	intron_variant	1	1	-	-	-	-	0	<0.001	<0.001	---	|	4.71008	0.0262	<0.001	0.021	|	0	50	0	0	0	---	0	45	0	0	0	---	0	52	0	0	1	0	0	24	0	0	0	---	0
chr11	101192196	-	T	chr11:101192196	Cntnap1,Ezh1	.	UTR	regulatory_region_variant	0	0	-	-	-	-	2.97895	0.0121	0.00153	0.0558	|	0	<0.001	<0.001	---	|	0	221	0	2	34	0.0588235	0	234	0	0	71	0	0	275	0	4	60	0.0666667	5	384	0.0130208	1	38	0.0263158	0
chr11	101198236	-	T	chr11:101198236	Ezh1	SINE	UTR	3_prime_UTR_variant	0	0	-	-	-	-	0	<0.001	<0.001	---	|	-3.61432	0.0017	0.0208	0.0329	|	0	24	0	0	16	0	0	17	0	0	12	0	0	25	0	0	17	0	0	27	0	0	37	0	0
chr11	101198281	-	T	chr11:101198281	Ezh1	SINE	UTR	3_prime_UTR_variant	1	1	-	-	-	-	2.31404	0.00497	<0.001	0.175	|	1.87428	0.0298	0.00813	0.136	|	0	30	0	0	17	0	0	25	0	0	11	0	0	30	0	0	21	0	0	62	0	0	67	0	0
chr11	101198293	-	T	chr11:101198293	Ezh1	SINE	UTR	3_prime_UTR_variant	0	0	101198902	609	upstream	UTR	0.97275	0.00196	<0.001	0.363	|	0.674713	0.129	0.0808	0.111	|	0	30	0	0	15	0	0	30	0	0	11	0	0	35	0	0	26	0	0	77	0	0	67	0	0
chr11	101198300	-	T	chr11:101198300	Ezh1	SINE	UTR	3_prime_UTR_variant	1	1	101198896	596	upstream	UTR	-0.723118	0.139	0.23	0.58	|	0.271258	0.667	0.553	0.225	|	3	28	0.107143	0	14	0	7	28	0.25	2	11	0.181818	7	36	0.194444	10	26	0.384615	19	76	0.25	24	64	0.375	16
chr11	101198681	-	T	chr11:101198681	Ezh1	SINE	UTR	3_prime_UTR_variant	1	1	101197294	1387	downstream	intronic	-0.780064	<0.001	0.00172	0.363	|	2.57414	0.0134	0.00225	0.0985	|	1	39	0.025641	0	41	0	0	42	0	0	50	0	0	44	0	0	35	0	0	102	0	0	30	0	0
chr11	101198731	-	T	chr11:101198731	Ezh1	SINE	UTR	3_prime_UTR_variant	1	1	-	-	-	-	0	<0.001	<0.001	---	|	1.58027	0.253	0.0847	0.00593	|	0	38	0	0	31	0	0	43	0	0	46	0	0	44	0	0	25	0	0	75	0	0	36	0	0
chr11	101198732	-	T	chr11:101198732	Ezh1	SINE	UTR	3_prime_UTR_variant	0	0	-	-	-	-	1.00193	0.002	<0.001	0.363	|	0.317793	0.0572	0.0459	0.659	|	0	37	0	2	31	0.0645161	0	44	0	0	47	0	0	44	0	0	26	0	0	75	0	0	36	0	0
chr11	101198762	-	T	chr11:101198762	Ezh1	SINE	UTR	3_prime_UTR_variant	1	1	101197221	1541	downstream	intronic	-1.8482	<0.001	0.0036	0.176	|	1.8181	0.0124	0.00352	0.425	|	2	34	0.0588235	0	28	0	0	35	0	0	33	0	0	40	0	0	25	0	0	57	0	0	32	0	1
chr11	101198771	-	T	chr11:101198771	Ezh1	SINE	UTR	3_prime_UTR_variant	0	0	-	-	-	-	-0.79931	<0.001	0.00174	0.363	|	0.760982	0.133	0.0785	0.278	|	0	33	0	0	26	0	1	36	0.0277778	0	31	0	0	39	0	0	22	0	0	48	0	0	30	0	0
chr11	101198777	-	T	chr11:101198777	Ezh1	SINE	UTR	3_prime_UTR_variant	1	1	-	-	-	-	0	<0.001	<0.001	---	|	2.0207	0.0133	0.00327	0.275	|	0	32	0	0	23	0	0	33	0	0	27	0	0	35	0	0	19	0	0	36	0	0	27	0	0
chr11	101198809	-	T	chr11:101198809	Ezh1	.	UTR	3_prime_UTR_variant	0	0	-	-	-	-	0	<0.001	<0.001	---	|	1.94094	0.0628	0.0163	0.138	|	0	40	0	0	17	0	0	38	0	0	22	0	0	35	0	0	26	0	0	39	0	0	36	0	0
chr11	101198810	-	T	chr11:101198810	Ezh1	.	UTR	3_prime_UTR_variant	0	0	-	-	-	-	-1.99111	<0.001	0.00398	0.175	|	1.22608	0.138	0.0591	0.0932	|	2	40	0.05	0	17	0	0	38	0	0	22	0	0	35	0	0	26	0	3	38	0.0789474	0	37	0	0
chr11	101198811	-	T	chr11:101198811	Ezh1	.	UTR	3_prime_UTR_variant	0	0	-	-	-	-	-1.05047	<0.001	0.00207	0.363	|	1.31543	0.209	0.084	0.0778	|	0	38	0	0	16	0	0	35	0	0	22	0	0	33	0	0	25	0	3	38	0.0789474	0	37	0	0
chr11	101198873	-	T	chr11:101198873	Ezh1	SINE	UTR	3_prime_UTR_variant	0	0	-	-	-	-	2.91236	0.015	0.00199	0.218	|	4.51214	0.037	0.00162	0.00378	|	0	37	0	1	38	0.0263158	2	32	0.0625	0	30	0	0	31	0	7	35	0.2	0	30	0	2	25	0.08	0
chr11	101198903	-	T	chr11:101198903	Ezh1	SINE	UTR	3_prime_UTR_variant	1	1	101198292	611	downstream	UTR	1.89394	0.00372	<0.001	0.179	|	0.24533	0.104	0.0878	0.58	|	0	40	0	4	46	0.0869565	0	36	0	0	30	0	0	36	0	0	35	0	0	26	0	0	26	0	0
chr11	101198908	-	T	chr11:101198908	Ezh1	SINE	UTR	3_prime_UTR_variant	1	1	101198287	621	downstream	UTR	-0.859738	<0.001	0.00181	0.363	|	0.210059	0.0734	0.0635	0.621	|	0	35	0	0	47	0	0	35	0	0	29	0	0	37	0	0	37	0	1	28	0.0357143	0	26	0	0
chr11	101198930	-	T	chr11:101198930	Ezh1	SINE	UTR	3_prime_UTR_variant	0	0	-	-	-	-	0.726986	0.0287	0.0173	0.578	|	0.709451	0.0115	0.00706	0.692	|	1	22	0.0454545	1	48	0.0208333	4	26	0.153846	1	26	0.0384615	0	29	0	2	27	0.0740741	1	33	0.030303	2	17	0.117647	0
chr11	101198976	-	T	chr11:101198976	Ezh1	SINE	UTR	3_prime_UTR_variant	1	1	-	-	-	-	1.96856	0.149	0.038	0.284	|	0.26252	0.76	0.633	0.00635	|	3	15	0.2	9	43	0.209302	5	20	0.25	4	20	0.2	5	27	0.185185	3	28	0.107143	12	37	0.324324	3	20	0.15	0
chr11	101296769	-	T	chr11:101296769	Becn1,Cntd1	SINE	Intron	non_coding_transcript_variant	1	1	101296452	317	downstream	intronic	0	<0.001	<0.001	---	|	3.13222	0.566	0.0646	0.109	|	0	8	0	0	57	0	0	10	0	0	24	0	0	13	0	0	35	0	0	0	---	0	18	0	0
chr11	101296770	-	T	chr11:101296770	Becn1,Cntd1	SINE	Intron	non_coding_transcript_variant	0	0	101296452	318	downstream	intronic	0	<0.001	<0.001	---	|	5.08758	0.193	0.00567	0.0265	|	0	8	0	0	57	0	0	10	0	0	24	0	0	14	0	0	36	0	0	0	---	0	18	0	0
chr11	101296772	-	T	chr11:101296772	Becn1,Cntd1	SINE	Intron	non_coding_transcript_variant	1	1	101296450	322	downstream	intronic	1.13264	0.00219	<0.001	0.363	|	2.68852	0.76	0.118	0.188	|	0	8	0	0	57	0	0	10	0	0	25	0	0	14	0	0	36	0	0	0	---	2	18	0.111111	0
chr11	101403842	-	T	chr11:101403842	Aarsd1,Gm27029	SINE	intergenic	downstream_gene_variant	0	0	-	-	-	-	0	<0.001	<0.001	---	|	1.4037	0.271	0.102	0.294	|	0	1	0	0	0	---	0	0	---	0	0	---	0	0	---	0	0	---	0	0	---	0	0	---	0
chr11	101403866	-	T	chr11:101403866	Aarsd1,Gm27029	SINE	intergenic	downstream_gene_variant	0	0	101405866	2000	upstream	undefined	0	<0.001	<0.001	---	|	2.56193	0.172	0.029	0.0363	|	0	0	---	0	0	---	0	0	---	0	0	---	0	0	---	0	0	---	0	0	---	0	0	---	0
chr11	101403871	-	T	chr11:101403871	Aarsd1,Gm27029	SINE	intergenic	downstream_gene_variant	0	0	101405859	1988	upstream	undefined	0	<0.001	<0.001	---	|	-2.79418	0.0393	0.272	0.0963	|	0	0	---	0	0	---	0	0	---	0	0	---	0	0	---	0	0	---	0	0	---	0	0	---	0
chr11	101461050	-	T	chr11:101461050	Gm11626,Ifi35,Rnd2,Vat1	SINE	Intron	intron_variant	0	0	-	-	-	-	0	<0.001	<0.001	---	|	2.28661	0.294	0.0602	0.279	|	0	1	0	0	6	0	0	4	0	0	6	0	0	1	0	0	6	0	0	5	0	0	4	0	0
chr11	101461052	-	T	chr11:101461052	Gm11626,Ifi35,Rnd2,Vat1	SINE	Intron	intron_variant	0	0	101458639	2413	downstream	UTR	0	<0.001	<0.001	---	|	0.537932	0.352	0.242	0.536	|	0	1	0	0	6	0	0	4	0	0	6	0	0	1	0	0	6	0	0	5	0	0	4	0	0
chr11	101578871	+	A	chr11:101578871	Nbr1,Tmem106a	SINE	Intron	non_coding_transcript_variant	1	1	101579256	385	downstream	intronic	0.86866	0.178	0.0977	0.228	|	0.551359	0.916	0.625	0.0514	|	2	27	0.0740741	29	48	0.604167	3	39	0.0769231	14	30	0.466667	7	23	0.304348	27	67	0.402985	4	8	0.5	11	25	0.44	1
chr11	101578877	+	A	chr11:101578877	Nbr1,Tmem106a	SINE	Intron	non_coding_transcript_variant	0	0	101579247	370	downstream	intronic	2.77758	0.0157	0.00229	0.276	|	5.10781	0.0345	<0.001	0.000251	|	0	30	0	1	49	0.0204082	0	42	0	2	31	0.0645161	0	24	0	3	76	0.0394737	2	14	0.142857	0	25	0	0
chr11	101578885	+	A	chr11:101578885	Nbr1,Tmem106a	SINE	Intron	non_coding_transcript_variant	1	1	101579240	355	downstream	intronic	-1.04422	<0.001	0.00206	0.363	|	6.95522	0.124	<0.001	3.73e-05	|	0	28	0	0	46	0	0	41	0	0	33	0	2	26	0.0769231	0	76	0	0	19	0	0	25	0	0
chr11	101767048	+	A	chr11:101767048	Dhx8,Etv4	SINE	UTR	3_prime_UTR_variant	0	0	101765879	1169	upstream	intronic	-0.132022	0.00261	0.00286	0.933	|	0.864677	0.0297	0.0163	0.0727	|	3	157	0.0191083	0	158	0	1	162	0.00617284	0	111	0	0	178	0	1	112	0.00892857	0	271	0	0	270	0	0
chr11	101768322	+	A	chr11:101768322	Dhx8,Etv4	SINE	intergenic	downstream_gene_variant	1	1	-	-	-	-	-2.94819	<0.001	0.00772	0.0768	|	1.42356	0.0117	0.00437	0.552	|	0	31	0	0	12	0	0	41	0	0	9	0	2	28	0.0714286	0	14	0	2	26	0.0769231	0	10	0	0
chr11	101768327	+	A	chr11:101768327	Dhx8,Etv4	SINE	intergenic	downstream_gene_variant	1	1	-	-	-	-	-4.96881	0.00231	0.0725	0.0196	|	0.263625	0.157	0.131	0.397	|	8	27	0.296296	2	13	0.153846	3	35	0.0857143	0	8	0	2	29	0.0689655	0	13	0	7	26	0.269231	0	10	0	0
chr11	101768335	+	A	chr11:101768335	Dhx8,Etv4	SINE	intergenic	downstream_gene_variant	1	1	-	-	-	-	-5.52743	<0.001	0.0461	0.00565	|	2.70871	0.0835	0.0128	0.175	|	2	27	0.0740741	0	13	0	4	31	0.129032	0	7	0	2	28	0.0714286	0	13	0	11	30	0.366667	0	11	0	0
chr11	101768339	+	A	chr11:101768339	Dhx8,Etv4	SINE	intergenic	downstream_gene_variant	1	1	-	-	-	-	-4.09832	<0.001	0.0171	0.0259	|	-0.308114	0.0414	0.0513	0.857	|	1	24	0.0416667	0	12	0	3	30	0.1	0	7	0	2	30	0.0666667	0	14	0	3	33	0.0909091	0	11	0	0
chr11	101972529	-	T	chr11:101972529	Dusp3,Gm20659	SINE	UTR	3_prime_UTR_variant	0	0	-	-	-	-	-2.85508	0.0121	0.0877	0.103	|	-0.53324	0.0477	0.0691	0.181	|	1	45	0.0222222	0	4	0	8	45	0.177778	1	6	0.166667	8	78	0.102564	0	16	0	8	61	0.131148	8	35	0.228571	3
chr11	101972535	-	T	chr11:101972535	Dusp3,Gm20659	SINE	UTR	3_prime_UTR_variant	0	0	-	-	-	-	2.11861	0.00848	0.00195	0.195	|	-1.67537	0.00555	0.0177	0.18	|	0	48	0	0	5	0	0	44	0	0	6	0	0	80	0	1	20	0.05	0	70	0	6	35	0.171429	2
chr11	101972551	-	T	chr11:101972551	Dusp3,Gm20659	SINE	UTR	3_prime_UTR_variant	0	0	-	-	-	-	0	<0.001	<0.001	---	|	0.458169	0.00347	0.00253	0.785	|	0	51	0	0	6	0	0	45	0	0	5	0	0	76	0	0	22	0	0	82	0	0	42	0	0
chr11	101972669	-	T	chr11:101972669	Dusp3,Gm20659	SINE	UTR	3_prime_UTR_variant	0	0	-	-	-	-	-4.35089	<0.001	0.0204	0.00553	|	0.830568	0.0374	0.021	0.106	|	3	94	0.0319149	0	14	0	2	90	0.0222222	0	12	0	3	153	0.0196078	0	21	0	4	67	0.0597015	0	30	0	0
chr11	101972685	-	T	chr11:101972685	Dusp3,Gm20659	SINE	UTR	3_prime_UTR_variant	0	0	-	-	-	-	-2.56188	0.00204	0.012	0.0914	|	0.618355	0.0204	0.0133	0.114	|	1	116	0.00862069	0	11	0	2	93	0.0215054	1	14	0.0714286	1	162	0.00617284	0	28	0	0	63	0	0	28	0	2
chr11	102163660	-	T	chr11:102163660	Lsm12	.	UTR	3_prime_UTR_variant	0	0	-	-	-	-	-1.40681	0.00436	0.0116	0.0852	|	0.58058	0.00192	0.00128	0.527	|	6	198	0.030303	2	110	0.0181818	3	168	0.0178571	2	135	0.0148148	2	264	0.00757576	0	192	0	3	199	0.0150754	0	138	0	0
chr11	102163661	-	T	chr11:102163661	Lsm12	.	UTR	3_prime_UTR_variant	0	0	-	-	-	-	-0.209854	0.0118	0.0136	0.909	|	-0.362193	<0.001	0.00129	0.374	|	7	199	0.0351759	0	110	0	3	169	0.0177515	3	135	0.0222222	7	257	0.0272374	0	190	0	8	200	0.04	8	140	0.0571429	0
chr11	102163662	-	T	chr11:102163662	Lsm12	.	UTR	3_prime_UTR_variant	0	0	-	-	-	-	-1.38052	0.0414	0.108	0.0608	|	0.964351	0.0103	0.00526	0.409	|	27	196	0.137755	3	110	0.0272727	20	168	0.119048	6	135	0.0444444	30	260	0.115385	2	189	0.010582	28	199	0.140704	9	140	0.0642857	5
chr11	102287648	+	A	chr11:102287648	Atxn7l3,Tmub2	.	Exon	missense_variant	0	0	-	-	-	-	-1.03918	0.00356	0.00732	0.564	|	-0.0929072	0.00728	0.00776	0.852	|	2	244	0.00819672	0	114	0	5	199	0.0251256	0	51	0	2	218	0.00917431	3	103	0.0291262	2	236	0.00847458	0	83	0	0
chr11	104312957	+	A	chr11:104312957	Mapt	SINE	Intron	intron_variant	1	1	104314167	1210	downstream	intronic	0	<0.001	<0.001	---	|	0.0842928	0.0236	0.0222	0.974	|	0	0	---	---	---	---	0	0	---	0	0	---	0	0	---	---	---	---	0	0	---	0	2	0	0
chr11	104312958	+	A	chr11:104312958	Mapt	SINE	Intron	intron_variant	0	0	-	-	-	-	0	<0.001	<0.001	---	|	2.47387	0.00556	<0.001	0.185	|	0	0	---	---	---	---	0	0	---	0	0	---	0	0	---	---	---	---	0	0	---	0	2	0	0
chr11	104326238	+	A	chr11:104326238	Mapt	LTR	Intron	non_coding_transcript_variant	0	0	104325230	1008	upstream	intronic	0	<0.001	<0.001	---	|	5.09164	0.109	0.0032	0.0246	|	0	0	---	---	---	---	0	0	---	0	0	---	0	0	---	---	---	---	0	0	---	0	3	0	0
chr11	104326281	+	A	chr11:104326281	Mapt	LTR	Intron	non_coding_transcript_variant	0	0	104325188	1093	upstream	intronic	0	<0.001	<0.001	---	|	3.61534	0.0392	0.0032	0.125	|	0	0	---	---	---	---	0	0	---	0	0	---	0	0	---	---	---	---	0	0	---	0	3	0	0
chr11	104326985	+	A	chr11:104326985	Mapt	LTR	Intron	non_coding_transcript_variant	0	0	104324727	2258	upstream	intronic	-2.34521	<0.001	0.00508	0.391	|	2.89084	0.129	0.0174	0.167	|	0	0	---	---	---	---	0	0	---	0	0	---	0	0	---	---	---	---	0	0	---	0	0	---	6
chr11	104327758	+	A	chr11:104327758	Mapt	SINE	Intron	non_coding_transcript_variant	0	0	104326768	990	upstream	intronic	0	<0.001	<0.001	---	|	6.48305	0.196	0.00219	0.00442	|	0	0	---	---	---	---	0	1	0	0	0	---	0	0	---	---	---	---	0	0	---	0	0	---	0
chr11	105179146	-	T	chr11:105179146	1700052K11Rik,Tlk2	.	UTR	5_prime_UTR_variant	0	0	-	-	-	-	0.0283208	0.00607	0.00595	0.992	|	-2.89464	0.017	0.126	0.22	|	0	4	0	2	8	0.25	0	5	0	1	5	0.2	2	15	0.133333	0	3	0	3	9	0.333333	0	4	0	0
chr11	105181940	+	A	chr11:105181940	1700052K11Rik,Tlk2	.	UTR	regulatory_region_variant	0	0	-	-	-	-	0.762244	0.0017	<0.001	0.363	|	-1.97083	0.00453	0.0178	0.567	|	0	33	0	1	42	0.0238095	0	43	0	0	26	0	0	55	0	0	44	0	0	26	0	0	21	0	0
chr11	105276808	+	A	chr11:105276808	Tlk2	SINE	UTR	3_prime_UTR_variant	0	0	-	-	-	-	2.47402	0.00556	<0.001	0.18	|	1.08032	0.394	0.186	0.608	|	0	7	0	6	17	0.352941	0	8	0	0	9	0	0	5	0	2	24	0.0833333	0	9	0	0	12	0	0
chr11	105276809	+	A	chr11:105276809	Tlk2	SINE	UTR	3_prime_UTR_variant	0	0	-	-	-	-	0.97972	0.00197	<0.001	0.363	|	2.02356	0.0102	0.00251	0.233	|	0	7	0	1	17	0.0588235	0	8	0	0	9	0	0	6	0	0	24	0	0	9	0	0	12	0	0
chr11	105276810	+	A	chr11:105276810	Tlk2	SINE	UTR	3_prime_UTR_variant	0	0	-	-	-	-	0.97972	0.00197	<0.001	0.363	|	2.2816	0.00486	<0.001	0.183	|	0	7	0	1	17	0.0588235	0	8	0	0	9	0	0	6	0	0	24	0	0	9	0	0	11	0	0
chr11	105276828	+	A	chr11:105276828	Tlk2	SINE	UTR	3_prime_UTR_variant	0	0	105277656	828	downstream	intronic	1.0264	0.00204	<0.001	0.363	|	0.796604	0.0717	0.0413	0.721	|	0	6	0	1	14	0.0714286	0	8	0	0	8	0	0	6	0	0	16	0	0	5	0	0	11	0	0
chr11	105928080	+	A	chr11:105928080	Tanc2	.	UTR	3_prime_UTR_variant	0	0	-	-	-	-	0.474666	0.00271	0.00195	0.812	|	0.671805	0.22	0.138	0.00346	|	0	4	0	0	7	0	0	5	0	0	2	0	1	18	0.0555556	0	1	0	0	14	0	2	5	0.4	0
chr11	106035308	+	A	chr11:106035308	Dcaf7,Kcnh6	SINE	intergenic	downstream_gene_variant	0	0	-	-	-	-	0	<0.001	<0.001	---	|	0.0592644	0.0361	0.0347	0.977	|	0	0	---	0	0	---	---	---	---	---	---	---	0	0	---	---	---	---	---	---	---	---	---	---	0
chr11	106035309	+	A	chr11:106035309	Dcaf7,Kcnh6	SINE	intergenic	downstream_gene_variant	0	0	-	-	-	-	0	<0.001	<0.001	---	|	2.52636	0.0869	0.0151	0.119	|	0	0	---	0	0	---	---	---	---	---	---	---	0	0	---	---	---	---	---	---	---	---	---	---	0
chr11	106035371	+	A	chr11:106035371	Dcaf7,Kcnh6	SINE	intergenic	downstream_gene_variant	0	0	-	-	-	-	0	<0.001	<0.001	---	|	3.36984	0.0494	0.00478	0.239	|	0	0	---	0	0	---	---	---	---	---	---	---	0	0	---	---	---	---	---	---	---	---	---	---	0
chr11	106156971	+	A	chr11:106156971	Gm10840,Limd2,Map3k3	SINE	UTR	3_prime_UTR_variant	0	0	-	-	-	-	0.622828	0.00154	<0.001	0.363	|	0	<0.001	<0.001	---	|	0	177	0	1	75	0.0133333	0	109	0	0	46	0	0	172	0	0	63	0	0	164	0	0	66	0	0
chr11	106156985	+	A	chr11:106156985	Gm10840,Limd2,Map3k3	SINE	UTR	3_prime_UTR_variant	0	0	-	-	-	-	-0.532933	<0.001	0.00145	0.363	|	0	<0.001	<0.001	---	|	0	191	0	0	73	0	1	109	0.00917431	0	42	0	0	172	0	0	64	0	0	160	0	0	54	0	0
chr11	106157045	+	A	chr11:106157045	Gm10840,Limd2,Map3k3	SINE	UTR	3_prime_UTR_variant	0	0	106157760	715	downstream	UTR	-0.526405	<0.001	0.00144	0.363	|	0	<0.001	<0.001	---	|	0	164	0	0	60	0	1	112	0.00892857	0	44	0	0	149	0	0	62	0	0	125	0	0	43	0	0
chr11	106157065	-	T	chr11:106157065	Gm10840,Limd2,Map3k3	SINE	UTR	3_prime_UTR_variant	0	0	106157739	674	upstream	UTR	-2.87404	0.00341	0.025	0.0908	|	0	<0.001	<0.001	---	|	5	149	0.033557	2	55	0.0363636	4	107	0.0373832	2	46	0.0434783	3	137	0.0218978	0	57	0	14	119	0.117647	0	33	0	6
chr11	106157073	-	T	chr11:106157073	Gm10840,Limd2,Map3k3	SINE	UTR	3_prime_UTR_variant	0	0	-	-	-	-	-3.02584	0.00227	0.0185	0.199	|	-0.142099	0.00242	0.00267	0.95	|	4	157	0.0254777	0	59	0	2	113	0.0176991	0	47	0	9	154	0.0584416	0	57	0	7	116	0.0603448	0	34	0	2
chr11	106157074	-	T	chr11:106157074	Gm10840,Limd2,Map3k3	SINE	UTR	3_prime_UTR_variant	0	0	-	-	-	-	-2.99615	0.0107	0.0852	0.117	|	3.54914	0.0631	0.00539	0.257	|	12	163	0.0736196	7	59	0.118644	6	111	0.0540541	5	47	0.106383	17	155	0.109677	0	58	0	16	117	0.136752	4	34	0.117647	12
chr11	106157751	+	A	chr11:106157751	Gm10840,Limd2,Map3k3	SINE	UTR	3_prime_UTR_variant	0	0	106157057	694	upstream	UTR	0	<0.001	<0.001	---	|	-1.08844	<0.001	0.00213	0.374	|	0	261	0	0	91	0	0	227	0	0	71	0	0	294	0	0	91	0	0	449	0	0	146	0	0
chr11	106157778	-	T	chr11:106157778	Gm10840,Limd2,Map3k3	SINE	UTR	3_prime_UTR_variant	0	0	-	-	-	-	-1.23928	0.00469	0.0111	0.196	|	0.718028	0.0241	0.0147	0.759	|	4	420	0.00952381	4	127	0.0314961	10	396	0.0252525	1	83	0.0120482	10	478	0.0209205	4	143	0.027972	3	560	0.00535714	0	196	0	3
chr11	109232075	-	T	chr11:109232075	Rgs9	SINE	Intron	intron_variant	0	0	109232446	371	upstream	intronic	0	<0.001	<0.001	---	|	-0.0183604	0.0585	0.0592	0.969	|	0	2	0	0	0	---	0	1	0	0	2	0	0	0	---	0	0	---	0	0	---	0	0	---	0
chr11	109234358	-	T	chr11:109234358	Rgs9	SINE	Intron	intron_variant	1	1	-	-	-	-	0	<0.001	<0.001	---	|	1.10855	0.293	0.136	0.148	|	0	1	0	0	0	---	0	0	---	0	0	---	0	1	0	0	0	---	0	0	---	0	0	---	0
chr11	109234367	-	T	chr11:109234367	Rgs9	SINE	Intron	intron_variant	1	1	-	-	-	-	0	<0.001	<0.001	---	|	0.130283	0.0187	0.0171	0.966	|	0	1	0	0	0	---	0	0	---	0	0	---	0	1	0	0	2	0	0	0	---	0	0	---	0
chr11	109234371	-	T	chr11:109234371	Rgs9	SINE	Intron	intron_variant	0	0	-	-	-	-	0	<0.001	<0.001	---	|	3.08348	0.0827	0.00975	0.0559	|	0	0	---	0	0	---	0	0	---	0	0	---	0	2	0	0	2	0	0	0	---	0	0	---	0
chr11	109469027	-	T	chr11:109469027	Arsg,Gm25540,Slc16a6	SINE	Intron	non_coding_transcript_variant	0	0	-	-	-	-	0	<0.001	<0.001	---	|	-5.2536	0.00731	0.279	0.0572	|	0	62	0	0	71	0	0	40	0	0	36	0	0	47	0	0	27	0	0	0	---	0	0	---	0
chr11	109469028	-	T	chr11:109469028	Arsg,Gm25540,Slc16a6	SINE	Intron	non_coding_transcript_variant	0	0	-	-	-	-	0	<0.001	<0.001	---	|	-5.33661	0.00792	0.32	0.0502	|	0	63	0	0	70	0	0	39	0	0	36	0	0	49	0	0	27	0	0	0	---	0	0	---	0
chr11	114901818	+	A	chr11:114901818	Cd300a	SINE	UTR	3_prime_UTR_variant	1	1	114902769	951	downstream	UTR	-1.17684	<0.001	0.00226	0.175	|	-0.943571	<0.001	0.00192	0.374	|	5	460	0.0108696	0	37	0	0	279	0	0	30	0	5	407	0.012285	0	45	0	0	694	0	0	122	0	0
chr11	114901823	+	A	chr11:114901823	Cd300a	SINE	UTR	3_prime_UTR_variant	1	1	114902764	941	downstream	UTR	-0.485803	0.0016	0.00224	0.677	|	-0.959172	<0.001	0.00194	0.374	|	3	450	0.00666667	0	37	0	0	259	0	0	29	0	5	395	0.0126582	0	45	0	1	677	0.0014771	0	114	0	0
chr11	114901834	+	A	chr11:114901834	Cd300a	SINE	UTR	3_prime_UTR_variant	1	1	-	-	-	-	-1.51961	<0.001	0.00287	0.105	|	-3.64365	<0.001	0.0125	0.075	|	5	422	0.0118483	0	33	0	0	231	0	0	25	0	7	371	0.0188679	0	40	0	1	622	0.00160772	0	104	0	1
chr11	114901843	+	A	chr11:114901843	Cd300a	SINE	UTR	3_prime_UTR_variant	0	0	114902744	901	downstream	UTR	-0.747759	0.00319	0.00535	0.673	|	-4.47957	0.00256	0.057	0.0423	|	7	375	0.0186667	0	28	0	6	210	0.0285714	0	22	0	4	337	0.0118694	0	39	0	2	540	0.0037037	7	97	0.0721649	0
chr11	115118890	-	T	chr11:115118890	Cd300lf,Rab37	SINE	Intron	regulatory_region_variant	0	0	-	-	-	-	3.53636	0.0116	<0.001	0.0284	|	0	<0.001	<0.001	---	|	0	135	0	16	225	0.0711111	0	76	0	3	106	0.0283019	0	105	0	3	165	0.0181818	0	37	0	3	45	0.0666667	0
chr11	115118909	-	T	chr11:115118909	Cd300lf,Rab37	SINE	Intron	regulatory_region_variant	0	0	-	-	-	-	4.57077	0.0406	0.00171	0.0112	|	-1.99316	<0.001	0.00398	0.374	|	0	127	0	21	208	0.100962	2	81	0.0246914	10	100	0.1	0	94	0	13	166	0.0783133	0	40	0	5	45	0.111111	0
chr11	115118944	-	T	chr11:115118944	Cd300lf,Rab37	SINE	Intron	regulatory_region_variant	0	0	-	-	-	-	3.40479	0.0106	<0.001	0.0311	|	0	<0.001	<0.001	---	|	0	108	0	2	150	0.0133333	0	64	0	2	92	0.0217391	0	68	0	7	125	0.056	0	54	0	4	46	0.0869565	0
chr11	115119393	+	A	chr11:115119393	Cd300lf,Rab37	SINE	Intron	regulatory_region_variant	0	0	115118975	418	upstream	intronic	-0.292362	0.00126	0.00154	0.363	|	0	<0.001	<0.001	---	|	2	150	0.0133333	1	253	0.00395257	0	122	0	0	174	0	0	147	0	0	215	0	0	23	0	0	39	0	0
chr11	115119412	-	T	chr11:115119412	Cd300lf,Rab37	SINE	Intron	regulatory_region_variant	0	0	-	-	-	-	4.67413	0.0371	0.00145	0.0094	|	1.99316	0.00398	<0.001	0.374	|	0	163	0	28	245	0.114286	1	107	0.00934579	12	151	0.0794702	0	150	0	13	214	0.0607477	0	26	0	1	41	0.0243902	0
chr11	115119413	-	T	chr11:115119413	Cd300lf,Rab37	SINE	Intron	regulatory_region_variant	0	0	-	-	-	-	5.08994	0.0467	0.00137	0.00862	|	1.99316	0.00398	<0.001	0.374	|	0	164	0	44	256	0.171875	0	108	0	15	153	0.0980392	1	150	0.00666667	21	218	0.0963303	0	27	0	1	42	0.0238095	0
chr11	115119416	-	T	chr11:115119416	Cd300lf,Rab37	SINE	Intron	regulatory_region_variant	0	0	-	-	-	-	2.79029	0.00692	<0.001	0.039	|	0	<0.001	<0.001	---	|	0	173	0	14	262	0.0534351	0	101	0	3	159	0.0188679	0	155	0	1	230	0.00434783	0	27	0	1	40	0.025	0
chr11	115395412	+	A	chr11:115395412	Cdr2l	SINE	UTR	3_prime_UTR_variant	0	0	-	-	-	-	0	<0.001	<0.001	---	|	1.70989	0.0187	0.00572	0.172	|	0	0	---	0	0	---	0	2	0	0	0	---	0	0	---	0	0	---	0	4	0	0	7	0	0
chr11	115404727	+	A	chr11:115404727	Ict1os,Mrpl58	SINE	Intron	regulatory_region_variant	0	0	-	-	-	-	0	<0.001	<0.001	---	|	4.8059	0.0689	0.00246	0.0165	|	0	10	0	0	8	0	0	0	---	0	2	0	0	5	0	0	7	0	0	0	---	0	8	0	0
chr11	115407578	+	A	chr11:115407578	Ict1os,Mrpl58	SINE	Intron	regulatory_region_variant	0	0	-	-	-	-	0	<0.001	<0.001	---	|	4.3132	0.0983	0.00495	0.0513	|	0	5	0	0	4	0	0	5	0	0	8	0	0	6	0	0	18	0	0	7	0	0	4	0	0
chr11	115407643	+	A	chr11:115407643	Ict1os,Mrpl58	SINE	Intron	regulatory_region_variant	0	0	-	-	-	-	0	<0.001	<0.001	---	|	4.46847	0.159	0.00718	0.0807	|	0	6	0	0	5	0	0	4	0	0	12	0	0	11	0	0	18	0	0	5	0	0	8	0	0
chr11	115407644	+	A	chr11:115407644	Ict1os,Mrpl58	SINE	Intron	regulatory_region_variant	1	1	-	-	-	-	0	<0.001	<0.001	---	|	4.35267	0.166	0.00814	0.0996	|	0	6	0	0	5	0	0	4	0	0	12	0	0	11	0	0	18	0	0	5	0	0	8	0	0
chr11	115407649	+	A	chr11:115407649	Ict1os,Mrpl58	SINE	Intron	regulatory_region_variant	0	0	-	-	-	-	2.04319	0.00412	<0.001	0.175	|	2.78866	0.25	0.0361	0.108	|	0	5	0	0	5	0	0	4	0	1	12	0.0833333	0	11	0	1	17	0.0588235	0	6	0	0	8	0	0
chr11	115407650	+	A	chr11:115407650	Ict1os,Mrpl58	SINE	Intron	regulatory_region_variant	0	0	-	-	-	-	0	<0.001	<0.001	---	|	4.59871	0.0613	0.00253	0.016	|	0	5	0	0	5	0	0	4	0	0	12	0	0	11	0	0	17	0	0	6	0	0	8	0	0
chr11	115407803	+	A	chr11:115407803	Ict1os,Mrpl58	SINE	Intron	regulatory_region_variant	1	1	-	-	-	-	0	<0.001	<0.001	---	|	2.12624	0.0525	0.012	0.428	|	0	3	0	0	4	0	0	1	0	0	11	0	0	2	0	0	8	0	0	8	0	0	0	---	0
chr11	115408624	+	A	chr11:115408624	Ict1os,Mrpl58	SINE	Intron	regulatory_region_variant	1	1	115406790	1834	upstream	exonic	0	<0.001	<0.001	---	|	3.9806	0.0158	<0.001	0.0714	|	0	2	0	0	6	0	0	5	0	0	2	0	0	4	0	0	4	0	0	4	0	0	3	0	0
chr11	115408642	+	A	chr11:115408642	Ict1os,Mrpl58	SINE	Intron	regulatory_region_variant	1	1	115406774	1868	upstream	exonic	0.97972	0.00197	<0.001	0.363	|	5.85567	0.132	0.00229	0.00904	|	0	3	0	0	8	0	0	6	0	0	3	0	0	8	0	0	4	0	0	4	0	0	4	0	0
chr11	115408643	+	A	chr11:115408643	Ict1os,Mrpl58	SINE	Intron	regulatory_region_variant	0	0	115406773	1870	upstream	exonic	0	<0.001	<0.001	---	|	1.44747	0.00616	0.00226	0.232	|	0	3	0	0	8	0	0	6	0	0	3	0	0	8	0	0	4	0	0	2	0	0	4	0	0
chr11	115484060	+	A	chr11:115484060	Armc7	SINE	Intron	regulatory_region_variant	0	0	-	-	-	-	3.36906	0.0103	<0.001	0.0346	|	0	<0.001	<0.001	---	|	0	30	0	1	64	0.015625	0	13	0	0	55	0	0	26	0	1	52	0.0192308	0	42	0	0	23	0	0
chr11	115484086	+	A	chr11:115484086	Armc7	LTR	Intron	regulatory_region_variant	0	0	115482849	1237	upstream	intronic	3.92949	0.0152	<0.001	0.0355	|	3.41142	0.0106	<0.001	0.179	|	0	27	0	1	73	0.0136986	0	12	0	3	55	0.0545455	0	21	0	0	66	0	0	30	0	0	17	0	0
chr11	115484089	+	A	chr11:115484089	Armc7	LTR	Intron	regulatory_region_variant	0	0	115482846	1243	upstream	intronic	3.84758	0.0144	<0.001	0.0373	|	0	<0.001	<0.001	---	|	0	27	0	1	71	0.0140845	0	13	0	4	53	0.0754717	0	18	0	0	65	0	0	30	0	0	17	0	0
chr11	115491511	-	T	chr11:115491511	Armc7,Gm11694,Nt5c	.	Intron	regulatory_region_variant	0	0	115491422	89	downstream	intronic	6.37123	0.21	0.00253	0.00903	|	4.96364	0.214	0.00685	0.0366	|	0	24	0	3	25	0.12	0	25	0	12	22	0.545455	0	25	0	4	21	0.190476	0	74	0	5	35	0.142857	5
chr11	115498777	-	T	chr11:115498777	Jpt1	SINE	Intron	non_coding_transcript_variant	0	0	115496848	1929	downstream	undefined	-1.26224	<0.001	0.0024	0.363	|	3.20169	0.0501	0.00545	0.0517	|	0	53	0	0	65	0	0	41	0	0	58	0	0	52	0	0	85	0	0	62	0	0	80	0	0
chr11	115498781	-	T	chr11:115498781	Jpt1	SINE	Intron	non_coding_transcript_variant	0	0	115496843	1938	downstream	undefined	-0.928286	0.0195	0.0371	0.733	|	2.3286	0.5	0.0996	0.00222	|	0	54	0	4	64	0.0625	1	40	0.025	5	58	0.0862069	2	51	0.0392157	5	83	0.060241	1	63	0.015873	13	77	0.168831	6
chr11	115499317	-	T	chr11:115499317	Jpt1	SINE	Intron	non_coding_transcript_variant	0	0	-	-	-	-	3.5555	0.0118	<0.001	0.0317	|	1.20077	0.172	0.0747	0.112	|	0	48	0	1	55	0.0181818	0	35	0	6	63	0.0952381	0	51	0	1	57	0.0175439	0	60	0	4	46	0.0869565	0
chr11	115500040	-	T	chr11:115500040	Jpt1	.	Intron	non_coding_transcript_variant	0	0	-	-	-	-	-1.23014	<0.001	0.00235	0.363	|	2.73538	0.0379	0.0057	0.0959	|	0	23	0	0	49	0	0	23	0	0	58	0	0	35	0	0	29	0	0	55	0	0	48	0	0
chr11	115500094	-	T	chr11:115500094	Jpt1	SINE	Intron	non_coding_transcript_variant	0	0	-	-	-	-	1.55597	0.00639	0.00217	0.468	|	2.7093	0.119	0.0182	0.0939	|	0	22	0	5	68	0.0735294	0	33	0	3	69	0.0434783	0	32	0	1	47	0.0212766	0	45	0	0	50	0	0
chr11	115500100	-	T	chr11:115500100	Jpt1	SINE	Intron	non_coding_transcript_variant	1	1	-	-	-	-	2.34703	0.0194	0.00382	0.29	|	0.920376	0.274	0.145	0.131	|	0	23	0	5	70	0.0714286	0	33	0	1	69	0.0144928	1	34	0.0294118	2	48	0.0416667	0	50	0	2	51	0.0392157	0
chr11	115500141	-	T	chr11:115500141	Jpt1	SINE	Intron	non_coding_transcript_variant	0	0	-	-	-	-	2.53023	0.00578	<0.001	0.078	|	2.5947	0.0737	0.0122	0.0974	|	0	18	0	3	58	0.0517241	0	25	0	2	58	0.0344828	0	29	0	1	48	0.0208333	0	22	0	0	26	0	0
chr11	115500154	-	T	chr11:115500154	Jpt1	SINE	Intron	non_coding_transcript_variant	1	1	-	-	-	-	3.61558	0.0123	<0.001	0.0257	|	0.655324	0.189	0.12	0.243	|	0	15	0	2	59	0.0338983	0	21	0	2	44	0.0454545	0	20	0	3	47	0.0638298	0	17	0	0	22	0	0
chr11	115500171	-	T	chr11:115500171	Jpt1	SINE	Intron	non_coding_transcript_variant	0	0	-	-	-	-	0.697404	0.00851	0.00525	0.761	|	2.40547	0.141	0.0266	0.0973	|	0	16	0	3	44	0.0681818	1	16	0.0625	3	36	0.0833333	0	18	0	3	45	0.0666667	0	13	0	0	6	0	0
chr11	115500173	-	T	chr11:115500173	Jpt1	SINE	Intron	non_coding_transcript_variant	0	0	-	-	-	-	2.29254	0.00976	0.00199	0.161	|	2.36801	0.261	0.0506	0.13	|	0	16	0	7	45	0.155556	1	16	0.0625	3	36	0.0833333	0	18	0	3	45	0.0666667	0	13	0	0	6	0	0
chr11	115500350	-	T	chr11:115500350	Jpt1	SINE	Intron	non_coding_transcript_variant	0	0	115502323	1973	upstream	intronic	0	<0.001	<0.001	---	|	3.03175	0.0582	0.00712	0.361	|	0	8	0	0	12	0	0	12	0	0	9	0	0	6	0	0	12	0	0	12	0	0	13	0	0
chr11	115500351	-	T	chr11:115500351	Jpt1	SINE	Intron	non_coding_transcript_variant	0	0	115502314	1963	upstream	intronic	1.04422	0.00206	<0.001	0.363	|	2.93176	0.167	0.0219	0.168	|	0	8	0	0	12	0	0	12	0	0	9	0	0	6	0	0	12	0	0	12	0	1	13	0.0769231	0
chr11	115500489	-	T	chr11:115500489	Jpt1	SINE	Intron	non_coding_transcript_exon_variant	0	0	-	-	-	-	2.12862	0.00437	<0.001	0.18	|	2.89189	0.232	0.0313	0.0871	|	0	19	0	0	48	0	0	26	0	2	44	0.0454545	0	26	0	0	57	0	0	26	0	0	20	0	0
chr11	115529737	-	T	chr11:115529737	Sumo2	SINE	Intron	regulatory_region_variant	0	0	115528091	1646	downstream	intronic	1.29057	0.00245	<0.001	0.363	|	1.32877	0.00251	<0.001	0.374	|	0	7	0	0	6	0	0	4	0	0	6	0	0	11	0	3	14	0.214286	0	4	0	0	0	---	0
chr11	115529740	-	T	chr11:115529740	Sumo2	SINE	Intron	regulatory_region_variant	0	0	115528084	1656	downstream	intronic	0	<0.001	<0.001	---	|	1.30127	0.00246	<0.001	0.374	|	0	7	0	0	6	0	0	4	0	0	6	0	0	11	0	0	15	0	0	4	0	0	0	---	0
chr11	115622392	-	T	chr11:115622392	Gm26613,Slc25a19	SINE	Intron	non_coding_transcript_variant	0	0	-	-	-	-	0	<0.001	<0.001	---	|	4.10657	0.081	0.0047	0.0431	|	0	9	0	0	1	0	0	5	0	0	3	0	0	13	0	0	2	0	0	33	0	0	14	0	0
chr11	115966483	+	A	chr11:115966483	Sap30bp	SINE	UTR	3_prime_UTR_variant	0	0	-	-	-	-	-0.303521	<0.001	0.00123	0.363	|	-0.086279	0.0197	0.0209	0.95	|	0	81	0	0	31	0	0	73	0	0	26	0	0	85	0	0	68	0	0	233	0	0	156	0	1
chr11	115966606	+	A	chr11:115966606	Sap30bp	SINE	UTR	3_prime_UTR_variant	1	1	115968525	1919	downstream	undefined	0	<0.001	<0.001	---	|	2.83324	0.00713	<0.001	0.0707	|	0	45	0	0	16	0	0	35	0	0	11	0	0	63	0	0	33	0	0	158	0	0	83	0	0
chr11	116137860	-	T	chr11:116137860	Fbf1,Mrpl38	LTR	Intron	regulatory_region_variant	0	0	116135521	2339	downstream	intronic	0	<0.001	<0.001	---	|	4.05931	0.0433	0.00259	0.0669	|	0	4	0	0	8	0	0	5	0	0	8	0	0	3	0	0	19	0	0	5	0	0	28	0	0
chr11	116188754	-	T	chr11:116188754	Acox1	SINE	Intron	regulatory_region_variant	0	0	-	-	-	-	1.32763	0.00251	<0.001	0.363	|	2.11268	0.088	0.0204	0.516	|	0	6	0	0	8	0	0	7	0	1	4	0.25	0	10	0	0	3	0	0	0	---	0	0	---	0
chr11	116581137	-	T	chr11:116581137	Ube2o	.	Exon	missense_variant	1	1	-	-	-	-	1.61831	0.11	0.0358	0.295	|	-0.0409481	0.808	0.831	0.747	|	10	166	0.060241	11	201	0.0547264	21	300	0.07	30	305	0.0983607	19	267	0.071161	29	235	0.123404	4	52	0.0769231	8	48	0.166667	0
chr11	116919269	+	A	chr11:116919269	Mgat5b	.	UTR	5_prime_UTR_variant	0	0	-	-	-	-	0	<0.001	<0.001	---	|	0.67162	0.0465	0.0292	0.729	|	0	0	---	---	---	---	---	---	---	0	0	---	0	0	---	0	0	---	0	0	---	---	---	---	0
chr11	116919281	+	A	chr11:116919281	Mgat5b	.	UTR	5_prime_UTR_variant	0	0	-	-	-	-	0	<0.001	<0.001	---	|	1.03169	0.00204	<0.001	0.374	|	0	0	---	---	---	---	---	---	---	0	0	---	0	0	---	0	0	---	0	0	---	---	---	---	0
chr11	117754444	+	A	chr11:117754444	Tnrc6c	SINE	Intron	non_coding_transcript_variant	0	0	117756357	1913	downstream	intronic	-0.528321	0.00219	0.00316	0.819	|	5.99439	0.15	0.00235	0.019	|	0	22	0	0	8	0	0	10	0	2	18	0.111111	0	10	0	0	7	0	2	2	1	0	4	0	0
chr11	119146561	-	T	chr11:119146561	Tbc1d16	.	UTR	3_prime_UTR_variant	0	0	-	-	-	-	0	<0.001	<0.001	---	|	0.856942	0.0141	0.00779	0.618	|	0	6	0	---	---	---	0	10	0	0	2	0	0	10	0	---	---	---	0	3	0	0	11	0	0
chr11	119146653	-	T	chr11:119146653	Gm26888,Tbc1d16	.	UTR	3_prime_UTR_variant	0	0	-	-	-	-	0	<0.001	<0.001	---	|	-1.22956	0.00477	0.0112	0.193	|	0	13	0	---	---	---	0	17	0	---	---	---	0	17	0	---	---	---	0	6	0	0	2	0	0
chr11	119146800	-	T	chr11:119146800	Gm26888,Tbc1d16	.	UTR	3_prime_UTR_variant	1	1	-	-	-	-	1.59179	0.00301	<0.001	0.363	|	0.645092	0.137	0.0874	0.0466	|	0	7	0	0	3	0	0	11	0	0	2	0	0	8	0	0	2	0	0	10	0	0	9	0	0
chr11	119898601	+	A	chr11:119898601	Rptor	.	UTR	3_prime_UTR_variant	0	0	-	-	-	-	-0.668045	0.00251	0.00399	0.609	|	0.786594	0.0102	0.00589	0.73	|	0	53	0	0	8	0	0	35	0	0	2	0	0	76	0	0	3	0	0	122	0	0	30	0	4
chr11	120100603	+	A	chr11:120100603	Ndufaf8,Slc38a10,Tepsin	SINE	UTR	3_prime_UTR_variant	0	0	-	-	-	-	0	<0.001	<0.001	---	|	2.50861	0.0123	0.00217	0.345	|	0	10	0	0	7	0	0	7	0	0	3	0	0	8	0	0	5	0	0	17	0	0	9	0	0
chr11	120100748	+	A	chr11:120100748	Ndufaf8,Slc38a10,Tepsin	SINE	intergenic	downstream_gene_variant	0	0	-	-	-	-	4.32193	0.02	<0.001	0.5	|	4.1167	0.0456	0.00263	0.215	|	---	---	---	4	6	0.666667	0	1	0	0	2	0	0	0	---	2	5	0.4	0	1	0	---	---	---	---
chr11	120559234	-	T	chr11:120559234	P4hb	SINE	intergenic	regulatory_region_variant	0	0	120558939	295	downstream	undefined	-4.84681	0.00427	0.123	0.189	|	-1.46804	0.00795	0.022	0.642	|	1	1	1	0	0	---	4	5	0.8	0	0	---	2	7	0.285714	1	3	0.333333	4	13	0.307692	---	---	---	---
chr11	120559256	-	T	chr11:120559256	P4hb	SINE	intergenic	regulatory_region_variant	0	0	120558488	768	downstream	undefined	0.103759	0.00508	0.00473	0.98	|	-4.70342	0.00219	0.057	0.0435	|	1	2	0.5	0	0	---	0	7	0	0	0	---	0	9	0	2	3	0.666667	0	10	0	---	---	---	---
chr11	120559262	-	T	chr11:120559262	P4hb	SINE	intergenic	regulatory_region_variant	0	0	-	-	-	-	-7.51682	0.00508	0.931	0.0546	|	-1.29722	0.0422	0.104	0.587	|	2	2	1	0	0	---	7	7	1	0	0	---	6	8	0.75	2	3	0.666667	8	10	0.8	---	---	---	---
chr11	120579091	-	T	chr11:120579091	Arhgdia,Gm3807	.	UTR	3_prime_UTR_variant	1	1	-	-	-	-	-1.14636	0.0223	0.0494	0.00651	|	-0.50951	0.0315	0.0448	0.332	|	63	1702	0.0370153	21	1768	0.0118778	53	1664	0.031851	33	1249	0.0264211	96	2235	0.042953	45	1881	0.0239234	205	3102	0.0660864	99	2776	0.0356628	85
chr11	120724816	-	T	chr11:120724816	Cbr2,Dcxr,Lrrc45,Rac3	SINE	intergenic	downstream_gene_variant	0	0	-	-	-	-	0	<0.001	<0.001	---	|	-0.579564	0.00707	0.0106	0.826	|	0	3	0	0	1	0	0	3	0	0	0	---	0	9	0	0	1	0	0	15	0	0	4	0	0
chr11	120958655	+	A	chr11:120958655	Csnk1d,Slc16a3	.	UTR	3_prime_UTR_variant	0	0	-	-	-	-	-1.12379	0.0183	0.0399	0.0737	|	-1.48065	0.0036	0.01	0.546	|	46	878	0.0523918	11	263	0.0418251	40	758	0.0527704	1	160	0.00625	26	929	0.0279871	2	271	0.00738007	71	1302	0.0545315	53	758	0.0699208	51
chr11	121253786	+	A	chr11:121253786	Narf	.	UTR	3_prime_UTR_variant	0	0	-	-	-	-	0.823903	0.00177	<0.001	0.363	|	2.10718	0.0211	0.00491	0.17	|	0	218	0	0	54	0	0	225	0	0	61	0	0	299	0	0	41	0	0	244	0	0	72	0	0
chr11	121323333	-	T	chr11:121323333	Wdr45b	SINE	intergenic	downstream_gene_variant	1	1	121324118	785	upstream	undefined	0	<0.001	<0.001	---	|	1.53119	0.007	0.00242	0.577	|	0	9	0	0	4	0	0	8	0	0	6	0	0	6	0	0	5	0	0	5	0	0	1	0	---
chr11	121323337	-	T	chr11:121323337	Wdr45b	SINE	intergenic	downstream_gene_variant	1	1	121324114	777	upstream	undefined	0	<0.001	<0.001	---	|	2.93296	0.00764	<0.001	0.178	|	0	9	0	0	4	0	0	8	0	0	5	0	0	6	0	0	6	0	0	6	0	---	---	---	---
chr11	121323342	+	A	chr11:121323342	Wdr45b	SINE	intergenic	downstream_gene_variant	0	0	121324109	767	downstream	undefined	0	<0.001	<0.001	---	|	4.37872	0.0208	<0.001	0.0706	|	0	9	0	0	4	0	0	8	0	0	5	0	0	6	0	0	7	0	0	6	0	---	---	---	---
chr11	121323350	-	T	chr11:121323350	Wdr45b	SINE	intergenic	downstream_gene_variant	1	1	121324101	751	upstream	undefined	0	<0.001	<0.001	---	|	1.13489	0.193	0.0877	0.477	|	0	8	0	0	4	0	0	9	0	0	6	0	0	6	0	0	6	0	0	6	0	---	---	---	---
chr11	121323355	-	T	chr11:121323355	Wdr45b	SINE	intergenic	downstream_gene_variant	1	1	121324096	741	upstream	undefined	0.226024	0.0405	0.0347	0.964	|	-0.0665151	0.424	0.444	0.934	|	1	8	0.125	0	4	0	0	9	0	2	6	0.333333	2	6	0.333333	1	5	0.2	0	4	0	---	---	---	---
chr11	121323387	-	T	chr11:121323387	Wdr45b	SINE	intergenic	downstream_gene_variant	0	0	-	-	-	-	0	<0.001	<0.001	---	|	-1.2099	0.0224	0.0517	0.497	|	0	6	0	0	3	0	0	5	0	0	10	0	0	5	0	0	3	0	0	1	0	---	---	---	---
chr11	121497128	+	A	chr11:121497128	Tbcd	.	Exon	missense_variant	0	0	-	-	-	-	-3.18793	<0.001	0.00911	0.0268	|	-0.290871	0.00288	0.00353	0.717	|	2	110	0.0181818	0	35	0	2	64	0.03125	0	32	0	2	96	0.0208333	0	24	0	3	62	0.0483871	0	26	0	0
chr12	3241846	+	A	chr12:3241846	Rab10os	.	Intron	non_coding_transcript_variant	0	0	-	-	-	-	0	<0.001	<0.001	---	|	-1.86411	<0.001	0.00364	0.178	|	0	25	0	0	15	0	0	9	0	0	13	0	0	11	0	0	17	0	0	22	0	0	18	0	0
chr12	3242647	+	A	chr12:3242647	Rab10,Rab10os	.	Intron	non_coding_transcript_variant	0	0	-	-	-	-	0	<0.001	<0.001	---	|	0.847573	0.0018	<0.001	0.374	|	0	14	0	0	47	0	0	11	0	0	23	0	0	28	0	0	21	0	0	18	0	0	25	0	0
chr12	3399208	+	A	chr12:3399208	1110002L01Rik,AC160138.1,Kif3c	SINE	Intron	non_coding_transcript_variant	0	0	3398315	893	upstream	intronic	0	<0.001	<0.001	---	|	5.81993	0.331	0.00587	0.0131	|	0	1	0	0	0	---	0	2	0	---	---	---	0	3	0	0	4	0	0	0	---	0	0	---	0
chr12	3399240	+	A	chr12:3399240	1110002L01Rik,AC160138.1,Kif3c	SINE	Intron	non_coding_transcript_variant	0	0	3398284	956	upstream	intronic	0	<0.001	<0.001	---	|	3.27719	0.0708	0.00731	0.208	|	0	0	---	0	0	---	0	1	0	---	---	---	0	3	0	0	4	0	0	0	---	0	0	---	0
chr12	3399251	+	A	chr12:3399251	1110002L01Rik,AC160138.1,Kif3c	SINE	Intron	non_coding_transcript_variant	1	1	3399733	482	downstream	intronic	0	<0.001	<0.001	---	|	5.97778	0.146	0.00232	0.0108	|	0	0	---	0	0	---	0	1	0	---	---	---	0	3	0	0	4	0	0	0	---	0	0	---	0
chr12	3399256	+	A	chr12:3399256	1110002L01Rik,AC160138.1,Kif3c	SINE	Intron	non_coding_transcript_variant	1	1	3399728	472	downstream	intronic	0	<0.001	<0.001	---	|	6.13333	0.163	0.00232	0.0146	|	0	0	---	0	0	---	0	1	0	---	---	---	0	3	0	0	4	0	0	0	---	0	0	---	0
chr12	3399267	+	A	chr12:3399267	1110002L01Rik,AC160138.1,Kif3c	SINE	Intron	non_coding_transcript_variant	1	1	3398258	1009	upstream	intronic	0	<0.001	<0.001	---	|	0.618309	0.695	0.453	0.109	|	0	0	---	0	0	---	0	1	0	---	---	---	0	3	0	0	4	0	0	0	---	0	0	---	0
chr12	3399268	+	A	chr12:3399268	1110002L01Rik,AC160138.1,Kif3c	SINE	Intron	non_coding_transcript_variant	0	0	3398258	1010	upstream	intronic	0	<0.001	<0.001	---	|	2.98142	0.184	0.0233	0.184	|	0	0	---	0	0	---	0	1	0	---	---	---	0	3	0	0	4	0	0	0	---	0	0	---	0
chr12	3400037	+	A	chr12:3400037	1110002L01Rik,AC160138.1,Kif3c	SINE	Intron	non_coding_transcript_variant	1	1	-	-	-	-	0	<0.001	<0.001	---	|	3.41443	0.0881	0.00826	0.169	|	0	1	0	0	2	0	0	3	0	---	---	---	0	1	0	0	0	---	0	0	---	0	0	---	0
chr12	3404167	+	A	chr12:3404167	1110002L01Rik,AC160138.1,Kif3c	SINE	UTR	3_prime_UTR_variant	0	0	-	-	-	-	-3.19041	<0.001	0.00913	0.184	|	0.337789	0.21	0.166	0.353	|	0	7	0	0	0	---	0	4	0	---	---	---	0	5	0	---	---	---	2	16	0.125	0	0	---	1
chr12	3404168	+	A	chr12:3404168	1110002L01Rik,AC160138.1,Kif3c	SINE	UTR	3_prime_UTR_variant	1	1	-	-	-	-	-1.69896	<0.001	0.00325	0.391	|	0.122398	0.364	0.335	0.579	|	0	8	0	0	0	---	0	4	0	---	---	---	0	6	0	---	---	---	0	16	0	0	0	---	2
chr12	3404229	+	A	chr12:3404229	1110002L01Rik,AC160138.1,Kif3c	SINE	UTR	3_prime_UTR_variant	1	1	-	-	-	-	0	<0.001	<0.001	---	|	0.988683	0.00198	<0.001	0.374	|	0	19	0	0	0	---	0	7	0	---	---	---	0	16	0	---	---	---	0	23	0	0	0	---	0
chr12	3404248	+	A	chr12:3404248	1110002L01Rik,AC160138.1,Kif3c	SINE	UTR	3_prime_UTR_variant	1	1	-	-	-	-	2.46006	0.0055	<0.001	0.391	|	0.235465	0.284	0.241	0.423	|	0	28	0	0	0	---	0	12	0	---	---	---	0	27	0	---	---	---	0	28	0	0	1	0	0
chr12	3404265	+	A	chr12:3404265	1110002L01Rik,AC160138.1,Kif3c	SINE	UTR	3_prime_UTR_variant	0	0	-	-	-	-	0	<0.001	<0.001	---	|	-0.442179	<0.001	0.00136	0.374	|	0	31	0	0	0	---	0	15	0	---	---	---	0	27	0	---	---	---	0	32	0	0	6	0	0
chr12	3404266	+	A	chr12:3404266	1110002L01Rik,AC160138.1,Kif3c	SINE	UTR	3_prime_UTR_variant	1	1	-	-	-	-	0	<0.001	<0.001	---	|	0.518426	0.0082	0.00572	0.71	|	0	31	0	0	0	---	0	15	0	---	---	---	0	27	0	---	---	---	0	32	0	0	6	0	0
chr12	3404616	+	A	chr12:3404616	1110002L01Rik,AC160138.1,Kif3c	SINE	UTR	3_prime_UTR_variant	0	0	3404273	343	upstream	UTR	0	<0.001	<0.001	---	|	0.00332845	0.1	0.0999	0.987	|	0	36	0	0	2	0	0	28	0	0	1	0	0	65	0	0	3	0	0	94	0	0	29	0	0
chr12	3404617	+	A	chr12:3404617	1110002L01Rik,AC160138.1,Kif3c	SINE	UTR	3_prime_UTR_variant	1	1	3404273	344	upstream	UTR	0	<0.001	<0.001	---	|	-0.354205	<0.001	0.00128	0.374	|	0	35	0	0	2	0	0	28	0	0	1	0	0	65	0	0	3	0	0	94	0	0	29	0	0
chr12	3404637	+	A	chr12:3404637	1110002L01Rik,AC160138.1,Kif3c	SINE	UTR	3_prime_UTR_variant	1	1	-	-	-	-	1.27398	0.00242	<0.001	0.363	|	-1.77998	0.00521	0.0179	0.104	|	0	35	0	0	2	0	0	25	0	0	1	0	0	60	0	0	3	0	0	97	0	0	34	0	0
chr12	3404647	+	A	chr12:3404647	1110002L01Rik,AC160138.1,Kif3c	SINE	UTR	3_prime_UTR_variant	0	0	-	-	-	-	2.67201	0.0103	0.00161	0.332	|	-0.127006	0.199	0.218	0.238	|	0	35	0	0	1	0	0	21	0	---	---	---	0	57	0	0	3	0	1	92	0.0108696	0	34	0	0
chr12	3404648	+	A	chr12:3404648	1110002L01Rik,AC160138.1,Kif3c	SINE	UTR	3_prime_UTR_variant	1	1	-	-	-	-	0	<0.001	<0.001	---	|	0.262925	0.0454	0.0379	0.0589	|	0	36	0	0	1	0	0	21	0	---	---	---	0	58	0	0	3	0	0	97	0	0	34	0	0
chr12	3404660	+	A	chr12:3404660	1110002L01Rik,AC160138.1,Kif3c	SINE	UTR	3_prime_UTR_variant	1	1	-	-	-	-	0	<0.001	<0.001	---	|	-0.281767	0.00225	0.00273	0.793	|	0	34	0	0	0	---	0	20	0	---	---	---	0	49	0	0	3	0	0	85	0	0	34	0	0
chr12	3405173	+	A	chr12:3405173	1110002L01Rik,AC160138.1,Kif3c	SINE	UTR	3_prime_UTR_variant	0	0	3404826	347	upstream	UTR	-1.64005	<0.001	0.00312	0.374	|	0.716029	0.0492	0.03	0.266	|	0	30	0	0	0	---	0	13	0	---	---	---	0	34	0	0	1	0	0	41	0	0	5	0	10
chr12	4107502	+	A	chr12:4107502	Dnajc27	.	UTR	regulatory_region_variant	0	0	-	-	-	-	1.84521	0.00359	<0.001	0.391	|	1.34022	0.0112	0.00443	0.275	|	0	18	0	0	0	---	0	11	0	---	---	---	0	27	0	0	6	0	0	10	0	0	20	0	---
chr12	4676237	+	A	chr12:4676237	Itsn2	.	Intron	3_prime_UTR_variant	0	0	-	-	-	-	-1.67266	0.00154	0.0049	0.104	|	-1.14256	0.00515	0.0114	0.662	|	7	205	0.0341463	0	117	0	8	113	0.0707965	1	76	0.0131579	1	175	0.00571429	0	91	0	0	45	0	0	25	0	0
chr12	4676238	+	A	chr12:4676238	Itsn2	.	Intron	3_prime_UTR_variant	0	0	-	-	-	-	-4.70414	0.00161	0.0419	0.0144	|	0.886009	0.0284	0.0153	0.67	|	14	205	0.0682927	2	116	0.0172414	11	111	0.0990991	0	77	0	5	175	0.0285714	0	91	0	4	44	0.0909091	0	19	0	0
chr12	4879399	-	T	chr12:4879399	Ubxn2a	SINE	UTR	3_prime_UTR_variant	0	0	4880945	1546	upstream	intronic	0.843149	0.00179	<0.001	0.363	|	1.2522	0.00969	0.00407	0.155	|	0	74	0	1	30	0.0333333	0	46	0	0	22	0	0	86	0	0	47	0	0	43	0	0	12	0	0
chr12	4879400	-	T	chr12:4879400	Ubxn2a	SINE	UTR	3_prime_UTR_variant	0	0	4880944	1544	upstream	intronic	0	<0.001	<0.001	---	|	1.75385	0.0157	0.00467	0.0778	|	0	74	0	0	30	0	0	46	0	0	22	0	0	87	0	0	46	0	0	43	0	0	12	0	0
chr12	4879452	-	T	chr12:4879452	Ubxn2a	SINE	UTR	3_prime_UTR_variant	0	0	4880883	1431	upstream	intronic	-0.756587	<0.001	0.00169	0.363	|	1.4358	0.0108	0.00398	0.338	|	0	67	0	0	19	0	1	43	0.0232558	0	23	0	0	77	0	0	38	0	0	44	0	0	22	0	0
chr12	8749773	+	A	chr12:8749773	Pum2	.	UTR	3_prime_UTR_variant	0	0	-	-	-	-	-2.17372	0.00189	0.00853	0.0208	|	-0.154023	0.00276	0.00308	0.861	|	8	624	0.0128205	1	813	0.00123001	8	492	0.0162602	2	519	0.00385356	11	697	0.0157819	7	726	0.00964187	3	160	0.01875	0	205	0	0
chr12	8750269	+	A	chr12:8750269	Pum2	.	UTR	3_prime_UTR_variant	1	1	-	-	-	-	-1.61475	0.152	0.465	7.43e-05	|	-0.734017	0.067	0.111	0.0981	|	99	210	0.471429	46	421	0.109264	20	50	0.4	38	260	0.146154	74	185	0.4	56	324	0.17284	84	198	0.424242	20	121	0.165289	30
chr12	8750270	+	A	chr12:8750270	Pum2	.	UTR	3_prime_UTR_variant	0	0	-	-	-	-	-1.54666	0.0607	0.177	0.0508	|	-4.16601	0.00219	0.0394	0.00988	|	42	209	0.200957	25	420	0.0595238	9	50	0.18	24	260	0.0923077	33	186	0.177419	28	325	0.0861538	36	202	0.178218	1	117	0.00854701	8
chr12	8750276	+	A	chr12:8750276	Pum2	.	UTR	3_prime_UTR_variant	0	0	8749781	495	upstream	UTR	-2.69141	0.0171	0.11	0.05	|	-2.05144	0.00319	0.0132	0.0639	|	25	217	0.115207	7	430	0.0162791	3	57	0.0526316	18	257	0.0700389	19	192	0.0989583	11	342	0.0321637	27	205	0.131707	2	112	0.0178571	8
chr12	11239416	-	T	chr12:11239416	Gen1	SINE	UTR	3_prime_UTR_variant	0	0	-	-	-	-	-1.99709	0.00721	0.0288	0.585	|	-2.71484	0.00788	0.0517	0.189	|	1	29	0.0344828	0	2	0	0	18	0	---	---	---	2	59	0.0338983	0	9	0	1	49	0.0204082	3	8	0.375	0
chr12	16985065	+	A	chr12:16985065	Pqlc3,Rock2	.	UTR	3_prime_UTR_variant	0	0	-	-	-	-	-3.21882	<0.001	0.00931	0.0363	|	-1.08798	0.0018	0.00383	0.563	|	9	252	0.0357143	0	143	0	0	163	0	0	111	0	4	289	0.0138408	0	140	0	16	132	0.121212	0	53	0	0
chr12	16989432	-	T	chr12:16989432	Pqlc3,Rock2	SINE	UTR	3_prime_UTR_variant	0	0	-	-	-	-	-0.947913	0.0195	0.0375	0.514	|	1.02671	0.0468	0.0229	0.0384	|	16	622	0.0257235	3	38	0.0789474	16	573	0.0279232	3	41	0.0731707	15	636	0.0235849	3	58	0.0517241	22	556	0.0395683	0	34	0	37
chr12	16989434	-	T	chr12:16989434	Pqlc3,Rock2	SINE	UTR	3_prime_UTR_variant	0	0	-	-	-	-	-0.64102	0.0639	0.0996	0.625	|	0.472025	0.0844	0.0609	0.0609	|	52	635	0.0818898	8	38	0.210526	57	574	0.0993031	6	43	0.139535	46	646	0.0712074	13	60	0.216667	53	554	0.0956679	2	34	0.0588235	56
chr12	17429598	+	A	chr12:17429598	Nol10	SINE	UTR	3_prime_UTR_variant	0	0	17429879	281	downstream	UTR	-4.00134	0.0101	0.161	0.0365	|	0.795336	0.13	0.075	0.33	|	7	41	0.170732	0	1	0	3	23	0.130435	0	12	0	4	33	0.121212	1	11	0.0909091	6	44	0.136364	9	70	0.128571	9
chr12	17429608	+	A	chr12:17429608	Nol10	SINE	UTR	3_prime_UTR_variant	0	0	17429869	261	downstream	UTR	-3.56493	0.0133	0.157	0.0637	|	0.634174	0.07	0.0451	0.207	|	3	38	0.0789474	0	2	0	3	22	0.136364	2	9	0.222222	7	34	0.205882	0	9	0	9	43	0.209302	11	70	0.157143	2
chr12	17429660	+	A	chr12:17429660	Nol10	SINE	UTR	3_prime_UTR_variant	0	0	17429825	165	downstream	UTR	-3.56534	0.00429	0.0508	0.0628	|	0.369519	0.0299	0.0232	0.706	|	2	19	0.105263	0	4	0	2	15	0.133333	1	5	0.2	2	17	0.117647	0	11	0	2	24	0.0833333	1	32	0.03125	2
chr12	17429666	+	A	chr12:17429666	Nol10	SINE	UTR	3_prime_UTR_variant	0	0	17429820	154	downstream	UTR	-4.48192	0.00179	0.0401	0.0213	|	0.185432	0.0264	0.0232	0.834	|	2	18	0.111111	0	4	0	1	15	0.0666667	0	4	0	3	17	0.176471	0	10	0	1	21	0.047619	1	30	0.0333333	1
chr12	17429671	+	A	chr12:17429671	Nol10	SINE	UTR	3_prime_UTR_variant	0	0	17429816	145	downstream	UTR	-1.03656	0.00194	0.00397	0.59	|	3.2237	0.0303	0.00324	0.223	|	0	16	0	0	4	0	1	15	0.0666667	0	4	0	1	17	0.0588235	0	9	0	0	20	0	1	19	0.0526316	0
chr12	17429675	+	A	chr12:17429675	Nol10	SINE	UTR	3_prime_UTR_variant	0	0	17429811	136	downstream	UTR	-5.64279	0.0047	0.235	0.0102	|	0.258664	0.0108	0.00906	0.901	|	5	15	0.333333	0	4	0	6	14	0.428571	0	4	0	2	16	0.125	0	9	0	7	20	0.35	1	14	0.0714286	2
chr12	17429685	+	A	chr12:17429685	Nol10	SINE	UTR	3_prime_UTR_variant	0	0	17429802	117	downstream	UTR	-2.52409	0.00624	0.0359	0.368	|	0.81411	0.0668	0.038	0.0866	|	1	14	0.0714286	0	4	0	3	12	0.25	0	4	0	3	16	0.1875	0	8	0	7	11	0.636364	1	6	0.166667	0
chr12	17429808	+	A	chr12:17429808	Nol10	SINE	UTR	regulatory_region_variant	1	1	17429679	129	upstream	UTR	-4.2096	0.011	0.204	0.0284	|	1.71701	0.0765	0.0233	0.308	|	3	16	0.1875	0	15	0	1	10	0.1	0	6	0	8	39	0.205128	1	6	0.166667	20	70	0.285714	5	40	0.125	11
chr12	17429845	+	A	chr12:17429845	Nol10	SINE	UTR	regulatory_region_variant	0	0	17429638	207	upstream	UTR	-3.70698	0.00264	0.0345	0.0429	|	0.263386	0.123	0.103	0.685	|	3	38	0.0789474	0	19	0	4	25	0.16	0	7	0	4	48	0.0833333	0	15	0	3	161	0.0186335	2	107	0.0186916	0
chr12	17429853	+	A	chr12:17429853	Nol10	SINE	UTR	regulatory_region_variant	0	0	17429624	229	upstream	UTR	-3.90426	0.0017	0.0254	0.0133	|	-0.377437	0.0175	0.0227	0.762	|	2	45	0.0444444	0	20	0	2	27	0.0740741	0	7	0	4	52	0.0769231	0	18	0	2	176	0.0113636	0	124	0	0
chr12	17429859	+	A	chr12:17429859	Nol10	SINE	UTR	regulatory_region_variant	1	1	17429618	241	upstream	UTR	-2.18088	0.0593	0.269	0.159	|	0.745772	0.184	0.11	0.0959	|	10	44	0.227273	1	20	0.05	10	26	0.384615	0	7	0	14	52	0.269231	4	19	0.210526	31	187	0.165775	21	136	0.154412	36
chr12	17429884	+	A	chr12:17429884	Nol10	SINE	UTR	regulatory_region_variant	0	0	17429595	289	upstream	UTR	-3.83397	0.0107	0.153	0.068	|	1.00462	0.299	0.149	0.0252	|	15	50	0.3	0	24	0	9	33	0.272727	3	15	0.2	11	62	0.177419	0	20	0	18	203	0.08867	9	139	0.0647482	12
chr12	17429885	+	A	chr12:17429885	Nol10	SINE	UTR	regulatory_region_variant	0	0	17429594	291	upstream	UTR	0.040172	0.0243	0.0236	0.985	|	1.42791	0.106	0.0392	0.00208	|	9	50	0.18	0	24	0	0	34	0	3	15	0.2	7	63	0.111111	1	20	0.05	18	203	0.08867	7	140	0.05	2
chr12	17429889	+	A	chr12:17429889	Nol10	SINE	UTR	regulatory_region_variant	0	0	17429589	300	upstream	UTR	-2.18242	0.0202	0.0918	0.165	|	1.04892	0.124	0.0599	0.00603	|	3	53	0.0566038	0	23	0	2	34	0.0588235	3	15	0.2	9	67	0.134328	1	21	0.047619	20	198	0.10101	11	134	0.0820896	10
chr12	17429890	+	A	chr12:17429890	Nol10	SINE	UTR	regulatory_region_variant	0	0	17429588	302	upstream	UTR	-5.74503	0.0018	0.0963	0.000442	|	1.06186	0.104	0.0498	0.0523	|	4	53	0.0754717	0	22	0	2	35	0.0571429	0	15	0	6	67	0.0895522	0	21	0	31	196	0.158163	0	135	0	8
chr12	17429891	+	A	chr12:17429891	Nol10	SINE	UTR	regulatory_region_variant	0	0	17429588	303	upstream	UTR	-0.752602	0.0103	0.0173	0.499	|	1.30403	0.0557	0.0225	0.0559	|	0	53	0	0	23	0	1	36	0.0277778	0	15	0	3	67	0.0447761	2	21	0.0952381	14	196	0.0714286	2	135	0.0148148	6
chr12	17930231	+	A	chr12:17930231	B430203G13Rik,CT030170.4,CT030170.6	LTR	Intron	non_coding_transcript_variant	0	0	-	-	-	-	-2.09558	0.00589	0.0252	0.442	|	0.0161237	0.00187	0.00185	0.991	|	1	12	0.0833333	0	0	---	0	16	0	1	4	0.25	4	21	0.190476	0	0	---	4	25	0.16	0	7	0	0
chr12	20898412	-	T	chr12:20898412	3110053B16Rik,Gm10478,Zfp125	SINE	Intron	non_coding_transcript_variant	0	0	-	-	-	-	0.0745765	0.00255	0.00242	0.972	|	-3.44015	0.00577	0.0627	0.094	|	0	0	---	0	0	---	0	3	0	0	0	---	1	5	0.2	0	1	0	0	1	0	0	0	---	0
chr12	20898473	-	T	chr12:20898473	3110053B16Rik,Gm10478,Zfp125	SINE	Intron	non_coding_transcript_variant	0	0	20897080	1393	downstream	intronic	-1.23014	<0.001	0.00235	0.363	|	-2.82513	0.00699	0.0495	0.173	|	0	1	0	0	0	---	0	3	0	0	0	---	1	6	0.166667	0	0	---	0	0	---	0	0	---	0
chr12	20898485	-	T	chr12:20898485	3110053B16Rik,Gm10478,Zfp125	SINE	Intron	non_coding_transcript_variant	0	0	20897066	1419	downstream	intronic	1.42512	0.00269	<0.001	0.363	|	-3.28558	0.00266	0.0259	0.123	|	0	1	0	0	0	---	0	4	0	0	0	---	0	6	0	0	0	---	0	0	---	0	0	---	0
chr12	21047276	+	A	chr12:21047276	Gm21989,Gm5977	SINE	Intron	non_coding_transcript_variant	0	0	21045592	1684	upstream	intronic	0	<0.001	<0.001	---	|	0.412651	0.426	0.32	0.333	|	0	0	---	0	0	---	---	---	---	---	---	---	0	0	---	0	0	---	---	---	---	2	2	1	0
chr12	21047319	+	A	chr12:21047319	Gm21989,Gm5977	SINE	Intron	non_coding_transcript_variant	0	0	21045547	1772	upstream	intronic	0	<0.001	<0.001	---	|	-2.19592	0.00782	0.0358	0.342	|	0	0	---	0	0	---	---	---	---	---	---	---	0	0	---	0	0	---	---	---	---	0	3	0	0
chr12	21047335	+	A	chr12:21047335	Gm21989,Gm5977	SINE	Intron	non_coding_transcript_variant	0	0	-	-	-	-	0	<0.001	<0.001	---	|	-0.171469	0.0284	0.032	0.937	|	0	0	---	0	0	---	0	0	---	---	---	---	0	0	---	0	0	---	---	---	---	3	3	1	0
chr12	21561581	+	A	chr12:21561581	-	LINE	intergenic	intergenic_variant	1	1	-	-	-	-	0	<0.001	<0.001	---	|	-1.72776	0.0153	0.0506	0.324	|	0	9	0	0	0	---	0	4	0	0	0	---	0	5	0	0	0	---	0	1	0	0	0	---	0
chr12	21561587	+	A	chr12:21561587	-	LINE	intergenic	intergenic_variant	1	1	-	-	-	-	-1.66096	<0.001	0.00316	0.363	|	0.0475333	0.0603	0.0583	0.981	|	0	11	0	0	0	---	0	5	0	0	0	---	0	6	0	0	0	---	1	1	1	0	0	---	0
chr12	21561593	+	A	chr12:21561593	-	LINE	intergenic	intergenic_variant	0	0	-	-	-	-	0	<0.001	<0.001	---	|	-1.00529	0.00267	0.00536	0.452	|	0	11	0	0	0	---	0	6	0	0	0	---	0	5	0	0	0	---	0	1	0	0	0	---	0
chr12	21561608	+	A	chr12:21561608	-	LINE	intergenic	intergenic_variant	1	1	-	-	-	-	-1.66096	<0.001	0.00316	0.363	|	1.87671	0.215	0.0585	0.376	|	0	9	0	0	0	---	0	5	0	0	0	---	0	4	0	0	0	---	1	1	1	0	0	---	0
chr12	21561615	+	A	chr12:21561615	-	LINE	intergenic	intergenic_variant	0	0	-	-	-	-	0	<0.001	<0.001	---	|	4.44393	0.0218	<0.001	0.0733	|	0	9	0	0	0	---	0	5	0	0	0	---	0	3	0	0	0	---	---	---	---	0	0	---	0
chr12	21561620	+	A	chr12:21561620	-	LINE	intergenic	intergenic_variant	0	0	-	-	-	-	0	<0.001	<0.001	---	|	-1.14357	<0.001	0.00221	0.374	|	0	9	0	0	0	---	0	6	0	0	0	---	0	6	0	0	0	---	---	---	---	0	0	---	0
chr12	21561623	+	A	chr12:21561623	-	LINE	intergenic	intergenic_variant	1	1	-	-	-	-	0	<0.001	<0.001	---	|	0.510153	0.0654	0.0459	0.822	|	0	8	0	0	0	---	0	6	0	0	0	---	0	6	0	0	0	---	---	---	---	0	0	---	0
chr12	21561627	+	A	chr12:21561627	-	LINE	intergenic	intergenic_variant	0	0	-	-	-	-	1.99316	0.00398	<0.001	0.374	|	0.170085	0.0185	0.0164	0.94	|	0	8	0	0	0	---	0	6	0	0	0	---	0	6	0	0	0	---	---	---	---	0	0	---	0
chr12	21561630	+	A	chr12:21561630	-	LINE	intergenic	intergenic_variant	0	0	-	-	-	-	0	<0.001	<0.001	---	|	2.01585	0.0246	0.00609	0.452	|	0	8	0	0	0	---	0	6	0	0	0	---	0	6	0	0	0	---	---	---	---	0	0	---	0
chr12	21561631	+	A	chr12:21561631	-	LINE	intergenic	intergenic_variant	1	1	-	-	-	-	0	<0.001	<0.001	---	|	0.106828	0.0876	0.0814	0.963	|	0	8	0	0	0	---	0	6	0	0	0	---	0	6	0	0	0	---	---	---	---	0	0	---	0
chr12	21561642	+	A	chr12:21561642	-	LINE	intergenic	intergenic_variant	0	0	-	-	-	-	0	<0.001	<0.001	---	|	2.15463	0.027	0.00607	0.147	|	0	9	0	0	0	---	0	7	0	0	0	---	0	6	0	0	0	---	---	---	---	0	0	---	0
chr12	21561673	+	A	chr12:21561673	-	LINE	intergenic	intergenic_variant	0	0	-	-	-	-	0	<0.001	<0.001	---	|	1.99023	0.0219	0.00552	0.286	|	0	6	0	0	0	---	0	5	0	0	0	---	0	9	0	0	0	---	---	---	---	0	0	---	0
chr12	21561809	+	A	chr12:21561809	-	LINE	intergenic	intergenic_variant	0	0	-	-	-	-	0	<0.001	<0.001	---	|	-1.26715	0.00718	0.0173	0.4	|	0	5	0	0	0	---	0	3	0	0	0	---	0	11	0	0	0	---	---	---	---	0	0	---	0
chr12	21561811	+	A	chr12:21561811	-	LINE	intergenic	intergenic_variant	1	1	-	-	-	-	1.99316	0.00398	<0.001	0.374	|	0.0244512	0.124	0.122	0.993	|	0	6	0	0	0	---	0	3	0	0	0	---	0	11	0	0	0	---	---	---	---	0	0	---	0
chr12	21561814	+	A	chr12:21561814	-	LINE	intergenic	intergenic_variant	1	1	-	-	-	-	1.99316	0.00398	<0.001	0.374	|	-0.684293	0.0341	0.0548	0.811	|	0	5	0	0	0	---	0	3	0	0	0	---	0	12	0	0	0	---	---	---	---	0	0	---	0
chr12	21561820	+	A	chr12:21561820	-	LINE	intergenic	intergenic_variant	1	1	-	-	-	-	0.716993	0.00398	0.00242	0.798	|	1.11489	0.567	0.262	0.0518	|	0	7	0	0	0	---	0	4	0	0	0	---	1	12	0.0833333	0	0	---	---	---	---	0	0	---	0
chr12	21561858	+	A	chr12:21561858	-	LINE	intergenic	intergenic_variant	0	0	-	-	-	-	-2.96046	<0.001	0.00778	0.178	|	3.57639	0.36	0.0302	0.168	|	1	5	0.2	0	0	---	0	4	0	0	0	---	1	7	0.142857	0	0	---	---	---	---	0	0	---	0
chr12	21562024	+	A	chr12:21562024	-	LINE	intergenic	intergenic_variant	0	0	21563780	1756	downstream	intergenic	-1.99316	<0.001	0.00398	0.374	|	-0.0830075	0.922	0.977	0.557	|	7	7	1	0	0	---	0	1	0	0	0	---	0	0	---	0	0	---	---	---	---	0	0	---	0
chr12	21562030	+	A	chr12:21562030	-	LINE	intergenic	intergenic_variant	1	1	21563775	1745	downstream	undefined	1.99316	0.00398	<0.001	0.374	|	-1.99717	0.132	0.526	0.318	|	0	7	0	0	0	---	0	1	0	0	0	---	0	0	---	0	0	---	---	---	---	0	0	---	0
chr12	21562033	+	A	chr12:21562033	-	LINE	intergenic	intergenic_variant	0	0	21563772	1739	downstream	undefined	0.244478	0.00398	0.00336	0.938	|	0.238529	0.771	0.654	0.193	|	3	7	0.428571	0	0	---	0	1	0	0	0	---	0	0	---	0	0	---	---	---	---	0	0	---	0
chr12	21562034	+	A	chr12:21562034	-	LINE	intergenic	intergenic_variant	1	1	21563771	1737	downstream	undefined	0.561471	0.00398	0.0027	0.847	|	0.00766187	0.279	0.278	0.987	|	1	7	0.142857	0	0	---	0	1	0	0	0	---	0	0	---	0	0	---	---	---	---	0	0	---	0
chr12	21563754	+	A	chr12:21563754	-	LINE	intergenic	intergenic_variant	0	0	21562046	1708	upstream	undefined	1.66096	0.00316	<0.001	0.363	|	1.24576	0.0577	0.0243	0.697	|	0	4	0	0	1	0	0	3	0	0	0	---	0	8	0	1	1	1	0	2	0	0	0	---	0
chr12	21563759	+	A	chr12:21563759	-	LINE	intergenic	intergenic_variant	0	0	21562045	1714	upstream	undefined	0	<0.001	<0.001	---	|	-1.54635	0.00584	0.0171	0.444	|	0	4	0	0	1	0	0	3	0	0	0	---	0	8	0	0	1	0	0	3	0	0	0	---	0
chr12	21563778	+	A	chr12:21563778	-	LINE	intergenic	intergenic_variant	0	0	-	-	-	-	1.66096	0.00316	<0.001	0.363	|	1.32294	0.0188	0.0075	0.672	|	0	2	0	0	1	0	0	3	0	0	0	---	0	6	0	1	1	1	0	4	0	0	0	---	0
chr12	21563934	+	A	chr12:21563934	-	LINE	intergenic	intergenic_variant	0	0	-	-	-	-	-1.43169	<0.001	0.0027	0.374	|	-2.28746	0.015	0.0732	0.409	|	0	3	0	0	1	0	0	5	0	0	0	---	2	14	0.142857	0	2	0	---	---	---	0	0	---	0
chr12	21563938	+	A	chr12:21563938	-	LINE	intergenic	intergenic_variant	0	0	-	-	-	-	0	<0.001	<0.001	---	|	-4.96947	0.00552	0.173	0.0145	|	0	3	0	0	1	0	0	5	0	0	0	---	0	15	0	0	2	0	---	---	---	0	0	---	0
chr12	21564021	+	A	chr12:21564021	-	LINE	intergenic	intergenic_variant	0	0	-	-	-	-	-1.46598	0.00251	0.00693	0.431	|	0.0126709	0.323	0.32	0.979	|	0	4	0	0	0	---	0	7	0	0	1	0	1	9	0.111111	1	4	0.25	0	2	0	0	0	---	0
chr12	21564024	+	A	chr12:21564024	-	LINE	intergenic	intergenic_variant	0	0	-	-	-	-	0	<0.001	<0.001	---	|	0.220702	0.218	0.187	0.674	|	0	4	0	0	0	---	0	7	0	0	1	0	0	9	0	0	4	0	0	2	0	0	0	---	0
chr12	21564027	+	A	chr12:21564027	-	LINE	intergenic	intergenic_variant	0	0	-	-	-	-	0.0283208	0.00794	0.00778	0.992	|	-0.338591	0.574	0.726	0.326	|	0	4	0	0	0	---	0	7	0	1	1	1	2	9	0.222222	1	4	0.25	0	2	0	0	0	---	0
chr12	21564034	+	A	chr12:21564034	-	LINE	intergenic	intergenic_variant	0	0	-	-	-	-	-3.05777	<0.001	0.00833	0.177	|	0.32977	0.4	0.318	0.484	|	0	2	0	0	0	---	0	7	0	0	1	0	3	9	0.333333	0	2	0	0	2	0	0	0	---	5
chr12	21564042	+	A	chr12:21564042	-	LINE	intergenic	intergenic_variant	0	0	-	-	-	-	0	<0.001	<0.001	---	|	-1.20387	0.0417	0.096	0.497	|	0	2	0	0	0	---	0	7	0	0	1	0	0	9	0	0	1	0	0	2	0	0	0	---	0
chr12	21564052	+	A	chr12:21564052	-	LINE	intergenic	intergenic_variant	0	0	-	-	-	-	0	<0.001	<0.001	---	|	0.357816	0.286	0.224	0.676	|	0	2	0	0	0	---	0	6	0	0	1	0	0	9	0	0	2	0	0	2	0	0	0	---	0
chr12	21564064	+	A	chr12:21564064	-	LINE	intergenic	intergenic_variant	0	0	21561749	2315	upstream	undefined	-1.66096	<0.001	0.00316	0.363	|	0.345405	0.255	0.201	0.671	|	0	2	0	0	0	---	0	6	0	0	1	0	0	7	0	0	2	0	0	4	0	0	0	---	0
chr12	21564075	+	A	chr12:21564075	-	LINE	intergenic	intergenic_variant	0	0	21561736	2339	upstream	undefined	0	<0.001	<0.001	---	|	0.556289	0.455	0.309	0.0491	|	0	3	0	0	0	---	0	7	0	0	1	0	0	8	0	0	2	0	0	4	0	0	0	---	0
chr12	21564239	+	A	chr12:21564239	-	LINE	intergenic	intergenic_variant	0	0	-	-	-	-	0	<0.001	<0.001	---	|	2.51752	0.0479	0.00837	0.45	|	0	3	0	0	0	---	0	2	0	0	1	0	0	1	0	0	0	---	0	3	0	0	0	---	0
chr12	21564249	+	A	chr12:21564249	-	LINE	intergenic	intergenic_variant	0	0	-	-	-	-	0	<0.001	<0.001	---	|	1.80518	0.102	0.0291	0.296	|	0	3	0	0	0	---	0	3	0	0	2	0	0	1	0	0	0	---	0	4	0	0	0	---	0
chr12	25060270	+	A	chr12:25060270	CT010478.3,Kidins220	SINE	intergenic	intron_variant	1	1	-	-	-	-	0	<0.001	<0.001	---	|	-1.22991	0.123	0.289	0.531	|	0	7	0	0	0	---	0	5	0	0	0	---	0	3	0	0	0	---	0	8	0	0	16	0	0
chr12	25060276	+	A	chr12:25060276	CT010478.3,Kidins220	SINE	intergenic	intron_variant	1	1	25060171	105	upstream	undefined	0	<0.001	<0.001	---	|	2.59734	0.00605	<0.001	0.179	|	0	7	0	0	0	---	0	5	0	0	0	---	0	3	0	0	0	---	0	8	0	0	16	0	0
chr12	25060283	+	A	chr12:25060283	CT010478.3,Kidins220	SINE	intergenic	intron_variant	1	1	25060165	118	upstream	undefined	0	<0.001	<0.001	---	|	-1.19316	<0.001	0.00229	0.374	|	0	7	0	0	0	---	0	5	0	0	0	---	0	3	0	0	0	---	0	6	0	0	16	0	0
chr12	25060293	+	A	chr12:25060293	CT010478.3,Kidins220	SINE	intergenic	intron_variant	1	1	-	-	-	-	-1.23014	0.00316	0.00742	0.524	|	0.110708	0.602	0.557	0.652	|	0	9	0	0	0	---	0	4	0	0	0	---	0	5	0	0	0	---	1	6	0.166667	16	16	1	0
chr12	25060296	+	A	chr12:25060296	CT010478.3,Kidins220	SINE	intergenic	intron_variant	1	1	-	-	-	-	-1.66096	<0.001	0.00316	0.363	|	1.97312	0.0692	0.0176	0.524	|	0	9	0	0	0	---	0	4	0	0	0	---	0	5	0	0	0	---	0	6	0	0	16	0	0
chr12	25060305	+	A	chr12:25060305	CT010478.3,Kidins220	SINE	intergenic	intron_variant	1	1	-	-	-	-	0	<0.001	<0.001	---	|	0.431201	0.00658	0.00488	0.839	|	0	7	0	0	0	---	0	4	0	0	0	---	0	5	0	0	0	---	0	6	0	0	16	0	0
chr12	30017480	+	A	chr12:30017480	Pxdn	.	UTR	3_prime_UTR_variant	0	0	-	-	-	-	0	<0.001	<0.001	---	|	-0.238667	0.0194	0.0228	0.626	|	---	---	---	0	2	0	---	---	---	---	---	---	0	3	0	0	6	0	0	16	0	0	14	0	0
chr12	31330816	-	T	chr12:31330816	Dld,Lamb1	SINE	intergenic	downstream_gene_variant	0	0	31328813	2003	downstream	intronic	---	---	---	---	|	1.17586	0.0292	0.0129	0.633	|	---	---	---	0	0	---	---	---	---	---	---	---	0	2	0	---	---	---	---	---	---	0	4	0	2
chr12	31331883	-	T	chr12:31331883	Dld,Lamb1	.	UTR	3_prime_UTR_variant	0	0	-	-	-	-	-2.51339	0.00317	0.0181	0.0278	|	-1.00221	0.0046	0.00921	0.011	|	9	326	0.0276074	0	288	0	5	246	0.0203252	0	322	0	5	400	0.0125	2	396	0.00505051	15	821	0.0182704	9	627	0.0143541	17
chr12	33375822	+	A	chr12:33375822	Atxn7l1,Atxn7l1os2	.	Intron	non_coding_transcript_variant	0	0	33376345	523	downstream	intronic	-6.36432	<0.001	0.0824	0.0002	|	-2.94919	0.00744	0.0574	0.201	|	10	82	0.121951	---	---	---	4	39	0.102564	0	4	0	6	74	0.0810811	---	---	---	4	87	0.045977	0	12	0	6
chr12	33438725	+	A	chr12:33438725	Twistnb	.	UTR	3_prime_UTR_variant	0	0	-	-	-	-	-3.15852	<0.001	0.00893	0.0288	|	0	<0.001	<0.001	---	|	3	115	0.026087	0	26	0	1	90	0.0111111	0	24	0	6	129	0.0465116	0	60	0	5	133	0.037594	0	57	0	0
chr12	33439572	+	A	chr12:33439572	Twistnb	LINE	UTR	3_prime_UTR_variant	0	0	-	-	-	-	0	<0.001	<0.001	---	|	2.84642	0.0143	0.00198	0.1	|	0	72	0	0	59	0	0	55	0	0	49	0	0	83	0	0	73	0	0	54	0	0	63	0	0
chr12	40026981	-	T	chr12:40026981	Arl4a	SINE	intergenic	regulatory_region_variant	0	0	-	-	-	-	1.4943	0.00282	<0.001	0.363	|	1.89078	0.0665	0.0179	0.499	|	0	3	0	0	2	0	0	2	0	0	0	---	0	2	0	0	1	0	0	2	0	0	2	0	0
chr12	40026982	-	T	chr12:40026982	Arl4a	SINE	intergenic	regulatory_region_variant	0	0	-	-	-	-	1.4943	0.00282	<0.001	0.363	|	0.802011	0.292	0.168	0.203	|	0	3	0	0	2	0	0	2	0	0	0	---	0	2	0	0	1	0	0	2	0	0	2	0	0
chr12	40031012	-	T	chr12:40031012	Arl4a	SINE	intergenic	NMD_transcript_variant	0	0	-	-	-	-	1.27398	0.00242	<0.001	0.363	|	2.21729	0.471	0.101	0.194	|	0	0	---	0	4	0	0	1	0	1	5	0.2	0	0	---	0	6	0	0	0	---	0	0	---	0
chr12	40031015	-	T	chr12:40031015	Arl4a	SINE	intergenic	NMD_transcript_variant	0	0	-	-	-	-	1.27398	0.00242	<0.001	0.363	|	1.94632	0.232	0.0601	0.321	|	0	1	0	0	4	0	0	1	0	1	5	0.2	0	0	---	0	6	0	0	0	---	0	0	---	0
chr12	40210523	-	T	chr12:40210523	Gm17024,Ifrd1	.	Intron	non_coding_transcript_variant	0	0	-	-	-	-	0.936668	0.00191	<0.001	0.363	|	4.76539	0.172	0.00631	0.0443	|	0	29	0	0	64	0	0	17	0	0	16	0	0	28	0	3	61	0.0491803	0	6	0	0	2	0	0
chr12	40210528	-	T	chr12:40210528	Gm17024,Ifrd1	.	Intron	non_coding_transcript_variant	1	1	-	-	-	-	0.212486	0.00366	0.00316	0.932	|	0.889492	0.497	0.268	0.0708	|	0	29	0	1	57	0.0175439	0	18	0	0	16	0	0	26	0	8	58	0.137931	0	6	0	0	2	0	5
chr12	40210534	-	T	chr12:40210534	Gm17024,Ifrd1	.	Intron	non_coding_transcript_variant	1	1	40209749	785	downstream	intronic	-0.659033	0.002	0.00316	0.767	|	0.0538921	0.0699	0.0674	0.983	|	0	31	0	0	56	0	0	16	0	0	16	0	0	25	0	4	62	0.0645161	0	6	0	0	2	0	5
chr12	40210539	-	T	chr12:40210539	Gm17024,Ifrd1	.	Intron	non_coding_transcript_variant	0	0	40209744	795	downstream	intronic	0.693072	0.00162	<0.001	0.363	|	3.89506	0.0429	0.00289	0.0754	|	0	34	0	1	56	0.0178571	0	15	0	0	18	0	0	22	0	0	62	0	0	6	0	0	2	0	0
chr12	40210542	-	T	chr12:40210542	Gm17024,Ifrd1	.	Intron	non_coding_transcript_variant	1	1	40209741	801	downstream	intronic	1.13264	0.00219	<0.001	0.363	|	0.508687	0.454	0.319	0.207	|	0	33	0	0	56	0	0	16	0	0	17	0	0	22	0	7	63	0.111111	0	6	0	0	2	0	0
chr12	40210545	-	T	chr12:40210545	Gm17024,Ifrd1	.	Intron	non_coding_transcript_variant	1	1	40209738	807	downstream	intronic	0	<0.001	<0.001	---	|	2.92776	0.0702	0.00922	0.194	|	0	33	0	0	55	0	0	14	0	0	17	0	0	21	0	0	63	0	0	6	0	0	2	0	0
chr12	40210572	-	T	chr12:40210572	Gm17024,Ifrd1	.	Intron	non_coding_transcript_variant	0	0	-	-	-	-	0.921396	0.00189	<0.001	0.363	|	2.85476	0.152	0.021	0.184	|	0	38	0	0	57	0	0	18	0	0	21	0	0	20	0	3	65	0.0461538	0	6	0	0	0	---	0
chr12	40210573	-	T	chr12:40210573	Gm17024,Ifrd1	.	Intron	non_coding_transcript_variant	1	1	-	-	-	-	1.08806	0.00213	<0.001	0.363	|	2.58559	0.462	0.0769	0.189	|	0	37	0	0	57	0	0	18	0	0	21	0	0	19	0	6	65	0.0923077	0	6	0	0	0	---	0
chr12	40210614	-	T	chr12:40210614	Gm17024,Ifrd1	.	Intron	non_coding_transcript_variant	0	0	40209673	941	downstream	exonic	0	<0.001	<0.001	---	|	3.07745	0.059	0.00699	0.346	|	0	34	0	0	45	0	0	18	0	0	29	0	0	22	0	0	47	0	0	3	0	0	0	---	0
chr12	40210615	-	T	chr12:40210615	Gm17024,Ifrd1	.	Intron	non_coding_transcript_variant	0	0	40209665	950	downstream	exonic	0	<0.001	<0.001	---	|	0.9673	0.119	0.0608	0.0287	|	0	34	0	0	45	0	0	18	0	0	30	0	0	21	0	0	47	0	0	3	0	0	0	---	0
chr12	44601068	+	A	chr12:44601068	Nrcam	SINE	intergenic	non_coding_transcript_exon_variant	0	0	-	-	-	-	0	<0.001	<0.001	---	|	-2.52257	0.00958	0.055	0.0775	|	---	---	---	---	---	---	---	---	---	---	---	---	---	---	---	---	---	---	0	7	0	0	5	0	---
chr12	46700334	-	T	chr12:46700334	AC108802.1,Nova1	.	Exon	missense_variant	1	1	46700406	72	upstream	exonic	0	<0.001	<0.001	---	|	-0.574348	0.0198	0.0295	0.533	|	---	---	---	---	---	---	---	---	---	---	---	---	---	---	---	---	---	---	0	6	0	0	9	0	0
chr12	51829639	-	T	chr12:51829639	Hectd1	.	intergenic	regulatory_region_variant	0	0	-	-	-	-	0	<0.001	<0.001	---	|	0	<0.001	<0.001	---	|	0	42	0	0	54	0	0	35	0	0	23	0	0	38	0	0	35	0	0	13	0	0	10	0	0
chr12	54671755	-	T	chr12:54671755	Eapp,Gm24971	SINE	UTR	3_prime_UTR_variant	0	0	54669499	2256	downstream	undefined	-2.20555	0.00276	0.0127	0.208	|	0.353334	0.206	0.161	0.177	|	0	46	0	0	2	0	3	24	0.125	0	6	0	1	40	0.025	0	3	0	4	69	0.057971	7	16	0.4375	1
chr12	54671771	-	T	chr12:54671771	Eapp,Gm24971	SINE	UTR	3_prime_UTR_variant	0	0	54669481	2290	downstream	undefined	-1.01797	<0.001	0.00203	0.363	|	-0.0269404	0.0188	0.0192	0.97	|	0	47	0	0	2	0	2	29	0.0689655	0	6	0	0	43	0	0	1	0	0	73	0	0	16	0	0
chr12	54672255	-	T	chr12:54672255	Eapp	SINE	UTR	3_prime_UTR_variant	0	0	-	-	-	-	-2.19236	0.016	0.073	0.435	|	-1.51263	0.00811	0.0231	0.309	|	4	43	0.0930233	0	5	0	3	16	0.1875	0	6	0	5	28	0.178571	1	2	0.5	8	41	0.195122	2	15	0.133333	0
chr12	54672261	-	T	chr12:54672261	Eapp	SINE	UTR	3_prime_UTR_variant	0	0	54672020	241	downstream	UTR	-6.33975	<0.001	0.081	0.00415	|	-1.90848	0.005	0.0188	0.232	|	9	42	0.214286	0	5	0	4	19	0.210526	0	5	0	7	30	0.233333	0	2	0	7	45	0.155556	0	17	0	0
chr12	54672262	-	T	chr12:54672262	Eapp	SINE	UTR	3_prime_UTR_variant	0	0	54672019	243	downstream	UTR	-5.40465	0.00561	0.238	0.0298	|	-1.24272	0.0158	0.0374	0.344	|	13	42	0.309524	0	5	0	3	19	0.157895	0	6	0	4	28	0.142857	1	2	0.5	9	45	0.2	1	16	0.0625	5
chr12	54672285	-	T	chr12:54672285	Eapp	SINE	UTR	3_prime_UTR_variant	1	1	54671997	288	downstream	UTR	-3.31629	0.0532	0.529	0.137	|	0.0505075	0.347	0.335	0.865	|	20	38	0.526316	0	4	0	18	37	0.486486	0	6	0	16	40	0.4	1	1	1	26	48	0.541667	2	19	0.105263	12
chr12	54672286	-	T	chr12:54672286	Eapp	SINE	UTR	3_prime_UTR_variant	0	0	54671996	290	downstream	UTR	-3.46236	0.00217	0.024	0.0461	|	-2.07967	0.00639	0.027	0.0925	|	1	42	0.0238095	0	4	0	2	40	0.05	0	6	0	6	43	0.139535	0	1	0	3	55	0.0545455	2	19	0.105263	0
chr12	54672307	-	T	chr12:54672307	Eapp	SINE	UTR	3_prime_UTR_variant	0	0	54671976	331	downstream	UTR	0.954653	0.00316	0.00163	0.642	|	1.02907	0.0174	0.00853	0.518	|	0	32	0	0	3	0	0	42	0	0	7	0	1	53	0.0188679	0	3	0	0	59	0	0	16	0	0
chr12	54672320	-	T	chr12:54672320	Eapp	SINE	UTR	3_prime_UTR_variant	0	0	54671961	359	downstream	UTR	-6.27675	0.00229	0.177	0.00311	|	-1.62908	0.0147	0.0456	0.122	|	4	35	0.114286	0	2	0	8	38	0.210526	1	7	0.142857	9	54	0.166667	0	4	0	15	59	0.254237	0	17	0	5
chr12	54672329	-	T	chr12:54672329	Eapp	SINE	UTR	3_prime_UTR_variant	0	0	54671953	376	downstream	UTR	-3.52243	<0.001	0.0115	0.0334	|	1.06496	0.00562	0.00269	0.608	|	0	44	0	0	1	0	0	44	0	0	7	0	2	55	0.0363636	0	5	0	2	60	0.0333333	0	17	0	10
chr12	54672348	-	T	chr12:54672348	Eapp	SINE	UTR	3_prime_UTR_variant	0	0	54671934	414	downstream	UTR	-6.28369	<0.001	0.0779	0.000172	|	-0.433739	0.00669	0.00904	0.696	|	5	48	0.104167	0	1	0	9	44	0.204545	0	5	0	1	54	0.0185185	0	5	0	9	62	0.145161	0	17	0	13
chr12	54672351	-	T	chr12:54672351	Eapp	SINE	UTR	3_prime_UTR_variant	0	0	54671932	419	downstream	UTR	-4.07903	0.00271	0.0459	0.0546	|	-0.0991221	0.0149	0.016	0.925	|	6	46	0.130435	0	1	0	5	49	0.102041	2	5	0.4	3	55	0.0545455	0	5	0	6	63	0.0952381	0	17	0	0
chr12	54672357	-	T	chr12:54672357	Eapp	SINE	UTR	3_prime_UTR_variant	1	1	54671925	432	downstream	UTR	-3.01258	0.0414	0.334	0.157	|	0.420571	0.122	0.0909	0.425	|	15	43	0.348837	0	2	0	17	49	0.346939	2	5	0.4	12	58	0.206897	2	5	0.4	31	66	0.469697	0	11	0	33
chr12	54672358	-	T	chr12:54672358	Eapp	SINE	UTR	3_prime_UTR_variant	0	0	54671925	433	downstream	UTR	-2.56136	0.0153	0.0901	0.258	|	1.01216	0.0268	0.0133	0.379	|	8	43	0.186047	0	2	0	10	49	0.204082	2	5	0.4	4	61	0.0655738	0	6	0	11	64	0.171875	0	13	0	3
chr12	54672398	-	T	chr12:54672398	Eapp	SINE	UTR	3_prime_UTR_variant	0	0	54671888	510	downstream	UTR	-2.96928	0.00257	0.0201	0.13	|	0.771452	0.00171	<0.001	0.374	|	2	57	0.0350877	0	5	0	1	50	0.02	2	7	0.285714	4	76	0.0526316	0	6	0	2	82	0.0243902	0	28	0	0
chr12	54672412	-	T	chr12:54672412	Eapp	SINE	UTR	3_prime_UTR_variant	0	0	54671873	539	downstream	UTR	-2.26849	<0.001	0.00482	0.0765	|	0	<0.001	<0.001	---	|	1	57	0.0175439	0	5	0	0	40	0	0	5	0	0	66	0	0	7	0	2	79	0.0253165	0	30	0	0
chr12	54672416	-	T	chr12:54672416	Eapp	SINE	UTR	3_prime_UTR_variant	0	0	54671864	552	downstream	UTR	-3.57701	0.00548	0.0654	0.0691	|	0.448374	0.00916	0.00671	0.718	|	5	56	0.0892857	1	5	0.2	3	44	0.0681818	0	5	0	3	63	0.047619	0	7	0	4	78	0.0512821	5	37	0.135135	10
chr12	54749939	-	T	chr12:54749939	Snx6	SINE	Intron	intron_variant	1	1	54749566	373	downstream	Intron	0	<0.001	<0.001	---	|	-0.155522	0.00278	0.0031	0.953	|	0	30	0	0	13	0	0	25	0	0	6	0	0	22	0	0	23	0	0	13	0	0	2	0	0
chr12	54749983	-	T	chr12:54749983	Snx6	SINE	Intron	intron_variant	1	1	54747966	2017	downstream	intronic	2.6182	0.00614	<0.001	0.177	|	4.34377	0.182	0.00894	0.0788	|	0	29	0	0	10	0	0	30	0	0	4	0	0	24	0	3	21	0.142857	0	11	0	0	11	0	0
chr12	55282929	-	T	chr12:55282929	AC166323.1,Ppp2r3c	.	Exon	synonymous_variant	0	0	-	-	-	-	-0.695391	0.00192	0.00311	0.402	|	0.7472	0.00214	0.00127	0.453	|	0	114	0	0	127	0	0	112	0	0	110	0	2	150	0.0133333	0	118	0	4	232	0.0172414	4	80	0.05	0
chr12	59028108	+	A	chr12:59028108	Gemin2	SINE	UTR	3_prime_UTR_variant	0	0	59030251	2143	downstream	undefined	0	<0.001	<0.001	---	|	3.45958	0.184	0.0167	0.0258	|	0	29	0	0	1	0	0	24	0	0	1	0	0	31	0	0	3	0	0	91	0	0	12	0	0
chr12	59201603	-	T	chr12:59201603	Fbxo33	.	UTR	3_prime_UTR_variant	0	0	-	-	-	-	-0.853669	0.00389	0.00703	0.556	|	0.516722	0.00408	0.00285	0.723	|	2	210	0.00952381	3	274	0.0109489	0	220	0	5	230	0.0217391	6	207	0.0289855	5	343	0.0145773	3	149	0.0201342	0	159	0	0
chr12	69197328	+	A	chr12:69197328	9330151L19Rik,AC099934.3,AC099934.7,Dnaaf2,Pole2	.	Exon	missense_variant	0	0	-	-	-	-	-2.17078	<0.001	0.0045	0.175	|	2.03592	0.232	0.0566	0.168	|	2	24	0.0833333	0	4	0	0	17	0	0	8	0	3	30	0.1	0	9	0	0	5	0	0	0	---	0
chr12	69301220	+	A	chr12:69301220	Klhdc2	SINE	Intron	non_coding_transcript_variant	1	1	69300405	815	upstream	intronic	1.08439	0.00212	<0.001	0.363	|	3.55804	0.0266	0.00226	0.0931	|	0	6	0	0	10	0	0	7	0	1	11	0.0909091	0	4	0	0	6	0	0	2	0	0	6	0	0
chr12	69308624	+	A	chr12:69308624	Klhdc2,Nemf	SINE	Intron	non_coding_transcript_exon_variant	0	0	69308423	201	upstream	intronic	0	<0.001	<0.001	---	|	4.4593	0.146	0.00665	0.0702	|	0	2	0	0	9	0	0	0	---	0	1	0	0	2	0	0	2	0	0	8	0	0	0	---	0
chr12	69308625	+	A	chr12:69308625	Klhdc2,Nemf	SINE	Intron	non_coding_transcript_exon_variant	1	1	69308420	205	upstream	intronic	1.66096	0.00316	<0.001	0.363	|	3.5234	0.0754	0.00656	0.144	|	0	2	0	0	9	0	0	0	---	0	1	0	0	2	0	0	2	0	0	8	0	0	0	---	0
chr12	69311210	+	A	chr12:69311210	Klhdc2,Nemf	SINE	UTR	3_prime_UTR_variant	0	0	69311355	145	downstream	UTR	-3.98123	<0.001	0.0158	0.0289	|	0.732836	0.0141	0.00851	0.153	|	2	34	0.0588235	0	1	0	0	19	0	0	3	0	1	46	0.0217391	0	10	0	0	87	0	0	93	0	8
chr12	69745709	-	T	chr12:69745709	Atp5s,Cdkl1	SINE	intergenic	downstream_gene_variant	0	0	-	-	-	-	3.28171	0.0181	0.00187	0.0644	|	0	<0.001	<0.001	---	|	0	49	0	1	23	0.0434783	4	95	0.0421053	2	30	0.0666667	0	84	0	0	20	0	0	65	0	0	42	0	0
chr12	69746080	-	T	chr12:69746080	Atp5s,Cdkl1	LTR	intergenic	downstream_gene_variant	0	0	-	-	-	-	1.04	0.0651	0.0317	0.663	|	0	<0.001	<0.001	---	|	1	33	0.030303	0	11	0	8	54	0.148148	3	33	0.0909091	4	65	0.0615385	2	14	0.142857	0	28	0	12	28	0.428571	---
chr12	70962030	+	A	chr12:70962030	Actr10	.	Exon	synonymous_variant	1	1	-	-	-	-	0	<0.001	<0.001	---	|	-0.0924676	0.000954	0.00102	0.221	|	0	252	0	0	71	0	0	240	0	0	81	0	0	281	0	0	80	0	0	431	0	0	323	0	0
chr12	70988256	+	A	chr12:70988256	3110056K07Rik,Psma3	SINE	Intron	non_coding_transcript_variant	1	1	-	-	-	-	3.13147	0.00876	<0.001	0.0758	|	0.646389	0.756	0.483	0.264	|	0	16	0	2	32	0.0625	0	9	0	2	23	0.0869565	0	5	0	0	31	0	0	16	0	0	6	0	0
chr12	70994601	+	A	chr12:70994601	3110056K07Rik,Psma3	SINE	UTR	3_prime_UTR_variant	1	1	70993840	761	upstream	intronic	-5.2702	0.00184	0.0709	0.0114	|	0.384025	0.111	0.0853	0.286	|	1	22	0.0454545	0	21	0	4	16	0.25	1	26	0.0384615	9	23	0.391304	0	14	0	5	28	0.178571	0	14	0	0
chr12	70994620	+	A	chr12:70994620	3110056K07Rik,Psma3	SINE	UTR	3_prime_UTR_variant	0	0	70993815	805	upstream	intronic	-1.09179	<0.001	0.00213	0.363	|	0.165228	0.0385	0.0343	0.8	|	0	18	0	0	24	0	0	20	0	0	29	0	0	26	0	0	14	0	3	32	0.09375	0	8	0	0
chr12	70994629	+	A	chr12:70994629	3110056K07Rik,Psma3	SINE	UTR	3_prime_UTR_variant	1	1	70993807	822	upstream	intronic	-1.94944	0.145	0.558	0.273	|	0.140714	0.829	0.752	0.0506	|	13	18	0.722222	5	21	0.238095	12	21	0.571429	4	28	0.142857	17	29	0.586207	0	14	0	20	28	0.714286	2	7	0.285714	3
chr12	70994636	+	A	chr12:70994636	3110056K07Rik,Psma3	SINE	UTR	3_prime_UTR_variant	1	1	70993800	836	upstream	intronic	-0.886988	<0.001	0.00185	0.363	|	1.18054	0.0198	0.00872	0.468	|	0	20	0	0	21	0	0	22	0	0	24	0	0	30	0	0	14	0	1	25	0.04	0	7	0	0
chr12	70995113	+	A	chr12:70995113	3110056K07Rik,Psma3	SINE	UTR	3_prime_UTR_variant	0	0	70997449	2336	downstream	Intron	0	<0.001	<0.001	---	|	0.722075	0.0372	0.0226	0.0871	|	0	11	0	0	3	0	0	8	0	0	1	0	0	15	0	0	3	0	0	19	0	0	4	0	0
chr12	70995129	+	A	chr12:70995129	3110056K07Rik,Psma3	SINE	UTR	3_prime_UTR_variant	1	1	-	-	-	-	-3.6926	0.008	0.103	0.264	|	0.559725	0.557	0.378	0.00147	|	3	13	0.230769	0	3	0	2	9	0.222222	0	2	0	9	18	0.5	0	5	0	3	21	0.142857	0	6	0	1
chr12	70995132	+	A	chr12:70995132	3110056K07Rik,Psma3	SINE	UTR	3_prime_UTR_variant	1	1	-	-	-	-	-2.17687	<0.001	0.00452	0.175	|	0.0232156	0.0262	0.0257	0.961	|	1	13	0.0769231	0	3	0	1	9	0.111111	0	2	0	0	18	0	0	5	0	0	21	0	0	8	0	0
chr12	70995135	+	A	chr12:70995135	3110056K07Rik,Psma3	SINE	UTR	3_prime_UTR_variant	1	1	-	-	-	-	-0.166667	0.00251	0.00282	0.942	|	0.787324	0.0753	0.0437	0.212	|	0	13	0	0	3	0	0	9	0	0	2	0	0	18	0	0	5	0	0	21	0	2	8	0.25	2
chr12	70995158	+	A	chr12:70995158	3110056K07Rik,Psma3	SINE	UTR	3_prime_UTR_variant	1	1	70997389	2231	downstream	intronic	-2.3837	<0.001	0.00522	0.175	|	1.45933	0.00402	0.00146	0.15	|	2	18	0.111111	0	4	0	0	13	0	0	5	0	4	22	0.181818	0	9	0	0	20	0	0	19	0	0
chr12	70995171	+	A	chr12:70995171	3110056K07Rik,Psma3	SINE	UTR	3_prime_UTR_variant	1	1	-	-	-	-	-2.33018	0.00267	0.0134	0.416	|	0.444222	0.143	0.105	0.126	|	4	23	0.173913	0	6	0	4	20	0.2	0	10	0	0	27	0	0	11	0	4	24	0.166667	0	26	0	0
chr12	70995180	+	A	chr12:70995180	3110056K07Rik,Psma3	SINE	UTR	3_prime_UTR_variant	1	1	-	-	-	-	-5.79807	0.00258	0.143	0.00771	|	0.667092	0.13	0.0818	0.00972	|	6	31	0.193548	0	8	0	4	22	0.181818	0	11	0	4	33	0.121212	0	13	0	7	30	0.233333	0	38	0	4
chr12	70995210	+	A	chr12:70995210	3110056K07Rik,Psma3	SINE	UTR	regulatory_region_variant	0	0	70994607	603	upstream	UTR	-3.99617	0.045	0.718	0.0739	|	0.125653	0.514	0.471	0.329	|	26	41	0.634146	0	11	0	17	22	0.772727	0	12	0	25	31	0.806452	9	22	0.409091	36	41	0.878049	7	64	0.109375	19
chr12	70995211	+	A	chr12:70995211	3110056K07Rik,Psma3	SINE	UTR	regulatory_region_variant	1	1	70994607	604	upstream	UTR	-5.85822	0.00493	0.286	0.0166	|	-0.36421	0.106	0.136	0.118	|	13	41	0.317073	0	10	0	10	22	0.454545	0	12	0	15	31	0.483871	0	22	0	11	41	0.268293	2	64	0.03125	8
chr12	70995214	+	A	chr12:70995214	3110056K07Rik,Psma3	SINE	UTR	regulatory_region_variant	1	1	70994605	609	upstream	UTR	-3.3032	0.0251	0.248	0.0851	|	-0.181489	0.188	0.214	0.421	|	6	44	0.136364	0	10	0	9	22	0.409091	0	12	0	5	33	0.151515	2	24	0.0833333	11	38	0.289474	6	63	0.0952381	11
chr12	71006577	-	T	chr12:71006577	3110056K07Rik	SINE	Intron	non_coding_transcript_variant	0	0	71007769	1192	upstream	intronic	-2.15129	0.00209	0.0093	0.226	|	0	<0.001	<0.001	---	|	0	18	0	0	15	0	3	18	0.166667	0	17	0	0	8	0	0	13	0	2	165	0.0121212	9	107	0.0841121	1
chr12	71006586	-	T	chr12:71006586	3110056K07Rik	SINE	Intron	non_coding_transcript_variant	0	0	71007761	1175	upstream	intronic	-2.22739	0.00657	0.0308	0.329	|	2.55887	0.00589	<0.001	0.181	|	1	20	0.05	0	18	0	3	20	0.15	0	19	0	0	12	0	1	14	0.0714286	4	158	0.0253165	3	111	0.027027	8
chr12	71006603	-	T	chr12:71006603	3110056K07Rik	SINE	Intron	non_coding_transcript_variant	1	1	71007743	1140	upstream	intronic	-3.02324	0.00635	0.0516	0.0804	|	0.260902	0.0378	0.0315	0.901	|	2	41	0.0487805	0	26	0	4	23	0.173913	0	23	0	1	34	0.0294118	0	28	0	5	180	0.0277778	2	120	0.0166667	6
chr12	71006616	-	T	chr12:71006616	3110056K07Rik	SINE	Intron	non_coding_transcript_variant	0	0	-	-	-	-	-0.463274	0.00644	0.00888	0.801	|	2.70376	0.0145	0.00223	0.11	|	2	66	0.030303	0	35	0	1	36	0.0277778	0	38	0	0	50	0	0	45	0	4	148	0.027027	4	117	0.034188	3
chr12	71098211	+	A	chr12:71098211	Arid4a	.	UTR	3_prime_UTR_variant	0	0	-	-	-	-	-6.25035	0.00139	0.106	3.95e-05	|	-0.174345	0.00418	0.00471	0.946	|	15	162	0.0925926	0	76	0	14	121	0.115702	0	55	0	25	139	0.179856	0	84	0	22	170	0.129412	1	137	0.00729927	4
chr12	73352812	+	A	chr12:73352812	AC159813.1,Slc38a6	SINE	UTR	3_prime_UTR_variant	0	0	73353218	406	downstream	UTR	3.89793	0.0149	<0.001	0.5	|	-2.62726	0.00918	0.0567	0.12	|	0	30	0	---	---	---	1	30	0.0333333	---	---	---	0	40	0	---	---	---	0	60	0	0	9	0	0
chr12	73946380	+	A	chr12:73946380	AC124712.1,Gm15283,Hif1a	.	UTR	regulatory_region_variant	0	0	-	-	-	-	-2.69523	<0.001	0.00648	0.0343	|	-0.511839	0.00159	0.00227	0.506	|	27	890	0.0303371	0	477	0	2	415	0.00481928	0	336	0	22	935	0.0235294	0	553	0	18	839	0.0214541	0	414	0	0
chr12	73946412	+	A	chr12:73946412	AC124712.1,Gm15283,Hif1a	.	UTR	regulatory_region_variant	0	0	-	-	-	-	-2.4026	0.00309	0.0163	0.0107	|	-0.548265	0.00317	0.00463	0.722	|	29	992	0.0292339	1	521	0.00191939	13	506	0.0256917	1	352	0.00284091	29	1070	0.0271028	6	590	0.0101695	26	889	0.0292463	6	385	0.0155844	1
chr12	73946423	+	A	chr12:73946423	AC124712.1,Gm15283,Hif1a	.	UTR	regulatory_region_variant	0	0	73947511	1088	downstream	UTR	-3.29781	0.00532	0.0523	0.00103	|	-0.353523	0.00642	0.00821	0.545	|	79	936	0.0844017	2	464	0.00431034	26	465	0.055914	2	311	0.00643087	57	955	0.0596859	4	526	0.00760456	44	905	0.0486188	6	396	0.0151515	18
chr12	73946427	+	A	chr12:73946427	AC124712.1,Gm15283,Hif1a	.	UTR	regulatory_region_variant	0	0	73947502	1075	downstream	UTR	-4.0719	0.00147	0.0247	0.00148	|	-0.394809	0.0026	0.00342	0.623	|	28	908	0.030837	0	452	0	12	467	0.0256959	0	306	0	21	925	0.0227027	0	529	0	17	913	0.0186199	4	396	0.010101	18
chr12	73947505	+	A	chr12:73947505	AC124712.1,Gm15283,Hif1a	.	UTR	3_prime_UTR_variant	0	0	-	-	-	-	-4.91778	0.00242	0.0731	0.0282	|	-0.914693	<0.001	0.00189	0.374	|	1	13	0.0769231	0	6	0	0	6	0	0	11	0	3	16	0.1875	2	10	0.2	12	32	0.375	0	30	0	11
chr12	76331338	+	A	chr12:76331338	Akap5	SINE	UTR	3_prime_UTR_variant	0	0	-	-	-	-	0	<0.001	<0.001	---	|	-1.68624	0.00587	0.0189	0.522	|	0	1	0	0	4	0	0	1	0	0	0	---	0	2	0	0	3	0	---	---	---	0	3	0	---
chr12	76347060	-	T	chr12:76347060	AC124453.1,Zbtb25	SINE	intergenic	downstream_gene_variant	1	1	76345821	1239	downstream	undefined	0	<0.001	<0.001	---	|	0.40075	0.0091	0.0069	0.911	|	0	7	0	---	---	---	0	3	0	0	0	---	0	8	0	---	---	---	0	6	0	0	4	0	---
chr12	76347074	-	T	chr12:76347074	AC124453.1,Zbtb25	SINE	intergenic	downstream_gene_variant	1	1	76345806	1268	downstream	undefined	0	<0.001	<0.001	---	|	0.483007	0.00278	0.00199	0.819	|	0	5	0	---	---	---	0	1	0	0	0	---	0	7	0	---	---	---	0	8	0	0	5	0	---
chr12	76347079	-	T	chr12:76347079	AC124453.1,Zbtb25	SINE	intergenic	downstream_gene_variant	1	1	76345803	1276	downstream	undefined	-2.65526	<0.001	0.0063	0.423	|	3.93588	0.109	0.00711	0.268	|	0	4	0	---	---	---	0	2	0	0	0	---	0	8	0	---	---	---	2	8	0.25	0	5	0	---
chr12	78838254	-	T	chr12:78838254	Atp6v1d,Mpp5	SINE	UTR	3_prime_UTR_variant	0	0	78836792	1462	downstream	intronic	0	<0.001	<0.001	---	|	2.42356	0.00536	<0.001	0.182	|	0	58	0	0	42	0	0	32	0	0	46	0	0	48	0	0	54	0	0	14	0	0	2	0	0
chr12	78838305	-	T	chr12:78838305	Atp6v1d,Mpp5	SINE	UTR	3_prime_UTR_variant	0	0	-	-	-	-	0	<0.001	<0.001	---	|	-0.951266	<0.001	0.00193	0.374	|	0	79	0	0	63	0	0	38	0	0	67	0	0	67	0	0	64	0	0	24	0	0	8	0	0
chr12	78838319	-	T	chr12:78838319	Atp6v1d,Mpp5	SINE	UTR	3_prime_UTR_variant	0	0	78836730	1589	downstream	intronic	0	<0.001	<0.001	---	|	-0.748543	0.00546	0.00917	0.61	|	0	79	0	0	66	0	0	42	0	0	67	0	0	68	0	0	62	0	0	27	0	0	10	0	0
chr12	79082146	-	T	chr12:79082146	Pigh,Plekhh1	SINE	UTR	3_prime_UTR_variant	0	0	-	-	-	-	0	<0.001	<0.001	---	|	-1.28824	0.0157	0.0383	0.404	|	0	48	0	0	0	---	0	42	0	---	---	---	0	45	0	0	1	0	0	28	0	0	1	0	0
chr12	79154497	-	T	chr12:79154497	AC154585.1,Arg2,Vti1b	SINE	Intron	intron_variant	1	1	-	-	-	-	-0.97972	<0.001	0.00197	0.363	|	4.82366	0.0283	<0.001	0.0184	|	0	25	0	0	147	0	1	17	0.0588235	0	112	0	0	26	0	0	91	0	0	9	0	0	0	---	0
chr12	79155405	-	T	chr12:79155405	AC154585.1,Arg2,Vti1b	SINE	Intron	intron_variant	0	0	79153857	1548	downstream	intronic	0	<0.001	<0.001	---	|	1.96461	0.0227	0.00582	0.303	|	0	16	0	0	79	0	0	8	0	0	39	0	0	21	0	0	39	0	0	14	0	0	10	0	0
chr12	79155436	-	T	chr12:79155436	AC154585.1,Arg2,Vti1b	SINE	Intron	intron_variant	0	0	79153826	1610	downstream	intronic	-1.30838	<0.001	0.00248	0.363	|	0.838319	0.00914	0.00511	0.51	|	0	26	0	0	106	0	0	12	0	0	62	0	0	22	0	0	73	0	3	13	0.230769	0	19	0	0
chr12	79155438	-	T	chr12:79155438	AC154585.1,Arg2,Vti1b	SINE	Intron	intron_variant	0	0	79153824	1614	downstream	intronic	-1.30838	<0.001	0.00248	0.363	|	-0.535856	0.0101	0.0146	0.823	|	0	26	0	0	105	0	0	12	0	0	62	0	0	23	0	0	75	0	3	13	0.230769	0	19	0	0
chr12	79155453	-	T	chr12:79155453	AC154585.1,Arg2,Vti1b	SINE	Intron	intron_variant	0	0	79153809	1644	downstream	intronic	-1.4943	<0.001	0.00282	0.363	|	1.87234	0.00366	<0.001	0.178	|	0	25	0	0	105	0	0	15	0	0	66	0	0	22	0	0	79	0	3	6	0.5	0	22	0	0
chr12	79155454	-	T	chr12:79155454	AC154585.1,Arg2,Vti1b	SINE	Intron	intron_variant	1	1	79153808	1646	downstream	intronic	-1.4943	<0.001	0.00282	0.363	|	-0.335387	0.036	0.0455	0.284	|	0	25	0	0	106	0	0	15	0	0	68	0	0	22	0	0	80	0	3	6	0.5	0	22	0	0
chr12	79162187	-	T	chr12:79162187	Gm17195,Vti1b	SINE	Intron	3_prime_UTR_variant	0	0	-	-	-	-	0	<0.001	<0.001	---	|	-3.09682	0.00611	0.0523	0.159	|	0	65	0	0	15	0	0	22	0	0	9	0	0	32	0	0	17	0	0	27	0	0	7	0	0
chr12	80491898	+	A	chr12:80491898	Exd2	SINE	Intron	non_coding_transcript_exon_variant	0	0	80493128	1230	downstream	intronic	0	<0.001	<0.001	---	|	-1.26254	0.00209	0.00502	0.58	|	0	10	0	0	3	0	0	2	0	---	---	---	0	5	0	0	0	---	0	13	0	---	---	---	0
chr12	80491929	+	A	chr12:80491929	Exd2	SINE	Intron	non_coding_transcript_exon_variant	0	0	80493093	1164	downstream	intronic	0	<0.001	<0.001	---	|	-0.921646	0.00278	0.00527	0.566	|	0	8	0	0	4	0	0	3	0	---	---	---	0	4	0	0	0	---	0	11	0	---	---	---	0
chr12	80634758	-	T	chr12:80634758	AC134537.3,Erh,Galnt16	SINE	Intron	intron_variant	1	1	-	-	-	-	1.0264	0.00204	<0.001	0.363	|	0	<0.001	<0.001	---	|	0	8	0	0	30	0	0	10	0	1	14	0.0714286	0	7	0	0	26	0	0	0	---	0	11	0	0
chr12	80635826	-	T	chr12:80635826	AC134537.3,Erh,Galnt16	SINE	Exon	missense_variant	0	0	-	-	-	-	0	<0.001	<0.001	---	|	1.55037	0.151	0.0514	0.21	|	0	7	0	0	27	0	0	7	0	0	4	0	0	2	0	0	15	0	0	5	0	0	0	---	0
chr12	80639048	-	T	chr12:80639048	AC134537.3,Erh,Slc39a9	SINE	Intron	non_coding_transcript_variant	0	0	-	-	-	-	0.820232	0.00177	<0.001	0.363	|	5.76377	0.139	0.00257	0.0135	|	0	9	0	1	33	0.030303	0	3	0	0	38	0	0	7	0	0	29	0	0	7	0	0	1	0	0
chr12	80723749	+	A	chr12:80723749	Plekhd1	SINE	UTR	3_prime_UTR_variant	1	1	80722714	1035	upstream	UTR	---	---	---	---	|	1.2631	0.66	0.275	0.0622	|	0	0	---	---	---	---	---	---	---	---	---	---	---	---	---	0	0	---	---	---	---	---	---	---	---
chr12	80723752	+	A	chr12:80723752	Plekhd1	SINE	UTR	3_prime_UTR_variant	1	1	80722711	1041	upstream	UTR	---	---	---	---	|	-4.93881	0.00615	0.189	0.036	|	0	0	---	---	---	---	---	---	---	---	---	---	---	---	---	0	0	---	---	---	---	---	---	---	---
chr12	80723763	+	A	chr12:80723763	Plekhd1	SINE	UTR	3_prime_UTR_variant	1	1	80722700	1063	upstream	UTR	---	---	---	---	|	-0.9673	0.0082	0.016	0.725	|	0	0	---	---	---	---	---	---	---	---	---	---	---	---	---	0	0	---	---	---	---	---	---	---	---
chr12	80723768	+	A	chr12:80723768	Plekhd1	SINE	UTR	3_prime_UTR_variant	0	0	80722697	1071	upstream	UTR	---	---	---	---	|	-2.49443	<0.001	0.00564	0.182	|	0	0	---	---	---	---	---	---	---	---	---	---	---	---	---	0	0	---	---	---	---	---	---	---	---
chr12	80723769	+	A	chr12:80723769	Plekhd1	SINE	UTR	3_prime_UTR_variant	1	1	80722697	1072	upstream	UTR	---	---	---	---	|	-2.91433	0.00258	0.0194	0.357	|	0	0	---	---	---	---	---	---	---	---	---	---	---	---	---	0	0	---	---	---	---	---	---	---	---
chr12	80723797	+	A	chr12:80723797	Plekhd1	SINE	UTR	3_prime_UTR_variant	1	1	-	-	-	-	---	---	---	---	|	-0.305134	0.146	0.181	0.892	|	0	0	---	---	---	---	---	---	---	---	---	---	---	---	---	0	0	---	---	---	---	---	---	---	---
chr12	80723807	+	A	chr12:80723807	Plekhd1	SINE	UTR	3_prime_UTR_variant	1	1	-	-	-	-	---	---	---	---	|	3.42682	0.0829	0.00771	0.358	|	0	0	---	---	---	---	---	---	---	---	---	---	---	---	---	0	0	---	---	---	---	---	---	---	---
chr12	80723809	+	A	chr12:80723809	Plekhd1	SINE	UTR	3_prime_UTR_variant	1	1	-	-	-	-	---	---	---	---	|	0.289492	0.00283	0.00232	0.899	|	0	0	---	---	---	---	---	---	---	---	---	---	---	---	---	0	0	---	---	---	---	---	---	---	---
chr12	81717428	-	T	chr12:81717428	AC125351.1,Map3k9	.	intergenic	downstream_gene_variant	0	0	-	-	-	-	-2.39946	<0.001	0.00528	0.0815	|	0.555925	0.00933	0.00634	0.566	|	1	76	0.0131579	0	40	0	3	61	0.0491803	0	28	0	2	60	0.0333333	0	26	0	0	13	0	0	9	0	0
chr12	83815432	-	T	chr12:83815432	Numb	SINE	Intron	NMD_transcript_variant	0	0	83814733	699	downstream	intronic	2.66358	0.00634	<0.001	0.0761	|	3.98631	0.0158	<0.001	0.178	|	0	9	0	5	105	0.047619	0	6	0	1	32	0.03125	0	6	0	2	46	0.0434783	0	5	0	0	9	0	0
chr12	83950392	-	T	chr12:83950392	Gm26571,Heatr4,Riox1	SINE	Exon	regulatory_region_variant	0	0	-	-	-	-	-0.501931	<0.001	0.00142	0.363	|	1.91015	0.0478	0.0127	0.696	|	0	115	0	0	116	0	0	106	0	0	59	0	1	124	0.00806452	0	121	0	0	37	0	0	30	0	0
chr12	84140716	+	A	chr12:84140716	Dnal1	SINE	UTR	3_prime_UTR_variant	0	0	-	-	-	-	0	0.01	0.01	1	|	1.29373	0.113	0.0462	0.337	|	0	1	0	---	---	---	---	---	---	0	0	---	0	1	0	---	---	---	0	3	0	0	3	0	3
chr12	84140726	+	A	chr12:84140726	Dnal1	SINE	UTR	3_prime_UTR_variant	1	1	84143021	2295	downstream	UTR	0	<0.001	<0.001	---	|	1.50085	0.00636	0.00225	0.34	|	0	1	0	---	---	---	---	---	---	0	0	---	0	1	0	---	---	---	0	3	0	0	3	0	0
chr12	84142964	+	A	chr12:84142964	Dnal1,Pnma1	.	UTR	regulatory_region_variant	0	0	-	-	-	-	-1.72877	<0.001	0.00331	0.374	|	0.847951	0.011	0.00614	0.621	|	0	4	0	---	---	---	0	2	0	0	0	---	0	4	0	0	0	---	0	7	0	0	2	0	4
chr12	84143036	+	A	chr12:84143036	Dnal1,Pnma1	SINE	UTR	regulatory_region_variant	0	0	-	-	-	-	1.50127	0.00283	<0.001	0.374	|	0.779933	0.085	0.0495	0.214	|	0	2	0	---	---	---	0	3	0	0	0	---	0	5	0	0	0	---	0	11	0	2	11	0.181818	0
chr12	84143088	+	A	chr12:84143088	Dnal1,Pnma1	SINE	UTR	regulatory_region_variant	0	0	-	-	-	-	0	<0.001	<0.001	---	|	0.992649	0.00636	0.0032	0.407	|	0	2	0	---	---	---	0	3	0	0	0	---	0	4	0	0	0	---	0	25	0	0	17	0	0
chr12	84280047	-	T	chr12:84280047	-	SINE	intergenic	intergenic_variant	0	0	84278325	1722	downstream	intergenic	2.49145	0.00562	<0.001	0.391	|	3.21826	0.00931	<0.001	0.0757	|	0	3	0	1	1	1	0	2	0	0	2	0	0	0	---	0	4	0	0	0	---	0	14	0	0
chr12	84375011	-	T	chr12:84375011	Coq6,Entpd5	SINE	UTR	3_prime_UTR_variant	0	0	-	-	-	-	-1.44762	<0.001	0.00273	0.179	|	0.534632	0.0809	0.0558	0.526	|	1	69	0.0144928	0	31	0	1	96	0.0104167	0	22	0	0	113	0	0	27	0	0	96	0	0	9	0	0
chr12	84755694	-	T	chr12:84755694	Npc2	SINE	UTR	regulatory_region_variant	0	0	-	-	-	-	-1.09082	0.00489	0.0104	0.375	|	0.766148	0.0672	0.0395	0.49	|	3	169	0.0177515	1	85	0.0117647	1	132	0.00757576	3	53	0.0566038	4	171	0.0233918	0	63	0	2	74	0.027027	1	49	0.0204082	0
chr12	84762323	-	T	chr12:84762323	Npc2	SINE	Intron	regulatory_region_variant	0	0	84762041	282	downstream	intronic	1.98091	0.059	0.015	0.511	|	0.6	0.863	0.57	0.245	|	0	18	0	9	23	0.391304	4	14	0.285714	7	20	0.35	1	17	0.0588235	13	28	0.464286	0	4	0	0	3	0	4
chr12	84762335	-	T	chr12:84762335	Npc2	SINE	Intron	regulatory_region_variant	0	0	84762028	307	downstream	intronic	1.43976	0.0161	0.00595	0.608	|	2.89631	0.628	0.0844	0.165	|	0	21	0	5	20	0.25	0	13	0	5	19	0.263158	1	15	0.0666667	7	26	0.269231	0	5	0	0	3	0	4
chr12	84972419	+	A	chr12:84972419	Arel1,Fcf1	SINE	Intron	intron_variant	1	1	-	-	-	-	3.76624	0.138	0.0101	0.0756	|	2.30275	0.547	0.111	0.275	|	1	28	0.0357143	9	28	0.321429	0	12	0	5	24	0.208333	4	22	0.181818	5	15	0.333333	2	12	0.166667	4	13	0.307692	0
chr12	84972426	+	A	chr12:84972426	Arel1,Fcf1	SINE	Intron	intron_variant	1	1	-	-	-	-	1.21714	0.00232	<0.001	0.363	|	0	<0.001	<0.001	---	|	0	31	0	0	30	0	0	13	0	0	23	0	0	22	0	3	19	0.157895	0	19	0	0	12	0	0
chr12	85234649	-	T	chr12:85234649	Mlh3	SINE	UTR	3_prime_UTR_variant	0	0	85235102	453	upstream	UTR	-7.94133	<0.001	0.246	0.0313	|	-3.6655	0.00647	0.0821	0.104	|	3	16	0.1875	0	1	0	5	22	0.227273	---	---	---	3	17	0.176471	---	---	---	29	90	0.322222	0	2	0	16
chr12	85235104	-	T	chr12:85235104	Mlh3	SINE	UTR	3_prime_UTR_variant	1	1	85234647	457	downstream	UTR	-4.76572	0.01	0.272	0.271	|	-1.89805	0.0132	0.0493	0.266	|	0	10	0	---	---	---	9	25	0.36	1	1	1	10	26	0.384615	---	---	---	17	38	0.447368	0	1	0	1
chr12	85235112	-	T	chr12:85235112	Mlh3	SINE	UTR	3_prime_UTR_variant	1	1	85234639	473	downstream	UTR	-5.12908	<0.001	0.035	0.184	|	-1.25194	0.00263	0.00626	0.604	|	0	11	0	---	---	---	6	24	0.25	0	1	0	0	27	0	---	---	---	6	35	0.171429	0	1	0	0
chr12	87433871	-	T	chr12:87433871	Alkbh1,Gm29362,Mir3068	SINE	Intron	3_prime_UTR_variant	0	0	-	-	-	-	0	<0.001	<0.001	---	|	-0.139029	0.00197	0.00217	0.937	|	0	3	0	0	34	0	0	3	0	0	33	0	0	8	0	0	30	0	0	0	---	0	7	0	0
chr12	91823111	-	T	chr12:91823111	Sel1l	SINE	Intron	non_coding_transcript_variant	0	0	91822946	165	downstream	intronic	0	<0.001	<0.001	---	|	4.38949	0.129	0.00615	0.058	|	0	2	0	0	17	0	0	4	0	0	9	0	0	1	0	0	11	0	0	0	---	0	0	---	0
chr12	91823112	-	T	chr12:91823112	Sel1l	SINE	Intron	non_coding_transcript_variant	0	0	91822945	167	downstream	intronic	0	<0.001	<0.001	---	|	5.86702	0.0584	<0.001	0.0174	|	0	2	0	0	17	0	0	4	0	0	10	0	0	1	0	0	11	0	0	0	---	0	0	---	0
chr12	91823125	-	T	chr12:91823125	Sel1l	SINE	Intron	non_coding_transcript_variant	0	0	-	-	-	-	0	<0.001	<0.001	---	|	3.3276	0.241	0.024	0.121	|	0	2	0	0	16	0	0	4	0	0	10	0	0	4	0	0	11	0	0	0	---	0	0	---	0
chr12	100207186	+	A	chr12:100207186	Calm1,Gm26723	.	UTR	regulatory_region_variant	1	1	-	-	-	-	0.41111	0.0793	0.0596	0.0977	|	0.187163	0.0563	0.0495	0.00389	|	147	2166	0.067867	28	442	0.0633484	95	1779	0.0534008	42	406	0.103448	111	2459	0.0451403	61	635	0.096063	334	5167	0.064641	148	1814	0.0815877	301
chr12	100877388	-	T	chr12:100877388	9030617O03Rik,Gpr68	SINE	UTR	3_prime_UTR_variant	0	0	100874970	2418	downstream	undefined	1.46598	0.00276	<0.001	0.363	|	-0.261866	0.0457	0.0548	0.92	|	0	14	0	0	2	0	0	8	0	0	2	0	0	26	0	0	4	0	0	23	0	0	6	0	0
chr12	101919872	-	T	chr12:101919872	Atxn3,Gm20036	SINE	UTR	3_prime_UTR_variant	1	1	-	-	-	-	-2.10908	0.0109	0.0472	0.146	|	0.398243	0.225	0.171	0.146	|	12	132	0.0909091	1	13	0.0769231	15	87	0.172414	4	17	0.235294	26	138	0.188406	2	21	0.0952381	10	146	0.0684932	0	10	0	0
chr12	101921631	-	T	chr12:101921631	Atxn3	SINE	UTR	3_prime_UTR_variant	1	1	-	-	-	-	-2.24537	0.0177	0.0841	0.212	|	0.285353	0.279	0.229	0.104	|	31	128	0.242188	1	18	0.0555556	29	115	0.252174	5	14	0.357143	36	131	0.274809	3	34	0.0882353	15	27	0.555556	---	---	---	2
chr12	101921632	-	T	chr12:101921632	Atxn3	SINE	UTR	3_prime_UTR_variant	0	0	-	-	-	-	-3.6913	<0.001	0.0129	0.0707	|	2.96853	0.0822	0.0105	0.129	|	9	129	0.0697674	0	18	0	7	114	0.0614035	0	14	0	11	131	0.0839695	0	34	0	0	26	0	---	---	---	0
chr12	102486598	+	A	chr12:102486598	Golga5	SINE	Intron	intron_variant	1	1	102484915	1683	upstream	intronic	0.533606	0.00215	0.00149	0.708	|	0.814078	0.0086	0.00489	0.69	|	1	92	0.0108696	0	26	0	0	48	0	2	20	0.1	0	53	0	0	19	0	0	49	0	0	13	0	0
chr12	102486602	+	A	chr12:102486602	Golga5	SINE	Intron	intron_variant	0	0	102484911	1691	upstream	intronic	-0.560979	<0.001	0.00148	0.363	|	1.71745	0.00329	<0.001	0.374	|	1	97	0.0103093	0	28	0	0	47	0	0	20	0	0	54	0	0	17	0	0	48	0	0	13	0	0
chr12	102486603	+	A	chr12:102486603	Golga5	SINE	Intron	intron_variant	1	1	102484907	1696	upstream	intronic	0.546854	0.0036	0.00246	0.705	|	-0.00301535	0.0979	0.0981	0.999	|	1	97	0.0103093	1	27	0.037037	1	46	0.0217391	0	20	0	0	55	0	1	17	0.0588235	0	47	0	0	13	0	0
chr12	102741619	-	T	chr12:102741619	Gm20604,Gm28051,Moap1,Tmem251	SINE	Intron	intron_variant	0	0	-	-	-	-	0	<0.001	<0.001	---	|	2.34578	0.11	0.0217	0.185	|	0	4	0	0	3	0	0	4	0	0	0	---	0	2	0	0	2	0	0	2	0	---	---	---	---
chr12	102741642	-	T	chr12:102741642	Gm20604,Gm28051,Moap1,Tmem251	SINE	Intron	intron_variant	0	0	-	-	-	-	0	<0.001	<0.001	---	|	0.374407	0.208	0.161	0.489	|	0	1	0	0	2	0	0	1	0	0	0	---	0	3	0	0	1	0	0	2	0	---	---	---	---
chr12	109027765	+	A	chr12:109027765	Begain,Wdr25	SINE	UTR	3_prime_UTR_variant	1	1	-	-	-	-	1.2048	0.00231	<0.001	0.363	|	0.871147	0.262	0.143	0.287	|	0	11	0	0	2	0	0	22	0	0	8	0	0	16	0	0	8	0	0	24	0	0	19	0	0
chr12	109546744	+	A	chr12:109546744	Gm27300,Meg3,Mir1906-1	.	Intron	non_coding_transcript_variant	0	0	109547063	319	downstream	Intron	-3.63763	<0.001	0.0124	0.0804	|	0.660218	0.0462	0.0292	0.138	|	---	---	---	0	1	0	0	19	0	0	10	0	0	15	0	0	8	0	1	28	0.0357143	0	33	0	8
chr12	109547644	+	A	chr12:109547644	Gm27300,Meg3,Mir1906-1	.	Intron	non_coding_transcript_variant	1	1	-	-	-	-	0	<0.001	<0.001	---	|	0.0695429	0.0226	0.0216	0.886	|	---	---	---	---	---	---	0	17	0	0	3	0	0	11	0	0	10	0	0	12	0	0	48	0	0
chr12	109547961	+	A	chr12:109547961	Gm27300,Meg3,Mir1906-1	.	Intron	non_coding_transcript_variant	1	1	-	-	-	-	1.2878	0.00737	0.00302	0.672	|	0.542395	0.12	0.0824	0.0316	|	---	---	---	0	1	0	0	7	0	0	11	0	0	8	0	0	15	0	4	16	0.25	0	32	0	0
chr12	109559014	+	A	chr12:109559014	Meg3,Mir770	.	Exon	non_coding_transcript_exon_variant	0	0	-	-	-	-	2.36673	0.0149	0.00289	0.234	|	0.781745	0.0704	0.0409	0.0653	|	---	---	---	---	---	---	0	0	---	0	1	0	0	1	0	0	3	0	0	32	0	7	48	0.145833	7
chr12	109563691	+	A	chr12:109563691	Gm26906,Meg3,Mir770	.	Exon	non_coding_transcript_exon_variant	0	0	-	-	-	-	1.45478	0.00569	0.00207	0.547	|	0.0508566	0.0373	0.036	0.85	|	---	---	---	---	---	---	0	0	---	0	0	---	0	0	---	0	0	---	1	26	0.0384615	0	8	0	0
chr12	111649474	+	A	chr12:111649474	Mark3	SINE	Intron	non_coding_transcript_variant	1	1	-	-	-	-	-0.0438391	0.00204	0.0021	0.363	|	1.69535	0.403	0.124	0.369	|	0	37	0	0	23	0	0	12	0	0	9	0	3	35	0.0857143	1	14	0.0714286	0	16	0	0	0	---	0
chr12	111649489	+	A	chr12:111649489	Mark3	SINE	Intron	non_coding_transcript_variant	0	0	111648869	620	upstream	intronic	0.940643	0.00192	<0.001	0.363	|	1.98662	0.0198	0.00498	0.291	|	0	37	0	0	23	0	0	11	0	0	8	0	0	39	0	1	20	0.05	0	16	0	0	0	---	0
chr12	111651598	+	A	chr12:111651598	Mark3	SINE	Intron	non_coding_transcript_variant	1	1	-	-	-	-	0	<0.001	<0.001	---	|	-2.05473	0.0129	0.0537	0.387	|	0	20	0	0	21	0	0	50	0	0	18	0	0	43	0	0	28	0	0	31	0	0	18	0	0
chr12	111734069	+	A	chr12:111734069	Apopt1,Gm15996	SINE	UTR	3_prime_UTR_variant	0	0	111735620	1551	downstream	intronic	0	<0.001	<0.001	---	|	1.07652	0.0559	0.0265	0.251	|	0	44	0	0	7	0	0	55	0	0	10	0	0	65	0	0	18	0	0	182	0	0	11	0	0
chr12	111734070	+	A	chr12:111734070	Apopt1,Gm15996	SINE	UTR	3_prime_UTR_variant	0	0	111735619	1549	downstream	intronic	0.965977	0.00195	<0.001	0.363	|	0.749403	0.0383	0.0228	0.186	|	0	44	0	0	7	0	0	55	0	0	10	0	0	66	0	1	18	0.0555556	0	182	0	0	11	0	0
chr12	111779192	+	A	chr12:111779192	Klc1	SINE	Intron	intron_variant	0	0	-	-	-	-	0	<0.001	<0.001	---	|	4.91236	0.178	0.0059	0.0235	|	0	1	0	0	1	0	0	1	0	0	0	---	0	0	---	0	0	---	0	0	---	0	0	---	0
chr12	111779196	+	A	chr12:111779196	Klc1	SINE	Intron	intron_variant	1	1	-	-	-	-	0	<0.001	<0.001	---	|	1.62195	0.55	0.179	0.0365	|	0	1	0	0	1	0	0	1	0	0	0	---	0	0	---	0	0	---	0	0	---	0	0	---	0
chr12	111779209	+	A	chr12:111779209	Klc1	SINE	Intron	intron_variant	1	1	-	-	-	-	0	<0.001	<0.001	---	|	4.82937	0.157	0.00552	0.0656	|	0	2	0	0	1	0	0	1	0	0	0	---	0	1	0	0	0	---	0	1	0	0	0	---	0
chr12	111780095	+	A	chr12:111780095	Klc1	SINE	Intron	intron_variant	0	0	-	-	-	-	1.66096	0.00316	<0.001	0.363	|	1.37662	0.48	0.185	0.0377	|	0	4	0	0	0	---	0	3	0	0	0	---	0	8	0	0	1	0	0	0	---	0	0	---	0
chr12	112957235	-	T	chr12:112957235	Brf1	.	intergenic	downstream_gene_variant	1	1	-	-	-	-	-2.2481	<0.001	0.00475	0.19	|	2.12633	0.055	0.0126	0.023	|	1	29	0.0344828	0	6	0	0	24	0	0	8	0	0	46	0	0	2	0	14	42	0.333333	0	7	0	0
chr12	112957244	-	T	chr12:112957244	Brf1	.	intergenic	downstream_gene_variant	0	0	-	-	-	-	0	<0.001	<0.001	---	|	-2.01363	<0.001	0.00404	0.182	|	0	33	0	0	6	0	0	22	0	0	9	0	0	49	0	0	6	0	0	42	0	0	6	0	0
chr12	112957246	-	T	chr12:112957246	Brf1	.	intergenic	downstream_gene_variant	1	1	-	-	-	-	0	<0.001	<0.001	---	|	-0.47753	0.00705	0.00982	0.86	|	0	33	0	0	6	0	0	22	0	0	9	0	0	46	0	0	6	0	0	35	0	0	7	0	0
chr12	112957248	-	T	chr12:112957248	Brf1	.	intergenic	downstream_gene_variant	1	1	112958175	927	upstream	undefined	-0.917725	<0.001	0.00189	0.363	|	3.31452	0.00995	<0.001	0.0713	|	0	34	0	0	6	0	1	22	0.0454545	0	9	0	0	46	0	0	6	0	0	36	0	0	7	0	0
chr12	112957251	-	T	chr12:112957251	Brf1	.	intergenic	downstream_gene_variant	1	1	112958173	922	upstream	undefined	0	<0.001	<0.001	---	|	3.8684	0.0249	0.0017	0.0526	|	0	34	0	0	6	0	0	22	0	0	9	0	0	43	0	0	6	0	0	35	0	0	7	0	0
chr12	112957260	-	T	chr12:112957260	Brf1	.	intergenic	downstream_gene_variant	1	1	-	-	-	-	-2.71508	0.00742	0.0487	0.145	|	0.847348	0.247	0.137	0.161	|	7	36	0.194444	2	6	0.333333	2	22	0.0909091	0	13	0	2	50	0.04	0	6	0	7	39	0.179487	3	6	0.5	2
chr12	112957261	-	T	chr12:112957261	Brf1	.	intergenic	downstream_gene_variant	0	0	-	-	-	-	-0.747956	0.00263	0.00442	0.753	|	1.40678	0.0192	0.00723	0.257	|	0	36	0	2	6	0.333333	0	22	0	0	13	0	2	48	0.0416667	0	6	0	7	39	0.179487	0	6	0	0
chr12	112957277	-	T	chr12:112957277	Brf1	.	intergenic	downstream_gene_variant	0	0	-	-	-	-	0	<0.001	<0.001	---	|	0.715778	0.161	0.098	0.277	|	0	35	0	0	7	0	0	22	0	0	11	0	0	48	0	0	6	0	0	36	0	0	6	0	0
chr12	112958187	-	T	chr12:112958187	Brf1	.	intergenic	regulatory_region_variant	0	0	-	-	-	-	-0.896804	<0.001	0.00186	0.363	|	2.87138	0.0293	0.00401	0.109	|	1	24	0.0416667	0	4	0	0	17	0	0	12	0	0	34	0	0	6	0	0	8	0	0	5	0	0
chr12	112958189	-	T	chr12:112958189	Brf1	.	intergenic	regulatory_region_variant	1	1	-	-	-	-	0.675741	0.693	0.434	0.0689	|	0.0700508	0.929	0.885	0.211	|	13	27	0.481481	2	3	0.666667	4	16	0.25	12	12	1	16	33	0.484848	5	6	0.833333	1	8	0.125	1	5	0.2	11
chr12	112958195	-	T	chr12:112958195	Brf1	.	intergenic	regulatory_region_variant	1	1	-	-	-	-	-1.38728	0.00271	0.0071	0.363	|	2.15606	0.0424	0.0095	0.405	|	1	27	0.037037	0	4	0	1	17	0.0588235	0	11	0	2	34	0.0588235	2	5	0.4	0	8	0	0	5	0	0
chr12	112958229	-	T	chr12:112958229	Brf1	.	intergenic	regulatory_region_variant	0	0	112957204	1025	downstream	undefined	0.0745765	0.00212	0.00201	0.965	|	1.56394	0.00517	0.00175	0.467	|	2	30	0.0666667	0	5	0	0	21	0	1	11	0.0909091	0	33	0	0	4	0	0	5	0	0	4	0	0
chr12	112958239	-	T	chr12:112958239	Brf1	.	intergenic	regulatory_region_variant	1	1	-	-	-	-	-1.12999	0.0729	0.16	0.702	|	0.268211	0.931	0.773	0.112	|	6	24	0.25	3	4	0.75	6	21	0.285714	0	16	0	6	24	0.25	3	5	0.6	0	7	0	1	3	0.333333	12
chr12	112958242	-	T	chr12:112958242	Brf1	.	intergenic	regulatory_region_variant	1	1	-	-	-	-	2.06374	0.881	0.211	0.25	|	0.0100413	0.945	0.938	0.875	|	10	24	0.416667	3	4	0.75	9	23	0.391304	10	16	0.625	14	24	0.583333	5	5	1	0	7	0	3	3	1	12
chr13	5868626	+	A	chr13:5868626	Klf6	.	UTR	regulatory_region_variant	0	0	-	-	-	-	-0.608565	0.00677	0.0103	0.608	|	-0.422727	0.0099	0.0133	0.559	|	32	1309	0.0244461	31	2055	0.0150852	37	817	0.0452876	28	1257	0.0222753	41	1170	0.0350427	44	1867	0.0235672	10	321	0.0311526	0	191	0	0
chr13	6592354	-	T	chr13:6592354	Pfkp	.	Intron	non_coding_transcript_exon_variant	0	0	-	-	-	-	0	<0.001	<0.001	---	|	2.2133	0.0126	0.00272	0.0459	|	0	14	0	0	3	0	0	14	0	0	0	---	0	23	0	0	5	0	0	16	0	0	13	0	0
chr13	6597002	-	T	chr13:6597002	Pfkp	.	Intron	non_coding_transcript_variant	0	0	-	-	-	-	-1.04422	<0.001	0.00206	0.363	|	0.803887	0.13	0.0745	0.0179	|	0	9	0	0	1	0	0	4	0	0	0	---	0	7	0	0	4	0	1	13	0.0769231	0	11	0	0
chr13	8851765	-	T	chr13:8851765	Wdr37	SINE	UTR	3_prime_UTR_variant	1	1	-	-	-	-	0	<0.001	<0.001	---	|	0.0973413	0.0187	0.0175	0.959	|	0	19	0	0	37	0	0	14	0	0	34	0	0	22	0	0	36	0	0	24	0	0	22	0	0
chr13	9093991	+	A	chr13:9093991	Larp4b	.	UTR	regulatory_region_variant	0	0	-	-	-	-	-1.25307	<0.001	0.00238	0.374	|	0.248124	0.0223	0.0187	0.883	|	0	190	0	0	163	0	0	136	0	0	107	0	0	194	0	0	163	0	0	6	0	0	12	0	---
chr13	12607943	+	A	chr13:12607943	Ero1lb	.	UTR	3_prime_UTR_variant	0	0	-	-	-	-	-3.24447	0.00179	0.017	0.0732	|	-3.22016	0.00704	0.0656	0.151	|	4	53	0.0754717	0	13	0	2	18	0.111111	0	13	0	2	55	0.0363636	1	30	0.0333333	8	101	0.0792079	0	46	0	0
chr13	13510544	+	A	chr13:13510544	CT010431.1,Nid1	.	UTR	3_prime_UTR_variant	0	0	-	-	-	-	2.93296	0.00764	<0.001	0.178	|	-1.25702	0.0171	0.0408	0.263	|	0	1	0	0	1	0	0	1	0	---	---	---	0	5	0	0	1	0	0	19	0	2	14	0.142857	0
chr13	14051042	-	T	chr13:14051042	Ggps1	SINE	UTR	3_prime_UTR_variant	0	0	-	-	-	-	-1.0737	<0.001	0.0021	0.363	|	0.365156	0.0102	0.00794	0.766	|	0	26	0	0	23	0	0	26	0	0	9	0	0	32	0	0	5	0	4	46	0.0869565	0	20	0	0
chr13	14051043	-	T	chr13:14051043	Ggps1	SINE	UTR	3_prime_UTR_variant	1	1	-	-	-	-	0.696369	0.0137	0.00847	0.781	|	0.533619	0.26	0.179	0.0659	|	3	26	0.115385	0	23	0	0	28	0	0	9	0	0	32	0	1	5	0.2	6	47	0.12766	7	20	0.35	0
chr13	14052036	-	T	chr13:14052036	Ggps1	SINE	UTR	3_prime_UTR_variant	0	0	14053515	1479	upstream	UTR	-3.68695	<0.001	0.0129	0.0263	|	-0.882611	0.0072	0.0133	0.514	|	0	55	0	0	16	0	0	55	0	0	16	0	3	91	0.032967	0	25	0	3	86	0.0348837	0	35	0	4
chr13	14052057	-	T	chr13:14052057	Ggps1	SINE	UTR	3_prime_UTR_variant	0	0	-	-	-	-	-0.449926	0.021	0.0287	0.664	|	-0.700329	0.01	0.0163	0.42	|	2	63	0.031746	0	15	0	3	56	0.0535714	1	19	0.0526316	6	81	0.0740741	5	20	0.25	7	77	0.0909091	2	34	0.0588235	0
chr13	14052089	-	T	chr13:14052089	Ggps1	SINE	UTR	3_prime_UTR_variant	1	1	14053448	1359	upstream	UTR	-0.0381041	0.00217	0.00222	0.984	|	2.41262	0.0437	0.0082	0.146	|	0	62	0	0	17	0	0	45	0	0	13	0	0	65	0	0	14	0	0	80	0	3	29	0.103448	4
chr13	14053517	-	T	chr13:14053517	Ggps1	SINE	UTR	3_prime_UTR_variant	0	0	14052034	1483	downstream	UTR	1.46219	0.00589	0.00214	0.339	|	-1.67282	0.0115	0.0367	0.342	|	0	14	0	1	3	0.333333	0	15	0	0	7	0	2	21	0.0952381	1	8	0.125	0	11	0	0	6	0	0
chr13	17745256	-	T	chr13:17745256	Cdk13,Mir466i	SINE	Intron	non_coding_transcript_variant	1	1	17746783	1527	upstream	intronic	-0.37211	0.00218	0.00282	0.862	|	5.03125	0.091	0.00278	0.182	|	0	31	0	0	49	0	0	15	0	0	37	0	0	12	0	5	47	0.106383	0	6	0	0	2	0	4
chr13	21389904	-	T	chr13:21389904	Zkscan3	LTR	UTR	3_prime_UTR_variant	1	1	-	-	-	-	0	<0.001	<0.001	---	|	2.81955	0.0283	0.004	0.069	|	0	30	0	0	8	0	0	23	0	0	0	---	0	44	0	0	9	0	0	9	0	0	0	---	0
chr13	21389906	-	T	chr13:21389906	Zkscan3	LTR	UTR	3_prime_UTR_variant	1	1	-	-	-	-	1.27398	0.00242	<0.001	0.363	|	1.03553	0.00832	0.00406	0.65	|	0	29	0	1	5	0.2	0	22	0	0	0	---	0	42	0	0	9	0	0	9	0	0	0	---	0
chr13	21389917	-	T	chr13:21389917	Zkscan3	LTR	UTR	3_prime_UTR_variant	0	0	-	-	-	-	0	<0.001	<0.001	---	|	3.44974	0.0461	0.00422	0.0574	|	0	26	0	0	7	0	0	26	0	0	0	---	0	40	0	0	8	0	0	9	0	0	0	---	0
chr13	21389918	-	T	chr13:21389918	Zkscan3	LTR	UTR	3_prime_UTR_variant	0	0	-	-	-	-	0	<0.001	<0.001	---	|	1.25307	0.00238	<0.001	0.374	|	0	26	0	0	7	0	0	26	0	0	0	---	0	40	0	0	8	0	0	9	0	0	0	---	0
chr13	21389919	-	T	chr13:21389919	Zkscan3	LTR	UTR	3_prime_UTR_variant	0	0	-	-	-	-	1.19307	0.00229	<0.001	0.363	|	1.03169	0.00204	<0.001	0.374	|	0	25	0	1	7	0.142857	0	26	0	0	0	---	0	39	0	0	8	0	0	9	0	0	0	---	0
chr13	21389922	-	T	chr13:21389922	Zkscan3	LTR	UTR	3_prime_UTR_variant	0	0	-	-	-	-	1.35974	0.00257	<0.001	0.363	|	3.11088	0.246	0.0285	0.0635	|	0	24	0	2	7	0.285714	0	26	0	0	0	---	0	37	0	0	7	0	0	9	0	0	0	---	0
chr13	21389933	-	T	chr13:21389933	Zkscan3	LTR	UTR	3_prime_UTR_variant	0	0	21392405	2472	upstream	UTR	-0.553655	0.00215	0.00316	0.809	|	0.419907	0.0496	0.0371	0.859	|	0	24	0	1	10	0.1	0	24	0	0	0	---	0	32	0	0	8	0	0	5	0	0	0	---	5
chr13	21389934	-	T	chr13:21389934	Zkscan3	LTR	UTR	3_prime_UTR_variant	0	0	21392404	2470	upstream	UTR	1.27398	0.00242	<0.001	0.363	|	1.43516	0.078	0.0288	0.246	|	0	25	0	2	10	0.2	0	26	0	0	0	---	0	31	0	0	8	0	0	5	0	0	0	---	0
chr13	21389999	-	T	chr13:21389999	Zkscan3	LTR	UTR	3_prime_UTR_variant	0	0	21392343	2344	upstream	UTR	0.105378	0.00215	0.002	0.363	|	1.31253	0.453	0.182	0.0652	|	0	30	0	0	10	0	0	34	0	0	0	---	2	31	0.0645161	1	10	0.1	0	5	0	0	0	---	0
chr13	21390009	-	T	chr13:21390009	Zkscan3	LTR	UTR	3_prime_UTR_variant	0	0	21392330	2321	upstream	UTR	1.08439	0.00212	<0.001	0.363	|	-1.26867	0.00221	0.00532	0.598	|	0	28	0	0	10	0	0	42	0	0	1	0	0	40	0	1	11	0.0909091	0	4	0	0	0	---	0
chr13	21390018	-	T	chr13:21390018	Zkscan3	LTR	UTR	3_prime_UTR_variant	0	0	21392320	2302	upstream	UTR	0.0536547	0.00199	0.00192	0.363	|	0.868557	0.186	0.102	0.211	|	0	35	0	0	10	0	0	44	0	0	1	0	2	40	0.05	1	16	0.0625	0	5	0	0	0	---	0
chr13	21390037	-	T	chr13:21390037	Zkscan3	LTR	UTR	3_prime_UTR_variant	0	0	21392301	2264	upstream	UTR	0	<0.001	<0.001	---	|	-0.951266	<0.001	0.00193	0.374	|	0	36	0	0	10	0	0	39	0	0	1	0	0	37	0	0	14	0	0	8	0	0	0	---	0
chr13	21390051	-	T	chr13:21390051	Zkscan3	LTR	UTR	3_prime_UTR_variant	0	0	-	-	-	-	1.0264	0.00204	<0.001	0.363	|	-1.2363	0.00223	0.00526	0.609	|	0	38	0	0	5	0	0	44	0	0	1	0	0	35	0	1	14	0.0714286	0	7	0	0	0	---	0
chr13	21390055	-	T	chr13:21390055	Zkscan3	LTR	UTR	3_prime_UTR_variant	0	0	-	-	-	-	2.30038	0.00493	<0.001	0.178	|	1.29569	0.0771	0.0314	0.0779	|	0	38	0	1	5	0.2	0	45	0	0	1	0	0	34	0	1	14	0.0714286	0	8	0	0	0	---	0
chr13	21392309	-	T	chr13:21392309	Mir6942,Zkscan3	LTR	UTR	3_prime_UTR_variant	0	0	21390030	2279	downstream	UTR	1.35974	0.00257	<0.001	0.363	|	-1.37655	0.00218	0.00565	0.44	|	0	16	0	0	4	0	0	17	0	2	7	0.285714	0	20	0	0	7	0	0	1	0	0	0	---	0
chr13	21392323	-	T	chr13:21392323	Mir6942,Zkscan3	LTR	UTR	3_prime_UTR_variant	1	1	21390017	2306	downstream	UTR	1.45723	0.00275	<0.001	0.363	|	1.2629	0.0223	0.00931	0.564	|	0	21	0	0	5	0	0	19	0	3	7	0.428571	0	21	0	0	6	0	0	1	0	0	0	---	0
chr13	21392337	-	T	chr13:21392337	Mir6942,Zkscan3	LTR	UTR	3_prime_UTR_variant	0	0	21390002	2335	downstream	UTR	0	<0.001	<0.001	---	|	1.73376	0.0068	0.00204	0.262	|	0	25	0	0	5	0	0	15	0	0	5	0	0	20	0	0	7	0	0	1	0	0	0	---	0
chr13	21392338	-	T	chr13:21392338	Mir6942,Zkscan3	LTR	UTR	3_prime_UTR_variant	0	0	21390001	2337	downstream	UTR	0	<0.001	<0.001	---	|	-1.04183	0.00261	0.00538	0.425	|	0	25	0	0	5	0	0	14	0	0	5	0	0	20	0	0	7	0	0	1	0	0	0	---	0
chr13	21392342	-	T	chr13:21392342	Mir6942,Zkscan3	LTR	UTR	3_prime_UTR_variant	1	1	21389999	2343	downstream	UTR	1.32763	0.00251	<0.001	0.363	|	2.39098	0.0326	0.00621	0.168	|	0	24	0	0	5	0	0	15	0	1	4	0.25	0	20	0	0	6	0	0	1	0	0	0	---	0
chr13	21392375	-	T	chr13:21392375	Mir6942,Zkscan3	LTR	UTR	3_prime_UTR_variant	0	0	21389962	2413	downstream	UTR	0	<0.001	<0.001	---	|	4.50756	0.111	0.00488	0.0245	|	0	24	0	0	8	0	0	14	0	0	4	0	0	24	0	0	4	0	0	0	---	0	0	---	0
chr13	21392398	-	T	chr13:21392398	Mir6942,Zkscan3	LTR	UTR	3_prime_UTR_variant	0	0	21389940	2458	downstream	UTR	0	<0.001	<0.001	---	|	-1.39316	<0.001	0.00263	0.374	|	0	25	0	0	9	0	0	13	0	0	4	0	0	20	0	0	5	0	0	0	---	0	0	---	0
chr13	21392406	-	T	chr13:21392406	Mir6942,Zkscan3	LTR	UTR	3_prime_UTR_variant	0	0	21389932	2474	downstream	UTR	0	<0.001	<0.001	---	|	0.568617	0.226	0.152	0.461	|	0	26	0	0	8	0	0	12	0	0	4	0	0	18	0	0	5	0	0	0	---	0	0	---	0
chr13	21392420	-	T	chr13:21392420	Mir6942,Zkscan3	LTR	UTR	3_prime_UTR_variant	0	0	-	-	-	-	0	<0.001	<0.001	---	|	-0.730768	0.00268	0.00445	0.578	|	0	25	0	0	6	0	0	11	0	0	5	0	0	16	0	0	3	0	0	0	---	0	5	0	0
chr13	21392421	-	T	chr13:21392421	Mir6942,Zkscan3	LTR	UTR	3_prime_UTR_variant	0	0	-	-	-	-	0	<0.001	<0.001	---	|	0.739441	0.0553	0.0331	0.754	|	0	25	0	0	6	0	0	11	0	0	6	0	0	16	0	0	3	0	0	0	---	0	5	0	0
chr13	21392432	-	T	chr13:21392432	Mir6942,Zkscan3	LTR	UTR	3_prime_UTR_variant	0	0	-	-	-	-	0	<0.001	<0.001	---	|	-3.684	<0.001	0.0129	0.0765	|	0	26	0	0	5	0	0	12	0	0	7	0	0	14	0	0	3	0	0	0	---	0	5	0	0
chr13	21392441	-	T	chr13:21392441	Mir6942,Zkscan3	LTR	UTR	3_prime_UTR_variant	0	0	-	-	-	-	1.27398	0.00242	<0.001	0.363	|	-2.07663	0.00232	0.00977	0.224	|	0	26	0	0	5	0	0	13	0	2	10	0.2	0	14	0	0	4	0	0	0	---	0	5	0	0
chr13	21392445	-	T	chr13:21392445	Mir6942,Zkscan3	LTR	UTR	3_prime_UTR_variant	0	0	-	-	-	-	1.66096	0.00316	<0.001	0.363	|	1.21878	0.328	0.141	0.245	|	0	24	0	0	6	0	0	14	0	0	11	0	0	15	0	0	4	0	0	0	---	5	5	1	0
chr13	21392480	-	T	chr13:21392480	Mir6942,Zkscan3	LTR	UTR	3_prime_UTR_variant	0	0	-	-	-	-	-1.14639	<0.001	0.00221	0.363	|	-1.29385	0.0621	0.152	0.431	|	0	17	0	0	5	0	0	14	0	0	10	0	2	17	0.117647	0	3	0	0	0	---	0	5	0	0
chr13	21443023	-	T	chr13:21443023	4930470G03Rik,Mir1896,Pgbd1,Zscan26	SINE	UTR	regulatory_region_variant	0	0	-	-	-	-	-0.441772	0.00209	0.00284	0.798	|	-0.176984	0.132	0.149	0.682	|	0	34	0	2	24	0.0833333	1	39	0.025641	0	15	0	1	49	0.0204082	0	35	0	0	64	0	0	79	0	0
chr13	23573160	-	T	chr13:23573160	Gm44359,Gm44394,Hist1h2ad,Hist1h2ae,Hist1h2bf,Hist1h2bg,Hist1h3d	LTR	intergenic	regulatory_region_variant	0	0	-	-	-	-	3.19531	0.014	0.00152	0.0565	|	0	<0.001	<0.001	---	|	0	65	0	0	37	0	0	32	0	4	43	0.0930233	0	65	0	0	19	0	1	80	0.0125	1	40	0.025	0
chr13	24732495	+	A	chr13:24732495	Ripor2	SINE	UTR	3_prime_UTR_variant	0	0	-	-	-	-	0.689112	0.00221	0.00137	0.632	|	1.82794	0.0429	0.0121	0.543	|	0	185	0	---	---	---	0	149	0	0	4	0	1	207	0.00483092	0	6	0	0	124	0	1	19	0.0526316	0
chr13	24814598	+	A	chr13:24814598	Acot13,BC005537,Gm22358	SINE	UTR	3_prime_UTR_variant	0	0	24815603	1005	downstream	UTR	-1.546	0.0041	0.012	0.496	|	1.49436	0.0195	0.00692	0.69	|	4	48	0.0833333	0	7	0	3	75	0.04	0	22	0	1	89	0.011236	3	17	0.176471	3	38	0.0789474	0	18	0	0
chr13	24814627	+	A	chr13:24814627	Acot13,BC005537,Gm22358	SINE	UTR	regulatory_region_variant	0	0	24815573	946	downstream	UTR	-3.60541	0.00215	0.0262	0.0394	|	-0.0258566	0.00824	0.00839	0.992	|	3	46	0.0652174	1	10	0.1	1	62	0.016129	0	22	0	6	80	0.075	0	18	0	6	52	0.115385	0	14	0	0
chr13	24814650	+	A	chr13:24814650	Acot13,BC005537,Gm22358	SINE	UTR	regulatory_region_variant	0	0	24815549	899	downstream	UTR	-3.90424	0.00447	0.0669	0.0335	|	-2.72483	0.0028	0.0185	0.4	|	6	47	0.12766	1	12	0.0833333	4	76	0.0526316	0	24	0	4	86	0.0465116	2	21	0.0952381	6	62	0.0967742	0	23	0	4
chr13	24814652	+	A	chr13:24814652	Acot13,BC005537,Gm22358	SINE	UTR	regulatory_region_variant	0	0	24815547	895	downstream	UTR	-2.04533	0.0115	0.0473	0.253	|	-1.94242	0.00715	0.0275	0.538	|	9	48	0.1875	1	12	0.0833333	5	78	0.0641026	0	24	0	14	88	0.159091	4	21	0.190476	12	62	0.193548	0	24	0	0
chr13	24815572	+	A	chr13:24815572	Acot13,BC005537,Gm22358	SINE	UTR	3_prime_UTR_variant	0	0	24814628	944	upstream	UTR	-2.18349	0.0046	0.0209	0.212	|	1.99316	0.00398	<0.001	0.374	|	1	33	0.030303	0	11	0	0	25	0	0	13	0	2	32	0.0625	1	15	0.0666667	6	53	0.113208	1	7	0.142857	16
chr13	24815585	+	A	chr13:24815585	Acot13,BC005537,Gm22358	SINE	UTR	3_prime_UTR_variant	0	0	24814616	969	upstream	UTR	-1.54862	0.0868	0.254	0.263	|	0.0815316	0.169	0.159	0.724	|	6	35	0.171429	0	10	0	5	30	0.166667	2	14	0.142857	8	39	0.205128	1	17	0.0588235	16	61	0.262295	4	17	0.235294	20
chr13	24815587	+	A	chr13:24815587	Acot13,BC005537,Gm22358	SINE	UTR	3_prime_UTR_variant	0	0	24814613	974	upstream	UTR	-2.39274	0.00197	0.0104	0.256	|	-1.79316	<0.001	0.00347	0.374	|	1	35	0.0285714	0	11	0	0	32	0	0	14	0	0	39	0	1	17	0.0588235	2	61	0.0327869	0	16	0	1
chr13	24815590	+	A	chr13:24815590	Acot13,BC005537,Gm22358	SINE	UTR	3_prime_UTR_variant	0	0	24814610	980	upstream	UTR	-0.995262	0.102	0.202	0.506	|	-0.0517837	0.123	0.128	0.987	|	7	36	0.194444	0	11	0	3	33	0.0909091	2	14	0.142857	11	41	0.268293	4	17	0.235294	15	63	0.238095	4	17	0.235294	9
chr13	24815603	+	A	chr13:24815603	Acot13,BC005537,Gm22358	SINE	UTR	3_prime_UTR_variant	0	0	24814598	1005	upstream	UTR	-0.56702	0.00863	0.0128	0.768	|	0	<0.001	<0.001	---	|	1	39	0.025641	0	14	0	1	33	0.030303	1	14	0.0714286	0	45	0	0	18	0	6	71	0.084507	1	15	0.0666667	0
chr13	24815609	+	A	chr13:24815609	Acot13,BC005537,Gm22358	SINE	UTR	3_prime_UTR_variant	0	0	24814593	1016	upstream	UTR	-1.48717	0.00511	0.0143	0.506	|	1.32877	0.00251	<0.001	0.374	|	1	46	0.0217391	3	14	0.214286	1	33	0.030303	0	14	0	4	50	0.08	0	16	0	1	76	0.0131579	0	17	0	0
chr13	24815611	+	A	chr13:24815611	Acot13,BC005537,Gm22358	SINE	UTR	3_prime_UTR_variant	0	0	24814589	1022	upstream	UTR	-1.05606	0.0366	0.0761	0.562	|	1.22876	0.00632	0.0027	0.429	|	3	46	0.0652174	3	13	0.230769	1	33	0.030303	0	14	0	3	49	0.0612245	2	14	0.142857	15	73	0.205479	0	17	0	6
chr13	24815615	+	A	chr13:24815615	Acot13,BC005537,Gm22358	SINE	UTR	3_prime_UTR_variant	0	0	24814585	1030	upstream	UTR	0.0744014	0.196	0.186	0.89	|	1.30994	0.0927	0.0374	0.713	|	6	46	0.130435	3	15	0.2	6	33	0.181818	1	14	0.0714286	7	48	0.145833	1	15	0.0666667	17	68	0.25	4	17	0.235294	7
chr13	24815643	+	A	chr13:24815643	Acot13,BC005537,Gm22358	SINE	UTR	3_prime_UTR_variant	0	0	24814556	1087	upstream	UTR	-1.02532	0.124	0.251	0.43	|	1.45934	0.0526	0.0191	0.632	|	11	53	0.207547	5	19	0.263158	12	39	0.307692	1	12	0.0833333	5	51	0.0980392	0	14	0	30	74	0.405405	15	21	0.714286	23
chr13	24815645	+	A	chr13:24815645	Acot13,BC005537,Gm22358	SINE	UTR	3_prime_UTR_variant	0	0	24814553	1092	upstream	UTR	-2.31292	0.00197	0.0098	0.094	|	0	<0.001	<0.001	---	|	0	52	0	0	21	0	0	40	0	0	12	0	1	53	0.0188679	0	13	0	2	74	0.027027	0	21	0	2
chr13	24815646	+	A	chr13:24815646	Acot13,BC005537,Gm22358	SINE	UTR	3_prime_UTR_variant	0	0	24814553	1093	upstream	UTR	-1.77196	0.0288	0.0984	0.287	|	0.108114	0.00744	0.0069	0.975	|	7	53	0.132075	5	21	0.238095	4	41	0.097561	0	12	0	4	55	0.0727273	0	14	0	4	72	0.0555556	1	21	0.047619	15
chr13	24997809	-	T	chr13:24997809	Mrs2	.	Intron	intron_variant	1	1	24998332	523	upstream	intronic	0	<0.001	<0.001	---	|	5.78227	0.055	<0.001	0.000246	|	0	7	0	0	12	0	0	1	0	0	1	0	0	10	0	0	6	0	0	4	0	0	6	0	0
chr13	24997814	-	T	chr13:24997814	Mrs2	.	Intron	intron_variant	0	0	24998327	513	upstream	intronic	1.44064	0.00271	<0.001	0.363	|	4.70778	0.0261	<0.001	0.0177	|	0	6	0	0	12	0	0	1	0	0	1	0	0	10	0	2	5	0.4	0	4	0	0	6	0	0
chr13	24997818	-	T	chr13:24997818	Mrs2	.	Intron	intron_variant	1	1	24998323	505	upstream	intronic	1.56347	0.00296	<0.001	0.363	|	3.60957	0.378	0.0309	0.034	|	0	5	0	0	12	0	0	0	---	0	1	0	0	10	0	2	3	0.666667	0	4	0	0	6	0	0
chr13	24997838	-	T	chr13:24997838	Mrs2	.	Intron	intron_variant	0	0	-	-	-	-	3.05777	0.00833	<0.001	0.177	|	3.69938	0.0893	0.00687	0.0979	|	0	6	0	0	13	0	0	0	---	0	1	0	0	7	0	1	3	0.333333	0	4	0	0	6	0	0
chr13	24997990	-	T	chr13:24997990	Mrs2	.	Intron	intron_variant	0	0	-	-	-	-	0	<0.001	<0.001	---	|	0.172119	0.00505	0.00448	0.931	|	0	14	0	0	9	0	0	0	---	0	0	---	0	4	0	0	8	0	0	1	0	0	2	0	0
chr13	24998155	-	T	chr13:24998155	Mrs2	.	Intron	intron_variant	1	1	-	-	-	-	2.72443	0.0209	0.00316	0.187	|	1.64001	0.611	0.196	0.0369	|	0	11	0	0	3	0	0	6	0	0	1	0	0	9	0	1	12	0.0833333	1	1	1	8	8	1	0
chr13	24998272	-	T	chr13:24998272	Mrs2	.	Intron	intron_variant	0	0	-	-	-	-	0	<0.001	<0.001	---	|	-0.0511081	0.0462	0.0479	0.68	|	0	8	0	0	2	0	0	7	0	0	1	0	0	14	0	0	0	---	0	0	---	0	2	0	0
chr13	24998321	-	T	chr13:24998321	Mrs2	.	Intron	intron_variant	1	1	24997821	500	downstream	intronic	0	<0.001	<0.001	---	|	5.54744	0.0468	<0.001	0.017	|	0	8	0	0	0	---	0	5	0	0	4	0	0	16	0	0	2	0	0	0	---	0	4	0	0
chr13	24998323	-	T	chr13:24998323	Mrs2	.	Intron	intron_variant	0	0	24997817	506	downstream	intronic	0	<0.001	<0.001	---	|	4.31364	0.108	0.00544	0.0207	|	0	8	0	0	0	---	0	5	0	0	4	0	0	15	0	0	2	0	0	2	0	0	4	0	0
chr13	24998324	-	T	chr13:24998324	Mrs2	.	Intron	intron_variant	0	0	24997817	507	downstream	intronic	0	<0.001	<0.001	---	|	3.35216	0.135	0.0132	0.11	|	0	7	0	0	0	---	0	5	0	0	4	0	0	15	0	0	4	0	0	2	0	0	4	0	0
chr13	24998325	-	T	chr13:24998325	Mrs2	.	Intron	intron_variant	1	1	24997816	509	downstream	intronic	0	<0.001	<0.001	---	|	2.26619	0.23	0.0478	0.196	|	0	7	0	0	0	---	0	5	0	0	4	0	0	14	0	0	4	0	0	2	0	0	4	0	0
chr13	24998327	-	T	chr13:24998327	Mrs2	.	Intron	intron_variant	0	0	24997814	513	downstream	intronic	0	<0.001	<0.001	---	|	4.97887	0.0777	0.00246	0.0194	|	0	7	0	0	0	---	0	5	0	0	5	0	0	14	0	0	4	0	0	2	0	0	4	0	0
chr13	24998328	-	T	chr13:24998328	Mrs2	.	Intron	intron_variant	1	1	24997813	515	downstream	intronic	2.76394	0.00679	<0.001	0.181	|	2.02257	0.389	0.0958	0.00321	|	0	7	0	0	0	---	0	5	0	0	5	0	0	13	0	0	4	0	0	2	0	1	8	0.125	0
chr13	24998329	-	T	chr13:24998329	Mrs2	.	Intron	intron_variant	0	0	24997812	517	downstream	intronic	0	<0.001	<0.001	---	|	2.25622	0.242	0.0506	0.218	|	0	7	0	0	0	---	0	5	0	0	5	0	0	13	0	0	4	0	0	2	0	0	8	0	0
chr13	24998334	-	T	chr13:24998334	Mrs2	.	Intron	intron_variant	0	0	24997807	527	downstream	intronic	0	<0.001	<0.001	---	|	1.93839	0.00383	<0.001	0.186	|	0	7	0	0	1	0	0	5	0	0	6	0	0	13	0	0	5	0	0	2	0	0	10	0	0
chr13	29023188	+	A	chr13:29023188	A330102I10Rik	SINE	Exon	non_coding_transcript_exon_variant	0	0	-	-	-	-	---	---	---	---	|	0.177938	0.00699	0.00618	0.931	|	---	---	---	---	---	---	0	1	0	---	---	---	---	---	---	---	---	---	0	1	0	---	---	---	---
chr13	30815979	-	T	chr13:30815979	Exoc2	LTR	Intron	intron_variant	0	0	30815709	270	downstream	intronic	0	<0.001	<0.001	---	|	5.37537	0.139	0.00336	0.0337	|	0	12	0	0	7	0	0	5	0	0	10	0	0	10	0	0	10	0	0	14	0	0	13	0	0
chr13	41639593	+	A	chr13:41639593	Tmem170b	SINE	UTR	3_prime_UTR_variant	0	0	-	-	-	-	0	<0.001	<0.001	---	|	1.35971	0.0167	0.00651	0.467	|	0	49	0	0	33	0	0	40	0	0	18	0	0	47	0	0	18	0	0	26	0	0	24	0	0
chr13	43136182	+	A	chr13:43136182	Phactr1	.	UTR	3_prime_UTR_variant	0	0	-	-	-	-	0	<0.001	<0.001	---	|	1.10085	0.0252	0.0118	0.309	|	---	---	---	---	---	---	0	1	0	---	---	---	0	1	0	---	---	---	---	---	---	---	---	---	---
chr13	43196380	-	T	chr13:43196380	Gfod1	.	UTR	regulatory_region_variant	0	0	-	-	-	-	-2.82006	0.00163	0.0115	0.0458	|	0.867286	0.00182	<0.001	0.374	|	4	160	0.025	0	115	0	6	132	0.0454545	0	71	0	8	148	0.0540541	2	105	0.0190476	0	71	0	0	38	0	0
chr13	43399943	+	A	chr13:43399943	Nol7,Ranbp9,Sirt5	SINE	Intron	regulatory_region_variant	0	0	-	-	-	-	0	<0.001	<0.001	---	|	4.14039	0.216	0.0123	0.0408	|	0	27	0	0	51	0	0	25	0	0	28	0	0	33	0	0	60	0	0	82	0	0	28	0	0
chr13	49385820	+	A	chr13:49385820	Bicd2	.	UTR	3_prime_UTR_variant	0	0	-	-	-	-	-1.72215	0.00911	0.0301	0.325	|	-2.28529	0.00512	0.0249	0.0657	|	11	100	0.11	0	81	0	6	87	0.0689655	3	61	0.0491803	7	130	0.0538462	8	91	0.0879121	2	87	0.0229885	7	53	0.132075	4
chr13	49386156	+	A	chr13:49386156	Bicd2	.	UTR	3_prime_UTR_variant	0	0	49385838	318	upstream	UTR	0.67204	0.00686	0.00431	0.621	|	0.186981	0.00171	0.0015	0.872	|	2	203	0.00985222	2	102	0.0196078	1	168	0.00595238	2	99	0.020202	1	322	0.00310559	7	170	0.0411765	0	201	0	0	130	0	2
chr13	49386157	+	A	chr13:49386157	Bicd2	.	UTR	3_prime_UTR_variant	0	0	49385838	319	upstream	UTR	0.241627	0.0268	0.0227	0.569	|	-1.43541	0.00452	0.0122	0.48	|	5	205	0.0243902	9	101	0.0891089	8	169	0.0473373	6	100	0.06	12	326	0.0368098	10	171	0.0584795	10	200	0.05	4	129	0.0310078	0
chr13	49386158	+	A	chr13:49386158	Bicd2	.	UTR	3_prime_UTR_variant	0	0	49385838	320	upstream	UTR	-0.571234	0.0122	0.0181	0.581	|	-1.19321	0.00439	0.01	0.069	|	4	205	0.0195122	4	102	0.0392157	5	168	0.0297619	0	102	0	6	329	0.0182371	12	170	0.0705882	8	198	0.040404	4	129	0.0310078	0
chr13	49386166	+	A	chr13:49386166	Bicd2	.	UTR	3_prime_UTR_variant	0	0	49385834	332	upstream	UTR	-0.181711	0.00312	0.00354	0.907	|	-1.20117	0.00131	0.00301	0.369	|	3	212	0.0141509	0	105	0	4	175	0.0228571	0	99	0	2	327	0.00611621	5	175	0.0285714	0	192	0	4	123	0.0325203	0
chr13	51429583	-	T	chr13:51429583	Shc3	SINE	intergenic	downstream_gene_variant	0	0	-	-	-	-	0	<0.001	<0.001	---	|	1.42749	0.0673	0.025	0.296	|	---	---	---	---	---	---	---	---	---	---	---	---	---	---	---	---	---	---	0	1	0	0	5	0	---
chr13	51430178	-	T	chr13:51430178	Shc3	.	intergenic	downstream_gene_variant	0	0	-	-	-	-	0	<0.001	<0.001	---	|	1.33691	0.0445	0.0176	0.282	|	---	---	---	---	---	---	---	---	---	---	---	---	---	---	---	---	---	---	0	4	0	0	1	0	0
chr13	52647393	+	A	chr13:52647393	Syk	.	UTR	3_prime_UTR_variant	0	0	-	-	-	-	-2.72122	0.00274	0.018	0.0332	|	0.866717	0.0378	0.0207	0.708	|	31	1275	0.0243137	2	140	0.0142857	20	1015	0.0197044	4	136	0.0294118	53	1350	0.0392593	0	224	0	9	1648	0.00546117	0	508	0	13
chr13	54452998	-	T	chr13:54452998	-	LTR	intergenic	intergenic_variant	0	0	-	-	-	-	0	<0.001	<0.001	---	|	-2.19529	0.0324	0.148	0.232	|	0	3	0	0	7	0	0	1	0	0	4	0	0	2	0	0	6	0	0	0	---	0	13	0	---
chr13	54453012	-	T	chr13:54453012	-	LTR	intergenic	intergenic_variant	0	0	-	-	-	-	1.99145	0.00398	<0.001	0.391	|	2.96354	0.147	0.0188	0.169	|	0	3	0	0	5	0	0	1	0	0	4	0	0	2	0	1	4	0.25	0	0	---	0	13	0	---
chr13	54555862	-	T	chr13:54555862	4833439L19Rik,Simc1	SINE	Intron	non_coding_transcript_variant	1	1	54555489	373	downstream	intronic	0.0794063	0.00236	0.00224	0.363	|	5.81418	0.129	0.00229	0.00996	|	2	16	0.125	4	23	0.173913	0	11	0	0	10	0	0	25	0	0	22	0	0	27	0	0	1	0	0
chr13	54555917	-	T	chr13:54555917	4833439L19Rik,Simc1	SINE	Intron	non_coding_transcript_variant	0	0	54555444	473	downstream	intronic	0.20883	0.0142	0.0123	0.929	|	5.06	0.264	0.0079	0.0657	|	0	11	0	4	16	0.25	0	4	0	0	9	0	1	22	0.0454545	1	20	0.05	2	13	0.153846	2	3	0.666667	0
chr13	54641942	+	A	chr13:54641942	Faf2	SINE	Intron	non_coding_transcript_exon_variant	0	0	54643297	1355	downstream	intronic	3.19718	0.029	0.00316	0.118	|	4.55844	0.485	0.0206	0.0751	|	0	3	0	1	10	0.1	0	1	0	1	18	0.0555556	0	4	0	3	10	0.3	1	1	1	5	14	0.357143	0
chr13	55134602	+	A	chr13:55134602	Gm17617,Zfp346	SINE	UTR	3_prime_UTR_variant	0	0	-	-	-	-	-0.770989	<0.001	0.00171	0.363	|	1.93452	0.0363	0.0095	0.257	|	0	43	0	0	5	0	0	41	0	0	5	0	0	45	0	0	4	0	0	206	0	0	28	0	0
chr13	55188448	+	A	chr13:55188448	-	LTR	intergenic	regulatory_region_variant	0	0	-	-	-	-	0.661682	0.094	0.0594	0.622	|	1.52518	0.00979	0.0034	0.0543	|	7	22	0.318182	5	74	0.0675676	4	17	0.235294	3	31	0.0967742	3	46	0.0652174	10	124	0.0806452	12	38	0.315789	15	63	0.238095	0
chr13	55525572	-	T	chr13:55525572	Ddx41,Dok3	SINE	Intron	non_coding_transcript_variant	0	0	55526448	876	upstream	intronic	2.28636	0.144	0.0294	0.125	|	3.98631	0.0158	<0.001	0.178	|	2	89	0.0224719	38	126	0.301587	6	67	0.0895522	21	81	0.259259	2	106	0.0188679	31	88	0.352273	8	106	0.0754717	3	35	0.0857143	0
chr13	55564532	-	T	chr13:55564532	Fam193b	SINE	UTR	5_prime_UTR_variant	0	0	-	-	-	-	0	<0.001	<0.001	---	|	-1.33519	0.00369	0.00931	0.536	|	0	142	0	0	141	0	0	117	0	0	57	0	0	187	0	0	89	0	0	105	0	0	10	0	0
chr13	55610274	+	A	chr13:55610274	B4galt7	LTR	UTR	3_prime_UTR_variant	0	0	55612541	2267	downstream	undefined	-2.09188	<0.001	0.00426	0.0892	|	-0.276647	0.0418	0.0506	0.714	|	0	78	0	0	35	0	0	84	0	0	32	0	0	124	0	0	42	0	2	304	0.00657895	0	146	0	8
chr13	55625894	+	A	chr13:55625894	Caml	SINE	Intron	intron_variant	0	0	55626683	789	downstream	intronic	0	<0.001	<0.001	---	|	1.62918	0.174	0.0562	0.354	|	0	1	0	0	3	0	0	2	0	0	0	---	0	3	0	0	1	0	0	7	0	0	2	0	0
chr13	55625905	+	A	chr13:55625905	Caml	SINE	Intron	intron_variant	0	0	55626672	767	downstream	intronic	0	<0.001	<0.001	---	|	4.70476	0.172	0.00658	0.0431	|	0	2	0	0	1	0	0	1	0	0	1	0	0	3	0	0	1	0	0	9	0	0	2	0	0
chr13	55625923	+	A	chr13:55625923	Caml	SINE	Intron	intron_variant	0	0	55626654	731	downstream	intronic	0	<0.001	<0.001	---	|	2.37979	0.0116	0.00223	0.228	|	0	1	0	0	3	0	0	1	0	0	5	0	0	8	0	0	1	0	0	9	0	0	0	---	0
chr13	55625929	+	A	chr13:55625929	Caml	SINE	Intron	intron_variant	0	0	55626651	722	downstream	intronic	1.44064	0.00271	<0.001	0.363	|	3.35725	0.299	0.0291	0.12	|	0	1	0	0	3	0	0	2	0	0	6	0	0	8	0	0	2	0	0	9	0	0	4	0	0
chr13	55625938	+	A	chr13:55625938	Caml	SINE	Intron	intron_variant	0	0	55626639	701	downstream	intronic	1.27398	0.00242	<0.001	0.363	|	2.22388	0.0677	0.0145	0.187	|	0	3	0	0	3	0	0	2	0	0	6	0	0	8	0	0	2	0	0	9	0	0	4	0	0
chr13	55625940	+	A	chr13:55625940	Caml	SINE	Intron	intron_variant	0	0	55626637	697	downstream	intronic	0	<0.001	<0.001	---	|	1.82764	0.18	0.0506	0.192	|	0	3	0	0	3	0	0	2	0	0	6	0	0	8	0	0	2	0	0	7	0	0	4	0	0
chr13	55625954	+	A	chr13:55625954	Caml	SINE	Intron	intron_variant	0	0	55626622	668	downstream	intronic	0	<0.001	<0.001	---	|	0.993865	0.0045	0.00226	0.506	|	0	4	0	0	3	0	0	5	0	0	6	0	0	13	0	0	3	0	0	7	0	0	4	0	0
chr13	55626261	+	A	chr13:55626261	Caml	SINE	Intron	intron_variant	0	0	55626721	460	downstream	intronic	4.55015	0.0234	<0.001	0.0259	|	3.78131	0.351	0.0255	0.136	|	0	21	0	3	21	0.142857	0	9	0	1	16	0.0625	0	27	0	1	9	0.111111	0	22	0	1	6	0.166667	0
chr13	55626291	+	A	chr13:55626291	Caml	SINE	Intron	intron_variant	0	0	-	-	-	-	3.30701	0.0099	<0.001	0.0814	|	4.3282	0.267	0.0133	0.0538	|	0	24	0	1	19	0.0526316	0	7	0	1	16	0.0625	0	18	0	0	10	0	0	19	0	2	7	0.285714	0
chr13	55626301	+	A	chr13:55626301	Caml	SINE	Intron	intron_variant	0	0	55626683	382	downstream	intronic	3.2751	0.00968	<0.001	0.0795	|	3.89924	0.0917	0.00615	0.0332	|	0	23	0	1	18	0.0555556	0	4	0	1	15	0.0666667	0	21	0	0	9	0	0	18	0	2	9	0.222222	0
chr13	55626306	+	A	chr13:55626306	Caml	SINE	Intron	intron_variant	0	0	55626677	371	downstream	intronic	2.45046	0.00547	<0.001	0.183	|	3.77201	0.0798	0.00584	0.0744	|	0	23	0	1	15	0.0666667	0	4	0	0	13	0	0	21	0	0	9	0	0	18	0	2	5	0.4	0
chr13	55626321	+	A	chr13:55626321	Caml	SINE	Intron	intron_variant	0	0	55626662	341	downstream	intronic	3.36615	0.0103	<0.001	0.0792	|	5.64328	0.11	0.00221	0.0153	|	0	20	0	1	16	0.0625	0	7	0	1	13	0.0769231	0	19	0	0	9	0	0	19	0	2	8	0.25	0
chr13	55626328	+	A	chr13:55626328	Caml	SINE	Intron	intron_variant	0	0	55626655	327	downstream	intronic	0.742998	0.00472	0.00282	0.766	|	2.37411	0.29	0.056	0.147	|	0	20	0	0	15	0	0	6	0	1	13	0.0769231	0	18	0	0	9	0	0	19	0	1	7	0.142857	0
chr13	55626329	+	A	chr13:55626329	Caml	SINE	Intron	intron_variant	0	0	55626654	325	downstream	intronic	1.19307	0.00229	<0.001	0.363	|	3.89764	0.198	0.0133	0.0726	|	0	19	0	0	15	0	0	6	0	0	13	0	0	18	0	0	9	0	0	19	0	1	7	0.142857	0
chr13	55626335	+	A	chr13:55626335	Caml	SINE	Intron	intron_variant	0	0	55626649	314	downstream	intronic	2.14605	0.00443	<0.001	0.178	|	3.25463	0.125	0.0131	0.0432	|	0	21	0	1	19	0.0526316	0	6	0	0	12	0	0	18	0	0	8	0	0	19	0	1	7	0.142857	0
chr13	55630149	+	A	chr13:55630149	Caml,Ddx46	SINE	Intron	non_coding_transcript_variant	0	0	-	-	-	-	-0.189584	0.00238	0.00271	0.931	|	3.77269	0.618	0.0452	0.0476	|	0	1	0	2	11	0.181818	0	8	0	0	7	0	0	8	0	0	14	0	0	0	---	0	7	0	0
chr13	56086759	-	T	chr13:56086759	AC164426.2,H2afy	.	Intron	non_coding_transcript_variant	0	0	-	-	-	-	0	<0.001	<0.001	---	|	3.18618	0.0798	0.00876	0.118	|	0	83	0	0	50	0	0	77	0	0	26	0	0	109	0	0	42	0	0	36	0	0	2	0	0
chr13	56092065	-	T	chr13:56092065	H2afy	.	Intron	intron_variant	1	1	-	-	-	-	0	<0.001	<0.001	---	|	5.11525	0.0347	<0.001	0.0171	|	0	105	0	0	65	0	0	43	0	0	52	0	0	73	0	0	44	0	0	27	0	0	7	0	0
chr13	56289463	-	T	chr13:56289463	Cxcl14	.	UTR	3_prime_UTR_variant	0	0	-	-	-	-	-0.907037	<0.001	0.00188	0.363	|	-0.209978	0.0195	0.0225	0.902	|	0	9	0	0	9	0	0	8	0	0	11	0	1	23	0.0434783	0	17	0	0	9	0	0	3	0	0
chr13	58166503	+	A	chr13:58166503	Idnk	.	intergenic	downstream_gene_variant	1	1	-	-	-	-	-5.9287	<0.001	0.0609	0.00519	|	0.278044	0.547	0.451	0.0241	|	3	29	0.103448	0	1	0	3	15	0.2	0	1	0	2	24	0.0833333	0	11	0	0	8	0	0	2	0	8
chr13	58167070	+	A	chr13:58167070	Idnk	SINE	intergenic	downstream_gene_variant	0	0	58167789	719	downstream	undefined	0	<0.001	<0.001	---	|	-3.54027	<0.001	0.0116	0.0715	|	0	10	0	0	0	---	0	9	0	0	0	---	0	9	0	0	6	0	0	14	0	0	0	---	0
chr13	58167087	+	A	chr13:58167087	Idnk	SINE	intergenic	downstream_gene_variant	0	0	58167772	685	downstream	undefined	-2.60769	<0.001	0.0061	0.176	|	-0.571309	0.23	0.342	0.446	|	0	10	0	0	0	---	0	8	0	0	0	---	0	9	0	0	7	0	2	13	0.153846	0	0	---	0
chr13	58167101	+	A	chr13:58167101	Idnk	SINE	intergenic	downstream_gene_variant	0	0	58167758	657	downstream	undefined	0	<0.001	<0.001	---	|	-0.799398	0.199	0.347	0.226	|	0	12	0	0	0	---	0	9	0	0	0	---	0	11	0	0	6	0	0	12	0	0	0	---	0
chr13	58167172	+	A	chr13:58167172	Idnk	SINE	intergenic	downstream_gene_variant	0	0	58165488	1684	upstream	undefined	-1.19307	<0.001	0.00229	0.363	|	-2.51672	0.00257	0.0147	0.396	|	0	13	0	0	1	0	0	11	0	0	0	---	2	14	0.142857	0	6	0	0	18	0	0	0	---	0
chr13	58167182	+	A	chr13:58167182	Idnk	SINE	intergenic	downstream_gene_variant	0	0	58165478	1704	upstream	undefined	-1.32763	<0.001	0.00251	0.363	|	-2.85396	0.0082	0.0593	0.391	|	0	11	0	0	1	0	0	5	0	0	2	0	0	14	0	0	5	0	0	16	0	0	3	0	0
chr13	59756306	-	T	chr13:59756306	AC134869.3,Isca1	.	UTR	3_prime_UTR_variant	0	0	-	-	-	-	0.107055	0.0215	0.02	0.588	|	0.330373	0.00156	0.00124	0.635	|	9	849	0.0106007	11	1198	0.00918197	23	1346	0.0170877	21	1885	0.0111406	22	1337	0.0164547	36	1902	0.0189274	102	4430	0.0230248	159	4313	0.0368653	115
chr13	59819739	-	T	chr13:59819739	AC125350.2,Zcchc6	SINE	Intron	regulatory_region_variant	0	0	-	-	-	-	0.714981	0.00832	0.00507	0.538	|	1.18868	0.00228	<0.001	0.374	|	0	111	0	5	782	0.00639386	0	84	0	0	532	0	4	112	0.0357143	3	663	0.00452489	2	126	0.015873	2	248	0.00806452	2
chr13	59819826	-	T	chr13:59819826	AC125350.2,Zcchc6	SINE	Intron	regulatory_region_variant	0	0	-	-	-	-	-0.726376	0.0632	0.105	0.0382	|	0.420072	0.00844	0.00631	0.863	|	5	60	0.0833333	21	524	0.0400763	6	63	0.0952381	16	398	0.040201	10	105	0.0952381	17	457	0.0371991	12	118	0.101695	19	239	0.0794979	16
chr13	60734688	+	A	chr13:60734688	Dapk1	SINE	Intron	intron_variant	0	0	-	-	-	-	0	<0.001	<0.001	---	|	-0.354628	0.0433	0.0554	0.847	|	0	4	0	0	2	0	0	1	0	0	0	---	0	6	0	0	1	0	0	8	0	0	0	---	0
chr13	60734689	+	A	chr13:60734689	Dapk1	SINE	Intron	intron_variant	0	0	-	-	-	-	0	<0.001	<0.001	---	|	3.11834	0.0251	0.00289	0.183	|	0	5	0	0	2	0	0	1	0	0	0	---	0	6	0	0	1	0	0	8	0	0	0	---	0
chr13	60734742	+	A	chr13:60734742	Dapk1	SINE	Intron	intron_variant	0	0	-	-	-	-	1.66096	0.00316	<0.001	0.363	|	6.11033	0.0691	<0.001	0.0171	|	0	6	0	0	2	0	0	1	0	0	1	0	0	9	0	2	2	1	0	0	---	0	0	---	0
chr13	60735568	+	A	chr13:60735568	Dapk1	SINE	Intron	intron_variant	0	0	-	-	-	-	0	<0.001	<0.001	---	|	-1.62852	0.0148	0.0458	0.361	|	0	6	0	0	2	0	0	11	0	0	0	---	0	5	0	0	4	0	0	2	0	0	0	---	0
chr13	62673241	-	T	chr13:62673241	CT030185.2,Platr25	Unknown	Exon	synonymous_variant	0	0	-	-	-	-	0	<0.001	<0.001	---	|	0.00461672	0.002	0.002	0.998	|	0	39	0	0	2	0	0	30	0	0	15	0	0	27	0	0	19	0	0	14	0	0	9	0	0
chr13	62772983	-	T	chr13:62772983	Gm5141	.	UTR	3_prime_UTR_variant	0	0	-	-	-	-	0	<0.001	<0.001	---	|	0.738232	0.00839	0.00503	0.266	|	0	10	0	---	---	---	0	9	0	---	---	---	0	5	0	0	0	---	0	16	0	0	8	0	0
chr13	63814094	-	T	chr13:63814094	Ercc6l2	SINE	intergenic	upstream_gene_variant	0	0	-	-	-	-	0	<0.001	<0.001	---	|	1.53741	0.341	0.117	0.424	|	0	2	0	0	3	0	---	---	---	---	---	---	0	5	0	---	---	---	---	---	---	0	3	0	0
chr13	63814103	-	T	chr13:63814103	Ercc6l2	SINE	intergenic	upstream_gene_variant	0	0	-	-	-	-	0	<0.001	<0.001	---	|	3.48694	0.0253	0.00226	0.139	|	0	2	0	0	4	0	---	---	---	---	---	---	0	6	0	---	---	---	---	---	---	0	3	0	0
chr13	64290161	-	T	chr13:64290161	Aaed1,CT030159.3	SINE	UTR	3_prime_UTR_variant	0	0	64291049	888	upstream	UTR	-3.81943	<0.001	0.0141	0.00448	|	2.79547	0.00694	<0.001	0.183	|	7	195	0.0358974	0	9	0	3	155	0.0193548	0	7	0	3	179	0.0167598	0	2	0	0	180	0	0	5	0	2
chr13	64290180	-	T	chr13:64290180	Aaed1,CT030159.3	SINE	UTR	3_prime_UTR_variant	1	1	64291032	852	upstream	UTR	-1.05588	0.138	0.286	0.509	|	0.645477	0.084	0.0537	0.803	|	58	182	0.318681	5	8	0.625	39	156	0.25	2	4	0.5	39	179	0.217877	1	2	0.5	42	146	0.287671	0	5	0	29
chr13	64290310	-	T	chr13:64290310	Aaed1,CT030159.3	SINE	UTR	3_prime_UTR_variant	1	1	-	-	-	-	-4.49849	0.0182	0.412	0.0636	|	1.18334	0.477	0.21	0.0887	|	58	137	0.423358	2	7	0.285714	94	172	0.546512	0	2	0	82	195	0.420513	5	7	0.714286	54	138	0.391304	5	28	0.178571	23
chr13	64290358	-	T	chr13:64290358	Aaed1,CT030159.3	SINE	UTR	3_prime_UTR_variant	1	1	-	-	-	-	-5.22811	<0.001	0.0375	0.00527	|	1.33605	0.0133	0.00528	0.261	|	14	115	0.121739	0	7	0	16	147	0.108844	0	2	0	16	186	0.0860215	0	4	0	11	102	0.107843	0	21	0	0
chr13	64366645	-	T	chr13:64366645	CT030159.2,CT030159.4,Ctsl	.	Intron	splice_region_variant	0	0	-	-	-	-	-0.0680925	0.0147	0.0154	0.981	|	0.145331	0.135	0.122	0.93	|	1	6	0.166667	1	53	0.0188679	0	6	0	0	35	0	1	10	0.1	1	46	0.0217391	0	7	0	6	14	0.428571	4
chr13	67473022	-	T	chr13:67473022	AC154510.1,Zfp874b	.	UTR	3_prime_UTR_variant	0	0	67473456	434	upstream	UTR	1.72962	0.0217	0.00654	0.408	|	0	<0.001	<0.001	---	|	1	20	0.05	3	19	0.157895	0	37	0	5	39	0.128205	0	22	0	1	19	0.0526316	1	48	0.0208333	4	41	0.097561	0
chr13	67473025	-	T	chr13:67473025	AC154510.1,Zfp874b	.	UTR	3_prime_UTR_variant	0	0	67473456	431	upstream	UTR	-2.94259	0.00811	0.0624	0.0913	|	1.67616	0.0032	<0.001	0.374	|	1	19	0.0526316	0	19	0	2	38	0.0526316	2	36	0.0555556	1	23	0.0434783	2	19	0.105263	4	42	0.0952381	2	41	0.0487805	4
chr13	67473034	-	T	chr13:67473034	AC154510.1,Zfp874b	SINE	UTR	3_prime_UTR_variant	0	0	67473447	413	upstream	UTR	0.549382	0.0929	0.0635	0.38	|	1.72877	0.00331	<0.001	0.374	|	0	9	0	0	10	0	2	30	0.0666667	6	20	0.3	2	18	0.111111	4	13	0.307692	13	54	0.240741	8	36	0.222222	7
chr13	67473036	-	T	chr13:67473036	AC154510.1,Zfp874b	SINE	UTR	3_prime_UTR_variant	0	0	67473445	409	upstream	UTR	0.508367	0.0216	0.0152	0.789	|	0	<0.001	<0.001	---	|	1	8	0.125	0	10	0	1	30	0.0333333	2	19	0.105263	1	19	0.0526316	1	13	0.0769231	3	53	0.0566038	4	36	0.111111	0
chr13	67473062	-	T	chr13:67473062	AC154510.1,Zfp874b	SINE	UTR	3_prime_UTR_variant	0	0	67473418	356	upstream	UTR	-0.184776	0.264	0.3	0.731	|	-2.79809	0.00956	0.0665	0.274	|	3	9	0.333333	5	9	0.555556	7	28	0.25	3	17	0.176471	4	18	0.222222	4	14	0.285714	15	42	0.357143	13	27	0.481481	13
chr13	67473078	-	T	chr13:67473078	AC154510.1,Zfp874b	SINE	UTR	3_prime_UTR_variant	0	0	67473401	323	upstream	UTR	3.56078	0.0524	0.00444	0.0628	|	0	<0.001	<0.001	---	|	0	9	0	2	7	0.285714	1	25	0.04	1	13	0.0769231	0	18	0	0	9	0	0	43	0	4	28	0.142857	9
chr13	67473081	-	T	chr13:67473081	AC154510.1,Zfp874b	SINE	UTR	3_prime_UTR_variant	0	0	67473399	318	upstream	UTR	-0.500153	0.0124	0.0175	0.824	|	-2.95233	<0.001	0.00774	0.183	|	0	9	0	2	7	0.285714	1	25	0.04	0	12	0	0	18	0	0	9	0	2	43	0.0465116	1	28	0.0357143	9
chr13	67473084	-	T	chr13:67473084	AC154510.1,Zfp874b	SINE	UTR	3_prime_UTR_variant	0	0	67473396	312	upstream	UTR	-0.335731	0.231	0.291	0.415	|	-5.13371	0.0031	0.109	0.0721	|	3	9	0.333333	3	6	0.5	6	25	0.24	1	14	0.0714286	3	18	0.166667	1	9	0.111111	15	43	0.348837	5	27	0.185185	25
chr13	67473086	-	T	chr13:67473086	AC154510.1,Zfp874b	SINE	UTR	3_prime_UTR_variant	0	0	67473394	308	upstream	UTR	0.748545	0.0258	0.0153	0.671	|	-1.67616	<0.001	0.0032	0.374	|	0	10	0	1	6	0.166667	1	25	0.04	0	14	0	0	16	0	0	9	0	2	43	0.0465116	2	27	0.0740741	12
chr13	67473137	-	T	chr13:67473137	AC154510.1,Zfp874b	SINE	UTR	splice_donor_variant	0	0	67473344	207	upstream	UTR	2.7053	0.051	0.00781	0.195	|	0	<0.001	<0.001	---	|	3	29	0.103448	4	14	0.285714	0	21	0	1	24	0.0416667	0	23	0	2	26	0.0769231	0	68	0	6	56	0.107143	5
chr13	67473140	-	T	chr13:67473140	AC154510.1,Zfp874b	SINE	UTR	splice_region_variant	0	0	67473340	200	upstream	UTR	1.05698	0.0113	0.00543	0.606	|	-1.35917	<0.001	0.00257	0.374	|	0	36	0	2	17	0.117647	1	23	0.0434783	0	28	0	0	27	0	2	29	0.0689655	0	72	0	0	57	0	1
chr13	67473146	-	T	chr13:67473146	AC154510.1,Zfp874b	SINE	UTR	3_prime_UTR_variant	1	1	67473334	188	upstream	UTR	0.396473	0.434	0.329	0.252	|	-3.33891	0.0564	0.571	0.217	|	13	40	0.325	10	20	0.5	8	32	0.25	10	33	0.30303	5	35	0.142857	16	34	0.470588	24	77	0.311688	12	56	0.214286	54
chr13	67473152	-	T	chr13:67473152	AC154510.1,Zfp874b	SINE	UTR	3_prime_UTR_variant	0	0	67473328	176	upstream	UTR	0.236789	0.282	0.239	0.739	|	-0.981378	0.0158	0.0313	0.789	|	14	49	0.285714	9	20	0.45	3	33	0.0909091	11	37	0.297297	5	36	0.138889	16	38	0.421053	10	66	0.151515	8	57	0.140351	43
chr13	67473168	-	T	chr13:67473168	AC154510.1,Zfp874b	SINE	UTR	3_prime_UTR_variant	0	0	-	-	-	-	0.0527859	0.139	0.134	0.926	|	-1.15917	<0.001	0.00223	0.374	|	12	93	0.129032	14	51	0.27451	10	69	0.144928	9	52	0.173077	6	64	0.09375	12	61	0.196721	3	58	0.0517241	6	71	0.084507	21
chr13	67473336	-	T	chr13:67473336	AC154510.1,Zfp874b	SINE	UTR	3_prime_UTR_variant	0	0	67473144	192	downstream	UTR	-0.924375	0.106	0.201	0.209	|	1.99316	0.00398	<0.001	0.374	|	8	55	0.145455	3	55	0.0545455	13	71	0.183099	11	67	0.164179	10	82	0.121951	6	31	0.193548	19	89	0.213483	1	59	0.0169492	14
chr13	67473370	-	T	chr13:67473370	AC154510.1,Zfp874b	SINE	UTR	3_prime_UTR_variant	0	0	67473110	260	downstream	UTR	-1.08475	0.0639	0.135	0.353	|	0	<0.001	<0.001	---	|	1	23	0.0434783	0	33	0	5	36	0.138889	13	37	0.351351	11	46	0.23913	2	16	0.125	8	61	0.131148	1	51	0.0196078	5
chr13	67473371	-	T	chr13:67473371	AC154510.1,Zfp874b	SINE	UTR	3_prime_UTR_variant	0	0	67473109	262	downstream	UTR	-0.945597	0.0538	0.104	0.515	|	0.316993	0.00398	0.0032	0.374	|	2	23	0.0869565	0	32	0	5	36	0.138889	7	38	0.184211	10	47	0.212766	2	17	0.117647	9	61	0.147541	1	51	0.0196078	1
chr13	67473391	-	T	chr13:67473391	AC154510.1,Zfp874b	SINE	UTR	3_prime_UTR_variant	0	0	67473089	302	downstream	UTR	-0.568013	0.0123	0.0183	0.8	|	0	<0.001	<0.001	---	|	0	19	0	0	19	0	1	21	0.047619	1	22	0.0454545	2	23	0.0869565	0	6	0	3	43	0.0697674	0	41	0	0
chr13	67658850	-	T	chr13:67658850	CT030194.1,Gm26587,Zfp738	LINE	UTR	3_prime_UTR_variant	0	0	-	-	-	-	-3.55398	<0.001	0.0117	0.0801	|	-1.37177	0.0212	0.0548	0.377	|	0	10	0	0	7	0	0	16	0	0	4	0	0	18	0	0	5	0	6	25	0.24	0	8	0	7
chr13	67658857	-	T	chr13:67658857	CT030194.1,Gm26587,Zfp738	LINE	UTR	3_prime_UTR_variant	0	0	-	-	-	-	-2.05037	<0.001	0.00414	0.176	|	1.79717	0.0671	0.0193	0.559	|	0	10	0	0	7	0	1	18	0.0555556	0	6	0	0	19	0	0	5	0	0	31	0	0	8	0	3
chr13	67658869	-	T	chr13:67658869	CT030194.1,Gm26587,Zfp738	LINE	UTR	3_prime_UTR_variant	0	0	-	-	-	-	0	<0.001	<0.001	---	|	5.08621	0.075	0.00221	0.0302	|	0	12	0	0	7	0	0	21	0	0	5	0	0	17	0	0	5	0	0	38	0	0	12	0	0
chr13	67658884	-	T	chr13:67658884	CT030194.1,Gm26587,Zfp738	LINE	UTR	3_prime_UTR_variant	0	0	-	-	-	-	-4.38946	<0.001	0.021	0.0266	|	3.51874	0.203	0.0177	0.135	|	0	16	0	0	7	0	1	23	0.0434783	0	5	0	0	20	0	0	6	0	4	38	0.105263	0	12	0	9
chr13	67658905	-	T	chr13:67658905	CT030194.1,Gm26587,Zfp738	LINE	UTR	3_prime_UTR_variant	0	0	-	-	-	-	-0.688816	<0.001	0.00161	0.363	|	1.93465	0.0185	0.00485	0.288	|	0	13	0	0	8	0	0	26	0	0	4	0	0	23	0	0	6	0	0	37	0	0	22	0	1
chr13	67658911	-	T	chr13:67658911	CT030194.1,Gm26587,Zfp738	LINE	UTR	3_prime_UTR_variant	0	0	-	-	-	-	-6.22679	<0.001	0.0749	7.87e-06	|	-0.145311	0.044	0.0486	0.628	|	1	15	0.0666667	0	8	0	3	26	0.115385	0	6	0	2	24	0.0833333	0	6	0	2	37	0.0540541	0	21	0	9
chr13	67658919	-	T	chr13:67658919	CT030194.1,Gm26587,Zfp738	LINE	UTR	3_prime_UTR_variant	0	0	-	-	-	-	-4.2068	<0.001	0.0185	0.0282	|	-0.895245	0.00847	0.0157	0.746	|	0	13	0	0	8	0	0	22	0	0	6	0	2	23	0.0869565	0	5	0	2	33	0.0606061	0	20	0	12
chr13	67658921	-	T	chr13:67658921	CT030194.1,Gm26587,Zfp738	LINE	UTR	3_prime_UTR_variant	0	0	-	-	-	-	-5.25093	<0.001	0.0381	0.00452	|	1.76542	0.0561	0.0165	0.281	|	1	11	0.0909091	0	9	0	2	20	0.1	0	5	0	1	23	0.0434783	0	5	0	2	33	0.0606061	0	20	0	7
chr13	67658924	-	T	chr13:67658924	CT030194.1,Gm26587,Zfp738	LINE	UTR	3_prime_UTR_variant	0	0	-	-	-	-	-5.68459	<0.001	0.0514	0.00469	|	-0.112162	0.0177	0.0191	0.976	|	0	11	0	0	9	0	2	19	0.105263	0	6	0	1	21	0.047619	0	5	0	7	37	0.189189	0	20	0	6
chr13	67658927	-	T	chr13:67658927	CT030194.1,Gm26587,Zfp738	LINE	UTR	3_prime_UTR_variant	0	0	-	-	-	-	-7.17596	<0.001	0.145	5.92e-06	|	1.50222	0.444	0.157	0.0293	|	1	10	0.1	0	9	0	3	16	0.1875	0	6	0	1	20	0.05	0	5	0	7	36	0.194444	0	18	0	13
chr13	67658934	-	T	chr13:67658934	CT030194.1,Gm26587,Zfp738	LINE	UTR	3_prime_UTR_variant	0	0	-	-	-	-	-5.47887	0.00229	0.102	0.00486	|	2.17302	0.401	0.0889	0.265	|	2	13	0.153846	0	8	0	3	16	0.1875	1	7	0.142857	1	22	0.0454545	0	4	0	1	40	0.025	0	18	0	14
chr13	67658949	-	T	chr13:67658949	CT030194.1,Gm26587,Zfp738	LINE	UTR	3_prime_UTR_variant	0	0	-	-	-	-	-3.23359	0.00472	0.0444	0.128	|	1.92666	0.217	0.0571	0.272	|	3	16	0.1875	0	8	0	1	17	0.0588235	0	7	0	1	25	0.04	1	9	0.111111	3	43	0.0697674	2	20	0.1	12
chr13	67658959	-	T	chr13:67658959	CT030194.1,Gm26587,Zfp738	LINE	UTR	3_prime_UTR_variant	0	0	-	-	-	-	-3.16397	0.00513	0.046	0.255	|	-0.509586	0.0075	0.0107	0.854	|	4	19	0.210526	0	5	0	1	16	0.0625	0	9	0	0	22	0	1	10	0.1	2	44	0.0454545	4	22	0.181818	10
chr13	67658968	-	T	chr13:67658968	CT030194.1,Gm26587,Zfp738	LINE	UTR	splice_region_variant	0	0	-	-	-	-	-4.94554	<0.001	0.0308	0.00475	|	-2.30656	0.00291	0.0144	0.46	|	2	18	0.111111	0	5	0	0	17	0	0	10	0	1	26	0.0384615	0	9	0	2	58	0.0344828	0	22	0	4
chr13	67666220	-	T	chr13:67666220	CT030194.1,Gm26587,Zfp738	LINE	UTR	3_prime_UTR_variant	0	0	-	-	-	-	0	<0.001	<0.001	---	|	0.529421	0.0575	0.0398	0.833	|	0	10	0	0	3	0	0	2	0	0	0	---	0	14	0	0	0	---	0	16	0	0	2	0	0
chr13	67666227	-	T	chr13:67666227	CT030194.1,Gm26587,Zfp738	LINE	UTR	3_prime_UTR_variant	0	0	-	-	-	-	-1.37756	<0.001	0.0026	0.363	|	0.877178	0.29	0.158	0.0308	|	0	10	0	0	3	0	0	2	0	0	0	---	0	12	0	0	0	---	0	16	0	0	1	0	0
chr13	67666450	-	T	chr13:67666450	CT030194.1,Zfp738	LINE	UTR	3_prime_UTR_variant	0	0	-	-	-	-	-6.51593	0.00296	0.27	0.0134	|	-2.79507	0.00515	0.0357	0.19	|	5	19	0.263158	0	1	0	3	16	0.1875	2	3	0.666667	1	14	0.0714286	0	4	0	4	12	0.333333	0	0	---	1
chr13	67669337	-	T	chr13:67669337	CT030194.1,Zfp738	Satellite	UTR	3_prime_UTR_variant	0	0	-	-	-	-	3.83775	0.0143	<0.001	0.0424	|	-0.0933136	0.00167	0.00179	0.944	|	0	39	0	1	42	0.0238095	0	25	0	1	38	0.0263158	0	48	0	1	44	0.0227273	0	18	0	0	11	0	0
chr13	74360288	+	A	chr13:74360288	Ccdc127,Lrrc14b	SINE	UTR	3_prime_UTR_variant	0	0	-	-	-	-	-1.66096	<0.001	0.00316	0.363	|	0.421624	0.143	0.107	0.499	|	0	3	0	0	2	0	0	0	---	0	2	0	0	5	0	0	9	0	0	0	---	0	0	---	5
chr13	74360290	+	A	chr13:74360290	Ccdc127,Lrrc14b	SINE	UTR	3_prime_UTR_variant	0	0	-	-	-	-	0	<0.001	<0.001	---	|	2.1685	0.0269	0.00598	0.46	|	0	3	0	0	2	0	0	0	---	0	2	0	0	5	0	0	9	0	0	0	---	0	0	---	0
chr13	74447393	-	T	chr13:74447393	CT009718.1	Satellite	intergenic	non_coding_transcript_exon_variant	0	0	-	-	-	-	-2.33745	<0.001	0.00505	0.175	|	-3.34492	0.00179	0.0181	0.0364	|	0	19	0	0	2	0	1	10	0.1	0	0	---	0	18	0	0	3	0	2	12	0.166667	0	0	---	0
chr13	75999610	-	T	chr13:75999610	Rfesd,Spata9	SINE	intergenic	downstream_gene_variant	1	1	-	-	-	-	4.98289	0.0316	<0.001	0.5	|	-1.93574	0.00569	0.0218	0.458	|	0	5	0	1	1	1	3	7	0.428571	---	---	---	0	8	0	0	0	---	---	---	---	0	2	0	---
chr13	75999622	-	T	chr13:75999622	Rfesd,Spata9	SINE	intergenic	downstream_gene_variant	1	1	75999809	187	upstream	undefined	0	<0.001	<0.001	---	|	0.339487	0.00267	0.00211	0.872	|	0	3	0	0	1	0	1	7	0.142857	---	---	---	0	4	0	0	0	---	---	---	---	0	0	---	---
chr13	93147184	-	T	chr13:93147184	Cmya5,Papd4	.	UTR	3_prime_UTR_variant	0	0	-	-	-	-	-4.02106	<0.001	0.0162	0.00665	|	-1.24445	0.00609	0.0144	0.214	|	2	86	0.0232558	0	13	0	3	59	0.0508475	0	9	0	1	82	0.0121951	0	23	0	11	142	0.0774648	0	27	0	1
chr13	93942286	+	A	chr13:93942286	Arsb,Gm26527	.	UTR	3_prime_UTR_variant	0	0	-	-	-	-	-2.10814	0.002	0.00864	0.0941	|	-0.723175	0.0134	0.0222	0.492	|	4	399	0.0100251	0	207	0	4	372	0.0107527	2	180	0.0111111	2	397	0.00503778	1	172	0.00581395	4	238	0.0168067	0	58	0	0
chr13	93942552	+	A	chr13:93942552	Arsb,Gm26527	.	UTR	3_prime_UTR_variant	0	0	-	-	-	-	0.0361887	0.00136	0.00133	0.363	|	-0.87891	0.0075	0.0138	0.568	|	0	396	0	0	169	0	0	364	0	0	183	0	2	365	0.00547945	1	157	0.00636943	0	256	0	0	105	0	0
chr13	94841002	+	A	chr13:94841002	Tbca	SINE	Intron	non_coding_transcript_variant	0	0	-	-	-	-	1.23014	0.00235	<0.001	0.363	|	-0.856257	0.0703	0.127	0.748	|	0	4	0	1	6	0.166667	0	1	0	0	5	0	0	9	0	0	8	0	0	0	---	0	0	---	0
chr13	97128084	+	A	chr13:97128084	Fam169a,Nsa2	SINE	UTR	3_prime_UTR_variant	0	0	-	-	-	-	0	<0.001	<0.001	---	|	-0.113447	0.0243	0.0263	0.933	|	---	---	---	0	4	0	---	---	---	0	2	0	0	1	0	0	1	0	0	5	0	0	2	0	0
chr13	97128117	+	A	chr13:97128117	Fam169a,Nsa2	SINE	UTR	3_prime_UTR_variant	0	0	-	-	-	-	0	<0.001	<0.001	---	|	0.112845	0.0236	0.0218	0.942	|	---	---	---	0	4	0	---	---	---	0	2	0	0	2	0	---	---	---	---	---	---	0	2	0	0
chr13	97128125	+	A	chr13:97128125	Fam169a,Nsa2	SINE	UTR	3_prime_UTR_variant	1	1	-	-	-	-	0	<0.001	<0.001	---	|	-3.09974	<0.001	0.00857	0.0204	|	---	---	---	0	2	0	---	---	---	0	2	0	0	2	0	---	---	---	---	---	---	0	2	0	0
chr13	97128170	+	A	chr13:97128170	Fam169a,Nsa2	SINE	UTR	3_prime_UTR_variant	0	0	-	-	-	-	0	<0.001	<0.001	---	|	-1.21502	0.0237	0.0551	0.396	|	---	---	---	0	3	0	---	---	---	0	4	0	0	2	0	---	---	---	---	---	---	0	2	0	0
chr13	97128171	+	A	chr13:97128171	Fam169a,Nsa2	SINE	UTR	3_prime_UTR_variant	0	0	-	-	-	-	0	<0.001	<0.001	---	|	1.69222	0.0282	0.00872	0.35	|	---	---	---	0	3	0	---	---	---	0	4	0	0	2	0	---	---	---	---	---	---	0	2	0	0
chr13	97157261	+	A	chr13:97157261	Gfm2	SINE	Intron	non_coding_transcript_variant	1	1	-	-	-	-	-1.3968	<0.001	0.00263	0.363	|	0.460364	0.665	0.483	0.0196	|	0	8	0	0	0	---	0	2	0	0	0	---	0	5	0	0	1	0	1	3	0.333333	0	1	0	0
[truncated: 5,902 more rows]
[truncated: 42 more columns]

## Sheet: README
Supplemental Table S6: Editing sites detected in bone marrow and primary neuronal cultures. Either bone marrow cells or primary neurons were treated with the splicing inhibitor meayamycin (MEA) or vehicle control (DMSO). RNA was isolated after treatment and poly(A)-selected RNA was subjected to Illumina sequencing. The reads were mapped to the mouse genome (mm10) and the editing level of known ed…
[truncated: 32 more rows]
