# Supplementary material for: A high resolution A-to-I editing map in the mouse identifies editing events controlled by pre-mRNA splicing
Source: Genome Res. 2019 Sep;29(9):1453–63. doi: 10.1101/gr.242636.118 (PMC6724681; doi:10.1101/gr.242636.118)
Supplement: Supplemental Material [file supp_gr.242636.118_Supplemental_Table_S7.xlsx]

## Sheet: Nova1 and Nova2
chromosome	position	strand	referenceBase	id	gene_name(s)	repeatType	genome_annotation	VEP_annotation	radar	darned	ECS_position	ECS_distance	ECS_orientation	ECS_annotation	nova1_stats_LFC	nova1_stats_gmean_dNova1	nova1_stats_gmean_WT	nova1_stats_p-value_Welch_log	|	nova2_stats_LFC	nova2_stats_gmean_dNova1	nova2_stats_gmean_WT	nova2_stats_p-value_Welch_log	|	nova1_editedReadCountWT.rep1	nova1_totalReadCountWT.rep1	nova1_editingLevelWT.rep1	nova1_editedReadCountWT.rep2	nova1_totalReadCountWT.rep2	nova1_editingLevelWT.rep2	nova1_editedReadCountWT.rep3	nova1_totalReadCountWT.rep3	nova1_editingLevelWT.rep3	nova1_editedReadCountKO.rep1	nova1_totalReadCountKO.rep1	nova1_editingLevelKO.rep1	nova1_editedReadCountKO.rep2	nova1_totalReadCountKO.rep2	nova1_editingLevelKO.rep2	nova1_editedReadCountKO.rep3	nova1_totalReadCountKO.rep3	nova1_editingLevelKO.rep3	|	nova2_editedReadCountWT.rep1	nova2_totalReadCountWT.rep1	nova2_editingLevelWT.rep1	nova2_editedReadCountWT.rep2	nova2_totalReadCountWT.rep2	nova2_editingLevelWT.rep2
chr1	3262043	-	T	chr1:3262043	Xkr4	LINE	Intron	intron_variant	0	0	-	-	-	-	0.212477	0.00382	0.00329	0.939	|	2.04712	0.0158	0.00382	0.501	|	0	14	0	0	17	0	1	28	0.0357143	0	21	0	1	18	0.0555556	0	8	0	|	0	15	0	0	6	0
chr1	3262047	-	T	chr1:3262047	Xkr4	LINE	Intron	intron_variant	0	0	-	-	-	-	3.66727	0.0611	0.00481	0.246	|	-0.471679	0.00368	0.00511	0.884	|	0	15	0	0	21	0	3	27	0.111111	1	21	0.047619	1	19	0.0526316	1	11	0.0909091	|	2	15	0.133333	0	6	0
chr1	3262063	-	T	chr1:3262063	Xkr4	LINE	Intron	intron_variant	0	0	-	-	-	-	2.30799	0.12	0.0242	0.421	|	1.95119	0.09	0.0233	0.49	|	0	16	0	2	17	0.117647	3	25	0.12	3	20	0.15	4	25	0.16	1	14	0.0714286	|	3	17	0.176471	0	9	0
chr1	3262456	-	T	chr1:3262456	Xkr4	LINE	Intron	intron_variant	0	0	-	-	-	-	-2.4643	0.0437	0.241	0.462	|	5.92055	0.0606	0.001	0.184	|	3	9	0.333333	1	7	0.142857	5	17	0.294118	0	5	0	5	15	0.333333	2	8	0.25	|	0	5	0	0	8	0
chr1	3262535	-	T	chr1:3262535	Xkr4	LINE	Intron	intron_variant	0	0	3264268	1733	upstream	intronic	0.616158	0.39	0.255	0.45	|	1.42699	0.33	0.123	0.0723	|	4	12	0.333333	4	11	0.363636	3	22	0.136364	2	6	0.333333	3	14	0.214286	5	6	0.833333	|	1	6	0.166667	1	6	0.166667
chr1	3262548	-	T	chr1:3262548	Xkr4	LINE	Intron	intron_variant	0	0	3264255	1707	upstream	intronic	-1.04261	0.0306	0.063	0.715	|	0.0506677	0.00606	0.00585	0.99	|	1	14	0.0714286	1	11	0.0909091	1	26	0.0384615	1	7	0.142857	3	15	0.2	0	6	0	|	0	7	0	1	5	0.2
chr1	3262571	-	T	chr1:3262571	Xkr4	LINE	Intron	intron_variant	0	0	-	-	-	-	0.937966	0.104	0.0545	0.232	|	2.99195	0.0347	0.00437	0.421	|	1	13	0.0769231	1	14	0.0714286	1	34	0.0294118	1	11	0.0909091	1	16	0.0625	2	10	0.2	|	1	12	0.0833333	0	6	0
chr1	3262699	-	T	chr1:3262699	Xkr4	LINE	Intron	intron_variant	0	0	-	-	-	-	-2.2826	0.0518	0.252	0.508	|	0.0706991	0.289	0.275	0.813	|	5	13	0.384615	2	12	0.166667	7	28	0.25	6	15	0.4	8	23	0.347826	0	9	0	|	3	11	0.272727	2	9	0.222222
chr1	3262702	-	T	chr1:3262702	Xkr4	LINE	Intron	intron_variant	0	0	-	-	-	-	1.17684	0.174	0.0771	0.0928	|	2.43755	0.0217	0.00401	0.464	|	1	13	0.0769231	1	12	0.0833333	2	28	0.0714286	4	14	0.285714	4	24	0.166667	1	9	0.111111	|	0	13	0	0	10	0
chr1	3264251	-	T	chr1:3264251	Xkr4	LINE	Intron	intron_variant	0	0	3262552	1699	downstream	intronic	-0.482863	0.145	0.203	0.444	|	-2.46027	0.0327	0.18	0.447	|	2	18	0.111111	4	17	0.235294	8	25	0.32	4	29	0.137931	2	20	0.1	4	18	0.222222	|	4	9	0.444444	1	8	0.125
chr1	3264252	-	T	chr1:3264252	Xkr4	LINE	Intron	intron_variant	0	0	3262551	1701	downstream	intronic	-0.172993	0.19	0.214	0.769	|	-2.56758	0.0375	0.222	0.432	|	6	18	0.333333	3	17	0.176471	4	24	0.166667	3	29	0.103448	5	21	0.238095	5	18	0.277778	|	3	9	0.333333	2	8	0.25
chr1	3264372	-	T	chr1:3264372	Xkr4	LINE	Intron	intron_variant	0	0	-	-	-	-	1.02749	0.228	0.112	0.162	|	-0.174301	0.0245	0.0276	0.961	|	2	21	0.0952381	2	16	0.125	2	17	0.117647	6	17	0.352941	2	17	0.117647	4	14	0.285714	|	3	15	0.2	0	15	0
chr1	3264478	-	T	chr1:3264478	Xkr4	LINE	Intron	intron_variant	0	0	3262351	2127	downstream	intronic	1.82464	0.0162	0.00457	0.582	|	-2.26529	0.001	0.00481	0.423	|	2	21	0.0952381	0	28	0	0	33	0	1	35	0.0285714	4	27	0.148148	0	18	0	|	0	10	0	0	13	0
chr1	3264489	-	T	chr1:3264489	Xkr4	LINE	Intron	intron_variant	0	0	-	-	-	-	-2.61626	0.0187	0.115	0.369	|	-3.01432	0.017	0.137	0.284	|	3	20	0.15	3	28	0.107143	3	32	0.09375	1	34	0.0294118	6	27	0.222222	0	18	0	|	1	7	0.142857	1	13	0.0769231
chr1	3264490	-	T	chr1:3264490	Xkr4	LINE	Intron	intron_variant	0	0	-	-	-	-	0.957298	0.0236	0.0121	0.759	|	4.08638	0.017	0.001	0.19	|	1	20	0.05	1	28	0.0357143	0	32	0	4	34	0.117647	3	27	0.111111	0	18	0	|	0	7	0	0	13	0
chr1	3264717	-	T	chr1:3264717	Xkr4	LINE	Intron	intron_variant	0	0	-	-	-	-	1.94374	0.0471	0.0122	0.4	|	0	0.001	0.001	---	|	1	32	0.03125	2	34	0.0588235	0	28	0	1	35	0.0285714	1	21	0.047619	3	39	0.0769231	|	0	12	0	0	11	0
chr1	3264724	-	T	chr1:3264724	Xkr4	LINE	Intron	intron_variant	0	0	-	-	-	-	-1.87404	0.0109	0.0399	0.394	|	1.71948	0.00329	0.001	0.423	|	1	32	0.03125	1	34	0.0294118	2	29	0.0689655	1	37	0.027027	1	21	0.047619	0	41	0	|	0	12	0	0	12	0
chr1	3264772	-	T	chr1:3264772	Xkr4	LINE	Intron	intron_variant	0	0	-	-	-	-	-0.345972	0.00964	0.0122	0.895	|	3.61294	0.0122	0.001	0.184	|	0	29	0	2	33	0.0606061	1	33	0.030303	0	35	0	1	26	0.0384615	1	43	0.0232558	|	0	16	0	0	20	0
chr1	3264779	-	T	chr1:3264779	Xkr4	LINE	Intron	intron_variant	0	0	-	-	-	-	-0.0698786	0.0888	0.0932	0.924	|	2.58859	0.162	0.0269	0.399	|	2	31	0.0645161	6	35	0.171429	3	41	0.0731707	2	44	0.0454545	3	31	0.0967742	7	44	0.159091	|	5	19	0.263158	0	21	0
chr1	3264782	-	T	chr1:3264782	Xkr4	LINE	Intron	intron_variant	0	0	-	-	-	-	1.33153	0.0405	0.0161	0.58	|	1.54944	0.0981	0.0335	0.611	|	0	31	0	3	35	0.0857143	2	41	0.0487805	1	44	0.0227273	2	31	0.0645161	2	44	0.0454545	|	5	19	0.263158	3	21	0.142857
chr1	3264786	-	T	chr1:3264786	Xkr4	LINE	Intron	intron_variant	0	0	-	-	-	-	-0.359334	0.322	0.413	0.0841	|	1.35625	0.629	0.246	0.0748	|	11	30	0.366667	13	33	0.393939	19	39	0.487179	14	42	0.333333	9	30	0.3	14	42	0.333333	|	8	19	0.421053	5	21	0.238095
chr1	3264788	-	T	chr1:3264788	Xkr4	LINE	Intron	intron_variant	0	0	-	-	-	-	0.0120608	0.0147	0.0146	0.997	|	4.20659	0.0692	0.00375	0.149	|	0	28	0	2	34	0.0588235	2	38	0.0526316	0	43	0	2	30	0.0666667	2	42	0.047619	|	1	19	0.0526316	0	21	0
chr1	3286981	-	T	chr1:3286981	Xkr4	.	Intron	intron_variant	0	0	3287972	991	upstream	intronic	1.74294	0.0203	0.00606	0.635	|	3.0851	0.0382	0.0045	0.42	|	0	8	0	2	9	0.222222	0	11	0	0	9	0	1	12	0.0833333	1	10	0.1	|	0	6	0	0	5	0
chr1	3286982	-	T	chr1:3286982	Xkr4	.	Intron	intron_variant	0	0	3287971	989	upstream	intronic	5.06487	0.0335	0.001	0.186	|	2.79361	0.00693	0.001	0.423	|	0	8	0	0	9	0	0	11	0	1	8	0.125	0	10	0	3	10	0.3	|	0	6	0	0	5	0
chr1	3287941	-	T	chr1:3287941	Xkr4	LINE	Intron	intron_variant	0	0	3287012	929	downstream	intronic	0.695821	0.005	0.00309	0.82	|	0	0.001	0.001	---	|	0	13	0	0	21	0	1	34	0.0294118	0	31	0	2	16	0.125	0	10	0	|	0	6	0	0	15	0
chr1	3287956	-	T	chr1:3287956	Xkr4	LINE	Intron	intron_variant	0	0	3286996	960	downstream	intronic	-3.9162	0.00318	0.0481	0.137	|	-2.3341	0.00585	0.0295	0.545	|	1	13	0.0769231	1	21	0.047619	1	33	0.030303	1	31	0.0322581	0	15	0	0	10	0	|	1	6	0.166667	2	13	0.153846
chr1	3316403	-	T	chr1:3316403	Xkr4	LINE	Intron	intron_variant	0	0	-	-	-	-	-0.290239	0.00315	0.00385	0.915	|	-4.01225	0.001	0.0161	0.198	|	0	14	0	0	25	0	2	35	0.0571429	0	13	0	1	32	0.03125	0	25	0	|	1	7	0.142857	0	8	0
chr1	3316404	-	T	chr1:3316404	Xkr4	LINE	Intron	intron_variant	0	0	-	-	-	-	3.42924	0.0108	0.001	0.184	|	-4.01225	0.001	0.0161	0.198	|	0	14	0	0	25	0	0	35	0	0	13	0	1	32	0.03125	1	25	0.04	|	1	7	0.142857	0	8	0
chr1	3383874	-	T	chr1:3383874	Xkr4	LINE	Intron	intron_variant	0	0	3384024	150	upstream	intronic	1.83545	0.00357	0.001	0.423	|	-0.0945977	0.00329	0.00352	0.972	|	0	11	0	0	14	0	0	37	0	0	20	0	0	24	0	1	22	0.0454545	|	0	22	0	0	12	0
chr1	3383877	-	T	chr1:3383877	Xkr4	LINE	Intron	intron_variant	0	0	3384022	145	upstream	intronic	-0.356796	0.00362	0.00464	0.908	|	-0.315586	0.0155	0.0194	0.92	|	1	10	0.1	0	14	0	0	37	0	0	20	0	0	23	0	1	21	0.047619	|	0	22	0	1	12	0.0833333
chr1	3540134	-	T	chr1:3540134	Xkr4	LTR	Intron	intron_variant	0	0	-	-	-	-	-0.0585007	0.181	0.189	0.946	|	1.26283	0.108	0.0452	0.699	|	3	34	0.0882353	10	24	0.416667	11	60	0.183333	9	29	0.310345	5	26	0.192308	1	10	0.1	|	4	15	0.266667	0	8	0
chr1	3540139	-	T	chr1:3540139	Xkr4	LTR	Intron	intron_variant	0	0	-	-	-	-	-4.44042	0.0041	0.089	0.159	|	-7.35522	0.001	0.164	0.00254	|	3	34	0.0882353	3	25	0.12	4	60	0.0666667	2	29	0.0689655	0	27	0	0	10	0	|	4	15	0.266667	1	9	0.111111
chr1	3540144	-	T	chr1:3540144	Xkr4	LTR	Intron	intron_variant	0	0	-	-	-	-	-2.49813	0.0108	0.0613	0.282	|	4.11674	0.0977	0.00563	0.239	|	2	32	0.0625	1	23	0.0434783	5	59	0.0847458	1	29	0.0344828	1	27	0.037037	0	10	0	|	0	15	0	0	9	0
chr1	3540153	-	T	chr1:3540153	Xkr4	LTR	Intron	intron_variant	0	0	-	-	-	-	-0.273143	0.00405	0.0049	0.933	|	-2.91722	0.0156	0.118	0.295	|	4	34	0.117647	0	25	0	0	62	0	2	30	0.0666667	0	33	0	0	11	0	|	1	14	0.0714286	1	9	0.111111
chr1	3540182	-	T	chr1:3540182	Xkr4	LTR	Intron	intron_variant	0	0	-	-	-	-	-0.987801	0.212	0.421	0.018	|	1.00148	0.128	0.0638	0.772	|	13	33	0.393939	13	28	0.464286	24	59	0.40678	8	34	0.235294	9	37	0.243243	3	18	0.166667	|	6	13	0.461538	0	13	0
chr1	3540206	-	T	chr1:3540206	Xkr4	LTR	Intron	intron_variant	0	0	-	-	-	-	1.96712	0.0132	0.00338	0.487	|	4.96978	0.102	0.00325	0.0932	|	0	28	0	0	28	0	2	52	0.0384615	1	29	0.0344828	0	35	0	1	15	0.0666667	|	0	11	0	0	15	0
chr1	3540233	-	T	chr1:3540233	Xkr4	LTR	Intron	intron_variant	0	0	-	-	-	-	2.16923	0.0674	0.015	0.39	|	-2.85025	0.00342	0.0247	0.387	|	1	27	0.037037	0	24	0	4	44	0.0909091	1	24	0.0416667	2	32	0.0625	2	17	0.117647	|	1	8	0.125	0	15	0
chr1	3543989	-	T	chr1:3543989	Xkr4	LTR	Intron	intron_variant	0	0	-	-	-	-	4.24146	0.0553	0.00292	0.103	|	0.145366	0.00389	0.00352	0.959	|	0	22	0	0	20	0	1	40	0.025	1	26	0.0384615	3	31	0.0967742	1	22	0.0454545	|	0	12	0	0	13	0
chr1	3544021	-	T	chr1:3544021	Xkr4	LTR	Intron	intron_variant	0	0	-	-	-	-	4.06675	0.0438	0.00261	0.0903	|	-0.0204668	0.00437	0.00443	0.995	|	0	27	0	0	22	0	1	56	0.0178571	1	34	0.0294118	2	28	0.0714286	1	25	0.04	|	0	12	0	0	12	0
chr1	3544079	-	T	chr1:3544079	Xkr4	LTR	Intron	intron_variant	0	0	-	-	-	-	0.155221	0.00362	0.00325	0.954	|	-2.40363	0.00329	0.0174	0.423	|	0	23	0	1	29	0.0344828	0	58	0	0	44	0	0	35	0	1	21	0.047619	|	1	14	0.0714286	0	10	0
chr1	3544106	-	T	chr1:3544106	Xkr4	LTR	Intron	intron_variant	0	0	-	-	-	-	1.14822	0.243	0.11	0.0858	|	-1.99508	0.0283	0.113	0.5	|	2	32	0.0625	5	34	0.147059	10	70	0.142857	13	62	0.209677	9	44	0.204545	11	33	0.333333	|	2	19	0.105263	1	17	0.0588235
chr1	3544193	-	T	chr1:3544193	Xkr4	LTR	Intron	intron_variant	0	0	-	-	-	-	1.30713	0.00247	0.001	0.423	|	-0.304179	0.00315	0.00389	0.911	|	0	37	0	0	35	0	0	84	0	1	66	0.0151515	0	48	0	0	42	0	|	0	24	0	1	17	0.0588235
chr1	3544249	-	T	chr1:3544249	Xkr4	LTR	Intron	intron_variant	0	0	-	-	-	-	1.36887	0.00743	0.00288	0.551	|	-1.6863	0.00352	0.0113	0.547	|	0	31	0	0	34	0	2	84	0.0238095	1	53	0.0188679	1	46	0.0217391	0	33	0	|	1	15	0.0666667	0	8	0
chr1	3545400	-	T	chr1:3545400	Xkr4	LTR	Intron	intron_variant	0	0	-	-	-	-	-1.35433	0.00277	0.00708	0.546	|	-2.1166	0.00352	0.0152	0.473	|	1	38	0.0263158	0	42	0	1	74	0.0135135	0	46	0	0	64	0	1	47	0.0212766	|	0	25	0	1	18	0.0555556
chr1	3545433	-	T	chr1:3545433	Xkr4	LTR	Intron	intron_variant	0	0	-	-	-	-	3.66258	0.0447	0.00353	0.174	|	-0.517514	0.00283	0.00405	0.848	|	0	39	0	0	37	0	3	68	0.0441176	2	34	0.0588235	5	67	0.0746269	1	49	0.0204082	|	0	20	0	1	15	0.0666667
chr1	3545452	-	T	chr1:3545452	Xkr4	LTR	Intron	intron_variant	0	0	-	-	-	-	0.224397	0.003	0.00257	0.92	|	-0.799516	0.00986	0.0172	0.778	|	0	39	0	0	39	0	1	59	0.0169492	1	37	0.027027	0	57	0	0	48	0	|	1	18	0.0555556	1	11	0.0909091
chr1	3545458	-	T	chr1:3545458	Xkr4	LTR	Intron	intron_variant	0	0	-	-	-	-	-2.8377	0.00797	0.057	0.197	|	1.58544	0.003	0.001	0.423	|	2	42	0.047619	3	38	0.0789474	3	61	0.0491803	1	38	0.0263158	1	52	0.0192308	0	47	0	|	0	19	0	0	13	0
chr1	3545602	-	T	chr1:3545602	Xkr4	LTR	Intron	intron_variant	0	0	-	-	-	-	-0.105083	0.243	0.261	0.798	|	0.552806	0.141	0.0961	0.529	|	12	52	0.230769	15	37	0.405405	16	84	0.190476	12	47	0.255319	21	71	0.295775	11	58	0.189655	|	1	22	0.0454545	2	21	0.0952381
chr1	3545608	-	T	chr1:3545608	Xkr4	LTR	Intron	intron_variant	0	0	-	-	-	-	-0.0825801	0.234	0.247	0.866	|	2.63504	0.18	0.029	0.397	|	13	53	0.245283	10	35	0.285714	19	88	0.215909	6	46	0.130435	24	72	0.333333	17	58	0.293103	|	0	22	0	2	21	0.0952381
chr1	3545647	-	T	chr1:3545647	Xkr4	LTR	Intron	intron_variant	0	0	-	-	-	-	0.274106	0.076	0.0628	0.597	|	2.27879	0.0983	0.0203	0.405	|	3	36	0.0833333	3	42	0.0714286	3	72	0.0416667	5	58	0.0862069	7	64	0.109375	2	43	0.0465116	|	1	13	0.0769231	0	16	0
chr1	3545658	-	T	chr1:3545658	Xkr4	LTR	Intron	intron_variant	0	0	-	-	-	-	1.44548	0.00877	0.00322	0.567	|	3.86614	0.0146	0.001	0.19	|	0	31	0	0	39	0	2	60	0.0333333	1	54	0.0185185	2	55	0.0363636	0	38	0	|	0	10	0	0	15	0
chr1	3545659	-	T	chr1:3545659	Xkr4	LTR	Intron	intron_variant	0	0	-	-	-	-	1.11925	0.00692	0.00318	0.635	|	5.55318	0.047	0.001	0.00335	|	1	31	0.0322581	0	39	0	0	60	0	1	54	0.0185185	1	56	0.0178571	0	38	0	|	0	10	0	0	15	0
chr1	3545674	-	T	chr1:3545674	Xkr4	LTR	Intron	intron_variant	0	0	-	-	-	-	-0.439266	0.00696	0.00944	0.848	|	2.26826	0.0592	0.0123	0.344	|	1	29	0.0344828	1	41	0.0243902	0	61	0	1	52	0.0192308	1	57	0.0175439	0	39	0	|	0	11	0	1	15	0.0666667
chr1	3545683	-	T	chr1:3545683	Xkr4	LTR	Intron	intron_variant	0	0	-	-	-	-	-1.57036	0.0142	0.0422	0.523	|	-2.51813	0.012	0.0687	0.296	|	2	33	0.0606061	3	39	0.0769231	1	62	0.016129	0	57	0	6	55	0.109091	1	38	0.0263158	|	1	11	0.0909091	1	17	0.0588235
chr1	3603061	-	T	chr1:3603061	Xkr4	LTR	Intron	intron_variant	0	0	-	-	-	-	3.75113	0.0436	0.00324	0.146	|	-1.93195	0.001	0.00382	0.423	|	0	49	0	0	45	0	2	59	0.0338983	3	38	0.0789474	1	53	0.0188679	2	36	0.0555556	|	0	24	0	1	18	0.0555556
chr1	3603075	-	T	chr1:3603075	Xkr4	LTR	Intron	intron_variant	0	0	-	-	-	-	-1.47292	0.00815	0.0226	0.436	|	1.87277	0.0121	0.00329	0.498	|	2	53	0.0377358	1	51	0.0196078	1	64	0.015625	1	37	0.027027	1	50	0.02	0	32	0	|	0	27	0	0	17	0
chr1	3603085	-	T	chr1:3603085	Xkr4	LTR	Intron	intron_variant	0	0	-	-	-	-	-0.342789	0.038	0.0481	0.759	|	1.412	0.0125	0.00469	0.654	|	1	52	0.0192308	4	50	0.08	5	69	0.0724638	1	41	0.0243902	1	51	0.0196078	4	35	0.114286	|	0	25	0	0	19	0
chr1	3603088	-	T	chr1:3603088	Xkr4	LTR	Intron	intron_variant	0	0	-	-	-	-	-0.674482	0.0484	0.0772	0.401	|	0.972422	0.126	0.0644	0.116	|	2	50	0.04	5	49	0.102041	8	71	0.112676	4	40	0.1	2	52	0.0384615	1	34	0.0294118	|	1	25	0.04	2	20	0.1
chr1	3603089	-	T	chr1:3603089	Xkr4	LTR	Intron	intron_variant	0	0	-	-	-	-	-2.86351	0.00445	0.0324	0.314	|	1.71948	0.00329	0.001	0.423	|	2	50	0.04	1	49	0.0204082	3	72	0.0416667	0	40	0	0	53	0	3	34	0.0882353	|	0	24	0	0	20	0
chr1	3603090	-	T	chr1:3603090	Xkr4	LTR	Intron	intron_variant	0	0	-	-	-	-	-2.03151	0.0029	0.0119	0.438	|	1.57262	0.0123	0.00415	0.601	|	2	50	0.04	0	49	0	3	72	0.0416667	1	41	0.0243902	0	53	0	0	34	0	|	0	24	0	0	20	0
chr1	3603111	-	T	chr1:3603111	Xkr4	LTR	Intron	intron_variant	0	0	-	-	-	-	-0.197792	0.0429	0.0492	0.808	|	2.64995	0.0264	0.0042	0.449	|	3	54	0.0555556	4	49	0.0816327	2	76	0.0263158	2	43	0.0465116	1	49	0.0204082	3	36	0.0833333	|	0	21	0	0	20	0
chr1	3616798	-	T	chr1:3616798	Xkr4	LINE	Intron	intron_variant	0	0	-	-	-	-	-0.0174891	0.0153	0.0155	0.995	|	-0.107309	0.00354	0.00382	0.97	|	0	32	0	2	36	0.0555556	3	45	0.0666667	2	32	0.0625	0	37	0	2	35	0.0571429	|	0	21	0	0	22	0
chr1	3616802	-	T	chr1:3616802	Xkr4	LINE	Intron	intron_variant	0	0	-	-	-	-	0.441014	0.0525	0.0387	0.592	|	3.04224	0.0249	0.00303	0.354	|	1	32	0.03125	3	36	0.0833333	1	45	0.0222222	2	32	0.0625	1	37	0.027027	3	35	0.0857143	|	0	22	0	0	22	0
chr1	4883029	+	A	chr1:4883029	Gm37988,Gm6104,Tcea1	LTR	Intron	NMD_transcript_variant	0	0	-	-	-	-	-0.45665	0.174	0.239	0.467	|	-0.138346	0.005	0.0055	0.969	|	3	13	0.230769	4	9	0.444444	2	15	0.133333	1	6	0.166667	1	7	0.142857	2	9	0.222222	|	0	8	0	0	5	0
chr1	5092235	+	A	chr1:5092235	Atp6v1h	.	Intron	non_coding_transcript_variant	0	0	-	-	-	-	-0.620336	0.119	0.184	0.358	|	-4.86988	0.001	0.0292	0.19	|	6	17	0.352941	2	12	0.166667	2	19	0.105263	1	12	0.0833333	3	22	0.136364	3	20	0.15	|	0	7	0	1	12	0.0833333
chr1	5154452	+	A	chr1:5154452	Atp6v1h	LTR	Intron	intron_variant	0	0	-	-	-	-	0.304179	0.0049	0.00397	0.925	|	-2.0803	0.00481	0.0203	0.546	|	0	8	0	1	16	0.0625	0	6	0	0	17	0	2	17	0.117647	0	7	0	|	1	7	0.142857	0	6	0
chr1	5154453	+	A	chr1:5154453	Atp6v1h	LTR	Intron	intron_variant	0	0	-	-	-	-	-0.1675	0.0049	0.0055	0.963	|	4.43407	0.0216	0.001	0.184	|	0	8	0	0	16	0	1	6	0.166667	0	17	0	2	17	0.117647	0	6	0	|	0	7	0	0	6	0
chr1	6260210	+	A	chr1:6260210	Rb1cc1	LINE	Intron	non_coding_transcript_variant	1	1	-	-	-	-	-0.549834	0.0153	0.0224	0.863	|	-0.387669	0.0563	0.0736	0.335	|	2	21	0.0952381	0	19	0	4	34	0.117647	1	14	0.0714286	0	13	0	1	20	0.05	|	2	24	0.0833333	1	11	0.0909091
chr1	7172369	+	A	chr1:7172369	Pcmtd1	.	UTR	3_prime_UTR_variant	0	0	-	-	-	-	-0.842137	0.0039	0.007	0.513	|	-0.331056	0.0171	0.0215	0.322	|	1	196	0.00510204	2	184	0.0108696	1	162	0.00617284	0	181	0	1	204	0.00490196	2	165	0.0121212	|	5	224	0.0223214	3	137	0.0218978
chr1	7172370	+	A	chr1:7172370	Pcmtd1	.	UTR	3_prime_UTR_variant	0	0	-	-	-	-	0.229047	0.00512	0.00437	0.896	|	0.133311	0.0146	0.0133	0.898	|	3	196	0.0153061	1	184	0.00543478	0	162	0	2	181	0.0110497	0	204	0	2	165	0.0121212	|	2	225	0.00888889	1	137	0.00729927
chr1	8914042	-	T	chr1:8914042	Sntg1	LTR	Intron	non_coding_transcript_variant	0	0	-	-	-	-	-0.176838	0.00425	0.00481	0.957	|	2.12694	0.0255	0.00585	0.573	|	0	5	0	1	9	0.111111	0	16	0	1	13	0.0769231	0	19	0	0	23	0	|	2	10	0.2	0	7	0
chr1	8914043	-	T	chr1:8914043	Sntg1	LTR	Intron	non_coding_transcript_variant	0	0	-	-	-	-	1.35296	0.0149	0.00585	0.697	|	-4.84642	0.001	0.0288	0.184	|	0	5	0	2	10	0.2	0	16	0	1	15	0.0666667	1	20	0.05	0	24	0	|	0	10	0	1	7	0.142857
chr1	8914083	-	T	chr1:8914083	Sntg1	LTR	Intron	non_coding_transcript_variant	0	0	-	-	-	-	3.77229	0.0137	0.001	0.187	|	0	0.001	0.001	---	|	0	7	0	0	17	0	0	11	0	0	15	0	1	28	0.0357143	2	28	0.0714286	|	0	9	0	0	6	0
chr1	8914088	-	T	chr1:8914088	Sntg1	LTR	Intron	non_coding_transcript_variant	0	0	-	-	-	-	1.72682	0.0716	0.0216	0.527	|	2.46027	0.0055	0.001	0.423	|	0	8	0	1	18	0.0555556	2	11	0.181818	1	15	0.0666667	2	28	0.0714286	2	26	0.0769231	|	0	7	0	0	6	0
chr1	8916272	-	T	chr1:8916272	Sntg1	LTR	Intron	non_coding_transcript_variant	0	0	-	-	-	-	-4.20321	0.001	0.0184	0.188	|	3.70593	0.013	0.001	0.187	|	2	16	0.125	0	19	0	1	20	0.05	0	15	0	0	30	0	0	14	0	|	0	7	0	0	6	0
chr1	8916276	-	T	chr1:8916276	Sntg1	LTR	Intron	non_coding_transcript_variant	0	0	-	-	-	-	2.25026	0.0862	0.0181	0.405	|	-2.4497	0.00405	0.0222	0.474	|	2	16	0.125	0	19	0	1	21	0.047619	2	15	0.133333	1	32	0.03125	2	13	0.153846	|	2	8	0.25	0	5	0
chr1	8916277	-	T	chr1:8916277	Sntg1	LTR	Intron	non_coding_transcript_variant	0	0	-	-	-	-	1.44524	0.0169	0.0062	0.693	|	0.610025	0.013	0.00855	0.876	|	0	16	0	0	19	0	5	21	0.238095	0	15	0	1	32	0.03125	2	13	0.153846	|	5	8	0.625	0	5	0
chr1	9174072	-	T	chr1:9174072	Sntg1	LINE	Intron	non_coding_transcript_variant	0	0	9173437	635	downstream	intronic	-3.53046	0.024	0.278	0.264	|	-0.0260008	0.00595	0.00606	0.995	|	3	14	0.214286	3	6	0.5	1	5	0.2	1	12	0.0833333	1	6	0.166667	0	12	0	|	2	9	0.222222	0	5	0
chr1	9174073	-	T	chr1:9174073	Sntg1	LINE	Intron	non_coding_transcript_variant	0	0	9173436	637	downstream	intronic	-0.74568	0.196	0.329	0.394	|	2.18862	0.0398	0.00874	0.623	|	5	14	0.357143	1	6	0.166667	3	5	0.6	3	12	0.25	2	6	0.333333	1	11	0.0909091	|	6	9	0.666667	0	5	0
chr1	9722558	-	T	chr1:9722558	Vcpip1	SINE	UTR	3_prime_UTR_variant	0	0	-	-	-	-	0.316097	0.0297	0.0239	0.762	|	2.93435	0.0305	0.004	0.278	|	1	77	0.012987	1	54	0.0185185	3	53	0.0566038	3	43	0.0697674	1	83	0.0120482	2	64	0.03125	|	0	48	0	0	25	0
chr1	10031027	-	T	chr1:10031027	Cops5	SINE	Intron	non_coding_transcript_exon_variant	0	0	-	-	-	-	-4.89708	0.00669	0.199	0.214	|	-2.42178	0.001	0.00536	0.423	|	3	9	0.333333	1	6	0.166667	1	7	0.142857	0	15	0	6	20	0.3	0	19	0	|	0	12	0	0	8	0
chr1	10031028	-	T	chr1:10031028	Cops5	SINE	Intron	non_coding_transcript_exon_variant	0	0	-	-	-	-	0.297617	0.49	0.399	0.577	|	0.377222	0.449	0.346	0.376	|	2	9	0.222222	3	6	0.5	4	7	0.571429	8	15	0.533333	12	20	0.6	7	19	0.368421	|	4	13	0.307692	2	8	0.25
chr1	10031543	-	T	chr1:10031543	Cops5	SINE	Intron	non_coding_transcript_exon_variant	0	0	-	-	-	-	-0.0965022	0.0178	0.0191	0.976	|	3.70593	0.013	0.001	0.184	|	2	16	0.125	1	18	0.0555556	0	20	0	1	22	0.0454545	1	8	0.125	0	7	0	|	0	12	0	0	15	0
chr1	10031549	-	T	chr1:10031549	Cops5	SINE	Intron	non_coding_transcript_exon_variant	1	1	10031547	2	downstream	intronic	0.389975	0.0288	0.022	0.913	|	0.531577	0.029	0.0201	0.879	|	0	17	0	4	18	0.222222	1	21	0.047619	4	21	0.190476	1	8	0.125	0	7	0	|	2	13	0.153846	0	15	0
chr1	10031579	-	T	chr1:10031579	Cops5	SINE	Intron	non_coding_transcript_exon_variant	0	0	10030991	588	downstream	intronic	-2.23929	0.001	0.00472	0.423	|	4.76083	0.0968	0.00357	0.118	|	0	15	0	2	19	0.105263	0	17	0	0	21	0	0	11	0	0	5	0	|	0	14	0	0	18	0
chr1	10031581	-	T	chr1:10031581	Cops5	SINE	Intron	non_coding_transcript_exon_variant	1	1	10030989	592	downstream	intronic	-3.03672	0.00362	0.0297	0.384	|	1.62148	0.052	0.0169	0.512	|	2	16	0.125	4	19	0.210526	0	16	0	1	21	0.047619	0	11	0	0	6	0	|	0	13	0	1	18	0.0555556
chr1	10031590	-	T	chr1:10031590	Cops5	SINE	Intron	non_coding_transcript_exon_variant	1	1	-	-	-	-	1.90595	0.00375	0.001	0.423	|	3.81726	0.0141	0.001	0.184	|	0	16	0	0	19	0	0	16	0	1	19	0.0526316	0	12	0	0	5	0	|	0	14	0	0	19	0
chr1	10031605	-	T	chr1:10031605	Cops5	SINE	Intron	non_coding_transcript_exon_variant	1	1	-	-	-	-	1.85782	0.00362	0.001	0.423	|	2.42924	0.0173	0.00322	0.421	|	0	20	0	0	21	0	0	20	0	1	21	0.047619	0	17	0	0	7	0	|	0	16	0	0	20	0
chr1	10079233	+	A	chr1:10079233	Cspp1	SINE	Intron	non_coding_transcript_variant	0	0	-	-	-	-	-2.17047	0.0338	0.152	0.487	|	3.08599	0.172	0.0203	0.293	|	6	19	0.315789	1	6	0.166667	1	15	0.0666667	3	12	0.25	2	13	0.153846	0	8	0	|	0	11	0	1	15	0.0666667
chr1	10079257	+	A	chr1:10079257	Cspp1	SINE	Intron	non_coding_transcript_variant	0	0	10080257	1000	downstream	Intron	-0.171524	0.00464	0.00523	0.961	|	-2.90092	0.00464	0.0347	0.444	|	0	16	0	0	6	0	2	14	0.142857	1	10	0.1	0	12	0	0	8	0	|	0	11	0	1	8	0.125
chr1	10098444	+	A	chr1:10098444	Cspp1	DNA	Intron	non_coding_transcript_variant	0	0	-	-	-	-	-1.15787	0.101	0.225	0.281	|	2.26529	0.00481	0.001	0.423	|	4	14	0.285714	2	12	0.166667	6	25	0.24	2	18	0.111111	1	27	0.037037	4	16	0.25	|	0	5	0	0	8	0
chr1	10107344	+	A	chr1:10107344	Cspp1	SINE	Intron	non_coding_transcript_variant	0	0	-	-	-	-	-1.71948	0.001	0.00329	0.423	|	0	0.001	0.001	---	|	0	23	0	1	28	0.0357143	0	29	0	0	19	0	0	27	0	0	24	0	|	0	6	0	0	5	0
chr1	11596989	+	A	chr1:11596989	A830018L16Rik	SINE	UTR	3_prime_UTR_variant	1	1	-	-	-	-	-1.87309	0.00397	0.0145	0.537	|	-0.194988	0.00322	0.00368	0.942	|	2	31	0.0645161	1	21	0.047619	0	27	0	0	40	0	0	35	0	1	16	0.0625	|	0	23	0	0	12	0
chr1	11597017	+	A	chr1:11597017	A830018L16Rik	SINE	UTR	3_prime_UTR_variant	1	1	-	-	-	-	1.865	0.0486	0.0134	0.435	|	-0.833394	0.0113	0.0202	0.783	|	4	48	0.0833333	0	36	0	1	35	0.0285714	2	56	0.0357143	3	49	0.0612245	1	19	0.0526316	|	5	39	0.128205	0	17	0
chr1	11597042	+	A	chr1:11597042	A830018L16Rik	SINE	UTR	3_prime_UTR_variant	1	1	-	-	-	-	-0.356319	0.00998	0.0128	0.896	|	-1.56013	0.001	0.00295	0.423	|	4	48	0.0833333	0	31	0	1	40	0.025	1	53	0.0188679	0	44	0	1	19	0.0526316	|	1	39	0.025641	0	18	0
chr1	11597052	+	A	chr1:11597052	A830018L16Rik	SINE	UTR	3_prime_UTR_variant	1	1	-	-	-	-	-1.95651	0.00266	0.0103	0.427	|	-0.448378	0.00277	0.00378	0.862	|	2	49	0.0408163	0	31	0	1	37	0.027027	1	53	0.0188679	0	43	0	0	17	0	|	2	37	0.0540541	0	17	0
chr1	13625036	-	T	chr1:13625036	Lactb2	SINE	UTR	3_prime_UTR_variant	1	1	-	-	-	-	-5.37876	0.00776	0.323	0.21	|	-5.66852	0.00464	0.236	0.121	|	6	14	0.428571	6	18	0.333333	4	17	0.235294	0	8	0	0	15	0	7	15	0.466667	|	3	8	0.375	4	19	0.210526
chr1	15332223	+	A	chr1:15332223	Kcnb2	LTR	Intron	intron_variant	0	0	-	-	-	-	-1.23699	0.0045	0.0106	0.679	|	1.92226	0.0122	0.00322	0.481	|	0	46	0	1	35	0.0285714	2	48	0.0416667	0	62	0	4	44	0.0909091	0	27	0	|	1	30	0.0333333	0	28	0
chr1	15336370	+	A	chr1:15336370	Kcnb2	LTR	Intron	intron_variant	0	0	-	-	-	-	-0.118779	0.00825	0.00896	0.96	|	-2.54158	0.00322	0.0187	0.407	|	1	48	0.0208333	0	46	0	2	58	0.0344828	1	54	0.0185185	1	33	0.030303	0	30	0	|	0	20	0	1	19	0.0526316
chr1	15336374	+	A	chr1:15336374	Kcnb2	LTR	Intron	intron_variant	0	0	-	-	-	-	0.132814	0.0103	0.00938	0.959	|	0.178684	0.00464	0.0041	0.956	|	2	44	0.0454545	0	45	0	1	55	0.0181818	1	54	0.0185185	2	34	0.0588235	0	30	0	|	0	19	0	0	19	0
chr1	15336392	+	A	chr1:15336392	Kcnb2	LTR	Intron	intron_variant	0	0	-	-	-	-	0.980059	0.0166	0.00842	0.722	|	1.90729	0.0203	0.0054	0.591	|	0	37	0	1	39	0.025641	1	43	0.0232558	0	42	0	2	23	0.0869565	1	19	0.0526316	|	0	20	0	3	19	0.157895
chr1	15339196	+	A	chr1:15339196	Kcnb2	LTR	Intron	intron_variant	0	0	-	-	-	-	0	0.001	0.001	---	|	-0.255178	0.0049	0.00585	0.944	|	0	15	0	0	12	0	0	17	0	0	8	0	0	7	0	0	11	0	|	1	5	0.2	0	5	0
chr1	15339197	+	A	chr1:15339197	Kcnb2	LTR	Intron	intron_variant	0	0	-	-	-	-	-2.12694	0.001	0.00437	0.423	|	6.07421	0.287	0.00425	0.0985	|	0	15	0	1	12	0.0833333	0	17	0	0	9	0	0	7	0	0	11	0	|	0	5	0	0	5	0
chr1	15342925	+	A	chr1:15342925	Kcnb2	LINE	Intron	intron_variant	0	0	-	-	-	-	0	0.001	0.001	---	|	-0.1675	0.00389	0.00437	0.957	|	0	16	0	0	8	0	0	20	0	0	22	0	0	14	0	0	15	0	|	0	10	0	1	12	0.0833333
chr1	15343243	+	A	chr1:15343243	Kcnb2	LINE	Intron	intron_variant	0	0	-	-	-	-	-4.34156	0.001	0.0203	0.184	|	0	0.001	0.001	---	|	0	6	0	1	10	0.1	1	12	0.0833333	0	16	0	0	10	0	0	5	0	|	0	5	0	0	6	0
chr1	15345663	+	A	chr1:15345663	Kcnb2	.	Intron	intron_variant	0	0	-	-	-	-	-3.95487	0.00378	0.0586	0.172	|	-1.09494	0.0135	0.0289	0.741	|	4	44	0.0909091	2	41	0.0487805	2	44	0.0454545	0	55	0	0	33	0	2	37	0.0540541	|	3	17	0.176471	0	13	0
chr1	15357033	+	A	chr1:15357033	Kcnb2	LTR	Intron	intron_variant	0	0	15357984	951	downstream	intronic	-0.576451	0.00288	0.00429	0.836	|	-1.39372	0.0275	0.0723	0.62	|	3	38	0.0789474	0	38	0	0	43	0	1	42	0.0238095	0	29	0	0	33	0	|	1	12	0.0833333	1	21	0.047619
chr1	15357046	+	A	chr1:15357046	Kcnb2	.	Intron	intron_variant	0	0	15357971	925	downstream	intronic	-2.15874	0.0094	0.042	0.315	|	0.269118	0.00437	0.00362	0.929	|	2	37	0.0540541	1	34	0.0294118	2	43	0.0465116	1	43	0.0232558	1	28	0.0357143	0	31	0	|	0	10	0	1	21	0.047619
chr1	15357047	+	A	chr1:15357047	Kcnb2	.	Intron	intron_variant	0	0	15357970	923	downstream	intronic	1.85351	0.0137	0.00378	0.539	|	0.251629	0.00397	0.00333	0.929	|	2	37	0.0540541	0	34	0	0	43	0	1	42	0.0238095	3	28	0.107143	0	31	0	|	0	10	0	0	21	0
chr1	15357051	+	A	chr1:15357051	Kcnb2	.	Intron	intron_variant	0	0	15357967	916	downstream	intronic	-3.81583	0.00318	0.0448	0.143	|	2.1503	0.0208	0.00469	0.53	|	3	40	0.075	1	37	0.027027	2	45	0.0444444	0	42	0	1	31	0.0322581	0	32	0	|	0	10	0	0	20	0
chr1	15357948	+	A	chr1:15357948	Kcnb2	.	Intron	intron_variant	0	0	15357072	876	upstream	intronic	0	0.001	0.001	---	|	0.145366	0.00389	0.00352	0.959	|	0	34	0	0	17	0	0	45	0	0	24	0	0	32	0	0	45	0	|	0	13	0	0	12	0
chr1	15357956	+	A	chr1:15357956	Kcnb2	.	Intron	intron_variant	0	0	15357061	895	upstream	intronic	-1.77398	0.001	0.00342	0.423	|	0.451212	0.00481	0.00352	0.884	|	1	25	0.04	0	17	0	0	40	0	0	25	0	0	37	0	0	43	0	|	0	11	0	0	13	0
chr1	15419746	+	A	chr1:15419746	Kcnb2	LTR	Intron	intron_variant	0	0	-	-	-	-	-0.335079	0.0093	0.0117	0.897	|	-1.75087	0.00338	0.0114	0.52	|	2	45	0.0444444	0	33	0	2	55	0.0363636	1	54	0.0185185	2	46	0.0434783	0	32	0	|	0	23	0	1	22	0.0454545
chr1	15419750	+	A	chr1:15419750	Kcnb2	LTR	Intron	intron_variant	0	0	-	-	-	-	-0.73748	0.0144	0.0239	0.741	|	-2.0842	0.00338	0.0143	0.474	|	1	39	0.025641	1	34	0.0294118	1	55	0.0181818	2	52	0.0384615	3	39	0.0769231	0	30	0	|	0	23	0	2	22	0.0909091
chr1	15419751	+	A	chr1:15419751	Kcnb2	LTR	Intron	intron_variant	0	0	-	-	-	-	2.52695	0.128	0.0222	0.38	|	0.235123	0.047	0.0399	0.757	|	6	39	0.153846	0	34	0	4	56	0.0714286	8	52	0.153846	4	39	0.102564	4	30	0.133333	|	1	23	0.0434783	1	22	0.0454545
chr1	15419824	+	A	chr1:15419824	Kcnb2	LTR	Intron	intron_variant	0	0	-	-	-	-	-3.97625	0.00271	0.0427	0.098	|	-0.250969	0.0103	0.0123	0.924	|	3	45	0.0666667	2	38	0.0526316	1	45	0.0222222	1	50	0.02	0	41	0	0	35	0	|	0	27	0	1	18	0.0555556
chr1	15420007	+	A	chr1:15420007	Kcnb2	LTR	Intron	intron_variant	0	0	-	-	-	-	0.482947	0.0725	0.0519	0.653	|	-0.69013	0.0154	0.0249	0.835	|	4	26	0.153846	2	38	0.0526316	1	58	0.0172414	2	37	0.0540541	4	46	0.0869565	3	37	0.0810811	|	3	13	0.230769	1	15	0.0666667
chr1	15425304	+	A	chr1:15425304	Kcnb2	LTR	Intron	intron_variant	0	0	-	-	-	-	2.32193	0.005	0.001	0.423	|	0.389975	0.00572	0.00437	0.912	|	0	12	0	0	28	0	0	26	0	0	17	0	0	29	0	1	8	0.125	|	1	12	0.0833333	0	13	0
chr1	15425320	+	A	chr1:15425320	Kcnb2	LTR	Intron	intron_variant	0	0	-	-	-	-	1.40363	0.0146	0.0055	0.683	|	1.88129	0.00368	0.001	0.423	|	2	12	0.166667	0	30	0	0	30	0	0	21	0	1	36	0.0277778	1	9	0.111111	|	0	13	0	0	13	0
chr1	15425414	+	A	chr1:15425414	Kcnb2	LTR	Intron	intron_variant	0	0	-	-	-	-	2.16878	0.0045	0.001	0.423	|	-0.389975	0.00303	0.00397	0.886	|	0	11	0	0	26	0	0	31	0	0	16	0	0	36	0	1	11	0.0909091	|	1	16	0.0625	0	16	0
chr1	15425443	+	A	chr1:15425443	Kcnb2	LTR	Intron	intron_variant	0	0	-	-	-	-	2.15361	0.0946	0.0213	0.443	|	3.55806	0.0118	0.001	0.188	|	1	16	0.0625	0	22	0	4	26	0.153846	1	14	0.0714286	1	23	0.0434783	3	11	0.272727	|	0	15	0	0	14	0
chr1	15425459	+	A	chr1:15425459	Kcnb2	LTR	Intron	intron_variant	0	0	-	-	-	-	2.47604	0.0177	0.00318	0.409	|	2.85025	0.0261	0.00362	0.398	|	0	17	0	0	28	0	1	31	0.0322581	1	18	0.0555556	0	28	0	1	10	0.1	|	0	17	0	1	21	0.047619
chr1	15442260	+	A	chr1:15442260	Kcnb2	SINE	Intron	intron_variant	0	0	-	-	-	-	3.81491	0.0141	0.001	0.184	|	-0.653633	0.0103	0.0162	0.819	|	0	42	0	0	26	0	0	46	0	2	35	0.0571429	0	33	0	2	41	0.0487805	|	2	17	0.117647	0	12	0
chr1	15567850	+	A	chr1:15567850	Kcnb2	SINE	Intron	intron_variant	0	0	-	-	-	-	0.107309	0.0147	0.0137	0.971	|	3.68707	0.0644	0.005	0.251	|	1	26	0.0384615	1	15	0.0666667	0	20	0	1	26	0.0384615	0	19	0	1	12	0.0833333	|	1	8	0.125	0	11	0
chr1	16312795	-	T	chr1:16312795	Stau2	.	Intron	intron_variant	0	0	16313103	308	upstream	intronic	0.0370104	0.00669	0.00652	0.993	|	2.35296	0.00511	0.001	0.423	|	0	13	0	5	18	0.277778	0	17	0	0	15	0	6	20	0.3	0	21	0	|	0	5	0	0	5	0
chr1	16313076	-	T	chr1:16313076	Stau2	.	Intron	intron_variant	0	0	16312823	253	downstream	intronic	0.297695	0.00415	0.00338	0.918	|	2.32193	0.005	0.001	0.423	|	0	18	0	1	26	0.0384615	0	21	0	0	20	0	1	14	0.0714286	0	6	0	|	0	9	0	0	10	0
chr1	16313080	-	T	chr1:16313080	Stau2	.	Intron	intron_variant	0	0	16312821	259	downstream	intronic	0.892295	0.155	0.0838	0.334	|	-0.0310365	0.173	0.177	0.954	|	1	18	0.0555556	6	27	0.222222	1	21	0.047619	3	19	0.157895	2	14	0.142857	1	6	0.166667	|	2	9	0.222222	1	10	0.1
chr1	16313081	-	T	chr1:16313081	Stau2	.	Intron	intron_variant	0	0	16312816	265	downstream	intronic	-1.85294	0.0228	0.0825	0.508	|	1.20244	0.347	0.151	0.117	|	1	18	0.0555556	6	27	0.222222	1	22	0.0454545	0	20	0	1	14	0.0714286	1	6	0.166667	|	2	9	0.222222	2	10	0.2
chr1	16313091	-	T	chr1:16313091	Stau2	.	Intron	intron_variant	0	0	16312806	285	downstream	intronic	2.05281	0.00415	0.001	0.423	|	0	0.001	0.001	---	|	0	18	0	0	28	0	0	24	0	0	17	0	1	14	0.0714286	0	8	0	|	0	9	0	0	12	0
chr1	16387478	-	T	chr1:16387478	Stau2	LINE	Intron	NMD_transcript_variant	0	0	16385939	1539	downstream	intronic	-4.01225	0.001	0.0161	0.184	|	-4.19576	0.00382	0.0699	0.162	|	1	17	0.0588235	1	14	0.0714286	0	13	0	0	20	0	0	14	0	0	9	0	|	1	13	0.0769231	1	15	0.0666667
chr1	16461352	-	T	chr1:16461352	Stau2	LINE	Intron	NMD_transcript_variant	0	0	-	-	-	-	1.79361	0.0186	0.00536	0.607	|	0	0.00585	0.00585	1	|	0	6	0	0	11	0	2	13	0.153846	1	13	0.0769231	0	8	0	1	12	0.0833333	|	1	5	0.2	0	8	0
chr1	16563508	-	T	chr1:16563508	Ube2w	SINE	intergenic	intron_variant	0	0	-	-	-	-	-2.42924	0.00464	0.025	0.491	|	2.74696	0.0323	0.00481	0.463	|	2	16	0.125	0	6	0	1	8	0.125	2	20	0.1	0	22	0	0	12	0	|	0	8	0	0	6	0
chr1	16567027	-	T	chr1:16567027	Ube2w	SINE	intergenic	non_coding_transcript_variant	0	0	16565323	1704	downstream	undefined	2.32584	0.0528	0.0105	0.307	|	-5.79301	0.001	0.0554	0.00062	|	1	39	0.025641	1	22	0.0454545	0	31	0	3	50	0.06	2	57	0.0350877	3	43	0.0697674	|	2	32	0.0625	1	22	0.0454545
chr1	21678032	-	T	chr1:21678032	Kcnq5	LTR	Intron	non_coding_transcript_variant	0	0	-	-	-	-	0	0.001	0.001	---	|	-5.20321	0.001	0.0368	0.184	|	0	8	0	0	11	0	0	12	0	0	10	0	0	14	0	0	11	0	|	0	6	0	2	10	0.2
chr1	21678036	-	T	chr1:21678036	Kcnq5	LTR	Intron	non_coding_transcript_variant	0	0	-	-	-	-	0	0.001	0.001	---	|	2.26529	0.00481	0.001	0.423	|	0	7	0	0	10	0	0	12	0	0	10	0	0	14	0	0	11	0	|	0	6	0	0	10	0
chr1	21678038	-	T	chr1:21678038	Kcnq5	LTR	Intron	non_coding_transcript_variant	0	0	-	-	-	-	0	0.001	0.001	---	|	-0.45419	0.00481	0.00659	0.904	|	0	7	0	0	10	0	0	13	0	0	10	0	0	14	0	0	11	0	|	0	6	0	0	10	0
chr1	21678039	-	T	chr1:21678039	Kcnq5	LTR	Intron	non_coding_transcript_variant	0	0	-	-	-	-	-2.21462	0.001	0.00464	0.423	|	-0.259203	0.0055	0.00659	0.947	|	0	7	0	1	10	0.1	0	13	0	0	11	0	0	14	0	0	10	0	|	0	6	0	0	10	0
chr1	21680834	-	T	chr1:21680834	Kcnq5	LTR	Intron	non_coding_transcript_variant	0	0	-	-	-	-	-2.25595	0.00389	0.0186	0.477	|	0.264516	0.0281	0.0234	0.941	|	0	12	0	1	13	0.0769231	2	24	0.0833333	1	17	0.0588235	0	14	0	0	9	0	|	0	16	0	2	12	0.166667
chr1	21680879	-	T	chr1:21680879	Kcnq5	LTR	Intron	non_coding_transcript_variant	0	0	-	-	-	-	2.56758	0.024	0.00405	0.451	|	-0.528321	0.0045	0.00648	0.886	|	0	8	0	1	15	0.0666667	0	18	0	0	10	0	1	12	0.0833333	1	6	0.166667	|	0	12	0	3	11	0.272727
chr1	21681066	-	T	chr1:21681066	Kcnq5	LTR	Intron	non_coding_transcript_variant	0	0	-	-	-	-	3.71674	0.0912	0.00693	0.315	|	0.692293	0.0329	0.0203	0.849	|	4	12	0.333333	0	13	0	0	20	0	1	12	0.0833333	1	11	0.0909091	1	10	0.1	|	0	15	0	2	23	0.0869565
chr1	21731682	-	T	chr1:21731682	Kcnq5	LINE	Intron	non_coding_transcript_variant	0	0	-	-	-	-	-4.74371	0.001	0.0268	0.189	|	2.54795	0.0243	0.00415	0.46	|	2	8	0.25	0	12	0	1	13	0.0769231	0	16	0	0	21	0	0	10	0	|	0	11	0	0	10	0
chr1	21732015	-	T	chr1:21732015	Kcnq5	LINE	Intron	non_coding_transcript_variant	0	0	-	-	-	-	0	0.001	0.001	---	|	-0.861654	0.00405	0.00737	0.82	|	0	10	0	0	7	0	0	27	0	0	15	0	0	6	0	0	14	0	|	0	7	0	2	5	0.4
chr1	21732029	-	T	chr1:21732029	Kcnq5	LINE	Intron	non_coding_transcript_variant	0	0	-	-	-	-	2.05281	0.00415	0.001	0.423	|	-2.54795	0.001	0.00585	0.423	|	0	10	0	0	6	0	0	29	0	0	17	0	0	6	0	1	14	0.0714286	|	0	6	0	1	5	0.2
chr1	21742986	-	T	chr1:21742986	Kcnq5	LINE	Intron	non_coding_transcript_variant	0	0	21744134	1148	upstream	intronic	2.46027	0.0055	0.001	0.423	|	2.21462	0.00464	0.001	0.423	|	0	15	0	0	12	0	0	14	0	0	11	0	0	10	0	1	6	0.166667	|	0	10	0	0	8	0
chr1	21743042	-	T	chr1:21743042	Kcnq5	LTR	Intron	non_coding_transcript_variant	0	0	-	-	-	-	2.6863	0.0405	0.0063	0.517	|	0.738338	0.228	0.137	0.17	|	0	11	0	2	8	0.25	0	14	0	0	8	0	1	6	0.166667	2	5	0.4	|	1	10	0.1	2	13	0.153846
chr1	21755377	-	T	chr1:21755377	Kcnq5	LINE	Intron	non_coding_transcript_variant	0	0	-	-	-	-	0.575439	0.0245	0.0164	0.863	|	1.79361	0.0141	0.00405	0.554	|	1	15	0.0666667	1	15	0.0666667	0	9	0	0	7	0	1	17	0.0588235	2	8	0.25	|	1	15	0.0666667	0	20	0
chr1	21776697	-	T	chr1:21776697	Kcnq5	.	Intron	non_coding_transcript_variant	0	0	-	-	-	-	-1.98536	0.0288	0.114	0.509	|	2.80578	0.142	0.0203	0.327	|	8	19	0.421053	1	21	0.047619	2	27	0.0740741	5	33	0.151515	3	19	0.157895	0	16	0	|	0	7	0	1	8	0.125
chr1	21776702	-	T	chr1:21776702	Kcnq5	.	Intron	non_coding_transcript_variant	0	0	-	-	-	-	0.296606	0.00445	0.00362	0.922	|	2.32193	0.005	0.001	0.423	|	1	21	0.047619	0	22	0	0	35	0	3	34	0.0882353	0	20	0	0	16	0	|	0	9	0	0	8	0
chr1	21776716	-	T	chr1:21776716	Kcnq5	.	Intron	non_coding_transcript_variant	0	0	-	-	-	-	-2.53843	0.0205	0.119	0.368	|	-2.66795	0.0203	0.129	0.344	|	6	21	0.285714	1	25	0.04	5	34	0.147059	3	35	0.0857143	2	20	0.1	0	16	0	|	2	11	0.181818	1	10	0.1
chr1	21776742	-	T	chr1:21776742	Kcnq5	.	Intron	non_coding_transcript_variant	0	0	-	-	-	-	2.05281	0.00415	0.001	0.423	|	-0.252997	0.00357	0.00425	0.932	|	0	20	0	0	34	0	0	37	0	2	28	0.0714286	0	19	0	0	15	0	|	1	13	0.0769231	0	12	0
chr1	21776763	-	T	chr1:21776763	Kcnq5	.	Intron	non_coding_transcript_variant	0	0	-	-	-	-	-1.45894	0.0128	0.0351	0.515	|	-4.44209	0.00357	0.0776	0.135	|	1	19	0.0526316	1	32	0.03125	1	38	0.0263158	1	30	0.0333333	1	16	0.0625	0	14	0	|	1	12	0.0833333	1	17	0.0588235
chr1	21776764	-	T	chr1:21776764	Kcnq5	.	Intron	non_coding_transcript_variant	0	0	-	-	-	-	-4.43504	0.00464	0.1	0.183	|	-0.29149	0.00357	0.00437	0.922	|	2	19	0.105263	3	32	0.09375	4	39	0.102564	3	30	0.1	0	16	0	0	14	0	|	1	12	0.0833333	0	17	0
chr1	21776956	-	T	chr1:21776956	Kcnq5	.	Intron	non_coding_transcript_variant	0	0	-	-	-	-	1.52449	0.0144	0.005	0.641	|	-0.308666	0.00375	0.00464	0.921	|	0	17	0	0	16	0	4	32	0.125	1	24	0.0416667	0	24	0	1	14	0.0714286	|	0	13	0	1	10	0.1
chr1	21776962	-	T	chr1:21776962	Kcnq5	.	Intron	non_coding_transcript_variant	0	0	-	-	-	-	0.447985	0.00425	0.00312	0.875	|	-6.14734	0.001	0.0709	0.00448	|	0	16	0	0	14	0	1	33	0.030303	0	24	0	0	20	0	1	13	0.0769231	|	1	13	0.0769231	1	9	0.111111
chr1	21776968	-	T	chr1:21776968	Kcnq5	.	Intron	non_coding_transcript_variant	0	0	-	-	-	-	1.92138	0.0244	0.00644	0.617	|	0.0741308	0.00481	0.00457	0.982	|	0	14	0	0	13	0	8	30	0.266667	3	23	0.130435	2	18	0.111111	0	13	0	|	0	12	0	0	7	0
chr1	21776969	-	T	chr1:21776969	Kcnq5	.	Intron	non_coding_transcript_variant	0	0	-	-	-	-	2.63946	0.141	0.0226	0.367	|	-3.14979	0.0197	0.175	0.279	|	1	14	0.0714286	0	12	0	5	31	0.16129	5	23	0.217391	1	18	0.0555556	3	13	0.230769	|	1	12	0.0833333	3	7	0.428571
chr1	21776978	-	T	chr1:21776978	Kcnq5	.	Intron	non_coding_transcript_variant	0	0	-	-	-	-	-0.410204	0.178	0.237	0.524	|	2.91326	0.165	0.0219	0.321	|	7	15	0.466667	2	10	0.2	4	28	0.142857	3	22	0.136364	4	16	0.25	2	12	0.166667	|	1	10	0.1	0	6	0
chr1	21776983	-	T	chr1:21776983	Kcnq5	.	Intron	non_coding_transcript_variant	0	0	-	-	-	-	-0.85568	0.104	0.187	0.0559	|	-0.107309	0.00464	0.005	0.975	|	2	15	0.133333	2	9	0.222222	6	27	0.222222	2	20	0.1	2	15	0.133333	1	12	0.0833333	|	0	9	0	0	6	0
chr1	21777036	-	T	chr1:21777036	Kcnq5	.	Intron	non_coding_transcript_variant	0	0	-	-	-	-	0	0.001	0.001	---	|	0	0.001	0.001	---	|	0	9	0	0	9	0	0	15	0	0	9	0	0	13	0	0	6	0	|	0	9	0	0	9	0
chr1	21777062	-	T	chr1:21777062	Kcnq5	.	Intron	non_coding_transcript_variant	0	0	-	-	-	-	0	0.001	0.001	---	|	0	0.001	0.001	---	|	0	8	0	0	9	0	0	15	0	0	14	0	0	12	0	0	6	0	|	0	6	0	0	10	0
chr1	21777116	-	T	chr1:21777116	Kcnq5	.	Intron	non_coding_transcript_variant	0	0	-	-	-	-	0.306129	0.0247	0.0199	0.93	|	1.98859	0.024	0.00606	0.597	|	1	14	0.0714286	1	9	0.111111	0	20	0	0	21	0	1	20	0.05	3	10	0.3	|	2	9	0.222222	0	11	0
chr1	21777120	-	T	chr1:21777120	Kcnq5	.	Intron	non_coding_transcript_variant	0	0	-	-	-	-	3.60943	0.0122	0.001	0.184	|	2.32193	0.005	0.001	0.423	|	0	15	0	0	10	0	0	24	0	1	25	0.04	1	22	0.0454545	0	9	0	|	0	10	0	0	11	0
chr1	21777135	-	T	chr1:21777135	Kcnq5	.	Intron	non_coding_transcript_variant	0	0	-	-	-	-	2.13291	0.0747	0.017	0.419	|	-0.149153	0.0281	0.0312	0.968	|	2	15	0.133333	0	8	0	1	27	0.037037	2	24	0.0833333	1	20	0.05	1	10	0.1	|	3	9	0.333333	0	10	0
chr1	21787092	-	T	chr1:21787092	Kcnq5	LINE	Intron	non_coding_transcript_variant	0	0	-	-	-	-	-2.54226	0.00709	0.0413	0.551	|	-2.36799	0.0359	0.185	0.457	|	0	6	0	6	17	0.352941	3	15	0.2	5	14	0.357143	0	14	0	0	8	0	|	1	9	0.111111	3	15	0.2
chr1	21787099	-	T	chr1:21787099	Kcnq5	LINE	Intron	non_coding_transcript_variant	0	0	-	-	-	-	-2.2706	0.0222	0.107	0.421	|	-1.91978	0.00536	0.0203	0.588	|	1	6	0.166667	2	18	0.111111	1	15	0.0666667	2	13	0.153846	1	14	0.0714286	0	8	0	|	0	10	0	1	15	0.0666667
chr1	21787127	-	T	chr1:21787127	Kcnq5	LINE	Intron	non_coding_transcript_variant	0	0	21788403	1276	upstream	intronic	-4.34156	0.001	0.0203	0.191	|	4.3834	0.0209	0.001	0.184	|	1	6	0.166667	1	20	0.05	0	15	0	0	14	0	0	13	0	0	10	0	|	0	10	0	0	14	0
chr1	21787136	-	T	chr1:21787136	Kcnq5	LINE	Intron	non_coding_transcript_variant	0	0	21788394	1258	upstream	intronic	-0.407464	0.00415	0.0055	0.905	|	-2.05281	0.001	0.00415	0.423	|	1	6	0.166667	0	20	0	0	14	0	1	14	0.0714286	0	13	0	0	9	0	|	0	10	0	1	14	0.0714286
chr1	21787280	-	T	chr1:21787280	Kcnq5	LINE	Intron	non_coding_transcript_variant	0	0	-	-	-	-	0.30987	0.239	0.193	0.568	|	0.408946	0.319	0.24	0.619	|	3	10	0.3	2	14	0.142857	2	12	0.166667	4	14	0.285714	2	6	0.333333	1	7	0.142857	|	1	10	0.1	3	10	0.3
chr1	21787299	-	T	chr1:21787299	Kcnq5	LINE	Intron	non_coding_transcript_variant	0	0	-	-	-	-	-2.35296	0.00598	0.0306	0.546	|	-3.05812	0.00487	0.0405	0.435	|	2	10	0.2	2	14	0.142857	0	13	0	3	14	0.214286	0	5	0	0	7	0	|	0	9	0	3	9	0.333333
chr1	21788391	-	T	chr1:21788391	Kcnq5	LINE	Intron	non_coding_transcript_variant	0	0	21787139	1252	downstream	intronic	-2.26406	0.0172	0.0828	0.386	|	1.22723	0.0911	0.0389	0.691	|	1	12	0.0833333	2	21	0.0952381	2	28	0.0714286	0	20	0	1	17	0.0588235	2	23	0.0869565	|	0	5	0	4	12	0.333333
chr1	21788392	-	T	chr1:21788392	Kcnq5	LINE	Intron	non_coding_transcript_variant	0	0	21787138	1254	downstream	intronic	-5.68736	0.001	0.0515	0.00425	|	1.96111	0.0151	0.00389	0.518	|	1	12	0.0833333	1	21	0.047619	1	29	0.0344828	0	20	0	0	17	0	0	23	0	|	0	5	0	0	12	0
chr1	21788399	-	T	chr1:21788399	Kcnq5	LINE	Intron	non_coding_transcript_variant	0	0	21787130	1269	downstream	intronic	-2.58113	0.00382	0.0228	0.436	|	3.3979	0.0603	0.00572	0.309	|	1	12	0.0833333	3	21	0.142857	0	30	0	0	19	0	1	18	0.0555556	0	22	0	|	0	6	0	0	12	0
chr1	21788416	-	T	chr1:21788416	Kcnq5	LINE	Intron	non_coding_transcript_variant	0	0	21790645	2229	upstream	intronic	-3.7566	0.001	0.0135	0.186	|	0.276692	0.00481	0.00397	0.931	|	0	10	0	1	15	0.0666667	1	27	0.037037	0	21	0	0	18	0	0	22	0	|	0	7	0	0	12	0
chr1	21788461	-	T	chr1:21788461	Kcnq5	LINE	Intron	non_coding_transcript_variant	0	0	21787070	1391	downstream	intronic	-3.87139	0.001	0.0146	0.189	|	-2.46027	0.00464	0.0255	0.49	|	1	11	0.0909091	0	17	0	1	29	0.0344828	0	12	0	0	18	0	0	18	0	|	1	12	0.0833333	0	11	0
chr1	21806351	-	T	chr1:21806351	Kcnq5	LINE	Intron	non_coding_transcript_variant	0	0	-	-	-	-	3.20805	0.034	0.00368	0.23	|	-0.348279	0.00934	0.0119	0.893	|	0	53	0	2	40	0.05	0	56	0	2	64	0.03125	2	48	0.0416667	1	33	0.030303	|	2	36	0.0555556	0	17	0
chr1	21806366	-	T	chr1:21806366	Kcnq5	LINE	Intron	non_coding_transcript_variant	0	0	-	-	-	-	2.3007	0.0149	0.00303	0.416	|	-1.01238	0.0112	0.0226	0.742	|	0	41	0	1	36	0.0277778	0	46	0	4	56	0.0714286	2	43	0.0465116	0	31	0	|	2	23	0.0869565	2	15	0.133333
chr1	21845780	-	T	chr1:21845780	Kcnq5	SINE	Intron	non_coding_transcript_variant	0	0	-	-	-	-	0.142059	0.121	0.11	0.818	|	-1.48322	0.0243	0.0679	0.589	|	2	28	0.0714286	2	25	0.08	9	39	0.230769	4	35	0.114286	6	43	0.139535	4	36	0.111111	|	1	19	0.0526316	2	14	0.142857
chr1	21845781	-	T	chr1:21845781	Kcnq5	SINE	Intron	non_coding_transcript_variant	0	0	-	-	-	-	-0.839079	0.0605	0.108	0.343	|	2.05997	0.06	0.0144	0.401	|	3	28	0.107143	2	26	0.0769231	6	39	0.153846	2	35	0.0571429	6	43	0.139535	1	36	0.0277778	|	0	19	0	1	14	0.0714286
chr1	21902817	-	T	chr1:21902817	Kcnq5	LINE	Intron	non_coding_transcript_variant	0	0	-	-	-	-	-1.68569	0.00247	0.00796	0.45	|	0.97871	0.02	0.0102	0.62	|	0	65	0	1	65	0.0153846	2	61	0.0327869	1	66	0.0151515	0	65	0	0	47	0	|	1	39	0.025641	2	49	0.0408163
chr1	21904113	-	T	chr1:21904113	Kcnq5	LINE	Intron	non_coding_transcript_variant	0	0	-	-	-	-	0.319623	0.0903	0.0724	0.564	|	3.7093	0.0597	0.00457	0.227	|	3	58	0.0517241	5	66	0.0757576	9	93	0.0967742	9	60	0.15	7	77	0.0909091	2	37	0.0540541	|	0	35	0	0	34	0
chr1	21906174	-	T	chr1:21906174	Kcnq5	LTR	Intron	non_coding_transcript_variant	0	0	-	-	-	-	-1.90428	0.00955	0.0357	0.368	|	3.6407	0.0589	0.00472	0.241	|	1	32	0.03125	3	38	0.0789474	1	54	0.0185185	0	52	0	1	41	0.0243902	1	28	0.0357143	|	0	27	0	2	19	0.105263
chr1	21935249	-	T	chr1:21935249	Kcnq5	SINE	Intron	non_coding_transcript_variant	1	1	-	-	-	-	1.01017	0.184	0.0911	0.246	|	-0.187663	0.105	0.12	0.883	|	1	25	0.04	8	45	0.177778	5	47	0.106383	4	28	0.142857	7	28	0.25	9	52	0.173077	|	2	26	0.0769231	4	29	0.137931
chr1	21935256	-	T	chr1:21935256	Kcnq5	SINE	Intron	non_coding_transcript_variant	1	1	-	-	-	-	-0.0102311	0.672	0.677	0.917	|	-0.335087	0.538	0.678	0.065	|	16	24	0.666667	32	48	0.666667	30	43	0.697674	18	30	0.6	19	26	0.730769	36	52	0.692308	|	16	26	0.615385	22	31	0.709677
chr1	21935262	-	T	chr1:21935262	Kcnq5	SINE	Intron	non_coding_transcript_variant	1	1	21935867	605	upstream	intronic	1.76703	0.0175	0.00515	0.604	|	2.39125	0.0658	0.0125	0.322	|	0	22	0	6	44	0.136364	0	43	0	2	31	0.0645161	0	26	0	4	48	0.0833333	|	0	27	0	1	29	0.0344828
chr1	21935274	-	T	chr1:21935274	Kcnq5	SINE	Intron	non_coding_transcript_variant	0	0	21935856	582	upstream	intronic	-0.270571	0.164	0.198	0.673	|	0.614133	0.259	0.169	0.377	|	5	27	0.185185	15	46	0.326087	6	47	0.12766	3	34	0.0882353	6	26	0.230769	11	51	0.215686	|	3	30	0.1	8	29	0.275862
chr1	21935275	-	T	chr1:21935275	Kcnq5	SINE	Intron	non_coding_transcript_variant	0	0	21935855	580	upstream	intronic	-1.28939	0.0165	0.0404	0.598	|	-0.768416	0.012	0.0205	0.803	|	1	28	0.0357143	2	46	0.0434783	2	47	0.0425532	0	34	0	3	26	0.115385	2	51	0.0392157	|	0	31	0	2	29	0.0689655
chr1	23875131	-	T	chr1:23875131	Smap1	LTR	Intron	non_coding_transcript_variant	1	1	-	-	-	-	-0.0616773	0.0123	0.0128	0.982	|	-1.6461	0.00425	0.0133	0.59	|	1	25	0.04	1	19	0.0526316	0	47	0	1	27	0.037037	1	20	0.05	0	44	0	|	2	32	0.0625	0	10	0
chr1	23875183	+	A	chr1:23875183	Smap1	LTR	Intron	non_coding_transcript_variant	0	0	-	-	-	-	3.73854	0.0133	0.001	0.187	|	-1.78492	0.00315	0.0109	0.497	|	0	27	0	0	17	0	0	44	0	0	33	0	2	29	0.0689655	1	29	0.0344828	|	1	34	0.0294118	0	11	0
chr1	23875190	-	T	chr1:23875190	Smap1	LTR	Intron	non_coding_transcript_variant	0	0	-	-	-	-	-1.44183	0.017	0.0462	0.561	|	0.473445	0.0754	0.0543	0.555	|	1	25	0.04	2	18	0.111111	1	45	0.0222222	0	35	0	2	29	0.0689655	2	28	0.0714286	|	1	34	0.0294118	1	12	0.0833333
chr1	23875255	-	T	chr1:23875255	Smap1	LTR	Intron	non_coding_transcript_variant	0	0	-	-	-	-	2.36477	0.0184	0.00357	0.45	|	0.0566417	0.00454	0.00437	0.986	|	0	31	0	0	21	0	2	44	0.0454545	2	42	0.047619	0	26	0	3	23	0.130435	|	0	37	0	0	19	0
chr1	23875257	-	T	chr1:23875257	Smap1	LTR	Intron	non_coding_transcript_variant	0	0	-	-	-	-	-0.179789	0.371	0.42	0.642	|	-1.08514	0.014	0.0297	0.758	|	14	31	0.451613	8	21	0.380952	19	44	0.431818	15	43	0.348837	7	27	0.259259	13	23	0.565217	|	2	36	0.0555556	0	20	0
chr1	23875266	-	T	chr1:23875266	Smap1	LTR	Intron	non_coding_transcript_variant	0	0	23875882	616	upstream	intronic	2.63563	0.101	0.0163	0.32	|	-1.95944	0.015	0.0583	0.428	|	2	33	0.0606061	0	24	0	3	42	0.0714286	2	42	0.047619	3	25	0.12	4	22	0.181818	|	2	36	0.0555556	1	17	0.0588235
chr1	24032167	-	T	chr1:24032167	Fam135a	SINE	Intron	NMD_transcript_variant	0	0	-	-	-	-	-1.76612	0.00389	0.0132	0.55	|	6.55169	0.0938	0.001	0.00409	|	1	18	0.0555556	1	24	0.0416667	0	20	0	0	22	0	0	17	0	1	17	0.0588235	|	0	8	0	0	11	0
chr1	24051529	-	T	chr1:24051529	Fam135a	SINE	Intron	NMD_transcript_variant	0	0	24050606	923	downstream	intronic	0.375177	0.854	0.659	0.233	|	1.72331	0.693	0.21	0.182	|	4	6	0.666667	12	14	0.857143	6	12	0.5	6	7	0.857143	10	11	0.909091	4	5	0.8	|	1	12	0.0833333	1	6	0.166667
chr1	24052688	-	T	chr1:24052688	Fam135a	SINE	Intron	non_coding_transcript_exon_variant	0	0	24051452	1236	downstream	intronic	0.41296	0.264	0.198	0.52	|	-5.36393	0.00511	0.21	0.149	|	5	16	0.3125	4	16	0.25	3	30	0.1	7	30	0.233333	5	24	0.208333	11	29	0.37931	|	4	25	0.16	4	18	0.222222
chr1	25196415	-	T	chr1:25196415	Adgrb3	SINE	Intron	non_coding_transcript_variant	0	0	-	-	-	-	0.0287189	0.00987	0.00968	0.991	|	-1.75934	0.00357	0.0121	0.531	|	1	46	0.0217391	1	24	0.0416667	0	50	0	1	40	0.025	0	26	0	1	26	0.0384615	|	1	21	0.047619	0	11	0
chr1	25196433	-	T	chr1:25196433	Adgrb3	SINE	Intron	non_coding_transcript_variant	0	0	-	-	-	-	-3.41	0.00434	0.0461	0.246	|	0.251015	0.0163	0.0137	0.933	|	2	48	0.0416667	1	34	0.0294118	4	50	0.08	4	49	0.0816327	0	24	0	0	29	0	|	1	23	0.0434783	0	16	0
chr1	25196437	-	T	chr1:25196437	Adgrb3	SINE	Intron	non_coding_transcript_variant	0	0	-	-	-	-	-3.63872	0.00397	0.0494	0.205	|	-3.80267	0.001	0.014	0.184	|	4	45	0.0888889	1	32	0.03125	2	46	0.0434783	3	48	0.0625	0	24	0	0	27	0	|	1	23	0.0434783	1	16	0.0625
chr1	25196445	-	T	chr1:25196445	Adgrb3	SINE	Intron	non_coding_transcript_variant	0	0	-	-	-	-	-0.18127	0.015	0.0171	0.953	|	-0.150999	0.0137	0.0152	0.959	|	2	39	0.0512821	3	31	0.0967742	0	39	0	4	47	0.0851064	0	22	0	1	25	0.04	|	1	22	0.0454545	1	13	0.0769231
chr1	25196449	-	T	chr1:25196449	Adgrb3	SINE	Intron	non_coding_transcript_variant	0	0	-	-	-	-	-1.71948	0.00461	0.0152	0.603	|	0.451212	0.00481	0.00352	0.884	|	0	40	0	5	34	0.147059	1	42	0.0238095	5	51	0.0980392	0	25	0	0	22	0	|	1	23	0.0434783	0	15	0
chr1	25196457	-	T	chr1:25196457	Adgrb3	SINE	Intron	non_coding_transcript_variant	0	0	-	-	-	-	0	0.001	0.001	---	|	4.19724	0.0183	0.001	0.184	|	0	41	0	0	36	0	0	38	0	0	48	0	0	22	0	0	20	0	|	0	21	0	0	15	0
chr1	25392173	-	T	chr1:25392173	Adgrb3	LINE	Intron	intron_variant	0	0	25390147	2026	downstream	intronic	-2.38614	0.001	0.00523	0.423	|	0.333333	0.00523	0.00415	0.921	|	2	14	0.142857	0	7	0	0	11	0	0	26	0	0	12	0	0	13	0	|	0	10	0	0	7	0
chr1	25392188	-	T	chr1:25392188	Adgrb3	LINE	Intron	intron_variant	0	0	25390131	2057	downstream	intronic	0	0.001	0.001	---	|	-2.09779	0.005	0.0214	0.552	|	0	11	0	0	10	0	0	14	0	0	24	0	0	12	0	0	14	0	|	0	12	0	1	6	0.166667
chr1	25393714	-	T	chr1:25393714	Adgrb3	LINE	Intron	intron_variant	0	0	-	-	-	-	4.70807	0.0261	0.001	0.184	|	0	0.00567	0.00567	1	|	0	12	0	0	13	0	0	18	0	1	7	0.142857	0	12	0	1	8	0.125	|	2	11	0.181818	0	8	0
chr1	25393743	-	T	chr1:25393743	Adgrb3	LINE	Intron	intron_variant	0	0	-	-	-	-	4.68707	0.0258	0.001	0.188	|	-2.46027	0.001	0.0055	0.423	|	0	9	0	0	11	0	0	19	0	2	9	0.222222	0	9	0	1	13	0.0769231	|	0	8	0	1	6	0.166667
chr1	25393749	-	T	chr1:25393749	Adgrb3	LINE	Intron	intron_variant	0	0	-	-	-	-	-0.866487	0.0215	0.0393	0.815	|	-4.58721	0.001	0.024	0.186	|	2	9	0.222222	3	11	0.272727	0	18	0	1	10	0.1	1	10	0.1	0	13	0	|	0	9	0	1	6	0.166667
chr1	25602844	-	T	chr1:25602844	Adgrb3	LINE	Intron	non_coding_transcript_variant	0	0	-	-	-	-	-2.29277	0.00464	0.0227	0.508	|	-2.26529	0.001	0.00481	0.423	|	0	5	0	2	17	0.117647	1	10	0.1	1	10	0.1	0	7	0	0	8	0	|	0	17	0	1	9	0.111111
chr1	25602854	-	T	chr1:25602854	Adgrb3	LINE	Intron	non_coding_transcript_variant	0	0	-	-	-	-	-1.71459	0.00659	0.0216	0.652	|	-6.54666	0.001	0.0935	0.00198	|	0	6	0	2	18	0.111111	1	11	0.0909091	0	8	0	0	6	0	2	7	0.285714	|	1	16	0.0625	1	9	0.111111
chr1	25636131	-	T	chr1:25636131	Adgrb3	LINE	Intron	non_coding_transcript_variant	0	0	-	-	-	-	-2.30903	0.00279	0.0138	0.41	|	-2.87995	0.00303	0.0223	0.36	|	3	27	0.111111	0	28	0	1	42	0.0238095	0	43	0	1	46	0.0217391	0	28	0	|	2	19	0.105263	2	19	0.105263
chr1	25636133	-	T	chr1:25636133	Adgrb3	LINE	Intron	non_coding_transcript_variant	0	0	-	-	-	-	0.0320373	0.0446	0.0436	0.964	|	-5.9082	0.001	0.0601	0.00547	|	2	25	0.08	1	26	0.0384615	1	37	0.027027	1	40	0.025	2	45	0.0444444	2	25	0.08	|	2	19	0.105263	1	18	0.0555556
chr1	25636187	-	T	chr1:25636187	Adgrb3	LINE	Intron	non_coding_transcript_variant	0	0	-	-	-	-	4.84505	0.0287	0.001	0.00319	|	5.84005	0.0573	0.001	0.00617	|	0	31	0	0	30	0	0	51	0	1	45	0.0222222	1	39	0.025641	1	24	0.0416667	|	0	19	0	0	18	0
chr1	25642407	-	T	chr1:25642407	Adgrb3	LINE	Intron	non_coding_transcript_variant	0	0	-	-	-	-	-2.47378	0.00428	0.0238	0.359	|	0.547182	0.00431	0.00295	0.846	|	1	33	0.030303	1	46	0.0217391	1	49	0.0204082	4	51	0.0784314	0	37	0	0	39	0	|	0	16	0	0	14	0
chr1	25769630	-	T	chr1:25769630	Adgrb3	LINE	Intron	non_coding_transcript_variant	0	0	-	-	-	-	3.00225	0.0213	0.00266	0.159	|	2.30965	0.0463	0.00935	0.286	|	0	53	0	0	52	0	1	53	0.0188679	1	72	0.0138889	3	81	0.037037	1	53	0.0188679	|	1	35	0.0285714	0	34	0
chr1	25769638	-	T	chr1:25769638	Adgrb3	LINE	Intron	non_coding_transcript_variant	0	0	-	-	-	-	2.2752	0.0132	0.00273	0.393	|	-5.09479	0.001	0.0342	0.00147	|	1	49	0.0204082	0	47	0	0	51	0	3	72	0.0416667	4	72	0.0555556	0	47	0	|	1	33	0.030303	1	34	0.0294118
chr1	25769652	-	T	chr1:25769652	Adgrb3	LINE	Intron	non_coding_transcript_variant	0	0	-	-	-	-	1.2999	0.00246	0.001	0.423	|	-1.88874	0.00268	0.00992	0.452	|	0	44	0	0	46	0	0	53	0	1	67	0.0149254	0	67	0	0	44	0	|	2	32	0.0625	0	32	0
chr1	25769727	-	T	chr1:25769727	Adgrb3	LINE	Intron	non_coding_transcript_variant	0	0	-	-	-	-	1.92195	0.0114	0.003	0.464	|	0.259203	0.00362	0.00303	0.921	|	0	28	0	0	39	0	1	37	0.027027	0	36	0	1	34	0.0294118	1	20	0.05	|	0	11	0	0	22	0
chr1	25770421	-	T	chr1:25770421	Adgrb3	LINE	Intron	non_coding_transcript_variant	0	0	-	-	-	-	-0.621652	0.0382	0.0588	0.458	|	-0.253123	0.00974	0.0116	0.924	|	6	64	0.09375	5	53	0.0943396	2	87	0.0229885	2	65	0.0307692	2	45	0.0444444	2	49	0.0408163	|	0	43	0	2	36	0.0555556
chr1	25770532	-	T	chr1:25770532	Adgrb3	LINE	Intron	non_coding_transcript_variant	0	0	25772673	2141	upstream	intronic	3.02974	0.0301	0.00368	0.248	|	4.14186	0.063	0.00357	0.144	|	0	30	0	2	40	0.05	0	66	0	2	54	0.037037	1	34	0.0294118	1	40	0.025	|	0	35	0	0	18	0
chr1	25770533	-	T	chr1:25770533	Adgrb3	LINE	Intron	non_coding_transcript_variant	0	0	-	-	-	-	-0.319786	0.0538	0.0672	0.548	|	-2.21114	0.0113	0.0525	0.337	|	2	30	0.0666667	4	40	0.1	3	66	0.0454545	2	55	0.0363636	3	35	0.0857143	2	40	0.05	|	2	35	0.0571429	2	18	0.111111
chr1	32246078	+	A	chr1:32246078	Khdrbs2	LTR	UTR	3_prime_UTR_variant	0	0	-	-	-	-	-1.73129	0.012	0.04	0.437	|	-0.0229825	0.0149	0.0152	0.994	|	2	38	0.0526316	1	35	0.0285714	2	47	0.0425532	1	22	0.0454545	0	41	0	1	26	0.0384615	|	2	22	0.0909091	0	21	0
chr1	32246197	+	A	chr1:32246197	Khdrbs2	LTR	UTR	3_prime_UTR_variant	0	0	-	-	-	-	0.552371	0.0124	0.00848	0.829	|	3.81393	0.0481	0.00342	0.156	|	0	38	0	1	41	0.0243902	1	40	0.025	1	26	0.0384615	3	60	0.05	0	40	0	|	0	27	0	1	25	0.04
chr1	33769476	-	T	chr1:33769476	Zfp451	SINE	Intron	NMD_transcript_variant	1	1	-	-	-	-	-3.51692	0.0138	0.158	0.203	|	-0.987825	0.0176	0.035	0.78	|	1	9	0.111111	3	16	0.1875	4	21	0.190476	0	10	0	1	21	0.047619	1	18	0.0555556	|	1	5	0.2	0	8	0
chr1	33795199	-	T	chr1:33795199	Zfp451	SINE	UTR	3_prime_UTR_variant	1	1	-	-	-	-	0.448604	0.0633	0.0464	0.661	|	0.454276	0.0748	0.0546	0.576	|	6	55	0.109091	2	85	0.0235294	3	77	0.038961	6	62	0.0967742	7	65	0.107692	1	41	0.0243902	|	2	91	0.021978	6	66	0.0909091
chr1	33795208	-	T	chr1:33795208	Zfp451	SINE	UTR	3_prime_UTR_variant	1	1	-	-	-	-	0.806852	0.0966	0.0552	0.297	|	-0.0512029	0.0859	0.089	0.908	|	8	66	0.121212	3	92	0.0326087	4	94	0.0425532	8	78	0.102564	6	67	0.0895522	5	51	0.0980392	|	6	101	0.0594059	8	69	0.115942
chr1	33796391	-	T	chr1:33796391	Zfp451	SINE	UTR	3_prime_UTR_variant	0	0	-	-	-	-	1.21968	0.0388	0.0167	0.617	|	1.82137	0.0566	0.016	0.46	|	0	65	0	4	72	0.0555556	7	84	0.0833333	4	69	0.057971	4	65	0.0615385	1	61	0.0163934	|	3	43	0.0697674	0	33	0
chr1	33796409	-	T	chr1:33796409	Zfp451	SINE	UTR	3_prime_UTR_variant	0	0	-	-	-	-	1.21343	0.0404	0.0174	0.622	|	-5.30952	0.001	0.0397	0.00391	|	5	63	0.0793651	5	75	0.0666667	0	81	0	5	70	0.0714286	1	58	0.0172414	3	56	0.0535714	|	1	37	0.027027	1	26	0.0384615
chr1	33796747	-	T	chr1:33796747	Zfp451	SINE	UTR	3_prime_UTR_variant	0	0	-	-	-	-	0.702343	0.0516	0.0317	0.108	|	0.265945	0.0206	0.0172	0.789	|	3	89	0.0337079	2	88	0.0227273	4	96	0.0416667	4	84	0.047619	7	101	0.0693069	3	72	0.0416667	|	2	108	0.0185185	2	74	0.027027
chr1	34834411	-	T	chr1:34834411	Fam168b	SINE	Intron	non_coding_transcript_variant	0	0	-	-	-	-	-4.10685	0.001	0.0172	0.189	|	-2.42178	0.001	0.00536	0.423	|	2	17	0.117647	1	23	0.0434783	0	16	0	0	15	0	0	17	0	0	12	0	|	2	13	0.153846	0	10	0
chr1	34835604	-	T	chr1:34835604	Fam168b	SINE	Intron	non_coding_transcript_variant	0	0	-	-	-	-	-0.577897	0.382	0.57	0.435	|	-3.4271	0.0457	0.491	0.34	|	5	16	0.3125	8	9	0.888889	10	15	0.666667	7	11	0.636364	7	16	0.4375	2	10	0.2	|	4	9	0.444444	6	10	0.6
chr1	34835608	-	T	chr1:34835608	Fam168b	SINE	Intron	non_coding_transcript_variant	0	0	34834399	1209	downstream	intronic	-1.6863	0.05	0.161	0.615	|	-0.526179	0.215	0.309	0.37	|	1	16	0.0625	2	8	0.25	4	15	0.266667	4	10	0.4	5	16	0.3125	0	10	0	|	3	9	0.333333	4	10	0.4
chr1	36366300	-	T	chr1:36366300	Kansl3	SINE	Intron	non_coding_transcript_exon_variant	1	1	-	-	-	-	-0.12147	0.0232	0.0252	0.974	|	2.55279	0.0272	0.00464	0.48	|	7	15	0.466667	0	8	0	1	29	0.0344828	0	15	0	2	24	0.0833333	3	20	0.15	|	0	9	0	0	6	0
chr1	37984005	-	T	chr1:37984005	Txndc9	SINE	intergenic	downstream_gene_variant	1	1	-	-	-	-	0.0963432	0.148	0.138	0.929	|	-4.46156	0.001	0.022	0.184	|	1	21	0.047619	1	6	0.166667	2	6	0.333333	1	15	0.0666667	4	15	0.266667	2	11	0.181818	|	0	7	0	1	11	0.0909091
chr1	38100331	-	T	chr1:38100331	Rev1	DNA	Intron	intron_variant	0	0	-	-	-	-	2.26529	0.00481	0.001	0.423	|	0.314472	0.00425	0.00342	0.914	|	0	23	0	0	7	0	0	7	0	0	10	0	1	9	0.111111	0	10	0	|	0	9	0	0	10	0
chr1	38100339	-	T	chr1:38100339	Rev1	DNA	Intron	intron_variant	0	0	-	-	-	-	-1.3726	0.00737	0.0191	0.726	|	-4.44887	0.001	0.0218	0.198	|	1	24	0.0416667	0	7	0	1	6	0.166667	0	9	0	4	10	0.4	0	10	0	|	2	8	0.25	0	10	0
chr1	38100378	-	T	chr1:38100378	Rev1	DNA	Intron	intron_variant	0	0	-	-	-	-	-0.735484	0.0177	0.0295	0.831	|	-0.528321	0.00405	0.00585	0.879	|	0	23	0	1	9	0.111111	3	13	0.230769	1	18	0.0555556	1	10	0.1	0	9	0	|	0	6	0	0	7	0
chr1	38522654	-	T	chr1:38522654	Aff3	.	Intron	non_coding_transcript_variant	0	0	-	-	-	-	-1.39481	0.001	0.00263	0.423	|	1.87492	0.0187	0.00511	0.588	|	0	30	0	0	21	0	1	55	0.0181818	0	25	0	0	21	0	0	17	0	|	2	15	0.133333	0	16	0
chr1	39382016	-	T	chr1:39382016	Tbc1d8	SINE	Intron	NMD_transcript_variant	1	1	39384096	2080	upstream	intronic	0.350822	0.0333	0.0261	0.925	|	2.16878	0.0045	0.001	0.423	|	1	7	0.142857	1	8	0.125	0	12	0	2	6	0.333333	1	9	0.111111	0	14	0	|	0	6	0	0	12	0
chr1	39382020	-	T	chr1:39382020	Tbc1d8	SINE	Intron	NMD_transcript_variant	0	0	39384092	2072	upstream	intronic	-0.992427	0.0199	0.0397	0.787	|	-5.3181	0.0063	0.251	0.179	|	0	7	0	2	8	0.25	3	12	0.25	0	7	0	1	9	0.111111	1	14	0.0714286	|	3	6	0.5	2	9	0.222222
chr1	39382021	-	T	chr1:39382021	Tbc1d8	SINE	Intron	NMD_transcript_variant	0	0	39384091	2070	upstream	intronic	2.92204	0.166	0.0218	0.319	|	-3.3726	0.00464	0.0481	0.4	|	0	7	0	1	8	0.125	1	12	0.0833333	2	7	0.285714	2	9	0.222222	1	14	0.0714286	|	2	6	0.333333	3	9	0.333333
chr1	39382022	-	T	chr1:39382022	Tbc1d8	SINE	Intron	NMD_transcript_variant	1	1	39384090	2068	upstream	intronic	0.592536	0.00659	0.00437	0.873	|	-2.6318	0.00585	0.0362	0.511	|	0	7	0	0	8	0	1	12	0.0833333	2	7	0.285714	0	9	0	0	14	0	|	2	6	0.333333	0	9	0
chr1	39382033	-	T	chr1:39382033	Tbc1d8	SINE	Intron	NMD_transcript_variant	0	0	-	-	-	-	-2.16878	0.001	0.0045	0.423	|	-2.46027	0.001	0.0055	0.423	|	0	7	0	0	8	0	1	11	0.0909091	0	7	0	0	9	0	0	14	0	|	1	6	0.166667	0	7	0
chr1	42664340	-	T	chr1:42664340	Pantr1	SINE	Intron	non_coding_transcript_variant	0	0	-	-	-	-	-1.95944	0.001	0.00389	0.423	|	2.54795	0.00585	0.001	0.423	|	0	26	0	0	13	0	1	17	0.0588235	0	24	0	0	8	0	0	16	0	|	0	9	0	0	9	0
chr1	42666398	-	T	chr1:42666398	Pantr1	SINE	Intron	non_coding_transcript_variant	0	0	42664307	2091	downstream	intronic	0.322526	0.0144	0.0115	0.91	|	-0.236831	0.00382	0.0045	0.939	|	1	44	0.0227273	0	18	0	2	30	0.0666667	1	27	0.037037	0	29	0	2	25	0.08	|	0	16	0	0	14	0
chr1	42682636	-	T	chr1:42682636	Pantr1	.	Intron	non_coding_transcript_variant	0	0	42683419	783	upstream	intronic	0	0.001	0.001	---	|	-2.43427	0.00382	0.0206	0.457	|	0	8	0	0	15	0	0	20	0	0	10	0	0	12	0	0	14	0	|	0	23	0	1	19	0.0526316
chr1	42682639	-	T	chr1:42682639	Pantr1	.	Intron	non_coding_transcript_variant	0	0	42683416	777	upstream	intronic	-1.73213	0.00567	0.0188	0.628	|	-0.559793	0.0208	0.0307	0.879	|	0	8	0	2	15	0.133333	1	20	0.05	0	10	0	2	11	0.181818	0	14	0	|	4	23	0.173913	0	19	0
chr1	42682641	-	T	chr1:42682641	Pantr1	.	Intron	non_coding_transcript_variant	0	0	42683414	773	upstream	intronic	-1.88129	0.001	0.00368	0.423	|	0	0.001	0.001	---	|	0	8	0	0	15	0	1	20	0.05	0	10	0	0	11	0	0	14	0	|	0	24	0	0	19	0
chr1	42682673	-	T	chr1:42682673	Pantr1	.	Intron	non_coding_transcript_variant	0	0	-	-	-	-	5.42739	0.174	0.00405	0.108	|	-0.34414	0.00511	0.00648	0.928	|	0	11	0	1	15	0.0666667	0	24	0	1	11	0.0909091	3	14	0.214286	3	11	0.272727	|	0	23	0	0	19	0
chr1	42682674	-	T	chr1:42682674	Pantr1	.	Intron	non_coding_transcript_variant	0	0	-	-	-	-	0.408356	0.0187	0.0141	0.893	|	-3.98286	0.001	0.0158	0.187	|	0	11	0	1	15	0.0666667	1	24	0.0416667	0	11	0	1	14	0.0714286	1	11	0.0909091	|	1	23	0.0434783	0	19	0
chr1	42683404	-	T	chr1:42683404	Pantr1	.	Intron	non_coding_transcript_variant	0	0	42682651	753	downstream	intronic	-4.36623	0.001	0.0206	0.19	|	4.46725	0.103	0.00464	0.177	|	1	19	0.0526316	0	6	0	2	12	0.166667	0	10	0	0	10	0	0	7	0	|	0	8	0	0	10	0
chr1	42683412	-	T	chr1:42683412	Pantr1	.	Intron	non_coding_transcript_variant	0	0	42682643	769	downstream	intronic	-0.156495	0.00481	0.00536	0.965	|	-0.0965022	0.0045	0.00481	0.977	|	0	20	0	0	6	0	2	13	0.153846	1	9	0.111111	0	9	0	0	7	0	|	0	8	0	0	9	0
chr1	43808628	-	T	chr1:43808628	Uxs1	SINE	Intron	non_coding_transcript_variant	0	0	43808266	362	downstream	intronic	0.460872	0.281	0.204	0.563	|	-1.21002	0.0285	0.0659	0.772	|	1	11	0.0909091	2	8	0.25	3	8	0.375	6	18	0.333333	1	6	0.166667	2	5	0.4	|	8	12	0.666667	3	7	0.428571
chr1	43808632	-	T	chr1:43808632	Uxs1	SINE	Intron	non_coding_transcript_variant	0	0	43808261	371	downstream	intronic	1.05067	0.265	0.128	0.153	|	2.24159	0.0268	0.00567	0.551	|	1	12	0.0833333	2	8	0.25	1	10	0.1	5	18	0.277778	2	6	0.333333	1	5	0.2	|	2	11	0.181818	0	6	0
chr1	43808636	-	T	chr1:43808636	Uxs1	SINE	Intron	non_coding_transcript_variant	0	0	43808257	379	downstream	intronic	1.52832	0.464	0.161	0.0675	|	-0.885349	0.0307	0.0567	0.832	|	1	12	0.0833333	2	8	0.25	2	10	0.2	9	18	0.5	2	6	0.333333	3	5	0.6	|	2	11	0.181818	6	6	1
chr1	43808646	-	T	chr1:43808646	Uxs1	SINE	Intron	non_coding_transcript_variant	0	0	43808277	369	downstream	intronic	0.252227	0.493	0.414	0.61	|	2.7057	0.552	0.0846	0.488	|	3	12	0.25	5	8	0.625	5	11	0.454545	9	20	0.45	4	6	0.666667	2	5	0.4	|	8	11	0.727273	5	6	0.833333
chr1	50996601	+	A	chr1:50996601	Tmeff2	LINE	Intron	intron_variant	0	0	50996872	271	downstream	intronic	0.357502	0.146	0.114	0.605	|	-2.12694	0.001	0.00437	0.423	|	3	35	0.0857143	5	29	0.172414	4	40	0.1	6	22	0.272727	2	27	0.0740741	4	26	0.153846	|	2	24	0.0833333	0	36	0
chr1	51021070	+	A	chr1:51021070	Tmeff2	LINE	Intron	intron_variant	0	0	-	-	-	-	-0.239964	0.0207	0.0245	0.944	|	1.98859	0.0232	0.00585	0.594	|	0	9	0	3	17	0.176471	1	12	0.0833333	1	14	0.0714286	0	17	0	1	8	0.125	|	0	10	0	1	5	0.2
chr1	51027699	+	A	chr1:51027699	Tmeff2	.	Intron	intron_variant	0	0	51028866	1167	downstream	intronic	-2.50212	0.001	0.00567	0.423	|	2.21462	0.00464	0.001	0.423	|	2	11	0.181818	0	6	0	0	17	0	0	13	0	0	11	0	0	7	0	|	0	10	0	0	8	0
chr1	51027704	+	A	chr1:51027704	Tmeff2	.	Intron	intron_variant	0	0	51028861	1157	downstream	intronic	0.345509	0.0234	0.0184	0.917	|	2.9603	0.212	0.0272	0.344	|	0	13	0	1	8	0.125	1	20	0.05	2	13	0.153846	1	12	0.0833333	0	7	0	|	1	11	0.0909091	2	9	0.222222
chr1	51027706	+	A	chr1:51027706	Tmeff2	.	Intron	intron_variant	0	0	51028859	1153	downstream	intronic	2.08845	0.00425	0.001	0.423	|	2.36377	0.0357	0.00693	0.568	|	0	13	0	0	8	0	0	22	0	1	13	0.0769231	0	12	0	0	7	0	|	0	11	0	3	9	0.333333
chr1	51027708	+	A	chr1:51027708	Tmeff2	.	Intron	intron_variant	0	0	51028857	1149	downstream	intronic	0.447985	0.00613	0.0045	0.902	|	0.262436	0.371	0.309	0.569	|	0	13	0	0	8	0	2	22	0.0909091	3	13	0.230769	0	12	0	0	7	0	|	4	12	0.333333	4	9	0.444444
chr1	51027713	+	A	chr1:51027713	Tmeff2	.	Intron	intron_variant	0	0	51028853	1140	downstream	intronic	-4.1933	0.0063	0.115	0.255	|	0.240822	0.0292	0.0247	0.947	|	2	14	0.142857	1	10	0.1	3	28	0.107143	3	12	0.25	0	12	0	0	8	0	|	1	12	0.0833333	2	11	0.181818
chr1	51027714	+	A	chr1:51027714	Tmeff2	.	Intron	intron_variant	0	0	51028852	1138	downstream	intronic	3.02423	0.0338	0.00415	0.412	|	-1.98262	0.0478	0.189	0.553	|	0	14	0	0	10	0	2	28	0.0714286	4	13	0.307692	0	12	0	1	8	0.125	|	2	12	0.166667	4	11	0.363636
chr1	51027723	+	A	chr1:51027723	Tmeff2	.	Intron	intron_variant	0	0	51028842	1119	downstream	intronic	2.08845	0.00425	0.001	0.423	|	2.08845	0.0234	0.0055	0.568	|	0	14	0	0	9	0	0	30	0	1	13	0.0769231	0	12	0	0	8	0	|	0	10	0	2	12	0.166667
chr1	51027728	+	A	chr1:51027728	Tmeff2	.	Intron	intron_variant	0	0	51028836	1108	downstream	intronic	0.678842	0.295	0.184	0.542	|	0.510515	0.45	0.316	0.507	|	1	15	0.0666667	3	9	0.333333	9	32	0.28125	6	13	0.461538	6	12	0.5	1	9	0.111111	|	4	10	0.4	6	12	0.5
chr1	51027729	+	A	chr1:51027729	Tmeff2	.	Intron	intron_variant	0	0	51028835	1106	downstream	intronic	-1.33482	0.0487	0.123	0.683	|	0.00202825	0.393	0.393	0.997	|	1	15	0.0666667	1	9	0.111111	8	32	0.25	4	13	0.307692	0	12	0	3	8	0.375	|	4	10	0.4	6	11	0.545455
chr1	51027735	+	A	chr1:51027735	Tmeff2	.	Intron	intron_variant	0	0	51028831	1096	downstream	intronic	-2.23831	0.0338	0.159	0.476	|	0.492135	0.441	0.314	0.478	|	2	15	0.133333	1	10	0.1	10	33	0.30303	4	13	0.307692	0	14	0	1	8	0.125	|	3	11	0.272727	7	13	0.538462
chr1	51027738	+	A	chr1:51027738	Tmeff2	.	Intron	intron_variant	0	0	51028829	1091	downstream	intronic	0	0.001	0.001	---	|	2.08845	0.0186	0.00437	0.524	|	0	16	0	0	10	0	0	33	0	0	13	0	0	13	0	0	8	0	|	1	12	0.0833333	0	13	0
chr1	51028812	+	A	chr1:51028812	Tmeff2	.	Intron	intron_variant	0	0	51028815	3	downstream	intronic	-2.90595	0.0191	0.143	0.308	|	1.8321	0.0935	0.0263	0.52	|	5	18	0.277778	3	19	0.157895	2	30	0.0666667	0	19	0	1	18	0.0555556	2	16	0.125	|	2	17	0.117647	2	13	0.153846
chr1	51028833	+	A	chr1:51028833	Tmeff2	.	Intron	intron_variant	0	0	51027732	1101	upstream	intronic	-1.60264	0.00585	0.0178	0.653	|	4.73911	0.0267	0.001	0.184	|	1	17	0.0588235	0	14	0	2	21	0.0952381	0	16	0	0	16	0	2	10	0.2	|	0	16	0	0	10	0
chr1	51028847	+	A	chr1:51028847	Tmeff2	.	Intron	intron_variant	0	0	51027720	1127	upstream	intronic	0.259203	0.0261	0.0218	0.941	|	2.14992	0.163	0.0368	0.505	|	1	12	0.0833333	0	10	0	2	16	0.125	3	14	0.214286	1	12	0.0833333	0	10	0	|	4	10	0.4	1	8	0.125
chr1	51028862	+	A	chr1:51028862	Tmeff2	.	Intron	intron_variant	0	0	51027703	1159	upstream	intronic	0.163951	0.0315	0.0281	0.965	|	-6.06104	0.00585	0.39	0.14	|	1	12	0.0833333	0	10	0	4	15	0.266667	1	8	0.125	0	11	0	2	8	0.25	|	5	12	0.416667	3	7	0.428571
chr1	51028864	+	A	chr1:51028864	Tmeff2	.	Intron	intron_variant	0	0	51027700	1164	upstream	intronic	-2.22328	0.0415	0.194	0.497	|	4.11339	0.0905	0.00523	0.226	|	4	11	0.363636	1	10	0.1	3	15	0.2	0	8	0	3	12	0.25	2	7	0.285714	|	0	12	0	0	7	0
chr1	51028867	+	A	chr1:51028867	Tmeff2	.	Intron	intron_variant	0	0	51027698	1169	upstream	intronic	-1.95944	0.001	0.00389	0.423	|	2.6863	0.0281	0.00437	0.452	|	0	12	0	0	10	0	1	17	0.0588235	0	7	0	0	12	0	0	8	0	|	1	12	0.0833333	0	6	0
chr1	51028869	+	A	chr1:51028869	Tmeff2	.	Intron	intron_variant	0	0	51027696	1173	upstream	intronic	-0.101618	0.228	0.245	0.928	|	0.280524	0.376	0.31	0.758	|	6	12	0.5	1	10	0.1	5	17	0.294118	4	7	0.571429	1	12	0.0833333	2	8	0.25	|	5	12	0.416667	3	6	0.5
chr1	51028871	+	A	chr1:51028871	Tmeff2	.	Intron	intron_variant	0	0	51027694	1177	upstream	intronic	-2.12694	0.001	0.00437	0.423	|	5.12908	0.193	0.0055	0.164	|	1	12	0.0833333	0	10	0	0	17	0	0	8	0	0	12	0	0	8	0	|	2	12	0.166667	0	6	0
chr1	51028881	+	A	chr1:51028881	Tmeff2	.	Intron	intron_variant	0	0	51027685	1196	upstream	intronic	-2.13561	0.00659	0.0289	0.59	|	0.240822	0.00669	0.00567	0.951	|	2	11	0.181818	0	8	0	2	15	0.133333	0	8	0	0	12	0	2	7	0.285714	|	2	11	0.181818	0	5	0
chr1	51028889	+	A	chr1:51028889	Tmeff2	.	Intron	intron_variant	0	0	51027677	1212	upstream	intronic	0.217359	0.00523	0.0045	0.95	|	0.379168	0.00585	0.0045	0.915	|	1	11	0.0909091	0	9	0	0	15	0	1	7	0.142857	0	12	0	0	6	0	|	1	11	0.0909091	0	5	0
chr1	51028890	+	A	chr1:51028890	Tmeff2	.	Intron	intron_variant	0	0	51027676	1214	upstream	intronic	0.129681	0.0288	0.0263	0.971	|	0.379168	0.00585	0.0045	0.915	|	1	11	0.0909091	0	9	0	3	15	0.2	1	7	0.142857	0	12	0	1	6	0.166667	|	1	11	0.0909091	0	5	0
chr1	51028902	+	A	chr1:51028902	Tmeff2	.	Intron	intron_variant	0	0	51027664	1238	upstream	intronic	-6.56835	0.001	0.0949	0.000576	|	-0.754345	0.005	0.00843	0.855	|	1	10	0.1	1	9	0.111111	1	13	0.0769231	0	7	0	0	12	0	0	6	0	|	0	8	0	3	5	0.6
chr1	51028926	+	A	chr1:51028926	Tmeff2	.	Intron	intron_variant	0	0	51027639	1287	upstream	intronic	2.43198	0.134	0.0247	0.406	|	2.01963	0.00405	0.001	0.423	|	2	12	0.166667	0	10	0	1	11	0.0909091	1	5	0.2	1	12	0.0833333	1	7	0.142857	|	0	8	0	0	7	0
chr1	51028927	+	A	chr1:51028927	Tmeff2	.	Intron	intron_variant	0	0	51027638	1289	upstream	intronic	-2.24292	0.00523	0.0247	0.538	|	0	0.001	0.001	---	|	2	12	0.166667	0	10	0	1	11	0.0909091	0	5	0	0	12	0	1	7	0.142857	|	0	8	0	0	7	0
chr1	51028928	+	A	chr1:51028928	Tmeff2	.	Intron	intron_variant	0	0	51027637	1291	upstream	intronic	-0.161809	0.00523	0.00585	0.965	|	2.54795	0.00585	0.001	0.423	|	0	11	0	0	10	0	2	10	0.2	0	5	0	0	12	0	1	7	0.142857	|	0	7	0	0	7	0
chr1	52187395	-	T	chr1:52187395	Gls	.	UTR	3_prime_UTR_variant	0	0	52187409	14	upstream	UTR	-0.909332	0.00581	0.0109	0.697	|	1.49635	0.0131	0.00465	0.328	|	2	71	0.028169	3	65	0.0461538	0	123	0	1	56	0.0178571	1	91	0.010989	0	79	0	|	1	155	0.00645161	0	94	0
chr1	54397335	-	T	chr1:54397335	Gtf3c3	SINE	UTR	3_prime_UTR_variant	0	0	-	-	-	-	-1.78662	0.00992	0.0342	0.397	|	-4.55143	0.0026	0.0609	0.0631	|	3	52	0.0576923	1	48	0.0208333	2	60	0.0333333	0	66	0	1	41	0.0243902	2	50	0.04	|	2	73	0.0273973	4	34	0.117647
chr1	54488746	-	T	chr1:54488746	Pgap1	LTR	Intron	intron_variant	0	0	-	-	-	-	0.574789	0.194	0.13	0.552	|	3.15996	0.225	0.0252	0.312	|	1	20	0.05	5	19	0.263158	3	18	0.166667	5	23	0.217391	2	20	0.1	5	15	0.333333	|	1	13	0.0769231	0	10	0
chr1	54646217	-	T	chr1:54646217	Ankrd44	.	UTR	3_prime_UTR_variant	0	0	-	-	-	-	1.8671	0.0456	0.0125	0.414	|	3.49617	0.0416	0.00368	0.202	|	3	57	0.0526316	1	27	0.037037	0	37	0	3	71	0.0422535	2	47	0.0425532	2	38	0.0526316	|	0	38	0	0	16	0
chr1	54646250	-	T	chr1:54646250	Ankrd44	.	UTR	3_prime_UTR_variant	0	0	-	-	-	-	1.56837	0.0302	0.0102	0.473	|	3.51622	0.0357	0.00312	0.164	|	1	59	0.0169492	1	16	0.0625	0	37	0	1	66	0.0151515	3	47	0.0638298	1	35	0.0285714	|	0	34	0	0	19	0
chr1	55009002	-	T	chr1:55009002	Sf3b1	SINE	Intron	non_coding_transcript_variant	0	0	55008470	532	downstream	intronic	-2.00214	0.00382	0.0153	0.509	|	0.0589593	0.00443	0.00425	0.985	|	1	20	0.05	1	14	0.0714286	0	16	0	1	18	0.0555556	0	15	0	0	8	0	|	0	16	0	1	13	0.0769231
chr1	55424317	+	A	chr1:55424317	Plcl1	LINE	Intron	intron_variant	0	0	55425130	813	downstream	intronic	-1.70379	0.0329	0.107	0.574	|	0.322526	0.0215	0.0172	0.921	|	1	18	0.0555556	1	10	0.1	2	9	0.222222	0	11	0	1	7	0.142857	3	12	0.25	|	0	12	0	1	9	0.111111
chr1	55424335	+	A	chr1:55424335	Plcl1	LINE	Intron	intron_variant	0	0	55425111	776	downstream	intronic	-0.321158	0.0228	0.0285	0.929	|	1.74032	0.0775	0.0232	0.543	|	0	17	0	3	10	0.3	1	13	0.0769231	1	13	0.0769231	0	7	0	2	13	0.153846	|	3	12	0.25	0	11	0
chr1	55572728	+	A	chr1:55572728	Plcl1	LTR	Intron	intron_variant	0	0	-	-	-	-	-2.0517	0.00505	0.021	0.559	|	0	0.00425	0.00425	1	|	4	29	0.137931	1	15	0.0666667	0	19	0	4	31	0.129032	0	26	0	0	26	0	|	0	9	0	1	13	0.0769231
chr1	55572741	+	A	chr1:55572741	Plcl1	LTR	Intron	intron_variant	0	0	-	-	-	-	-1.68961	0.0323	0.104	0.573	|	5.64792	0.213	0.00425	0.101	|	3	30	0.1	3	14	0.214286	1	19	0.0526316	5	31	0.16129	5	24	0.208333	0	28	0	|	0	9	0	1	13	0.0769231
chr1	55572742	+	A	chr1:55572742	Plcl1	LTR	Intron	intron_variant	0	0	-	-	-	-	-0.309215	0.456	0.565	0.526	|	0.50946	0.475	0.333	0.155	|	20	30	0.666667	9	14	0.642857	8	19	0.421053	15	32	0.46875	17	24	0.708333	8	28	0.285714	|	4	9	0.444444	4	12	0.333333
chr1	55572751	+	A	chr1:55572751	Plcl1	LTR	Intron	intron_variant	0	0	55573292	541	downstream	intronic	4.90665	0.1	0.00333	0.103	|	-2.26529	0.005	0.024	0.527	|	1	27	0.037037	0	13	0	0	17	0	4	29	0.137931	2	23	0.0869565	2	24	0.0833333	|	0	9	0	2	12	0.166667
chr1	55572789	+	A	chr1:55572789	Plcl1	LTR	Intron	intron_variant	0	0	-	-	-	-	2.69492	0.229	0.0354	0.409	|	1.59331	0.111	0.0368	0.605	|	4	12	0.333333	0	5	0	2	15	0.133333	4	18	0.222222	3	17	0.176471	4	13	0.307692	|	1	6	0.166667	3	10	0.3
chr1	55572797	+	A	chr1:55572797	Plcl1	LTR	Intron	intron_variant	0	0	-	-	-	-	4.41569	0.0886	0.00415	0.162	|	0.245655	0.0055	0.00464	0.944	|	0	10	0	0	5	0	1	14	0.0714286	1	15	0.0666667	2	16	0.125	1	12	0.0833333	|	0	6	0	1	10	0.1
chr1	55573309	+	A	chr1:55573309	Plcl1	LTR	Intron	intron_variant	0	0	-	-	-	-	4.59225	0.0241	0.001	0.184	|	-2.16012	0.00737	0.0329	0.605	|	0	14	0	0	9	0	0	20	0	2	19	0.105263	0	12	0	2	15	0.133333	|	2	7	0.285714	0	5	0
chr1	55573319	+	A	chr1:55573319	Plcl1	LTR	Intron	intron_variant	0	0	-	-	-	-	-2.58113	0.00585	0.035	0.515	|	-2.42464	0.0338	0.181	0.442	|	3	14	0.214286	0	9	0	4	20	0.2	0	18	0	0	12	0	3	15	0.2	|	2	7	0.285714	1	6	0.166667
chr1	58396557	+	A	chr1:58396557	Bzw1	SINE	Intron	NMD_transcript_variant	0	0	-	-	-	-	-2.52027	0.0199	0.114	0.365	|	2.01963	0.0306	0.00754	0.626	|	6	28	0.214286	1	11	0.0909091	1	13	0.0769231	1	14	0.0714286	0	14	0	2	18	0.111111	|	0	22	0	3	7	0.428571
chr1	58396573	+	A	chr1:58396573	Bzw1	SINE	Intron	NMD_transcript_variant	0	0	58396792	219	downstream	intronic	-4.6958	0.00457	0.118	0.163	|	4.31838	0.0761	0.00382	0.144	|	5	29	0.172414	2	16	0.125	1	13	0.0769231	0	17	0	0	16	0	2	21	0.0952381	|	0	24	0	0	6	0
chr1	58396772	+	A	chr1:58396772	Bzw1	SINE	Intron	NMD_transcript_variant	0	0	58396594	178	upstream	intronic	-0.0331786	0.0161	0.0165	0.991	|	-2.3023	0.001	0.00493	0.423	|	1	14	0.0714286	1	16	0.0625	0	27	0	1	12	0.0833333	0	16	0	1	20	0.05	|	3	25	0.12	0	14	0
chr1	58413932	-	T	chr1:58413932	Clk1	SINE	Intron	non_coding_transcript_variant	0	0	58414202	270	upstream	intronic	-2.24402	0.0137	0.0648	0.366	|	-0.574964	0.0128	0.0191	0.849	|	1	22	0.0454545	5	27	0.185185	1	31	0.0322581	0	24	0	1	29	0.0344828	2	27	0.0740741	|	2	30	0.0666667	0	20	0
chr1	58462161	+	A	chr1:58462161	Gm23966,Nif3l1,Orc2	SINE	UTR	3_prime_UTR_variant	0	0	-	-	-	-	-1.45942	0.0121	0.0334	0.509	|	-0.438217	0.0383	0.052	0.421	|	1	22	0.0454545	1	34	0.0294118	1	36	0.0277778	0	39	0	1	35	0.0285714	2	32	0.0625	|	3	37	0.0810811	1	17	0.0588235
chr1	58532294	-	T	chr1:58532294	Fam126b	SINE	Intron	NMD_transcript_variant	0	0	58532689	395	upstream	intronic	-4.09711	0.001	0.0171	0.185	|	-4.23425	0.001	0.0188	0.184	|	2	21	0.0952381	0	10	0	1	19	0.0526316	0	13	0	0	12	0	0	10	0	|	0	8	0	1	10	0.1
chr1	58532308	-	T	chr1:58532308	Fam126b	SINE	Intron	NMD_transcript_variant	0	0	-	-	-	-	-2.62654	0.0497	0.307	0.45	|	-0.760319	0.183	0.311	0.358	|	5	20	0.25	3	9	0.333333	8	23	0.347826	4	13	0.307692	0	12	0	4	10	0.4	|	2	8	0.25	3	10	0.3
chr1	59686907	+	A	chr1:59686907	Nop58	SINE	Intron	non_coding_transcript_variant	0	0	59688336	1429	downstream	intronic	0.231715	0.00457	0.00389	0.941	|	0	0.001	0.001	---	|	0	19	0	0	9	0	1	17	0.0588235	0	14	0	0	21	0	2	21	0.0952381	|	0	6	0	0	8	0
chr1	59688866	+	A	chr1:59688866	Gm26293,Nop58,Snord70	SINE	Intron	non_coding_transcript_variant	0	0	59686940	1926	upstream	Intron	0.610676	0.0265	0.0173	0.857	|	-0.157584	0.0372	0.0415	0.969	|	1	25	0.04	3	23	0.130435	0	18	0	0	21	0	2	19	0.105263	3	17	0.176471	|	9	28	0.321429	0	21	0
chr1	59688871	+	A	chr1:59688871	Gm26293,Nop58,Snord70	SINE	Intron	non_coding_transcript_variant	0	0	-	-	-	-	-1.90595	0.001	0.00375	0.423	|	-1.7026	0.001	0.00325	0.423	|	0	25	0	0	23	0	1	19	0.0526316	0	21	0	0	20	0	0	17	0	|	1	29	0.0344828	0	21	0
chr1	59688879	+	A	chr1:59688879	Gm26293,Nop58,Snord70	SINE	Intron	non_coding_transcript_variant	0	0	-	-	-	-	2.29726	0.0184	0.00375	0.465	|	-0.393524	0.0245	0.0322	0.914	|	0	24	0	0	22	0	1	19	0.0526316	0	22	0	2	20	0.1	1	16	0.0625	|	8	30	0.266667	0	19	0
chr1	59712745	+	A	chr1:59712745	Nop58	SINE	UTR	3_prime_UTR_variant	0	0	-	-	-	-	-4.00823	0.001	0.0161	0.188	|	1.27186	0.124	0.0513	0.111	|	2	20	0.1	0	11	0	1	24	0.0416667	0	23	0	0	19	0	0	15	0	|	1	21	0.047619	2	22	0.0909091
chr1	59712975	+	A	chr1:59712975	Nop58	SINE	UTR	3_prime_UTR_variant	0	0	59712797	178	upstream	UTR	-0.534526	0.0664	0.0962	0.297	|	-4.14222	0.00515	0.0909	0.219	|	3	35	0.0857143	4	33	0.121212	3	35	0.0857143	2	35	0.0571429	3	65	0.0461538	6	54	0.111111	|	3	37	0.0810811	1	18	0.0555556
chr1	59716768	+	A	chr1:59716768	Nop58	SINE	UTR	3_prime_UTR_variant	0	0	59718824	2056	downstream	UTR	1.75051	0.0225	0.00669	0.65	|	1.42033	0.0856	0.032	0.63	|	0	12	0	3	10	0.3	0	27	0	4	25	0.16	0	16	0	1	14	0.0714286	|	8	34	0.235294	0	7	0
chr1	59717041	+	A	chr1:59717041	Nop58	SINE	UTR	3_prime_UTR_variant	0	0	59718730	1689	downstream	UTR	0.156495	0.00425	0.00382	0.959	|	0.333333	0.005	0.00397	0.919	|	1	18	0.0555556	0	11	0	0	15	0	2	26	0.0769231	0	16	0	0	12	0	|	0	12	0	0	11	0
chr1	59717462	+	A	chr1:59717462	Nop58	SINE	UTR	3_prime_UTR_variant	1	1	59717043	419	upstream	UTR	-1.60297	0.0101	0.0306	0.441	|	-1.51638	0.00415	0.0119	0.611	|	1	33	0.030303	2	40	0.05	1	53	0.0188679	1	37	0.027027	0	40	0	2	53	0.0377358	|	3	46	0.0652174	1	39	0.025641
chr1	59717839	+	A	chr1:59717839	Nop58	LTR	UTR	3_prime_UTR_variant	0	0	59718782	943	downstream	UTR	0	0.001	0.001	---	|	2.16878	0.0045	0.001	0.423	|	0	17	0	0	18	0	0	32	0	0	20	0	0	18	0	0	18	0	|	0	13	0	0	13	0
chr1	59772708	+	A	chr1:59772708	Bmpr2	SINE	Intron	intron_variant	0	0	59773437	729	downstream	intronic	0.226024	0.00585	0.005	0.951	|	-2.38614	0.001	0.00523	0.423	|	0	5	0	1	8	0.125	0	5	0	0	6	0	1	5	0.2	0	11	0	|	0	7	0	0	6	0
chr1	59772712	+	A	chr1:59772712	Bmpr2	SINE	Intron	intron_variant	0	0	59773432	720	downstream	intronic	2.46027	0.0055	0.001	0.423	|	-0.120857	0.00481	0.00523	0.972	|	0	5	0	0	9	0	0	5	0	0	6	0	1	6	0.166667	0	12	0	|	0	7	0	0	6	0
chr1	59874208	+	A	chr1:59874208	Bmpr2	SINE	UTR	regulatory_region_variant	0	0	-	-	-	-	0.14999	0.0792	0.0714	0.678	|	0.128533	0.091	0.0833	0.769	|	16	202	0.0792079	17	177	0.0960452	10	209	0.0478469	15	171	0.0877193	15	223	0.0672646	15	178	0.0842697	|	18	137	0.131387	7	99	0.0707071
chr1	59878722	+	A	chr1:59878722	Bmpr2	SINE	UTR	3_prime_UTR_variant	0	0	-	-	-	-	-2.59999	0.00425	0.0258	0.455	|	0.413334	0.0301	0.0226	0.908	|	2	14	0.142857	0	5	0	3	25	0.12	0	20	0	0	14	0	1	13	0.0769231	|	3	18	0.166667	0	10	0
chr1	60151786	+	A	chr1:60151786	Carf	SINE	UTR	3_prime_UTR_variant	1	1	-	-	-	-	0.679202	0.01	0.00626	0.778	|	-2.47162	0.00711	0.0394	0.223	|	1	77	0.012987	1	53	0.0188679	0	62	0	4	56	0.0714286	1	71	0.0140845	0	61	0	|	2	46	0.0434783	1	28	0.0357143
chr1	60336840	+	A	chr1:60336840	Nbeal1	SINE	UTR	3_prime_UTR_variant	1	1	-	-	-	-	-1.47253	0.013	0.036	0.518	|	-1.50165	0.00277	0.00785	0.518	|	2	71	0.028169	2	44	0.0454545	2	55	0.0363636	2	27	0.0740741	0	35	0	1	34	0.0294118	|	1	69	0.0144928	2	60	0.0333333
chr1	60445823	+	A	chr1:60445823	Abi2	SINE	Intron	intron_variant	1	1	60446146	323	downstream	intronic	-3.37905	0.001	0.0104	0.185	|	2.19479	0.0172	0.00375	0.478	|	1	37	0.027027	0	24	0	2	48	0.0416667	0	30	0	0	40	0	0	17	0	|	1	19	0.0526316	0	18	0
chr1	60445828	+	A	chr1:60445828	Abi2	SINE	Intron	intron_variant	0	0	60446140	312	downstream	intronic	-1.77749	0.00357	0.0122	0.529	|	2.21965	0.0161	0.00347	0.457	|	2	39	0.0512821	0	29	0	2	56	0.0357143	0	37	0	0	44	0	1	22	0.0454545	|	1	24	0.0416667	0	18	0
chr1	60446133	+	A	chr1:60446133	Abi2	SINE	Intron	intron_variant	0	0	60445834	299	upstream	intronic	2.2641	0.0155	0.00322	0.434	|	1.56013	0.0137	0.00464	0.622	|	0	26	0	1	30	0.0333333	0	36	0	3	58	0.0517241	0	37	0	2	28	0.0714286	|	0	24	0	2	20	0.1
chr1	60471577	+	A	chr1:60471577	Abi2	SINE	Intron	intron_variant	0	0	-	-	-	-	-0.495142	0.00288	0.00405	0.855	|	0.457323	0.00389	0.00283	0.863	|	0	35	0	2	30	0.0666667	0	38	0	0	24	0	1	42	0.0238095	0	32	0	|	0	13	0	0	11	0
chr1	60517785	-	T	chr1:60517785	Raph1	SINE	Intron	non_coding_transcript_exon_variant	0	0	-	-	-	-	3.3889	0.0105	0.001	0.184	|	-0.333333	0.00338	0.00425	0.909	|	0	15	0	0	15	0	0	32	0	1	29	0.0344828	1	30	0.0333333	0	14	0	|	0	7	0	0	13	0
chr1	60517797	-	T	chr1:60517797	Raph1	SINE	Intron	non_coding_transcript_exon_variant	0	0	60518804	1007	upstream	intronic	-2.16012	0.00431	0.0193	0.512	|	-2.21462	0.001	0.00464	0.423	|	1	14	0.0714286	0	13	0	3	30	0.1	2	25	0.08	0	31	0	0	13	0	|	0	5	0	1	10	0.1
chr1	60558905	-	T	chr1:60558905	Raph1	SINE	Intron	intron_variant	0	0	-	-	-	-	-0.597138	0.00405	0.00613	0.866	|	0	0.001	0.001	---	|	0	19	0	3	13	0.230769	0	25	0	0	13	0	1	15	0.0666667	0	10	0	|	0	9	0	0	6	0
chr1	63048306	-	T	chr1:63048306	Ino80d	.	UTR	3_prime_UTR_variant	0	0	-	-	-	-	1.15274	0.0163	0.00731	0.513	|	-1.18546	0.00811	0.0185	0.52	|	1	71	0.0140845	0	49	0	2	72	0.0277778	1	68	0.0147059	1	57	0.0175439	1	60	0.0166667	|	1	52	0.0192308	1	36	0.0277778
chr1	63048307	-	T	chr1:63048307	Ino80d	.	UTR	3_prime_UTR_variant	0	0	-	-	-	-	1.04712	0.00626	0.00303	0.641	|	-2.61096	0.001	0.00611	0.187	|	0	72	0	0	50	0	2	72	0.0277778	1	68	0.0147059	0	57	0	1	60	0.0166667	|	1	51	0.0196078	0	36	0
chr1	63049607	-	T	chr1:63049607	Ino80d	.	UTR	3_prime_UTR_variant	0	0	-	-	-	-	0.612167	0.00415	0.00271	0.82	|	1.65526	0.00315	0.001	0.423	|	0	32	0	0	33	0	1	50	0.02	2	28	0.0714286	0	22	0	0	34	0	|	0	30	0	0	22	0
chr1	63117047	+	A	chr1:63117047	Gm20342,Ino80d,Ino80dos	SINE	Intron	non_coding_transcript_variant	1	1	63117631	584	downstream	exonic	-3.02709	0.00425	0.0347	0.414	|	2.61962	0.144	0.0234	0.381	|	0	15	0	4	16	0.25	3	18	0.166667	0	10	0	1	13	0.0769231	0	15	0	|	3	13	0.230769	0	15	0
chr1	63117052	+	A	chr1:63117052	Gm20342,Ino80d,Ino80dos	SINE	Intron	non_coding_transcript_variant	1	1	63117626	574	downstream	exonic	2.50298	0.106	0.0187	0.362	|	-1.59572	0.0352	0.106	0.605	|	0	14	0	2	17	0.117647	1	18	0.0555556	2	10	0.2	1	12	0.0833333	1	14	0.0714286	|	4	14	0.285714	1	14	0.0714286
chr1	63117112	+	A	chr1:63117112	Gm20342,Ino80d,Ino80dos	SINE	Intron	non_coding_transcript_variant	0	0	-	-	-	-	0	0.001	0.001	---	|	0.180189	0.0045	0.00397	0.954	|	0	18	0	0	17	0	0	15	0	0	10	0	0	13	0	0	8	0	|	1	16	0.0625	0	12	0
chr1	64541401	+	A	chr1:64541401	Creb1	SINE	Intron	non_coding_transcript_variant	0	0	64539902	1499	upstream	intronic	1.74381	0.088	0.0263	0.553	|	-2.08845	0.001	0.00425	0.423	|	1	12	0.0833333	0	11	0	5	23	0.217391	1	29	0.0344828	1	16	0.0625	6	19	0.315789	|	1	13	0.0769231	0	17	0
chr1	64541412	+	A	chr1:64541412	Creb1	SINE	Intron	non_coding_transcript_variant	0	0	-	-	-	-	1.83062	0.0188	0.00529	0.608	|	0	0.001	0.001	---	|	0	11	0	0	17	0	4	27	0.148148	1	30	0.0333333	0	15	0	4	20	0.2	|	0	12	0	0	13	0
chr1	64541417	+	A	chr1:64541417	Creb1	SINE	Intron	non_coding_transcript_variant	0	0	-	-	-	-	0.567573	0.173	0.117	0.441	|	-4.3181	0.001	0.0199	0.191	|	1	11	0.0909091	2	17	0.117647	4	27	0.148148	7	29	0.241379	1	13	0.0769231	5	18	0.277778	|	2	12	0.166667	0	13	0
chr1	64541443	+	A	chr1:64541443	Creb1	SINE	Intron	non_coding_transcript_variant	0	0	64539862	1581	upstream	intronic	-2.03593	0.001	0.0041	0.423	|	-0.366512	0.00405	0.00523	0.912	|	0	9	0	0	19	0	2	29	0.0689655	0	29	0	0	13	0	0	13	0	|	0	12	0	2	14	0.142857
chr1	65166607	-	T	chr1:65166607	Idh1	SINE	Intron	intron_variant	0	0	65167129	522	upstream	intronic	7.35588	0.164	0.001	0.00585	|	2.16649	0.0168	0.00375	0.481	|	0	11	0	0	5	0	0	6	0	1	13	0.0769231	2	7	0.285714	1	5	0.2	|	0	12	0	0	13	0
chr1	66672714	+	A	chr1:66672714	Unc80	.	Exon	missense_variant	1	1	66671982	732	upstream	intronic	0.319786	0.00652	0.00523	0.934	|	2.70593	0.0303	0.00464	0.46	|	0	11	0	0	5	0	3	21	0.142857	5	18	0.277778	0	8	0	0	6	0	|	0	7	0	0	6	0
chr1	66733254	-	T	chr1:66733254	Kansl1l	SINE	Intron	intron_variant	0	0	-	-	-	-	-1.7378	0.028	0.0935	0.551	|	0.195601	0.226	0.197	0.737	|	2	23	0.0869565	2	25	0.08	2	17	0.117647	3	34	0.0882353	8	32	0.25	0	20	0	|	9	28	0.321429	3	24	0.125
chr1	66733258	+	A	chr1:66733258	Kansl1l	SINE	Intron	intron_variant	0	0	66733676	418	downstream	intronic	0.110402	0.0142	0.0131	0.97	|	-2.10731	0.001	0.00431	0.423	|	0	23	0	1	26	0.0384615	1	17	0.0588235	1	34	0.0294118	3	31	0.0967742	0	19	0	|	2	25	0.08	0	24	0
chr1	66733264	+	A	chr1:66733264	Kansl1l	SINE	Intron	intron_variant	0	0	66733671	407	downstream	intronic	2.09637	0.0158	0.00368	0.487	|	0.0654657	0.0203	0.0194	0.984	|	1	20	0.05	0	26	0	0	16	0	2	31	0.0645161	2	33	0.0606061	0	16	0	|	2	25	0.08	0	25	0
chr1	66733658	-	T	chr1:66733658	Kansl1l	SINE	Intron	intron_variant	0	0	66733275	383	downstream	intronic	0.0657384	0.158	0.151	0.908	|	-0.548458	0.119	0.174	0.368	|	4	30	0.133333	8	28	0.285714	3	33	0.0909091	7	41	0.170732	8	43	0.186047	3	24	0.125	|	5	44	0.113636	6	21	0.285714
chr1	66733679	-	T	chr1:66733679	Kansl1l	SINE	Intron	intron_variant	0	0	-	-	-	-	-0.100573	0.173	0.186	0.809	|	0.910101	0.193	0.103	0.503	|	7	32	0.21875	7	28	0.25	4	34	0.117647	6	33	0.181818	8	38	0.210526	3	22	0.136364	|	7	36	0.194444	4	20	0.2
chr1	66738616	+	A	chr1:66738616	Kansl1l	SINE	Intron	intron_variant	0	0	-	-	-	-	1.75931	0.0155	0.00459	0.584	|	0.0741308	0.00405	0.00385	0.98	|	0	28	0	0	22	0	3	31	0.0967742	0	24	0	2	34	0.0588235	3	47	0.0638298	|	0	25	0	0	19	0
chr1	66738621	+	A	chr1:66738621	Kansl1l	SINE	Intron	intron_variant	0	0	-	-	-	-	-0.570702	0.0831	0.123	0.397	|	0.0139401	0.00389	0.00385	0.996	|	4	25	0.16	2	22	0.0909091	4	31	0.129032	1	23	0.0434783	5	33	0.151515	4	46	0.0869565	|	0	25	0	0	21	0
chr1	66738667	+	A	chr1:66738667	Kansl1l	SINE	Intron	intron_variant	0	0	66738874	207	downstream	intronic	-4.17492	0.00393	0.0709	0.168	|	2.63563	0.0931	0.015	0.311	|	1	16	0.0625	1	14	0.0714286	2	25	0.08	0	17	0	0	24	0	2	33	0.0606061	|	0	25	0	1	22	0.0454545
chr1	66738943	+	A	chr1:66738943	Kansl1l	SINE	Intron	intron_variant	0	0	66738594	349	upstream	intronic	2.82328	0.0679	0.0096	0.223	|	4.85933	0.0924	0.00318	0.0942	|	1	39	0.025641	1	29	0.0344828	0	19	0	1	22	0.0454545	1	15	0.0666667	3	29	0.103448	|	0	27	0	0	15	0
chr1	66738986	+	A	chr1:66738986	Kansl1l	SINE	Intron	intron_variant	0	0	66738549	437	upstream	intronic	-1.29262	0.0164	0.0403	0.588	|	3.14088	0.027	0.00306	0.344	|	2	39	0.0512821	1	28	0.0357143	1	28	0.0357143	2	29	0.0689655	0	22	0	2	31	0.0645161	|	0	20	0	0	12	0
chr1	68522867	-	T	chr1:68522867	Erbb4	LINE	Intron	intron_variant	0	0	-	-	-	-	0.63563	0.0063	0.00405	0.859	|	2.01963	0.00405	0.001	0.423	|	0	18	0	0	14	0	1	15	0.0666667	0	27	0	3	12	0.25	0	12	0	|	0	6	0	0	13	0
chr1	68523110	-	T	chr1:68523110	Erbb4	LINE	Intron	intron_variant	0	0	-	-	-	-	0	0.001	0.001	---	|	2.23929	0.00472	0.001	0.423	|	0	5	0	0	15	0	0	15	0	0	11	0	0	13	0	0	13	0	|	0	9	0	0	10	0
chr1	68525225	-	T	chr1:68525225	Erbb4	LINE	Intron	intron_variant	0	0	68522890	2335	downstream	intronic	-2.05594	0.0045	0.0187	0.536	|	-0.993482	0.018	0.0359	0.782	|	1	9	0.111111	0	12	0	1	17	0.0588235	0	16	0	0	13	0	1	11	0.0909091	|	3	10	0.3	2	13	0.153846
chr1	68525268	-	T	chr1:68525268	Erbb4	LINE	Intron	intron_variant	0	0	-	-	-	-	-4.21539	0.00598	0.111	0.242	|	-0.921845	0.116	0.22	0.374	|	2	13	0.153846	2	14	0.142857	1	16	0.0625	0	12	0	0	13	0	3	14	0.214286	|	1	7	0.142857	3	12	0.25
chr1	68538349	-	T	chr1:68538349	Erbb4	LINE	Intron	intron_variant	0	0	-	-	-	-	2.91978	0.0322	0.00425	0.423	|	-2.42908	0.022	0.118	0.416	|	0	11	0	1	13	0.0769231	0	15	0	2	12	0.166667	0	18	0	2	10	0.2	|	1	15	0.0666667	3	22	0.136364
chr1	68538773	-	T	chr1:68538773	Erbb4	LINE	Intron	intron_variant	0	0	68541126	2353	upstream	intronic	5.79438	0.0555	0.001	0.0118	|	-2.21462	0.001	0.00464	0.423	|	0	21	0	0	17	0	0	26	0	4	30	0.133333	1	26	0.0384615	1	30	0.0333333	|	0	14	0	0	14	0
chr1	68538783	-	T	chr1:68538783	Erbb4	LINE	Intron	intron_variant	0	0	68536444	2339	downstream	Intron	3.80632	0.0492	0.00352	0.168	|	2.08845	0.00425	0.001	0.423	|	1	23	0.0434783	0	18	0	0	25	0	2	28	0.0714286	1	24	0.0416667	1	25	0.04	|	0	11	0	0	15	0
chr1	68538798	-	T	chr1:68538798	Erbb4	LINE	Intron	intron_variant	0	0	68541108	2310	upstream	intronic	-2.01681	0.00389	0.0157	0.51	|	0.151893	0.00385	0.00347	0.957	|	2	27	0.0740741	1	19	0.0526316	0	27	0	2	34	0.0588235	0	25	0	0	26	0	|	0	15	0	0	16	0
chr1	68538802	-	T	chr1:68538802	Erbb4	LINE	Intron	intron_variant	0	0	68541100	2298	upstream	intronic	3.57516	0.0553	0.00464	0.246	|	2.08461	0.0147	0.00347	0.474	|	0	26	0	2	20	0.1	0	26	0	2	35	0.0571429	2	25	0.08	1	27	0.037037	|	0	15	0	0	17	0
chr1	68538830	-	T	chr1:68538830	Erbb4	LINE	Intron	intron_variant	0	0	68541074	2244	upstream	intronic	1.93776	0.0646	0.0169	0.452	|	1.08768	0.191	0.0901	0.23	|	3	25	0.12	0	20	0	1	25	0.04	2	30	0.0666667	1	19	0.0526316	2	26	0.0769231	|	2	16	0.125	3	19	0.157895
chr1	68538838	-	T	chr1:68538838	Erbb4	LINE	Intron	intron_variant	0	0	68541063	2225	upstream	intronic	1.48776	0.0547	0.0195	0.56	|	1.62611	0.00309	0.001	0.423	|	2	27	0.0740741	2	20	0.1	0	29	0	2	30	0.0666667	1	17	0.0588235	1	24	0.0416667	|	0	16	0	0	20	0
chr1	68538843	-	T	chr1:68538843	Erbb4	LINE	Intron	intron_variant	0	0	68541059	2216	upstream	intronic	1.53591	0.044	0.0152	0.522	|	3.58555	0.012	0.001	0.187	|	1	26	0.0384615	2	22	0.0909091	0	28	0	1	30	0.0333333	1	17	0.0588235	1	23	0.0434783	|	0	15	0	0	21	0
chr1	68541081	-	T	chr1:68541081	Erbb4	LINE	Intron	intron_variant	0	0	68538821	2260	downstream	intronic	-2.03593	0.001	0.0041	0.423	|	-2.38614	0.001	0.00523	0.423	|	0	15	0	0	13	0	2	29	0.0689655	0	11	0	0	17	0	0	19	0	|	3	21	0.142857	0	11	0
chr1	68541102	-	T	chr1:68541102	Erbb4	LINE	Intron	intron_variant	0	0	68538800	2302	downstream	intronic	0	0.001	0.001	---	|	-2.34239	0.001	0.00507	0.423	|	0	15	0	0	17	0	0	26	0	0	11	0	0	18	0	0	20	0	|	3	23	0.130435	0	10	0
chr1	68541113	-	T	chr1:68541113	Erbb4	LINE	Intron	intron_variant	0	0	68538789	2324	downstream	intronic	-1.79361	0.001	0.00347	0.423	|	1.66986	0.0161	0.00507	0.618	|	0	14	0	0	13	0	1	24	0.0416667	0	11	0	0	16	0	0	20	0	|	3	23	0.130435	0	9	0
chr1	68549082	-	T	chr1:68549082	Erbb4	LINE	Intron	intron_variant	0	0	-	-	-	-	-2.32193	0.001	0.005	0.423	|	-0.182496	0.00375	0.00425	0.952	|	0	9	0	1	8	0.125	0	9	0	0	20	0	0	17	0	0	8	0	|	1	13	0.0769231	0	12	0
chr1	68734991	-	T	chr1:68734991	Erbb4	LINE	Intron	intron_variant	0	0	68736032	1041	upstream	intronic	0.28082	0.0041	0.00338	0.922	|	-0.217359	0.0045	0.00523	0.95	|	0	29	0	0	12	0	1	26	0.0384615	0	27	0	0	26	0	2	29	0.0689655	|	1	7	0.142857	0	7	0
chr1	68735014	-	T	chr1:68735014	Erbb4	LINE	Intron	intron_variant	0	0	68736009	995	upstream	intronic	0.0343645	0.00333	0.00325	0.989	|	4.33757	0.0202	0.001	0.184	|	0	33	0	0	12	0	1	29	0.0344828	0	27	0	0	28	0	1	27	0.037037	|	0	9	0	0	8	0
chr1	68735123	-	T	chr1:68735123	Erbb4	LINE	Intron	intron_variant	0	0	-	-	-	-	0.0114052	0.543	0.539	0.936	|	0.749031	0.613	0.365	0.12	|	13	26	0.5	5	8	0.625	9	18	0.5	12	20	0.6	8	15	0.533333	11	22	0.5	|	5	10	0.5	3	8	0.375
chr1	68735128	-	T	chr1:68735128	Erbb4	LINE	Intron	intron_variant	0	0	-	-	-	-	-0.100449	0.717	0.768	0.503	|	0.96299	0.859	0.441	0.138	|	21	26	0.807692	6	9	0.666667	16	19	0.842105	17	21	0.809524	10	15	0.666667	15	22	0.681818	|	6	10	0.6	4	7	0.571429
chr1	68735129	-	T	chr1:68735129	Erbb4	LINE	Intron	intron_variant	0	0	-	-	-	-	0.453218	0.331	0.242	0.539	|	1.08631	0.388	0.183	0.254	|	7	26	0.269231	1	9	0.111111	9	19	0.473684	7	21	0.333333	4	15	0.266667	9	22	0.409091	|	2	10	0.2	2	7	0.285714
chr1	68735132	-	T	chr1:68735132	Erbb4	LINE	Intron	intron_variant	0	0	-	-	-	-	-0.00414425	0.437	0.438	0.988	|	1.1941	0.588	0.257	0.222	|	12	25	0.48	5	9	0.555556	6	19	0.315789	10	21	0.47619	6	14	0.428571	9	22	0.409091	|	5	9	0.555556	2	7	0.285714
chr1	68735139	-	T	chr1:68735139	Erbb4	LINE	Intron	intron_variant	0	0	68735936	797	upstream	intronic	-0.0119737	0.445	0.448	0.952	|	1.26912	0.62	0.257	0.204	|	11	25	0.44	5	9	0.555556	7	19	0.368421	9	21	0.428571	6	14	0.428571	11	23	0.478261	|	5	9	0.555556	2	7	0.285714
chr1	68735184	-	T	chr1:68735184	Erbb4	LINE	Intron	intron_variant	0	0	68735894	710	upstream	intronic	5.04832	0.122	0.00368	0.106	|	-2.02935	0.0263	0.107	0.491	|	1	20	0.05	0	10	0	0	26	0	2	24	0.0833333	4	16	0.25	2	23	0.0869565	|	4	14	0.285714	1	7	0.142857
chr1	68735194	-	T	chr1:68735194	Erbb4	LINE	Intron	intron_variant	0	0	-	-	-	-	0.180236	0.589	0.52	0.713	|	-0.683403	0.352	0.565	0.206	|	10	19	0.526316	10	12	0.833333	8	25	0.32	14	24	0.583333	7	15	0.466667	18	24	0.75	|	5	14	0.357143	4	7	0.571429
chr1	68735196	-	T	chr1:68735196	Erbb4	LINE	Intron	intron_variant	0	0	-	-	-	-	0.843907	0.393	0.219	0.101	|	-0.173666	0.255	0.288	0.77	|	3	19	0.157895	4	12	0.333333	5	25	0.2	12	24	0.5	6	15	0.4	7	23	0.304348	|	5	14	0.357143	1	7	0.142857
chr1	68735199	-	T	chr1:68735199	Erbb4	LINE	Intron	intron_variant	0	0	-	-	-	-	3.93681	0.0911	0.00595	0.265	|	2.4481	0.116	0.0213	0.391	|	4	19	0.210526	0	13	0	0	26	0	3	23	0.130435	1	15	0.0666667	2	23	0.0869565	|	2	13	0.153846	0	7	0
chr1	68735211	-	T	chr1:68735211	Erbb4	LINE	Intron	intron_variant	0	0	-	-	-	-	-1.42178	0.00472	0.0127	0.65	|	4.78555	0.0276	0.001	0.184	|	1	19	0.0526316	0	13	0	1	26	0.0384615	0	20	0	0	14	0	2	19	0.105263	|	0	11	0	0	6	0
chr1	68813420	-	T	chr1:68813420	Erbb4	LINE	Intron	intron_variant	0	0	68815650	2230	upstream	intronic	-3.19076	0.0309	0.283	0.327	|	-3.69973	0.0325	0.422	0.283	|	5	19	0.263158	4	10	0.4	3	14	0.214286	0	9	0	2	9	0.222222	2	15	0.133333	|	3	8	0.375	3	5	0.6
chr1	68813448	-	T	chr1:68813448	Erbb4	LINE	Intron	intron_variant	0	0	-	-	-	-	-1.43681	0.0794	0.215	0.0309	|	0.0491857	0.202	0.195	0.945	|	4	21	0.190476	2	12	0.166667	5	16	0.3125	1	10	0.1	2	20	0.1	1	20	0.05	|	5	12	0.416667	1	8	0.125
chr1	68813449	-	T	chr1:68813449	Erbb4	LINE	Intron	intron_variant	0	0	-	-	-	-	0.0520397	0.214	0.206	0.885	|	0.14483	0.417	0.377	0.713	|	5	22	0.227273	3	12	0.25	2	13	0.153846	3	11	0.272727	3	20	0.15	5	21	0.238095	|	6	12	0.5	3	8	0.375
chr1	68813568	-	T	chr1:68813568	Erbb4	LINE	Intron	intron_variant	0	0	68815551	1983	upstream	intronic	-1.94711	0.00476	0.0184	0.566	|	-3.77475	0.001	0.0137	0.186	|	1	22	0.0454545	0	11	0	3	22	0.136364	4	37	0.108108	0	25	0	0	28	0	|	1	15	0.0666667	0	7	0
chr1	68813569	-	T	chr1:68813569	Erbb4	LINE	Intron	intron_variant	0	0	68815550	1981	upstream	intronic	-2.61809	0.00329	0.0202	0.4	|	0.185464	0.00389	0.00342	0.947	|	2	22	0.0909091	1	11	0.0909091	0	20	0	0	37	0	0	24	0	1	28	0.0357143	|	0	14	0	0	7	0
chr1	68815597	-	T	chr1:68815597	Erbb4	LINE	Intron	intron_variant	0	0	68813474	2123	downstream	intronic	0.333333	0.00567	0.0045	0.925	|	0	0.001	0.001	---	|	0	5	0	0	10	0	1	11	0.0909091	0	13	0	0	5	0	2	11	0.181818	|	0	5	0	0	6	0
chr1	68815647	-	T	chr1:68815647	Erbb4	LINE	Intron	intron_variant	0	0	68813423	2224	downstream	intronic	0.504858	0.961	0.678	0.0458	|	-0.36163	0.585	0.751	0.479	|	4	5	0.8	4	6	0.666667	7	12	0.583333	9	9	1	8	9	0.888889	5	5	1	|	6	6	1	6	9	0.666667
chr1	68852600	-	T	chr1:68852600	Erbb4	LINE	Intron	intron_variant	0	0	68854583	1983	upstream	intronic	2.12694	0.00437	0.001	0.423	|	-4.43407	0.001	0.0216	0.184	|	0	13	0	0	6	0	0	18	0	0	16	0	1	12	0.0833333	0	16	0	|	2	18	0.111111	1	11	0.0909091
chr1	68852729	-	T	chr1:68852729	Erbb4	LINE	Intron	intron_variant	0	0	-	-	-	-	0	0.001	0.001	---	|	-0.064215	0.00397	0.00415	0.983	|	0	13	0	0	6	0	0	17	0	0	21	0	0	12	0	0	11	0	|	0	15	0	0	8	0
chr1	68866352	-	T	chr1:68866352	Erbb4	LINE	Intron	intron_variant	0	0	-	-	-	-	-4.38122	0.001	0.0208	0.184	|	1.91878	0.00378	0.001	0.423	|	2	26	0.0769231	2	17	0.117647	0	27	0	0	31	0	0	32	0	0	30	0	|	0	15	0	0	19	0
chr1	68866368	-	T	chr1:68866368	Erbb4	LINE	Intron	intron_variant	0	0	-	-	-	-	-6.2967	0.001	0.0786	0.00815	|	-3.76257	0.001	0.0136	0.184	|	2	26	0.0769231	3	19	0.157895	1	25	0.04	0	37	0	0	32	0	0	30	0	|	1	20	0.05	1	20	0.05
chr1	68866427	-	T	chr1:68866427	Erbb4	LINE	Intron	intron_variant	0	0	-	-	-	-	-2.03373	0.0122	0.0498	0.381	|	-2.81707	0.00329	0.0232	0.402	|	2	19	0.105263	1	23	0.0434783	1	37	0.027027	2	37	0.0540541	0	28	0	1	30	0.0333333	|	1	25	0.04	5	16	0.3125
chr1	68866441	-	T	chr1:68866441	Erbb4	LINE	Intron	intron_variant	0	0	-	-	-	-	-4.69005	0.00303	0.0782	0.0803	|	-2.10731	0.00322	0.0139	0.455	|	3	21	0.142857	3	23	0.130435	1	39	0.025641	1	36	0.0277778	0	28	0	0	31	0	|	0	21	0	1	15	0.0666667
chr1	68866447	-	T	chr1:68866447	Erbb4	LINE	Intron	intron_variant	0	0	-	-	-	-	1.4271	0.00975	0.00362	0.596	|	-2.48256	0.00279	0.0156	0.387	|	1	21	0.047619	0	22	0	0	45	0	1	36	0.0277778	0	31	0	1	30	0.0333333	|	0	22	0	2	17	0.117647
chr1	68878124	-	T	chr1:68878124	Erbb4	LINE	Intron	intron_variant	0	0	-	-	-	-	-1.14863	0.045	0.0998	0.0784	|	-0.276692	0.00437	0.00529	0.936	|	4	37	0.108108	3	29	0.103448	4	45	0.0888889	2	27	0.0740741	1	28	0.0357143	1	29	0.0344828	|	4	27	0.148148	0	13	0
chr1	68878154	-	T	chr1:68878154	Erbb4	LINE	Intron	intron_variant	0	0	-	-	-	-	2.14794	0.0165	0.00372	0.489	|	1.32462	0.0119	0.00475	0.67	|	0	39	0	0	24	0	2	39	0.0512821	0	22	0	3	24	0.125	1	28	0.0357143	|	3	28	0.107143	0	13	0
chr1	68897763	-	T	chr1:68897763	Erbb4	SINE	Intron	intron_variant	0	0	-	-	-	-	2.05051	0.176	0.0425	0.529	|	2.46382	0.302	0.0547	0.485	|	0	12	0	4	11	0.363636	4	19	0.210526	3	21	0.142857	4	21	0.190476	3	15	0.2	|	2	7	0.285714	4	7	0.571429
chr1	68936006	-	T	chr1:68936006	Erbb4	LINE	Intron	intron_variant	0	0	-	-	-	-	-0.736484	0.0125	0.0207	0.811	|	1.97045	0.0132	0.00338	0.486	|	0	20	0	4	28	0.142857	2	32	0.0625	2	37	0.0540541	1	28	0.0357143	0	17	0	|	0	20	0	0	9	0
chr1	68936105	-	T	chr1:68936105	Erbb4	LINE	Intron	intron_variant	0	0	-	-	-	-	-3.41736	0.001	0.0107	0.188	|	0.0370104	0.00342	0.00333	0.989	|	0	30	0	2	40	0.05	1	41	0.0243902	0	45	0	0	48	0	0	24	0	|	0	16	0	0	10	0
chr1	68936389	-	T	chr1:68936389	Erbb4	LINE	Intron	intron_variant	1	1	-	-	-	-	0	0.001	0.001	---	|	1.98859	0.00397	0.001	0.423	|	0	11	0	0	11	0	0	12	0	0	11	0	0	12	0	0	22	0	|	0	13	0	0	20	0
chr1	68941841	-	T	chr1:68941841	Erbb4	SINE	Intron	intron_variant	0	0	-	-	-	-	-4.09711	0.001	0.0171	0.185	|	4.14657	0.0177	0.001	0.187	|	2	21	0.0952381	1	19	0.0526316	0	10	0	0	11	0	0	11	0	0	8	0	|	0	11	0	0	14	0
chr1	68950271	-	T	chr1:68950271	Erbb4	.	Intron	intron_variant	0	0	68950377	106	upstream	intronic	-2.57989	0.0119	0.0711	0.284	|	1.95944	0.00389	0.001	0.423	|	1	23	0.0434783	2	29	0.0689655	3	25	0.12	1	22	0.0454545	1	27	0.037037	0	29	0	|	0	8	0	0	6	0
chr1	68950292	-	T	chr1:68950292	Erbb4	.	Intron	intron_variant	0	0	68950356	64	upstream	intronic	0.123911	0.54	0.495	0.356	|	2.74777	0.364	0.0542	0.442	|	18	37	0.486486	11	24	0.458333	18	33	0.545455	15	30	0.5	19	31	0.612903	19	37	0.513514	|	0	7	0	2	6	0.333333
chr1	68950293	-	T	chr1:68950293	Erbb4	.	Intron	intron_variant	0	0	68950356	63	upstream	intronic	0.567582	0.355	0.24	0.535	|	2.6318	0.229	0.037	0.422	|	14	36	0.388889	2	24	0.0833333	14	33	0.424242	11	30	0.366667	10	31	0.322581	14	37	0.378378	|	0	7	0	1	6	0.166667
chr1	68950367	-	T	chr1:68950367	Erbb4	.	Intron	intron_variant	0	0	68950282	85	downstream	intronic	-4.25342	0.00295	0.0562	0.112	|	3.85399	0.0145	0.001	0.187	|	4	68	0.0588235	2	32	0.0625	3	62	0.0483871	1	39	0.025641	0	53	0	0	49	0	|	0	13	0	0	7	0
chr1	68950372	-	T	chr1:68950372	Erbb4	.	Intron	intron_variant	0	0	68950278	94	downstream	intronic	0.984186	0.0432	0.0218	0.707	|	1.53108	0.0517	0.0179	0.551	|	8	71	0.112676	0	34	0	6	65	0.0923077	2	40	0.05	1	54	0.0185185	4	46	0.0869565	|	0	13	0	1	7	0.142857
chr1	68950380	-	T	chr1:68950380	Erbb4	.	Intron	intron_variant	0	0	68950270	110	downstream	intronic	0.776157	0.0511	0.0299	0.11	|	-0.333333	0.00397	0.005	0.919	|	2	68	0.0294118	1	34	0.0294118	2	65	0.0307692	3	40	0.075	2	51	0.0392157	2	44	0.0454545	|	0	14	0	1	8	0.125
chr1	68950394	-	T	chr1:68950394	Erbb4	.	Intron	intron_variant	1	1	-	-	-	-	0.279236	0.276	0.227	0.362	|	0.0232628	0.177	0.174	0.977	|	15	72	0.208333	9	32	0.28125	13	65	0.2	12	38	0.315789	11	54	0.203704	14	43	0.325581	|	4	14	0.285714	2	9	0.222222
chr1	68958135	-	T	chr1:68958135	Erbb4	LINE	Intron	intron_variant	0	0	-	-	-	-	-1.2047	0.0167	0.0384	0.624	|	1.40131	0.00929	0.00352	0.595	|	1	28	0.0357143	1	18	0.0555556	1	35	0.0285714	3	24	0.125	0	24	0	1	27	0.037037	|	0	25	0	1	23	0.0434783
chr1	68967838	-	T	chr1:68967838	Erbb4	LINE	Intron	intron_variant	0	0	68965370	2468	downstream	intronic	2.66478	0.0652	0.0103	0.253	|	-7.372	0.001	0.166	0.000787	|	1	34	0.0294118	1	27	0.037037	0	45	0	2	30	0.0666667	2	40	0.05	3	36	0.0833333	|	2	16	0.125	2	10	0.2
chr1	68967839	-	T	chr1:68967839	Erbb4	LINE	Intron	intron_variant	0	0	68965370	2469	downstream	intronic	1.57954	0.0353	0.0118	0.485	|	6.20902	0.074	0.001	0.00187	|	0	34	0	2	27	0.0740741	1	45	0.0222222	1	30	0.0333333	1	41	0.0243902	2	37	0.0540541	|	0	16	0	0	11	0
chr1	68967850	-	T	chr1:68967850	Erbb4	LINE	Intron	intron_variant	0	0	-	-	-	-	0.650083	0.0977	0.0623	0.466	|	-3.15492	0.026	0.231	0.312	|	1	35	0.0285714	2	29	0.0689655	6	49	0.122449	3	30	0.1	8	44	0.181818	2	39	0.0512821	|	4	16	0.25	3	11	0.272727
chr1	68967865	-	T	chr1:68967865	Erbb4	LINE	Intron	intron_variant	0	0	-	-	-	-	3.01576	0.078	0.00965	0.207	|	-0.254089	0.0189	0.0226	0.939	|	1	42	0.0238095	0	34	0	2	53	0.0377358	2	34	0.0588235	4	45	0.0888889	4	44	0.0909091	|	3	20	0.15	1	13	0.0769231
chr1	68980159	-	T	chr1:68980159	Erbb4	LINE	Intron	intron_variant	0	0	-	-	-	-	-1.53738	0.00333	0.00968	0.557	|	2.20177	0.0553	0.012	0.348	|	0	26	0	1	24	0.0416667	1	46	0.0217391	1	27	0.037037	0	29	0	0	26	0	|	1	18	0.0555556	0	17	0
chr1	68980179	-	T	chr1:68980179	Erbb4	LINE	Intron	intron_variant	0	0	-	-	-	-	-1.4141	0.0153	0.0407	0.556	|	-4.26054	0.00393	0.0753	0.152	|	1	28	0.0357143	1	23	0.0434783	2	46	0.0434783	3	29	0.103448	1	29	0.0344828	0	30	0	|	3	19	0.157895	2	20	0.1
chr1	68980209	-	T	chr1:68980209	Erbb4	LINE	Intron	intron_variant	0	0	-	-	-	-	1.75871	0.0136	0.00401	0.558	|	-4.6923	0.00405	0.105	0.143	|	0	25	0	0	14	0	2	31	0.0645161	1	16	0.0625	0	19	0	1	25	0.04	|	2	16	0.125	1	14	0.0714286
chr1	68980346	-	T	chr1:68980346	Erbb4	LINE	Intron	intron_variant	0	0	-	-	-	-	-2.60725	0.0322	0.196	0.421	|	2.47501	0.355	0.0639	0.00209	|	4	17	0.235294	6	26	0.230769	5	36	0.138889	5	12	0.416667	0	16	0	2	25	0.08	|	1	22	0.0454545	1	12	0.0833333
chr1	68996416	-	T	chr1:68996416	Erbb4	LINE	Intron	intron_variant	0	0	-	-	-	-	-0.377082	0.0136	0.0176	0.899	|	-0.0188612	0.0122	0.0124	0.995	|	4	52	0.0769231	3	42	0.0714286	0	70	0	0	52	0	2	46	0.0434783	3	52	0.0576923	|	2	50	0.04	2	42	0.047619
chr1	68996436	-	T	chr1:68996436	Erbb4	LINE	Intron	intron_variant	0	0	-	-	-	-	0.077641	0.0153	0.0145	0.979	|	2.25463	0.0466	0.00977	0.307	|	2	55	0.0363636	3	36	0.0833333	0	72	0	2	54	0.037037	5	52	0.0961538	0	55	0	|	2	51	0.0392157	1	42	0.0238095
chr1	68996449	-	T	chr1:68996449	Erbb4	LINE	Intron	intron_variant	0	0	-	-	-	-	-0.00527447	0.033	0.0332	0.995	|	-0.168752	0.00676	0.0076	0.938	|	3	61	0.0491803	2	35	0.0571429	1	77	0.012987	1	56	0.0178571	2	53	0.0377358	3	56	0.0535714	|	1	53	0.0188679	1	43	0.0232558
chr1	68996450	-	T	chr1:68996450	Erbb4	LINE	Intron	intron_variant	0	0	-	-	-	-	1.61471	0.0229	0.00748	0.395	|	1.08385	0.00809	0.00382	0.682	|	2	62	0.0322581	0	35	0	1	77	0.012987	1	56	0.0178571	2	53	0.0377358	1	56	0.0178571	|	3	54	0.0555556	0	44	0
chr1	68996503	-	T	chr1:68996503	Erbb4	LINE	Intron	intron_variant	0	0	-	-	-	-	1.80624	0.033	0.00944	0.384	|	1.99566	0.0172	0.00431	0.537	|	3	81	0.037037	0	40	0	2	88	0.0227273	2	69	0.0289855	2	70	0.0285714	3	69	0.0434783	|	4	50	0.08	0	46	0
chr1	68997257	-	T	chr1:68997257	Erbb4	.	Intron	intron_variant	0	0	68996996	261	downstream	intronic	1.80405	0.025	0.00717	0.377	|	-2.18627	0.00243	0.011	0.389	|	3	76	0.0394737	0	54	0	1	107	0.00934579	2	74	0.027027	1	111	0.00900901	4	62	0.0645161	|	0	53	0	4	54	0.0740741
chr1	69000266	-	T	chr1:69000266	Erbb4	LINE	Intron	intron_variant	0	0	-	-	-	-	0.834421	0.0362	0.0203	0.131	|	1.27985	0.0375	0.0154	0.589	|	1	45	0.0222222	1	53	0.0188679	1	50	0.02	2	57	0.0350877	1	41	0.0243902	2	36	0.0555556	|	0	20	0	3	34	0.0882353
chr1	69000277	-	T	chr1:69000277	Erbb4	LINE	Intron	intron_variant	0	0	-	-	-	-	-2.11702	0.0026	0.0113	0.398	|	2.53632	0.0843	0.0145	0.328	|	2	49	0.0408163	0	59	0	2	57	0.0350877	1	57	0.0175439	0	45	0	0	38	0	|	0	23	0	1	31	0.0322581
chr1	69000295	-	T	chr1:69000295	Erbb4	LINE	Intron	intron_variant	0	0	-	-	-	-	-0.302324	0.0606	0.0748	0.768	|	-0.185312	0.0728	0.0828	0.824	|	8	57	0.140351	4	62	0.0645161	3	65	0.0461538	2	63	0.031746	2	53	0.0377358	8	43	0.186047	|	2	29	0.0689655	5	32	0.15625
chr1	69000328	-	T	chr1:69000328	Erbb4	LINE	Intron	intron_variant	0	0	-	-	-	-	-0.309165	0.0875	0.108	0.741	|	0.626017	0.197	0.127	0.387	|	13	58	0.224138	3	56	0.0535714	7	66	0.106061	2	54	0.037037	5	44	0.113636	7	44	0.159091	|	2	33	0.0606061	6	32	0.1875
chr1	69000342	-	T	chr1:69000342	Erbb4	LINE	Intron	intron_variant	0	0	-	-	-	-	-1.29739	0.0194	0.0476	0.617	|	0.30417	0.151	0.122	0.688	|	7	54	0.12963	1	53	0.0188679	3	68	0.0441176	0	48	0	3	43	0.0697674	5	48	0.104167	|	2	36	0.0555556	6	38	0.157895
chr1	69000354	-	T	chr1:69000354	Erbb4	LINE	Intron	intron_variant	0	0	69000369	15	upstream	intronic	1.69336	0.0102	0.00315	0.515	|	1.69539	0.0463	0.0143	0.487	|	0	50	0	0	46	0	2	64	0.03125	0	44	0	1	44	0.0227273	2	43	0.0465116	|	0	37	0	1	36	0.0277778
chr1	69000361	-	T	chr1:69000361	Erbb4	LINE	Intron	intron_variant	0	0	69000359	2	downstream	intronic	1.54795	0.00292	0.001	0.423	|	1.40187	0.0118	0.00445	0.644	|	0	45	0	0	42	0	0	60	0	0	43	0	0	43	0	1	40	0.025	|	0	35	0	3	34	0.0882353
chr1	69000369	-	T	chr1:69000369	Erbb4	LINE	Intron	intron_variant	0	0	69000353	16	downstream	intronic	3.3726	0.0104	0.001	0.186	|	3.55654	0.0375	0.00318	0.165	|	0	44	0	0	42	0	0	58	0	0	40	0	2	45	0.0444444	1	40	0.025	|	0	35	0	1	31	0.0322581
chr1	69000377	-	T	chr1:69000377	Erbb4	LINE	Intron	intron_variant	0	0	-	-	-	-	0.48736	0.0919	0.0655	0.562	|	0.101549	0.185	0.173	0.88	|	6	42	0.142857	1	35	0.0285714	4	58	0.0689655	2	34	0.0588235	5	41	0.121951	4	37	0.108108	|	3	34	0.0882353	9	28	0.321429
chr1	69000404	-	T	chr1:69000404	Erbb4	LINE	Intron	intron_variant	0	0	-	-	-	-	-0.134452	0.0029	0.00318	0.956	|	1.53151	0.0102	0.00352	0.576	|	1	31	0.0322581	0	20	0	0	47	0	0	33	0	1	41	0.0243902	0	33	0	|	0	36	0	0	19	0
chr1	69006313	-	T	chr1:69006313	Erbb4	LINE	Intron	intron_variant	0	0	-	-	-	-	-2.33274	0.0102	0.0515	0.309	|	4.02453	0.0163	0.001	0.188	|	5	44	0.113636	2	32	0.0625	1	52	0.0192308	1	48	0.0208333	0	38	0	2	39	0.0512821	|	0	16	0	0	17	0
chr1	69009183	-	T	chr1:69009183	Erbb4	LINE	Intron	intron_variant	0	0	-	-	-	-	2.12694	0.0247	0.00567	0.568	|	-0.720331	0.0135	0.0223	0.818	|	0	25	0	2	11	0.181818	0	15	0	2	12	0.166667	1	11	0.0909091	0	8	0	|	1	9	0.111111	2	20	0.1
chr1	69009184	-	T	chr1:69009184	Erbb4	LINE	Intron	intron_variant	0	0	-	-	-	-	-1.6863	0.0196	0.0632	0.516	|	1.87829	0.0135	0.00368	0.519	|	1	24	0.0416667	1	11	0.0909091	1	15	0.0666667	1	12	0.0833333	1	11	0.0909091	0	8	0	|	0	10	0	1	20	0.05
chr1	69009206	-	T	chr1:69009206	Erbb4	LINE	Intron	intron_variant	0	0	-	-	-	-	-1.81407	0.001	0.00352	0.423	|	3.52175	0.0115	0.001	0.185	|	1	23	0.0434783	0	11	0	0	21	0	0	13	0	0	10	0	0	9	0	|	0	11	0	0	22	0
chr1	69009211	-	T	chr1:69009211	Erbb4	LINE	Intron	intron_variant	0	0	69009209	2	downstream	Intron	-2.44994	0.0411	0.224	0.458	|	2.97779	0.23	0.0292	0.346	|	3	23	0.130435	4	11	0.363636	5	21	0.238095	3	13	0.230769	3	10	0.3	0	9	0	|	2	11	0.181818	3	22	0.136364
chr1	69009215	-	T	chr1:69009215	Erbb4	LINE	Intron	intron_variant	0	0	-	-	-	-	-4.05216	0.00523	0.0867	0.229	|	-3.25646	0.0156	0.149	0.242	|	3	23	0.130435	1	10	0.1	1	20	0.05	2	14	0.142857	0	11	0	0	10	0	|	2	11	0.181818	2	22	0.0909091
chr1	69009246	-	T	chr1:69009246	Erbb4	LINE	Intron	intron_variant	0	0	-	-	-	-	-5.93113	0.00425	0.259	0.104	|	-0.675491	0.0273	0.0437	0.861	|	4	19	0.210526	3	11	0.272727	7	23	0.304348	1	13	0.0769231	0	9	0	0	7	0	|	3	9	0.333333	0	9	0
chr1	69009247	-	T	chr1:69009247	Erbb4	LINE	Intron	intron_variant	0	0	-	-	-	-	-0.366292	0.0204	0.0264	0.915	|	1.43007	0.0163	0.00606	0.688	|	2	19	0.105263	0	11	0	4	23	0.173913	1	13	0.0769231	1	9	0.111111	0	7	0	|	2	9	0.222222	0	9	0
chr1	69009256	-	T	chr1:69009256	Erbb4	LINE	Intron	intron_variant	0	0	-	-	-	-	-0.138346	0.00437	0.00481	0.967	|	0	0.00464	0.00464	1	|	0	19	0	0	10	0	2	18	0.111111	1	12	0.0833333	0	8	0	0	7	0	|	1	10	0.1	0	10	0
chr1	69009258	-	T	chr1:69009258	Erbb4	LINE	Intron	intron_variant	0	0	-	-	-	-	-4.59225	0.00437	0.105	0.156	|	3.96239	0.104	0.00669	0.284	|	1	19	0.0526316	2	10	0.2	2	18	0.111111	1	12	0.0833333	0	8	0	0	8	0	|	3	10	0.3	0	10	0
chr1	69009302	-	T	chr1:69009302	Erbb4	LINE	Intron	intron_variant	0	0	-	-	-	-	0.120857	0.00415	0.00382	0.968	|	-5.08325	0.00397	0.135	0.109	|	0	12	0	0	11	0	1	18	0.0555556	1	14	0.0714286	0	9	0	0	11	0	|	3	7	0.428571	1	8	0.125
chr1	69009306	-	T	chr1:69009306	Erbb4	LINE	Intron	intron_variant	0	0	-	-	-	-	-0.386624	0.304	0.397	0.446	|	1.92981	0.246	0.0645	0.588	|	3	12	0.25	5	10	0.5	9	18	0.5	6	13	0.461538	2	9	0.222222	3	11	0.272727	|	5	7	0.714286	3	8	0.375
chr1	69018649	-	T	chr1:69018649	Erbb4	LINE	Intron	intron_variant	0	0	-	-	-	-	-1.9455	0.001	0.00385	0.423	|	3.81324	0.0141	0.001	0.184	|	0	38	0	0	27	0	2	35	0.0571429	0	27	0	0	44	0	0	31	0	|	0	13	0	0	6	0
chr1	69037319	-	T	chr1:69037319	Erbb4	LINE	Intron	intron_variant	0	0	-	-	-	-	0.336902	0.0679	0.0537	0.589	|	0.761801	0.00572	0.00338	0.818	|	1	23	0.0434783	1	29	0.0344828	3	29	0.103448	1	20	0.05	2	32	0.0625	4	40	0.1	|	0	13	0	0	9	0
chr1	69037326	-	T	chr1:69037326	Erbb4	LINE	Intron	intron_variant	0	0	69038470	1144	upstream	intronic	-0.215808	0.327	0.38	0.588	|	1.1624	0.428	0.191	0.16	|	9	25	0.36	8	30	0.266667	16	28	0.571429	7	26	0.269231	11	33	0.333333	16	41	0.390244	|	2	17	0.117647	4	10	0.4
chr1	69037344	-	T	chr1:69037344	Erbb4	LINE	Intron	intron_variant	0	0	69038452	1108	upstream	intronic	0.503084	0.098	0.0692	0.461	|	2.40052	0.0947	0.0179	0.383	|	1	28	0.0357143	4	32	0.125	2	27	0.0740741	5	34	0.147059	3	38	0.0789474	3	37	0.0810811	|	3	20	0.15	0	14	0
chr1	69037346	-	T	chr1:69037346	Erbb4	LINE	Intron	intron_variant	0	0	69038451	1105	upstream	intronic	2.25881	0.0609	0.0127	0.345	|	-2.18334	0.0138	0.0627	0.369	|	0	28	0	2	36	0.0555556	1	27	0.037037	2	35	0.0571429	3	38	0.0789474	2	40	0.05	|	1	20	0.05	1	15	0.0666667
chr1	69037362	-	T	chr1:69037362	Erbb4	LINE	Intron	intron_variant	0	0	-	-	-	-	0.116059	0.152	0.14	0.821	|	2.66744	0.093	0.0146	0.302	|	6	37	0.162162	4	38	0.105263	6	37	0.162162	5	43	0.116279	12	44	0.272727	6	54	0.111111	|	0	23	0	1	22	0.0454545
chr1	69037365	-	T	chr1:69037365	Erbb4	LINE	Intron	intron_variant	0	0	69038430	1065	upstream	intronic	-0.139199	0.0985	0.109	0.819	|	1.24334	0.122	0.0515	0.114	|	2	37	0.0540541	5	40	0.125	7	37	0.189189	4	43	0.0930233	5	45	0.111111	5	54	0.0925926	|	2	23	0.0869565	1	22	0.0454545
chr1	69037436	-	T	chr1:69037436	Erbb4	LINE	Intron	intron_variant	0	0	69038326	890	upstream	intronic	0.432576	0.0859	0.0637	0.631	|	0.261974	0.105	0.0872	0.656	|	1	44	0.0227273	4	32	0.125	3	33	0.0909091	8	70	0.114286	3	45	0.0666667	4	48	0.0833333	|	3	25	0.12	3	31	0.0967742
chr1	69037443	-	T	chr1:69037443	Erbb4	LINE	Intron	intron_variant	0	0	-	-	-	-	0.70851	0.243	0.148	0.388	|	0.843366	0.289	0.161	0.192	|	3	45	0.0666667	5	32	0.15625	11	35	0.314286	15	70	0.214286	12	45	0.266667	12	48	0.25	|	7	24	0.291667	3	29	0.103448
chr1	69038417	-	T	chr1:69038417	Erbb4	LINE	Intron	intron_variant	0	0	69037378	1039	downstream	intronic	0.271481	0.00469	0.00389	0.932	|	1.90396	0.0111	0.00297	0.463	|	0	30	0	0	34	0	2	34	0.0588235	3	29	0.103448	0	34	0	0	28	0	|	0	27	0	0	15	0
chr1	69038432	-	T	chr1:69038432	Erbb4	LINE	Intron	intron_variant	0	0	69037363	1069	downstream	intronic	0.094461	0.526	0.493	0.655	|	0.393798	0.616	0.469	0.376	|	16	27	0.592593	16	35	0.457143	15	34	0.441176	14	28	0.5	16	35	0.457143	21	33	0.636364	|	13	26	0.5	11	16	0.6875
chr1	69038433	-	T	chr1:69038433	Erbb4	LINE	Intron	intron_variant	0	0	69037363	1070	downstream	intronic	0.0829883	0.236	0.223	0.747	|	0.753968	0.18	0.106	0.235	|	6	27	0.222222	9	35	0.257143	7	36	0.194444	5	27	0.185185	8	34	0.235294	10	33	0.30303	|	4	26	0.153846	1	17	0.0588235
chr1	69038435	-	T	chr1:69038435	Erbb4	LINE	Intron	intron_variant	0	0	69037361	1074	downstream	intronic	0.0606659	0.057	0.0547	0.928	|	-1.61439	0.00401	0.0123	0.583	|	1	27	0.037037	2	34	0.0588235	3	40	0.075	3	28	0.107143	2	34	0.0588235	1	34	0.0294118	|	0	26	0	1	18	0.0555556
chr1	69038461	-	T	chr1:69038461	Erbb4	LINE	Intron	intron_variant	0	0	69037336	1125	downstream	intronic	0.482995	0.118	0.0845	0.558	|	-0.395627	0.151	0.198	0.663	|	3	26	0.115385	3	40	0.075	3	43	0.0697674	6	26	0.230769	2	42	0.047619	6	40	0.15	|	6	17	0.352941	4	16	0.25
chr1	69038462	-	T	chr1:69038462	Erbb4	LINE	Intron	intron_variant	0	0	69037336	1126	downstream	intronic	3.98105	0.065	0.00412	0.181	|	-0.561018	0.0148	0.0218	0.862	|	0	26	0	0	40	0	3	43	0.0697674	4	26	0.153846	3	42	0.0714286	1	40	0.025	|	3	17	0.176471	0	16	0
chr1	69038468	-	T	chr1:69038468	Erbb4	LINE	Intron	intron_variant	0	0	69037328	1140	downstream	intronic	0.233781	0.195	0.166	0.716	|	-0.352529	0.117	0.15	0.699	|	6	27	0.222222	6	42	0.142857	7	49	0.142857	10	27	0.37037	5	49	0.102041	8	41	0.195122	|	5	18	0.277778	4	17	0.235294
chr1	69038518	-	T	chr1:69038518	Erbb4	LINE	Intron	intron_variant	0	0	-	-	-	-	1.02021	0.0861	0.0424	0.156	|	0.660665	0.101	0.064	0.478	|	1	26	0.0384615	1	38	0.0263158	4	53	0.0754717	4	29	0.137931	3	53	0.0566038	4	49	0.0816327	|	3	21	0.142857	1	28	0.0357143
chr1	74581767	-	T	chr1:74581767	Zfp142	SINE	Intron	NMD_transcript_variant	0	0	74582243	476	upstream	intronic	-1.93195	0.001	0.00382	0.423	|	0.12399	0.00389	0.00357	0.965	|	0	10	0	0	6	0	1	18	0.0555556	0	19	0	0	15	0	0	6	0	|	0	17	0	0	7	0
chr1	74581781	-	T	chr1:74581781	Zfp142	SINE	Intron	NMD_transcript_variant	0	0	74580857	924	downstream	intronic	2.05281	0.00415	0.001	0.423	|	4.29572	0.0196	0.001	0.184	|	0	12	0	0	7	0	0	20	0	1	14	0.0714286	0	18	0	0	9	0	|	0	15	0	0	9	0
chr1	74581784	-	T	chr1:74581784	Zfp142	SINE	Intron	NMD_transcript_variant	0	0	74580856	928	downstream	intronic	0	0.001	0.001	---	|	2.16878	0.0045	0.001	0.423	|	0	12	0	0	8	0	0	20	0	0	14	0	0	18	0	0	9	0	|	0	16	0	0	9	0
chr1	74675816	+	A	chr1:74675816	Ttll4	SINE	Intron	intron_variant	0	0	-	-	-	-	2.26529	0.00481	0.001	0.423	|	0	0.001	0.001	---	|	0	22	0	0	7	0	0	11	0	1	9	0.111111	0	11	0	0	11	0	|	0	6	0	0	5	0
chr1	74676880	+	A	chr1:74676880	Ttll4	SINE	Intron	intron_variant	0	0	74674399	2481	upstream	intronic	-1.6318	0.00585	0.0181	0.647	|	2.44064	0.0271	0.005	0.505	|	1	12	0.0833333	0	8	0	1	14	0.0714286	0	5	0	3	15	0.2	0	7	0	|	1	8	0.125	0	7	0
chr1	74676888	+	A	chr1:74676888	Ttll4	SINE	Intron	intron_variant	0	0	74675704	1184	upstream	intronic	0.915062	0.403	0.214	0.222	|	-2.28875	0.0457	0.223	0.494	|	1	8	0.125	2	11	0.181818	6	14	0.428571	2	5	0.4	4	14	0.285714	4	7	0.571429	|	1	6	0.166667	1	5	0.2
chr1	74676896	+	A	chr1:74676896	Ttll4	SINE	Intron	intron_variant	0	0	74675696	1200	upstream	intronic	-2.46027	0.001	0.0055	0.423	|	-2.38614	0.001	0.00523	0.423	|	0	8	0	2	12	0.166667	0	12	0	0	7	0	0	14	0	0	7	0	|	0	5	0	0	5	0
chr1	74676913	+	A	chr1:74676913	Ttll4	SINE	Intron	intron_variant	0	0	-	-	-	-	-1.9239	0.0431	0.163	0.557	|	-2.54795	0.001	0.00585	0.423	|	2	11	0.181818	5	16	0.3125	1	13	0.0769231	4	10	0.4	3	15	0.2	0	8	0	|	1	5	0.2	0	5	0
chr1	74676918	+	A	chr1:74676918	Ttll4	SINE	Intron	intron_variant	0	0	-	-	-	-	-2.51692	0.001	0.00572	0.423	|	0.107309	0.0063	0.00585	0.978	|	0	12	0	3	16	0.1875	0	13	0	0	10	0	0	15	0	0	8	0	|	0	5	0	1	5	0.2
chr1	74676924	+	A	chr1:74676924	Ttll4	SINE	Intron	intron_variant	0	0	-	-	-	-	0	0.001	0.001	---	|	2.26529	0.00481	0.001	0.423	|	0	12	0	0	16	0	0	13	0	0	10	0	0	15	0	0	8	0	|	0	6	0	0	6	0
chr1	74676926	+	A	chr1:74676926	Ttll4	SINE	Intron	intron_variant	0	0	-	-	-	-	2.08845	0.00425	0.001	0.423	|	0	0.001	0.001	---	|	0	12	0	0	16	0	0	13	0	0	10	0	1	13	0.0769231	0	9	0	|	0	6	0	0	6	0
chr1	75509436	+	A	chr1:75509436	Gm15181,Inha,Obsl1	.	Exon	missense_variant	0	0	-	-	-	-	-0.0135697	0.0976	0.0985	0.991	|	-0.0100313	0.0561	0.0565	0.99	|	6	32	0.1875	1	28	0.0357143	5	35	0.142857	8	44	0.181818	1	34	0.0294118	4	23	0.173913	|	1	42	0.0238095	3	29	0.103448
chr1	79701631	-	T	chr1:79701631	Wdfy1	SINE	intergenic	downstream_gene_variant	1	1	-	-	-	-	0.917636	0.538	0.285	0.0718	|	-1.15544	0.0255	0.0569	0.774	|	4	10	0.4	3	13	0.230769	4	16	0.25	10	25	0.4	14	18	0.777778	6	12	0.5	|	7	18	0.388889	0	9	0
chr1	79704070	-	T	chr1:79704070	Wdfy1	SINE	UTR	3_prime_UTR_variant	0	0	-	-	-	-	-1.18717	0.0859	0.196	0.281	|	0.806777	0.199	0.114	0.431	|	3	23	0.130435	5	21	0.238095	7	29	0.241379	4	15	0.266667	1	21	0.047619	1	20	0.05	|	1	26	0.0384615	4	21	0.190476
chr1	79704080	-	T	chr1:79704080	Wdfy1	SINE	UTR	3_prime_UTR_variant	0	0	-	-	-	-	-2.06147	0.024	0.1	0.467	|	2.86484	0.108	0.0148	0.28	|	2	27	0.0740741	3	20	0.15	3	33	0.0909091	2	12	0.166667	0	24	0	2	24	0.0833333	|	2	27	0.0740741	1	23	0.0434783
chr1	79704082	-	T	chr1:79704082	Wdfy1	SINE	UTR	3_prime_UTR_variant	0	0	-	-	-	-	-2.32802	0.012	0.0603	0.325	|	0.673687	0.00561	0.00352	0.838	|	4	26	0.153846	1	20	0.05	1	35	0.0285714	0	12	0	1	24	0.0416667	1	24	0.0416667	|	0	27	0	1	23	0.0434783
chr1	79704099	-	T	chr1:79704099	Wdfy1	SINE	UTR	3_prime_UTR_variant	0	0	-	-	-	-	-3.2453	0.0102	0.0966	0.193	|	4.55009	0.0659	0.00281	0.0844	|	3	33	0.0909091	3	31	0.0967742	4	39	0.102564	0	26	0	1	35	0.0285714	1	27	0.037037	|	1	45	0.0222222	0	28	0
chr1	79704144	-	T	chr1:79704144	Wdfy1	SINE	UTR	3_prime_UTR_variant	0	0	-	-	-	-	-3.371	0.001	0.0103	0.184	|	1.08273	0.0255	0.012	0.613	|	2	63	0.031746	0	57	0	3	86	0.0348837	0	51	0	0	67	0	0	50	0	|	0	70	0	3	52	0.0576923
chr1	79794474	-	T	chr1:79794474	Serpine2	.	UTR	3_prime_UTR_variant	0	0	-	-	-	-	0.55897	0.00489	0.00332	0.748	|	0.475767	0.0116	0.00833	0.792	|	1	298	0.0033557	0	181	0	3	276	0.0108696	0	253	0	5	233	0.0214592	1	184	0.00543478	|	3	165	0.0181818	0	86	0
chr1	79794495	-	T	chr1:79794495	Serpine2	.	UTR	3_prime_UTR_variant	0	0	-	-	-	-	-1.31574	0.0101	0.0252	0.00307	|	-0.582288	0.00598	0.00895	0.79	|	7	246	0.0284553	4	158	0.0253165	5	226	0.0221239	2	237	0.00843882	2	198	0.010101	2	165	0.0121212	|	0	136	0	2	84	0.0238095
chr1	80307136	-	T	chr1:80307136	Cul3	SINE	Intron	NMD_transcript_variant	0	0	80305207	1929	downstream	intronic	-2.05281	0.001	0.00415	0.423	|	2.08111	0.0182	0.00431	0.523	|	2	28	0.0714286	0	20	0	0	18	0	0	26	0	0	7	0	0	16	0	|	0	14	0	0	6	0
chr1	81101298	+	A	chr1:81101298	Nyap2	LINE	Intron	intron_variant	0	0	-	-	-	-	-2.24566	0.00464	0.022	0.517	|	2.59862	0.00606	0.001	0.423	|	0	28	0	1	15	0.0666667	4	25	0.16	0	26	0	0	26	0	2	20	0.1	|	0	5	0	0	6	0
chr1	81101323	+	A	chr1:81101323	Nyap2	LINE	Intron	intron_variant	0	0	-	-	-	-	0.407464	0.00481	0.00362	0.896	|	4.12822	0.0175	0.001	0.185	|	0	22	0	0	16	0	1	21	0.047619	0	20	0	0	15	0	2	18	0.111111	|	0	9	0	0	5	0
chr1	81101332	+	A	chr1:81101332	Nyap2	LINE	Intron	intron_variant	0	0	-	-	-	-	-2.40512	0.005	0.0265	0.509	|	4.68707	0.0258	0.001	0.184	|	0	22	0	3	17	0.176471	2	19	0.105263	0	17	0	0	17	0	2	16	0.125	|	0	8	0	0	6	0
chr1	81101343	+	A	chr1:81101343	Nyap2	LINE	Intron	intron_variant	0	0	-	-	-	-	-2.17909	0.00511	0.0231	0.541	|	3.91063	0.015	0.001	0.185	|	0	20	0	2	19	0.105263	2	17	0.117647	0	21	0	0	15	0	2	15	0.133333	|	0	7	0	0	6	0
chr1	81334055	+	A	chr1:81334055	Nyap2	SINE	Intron	intron_variant	0	0	-	-	-	-	-2.21376	0.00329	0.0153	0.455	|	0.226024	0.00585	0.005	0.951	|	2	17	0.117647	0	17	0	1	33	0.030303	0	30	0	0	25	0	1	28	0.0357143	|	1	8	0.125	0	12	0
chr1	82747397	+	A	chr1:82747397	Mff	SINE	Intron	non_coding_transcript_variant	0	0	-	-	-	-	3.62906	0.0124	0.001	0.187	|	-5.65751	0.001	0.0505	0.00662	|	0	17	0	0	16	0	0	24	0	1	16	0.0625	1	33	0.030303	0	18	0	|	1	18	0.0555556	1	12	0.0833333
chr1	82876701	+	A	chr1:82876701	Agfg1	SINE	Intron	intron_variant	0	0	82874944	1757	upstream	intronic	-0.0506677	0.00894	0.00926	0.983	|	0.348131	0.00422	0.00331	0.904	|	1	45	0.0222222	1	28	0.0357143	0	48	0	2	50	0.04	0	60	0	1	56	0.0178571	|	0	34	0	0	16	0
chr1	82887865	+	A	chr1:82887865	Agfg1	SINE	Intron	intron_variant	0	0	82887596	269	upstream	intronic	-2.48074	0.001	0.00558	0.423	|	0	0.001	0.001	---	|	0	11	0	4	23	0.173913	0	19	0	0	15	0	0	17	0	0	17	0	|	0	12	0	0	12	0
chr1	84732025	-	T	chr1:84732025	Trip12	.	Exon	missense_variant	0	0	-	-	-	-	5.4265	0.196	0.00457	0.131	|	-2.87855	0.0306	0.225	0.364	|	0	12	0	0	13	0	2	21	0.0952381	2	12	0.166667	5	20	0.25	2	11	0.181818	|	3	8	0.375	2	11	0.181818
chr1	84775192	-	T	chr1:84775192	Trip12	SINE	Intron	NMD_transcript_variant	0	0	-	-	-	-	2.48265	0.0251	0.0045	0.479	|	0	0.001	0.001	---	|	0	22	0	0	15	0	2	22	0.0909091	0	17	0	2	18	0.111111	2	14	0.142857	|	0	6	0	0	6	0
chr1	84775193	-	T	chr1:84775193	Trip12	SINE	Intron	NMD_transcript_variant	0	0	-	-	-	-	-0.435368	0.18	0.243	0.647	|	-5.27734	0.001	0.0388	0.185	|	5	21	0.238095	4	15	0.266667	5	22	0.227273	1	17	0.0588235	5	18	0.277778	5	14	0.357143	|	0	6	0	1	6	0.166667
chr1	84775534	-	T	chr1:84775534	Trip12	SINE	Intron	NMD_transcript_variant	1	1	-	-	-	-	-2.18495	0.00357	0.0162	0.468	|	-2.1666	0.00368	0.0165	0.477	|	0	18	0	1	13	0.0769231	1	18	0.0555556	0	22	0	1	22	0.0454545	0	21	0	|	0	14	0	1	13	0.0769231
chr1	84775558	-	T	chr1:84775558	Trip12	SINE	Intron	NMD_transcript_variant	0	0	84775197	361	downstream	intronic	0	0.001	0.001	---	|	-0.480191	0.0138	0.0193	0.876	|	0	16	0	0	15	0	0	22	0	0	22	0	0	20	0	0	18	0	|	0	19	0	2	14	0.142857
chr1	84775563	-	T	chr1:84775563	Trip12	SINE	Intron	NMD_transcript_variant	0	0	84775931	368	upstream	Intron	-2.66607	0.0223	0.142	0.356	|	0.172616	0.0278	0.0247	0.962	|	3	16	0.1875	1	15	0.0666667	5	22	0.227273	0	22	0	2	20	0.1	2	18	0.111111	|	1	19	0.0526316	0	13	0
chr1	84775569	-	T	chr1:84775569	Trip12	SINE	Intron	NMD_transcript_variant	0	0	-	-	-	-	-2.41381	0.00443	0.0236	0.484	|	-0.45137	0.0181	0.0247	0.893	|	2	16	0.125	0	14	0	2	19	0.105263	2	23	0.0869565	0	21	0	0	15	0	|	2	19	0.105263	0	12	0
chr1	84906005	-	T	chr1:84906005	Slc16a14	SINE	UTR	3_prime_UTR_variant	0	0	-	-	-	-	-2.05281	0.001	0.00415	0.423	|	0	0.001	0.001	---	|	0	9	0	1	14	0.0714286	0	20	0	0	23	0	0	23	0	0	19	0	|	0	19	0	0	11	0
chr1	86087378	+	A	chr1:86087378	Gm22786,Psmd1	.	Exon	regulatory_region_variant	1	1	-	-	-	-	0.114211	0.276	0.255	0.196	|	-0.00918738	0.261	0.263	0.96	|	39	142	0.274648	27	109	0.247706	33	136	0.242647	21	76	0.276316	42	144	0.291667	40	154	0.25974	|	20	85	0.235294	6	19	0.315789
chr1	87345496	+	A	chr1:87345496	Gigyf2,Gm22549	SINE	Intron	regulatory_region_variant	0	0	87343745	1751	upstream	intronic	0.333333	0.00481	0.00382	0.916	|	2.21462	0.00464	0.001	0.423	|	1	18	0.0555556	0	11	0	0	13	0	0	12	0	0	14	0	1	9	0.111111	|	0	12	0	0	9	0
chr1	87352841	+	A	chr1:87352841	Gigyf2	SINE	Intron	non_coding_transcript_variant	0	0	87352511	330	upstream	intronic	1.67275	0.105	0.0329	0.579	|	0.54581	0.00606	0.00415	0.877	|	0	6	0	2	7	0.285714	1	8	0.125	1	12	0.0833333	1	9	0.111111	1	8	0.125	|	1	14	0.0714286	0	7	0
chr1	87352844	+	A	chr1:87352844	Gigyf2	SINE	Intron	non_coding_transcript_variant	0	0	87352509	335	upstream	intronic	4.74371	0.0268	0.001	0.189	|	0	0.001	0.001	---	|	0	6	0	0	7	0	0	7	0	1	13	0.0769231	0	9	0	2	8	0.25	|	0	15	0	0	7	0
chr1	87399881	+	A	chr1:87399881	Gigyf2	SINE	Intron	non_coding_transcript_variant	0	0	-	-	-	-	2.32193	0.005	0.001	0.423	|	0	0.001	0.001	---	|	0	8	0	0	13	0	0	21	0	0	11	0	2	16	0.125	0	7	0	|	0	11	0	0	6	0
chr1	87399912	+	A	chr1:87399912	Gigyf2	SINE	Intron	non_coding_transcript_variant	0	0	-	-	-	-	-0.112345	0.0265	0.0286	0.975	|	5.08236	0.123	0.00362	0.11	|	0	8	0	4	19	0.210526	2	18	0.111111	0	21	0	3	18	0.166667	1	9	0.111111	|	0	9	0	0	7	0
chr1	87953060	-	T	chr1:87953060	Usp40	SINE	Intron	NMD_transcript_variant	0	0	-	-	-	-	-3.90575	0.001	0.015	0.194	|	3.79361	0.0139	0.001	0.185	|	0	6	0	2	18	0.111111	1	33	0.030303	0	20	0	0	22	0	0	11	0	|	0	22	0	0	5	0
chr1	88272091	-	T	chr1:88272091	Hjurp	SINE	Intron	non_coding_transcript_variant	0	0	-	-	-	-	0.138346	0.00362	0.00329	0.959	|	-2.1113	0.00415	0.0179	0.516	|	0	17	0	1	28	0.0357143	0	18	0	1	21	0.047619	0	24	0	0	19	0	|	3	22	0.136364	0	8	0
chr1	88272158	-	T	chr1:88272158	Hjurp	SINE	Intron	non_coding_transcript_variant	1	1	-	-	-	-	1.34562	0.0124	0.00487	0.67	|	1.88967	0.0498	0.0135	0.423	|	0	21	0	3	26	0.115385	0	29	0	1	24	0.0416667	0	20	0	1	22	0.0454545	|	2	31	0.0645161	0	14	0
chr1	91391600	-	T	chr1:91391600	Ilkap	SINE	Intron	non_coding_transcript_variant	0	0	-	-	-	-	0.0814729	0.19	0.179	0.895	|	-0.0303826	0.189	0.194	0.94	|	2	11	0.181818	1	9	0.111111	4	14	0.285714	2	10	0.2	4	13	0.307692	1	9	0.111111	|	5	23	0.217391	3	18	0.166667
chr1	91392781	-	T	chr1:91392781	Ilkap	SINE	Intron	non_coding_transcript_variant	1	1	91391806	975	downstream	Intron	2.80441	0.0283	0.00405	0.429	|	2.43358	0.163	0.0301	0.435	|	1	15	0.0666667	0	13	0	0	11	0	7	28	0.25	1	11	0.0909091	0	22	0	|	3	10	0.3	1	11	0.0909091
chr1	91392789	-	T	chr1:91392789	Ilkap	SINE	Intron	non_coding_transcript_variant	1	1	91393749	960	upstream	intronic	3.98847	0.0811	0.00511	0.229	|	0.189674	0.182	0.159	0.568	|	2	15	0.133333	0	13	0	0	11	0	4	31	0.129032	1	11	0.0909091	1	22	0.0454545	|	2	10	0.2	2	11	0.181818
chr1	91392845	-	T	chr1:91392845	Ilkap	SINE	Intron	non_coding_transcript_variant	0	0	-	-	-	-	0	0.001	0.001	---	|	-2.21462	0.001	0.00464	0.423	|	0	13	0	0	10	0	0	7	0	0	9	0	0	5	0	0	14	0	|	0	8	0	1	10	0.1
chr1	91394592	-	T	chr1:91394592	Ilkap	SINE	Intron	non_coding_transcript_variant	0	0	91392800	1792	downstream	intronic	4.3726	0.0207	0.001	0.186	|	-2.32528	0.00382	0.0191	0.464	|	0	15	0	0	6	0	0	15	0	2	15	0.133333	0	11	0	1	15	0.0666667	|	1	11	0.0909091	1	13	0.0769231
chr1	93440783	-	T	chr1:93440783	Hdlbp	.	UTR	5_prime_UTR_variant	0	0	-	-	-	-	-0.0724523	0.00956	0.0101	0.977	|	2.09742	0.0384	0.00898	0.318	|	0	56	0	1	41	0.0243902	2	48	0.0416667	2	52	0.0384615	0	43	0	1	44	0.0227273	|	1	46	0.0217391	0	36	0
chr1	93484749	+	A	chr1:93484749	2002-09-01	SINE	Intron	non_coding_transcript_variant	0	0	-	-	-	-	-0.32475	0.0534	0.0669	0.638	|	-0.252676	0.116	0.139	0.676	|	1	29	0.0344828	2	20	0.1	2	23	0.0869565	1	24	0.0416667	1	26	0.0384615	2	21	0.0952381	|	3	24	0.125	4	17	0.235294
chr1	93796125	+	A	chr1:93796125	Dtymk	SINE	Intron	intron_variant	0	0	93795310	815	upstream	intronic	0	0.001	0.001	---	|	4.34156	0.0203	0.001	0.184	|	0	6	0	0	7	0	0	12	0	0	8	0	0	5	0	0	7	0	|	0	12	0	0	6	0
chr1	93797905	-	T	chr1:93797905	Dtymk	SINE	Intron	intron_variant	0	0	-	-	-	-	4.64086	0.0249	0.001	0.189	|	0	0.001	0.001	---	|	0	7	0	0	7	0	0	11	0	0	9	0	5	23	0.217391	1	14	0.0714286	|	0	13	0	0	7	0
chr1	97751683	-	T	chr1:97751683	Ppip5k2	SINE	Intron	intron_variant	0	0	-	-	-	-	2.60197	0.0241	0.00397	0.444	|	-0.595651	0.121	0.183	0.612	|	0	6	0	0	6	0	1	16	0.0625	1	13	0.0769231	0	10	0	2	11	0.181818	|	2	14	0.142857	1	13	0.0769231
chr1	97751684	-	T	chr1:97751684	Ppip5k2	SINE	Intron	intron_variant	0	0	-	-	-	-	2.21462	0.00464	0.001	0.423	|	-0.457305	0.0852	0.117	0.537	|	0	6	0	0	6	0	0	16	0	0	13	0	0	10	0	1	10	0.1	|	1	13	0.0769231	1	12	0.0833333
chr1	97751685	-	T	chr1:97751685	Ppip5k2	SINE	Intron	intron_variant	0	0	-	-	-	-	2.17613	0.0249	0.0055	0.555	|	-0.531436	0.123	0.178	0.612	|	0	6	0	1	6	0.166667	0	16	0	2	13	0.153846	0	10	0	1	10	0.1	|	2	13	0.153846	1	12	0.0833333
chr1	97862727	-	T	chr1:97862727	Pam	SINE	Intron	non_coding_transcript_variant	0	0	-	-	-	-	4.12674	0.0944	0.0054	0.232	|	0.29149	0.0055	0.0045	0.934	|	0	12	0	3	19	0.157895	0	21	0	2	24	0.0833333	3	27	0.111111	2	22	0.0909091	|	0	14	0	0	8	0
chr1	97895963	-	T	chr1:97895963	Pam	.	Intron	splice_region_variant	1	1	-	-	-	-	3.46511	0.0552	0.005	0.274	|	-2.26529	0.00397	0.0191	0.482	|	0	26	0	3	24	0.125	0	19	0	1	22	0.0454545	2	27	0.0740741	1	20	0.05	|	0	19	0	1	16	0.0625
chr1	105683356	+	A	chr1:105683356	2310035C23Rik	SINE	Intron	non_coding_transcript_variant	0	0	-	-	-	-	-0.280168	0.476	0.578	0.354	|	-0.513009	0.173	0.247	0.171	|	9	16	0.5625	8	14	0.571429	9	15	0.6	9	19	0.473684	9	25	0.36	12	19	0.631579	|	4	13	0.307692	5	18	0.277778
chr1	105700927	+	A	chr1:105700927	2310035C23Rik	SINE	Intron	non_coding_transcript_variant	0	0	105698776	2151	upstream	intronic	-6.08001	0.001	0.0676	0.00125	|	-1.65526	0.00464	0.0146	0.613	|	1	19	0.0526316	1	15	0.0666667	3	34	0.0882353	0	23	0	0	14	0	0	12	0	|	1	8	0.125	0	5	0
chr1	105732828	+	A	chr1:105732828	2310035C23Rik	.	Intron	non_coding_transcript_variant	0	0	105733419	591	downstream	intronic	-3.77475	0.001	0.0137	0.186	|	-5.47185	0.001	0.0444	0.0128	|	0	19	0	2	30	0.0666667	1	26	0.0384615	0	27	0	0	26	0	0	21	0	|	1	26	0.0384615	2	20	0.1
chr1	105733415	+	A	chr1:105733415	2310035C23Rik	LTR	Intron	non_coding_transcript_variant	0	0	105732832	583	upstream	intronic	1.57739	0.0094	0.00315	0.534	|	-1.78901	0.00338	0.0117	0.52	|	0	29	0	1	32	0.03125	0	41	0	0	43	0	1	43	0.0232558	1	28	0.0357143	|	2	28	0.0714286	0	18	0
chr1	105733416	+	A	chr1:105733416	2310035C23Rik	LTR	Intron	non_coding_transcript_variant	0	0	105732831	585	upstream	intronic	-0.161809	0.00288	0.00322	0.947	|	-1.52969	0.00401	0.0116	0.598	|	1	30	0.0333333	0	32	0	0	41	0	0	43	0	1	42	0.0238095	0	28	0	|	1	28	0.0357143	0	18	0
chr1	105733417	+	A	chr1:105733417	2310035C23Rik	LTR	Intron	non_coding_transcript_variant	0	0	105732830	587	upstream	intronic	0.0215901	0.0119	0.0118	0.994	|	-2.19635	0.00318	0.0146	0.441	|	2	30	0.0666667	0	32	0	1	41	0.0243902	0	43	0	2	42	0.047619	1	28	0.0357143	|	2	28	0.0714286	0	18	0
chr1	105733428	+	A	chr1:105733428	2310035C23Rik	LTR	Intron	non_coding_transcript_variant	0	0	105732821	607	upstream	intronic	-2.53783	0.0081	0.0471	0.232	|	0.217973	0.0137	0.0118	0.938	|	2	30	0.0666667	1	32	0.03125	2	40	0.05	1	47	0.0212766	1	40	0.025	0	26	0	|	1	28	0.0357143	0	12	0
chr1	105733429	+	A	chr1:105733429	2310035C23Rik	LTR	Intron	non_coding_transcript_variant	0	0	105732818	611	upstream	intronic	-0.116046	0.113	0.122	0.751	|	1.59499	0.119	0.0393	0.608	|	3	30	0.1	6	32	0.1875	4	41	0.097561	6	47	0.12766	4	41	0.097561	3	26	0.115385	|	8	30	0.266667	0	12	0
chr1	105733430	+	A	chr1:105733430	2310035C23Rik	LTR	Intron	non_coding_transcript_variant	0	0	105732818	612	upstream	intronic	1.57025	0.0493	0.0166	0.52	|	2.24639	0.108	0.0227	0.425	|	0	30	0	2	32	0.0625	3	41	0.0731707	3	47	0.0638298	2	41	0.0487805	1	26	0.0384615	|	4	31	0.129032	0	12	0
chr1	105733431	+	A	chr1:105733431	2310035C23Rik	LTR	Intron	non_coding_transcript_variant	0	0	105732817	614	upstream	intronic	-1.65212	0.00935	0.0294	0.418	|	1.18035	0.011	0.00484	0.702	|	1	30	0.0333333	1	32	0.03125	1	41	0.0243902	1	47	0.0212766	0	41	0	1	26	0.0384615	|	0	31	0	0	12	0
chr1	105740002	+	A	chr1:105740002	2310035C23Rik	SINE	Intron	NMD_transcript_variant	1	1	-	-	-	-	0.825978	0.314	0.177	0.153	|	0.44395	0.213	0.157	0.201	|	9	38	0.236842	6	27	0.222222	4	38	0.105263	10	30	0.333333	11	33	0.333333	5	18	0.277778	|	2	16	0.125	3	21	0.142857
chr1	105740029	+	A	chr1:105740029	2310035C23Rik	SINE	Intron	NMD_transcript_variant	1	1	-	-	-	-	-1.06568	0.0643	0.135	0.288	|	-1.2093	0.0204	0.0473	0.636	|	7	41	0.170732	3	20	0.15	4	42	0.0952381	1	40	0.025	7	47	0.148936	2	28	0.0714286	|	1	26	0.0384615	1	21	0.047619
chr1	105740043	+	A	chr1:105740043	2310035C23Rik	SINE	Intron	NMD_transcript_variant	0	0	-	-	-	-	0.448216	0.229	0.168	0.395	|	-0.646595	0.126	0.197	0.529	|	7	36	0.194444	5	20	0.25	4	41	0.097561	12	41	0.292683	10	45	0.222222	5	27	0.185185	|	7	27	0.259259	6	18	0.333333
chr1	105740063	+	A	chr1:105740063	2310035C23Rik	SINE	Intron	NMD_transcript_variant	1	1	-	-	-	-	1.5118	0.0668	0.0234	0.577	|	-3.88926	0.00357	0.0529	0.159	|	0	34	0	3	20	0.15	3	35	0.0857143	2	36	0.0555556	3	43	0.0697674	2	26	0.0769231	|	2	23	0.0869565	1	14	0.0714286
chr1	118333741	+	A	chr1:118333741	Nifk	SINE	UTR	3_prime_UTR_variant	0	0	-	-	-	-	-0.833633	0.00437	0.00778	0.766	|	1.9478	0.0169	0.00437	0.546	|	1	53	0.0188679	0	21	0	1	40	0.025	3	36	0.0833333	0	20	0	0	23	0	|	2	24	0.0833333	0	17	0
chr1	119770692	-	T	chr1:119770692	Ptpn4	LINE	Intron	NMD_transcript_variant	0	0	-	-	-	-	-2.81707	0.0227	0.16	0.34	|	-0.0929531	0.116	0.124	0.933	|	7	19	0.368421	6	27	0.222222	1	20	0.05	2	19	0.105263	2	18	0.111111	0	12	0	|	1	30	0.0333333	4	17	0.235294
chr1	119770747	-	T	chr1:119770747	Ptpn4	LINE	Intron	NMD_transcript_variant	0	0	119771464	717	upstream	intronic	-1.81258	0.00415	0.0146	0.555	|	0.0246669	0.00297	0.00292	0.992	|	1	17	0.0588235	1	19	0.0526316	0	14	0	0	19	0	1	14	0.0714286	0	6	0	|	0	25	0	0	21	0
chr1	119770758	-	T	chr1:119770758	Ptpn4	LINE	Intron	NMD_transcript_variant	0	0	119771453	695	upstream	intronic	-0.87028	0.0984	0.18	0.227	|	1.92801	0.0145	0.00382	0.523	|	3	17	0.176471	2	13	0.153846	3	14	0.214286	1	15	0.0666667	1	14	0.0714286	1	5	0.2	|	0	20	0	0	15	0
chr1	119771395	-	T	chr1:119771395	Ptpn4	LINE	Intron	NMD_transcript_variant	0	0	119770816	579	downstream	intronic	1.67938	0.0113	0.00352	0.541	|	3.58729	0.0338	0.00281	0.135	|	0	22	0	0	28	0	1	23	0.0434783	0	23	0	1	25	0.04	1	28	0.0357143	|	0	29	0	0	17	0
chr1	119771396	-	T	chr1:119771396	Ptpn4	LINE	Intron	NMD_transcript_variant	0	0	119770815	581	downstream	intronic	-0.0589593	0.00338	0.00352	0.982	|	-3.40739	0.00315	0.0334	0.17	|	0	23	0	0	28	0	1	23	0.0434783	0	23	0	1	26	0.0384615	0	28	0	|	1	30	0.0333333	1	19	0.0526316
chr1	119771421	-	T	chr1:119771421	Ptpn4	LINE	Intron	NMD_transcript_variant	0	0	119770790	631	downstream	intronic	1.67127	0.0145	0.00457	0.6	|	-0.050367	0.00979	0.0101	0.984	|	0	19	0	0	23	0	2	21	0.0952381	0	23	0	1	25	0.04	2	26	0.0769231	|	2	32	0.0625	0	19	0
chr1	119771448	-	T	chr1:119771448	Ptpn4	LINE	Intron	NMD_transcript_variant	0	0	119770763	685	downstream	intronic	-0.300155	0.00329	0.00405	0.915	|	1.46363	0.0112	0.00405	0.615	|	0	13	0	0	20	0	1	15	0.0666667	0	19	0	1	28	0.0357143	0	20	0	|	2	30	0.0666667	0	24	0
chr1	119771458	-	T	chr1:119771458	Ptpn4	LINE	Intron	NMD_transcript_variant	0	0	119770753	705	downstream	intronic	1.81407	0.00352	0.001	0.423	|	0.803531	0.0145	0.00833	0.762	|	0	13	0	0	18	0	0	13	0	0	16	0	0	26	0	1	23	0.0434783	|	1	32	0.03125	0	23	0
chr1	119771461	-	T	chr1:119771461	Ptpn4	LINE	Intron	NMD_transcript_variant	0	0	119770750	711	downstream	intronic	0	0.001	0.001	---	|	-2.13073	0.0106	0.0462	0.337	|	0	14	0	0	18	0	0	15	0	0	16	0	0	26	0	0	23	0	|	2	32	0.0625	1	23	0.0434783
chr1	119771463	-	T	chr1:119771463	Ptpn4	LINE	Intron	NMD_transcript_variant	0	0	119770748	715	downstream	intronic	-0.0876781	0.00382	0.00405	0.976	|	1.12038	0.0343	0.0158	0.636	|	0	15	0	0	17	0	1	15	0.0666667	0	16	0	0	24	0	1	18	0.0555556	|	3	30	0.1	0	23	0
chr1	119771466	-	T	chr1:119771466	Ptpn4	LINE	Intron	NMD_transcript_variant	0	0	119770745	721	downstream	intronic	1.79361	0.00347	0.001	0.423	|	-0.285069	0.00902	0.011	0.912	|	0	15	0	0	16	0	0	15	0	0	16	0	1	24	0.0416667	0	18	0	|	2	29	0.0689655	0	23	0
chr1	119773756	-	T	chr1:119773756	Ptpn4	.	Intron	NMD_transcript_variant	0	0	-	-	-	-	0.683542	0.00523	0.00325	0.828	|	-0.864787	0.00933	0.017	0.768	|	0	24	0	0	23	0	1	29	0.0344828	2	14	0.142857	0	17	0	0	25	0	|	3	17	0.176471	0	15	0
chr1	119773823	-	T	chr1:119773823	Ptpn4	.	Intron	NMD_transcript_variant	1	1	119775430	1607	upstream	intronic	0	0.001	0.001	---	|	4.17633	0.079	0.00437	0.179	|	0	42	0	0	28	0	0	42	0	0	33	0	0	30	0	0	35	0	|	2	24	0.0833333	0	22	0
chr1	119773849	-	T	chr1:119773849	Ptpn4	.	Intron	NMD_transcript_variant	0	0	119775404	1555	upstream	intronic	1.42178	0.0107	0.00401	0.619	|	-1.75051	0.00347	0.0117	0.526	|	2	31	0.0645161	0	17	0	0	28	0	1	31	0.0322581	0	25	0	1	26	0.0384615	|	1	21	0.047619	0	16	0
chr1	119775358	-	T	chr1:119775358	Ptpn4	.	Intron	NMD_transcript_variant	0	0	119773895	1463	downstream	intronic	-4.39001	0.001	0.021	0.184	|	2.32193	0.0167	0.00333	0.44	|	0	28	0	3	31	0.0967742	2	21	0.0952381	0	13	0	0	21	0	0	26	0	|	0	22	0	0	12	0
chr1	119775361	-	T	chr1:119775361	Ptpn4	.	Intron	NMD_transcript_variant	0	0	-	-	-	-	-3.99246	0.001	0.0159	0.188	|	0.076871	0.0164	0.0156	0.98	|	0	28	0	3	31	0.0967742	1	24	0.0416667	0	13	0	0	21	0	0	25	0	|	1	22	0.0454545	1	12	0.0833333
chr1	119775405	-	T	chr1:119775405	Ptpn4	.	Intron	NMD_transcript_variant	0	0	119773848	1557	downstream	intronic	-2.6432	0.00397	0.0248	0.44	|	-1.64929	0.00385	0.0121	0.568	|	0	25	0	2	25	0.08	4	21	0.190476	0	15	0	1	16	0.0625	0	21	0	|	1	21	0.047619	0	16	0
chr1	119775412	-	T	chr1:119775412	Ptpn4	.	Intron	NMD_transcript_variant	0	0	119773841	1571	downstream	intronic	-4.07244	0.001	0.0168	0.187	|	1.97045	0.0614	0.0157	0.433	|	0	21	0	1	21	0.047619	2	20	0.1	0	16	0	0	18	0	0	19	0	|	2	20	0.1	0	12	0
chr1	119776080	-	T	chr1:119776080	Ptpn4	SINE	Intron	NMD_transcript_variant	0	0	-	-	-	-	-1.25211	0.0045	0.0107	0.676	|	-1.95944	0.001	0.00389	0.423	|	2	44	0.0454545	0	28	0	1	37	0.027027	0	54	0	2	22	0.0909091	0	26	0	|	0	28	0	0	21	0
chr1	123845508	-	T	chr1:123845508	Dpp10	SINE	Intron	non_coding_transcript_variant	0	0	-	-	-	-	0.123078	0.00347	0.00318	0.962	|	-2.46027	0.001	0.0055	0.423	|	0	17	0	1	31	0.0322581	0	22	0	0	26	0	0	28	0	1	24	0.0416667	|	1	6	0.166667	0	9	0
chr1	123853352	-	T	chr1:123853352	Dpp10	SINE	Intron	non_coding_transcript_variant	0	0	-	-	-	-	-3.68114	0.00318	0.0408	0.155	|	4.17406	0.0181	0.001	0.187	|	1	24	0.0416667	1	18	0.0555556	1	34	0.0294118	1	31	0.0322581	0	26	0	0	17	0	|	0	11	0	0	10	0
chr1	124233156	-	T	chr1:124233156	-	SINE	intergenic	intergenic_variant	0	0	-	-	-	-	-2.65526	0.001	0.0063	0.423	|	4.14657	0.0177	0.001	0.187	|	0	12	0	0	12	0	3	12	0.25	0	14	0	0	15	0	0	12	0	|	0	14	0	0	6	0
chr1	124326824	-	T	chr1:124326824	-	LTR	intergenic	intergenic_variant	0	0	-	-	-	-	4.71788	0.171	0.00651	0.222	|	0.157168	0.0359	0.0322	0.969	|	0	10	0	0	9	0	8	29	0.275862	5	27	0.185185	2	17	0.117647	3	13	0.230769	|	2	6	0.333333	0	5	0
chr1	124481772	-	T	chr1:124481772	-	LINE	intergenic	intergenic_variant	0	0	-	-	-	-	-4.1308	0.001	0.0175	0.184	|	2.29277	0.0049	0.001	0.423	|	1	12	0.0833333	0	26	0	2	31	0.0645161	0	24	0	0	23	0	0	19	0	|	0	7	0	0	9	0
chr1	124501994	-	T	chr1:124501994	Gm28928	LINE	intergenic	downstream_gene_variant	0	0	-	-	-	-	-1.16777	0.0656	0.147	0.167	|	4.52175	0.023	0.001	0.184	|	4	22	0.181818	4	29	0.137931	6	47	0.12766	1	33	0.030303	3	28	0.107143	2	23	0.0869565	|	0	11	0	0	8	0
chr1	124502026	-	T	chr1:124502026	Gm28928	LINE	intergenic	downstream_gene_variant	0	0	-	-	-	-	-3.44887	0.001	0.0109	0.184	|	0.0384924	0.00437	0.00425	0.99	|	1	24	0.0416667	1	32	0.03125	0	48	0	0	32	0	0	28	0	0	23	0	|	0	10	0	1	13	0.0769231
chr1	124570881	-	T	chr1:124570881	Gm28928	LINE	Intron	non_coding_transcript_variant	0	0	124571989	1108	upstream	intronic	0	0.001	0.001	---	|	4.56758	0.0237	0.001	0.189	|	0	10	0	0	17	0	0	25	0	0	14	0	0	15	0	0	10	0	|	0	5	0	0	5	0
chr1	124570889	-	T	chr1:124570889	Gm28928	LINE	Intron	non_coding_transcript_variant	0	0	-	-	-	-	-0.273143	0.00405	0.0049	0.933	|	1.91232	0.0207	0.0055	0.594	|	0	10	0	2	17	0.117647	0	26	0	0	14	0	1	15	0.0666667	0	10	0	|	1	6	0.166667	0	5	0
chr1	124570897	-	T	chr1:124570897	Gm28928	LINE	Intron	non_coding_transcript_variant	0	0	-	-	-	-	-2.26529	0.001	0.00481	0.423	|	-2.38614	0.001	0.00523	0.423	|	0	9	0	2	18	0.111111	0	29	0	0	14	0	0	16	0	0	10	0	|	1	7	0.142857	0	5	0
chr1	124581531	-	T	chr1:124581531	Gm28928	LINE	Intron	non_coding_transcript_variant	0	0	-	-	-	-	-1.71948	0.001	0.00329	0.423	|	-2.12694	0.001	0.00437	0.423	|	0	12	0	0	14	0	1	28	0.0357143	0	12	0	0	19	0	0	12	0	|	1	12	0.0833333	0	12	0
chr1	124602644	-	T	chr1:124602644	Gm28928	LINE	Intron	non_coding_transcript_variant	0	0	-	-	-	-	1.81407	0.00352	0.001	0.423	|	-2.01963	0.001	0.00405	0.423	|	0	15	0	0	25	0	0	26	0	1	23	0.0434783	0	32	0	0	9	0	|	0	11	0	0	15	0
chr1	124633554	-	T	chr1:124633554	Gm28928	LINE	Intron	non_coding_transcript_variant	0	0	-	-	-	-	-0.0331786	0.00511	0.00523	0.993	|	0.255178	0.00464	0.00389	0.935	|	2	14	0.142857	0	5	0	0	7	0	0	11	0	2	15	0.133333	0	7	0	|	0	6	0	0	5	0
chr1	124633557	-	T	chr1:124633557	Gm28928	LINE	Intron	non_coding_transcript_variant	0	0	-	-	-	-	2.32193	0.0203	0.00405	0.479	|	2.60814	0.0237	0.00389	0.436	|	1	15	0.0666667	0	5	0	0	6	0	0	11	0	1	15	0.0666667	1	8	0.125	|	0	6	0	0	6	0
chr1	124633558	-	T	chr1:124633558	Gm28928	LINE	Intron	non_coding_transcript_variant	0	0	-	-	-	-	2.16878	0.023	0.00511	0.543	|	-4.75305	0.001	0.027	0.184	|	2	15	0.133333	0	5	0	0	6	0	1	11	0.0909091	2	15	0.133333	0	8	0	|	1	6	0.166667	0	6	0
chr1	124633567	-	T	chr1:124633567	Gm28928	LINE	Intron	non_coding_transcript_variant	0	0	-	-	-	-	0.433187	0.00536	0.00397	0.897	|	-2.14741	0.001	0.00443	0.423	|	1	16	0.0625	0	5	0	0	8	0	0	14	0	2	13	0.153846	0	8	0	|	0	7	0	0	7	0
chr1	124633573	-	T	chr1:124633573	Gm28928	LINE	Intron	non_coding_transcript_variant	0	0	-	-	-	-	0.0998534	0.00536	0.005	0.978	|	-0.149153	0.00464	0.00515	0.965	|	2	16	0.125	0	5	0	0	8	0	0	14	0	2	13	0.153846	0	8	0	|	0	7	0	0	7	0
chr1	124633576	-	T	chr1:124633576	Gm28928	LINE	Intron	non_coding_transcript_variant	0	0	124635899	2323	upstream	intronic	-0.516146	0.0204	0.0292	0.886	|	-2.00906	0.00575	0.0232	0.595	|	1	16	0.0625	2	5	0.4	0	9	0	0	14	0	1	13	0.0769231	1	9	0.111111	|	0	7	0	2	7	0.285714
chr1	124633580	-	T	chr1:124633580	Gm28928	LINE	Intron	non_coding_transcript_variant	0	0	124635896	2316	upstream	intronic	1.25997	0.0176	0.00737	0.742	|	-1.81407	0.001	0.00352	0.423	|	0	16	0	2	5	0.4	0	10	0	1	14	0.0714286	1	13	0.0769231	0	9	0	|	0	7	0	0	7	0
chr1	124633587	-	T	chr1:124633587	Gm28928	LINE	Intron	non_coding_transcript_variant	0	0	124635890	2303	upstream	intronic	4.3834	0.0209	0.001	0.184	|	-7.3437	0.001	0.162	0.00307	|	0	15	0	0	5	0	0	10	0	0	13	0	1	11	0.0909091	1	10	0.1	|	1	8	0.125	2	7	0.285714
chr1	124710263	-	T	chr1:124710263	Gm28928	LTR	Intron	non_coding_transcript_variant	0	0	-	-	-	-	-3.69956	0.001	0.013	0.184	|	0.241455	0.00443	0.00375	0.937	|	1	19	0.0526316	1	24	0.0416667	0	23	0	0	30	0	0	18	0	0	12	0	|	0	10	0	0	14	0
chr1	124761790	-	T	chr1:124761790	Gm28928	LINE	Intron	non_coding_transcript_variant	0	0	124759724	2066	downstream	intronic	-0.194988	0.00437	0.005	0.954	|	0	0.001	0.001	---	|	0	13	0	2	16	0.125	0	17	0	0	20	0	1	12	0.0833333	0	12	0	|	0	6	0	0	5	0
chr1	124762938	-	T	chr1:124762938	Gm28928	SINE	Intron	non_coding_transcript_variant	0	0	-	-	-	-	-1.09579	0.0122	0.0261	0.735	|	3.9341	0.0153	0.001	0.184	|	1	13	0.0769231	3	13	0.230769	0	35	0	1	22	0.0454545	1	25	0.04	0	16	0	|	0	11	0	0	7	0
chr1	124762941	-	T	chr1:124762941	Gm28928	SINE	Intron	non_coding_transcript_variant	0	0	-	-	-	-	1.68174	0.128	0.04	0.601	|	0	0.001	0.001	---	|	0	14	0	6	13	0.461538	5	36	0.138889	6	23	0.26087	2	29	0.0689655	2	17	0.117647	|	0	11	0	0	7	0
chr1	124762953	-	T	chr1:124762953	Gm28928	SINE	Intron	non_coding_transcript_variant	0	0	-	-	-	-	-1.61217	0.00511	0.0156	0.635	|	-0.449308	0.00415	0.00567	0.897	|	0	12	0	2	15	0.133333	1	35	0.0285714	0	21	0	0	25	0	2	15	0.133333	|	2	11	0.181818	0	7	0
chr1	124762971	-	T	chr1:124762971	Gm28928	SINE	Intron	non_coding_transcript_variant	0	0	124763728	757	upstream	intronic	-2.41381	0.00352	0.0187	0.436	|	3.74603	0.0134	0.001	0.184	|	1	12	0.0833333	0	13	0	3	38	0.0789474	0	23	0	1	23	0.0434783	0	9	0	|	0	11	0	0	7	0
chr1	124762984	-	T	chr1:124762984	Gm28928	SINE	Intron	non_coding_transcript_variant	0	0	-	-	-	-	0.277997	0.00558	0.0046	0.937	|	-1.28267	0.0126	0.0306	0.7	|	0	12	0	0	12	0	4	41	0.097561	0	23	0	4	23	0.173913	0	8	0	|	2	10	0.2	1	7	0.142857
chr1	124762992	-	T	chr1:124762992	Gm28928	SINE	Intron	non_coding_transcript_variant	0	0	-	-	-	-	3.60768	0.0122	0.001	0.184	|	2.0703	0.0042	0.001	0.423	|	0	13	0	0	12	0	0	40	0	1	24	0.0416667	1	23	0.0434783	0	7	0	|	0	10	0	0	7	0
chr1	124762997	-	T	chr1:124762997	Gm28928	SINE	Intron	non_coding_transcript_variant	0	0	-	-	-	-	2.00746	0.0119	0.00295	0.445	|	1.72911	0.0182	0.0055	0.623	|	0	14	0	0	11	0	1	39	0.025641	1	25	0.04	1	24	0.0416667	0	8	0	|	0	11	0	0	8	0
chr1	124766383	-	T	chr1:124766383	Gm28928	SINE	Intron	non_coding_transcript_variant	0	0	-	-	-	-	0.0440649	0.337	0.327	0.925	|	0.496034	0.0296	0.021	0.888	|	3	12	0.25	10	30	0.333333	13	31	0.419355	13	24	0.541667	4	18	0.222222	7	22	0.318182	|	1	9	0.111111	0	11	0
chr1	124836259	-	T	chr1:124836259	Gm28928	SINE	Intron	non_coding_transcript_variant	0	0	-	-	-	-	-1.40363	0.00531	0.0141	0.673	|	2.42178	0.00536	0.001	0.423	|	0	11	0	1	15	0.0666667	1	24	0.0416667	3	20	0.15	0	20	0	0	21	0	|	0	8	0	0	14	0
chr1	124842703	-	T	chr1:124842703	Gm28928	SINE	Intron	non_coding_transcript_variant	0	0	-	-	-	-	1.58644	0.0101	0.00338	0.549	|	0.578989	0.00693	0.00464	0.879	|	0	32	0	1	26	0.0384615	0	24	0	1	32	0.03125	1	30	0.0333333	0	22	0	|	2	20	0.1	0	11	0
chr1	127794072	+	A	chr1:127794072	Ccnt2	SINE	Intron	non_coding_transcript_exon_variant	0	0	-	-	-	-	0.0941332	0.003	0.00281	0.968	|	-1.90595	0.001	0.00375	0.423	|	0	45	0	0	21	0	1	45	0.0222222	0	35	0	1	37	0.027027	0	23	0	|	0	22	0	1	19	0.0526316
chr1	127794074	+	A	chr1:127794074	Ccnt2	SINE	Intron	non_coding_transcript_exon_variant	0	0	-	-	-	-	0.0941332	0.003	0.00281	0.968	|	0	0.00318	0.00318	1	|	0	43	0	0	21	0	1	45	0.0222222	0	35	0	1	37	0.027027	0	21	0	|	0	22	0	0	20	0
chr1	127794092	+	A	chr1:127794092	Ccnt2	SINE	Intron	non_coding_transcript_exon_variant	0	0	-	-	-	-	-1.9355	0.00309	0.0118	0.477	|	-1.92436	0.017	0.0646	0.469	|	0	52	0	2	27	0.0740741	1	45	0.0222222	0	35	0	1	34	0.0294118	0	21	0	|	5	23	0.217391	1	23	0.0434783
chr1	127921270	+	A	chr1:127921270	Rab3gap1	SINE	Intron	intron_variant	0	0	127922025	755	downstream	intronic	-0.790419	0.0161	0.0279	0.814	|	-2.86774	0.001	0.0073	0.423	|	0	22	0	2	12	0.166667	3	23	0.130435	0	22	0	1	17	0.0588235	1	14	0.0714286	|	0	12	0	0	9	0
chr1	127921271	+	A	chr1:127921271	Rab3gap1	SINE	Intron	intron_variant	0	0	127922024	753	downstream	intronic	4.67892	0.132	0.00515	0.178	|	-0.0384924	0.00536	0.0055	0.992	|	3	22	0.136364	0	12	0	0	23	0	1	22	0.0454545	3	17	0.176471	4	14	0.285714	|	0	12	0	0	10	0
chr1	127921281	+	A	chr1:127921281	Rab3gap1	SINE	Intron	intron_variant	0	0	127922014	733	downstream	intronic	3.45075	0.0555	0.00507	0.278	|	0.252025	0.0246	0.0206	0.941	|	0	22	0	0	12	0	3	23	0.130435	1	23	0.0434783	1	17	0.0588235	1	15	0.0666667	|	1	12	0.0833333	0	9	0
chr1	127943591	+	A	chr1:127943591	Rab3gap1	Simple	UTR	3_prime_UTR_variant	0	0	127943595	4	downstream	UTR	-0.273559	0.00849	0.0103	0.911	|	0.456535	0.0126	0.00918	0.86	|	1	42	0.0238095	0	44	0	2	44	0.0454545	1	32	0.03125	1	51	0.0196078	0	34	0	|	1	34	0.0294118	0	40	0
chr1	128176521	+	A	chr1:128176521	R3hdm1	.	Intron	non_coding_transcript_exon_variant	0	0	-	-	-	-	-3.40203	0.0298	0.315	0.302	|	-0.341484	0.136	0.172	0.633	|	3	9	0.333333	6	16	0.375	4	16	0.25	1	9	0.111111	0	8	0	5	21	0.238095	|	4	13	0.307692	1	6	0.166667
chr1	128176524	+	A	chr1:128176524	R3hdm1	.	Intron	non_coding_transcript_exon_variant	0	0	-	-	-	-	1.90595	0.00375	0.001	0.423	|	-2.21462	0.001	0.00464	0.423	|	0	7	0	0	16	0	0	14	0	0	9	0	0	7	0	1	19	0.0526316	|	0	12	0	0	6	0
chr1	128176995	+	A	chr1:128176995	R3hdm1	.	Intron	non_coding_transcript_exon_variant	0	0	128177719	724	downstream	intronic	-2.38614	0.001	0.00523	0.423	|	-2.12694	0.001	0.00437	0.423	|	0	24	0	0	10	0	2	14	0.142857	0	12	0	0	13	0	0	10	0	|	1	12	0.0833333	0	9	0
chr1	128177030	+	A	chr1:128177030	R3hdm1	.	Intron	non_coding_transcript_exon_variant	0	0	-	-	-	-	-0.0566417	0.0055	0.00572	0.988	|	2.76612	0.0265	0.00389	0.421	|	0	20	0	0	9	0	3	16	0.1875	2	12	0.166667	0	18	0	0	8	0	|	0	16	0	0	12	0
chr1	128190071	+	A	chr1:128190071	R3hdm1	SINE	Intron	intron_variant	1	1	-	-	-	-	3.31241	0.0331	0.00333	0.191	|	1.99456	0.0473	0.0119	0.38	|	0	36	0	0	19	0	1	27	0.037037	1	36	0.0277778	1	45	0.0222222	2	34	0.0588235	|	1	23	0.0434783	0	12	0
chr1	128190078	+	A	chr1:128190078	R3hdm1	SINE	Intron	intron_variant	1	1	-	-	-	-	0.256398	0.0837	0.0701	0.592	|	4.64697	0.0881	0.00352	0.122	|	2	34	0.0588235	1	19	0.0526316	3	27	0.111111	3	35	0.0857143	5	43	0.116279	2	34	0.0588235	|	1	23	0.0434783	0	12	0
chr1	128192180	+	A	chr1:128192180	R3hdm1	SINE	Intron	intron_variant	0	0	-	-	-	-	-2.21792	0.013	0.0604	0.368	|	-4.30184	0.001	0.0197	0.193	|	2	34	0.0588235	1	36	0.0277778	5	37	0.135135	1	38	0.0263158	2	24	0.0833333	0	26	0	|	3	17	0.176471	0	9	0
chr1	128192181	+	A	chr1:128192181	R3hdm1	SINE	Intron	intron_variant	1	1	128191590	591	upstream	intronic	-0.0143113	0.0183	0.0185	0.996	|	-0.273143	0.00405	0.0049	0.933	|	2	34	0.0588235	0	36	0	4	37	0.108108	0	38	0	2	24	0.0833333	2	27	0.0740741	|	2	17	0.117647	0	9	0
chr1	128192189	+	A	chr1:128192189	R3hdm1	SINE	Intron	intron_variant	1	1	128191581	608	upstream	intronic	-2.31334	0.0194	0.0962	0.393	|	-0.606476	0.00322	0.0049	0.843	|	2	34	0.0588235	3	34	0.0882353	6	35	0.171429	3	36	0.0833333	2	23	0.0869565	0	27	0	|	2	17	0.117647	0	9	0
chr1	128192200	+	A	chr1:128192200	R3hdm1	SINE	Intron	intron_variant	0	0	128191571	629	upstream	intronic	1.6535	0.00971	0.00309	0.514	|	1.51969	0.0135	0.00472	0.634	|	1	34	0.0294118	0	34	0	0	42	0	1	39	0.025641	0	27	0	1	28	0.0357143	|	2	19	0.105263	0	9	0
chr1	128192215	+	A	chr1:128192215	R3hdm1	SINE	Intron	intron_variant	1	1	128191555	660	upstream	intronic	-0.257408	0.0544	0.065	0.77	|	-1.80313	0.00389	0.0136	0.543	|	4	35	0.114286	1	37	0.027027	4	45	0.0888889	2	39	0.0512821	1	33	0.030303	3	29	0.103448	|	1	20	0.05	0	8	0
chr1	128192222	+	A	chr1:128192222	R3hdm1	SINE	Intron	intron_variant	1	1	128191549	673	upstream	intronic	1.71654	0.01	0.00306	0.5	|	0.200346	0.0161	0.014	0.946	|	1	35	0.0285714	0	41	0	0	48	0	0	40	0	1	34	0.0294118	1	29	0.0344828	|	1	19	0.0526316	0	8	0
chr1	128192236	+	A	chr1:128192236	R3hdm1	SINE	Intron	intron_variant	0	0	-	-	-	-	-1.72343	0.00347	0.0114	0.536	|	-2.31744	0.00368	0.0184	0.459	|	2	31	0.0645161	0	35	0	1	43	0.0232558	0	42	0	0	33	0	1	24	0.0416667	|	2	19	0.105263	0	7	0
chr1	128254440	+	A	chr1:128254440	Ubxn4	SINE	Intron	intron_variant	0	0	128256297	1857	downstream	intronic	0	0.001	0.001	---	|	4.50739	0.0227	0.001	0.19	|	0	13	0	0	5	0	0	7	0	0	11	0	0	7	0	0	8	0	|	0	7	0	0	6	0
chr1	128254606	+	A	chr1:128254606	Ubxn4	SINE	Intron	intron_variant	0	0	-	-	-	-	-2.32193	0.001	0.005	0.423	|	-1.87072	0.00481	0.0176	0.575	|	0	9	0	0	6	0	1	8	0.125	0	8	0	0	6	0	0	6	0	|	1	16	0.0625	0	7	0
chr1	128254620	+	A	chr1:128254620	Ubxn4	SINE	Intron	intron_variant	0	0	128255642	1022	downstream	intronic	-2.21462	0.001	0.00464	0.423	|	0.119965	0.0292	0.0269	0.974	|	0	8	0	0	5	0	1	10	0.1	0	8	0	0	8	0	0	6	0	|	0	18	0	1	7	0.142857
chr1	128273311	+	A	chr1:128273311	Ubxn4	SINE	Intron	intron_variant	1	1	-	-	-	-	2.04447	0.0669	0.0162	0.42	|	-0.386233	0.00397	0.00519	0.907	|	1	18	0.0555556	0	14	0	2	26	0.0769231	1	25	0.04	3	20	0.15	1	20	0.05	|	0	19	0	0	23	0
chr1	128273330	+	A	chr1:128273330	Ubxn4	SINE	Intron	intron_variant	1	1	-	-	-	-	0.0370104	0.0194	0.0189	0.991	|	-3.33856	0.001	0.0101	0.189	|	4	27	0.148148	1	22	0.0454545	0	28	0	0	22	0	4	25	0.16	1	22	0.0454545	|	1	21	0.047619	0	25	0
chr1	128273344	+	A	chr1:128273344	Ubxn4	SINE	Intron	intron_variant	1	1	-	-	-	-	-1.27277	0.0199	0.0482	0.616	|	-5.56835	0.001	0.0475	0.017	|	2	29	0.0689655	1	22	0.0454545	1	28	0.0357143	0	25	0	2	24	0.0833333	2	21	0.0952381	|	1	26	0.0384615	3	24	0.125
chr1	128273694	+	A	chr1:128273694	Ubxn4	SINE	Intron	intron_variant	0	0	128274207	513	downstream	intronic	-2.26529	0.001	0.00481	0.423	|	-2.08845	0.001	0.00425	0.423	|	0	13	0	1	9	0.111111	0	16	0	0	24	0	0	9	0	0	5	0	|	1	13	0.0769231	0	5	0
chr1	128273904	+	A	chr1:128273904	Ubxn4	SINE	Intron	intron_variant	1	1	-	-	-	-	0.180702	0.209	0.185	0.841	|	1.69008	0.0791	0.0245	0.541	|	3	38	0.0789474	5	26	0.192308	12	29	0.413793	15	50	0.3	4	37	0.108108	11	39	0.282051	|	3	30	0.1	0	10	0
chr1	128273907	+	A	chr1:128273907	Ubxn4	SINE	Intron	intron_variant	1	1	-	-	-	-	5.79092	0.0554	0.001	0.0079	|	-1.99048	0.00315	0.0125	0.467	|	0	38	0	0	26	0	0	28	0	4	49	0.0816327	1	37	0.027027	3	39	0.0769231	|	1	30	0.0333333	0	10	0
chr1	128274557	+	A	chr1:128274557	Ubxn4	SINE	Intron	intron_variant	0	0	128272931	1626	upstream	exonic	-0.157427	0.0166	0.0185	0.96	|	1.98859	0.00397	0.001	0.423	|	0	25	0	2	35	0.0571429	3	27	0.111111	0	24	0	2	19	0.105263	1	23	0.0434783	|	0	16	0	0	22	0
chr1	131475281	-	T	chr1:131475281	Srgap2	SINE	Intron	non_coding_transcript_variant	0	0	-	-	-	-	4.07704	0.0169	0.001	0.191	|	-0.421011	0.00437	0.00585	0.905	|	0	24	0	0	7	0	0	31	0	1	26	0.0384615	1	8	0.125	0	12	0	|	2	10	0.2	0	5	0
chr1	131475336	-	T	chr1:131475336	Srgap2	SINE	Intron	non_coding_transcript_variant	0	0	-	-	-	-	2.10731	0.00431	0.001	0.423	|	-0.282666	0.00481	0.00585	0.938	|	0	18	0	0	8	0	0	29	0	2	25	0.08	0	10	0	0	16	0	|	2	10	0.2	0	6	0
chr1	131475339	-	T	chr1:131475339	Srgap2	SINE	Intron	non_coding_transcript_variant	0	0	-	-	-	-	1.77398	0.00342	0.001	0.423	|	4.3181	0.117	0.00585	0.232	|	0	17	0	0	8	0	0	29	0	1	25	0.04	0	10	0	0	16	0	|	2	10	0.2	0	6	0
chr1	131475340	-	T	chr1:131475340	Srgap2	SINE	Intron	non_coding_transcript_variant	0	0	-	-	-	-	1.95266	0.0159	0.0041	0.534	|	-0.333333	0.00464	0.00585	0.926	|	0	17	0	0	8	0	2	29	0.0689655	1	25	0.04	1	10	0.1	0	16	0	|	2	10	0.2	0	6	0
chr1	132202368	+	A	chr1:132202368	1700037F24Rik,Lemd1,Mir135b	.	Intron	non_coding_transcript_variant	0	0	-	-	-	-	6.54352	0.0933	0.001	0.00127	|	-0.501348	0.0117	0.0166	0.862	|	0	7	0	0	8	0	0	11	0	1	8	0.125	1	11	0.0909091	1	14	0.0714286	|	0	22	0	1	11	0.0909091
chr1	132663182	-	T	chr1:132663182	Nfasc	LTR	Intron	intron_variant	0	0	-	-	-	-	-2.08845	0.001	0.00425	0.423	|	0	0.001	0.001	---	|	1	13	0.0769231	0	16	0	0	23	0	0	13	0	0	12	0	0	15	0	|	0	10	0	0	6	0
chr1	132984052	-	T	chr1:132984052	Mdm4	SINE	Intron	intron_variant	0	0	-	-	-	-	2.16878	0.0045	0.001	0.423	|	3.03443	0.0368	0.0045	0.424	|	0	27	0	0	22	0	0	19	0	0	16	0	2	22	0.0909091	0	30	0	|	0	14	0	0	11	0
chr1	132985827	-	T	chr1:132985827	Mdm4	SINE	Intron	intron_variant	0	0	-	-	-	-	2.20611	0.0191	0.00415	0.501	|	0	0.001	0.001	---	|	0	18	0	1	14	0.0714286	0	12	0	1	19	0.0526316	2	15	0.133333	0	18	0	|	0	7	0	0	9	0
chr1	132985837	-	T	chr1:132985837	Mdm4	SINE	Intron	intron_variant	1	1	-	-	-	-	0.786168	0.167	0.0969	0.416	|	1.8536	0.0276	0.00763	0.654	|	2	13	0.153846	1	13	0.0769231	1	13	0.0769231	5	18	0.277778	4	14	0.285714	1	17	0.0588235	|	4	9	0.444444	0	9	0
chr1	133137534	+	A	chr1:133137534	Ppp1r15b	SINE	UTR	3_prime_UTR_variant	0	0	-	-	-	-	1.24353	0.0145	0.00612	0.628	|	-0.276008	0.00619	0.00749	0.9	|	2	94	0.0212766	0	62	0	1	93	0.0107527	0	71	0	5	98	0.0510204	5	84	0.0595238	|	0	56	0	1	24	0.0416667
chr1	133137536	+	A	chr1:133137536	Ppp1r15b	SINE	UTR	3_prime_UTR_variant	0	0	-	-	-	-	2.16262	0.0344	0.00768	0.278	|	-1.23766	0.00433	0.0102	0.671	|	2	96	0.0208333	0	62	0	2	92	0.0217391	3	71	0.0422535	4	99	0.040404	2	84	0.0238095	|	2	57	0.0350877	0	24	0
chr1	133137544	+	A	chr1:133137544	Ppp1r15b	SINE	UTR	3_prime_UTR_variant	1	1	-	-	-	-	-0.306461	0.0351	0.0434	0.749	|	0.39291	0.0115	0.00878	0.881	|	8	92	0.0869565	1	68	0.0147059	6	94	0.0638298	3	68	0.0441176	2	94	0.0212766	4	87	0.045977	|	2	58	0.0344828	0	27	0
chr1	133137561	+	A	chr1:133137561	Ppp1r15b	SINE	UTR	3_prime_UTR_variant	1	1	-	-	-	-	2.17235	0.0153	0.00339	0.458	|	0.677916	0.0122	0.00766	0.786	|	3	77	0.038961	0	58	0	0	79	0	4	59	0.0677966	0	71	0	3	57	0.0526316	|	1	55	0.0181818	0	26	0
chr1	133137570	+	A	chr1:133137570	Ppp1r15b	SINE	UTR	3_prime_UTR_variant	0	0	133137989	419	downstream	UTR	1.58394	0.026	0.00866	0.427	|	1.90627	0.0087	0.00232	0.401	|	3	77	0.038961	1	60	0.0166667	0	76	0	1	58	0.0172414	2	73	0.0273973	2	54	0.037037	|	0	54	0	0	26	0
chr1	133137983	+	A	chr1:133137983	Ppp1r15b	DNA	UTR	3_prime_UTR_variant	0	0	133137579	404	upstream	UTR	0.217575	0.157	0.135	0.654	|	1.07748	0.203	0.0963	0.314	|	13	61	0.213115	5	50	0.1	6	52	0.115385	13	65	0.2	16	86	0.186047	8	77	0.103896	|	7	50	0.14	6	30	0.2
chr1	133138010	+	A	chr1:133138010	Ppp1r15b	DNA	UTR	3_prime_UTR_variant	1	1	-	-	-	-	0.376261	0.16	0.123	0.301	|	0.537225	0.175	0.121	0.315	|	10	58	0.172414	5	49	0.102041	5	47	0.106383	12	71	0.169014	14	71	0.197183	7	57	0.122807	|	3	35	0.0857143	4	19	0.210526
chr1	133138018	+	A	chr1:133138018	Ppp1r15b	DNA	UTR	3_prime_UTR_variant	0	0	-	-	-	-	0.283129	0.118	0.097	0.364	|	-0.126876	0.132	0.144	0.758	|	4	56	0.0714286	6	47	0.12766	5	50	0.1	8	70	0.114286	8	63	0.126984	6	53	0.113208	|	4	33	0.121212	4	18	0.222222
chr1	134863299	-	T	chr1:134863299	Ppp1r12b	SINE	Intron	non_coding_transcript_variant	0	0	-	-	-	-	0	0.001	0.001	---	|	2.46027	0.0055	0.001	0.423	|	0	14	0	0	13	0	0	9	0	0	8	0	0	12	0	0	11	0	|	0	6	0	0	8	0
chr1	134863310	-	T	chr1:134863310	Ppp1r12b	SINE	Intron	non_coding_transcript_variant	0	0	-	-	-	-	-0.657329	0.0214	0.0338	0.855	|	0.171524	0.0344	0.0306	0.964	|	3	13	0.230769	0	14	0	2	12	0.166667	1	12	0.0833333	0	11	0	2	17	0.117647	|	0	5	0	2	10	0.2
chr1	135153604	+	A	chr1:135153604	Arl8a,Gm15445,Gm26280	LTR	Intron	non_coding_transcript_variant	0	0	-	-	-	-	-0.384284	0.118	0.154	0.271	|	-2.65881	0.0194	0.123	0.346	|	2	13	0.153846	2	17	0.117647	3	15	0.2	2	13	0.153846	2	21	0.0952381	1	9	0.111111	|	2	18	0.111111	1	20	0.05
chr1	136308435	-	T	chr1:136308435	Camsap2	LTR	Intron	intron_variant	0	0	-	-	-	-	4.65143	0.0251	0.001	0.184	|	-2.12694	0.001	0.00437	0.423	|	0	6	0	0	9	0	0	15	0	0	13	0	1	9	0.111111	1	7	0.142857	|	1	12	0.0833333	0	7	0
chr1	136310096	-	T	chr1:136310096	Camsap2	LTR	Intron	intron_variant	0	0	-	-	-	-	2.32193	0.0292	0.00585	0.547	|	0	0.001	0.001	---	|	0	5	0	2	10	0.2	0	13	0	1	5	0.2	1	8	0.125	0	7	0	|	0	5	0	0	7	0
chr1	136321029	-	T	chr1:136321029	Camsap2	SINE	Intron	intron_variant	0	0	136322100	1071	upstream	intronic	-0.251629	0.0042	0.005	0.939	|	4.41038	0.0213	0.001	0.185	|	2	16	0.125	0	11	0	0	13	0	0	20	0	2	27	0.0740741	0	8	0	|	0	9	0	0	5	0
chr1	136321053	-	T	chr1:136321053	Camsap2	SINE	Intron	intron_variant	0	0	136320023	1030	downstream	Intron	-4.70807	0.001	0.0261	0.184	|	-0.304179	0.00397	0.0049	0.925	|	2	14	0.142857	1	8	0.125	0	16	0	0	23	0	0	27	0	0	7	0	|	0	9	0	0	5	0
chr1	136321076	-	T	chr1:136321076	Camsap2	SINE	Intron	intron_variant	0	0	136322061	985	upstream	intronic	-0.440643	0.00431	0.00585	0.901	|	0	0.001	0.001	---	|	3	15	0.2	0	10	0	0	15	0	0	23	0	2	25	0.08	0	7	0	|	0	10	0	0	7	0
chr1	136321088	-	T	chr1:136321088	Camsap2	SINE	Intron	intron_variant	0	0	136322049	961	upstream	intronic	0.0223714	0.00457	0.0045	0.995	|	2.23929	0.00472	0.001	0.423	|	1	11	0.0909091	0	11	0	0	11	0	0	20	0	2	21	0.0952381	0	6	0	|	0	11	0	0	6	0
chr1	136321092	-	T	chr1:136321092	Camsap2	SINE	Intron	intron_variant	0	0	136322045	953	upstream	intronic	-0.513523	0.0283	0.0404	0.894	|	1.58863	0.148	0.0492	0.632	|	4	11	0.363636	0	10	0	2	11	0.181818	5	20	0.25	2	22	0.0909091	0	6	0	|	0	11	0	2	6	0.333333
chr1	136321095	-	T	chr1:136321095	Camsap2	SINE	Intron	intron_variant	0	0	136322042	947	upstream	intronic	-0.740797	0.322	0.538	0.44	|	-0.298751	0.613	0.754	0.387	|	7	10	0.7	5	10	0.5	4	9	0.444444	2	18	0.111111	11	22	0.5	3	5	0.6	|	6	11	0.545455	5	5	1
chr1	136322044	-	T	chr1:136322044	Camsap2	SINE	Intron	intron_variant	0	0	136321093	951	downstream	intronic	-0.672641	0.16	0.255	0.361	|	2.42326	0.305	0.0569	0.501	|	1	6	0.166667	2	5	0.4	3	12	0.25	1	9	0.111111	1	9	0.111111	3	9	0.333333	|	0	5	0	4	5	0.8
chr1	137946651	+	A	chr1:137946651	Gm26936,Gm37534,Gm4258	SINE	Intron	non_coding_transcript_variant	0	0	137945923	728	upstream	intronic	-0.440643	0.00249	0.00338	0.851	|	2.13645	0.0101	0.00229	0.368	|	0	45	0	0	45	0	3	78	0.0384615	0	54	0	1	65	0.0153846	0	54	0	|	0	74	0	0	43	0
chr1	138486875	-	T	chr1:138486875	Nek7	.	UTR	3_prime_UTR_variant	0	0	-	-	-	-	-0.724993	0.00919	0.0152	0.793	|	3.55213	0.0321	0.00273	0.127	|	0	36	0	2	19	0.105263	1	30	0.0333333	1	33	0.030303	1	39	0.025641	0	40	0	|	0	44	0	0	21	0
chr1	143676173	-	T	chr1:143676173	Cdc73	SINE	Intron	non_coding_transcript_variant	0	0	143676855	682	upstream	intronic	2.50212	0.00567	0.001	0.423	|	-1.98859	0.001	0.00397	0.423	|	0	8	0	0	7	0	0	7	0	0	13	0	0	13	0	2	11	0.181818	|	1	16	0.0625	0	5	0
chr1	143676184	-	T	chr1:143676184	Cdc73	SINE	Intron	non_coding_transcript_variant	0	0	143676852	668	upstream	intronic	2.08845	0.00425	0.001	0.423	|	1.93195	0.00382	0.001	0.423	|	0	8	0	0	9	0	0	11	0	1	13	0.0769231	0	13	0	0	13	0	|	0	18	0	0	5	0
chr1	143676185	-	T	chr1:143676185	Cdc73	SINE	Intron	non_coding_transcript_variant	0	0	143676852	667	upstream	intronic	0	0.001	0.001	---	|	2.23929	0.00472	0.001	0.423	|	0	8	0	0	9	0	0	11	0	0	12	0	0	13	0	0	13	0	|	0	18	0	0	5	0
chr1	143755364	-	T	chr1:143755364	Trove2	SINE	UTR	3_prime_UTR_variant	1	1	143755654	290	upstream	UTR	-1.06971	0.0375	0.0787	0.36	|	0.48457	0.0459	0.0328	0.304	|	6	113	0.0530973	8	89	0.0898876	10	98	0.102041	1	92	0.0108696	5	86	0.0581395	6	72	0.0833333	|	6	145	0.0413793	4	100	0.04
chr1	143755369	+	A	chr1:143755369	Trove2	SINE	UTR	3_prime_UTR_variant	0	0	143755651	282	downstream	UTR	-0.389968	0.0148	0.0193	0.864	|	0.511682	0.0307	0.0216	0.477	|	2	106	0.0188679	1	87	0.0114943	3	90	0.0333333	0	90	0	3	86	0.0348837	7	76	0.0921053	|	4	143	0.027972	1	102	0.00980392
chr1	143755371	-	T	chr1:143755371	Trove2	SINE	UTR	3_prime_UTR_variant	1	1	143755646	275	upstream	UTR	0.805703	0.0589	0.0337	0.437	|	0.403582	0.0513	0.0388	0.433	|	4	107	0.0373832	2	87	0.0229885	4	90	0.0444444	5	95	0.0526316	2	86	0.0232558	13	78	0.166667	|	5	144	0.0347222	3	103	0.0291262
chr1	143755378	-	T	chr1:143755378	Trove2	SINE	UTR	3_prime_UTR_variant	1	1	143755754	376	upstream	UTR	-0.00579694	0.704	0.707	0.968	|	-0.243362	0.64	0.758	0.152	|	69	115	0.6	71	88	0.806818	70	96	0.729167	71	97	0.731959	65	96	0.677083	57	81	0.703704	|	112	149	0.751678	88	108	0.814815
chr1	143755383	-	T	chr1:143755383	Trove2	SINE	UTR	3_prime_UTR_variant	1	1	143755636	253	upstream	UTR	-0.303928	0.0649	0.0801	0.446	|	0.607747	0.0385	0.0253	0.534	|	8	111	0.0720721	9	84	0.107143	6	90	0.0666667	4	89	0.0449438	8	90	0.0888889	5	73	0.0684932	|	8	136	0.0588235	1	108	0.00925926
chr1	143755756	-	T	chr1:143755756	Trove2	SINE	UTR	3_prime_UTR_variant	0	0	143755376	380	downstream	UTR	-0.186638	0.0428	0.0487	0.722	|	0.188851	0.0542	0.0475	0.744	|	5	179	0.027933	11	137	0.080292	11	214	0.0514019	7	134	0.0522388	6	167	0.0359281	6	144	0.0416667	|	6	189	0.031746	5	95	0.0526316
chr1	143755761	-	T	chr1:143755761	Trove2	SINE	UTR	3_prime_UTR_variant	0	0	-	-	-	-	-0.084094	0.0279	0.0296	0.86	|	0.326317	0.0341	0.0272	0.513	|	4	179	0.0223464	5	137	0.0364964	7	220	0.0318182	6	135	0.0444444	3	170	0.0176471	4	144	0.0277778	|	3	192	0.015625	3	95	0.0315789
chr1	143755767	+	A	chr1:143755767	Trove2	SINE	UTR	3_prime_UTR_variant	0	0	143755366	401	upstream	UTR	0.204928	0.0238	0.0206	0.618	|	0.666913	0.0273	0.0172	0.552	|	4	181	0.0220994	4	135	0.0296296	3	224	0.0133929	3	138	0.0217391	5	171	0.0292398	3	142	0.0211268	|	1	195	0.00512821	4	95	0.0421053
chr1	143755824	-	T	chr1:143755824	Trove2	SINE	UTR	3_prime_UTR_variant	0	0	143756338	514	upstream	UTR	-0.751846	0.0133	0.0223	0.28	|	1.97822	0.0252	0.0064	0.288	|	4	176	0.0227273	4	139	0.028777	4	235	0.0170213	1	131	0.00763359	2	169	0.0118343	4	155	0.0258065	|	5	206	0.0242718	0	91	0
chr1	150383808	-	T	chr1:150383808	BC003331	SINE	Intron	non_coding_transcript_variant	0	0	-	-	-	-	-1.98859	0.00585	0.0232	0.592	|	2.658	0.205	0.0324	0.412	|	1	8	0.125	0	5	0	1	10	0.1	0	6	0	0	5	0	1	5	0.2	|	0	10	0	3	8	0.375
chr1	150384054	-	T	chr1:150384054	BC003331	SINE	Intron	non_coding_transcript_variant	1	1	-	-	-	-	-6.61765	0.001	0.0982	0.000721	|	-2.2478	0.001	0.00475	0.423	|	1	12	0.0833333	2	16	0.125	1	11	0.0909091	0	9	0	0	16	0	0	8	0	|	3	28	0.107143	0	5	0
chr1	151405916	-	T	chr1:151405916	Swt1	SINE	Intron	NMD_transcript_variant	0	0	-	-	-	-	-5.00823	0.0055	0.177	0.174	|	-0.226024	0.0347	0.0405	0.954	|	1	10	0.1	1	6	0.166667	4	12	0.333333	0	9	0	0	12	0	2	12	0.166667	|	4	10	0.4	0	7	0
chr1	153116762	+	A	chr1:153116762	Nmnat2	.	UTR	3_prime_UTR_variant	0	0	-	-	-	-	0.406223	0.0328	0.0248	0.0592	|	-0.506042	0.0208	0.0295	0.264	|	9	316	0.028481	6	258	0.0232558	8	348	0.0229885	8	278	0.028777	11	340	0.0323529	11	289	0.0380623	|	11	401	0.0274314	10	236	0.0423729
chr1	153116765	+	A	chr1:153116765	Nmnat2	.	UTR	3_prime_UTR_variant	0	0	-	-	-	-	0.57845	0.0276	0.0185	0.0572	|	1.15777	0.0342	0.0153	0.0239	|	5	318	0.0157233	6	257	0.0233463	6	348	0.0172414	7	278	0.0251799	9	342	0.0263158	9	283	0.0318021	|	5	404	0.0123762	5	239	0.0209205
chr1	153116766	+	A	chr1:153116766	Nmnat2	.	UTR	3_prime_UTR_variant	0	0	-	-	-	-	-0.527405	0.0131	0.0189	0.521	|	-0.787135	0.0139	0.024	0.18	|	8	322	0.0248447	5	257	0.0194553	5	356	0.0140449	4	286	0.013986	2	350	0.00571429	8	282	0.0283688	|	6	422	0.014218	9	245	0.0367347
chr1	153220698	-	T	chr1:153220698	Lamc1	.	UTR	3_prime_UTR_variant	0	0	-	-	-	-	-2.66892	0.0173	0.11	0.325	|	2.58285	0.0966	0.0161	0.327	|	4	42	0.0952381	5	33	0.151515	5	54	0.0925926	2	35	0.0571429	0	46	0	3	33	0.0909091	|	1	13	0.0769231	0	15	0
chr1	155206782	+	A	chr1:155206782	Stx6	.	intergenic	intron_variant	0	0	-	-	-	-	-0.14432	0.00333	0.00368	0.958	|	1.43198	0.00997	0.0037	0.6	|	0	26	0	0	20	0	2	40	0.05	0	35	0	0	47	0	1	27	0.037037	|	0	26	0	0	21	0
chr1	155364274	-	T	chr1:155364274	Xpr1	SINE	Intron	non_coding_transcript_variant	0	0	-	-	-	-	-1.52449	0.0055	0.0158	0.658	|	-2.38614	0.001	0.00523	0.423	|	2	21	0.0952381	0	11	0	1	24	0.0416667	0	24	0	0	16	0	1	6	0.166667	|	1	7	0.142857	0	5	0
chr1	156427536	-	T	chr1:156427536	Soat1	SINE	UTR	3_prime_UTR_variant	0	0	156429240	1704	upstream	UTR	4.22284	0.0934	0.005	0.209	|	0.872479	0.0358	0.0196	0.726	|	0	29	0	3	24	0.125	0	35	0	3	32	0.09375	5	36	0.138889	1	16	0.0625	|	4	41	0.097561	0	24	0
chr1	156427547	-	T	chr1:156427547	Soat1	SINE	UTR	3_prime_UTR_variant	0	0	156429229	1682	upstream	UTR	-1.81407	0.00382	0.0134	0.543	|	-1.73697	0.00464	0.0155	0.591	|	0	28	0	2	23	0.0869565	1	36	0.0277778	0	32	0	2	36	0.0555556	0	16	0	|	2	40	0.05	0	26	0
chr1	156427550	-	T	chr1:156427550	Soat1	SINE	UTR	3_prime_UTR_variant	0	0	156429225	1675	upstream	UTR	3.777	0.0607	0.00443	0.216	|	1.39306	0.00968	0.00368	0.609	|	0	28	0	2	23	0.0869565	0	34	0	1	31	0.0322581	4	36	0.111111	1	16	0.0625	|	2	40	0.05	0	25	0
chr1	156427612	-	T	chr1:156427612	Soat1	SINE	UTR	3_prime_UTR_variant	1	1	156429165	1553	upstream	UTR	0.0365066	0.55	0.537	0.902	|	-0.77452	0.374	0.641	0.0614	|	16	29	0.551724	9	15	0.6	14	30	0.466667	16	32	0.5	13	30	0.433333	10	13	0.769231	|	13	27	0.481481	14	19	0.736842
chr1	156427964	-	T	chr1:156427964	Soat1	SINE	UTR	3_prime_UTR_variant	0	0	-	-	-	-	-0.148182	0.013	0.0145	0.959	|	-0.0384924	0.00425	0.00437	0.99	|	0	35	0	3	31	0.0967742	1	32	0.03125	1	30	0.0333333	0	22	0	1	15	0.0666667	|	0	23	0	0	17	0
chr1	156428031	-	T	chr1:156428031	Soat1	SINE	UTR	3_prime_UTR_variant	1	1	-	-	-	-	0.0227219	0.341	0.336	0.952	|	-1.601	0.131	0.398	0.21	|	8	33	0.242424	14	33	0.424242	21	57	0.368421	16	40	0.4	6	25	0.24	12	29	0.413793	|	6	24	0.25	8	15	0.533333
chr1	156429238	-	T	chr1:156429238	Soat1	SINE	UTR	3_prime_UTR_variant	0	0	156427537	1701	downstream	UTR	-0.974967	0.0318	0.0625	0.734	|	2.57625	0.0247	0.00415	0.454	|	1	18	0.0555556	1	12	0.0833333	1	19	0.0526316	0	7	0	3	17	0.176471	2	11	0.181818	|	0	10	0	0	5	0
chr1	156598383	+	A	chr1:156598383	Abl2	LTR	Intron	intron_variant	0	0	-	-	-	-	2.69375	0.0275	0.00425	0.446	|	2.05281	0.0288	0.00693	0.609	|	0	10	0	1	13	0.0769231	0	6	0	3	16	0.1875	0	10	0	1	9	0.111111	|	0	9	0	2	6	0.333333
chr1	156598385	+	A	chr1:156598385	Abl2	LTR	Intron	intron_variant	0	0	-	-	-	-	-0.0998534	0.00397	0.00425	0.974	|	0	0.001	0.001	---	|	0	10	0	1	13	0.0769231	0	6	0	1	16	0.0625	0	9	0	0	9	0	|	0	9	0	0	6	0
chr1	156598386	+	A	chr1:156598386	Abl2	LTR	Intron	intron_variant	0	0	-	-	-	-	4.92055	0.0303	0.001	0.186	|	2.46027	0.0055	0.001	0.423	|	0	10	0	0	13	0	0	6	0	4	16	0.25	1	9	0.111111	0	9	0	|	0	9	0	0	6	0
chr1	157221225	-	T	chr1:157221225	Rasal2	LTR	Intron	intron_variant	0	0	-	-	-	-	-2.16878	0.001	0.0045	0.423	|	-2.21462	0.001	0.00464	0.423	|	0	12	0	0	6	0	1	11	0.0909091	0	13	0	0	5	0	0	7	0	|	0	9	0	1	10	0.1
chr1	157221470	-	T	chr1:157221470	Rasal2	LTR	Intron	intron_variant	0	0	-	-	-	-	-0.150837	0.00425	0.00472	0.963	|	3.94804	0.0154	0.001	0.184	|	0	14	0	2	19	0.105263	0	19	0	1	13	0.0769231	0	13	0	0	8	0	|	0	12	0	0	6	0
chr1	157221513	-	T	chr1:157221513	Rasal2	LTR	Intron	intron_variant	0	0	-	-	-	-	0	0.001	0.001	---	|	-2.21462	0.001	0.00464	0.423	|	0	15	0	0	13	0	0	14	0	0	22	0	0	9	0	0	12	0	|	1	10	0.1	0	7	0
chr1	158426663	+	A	chr1:158426663	Astn1	.	Intron	intron_variant	0	0	158425937	726	upstream	intronic	2.21462	0.00464	0.001	0.423	|	0.239964	0.0049	0.00415	0.942	|	0	23	0	0	10	0	0	13	0	0	28	0	0	16	0	1	10	0.1	|	0	8	0	0	14	0
chr1	158505693	+	A	chr1:158505693	Astn1,Gm37679,Mir488	.	Exon	non_coding_transcript_exon_variant	0	0	-	-	-	-	2.01963	0.00405	0.001	0.423	|	2.42178	0.00536	0.001	0.423	|	0	5	0	0	7	0	0	7	0	0	17	0	1	15	0.0666667	0	8	0	|	0	8	0	0	8	0
chr1	158670965	+	A	chr1:158670965	Astn1	.	Intron	intron_variant	0	0	-	-	-	-	-0.203812	0.126	0.146	0.78	|	-2.93195	0.00464	0.0354	0.438	|	1	9	0.111111	1	12	0.0833333	5	15	0.333333	2	15	0.133333	1	6	0.166667	1	11	0.0909091	|	1	6	0.166667	0	8	0
chr1	159345240	+	A	chr1:159345240	Mir1843b,Rfwd2,Scarna3a	SINE	UTR	3_prime_UTR_variant	0	0	-	-	-	-	-1.18874	0.00865	0.0197	0.527	|	-0.858823	0.0107	0.0195	0.684	|	2	140	0.0142857	2	105	0.0190476	4	142	0.028169	3	122	0.0245902	0	133	0	3	114	0.0263158	|	1	108	0.00925926	3	69	0.0434783
chr1	159350539	+	A	chr1:159350539	Rfwd2	SINE	intergenic	downstream_gene_variant	0	0	-	-	-	-	1.405	0.0153	0.00577	0.687	|	-0.861654	0.00333	0.00606	0.798	|	0	19	0	0	22	0	5	26	0.192308	3	30	0.1	1	28	0.0357143	0	25	0	|	0	19	0	0	13	0
chr1	159350542	+	A	chr1:159350542	Rfwd2	SINE	intergenic	downstream_gene_variant	0	0	-	-	-	-	-0.837021	0.0815	0.146	0.521	|	-3.18358	0.0042	0.0382	0.4	|	2	19	0.105263	2	21	0.0952381	8	26	0.307692	10	30	0.333333	1	28	0.0357143	1	22	0.0454545	|	3	18	0.166667	0	14	0
chr1	160254635	-	T	chr1:160254635	Rabgap1l	SINE	Intron	non_coding_transcript_variant	0	0	160256000	1365	upstream	intronic	-1.81407	0.001	0.00352	0.423	|	-3.66107	0.001	0.0127	0.184	|	0	15	0	0	15	0	1	23	0.0434783	0	17	0	0	23	0	0	15	0	|	0	12	0	1	19	0.0526316
chr1	160256022	-	T	chr1:160256022	Rabgap1l	SINE	Intron	non_coding_transcript_variant	0	0	-	-	-	-	2.03563	0.123	0.0301	0.499	|	0.0181493	0.0243	0.024	0.996	|	0	18	0	2	11	0.181818	3	20	0.15	1	20	0.05	2	14	0.142857	5	19	0.263158	|	2	12	0.166667	0	6	0
chr1	161011756	-	T	chr1:161011756	Zbtb37	SINE	UTR	3_prime_UTR_variant	0	0	-	-	-	-	-5.51171	0.001	0.0456	0.00411	|	5.56835	0.0475	0.001	0.00197	|	1	30	0.0333333	1	26	0.0384615	2	27	0.0740741	0	36	0	0	19	0	0	25	0	|	0	16	0	0	18	0
chr1	161011757	-	T	chr1:161011757	Zbtb37	SINE	UTR	3_prime_UTR_variant	0	0	-	-	-	-	0.0631593	0.0113	0.0109	0.981	|	1.50946	0.0109	0.00382	0.591	|	1	30	0.0333333	1	26	0.0384615	0	27	0	1	36	0.0277778	1	19	0.0526316	0	25	0	|	0	16	0	1	18	0.0555556
chr1	161012364	-	T	chr1:161012364	Zbtb37	SINE	UTR	3_prime_UTR_variant	0	0	-	-	-	-	0.473223	0.0207	0.0149	0.883	|	-1.91655	0.00786	0.0297	0.547	|	4	54	0.0740741	0	30	0	3	67	0.0447761	2	46	0.0434783	10	49	0.204082	0	28	0	|	0	49	0	4	27	0.148148
chr1	161013004	-	T	chr1:161013004	Zbtb37	SINE	UTR	3_prime_UTR_variant	0	0	-	-	-	-	1.29296	0.0443	0.0181	0.608	|	-0.531454	0.0642	0.0928	0.451	|	4	51	0.0784314	0	35	0	4	53	0.0754717	1	50	0.02	6	53	0.113208	2	52	0.0384615	|	2	34	0.0588235	2	30	0.0666667
chr1	161015179	-	T	chr1:161015179	Zbtb37	SINE	UTR	3_prime_UTR_variant	0	0	-	-	-	-	-0.251028	0.034	0.0405	0.823	|	-0.298497	0.0354	0.0435	0.78	|	5	89	0.0561798	1	68	0.0147059	7	87	0.0804598	7	85	0.0823529	1	72	0.0138889	2	58	0.0344828	|	1	76	0.0131579	3	41	0.0731707
chr1	162596010	+	A	chr1:162596010	Vamp4	SINE	Intron	intron_variant	1	1	162598194	2184	downstream	UTR	4.26743	0.0193	0.001	0.189	|	0	0.001	0.001	---	|	0	21	0	0	18	0	0	17	0	0	11	0	1	20	0.05	2	14	0.142857	|	0	22	0	0	12	0
chr1	162598198	+	A	chr1:162598198	Vamp4	SINE	UTR	3_prime_UTR_variant	1	1	162596004	2194	upstream	intronic	-1.21719	0.0177	0.0412	0.617	|	1.00161	0.0719	0.0359	0.224	|	2	47	0.0425532	1	23	0.0434783	2	53	0.0377358	2	30	0.0666667	0	38	0	3	36	0.0833333	|	2	32	0.0625	1	27	0.037037
chr1	162598204	+	A	chr1:162598204	Vamp4	SINE	UTR	3_prime_UTR_variant	1	1	162596000	2204	upstream	intronic	2.27108	0.0385	0.00797	0.267	|	0.616434	0.0548	0.0358	0.353	|	1	43	0.0232558	0	19	0	1	46	0.0217391	1	26	0.0384615	2	41	0.0487805	1	33	0.030303	|	2	33	0.0606061	1	26	0.0384615
chr1	162693984	-	T	chr1:162693984	Prrc2c	SINE	Intron	intron_variant	0	0	162695487	1503	upstream	intronic	-4.31619	0.001	0.0199	0.184	|	0	0.001	0.001	---	|	1	11	0.0909091	0	18	0	2	23	0.0869565	0	15	0	0	24	0	0	5	0	|	0	6	0	0	9	0
chr1	162694013	-	T	chr1:162694013	Prrc2c	SINE	Intron	intron_variant	0	0	162695458	1445	upstream	intronic	-4.05007	0.001	0.0166	0.187	|	-0.699845	0.00405	0.00659	0.847	|	1	10	0.1	0	19	0	1	22	0.0454545	0	13	0	0	21	0	0	6	0	|	2	7	0.285714	0	12	0
chr1	162695457	-	T	chr1:162695457	Prrc2c	SINE	Intron	intron_variant	0	0	162694014	1443	downstream	intronic	0.0534882	0.00389	0.00375	0.985	|	-2.29277	0.001	0.0049	0.423	|	0	23	0	0	14	0	1	19	0.0526316	1	17	0.0588235	0	15	0	0	16	0	|	0	11	0	0	7	0
chr1	162695460	-	T	chr1:162695460	Prrc2c	SINE	Intron	intron_variant	0	0	162694011	1449	downstream	intronic	0.246513	0.0165	0.0139	0.933	|	0.0601907	0.0263	0.0252	0.986	|	1	22	0.0454545	0	13	0	1	17	0.0588235	0	18	0	1	14	0.0714286	1	16	0.0625	|	1	11	0.0909091	0	7	0
chr1	162695470	-	T	chr1:162695470	Prrc2c	SINE	Intron	intron_variant	0	0	162694001	1469	downstream	intronic	-3.90837	0.00425	0.0639	0.201	|	-0.0418436	0.00437	0.0045	0.99	|	1	20	0.05	1	12	0.0833333	1	16	0.0625	0	18	0	0	10	0	1	13	0.0769231	|	1	11	0.0909091	0	7	0
chr1	162695478	-	T	chr1:162695478	Prrc2c	SINE	Intron	intron_variant	0	0	162693995	1483	downstream	intronic	-2.07345	0.00561	0.0236	0.574	|	-0.180189	0.005	0.00567	0.96	|	3	19	0.157895	1	12	0.0833333	0	13	0	3	17	0.176471	0	10	0	0	11	0	|	2	11	0.181818	0	6	0
chr1	165988152	-	T	chr1:165988152	Pou2f1	LTR	Intron	non_coding_transcript_variant	0	0	-	-	-	-	-3.56758	0.001	0.0119	0.185	|	-1.6863	0.001	0.00322	0.423	|	1	20	0.05	1	30	0.0333333	0	23	0	0	22	0	0	30	0	0	24	0	|	0	11	0	0	11	0
chr1	168316178	-	T	chr1:168316178	Pbx1	SINE	Intron	non_coding_transcript_variant	0	0	-	-	-	-	-1.82294	0.0158	0.0559	0.468	|	4.24071	0.0189	0.001	0.185	|	4	53	0.0754717	1	40	0.025	5	54	0.0925926	2	52	0.0384615	4	39	0.102564	0	33	0	|	0	6	0	0	11	0
chr1	168364626	-	T	chr1:168364626	Pbx1	Unknown	Intron	non_coding_transcript_variant	0	0	-	-	-	-	0.823123	0.0349	0.0198	0.25	|	4.21126	0.0603	0.00325	0.13	|	1	76	0.0131579	1	69	0.0144928	4	99	0.040404	3	93	0.0322581	2	63	0.031746	3	72	0.0416667	|	0	30	0	0	19	0
chr1	168374656	-	T	chr1:168374656	Pbx1	SINE	Intron	non_coding_transcript_variant	0	0	-	-	-	-	0.368298	0.0944	0.0731	0.595	|	-2.95335	0.016	0.124	0.279	|	6	74	0.0810811	7	86	0.0813953	8	135	0.0592593	14	97	0.14433	3	71	0.0422535	12	87	0.137931	|	7	28	0.25	1	21	0.047619
chr1	168374687	-	T	chr1:168374687	Pbx1	SINE	Intron	non_coding_transcript_variant	0	0	-	-	-	-	0.292046	0.0743	0.0607	0.702	|	-1.20354	0.0516	0.119	0.277	|	6	66	0.0909091	7	75	0.0933333	3	114	0.0263158	4	86	0.0465116	7	67	0.104478	7	83	0.0843373	|	9	26	0.346154	1	20	0.05
chr1	168397792	-	T	chr1:168397792	Pbx1	SINE	Intron	non_coding_transcript_variant	0	0	168399121	1329	upstream	Intron	1.7135	0.0162	0.00493	0.619	|	2.19116	0.0185	0.00405	0.495	|	0	14	0	3	25	0.12	0	33	0	1	45	0.0222222	0	31	0	4	21	0.190476	|	0	7	0	0	11	0
chr1	168403304	-	T	chr1:168403304	Pbx1	.	Intron	non_coding_transcript_variant	0	0	-	-	-	-	0.0673589	0.881	0.841	0.181	|	3.02201	0.772	0.095	0.455	|	60	72	0.833333	33	39	0.846154	81	96	0.84375	78	87	0.896552	53	63	0.84127	49	54	0.907407	|	13	13	1	12	14	0.857143
chr1	171137375	-	T	chr1:171137375	Sdhc	SINE	Intron	intron_variant	0	0	-	-	-	-	0.474302	0.368	0.265	0.367	|	1.81324	0.151	0.0431	0.576	|	4	13	0.307692	3	9	0.333333	2	11	0.181818	6	10	0.6	3	9	0.333333	4	16	0.25	|	4	10	0.4	1	5	0.2
chr1	171137433	-	T	chr1:171137433	Sdhc	SINE	Intron	intron_variant	0	0	-	-	-	-	-0.0344293	0.25	0.256	0.952	|	-0.0952515	0.0361	0.0385	0.981	|	3	16	0.1875	4	16	0.25	5	14	0.357143	6	15	0.4	2	7	0.285714	3	22	0.136364	|	4	14	0.285714	1	5	0.2
chr1	171138294	-	T	chr1:171138294	Sdhc	SINE	Intron	intron_variant	1	1	171139710	1416	upstream	intronic	-0.765152	0.114	0.194	0.396	|	-0.657329	0.00389	0.00613	0.851	|	3	11	0.272727	3	14	0.214286	2	16	0.125	1	8	0.125	5	20	0.25	1	21	0.047619	|	3	13	0.230769	0	10	0
chr1	172092348	+	A	chr1:172092348	Copa,Gm37756,Gm38164	.	Exon	missense_variant	0	0	-	-	-	-	-0.0113158	0.145	0.146	0.978	|	0.0269622	0.148	0.145	0.875	|	8	54	0.148148	10	61	0.163934	9	70	0.128571	9	61	0.147541	14	63	0.222222	4	43	0.0930233	|	10	65	0.153846	6	47	0.12766
chr1	175161427	-	T	chr1:175161427	Rgs7	.	Intron	intron_variant	0	0	-	-	-	-	0	0.001	0.001	---	|	2.54795	0.00585	0.001	0.423	|	0	14	0	0	14	0	0	19	0	0	8	0	0	21	0	0	7	0	|	0	10	0	0	10	0
chr1	176729258	-	T	chr1:176729258	Cep170	SINE	intergenic	downstream_gene_variant	0	0	-	-	-	-	-1.50486	0.00347	0.00984	0.572	|	-1.53872	0.0217	0.063	0.568	|	1	25	0.04	0	25	0	1	42	0.0238095	0	47	0	0	40	0	1	24	0.0416667	|	1	12	0.0833333	1	9	0.111111
chr1	177155570	-	T	chr1:177155570	Akt3	LINE	Intron	intron_variant	0	0	177156657	1087	upstream	intronic	-0.553926	0.0897	0.132	0.495	|	2.82058	0.159	0.0225	0.336	|	3	22	0.136364	3	28	0.107143	5	32	0.15625	3	22	0.136364	1	28	0.0357143	4	27	0.148148	|	1	11	0.0909091	0	11	0
chr1	177155578	-	T	chr1:177155578	Akt3	LINE	Intron	intron_variant	0	0	177156649	1071	upstream	intronic	1.45805	0.0406	0.0148	0.537	|	2.54795	0.00585	0.001	0.423	|	2	23	0.0869565	0	28	0	1	27	0.037037	1	21	0.047619	1	23	0.0434783	1	31	0.0322581	|	0	9	0	0	11	0
chr1	177156460	-	T	chr1:177156460	Akt3	LINE	Intron	intron_variant	0	0	177155747	713	downstream	intronic	-1.98859	0.001	0.00397	0.423	|	0	0.001	0.001	---	|	0	27	0	1	16	0.0625	0	34	0	0	18	0	0	21	0	0	19	0	|	0	7	0	0	18	0
chr1	177241264	-	T	chr1:177241264	Akt3	SINE	Intron	intron_variant	0	0	-	-	-	-	0.609821	0.0529	0.0347	0.545	|	-0.457571	0.045	0.0618	0.203	|	6	103	0.0582524	1	70	0.0142857	5	100	0.05	2	94	0.0212766	7	94	0.0744681	7	75	0.0933333	|	4	51	0.0784314	2	37	0.0540541
chr1	177241275	-	T	chr1:177241275	Akt3	SINE	Intron	intron_variant	0	0	-	-	-	-	0.706573	0.0448	0.0275	0.324	|	0.638639	0.0344	0.0221	0.496	|	4	97	0.0412371	1	67	0.0149254	3	89	0.0337079	4	91	0.043956	7	91	0.0769231	2	75	0.0266667	|	1	47	0.0212766	1	34	0.0294118
chr1	177241301	-	T	chr1:177241301	Akt3	SINE	Intron	intron_variant	0	0	-	-	-	-	1.11807	0.0394	0.0181	0.17	|	-3.173	0.00437	0.0394	0.273	|	1	94	0.0106383	1	66	0.0151515	3	81	0.037037	3	84	0.0357143	2	75	0.0266667	5	78	0.0641026	|	2	47	0.0425532	1	36	0.0277778
chr1	177449120	+	A	chr1:177449120	Zbtb18	.	UTR	3_prime_UTR_variant	0	0	-	-	-	-	-0.397828	0.0154	0.0202	0.124	|	0.551108	0.0253	0.0173	0.261	|	28	1672	0.0167464	34	1418	0.0239774	38	1844	0.0206074	17	1294	0.0131376	26	1727	0.015055	27	1476	0.0182927	|	38	1596	0.0238095	12	1129	0.0106289
chr1	178333255	-	T	chr1:178333255	Hnrnpu	SINE	Intron	non_coding_transcript_variant	0	0	-	-	-	-	2.94764	0.0492	0.00638	0.49	|	-0.660975	0.0165	0.026	0.842	|	0	18	0	0	10	0	7	27	0.259259	5	18	0.277778	6	14	0.428571	0	10	0	|	0	18	0	1	10	0.1
chr1	178333256	-	T	chr1:178333256	Hnrnpu	SINE	Intron	non_coding_transcript_variant	0	0	-	-	-	-	0.964362	0.0317	0.0162	0.781	|	0.695821	0.0063	0.00389	0.844	|	1	18	0.0555556	0	10	0	2	26	0.0769231	2	18	0.111111	4	14	0.285714	0	10	0	|	0	18	0	0	9	0
chr1	179766563	-	T	chr1:179766563	Ahctf1	SINE	Intron	intron_variant	0	0	179766916	353	upstream	intronic	2.38614	0.00523	0.001	0.423	|	-0.528321	0.00405	0.00585	0.879	|	0	10	0	0	10	0	0	14	0	1	7	0.142857	0	18	0	0	8	0	|	0	8	0	1	5	0.2
chr1	179771234	-	T	chr1:179771234	Ahctf1	SINE	Intron	intron_variant	0	0	-	-	-	-	-1.89877	0.00523	0.0195	0.588	|	-0.0705014	0.0216	0.0227	0.983	|	1	18	0.0555556	0	7	0	2	15	0.133333	0	10	0	0	17	0	2	14	0.142857	|	0	12	0	1	9	0.111111
chr1	179771259	-	T	chr1:179771259	Ahctf1	SINE	Intron	intron_variant	0	0	179771910	651	upstream	intronic	2.3023	0.0299	0.00606	0.557	|	0.482486	0.00648	0.00464	0.897	|	0	23	0	2	9	0.222222	0	17	0	1	10	0.1	0	19	0	4	15	0.266667	|	1	10	0.1	0	10	0
chr1	180085072	+	A	chr1:180085072	Cdc42bpa	SINE	Intron	non_coding_transcript_variant	0	0	180087128	2056	downstream	intronic	-1.63364	0.0137	0.0424	0.482	|	2.12892	0.0111	0.00254	0.391	|	1	24	0.0416667	2	39	0.0512821	1	28	0.0357143	1	27	0.037037	2	29	0.0689655	0	17	0	|	0	19	0	0	29	0
chr1	180085093	+	A	chr1:180085093	Cdc42bpa	SINE	Intron	non_coding_transcript_variant	0	0	180087108	2015	downstream	intronic	0.0258263	0.0132	0.013	0.993	|	2.61178	0.0157	0.00257	0.358	|	0	21	0	2	34	0.0588235	1	27	0.037037	2	29	0.0689655	1	30	0.0333333	0	17	0	|	0	20	0	0	31	0
chr1	180085117	+	A	chr1:180085117	Cdc42bpa	SINE	Intron	non_coding_transcript_variant	0	0	180087085	1968	downstream	intronic	-1.16073	0.0162	0.0363	0.629	|	4.07936	0.0169	0.001	0.188	|	1	24	0.0416667	1	30	0.0333333	1	29	0.0344828	3	28	0.107143	1	25	0.04	0	16	0	|	0	22	0	0	30	0
chr1	180085120	+	A	chr1:180085120	Cdc42bpa	SINE	Intron	non_coding_transcript_variant	0	0	180087082	1962	downstream	intronic	-3.02912	0.0172	0.14	0.288	|	0.666667	0.099	0.0624	0.571	|	2	24	0.0833333	6	26	0.230769	4	28	0.142857	1	27	0.037037	3	22	0.136364	0	16	0	|	4	22	0.181818	1	30	0.0333333
chr1	180085127	+	A	chr1:180085127	Cdc42bpa	SINE	Intron	non_coding_transcript_variant	0	0	180087076	1949	downstream	intronic	0.572069	0.0771	0.0518	0.398	|	2.33274	0.0178	0.00354	0.448	|	1	23	0.0434783	1	24	0.0416667	2	26	0.0769231	4	26	0.153846	1	21	0.047619	1	16	0.0625	|	0	21	0	0	27	0
chr1	180085132	+	A	chr1:180085132	Cdc42bpa	SINE	Intron	non_coding_transcript_variant	0	0	180087069	1937	downstream	intronic	-0.814074	0.0159	0.0279	0.808	|	0.851157	0.1	0.0556	0.48	|	0	20	0	4	23	0.173913	3	24	0.125	2	25	0.08	1	20	0.05	0	15	0	|	4	21	0.190476	1	27	0.037037
chr1	180085135	+	A	chr1:180085135	Cdc42bpa	SINE	Intron	non_coding_transcript_variant	0	0	180087067	1932	downstream	intronic	-1.92313	0.00437	0.0166	0.55	|	0.792837	0.0237	0.0137	0.803	|	1	20	0.05	0	23	0	2	22	0.0909091	2	24	0.0833333	0	18	0	0	14	0	|	1	20	0.05	0	25	0
chr1	180087041	+	A	chr1:180087041	Cdc42bpa	SINE	Intron	non_coding_transcript_variant	0	0	180085161	1880	upstream	intronic	0.207163	0.0234	0.0203	0.951	|	-1.82518	0.0247	0.0874	0.519	|	0	12	0	1	12	0.0833333	2	20	0.1	2	13	0.153846	1	12	0.0833333	0	13	0	|	4	20	0.2	3	29	0.103448
chr1	180087085	+	A	chr1:180087085	Cdc42bpa	SINE	Intron	non_coding_transcript_variant	0	0	180085117	1968	upstream	intronic	0.314472	0.00425	0.00342	0.914	|	1.36477	0.0116	0.0045	0.652	|	0	13	0	0	10	0	1	25	0.04	1	13	0.0769231	0	15	0	0	13	0	|	2	22	0.0909091	0	26	0
chr1	180087122	+	A	chr1:180087122	Cdc42bpa	SINE	Intron	non_coding_transcript_variant	0	0	180085079	2043	upstream	intronic	-1.6863	0.001	0.00322	0.423	|	4.35019	0.0981	0.00481	0.19	|	0	11	0	0	12	0	1	30	0.0333333	0	14	0	0	18	0	0	13	0	|	2	18	0.111111	0	25	0
chr1	180090274	+	A	chr1:180090274	Cdc42bpa	.	Intron	non_coding_transcript_variant	1	1	-	-	-	-	0.468389	0.393	0.284	0.289	|	-0.0216346	0.148	0.15	0.982	|	6	15	0.4	5	19	0.263158	10	46	0.217391	5	11	0.454545	7	14	0.5	4	15	0.266667	|	5	39	0.128205	2	31	0.0645161
chr1	180093560	+	A	chr1:180093560	Cdc42bpa	SINE	Intron	non_coding_transcript_variant	0	0	-	-	-	-	0.162411	0.011	0.00979	0.951	|	-2.23035	0.00352	0.0165	0.465	|	1	68	0.0147059	3	47	0.0638298	0	84	0	2	80	0.025	4	76	0.0526316	0	69	0	|	5	42	0.119048	0	20	0
chr1	180093562	+	A	chr1:180093562	Cdc42bpa	SINE	Intron	non_coding_transcript_variant	0	0	-	-	-	-	-1.80106	0.0138	0.0481	0.446	|	1.77072	0.0144	0.00423	0.569	|	2	69	0.0289855	5	47	0.106383	3	83	0.0361446	4	81	0.0493827	4	75	0.0533333	0	68	0	|	0	41	0	0	20	0
chr1	180093563	+	A	chr1:180093563	Cdc42bpa	SINE	Intron	non_coding_transcript_variant	0	0	-	-	-	-	1.84052	0.031	0.00866	0.36	|	0.266122	0.00352	0.00292	0.917	|	2	67	0.0298507	1	46	0.0217391	0	83	0	2	80	0.025	3	74	0.0405405	2	68	0.0294118	|	1	40	0.025	0	19	0
chr1	180093569	+	A	chr1:180093569	Cdc42bpa	SINE	Intron	non_coding_transcript_variant	0	0	-	-	-	-	-0.723665	0.0239	0.0395	0.462	|	0.132315	0.0485	0.0442	0.904	|	3	60	0.05	1	42	0.0238095	4	77	0.0519481	1	81	0.0123457	4	58	0.0689655	1	62	0.016129	|	3	38	0.0789474	1	19	0.0526316
chr1	180097633	+	A	chr1:180097633	Cdc42bpa	LTR	Intron	NMD_transcript_variant	0	0	-	-	-	-	3.09231	0.00853	0.001	0.186	|	-2.07732	0.00352	0.0148	0.479	|	0	24	0	0	20	0	0	22	0	1	52	0.0192308	0	31	0	1	31	0.0322581	|	0	14	0	1	17	0.0588235
chr1	180097646	+	A	chr1:180097646	Cdc42bpa	LTR	Intron	NMD_transcript_variant	0	0	-	-	-	-	2.0703	0.0042	0.001	0.423	|	0.245655	0.0848	0.0716	0.603	|	0	21	0	0	18	0	0	23	0	0	47	0	0	31	0	2	27	0.0740741	|	1	13	0.0769231	1	14	0.0714286
chr1	180097747	+	A	chr1:180097747	Cdc42bpa	LTR	Intron	NMD_transcript_variant	0	0	180099346	1599	downstream	intronic	-0.0246669	0.00368	0.00375	0.993	|	4.01225	0.0161	0.001	0.184	|	1	19	0.0526316	0	17	0	0	42	0	0	31	0	0	32	0	1	20	0.05	|	0	10	0	0	14	0
chr1	180097751	+	A	chr1:180097751	Cdc42bpa	LTR	Intron	NMD_transcript_variant	0	0	180099343	1592	downstream	intronic	-1.90595	0.001	0.00375	0.423	|	4.57504	0.0805	0.00338	0.119	|	1	19	0.0526316	0	17	0	0	41	0	0	28	0	0	32	0	0	18	0	|	0	11	0	0	12	0
chr1	180097765	+	A	chr1:180097765	Cdc42bpa	LTR	Intron	NMD_transcript_variant	0	0	-	-	-	-	1.93195	0.00382	0.001	0.423	|	2.42178	0.0234	0.00437	0.48	|	0	17	0	0	14	0	0	35	0	0	23	0	0	24	0	1	18	0.0555556	|	0	10	0	1	12	0.0833333
chr1	180097766	+	A	chr1:180097766	Cdc42bpa	LTR	Intron	NMD_transcript_variant	0	0	-	-	-	-	-2.53151	0.00352	0.0203	0.427	|	-1.01689	0.0358	0.0724	0.734	|	1	17	0.0588235	0	14	0	5	35	0.142857	1	23	0.0434783	0	24	0	0	18	0	|	1	10	0.1	1	12	0.0833333
chr1	180100593	+	A	chr1:180100593	Cdc42bpa	LTR	Intron	NMD_transcript_variant	0	0	-	-	-	-	0.415976	0.0228	0.0171	0.899	|	0	0.001	0.001	---	|	2	21	0.0952381	0	15	0	1	19	0.0526316	0	12	0	1	14	0.0714286	2	12	0.166667	|	0	9	0	0	12	0
chr1	180100615	+	A	chr1:180100615	Cdc42bpa	LTR	Intron	NMD_transcript_variant	0	0	-	-	-	-	-1.55662	0.0181	0.0533	0.534	|	2.22543	0.0225	0.00481	0.524	|	1	22	0.0454545	1	15	0.0666667	1	20	0.05	0	13	0	1	14	0.0714286	1	12	0.0833333	|	1	9	0.111111	0	11	0
chr1	181940859	-	T	chr1:181940859	Enah	SINE	Intron	non_coding_transcript_variant	0	0	181939935	924	downstream	intronic	-2.38742	0.00333	0.0174	0.43	|	0.245655	0.00481	0.00405	0.939	|	3	29	0.103448	0	5	0	2	39	0.0512821	0	14	0	0	20	0	1	27	0.037037	|	0	14	0	0	11	0
chr1	181940868	-	T	chr1:181940868	Enah	SINE	Intron	non_coding_transcript_variant	0	0	-	-	-	-	-1.26529	0.00425	0.0102	0.663	|	-2.35296	0.001	0.00511	0.423	|	1	26	0.0384615	0	5	0	1	36	0.0277778	0	13	0	0	19	0	2	26	0.0769231	|	0	15	0	0	9	0
chr1	181944848	-	T	chr1:181944848	Enah	SINE	Intron	non_coding_transcript_variant	0	0	-	-	-	-	-0.194988	0.00437	0.005	0.954	|	0.371826	0.0055	0.00425	0.914	|	0	13	0	0	11	0	3	24	0.125	0	14	0	0	15	0	1	12	0.0833333	|	0	7	0	1	13	0.0769231
chr1	182322601	-	T	chr1:182322601	Fbxo28	SINE	Intron	NMD_transcript_variant	0	0	-	-	-	-	-0.333333	0.0209	0.0263	0.924	|	-2.35296	0.001	0.00511	0.423	|	3	11	0.272727	0	13	0	1	15	0.0666667	1	11	0.0909091	1	10	0.1	0	9	0	|	0	7	0	0	8	0
chr1	182322631	-	T	chr1:182322631	Fbxo28	SINE	Intron	NMD_transcript_variant	0	0	-	-	-	-	-4.54057	0.00481	0.112	0.179	|	3.05636	0.222	0.0267	0.337	|	2	12	0.166667	2	14	0.142857	1	17	0.0588235	0	10	0	1	9	0.111111	0	15	0	|	2	7	0.285714	0	10	0
chr1	182322645	-	T	chr1:182322645	Fbxo28	SINE	Intron	NMD_transcript_variant	0	0	-	-	-	-	-2.05281	0.001	0.00415	0.423	|	3.84642	0.0144	0.001	0.185	|	1	14	0.0714286	0	19	0	0	16	0	0	12	0	0	10	0	0	16	0	|	0	8	0	0	11	0
chr1	182337153	-	T	chr1:182337153	Fbxo28	.	Intron	NMD_transcript_variant	0	0	-	-	-	-	2.07228	0.0202	0.00481	0.545	|	-0.771991	0.0177	0.0302	0.823	|	1	9	0.111111	0	8	0	0	16	0	1	11	0.0909091	0	13	0	1	11	0.0909091	|	4	23	0.173913	0	14	0
chr1	184901589	-	T	chr1:184901589	Mark1	SINE	Intron	intron_variant	0	0	-	-	-	-	-0.0331786	0.00322	0.00329	0.99	|	-2.59526	0.00804	0.0486	0.222	|	0	39	0	0	17	0	1	28	0.0357143	0	28	0	1	30	0.0333333	0	31	0	|	1	45	0.0222222	2	31	0.0645161
chr1	184901633	-	T	chr1:184901633	Mark1	SINE	Intron	intron_variant	1	1	-	-	-	-	0.163635	0.0697	0.0622	0.844	|	-1.48475	0.0423	0.118	0.0768	|	1	35	0.0285714	1	19	0.0526316	4	25	0.16	2	26	0.0769231	2	26	0.0769231	2	35	0.0571429	|	3	50	0.06	5	32	0.15625
chr1	184904227	-	T	chr1:184904227	Mark1	SINE	Intron	intron_variant	1	1	-	-	-	-	-2.10094	0.001	0.00429	0.423	|	0.269582	0.0221	0.0184	0.411	|	0	37	0	3	38	0.0789474	0	58	0	0	54	0	0	51	0	0	45	0	|	1	68	0.0147059	1	61	0.0163934
chr1	184904233	-	T	chr1:184904233	Mark1	SINE	Intron	intron_variant	1	1	-	-	-	-	-0.379168	0.00283	0.00368	0.883	|	0.093762	0.00954	0.00894	0.97	|	0	37	0	2	40	0.05	0	58	0	0	54	0	0	53	0	1	44	0.0227273	|	1	70	0.0142857	3	60	0.05
chr1	184904290	-	T	chr1:184904290	Mark1	SINE	Intron	intron_variant	1	1	-	-	-	-	-4.49326	0.00441	0.0993	0.171	|	-4.61614	0.00327	0.0803	0.113	|	2	19	0.105263	2	20	0.1	4	43	0.0930233	0	27	0	0	31	0	3	35	0.0857143	|	3	47	0.0638298	3	37	0.0810811
chr1	187298859	+	A	chr1:187298859	Gpatch2	SINE	Intron	non_coding_transcript_variant	0	0	-	-	-	-	0.65617	0.0254	0.0161	0.842	|	-0.851662	0.0107	0.0193	0.778	|	3	35	0.0857143	2	41	0.0487805	0	33	0	0	23	0	3	25	0.12	3	22	0.136364	|	5	51	0.0980392	3	41	0.0731707
chr1	187298921	+	A	chr1:187298921	Gpatch2	SINE	Intron	non_coding_transcript_variant	0	0	-	-	-	-	4.00523	0.0592	0.00368	0.164	|	-2.23092	0.00281	0.0132	0.408	|	0	23	0	0	28	0	1	20	0.05	1	20	0.05	1	21	0.047619	2	23	0.0869565	|	1	29	0.0344828	2	30	0.0666667
chr1	187298937	+	A	chr1:187298937	Gpatch2	SINE	Intron	non_coding_transcript_variant	0	0	-	-	-	-	4.12057	0.0174	0.001	0.187	|	-0.599455	0.01	0.0152	0.829	|	0	18	0	0	23	0	0	17	0	1	20	0.05	0	20	0	2	19	0.105263	|	1	25	0.04	2	23	0.0869565
chr1	188971923	-	T	chr1:188971923	Kctd3	.	UTR	3_prime_UTR_variant	0	0	-	-	-	-	-0.9441	0.00886	0.017	0.617	|	0.429523	0.0422	0.0313	0.384	|	2	84	0.0238095	2	83	0.0240964	1	116	0.00862069	0	77	0	2	90	0.0222222	2	64	0.03125	|	2	76	0.0263158	1	45	0.0222222
chr1	191621769	+	A	chr1:191621769	Ints7	SINE	UTR	3_prime_UTR_variant	0	0	-	-	-	-	-2.93231	0.0103	0.0788	0.243	|	-4.96171	0.00454	0.142	0.149	|	7	56	0.125	2	31	0.0645161	2	33	0.0606061	3	42	0.0714286	1	65	0.0153846	0	29	0	|	6	47	0.12766	2	18	0.111111
chr1	191723466	+	A	chr1:191723466	Lpgat1	.	Intron	intron_variant	0	0	-	-	-	-	0.371826	0.0203	0.0157	0.907	|	-4.44887	0.001	0.0218	0.188	|	0	23	0	2	20	0.1	1	26	0.0384615	1	16	0.0625	0	18	0	2	15	0.133333	|	2	12	0.166667	0	6	0
chr1	191723475	+	A	chr1:191723475	Lpgat1	.	Intron	intron_variant	0	0	191722789	686	upstream	intronic	1.63711	0.0614	0.0197	0.527	|	-2.12694	0.001	0.00437	0.423	|	0	23	0	2	20	0.1	2	26	0.0769231	1	16	0.0625	1	18	0.0555556	1	15	0.0666667	|	1	12	0.0833333	0	6	0
chr1	191723476	+	A	chr1:191723476	Lpgat1	.	Intron	intron_variant	0	0	191722788	688	upstream	intronic	-1.88289	0.00405	0.015	0.542	|	0	0.001	0.001	---	|	2	23	0.0869565	0	22	0	1	26	0.0384615	0	16	0	0	18	0	1	15	0.0666667	|	0	12	0	0	6	0
chr1	191723477	+	A	chr1:191723477	Lpgat1	.	Intron	intron_variant	0	0	191722785	692	upstream	intronic	3.02709	0.0275	0.00338	0.371	|	-4.11554	0.001	0.0173	0.184	|	0	23	0	0	21	0	1	26	0.0384615	3	16	0.1875	2	18	0.111111	0	15	0	|	1	12	0.0833333	0	6	0
chr1	191766437	+	A	chr1:191766437	Gm22446,Lpgat1	SINE	Intron	regulatory_region_variant	0	0	-	-	-	-	-0.54581	0.0129	0.0189	0.86	|	2.08845	0.00425	0.001	0.423	|	0	14	0	2	11	0.181818	1	27	0.037037	1	21	0.047619	1	22	0.0454545	0	18	0	|	0	5	0	0	9	0
chr10	7597172	+	A	chr10:7597172	Lrp11	DNA	Intron	intron_variant	0	0	7597511	339	downstream	intronic	0.713393	0.0394	0.024	0.851	|	-0.0491857	0.191	0.197	0.965	|	0	10	0	1	16	0.0625	2	9	0.222222	2	7	0.285714	0	9	0	3	14	0.214286	|	1	6	0.166667	3	5	0.6
chr10	7597173	+	A	chr10:7597173	Lrp11	DNA	Intron	intron_variant	0	0	7597509	336	downstream	intronic	0.610025	0.00606	0.00397	0.862	|	2.32193	0.005	0.001	0.423	|	0	10	0	1	16	0.0625	0	9	0	0	7	0	2	9	0.222222	0	14	0	|	0	6	0	0	5	0
chr10	7597177	+	A	chr10:7597177	Lrp11	DNA	Intron	intron_variant	0	0	7597505	328	downstream	intronic	2.38614	0.00523	0.001	0.423	|	-2.88129	0.001	0.00737	0.423	|	0	10	0	0	16	0	0	9	0	0	6	0	0	9	0	2	14	0.142857	|	0	6	0	2	5	0.4
chr10	7688240	+	A	chr10:7688240	Lats1	SINE	Intron	intron_variant	0	0	-	-	-	-	0	0.001	0.001	---	|	-2.38614	0.001	0.00523	0.423	|	0	6	0	0	9	0	0	13	0	0	6	0	0	7	0	0	11	0	|	0	17	0	0	13	0
chr10	7688922	+	A	chr10:7688922	Lats1	SINE	Intron	intron_variant	0	0	-	-	-	-	0.758664	0.142	0.0838	0.079	|	-1.73165	0.0422	0.14	0.589	|	1	17	0.0588235	1	10	0.1	1	10	0.1	1	6	0.166667	2	13	0.153846	1	9	0.111111	|	1	13	0.0769231	3	12	0.25
chr10	7688991	+	A	chr10:7688991	Lats1	SINE	Intron	intron_variant	0	0	7691056	2065	downstream	intronic	2.38614	0.00523	0.001	0.423	|	-6.60774	0.001	0.0975	0.00196	|	0	12	0	0	10	0	0	15	0	0	9	0	0	8	0	1	7	0.142857	|	1	14	0.0714286	1	11	0.0909091
chr10	7930113	-	T	chr10:7930113	Tab2	SINE	Intron	intron_variant	0	0	-	-	-	-	-0.442388	0.0169	0.023	0.893	|	0.0291543	0.00397	0.00389	0.992	|	2	15	0.133333	0	18	0	2	22	0.0909091	0	20	0	2	18	0.111111	1	23	0.0434783	|	0	10	0	0	9	0
chr10	9262105	-	T	chr10:9262105	-	LINE	intergenic	intergenic_variant	0	0	-	-	-	-	1.71948	0.00329	0.001	0.423	|	2.08845	0.00425	0.001	0.423	|	0	8	0	0	19	0	0	22	0	0	27	0	1	28	0.0357143	0	19	0	|	0	11	0	0	12	0
chr10	9262120	-	T	chr10:9262120	-	LINE	intergenic	intergenic_variant	0	0	-	-	-	-	5.66136	0.0506	0.001	0.00236	|	-0.0356384	0.00415	0.00425	0.991	|	0	8	0	0	20	0	0	23	0	2	29	0.0689655	1	28	0.0357143	1	19	0.0526316	|	0	12	0	0	12	0
chr10	9451464	-	T	chr10:9451464	-	LTR	intergenic	intergenic_variant	0	0	-	-	-	-	1.326	0.411	0.164	0.297	|	0.226401	0.38	0.325	0.749	|	1	22	0.0454545	9	22	0.409091	9	38	0.236842	19	33	0.575758	9	28	0.321429	6	16	0.375	|	5	10	0.5	2	12	0.166667
chr10	9451496	-	T	chr10:9451496	-	LTR	intergenic	intergenic_variant	0	0	-	-	-	-	-0.31703	0.0142	0.0177	0.917	|	4.30307	0.0197	0.001	0.184	|	0	16	0	1	18	0.0555556	2	20	0.1	1	29	0.0344828	0	24	0	1	12	0.0833333	|	0	6	0	0	10	0
chr10	9620298	-	T	chr10:9620298	Samd5	LTR	intergenic	downstream_gene_variant	0	0	-	-	-	-	-4.278	0.00352	0.0682	0.133	|	2.16878	0.0045	0.001	0.423	|	1	25	0.04	2	14	0.142857	1	18	0.0555556	0	17	0	1	23	0.0434783	0	16	0	|	0	9	0	0	7	0
chr10	9620299	-	T	chr10:9620299	Samd5	LTR	intergenic	downstream_gene_variant	0	0	-	-	-	-	-1.98859	0.001	0.00397	0.423	|	0	0.001	0.001	---	|	0	22	0	0	14	0	1	16	0.0625	0	19	0	0	23	0	0	16	0	|	0	9	0	0	6	0
chr10	9623312	-	T	chr10:9623312	Samd5	DNA	UTR	3_prime_UTR_variant	0	0	-	-	-	-	0	0.001	0.001	---	|	-2.12694	0.001	0.00437	0.423	|	0	30	0	0	42	0	0	52	0	0	32	0	0	38	0	0	27	0	|	0	37	0	0	20	0
chr10	11173195	+	A	chr10:11173195	Shprh	SINE	Intron	non_coding_transcript_variant	0	0	11173278	83	downstream	intronic	-0.589186	0.0563	0.0847	0.568	|	0.261808	0.0189	0.0158	0.936	|	2	43	0.0465116	2	34	0.0588235	10	45	0.222222	1	40	0.025	2	32	0.0625	4	35	0.114286	|	0	29	0	5	27	0.185185
chr10	11196400	+	A	chr10:11196400	Shprh	.	Intron	non_coding_transcript_variant	0	0	-	-	-	-	2.08845	0.00425	0.001	0.423	|	2.91446	0.0306	0.00405	0.415	|	0	8	0	0	7	0	0	13	0	0	15	0	1	13	0.0769231	0	8	0	|	0	12	0	0	12	0
chr10	11199525	+	A	chr10:11199525	Shprh	LTR	Intron	non_coding_transcript_variant	0	0	-	-	-	-	0	0.001	0.001	---	|	1.75511	0.00338	0.001	0.423	|	0	17	0	0	18	0	0	16	0	0	11	0	0	20	0	0	21	0	|	0	14	0	0	11	0
chr10	11199526	+	A	chr10:11199526	Shprh	LTR	Intron	non_coding_transcript_variant	0	0	-	-	-	-	1.85782	0.00362	0.001	0.423	|	-0.275324	0.0901	0.109	0.815	|	0	17	0	0	18	0	0	16	0	0	10	0	0	20	0	1	21	0.047619	|	1	14	0.0714286	4	11	0.363636
chr10	11199538	+	A	chr10:11199538	Shprh	LTR	Intron	non_coding_transcript_variant	0	0	-	-	-	-	2.21462	0.00464	0.001	0.423	|	2.3023	0.00493	0.001	0.423	|	0	17	0	0	18	0	0	16	0	1	10	0.1	0	20	0	0	19	0	|	0	13	0	0	11	0
chr10	11199552	+	A	chr10:11199552	Shprh	LTR	Intron	non_coding_transcript_variant	0	0	-	-	-	-	1.93195	0.00382	0.001	0.423	|	3.51094	0.0114	0.001	0.184	|	0	17	0	0	17	0	0	20	0	0	12	0	0	18	0	1	18	0.0555556	|	0	12	0	0	12	0
chr10	11202809	+	A	chr10:11202809	Shprh	LTR	Intron	non_coding_transcript_variant	0	0	-	-	-	-	-2.54795	0.001	0.00585	0.423	|	-2.21462	0.001	0.00464	0.423	|	0	10	0	0	5	0	1	5	0.2	0	20	0	0	11	0	0	5	0	|	0	15	0	0	11	0
chr10	11202812	+	A	chr10:11202812	Shprh	LTR	Intron	non_coding_transcript_variant	0	0	-	-	-	-	-2.21462	0.001	0.00464	0.423	|	-2.13561	0.00415	0.0182	0.507	|	1	10	0.1	0	5	0	0	5	0	0	20	0	0	11	0	0	5	0	|	1	15	0.0666667	1	11	0.0909091
chr10	11296325	+	A	chr10:11296325	Fbxo30	SINE	UTR	3_prime_UTR_variant	0	0	-	-	-	-	-2.21582	0.0292	0.136	0.468	|	4.8739	0.161	0.0055	0.184	|	3	18	0.166667	3	21	0.142857	2	19	0.105263	6	20	0.3	0	23	0	1	12	0.0833333	|	0	19	0	2	12	0.166667
chr10	11296374	+	A	chr10:11296374	Fbxo30	SINE	UTR	3_prime_UTR_variant	0	0	-	-	-	-	-3.0657	0.00347	0.029	0.373	|	-2.36706	0.00405	0.0209	0.482	|	0	14	0	3	23	0.130435	3	16	0.1875	0	22	0	0	18	0	1	24	0.0416667	|	4	19	0.210526	0	12	0
chr10	11296383	+	A	chr10:11296383	Fbxo30	SINE	UTR	3_prime_UTR_variant	0	0	-	-	-	-	0.360307	0.0234	0.0182	0.914	|	3.97719	0.0157	0.001	0.184	|	2	15	0.133333	1	22	0.0454545	0	18	0	0	20	0	2	18	0.111111	3	26	0.115385	|	0	17	0	0	12	0
chr10	13985239	+	A	chr10:13985239	Gm26835,Hivep2	SINE	Intron	regulatory_region_variant	0	0	-	-	-	-	0	0.001	0.001	---	|	4.00823	0.0161	0.001	0.184	|	0	20	0	0	14	0	0	20	0	0	9	0	0	13	0	0	11	0	|	0	10	0	0	5	0
chr10	19865664	-	T	chr10:19865664	Pex7	.	Intron	non_coding_transcript_variant	0	0	19866296	632	upstream	intronic	-2.21462	0.001	0.00464	0.423	|	-2.27126	0.00606	0.0292	0.567	|	0	13	0	0	9	0	1	10	0.1	0	9	0	0	7	0	0	9	0	|	2	5	0.4	0	8	0
chr10	20318502	+	A	chr10:20318502	Bclaf1	.	Intron	non_coding_transcript_exon_variant	1	1	-	-	-	-	0.2372	0.145	0.123	0.602	|	-3.25588	0.0186	0.178	0.268	|	6	50	0.12	6	50	0.12	12	93	0.129032	21	85	0.247059	8	74	0.108108	9	79	0.113924	|	9	45	0.2	5	21	0.238095
chr10	20318626	+	A	chr10:20318626	Bclaf1	SINE	Intron	non_coding_transcript_exon_variant	0	0	20319765	1139	downstream	intronic	-0.679398	0.0526	0.0842	0.162	|	-0.234471	0.0133	0.0156	0.936	|	3	42	0.0714286	3	42	0.0714286	9	77	0.116883	2	58	0.0344828	4	57	0.0701754	3	50	0.06	|	0	42	0	2	27	0.0740741
chr10	20318640	+	A	chr10:20318640	Bclaf1	SINE	Intron	non_coding_transcript_exon_variant	0	0	20319737	1097	downstream	intronic	-2.83225	0.0112	0.0799	0.27	|	2.06687	0.0137	0.00327	0.465	|	3	41	0.0731707	4	40	0.1	6	86	0.0697674	5	58	0.0862069	1	61	0.0163934	0	54	0	|	0	46	0	0	28	0
chr10	20318657	+	A	chr10:20318657	Bclaf1	SINE	Intron	non_coding_transcript_exon_variant	0	0	-	-	-	-	2.57846	0.0407	0.00681	0.202	|	2.92055	0.036	0.00475	0.323	|	1	40	0.025	0	34	0	1	79	0.0126582	4	59	0.0677966	1	58	0.0172414	3	52	0.0576923	|	0	41	0	0	28	0
chr10	20318658	+	A	chr10:20318658	Bclaf1	SINE	Intron	non_coding_transcript_exon_variant	0	0	-	-	-	-	0.424036	0.0646	0.0482	0.528	|	3.99766	0.0526	0.00329	0.139	|	2	40	0.05	1	34	0.0294118	6	79	0.0759494	6	59	0.101695	2	58	0.0344828	4	52	0.0769231	|	0	41	0	0	28	0
chr10	20318670	+	A	chr10:20318670	Bclaf1	SINE	Intron	non_coding_transcript_exon_variant	0	0	20319719	1049	downstream	intronic	0.860753	0.135	0.0746	0.27	|	-0.548691	0.076	0.111	0.257	|	4	34	0.117647	1	27	0.037037	6	63	0.0952381	12	49	0.244898	6	55	0.109091	4	43	0.0930233	|	3	36	0.0833333	4	28	0.142857
chr10	20336209	+	A	chr10:20336209	Bclaf1	SINE	Intron	non_coding_transcript_variant	1	1	-	-	-	-	-2.71948	0.001	0.00659	0.423	|	-0.473821	0.00431	0.00598	0.894	|	0	9	0	0	7	0	4	14	0.285714	0	7	0	0	5	0	0	5	0	|	0	10	0	3	14	0.214286
chr10	20340927	+	A	chr10:20340927	Bclaf1	.	UTR	3_prime_UTR_variant	0	0	-	-	-	-	0.0717933	0.0185	0.0176	0.902	|	-0.10353	0.0161	0.0173	0.854	|	9	533	0.0168856	10	329	0.0303951	5	474	0.0105485	6	443	0.013544	9	545	0.0165138	12	427	0.028103	|	9	505	0.0178218	3	317	0.00946372
chr10	22721624	-	T	chr10:22721624	Tbpl1	SINE	Intron	non_coding_transcript_variant	0	0	-	-	-	-	-2.57493	0.00312	0.0186	0.393	|	0	0.001	0.001	---	|	0	30	0	1	13	0.0769231	2	24	0.0833333	1	33	0.030303	0	28	0	0	16	0	|	0	10	0	0	6	0
chr10	24879947	+	A	chr10:24879947	Med23	SINE	Intron	non_coding_transcript_variant	0	0	24882026	2079	downstream	intronic	0.583712	0.394	0.263	0.155	|	0.433723	0.258	0.191	0.729	|	4	16	0.25	3	12	0.25	7	24	0.291667	9	20	0.45	6	22	0.272727	7	14	0.5	|	2	5	0.4	2	5	0.4
chr10	24881936	+	A	chr10:24881936	Med23	SINE	Intron	non_coding_transcript_variant	0	0	24880038	1898	upstream	intronic	-0.849479	0.069	0.124	0.288	|	-3.505	0.0243	0.276	0.267	|	3	13	0.230769	2	16	0.125	2	30	0.0666667	1	26	0.0384615	2	27	0.0740741	3	26	0.115385	|	4	13	0.307692	3	11	0.272727
chr10	24881944	+	A	chr10:24881944	Med23	SINE	Intron	non_coding_transcript_variant	0	0	24880031	1913	upstream	intronic	3.73854	0.0133	0.001	0.187	|	-3.88515	0.001	0.0148	0.191	|	0	16	0	0	17	0	0	32	0	2	29	0.0689655	0	28	0	1	29	0.0344828	|	0	17	0	1	10	0.1
chr10	24882004	+	A	chr10:24882004	Med23	SINE	Intron	non_coding_transcript_variant	1	1	24879970	2034	upstream	intronic	2.38424	0.0199	0.00382	0.466	|	-0.348601	0.00315	0.00401	0.9	|	0	12	0	1	18	0.0555556	0	36	0	4	22	0.181818	0	21	0	1	23	0.0434783	|	0	13	0	0	10	0
chr10	24882013	+	A	chr10:24882013	Med23	SINE	Intron	non_coding_transcript_variant	0	0	24879961	2052	upstream	intronic	-1.93195	0.001	0.00382	0.423	|	-0.483899	0.0175	0.0245	0.884	|	0	11	0	1	18	0.0555556	0	33	0	0	22	0	0	21	0	0	23	0	|	0	11	0	1	8	0.125
chr10	24882014	+	A	chr10:24882014	Med23	SINE	Intron	non_coding_transcript_variant	0	0	24879961	2053	upstream	intronic	2.22452	0.0178	0.00382	0.483	|	-4.28137	0.001	0.0194	0.206	|	0	11	0	1	18	0.0555556	0	33	0	1	23	0.0434783	0	21	0	3	23	0.130435	|	0	11	0	2	8	0.25
chr10	28099526	+	A	chr10:28099526	Ptprk	SINE	Intron	non_coding_transcript_variant	0	0	28099954	428	downstream	intronic	0.49131	0.0274	0.0195	0.841	|	2.70094	0.0829	0.0127	0.277	|	2	25	0.08	0	47	0	5	54	0.0925926	2	80	0.025	1	54	0.0185185	2	45	0.0444444	|	1	21	0.047619	0	17	0
chr10	28099544	+	A	chr10:28099544	Ptprk	.	Intron	non_coding_transcript_variant	0	0	28099921	377	downstream	intronic	-0.546067	0.0488	0.0713	0.493	|	3.8123	0.0557	0.00397	0.192	|	2	30	0.0666667	2	46	0.0434783	7	56	0.125	6	79	0.0759494	4	58	0.0689655	1	45	0.0222222	|	0	22	0	0	20	0
chr10	28099602	+	A	chr10:28099602	Ptprk	.	Intron	non_coding_transcript_variant	0	0	-	-	-	-	-0.509594	0.13	0.185	0.142	|	1.77998	0.137	0.0398	0.578	|	8	33	0.242424	8	54	0.148148	9	51	0.176471	8	78	0.102564	7	52	0.134615	7	44	0.159091	|	0	28	0	4	15	0.266667
chr10	28099837	+	A	chr10:28099837	Ptprk	.	Intron	non_coding_transcript_variant	0	0	-	-	-	-	-0.0969671	0.426	0.455	0.802	|	1.16181	0.354	0.158	0.314	|	12	35	0.342857	23	47	0.489362	18	32	0.5625	21	42	0.5	27	50	0.54	8	28	0.285714	|	2	8	0.25	1	21	0.047619
chr10	28099838	+	A	chr10:28099838	Ptprk	.	Intron	non_coding_transcript_variant	0	0	-	-	-	-	-0.0597015	0.379	0.395	0.684	|	0.00668198	0.215	0.214	0.987	|	14	35	0.4	21	47	0.446809	11	32	0.34375	15	43	0.348837	21	50	0.42	10	27	0.37037	|	2	8	0.25	3	21	0.142857
chr10	28099839	+	A	chr10:28099839	Ptprk	.	Intron	non_coding_transcript_variant	0	0	-	-	-	-	0.240222	0.109	0.0921	0.789	|	2.98802	0.117	0.0147	0.275	|	3	35	0.0857143	5	47	0.106383	3	35	0.0857143	6	43	0.139535	12	50	0.24	1	26	0.0384615	|	1	9	0.111111	0	21	0
chr10	28115229	+	A	chr10:28115229	Ptprk	SINE	Intron	non_coding_transcript_variant	0	0	-	-	-	-	-1.67053	0.001	0.00318	0.423	|	-0.0291543	0.00389	0.00397	0.992	|	0	18	0	0	14	0	1	31	0.0322581	0	26	0	0	15	0	0	17	0	|	0	6	0	0	6	0
chr10	28116214	+	A	chr10:28116214	Ptprk	SINE	Intron	non_coding_transcript_variant	0	0	-	-	-	-	0.169097	0.29	0.258	0.791	|	0.923129	0.398	0.21	0.29	|	4	10	0.4	5	14	0.357143	3	25	0.12	5	18	0.277778	7	21	0.333333	5	19	0.263158	|	1	10	0.1	2	10	0.2
chr10	28399847	+	A	chr10:28399847	Ptprk	LTR	Intron	non_coding_transcript_variant	0	0	-	-	-	-	2.29401	0.183	0.0374	0.479	|	-0.522375	0.126	0.182	0.578	|	6	15	0.4	0	19	0	3	23	0.130435	7	26	0.269231	4	25	0.16	3	21	0.142857	|	4	18	0.222222	2	13	0.153846
chr10	28399878	+	A	chr10:28399878	Ptprk	LTR	Intron	non_coding_transcript_variant	0	0	-	-	-	-	-0.886321	0.0146	0.027	0.788	|	2.05281	0.00415	0.001	0.423	|	2	16	0.125	3	19	0.157895	0	19	0	1	20	0.05	0	28	0	1	16	0.0625	|	0	16	0	0	9	0
chr10	28399977	+	A	chr10:28399977	Ptprk	LTR	Intron	non_coding_transcript_variant	0	0	-	-	-	-	0.192901	0.0296	0.0259	0.958	|	-0.0589593	0.0202	0.021	0.986	|	2	15	0.133333	3	23	0.130435	0	41	0	0	8	0	2	28	0.0714286	4	11	0.363636	|	1	14	0.0714286	0	5	0
chr10	28400659	+	A	chr10:28400659	Ptprk	LTR	Intron	non_coding_transcript_variant	0	0	28400050	609	upstream	intronic	-2.37736	0.00318	0.0165	0.418	|	-0.780181	0.0137	0.0235	0.806	|	0	13	0	1	17	0.0588235	3	39	0.0769231	1	31	0.0322581	0	24	0	0	10	0	|	2	14	0.142857	0	23	0
chr10	29160230	+	A	chr10:29160230	Soga3	.	Intron	non_coding_transcript_variant	0	0	29160763	533	downstream	intronic	-1.93195	0.001	0.00382	0.423	|	-0.175669	0.0118	0.0133	0.949	|	0	15	0	0	15	0	1	18	0.0555556	0	17	0	0	32	0	0	11	0	|	1	19	0.0526316	0	15	0
chr10	29160231	+	A	chr10:29160231	Soga3	.	Intron	non_coding_transcript_variant	0	0	29160762	531	downstream	intronic	-2.35296	0.00315	0.0161	0.418	|	-0.186476	0.00415	0.00472	0.954	|	1	15	0.0666667	0	15	0	1	16	0.0625	0	17	0	1	32	0.03125	0	11	0	|	2	19	0.105263	0	15	0
chr10	29160233	+	A	chr10:29160233	Soga3	.	Intron	non_coding_transcript_variant	0	0	29160760	527	downstream	intronic	-1.10914	0.0124	0.0267	0.731	|	-0.047479	0.0219	0.0226	0.989	|	2	15	0.133333	0	14	0	2	14	0.142857	1	17	0.0588235	1	31	0.0322581	0	11	0	|	0	18	0	2	15	0.133333
chr10	29160240	+	A	chr10:29160240	Soga3	.	Intron	non_coding_transcript_variant	0	0	29160753	513	downstream	intronic	-2.59862	0.0049	0.0297	0.484	|	0.363694	0.119	0.0921	0.693	|	2	18	0.111111	0	15	0	4	17	0.235294	0	15	0	4	34	0.117647	0	10	0	|	1	20	0.05	3	16	0.1875
chr10	29160241	+	A	chr10:29160241	Soga3	.	Intron	non_coding_transcript_variant	0	0	29160752	511	downstream	intronic	1.88129	0.0181	0.0049	0.578	|	2.04811	0.0152	0.00368	0.507	|	0	18	0	0	15	0	2	17	0.117647	0	15	0	2	34	0.0588235	1	10	0.1	|	1	20	0.05	0	16	0
chr10	29160242	+	A	chr10:29160242	Soga3	.	Intron	non_coding_transcript_variant	0	0	29160751	509	downstream	intronic	2.54795	0.00585	0.001	0.423	|	0.941013	0.0264	0.0138	0.69	|	0	18	0	0	15	0	0	17	0	3	15	0.2	0	33	0	0	10	0	|	0	20	0	2	16	0.125
chr10	29160246	+	A	chr10:29160246	Soga3	.	Intron	non_coding_transcript_variant	0	0	29160747	501	downstream	intronic	-2.16325	0.0263	0.118	0.467	|	1.35544	0.0471	0.0184	0.592	|	2	18	0.111111	2	16	0.125	2	17	0.117647	1	15	0.0666667	0	33	0	3	11	0.272727	|	2	20	0.1	0	16	0
chr10	29160252	+	A	chr10:29160252	Soga3	.	Intron	non_coding_transcript_variant	0	0	29160741	489	downstream	intronic	-3.11488	0.0212	0.184	0.293	|	0.166411	0.0234	0.0209	0.961	|	4	19	0.210526	3	17	0.176471	3	18	0.166667	2	18	0.111111	3	35	0.0857143	0	12	0	|	0	24	0	2	18	0.111111
chr10	29160253	+	A	chr10:29160253	Soga3	.	Intron	non_coding_transcript_variant	0	0	29160740	487	downstream	intronic	0.196043	0.0206	0.018	0.952	|	2.86488	0.069	0.00947	0.218	|	2	19	0.105263	0	17	0	1	18	0.0555556	0	18	0	4	35	0.114286	1	13	0.0769231	|	1	24	0.0416667	0	18	0
chr10	29160256	+	A	chr10:29160256	Soga3	.	Intron	non_coding_transcript_variant	0	0	29160737	481	downstream	intronic	2.0146	0.0935	0.0231	0.468	|	4.82341	0.079	0.00279	0.0624	|	2	19	0.105263	0	17	0	2	17	0.117647	2	18	0.111111	3	34	0.0882353	1	12	0.0833333	|	0	23	0	0	18	0
chr10	29160265	+	A	chr10:29160265	Soga3	.	Intron	non_coding_transcript_variant	0	0	29160728	463	downstream	intronic	-1.55246	0.0133	0.0389	0.661	|	2.47644	0.0709	0.0127	0.314	|	4	17	0.235294	0	17	0	5	20	0.25	0	20	0	1	33	0.030303	1	13	0.0769231	|	1	22	0.0454545	0	18	0
chr10	29160735	+	A	chr10:29160735	Soga3	SINE	Intron	non_coding_transcript_variant	0	0	29160258	477	upstream	intronic	-1.60648	0.0055	0.0168	0.645	|	-1.98497	0.00393	0.0155	0.522	|	1	25	0.04	0	13	0	2	17	0.117647	0	17	0	0	12	0	1	6	0.166667	|	1	28	0.0357143	0	27	0
chr10	29160744	+	A	chr10:29160744	Soga3	SINE	Intron	non_coding_transcript_variant	0	0	29160250	494	upstream	intronic	-1.61677	0.0303	0.0929	0.58	|	-0.571984	0.045	0.067	0.326	|	2	24	0.0833333	2	13	0.153846	1	16	0.0625	3	18	0.166667	0	13	0	1	6	0.166667	|	3	30	0.1	1	27	0.037037
chr10	29160746	+	A	chr10:29160746	Soga3	SINE	Intron	non_coding_transcript_variant	0	0	29160249	497	upstream	intronic	2.04983	0.021	0.00507	0.562	|	-0.408033	0.07	0.0929	0.563	|	3	23	0.130435	0	13	0	0	16	0	1	18	0.0555556	0	13	0	1	6	0.166667	|	3	30	0.1	2	27	0.0740741
chr10	29160751	+	A	chr10:29160751	Soga3	.	Intron	non_coding_transcript_variant	0	0	29160242	509	upstream	intronic	-4.04789	0.001	0.0165	0.184	|	0.766663	0.0168	0.00988	0.785	|	0	21	0	1	13	0.0769231	1	17	0.0588235	0	19	0	0	13	0	0	6	0	|	0	30	0	1	28	0.0357143
chr10	29160756	+	A	chr10:29160756	Soga3	.	Intron	non_coding_transcript_variant	0	0	29160237	519	upstream	intronic	-2.53948	0.0327	0.19	0.424	|	-0.102187	0.0678	0.0728	0.896	|	8	21	0.380952	4	13	0.307692	1	17	0.0588235	4	19	0.210526	0	13	0	1	6	0.166667	|	1	30	0.0333333	3	28	0.107143
chr10	29160759	+	A	chr10:29160759	Soga3	.	Intron	non_coding_transcript_variant	0	0	29160233	526	upstream	intronic	-2.19116	0.001	0.00457	0.423	|	-0.0791664	0.0131	0.0138	0.978	|	2	21	0.0952381	0	13	0	0	17	0	0	19	0	0	13	0	0	6	0	|	1	30	0.0333333	0	27	0
chr10	29228095	+	A	chr10:29228095	9330159F19Rik	SINE	UTR	3_prime_UTR_variant	0	0	-	-	-	-	0.834784	0.0768	0.0431	0.2	|	0.379701	0.0814	0.0626	0.388	|	4	171	0.0233918	9	137	0.0656934	8	154	0.0519481	13	148	0.0878378	14	181	0.0773481	9	135	0.0666667	|	12	122	0.0983607	4	81	0.0493827
chr10	31947869	-	T	chr10:31947869	Nkain2	.	Intron	intron_variant	1	1	-	-	-	-	0.0520397	0.00306	0.00295	0.983	|	0.440643	0.005	0.00368	0.89	|	0	35	0	0	37	0	1	39	0.025641	0	45	0	0	44	0	1	35	0.0285714	|	0	15	0	0	24	0
chr10	32134931	-	T	chr10:32134931	Nkain2	SINE	Intron	intron_variant	0	0	32135517	586	upstream	intronic	-0.237702	0.339	0.399	0.304	|	1	0.562	0.281	0.183	|	9	24	0.375	8	18	0.444444	13	34	0.382353	9	26	0.346154	7	17	0.411765	3	11	0.272727	|	2	9	0.222222	9	18	0.5
chr10	32134937	-	T	chr10:32134937	Nkain2	SINE	Intron	intron_variant	0	0	32135514	577	upstream	intronic	-2.05007	0.0177	0.0733	0.44	|	3.03318	0.162	0.0198	0.296	|	1	22	0.0454545	1	18	0.0555556	5	32	0.15625	1	24	0.0416667	2	15	0.133333	0	11	0	|	1	8	0.125	1	16	0.0625
chr10	32246315	-	T	chr10:32246315	Nkain2	LINE	Intron	intron_variant	0	0	-	-	-	-	-0.786034	0.0901	0.155	0.389	|	0.226794	0.159	0.136	0.555	|	5	32	0.15625	5	26	0.192308	5	40	0.125	1	30	0.0333333	4	26	0.153846	2	14	0.142857	|	1	10	0.1	2	16	0.125
chr10	32506118	-	T	chr10:32506118	Nkain2	LINE	Intron	intron_variant	0	0	-	-	-	-	0	0.001	0.001	---	|	0	0.001	0.001	---	|	0	13	0	0	15	0	0	19	0	0	12	0	0	10	0	0	16	0	|	0	9	0	0	7	0
chr10	32506124	-	T	chr10:32506124	Nkain2	LINE	Intron	intron_variant	0	0	-	-	-	-	0	0.001	0.001	---	|	-2.15798	0.005	0.0223	0.543	|	0	13	0	0	15	0	0	18	0	0	12	0	0	9	0	0	15	0	|	0	9	0	1	6	0.166667
chr10	32527033	-	T	chr10:32527033	Nkain2	LINE	Intron	intron_variant	0	0	32528950	1917	upstream	Intron	-2.08845	0.001	0.00425	0.423	|	0	0.001	0.001	---	|	1	13	0.0769231	0	11	0	0	5	0	0	8	0	0	5	0	0	10	0	|	0	8	0	0	9	0
chr10	32527053	-	T	chr10:32527053	Nkain2	LINE	Intron	intron_variant	0	0	32525091	1962	downstream	intronic	-2.16878	0.001	0.0045	0.423	|	0.302297	0.005	0.00405	0.927	|	1	11	0.0909091	0	10	0	0	10	0	0	11	0	0	6	0	0	10	0	|	0	9	0	0	11	0
chr10	32538599	-	T	chr10:32538599	Nkain2	LTR	Intron	intron_variant	0	0	-	-	-	-	-0.114884	0.146	0.158	0.745	|	2.02826	0.101	0.0249	0.48	|	5	40	0.125	5	26	0.192308	7	43	0.162791	10	59	0.169492	3	30	0.1	6	33	0.181818	|	2	13	0.153846	0	21	0
chr10	32538626	-	T	chr10:32538626	Nkain2	LTR	Intron	intron_variant	0	0	-	-	-	-	2.07968	0.0446	0.0106	0.348	|	1.59862	0.0147	0.00487	0.624	|	1	37	0.027027	1	23	0.0434783	0	42	0	3	52	0.0576923	1	26	0.0384615	1	25	0.04	|	0	10	0	0	20	0
chr10	32540801	-	T	chr10:32540801	Nkain2	LTR	Intron	intron_variant	0	0	32538583	2218	downstream	intronic	1.36277	0.325	0.126	0.127	|	-0.854764	0.115	0.208	0.163	|	6	22	0.272727	2	24	0.0833333	4	45	0.0888889	9	33	0.272727	9	25	0.36	7	20	0.35	|	6	20	0.3	3	19	0.157895
chr10	32540819	-	T	chr10:32540819	Nkain2	LTR	Intron	intron_variant	0	0	-	-	-	-	0.131426	0.00306	0.00279	0.955	|	-3.75128	0.001	0.0135	0.184	|	0	27	0	0	28	0	1	46	0.0217391	1	35	0.0285714	0	28	0	0	22	0	|	1	21	0.047619	0	22	0
chr10	32543020	-	T	chr10:32543020	Nkain2	.	Intron	intron_variant	0	0	32543864	844	upstream	intronic	-0.47384	0.173	0.241	0.524	|	-1.045	0.118	0.243	0.259	|	8	17	0.470588	4	15	0.266667	2	18	0.111111	2	14	0.142857	3	19	0.157895	3	13	0.230769	|	3	11	0.272727	2	16	0.125
chr10	32543022	-	T	chr10:32543022	Nkain2	.	Intron	intron_variant	0	0	32543863	841	upstream	intronic	-2.75228	0.0159	0.107	0.302	|	0.179145	0.024	0.0212	0.958	|	2	17	0.117647	1	15	0.0666667	3	19	0.157895	0	14	0	1	19	0.0526316	1	13	0.0769231	|	1	11	0.0909091	0	16	0
chr10	32543025	-	T	chr10:32543025	Nkain2	.	Intron	intron_variant	0	0	32543859	834	upstream	intronic	-0.216501	0.243	0.282	0.532	|	1.15798	0.0836	0.0375	0.702	|	5	17	0.294118	3	15	0.2	8	21	0.380952	3	15	0.2	5	20	0.25	4	14	0.285714	|	3	12	0.25	0	16	0
chr10	32543031	-	T	chr10:32543031	Nkain2	.	Intron	intron_variant	0	0	32543853	822	upstream	intronic	1.96093	0.0146	0.00375	0.511	|	1.51598	0.018	0.0063	0.679	|	1	19	0.0526316	0	15	0	0	23	0	0	18	0	1	23	0.0434783	1	14	0.0714286	|	3	12	0.25	0	16	0
chr10	32543905	-	T	chr10:32543905	Nkain2	.	Intron	intron_variant	0	0	-	-	-	-	-2.21343	0.0153	0.0712	0.387	|	0	0.00459	0.00459	1	|	3	28	0.107143	1	29	0.0344828	4	41	0.097561	0	29	0	4	41	0.097561	1	27	0.037037	|	0	17	0	0	9	0
chr10	32543919	-	T	chr10:32543919	Nkain2	.	Intron	intron_variant	0	0	-	-	-	-	0.420138	0.0301	0.0225	0.908	|	-0.317565	0.00405	0.00505	0.923	|	0	29	0	5	33	0.151515	3	40	0.075	10	29	0.344828	3	38	0.0789474	0	28	0	|	0	14	0	0	9	0
chr10	32575267	-	T	chr10:32575267	Nkain2	.	Intron	intron_variant	0	0	32576449	1182	upstream	intronic	-1.32521	0.00352	0.00881	0.611	|	-2.32467	0.0045	0.0225	0.499	|	1	34	0.0294118	0	29	0	1	43	0.0232558	1	23	0.0434783	0	27	0	0	17	0	|	0	20	0	2	14	0.142857
chr10	32575272	-	T	chr10:32575272	Nkain2	.	Intron	intron_variant	0	0	32576440	1168	upstream	intronic	3.69207	0.0769	0.00595	0.286	|	-0.467616	0.107	0.147	0.453	|	0	30	0	0	26	0	8	38	0.210526	2	22	0.0909091	1	25	0.04	2	16	0.125	|	5	20	0.25	2	12	0.166667
chr10	32575273	-	T	chr10:32575273	Nkain2	.	Intron	intron_variant	0	0	32576439	1166	upstream	intronic	-0.0833261	0.00357	0.00378	0.976	|	-6.7822	0.001	0.11	0.00213	|	0	30	0	0	24	0	2	37	0.0540541	1	22	0.0454545	0	25	0	0	16	0	|	2	20	0.1	2	12	0.166667
chr10	32575280	-	T	chr10:32575280	Nkain2	DNA	Intron	intron_variant	0	0	32576432	1152	upstream	intronic	-0.273997	0.207	0.25	0.642	|	0.0604735	0.432	0.415	0.952	|	4	24	0.166667	4	20	0.2	16	34	0.470588	5	21	0.238095	6	23	0.26087	2	14	0.142857	|	10	18	0.555556	10	12	0.833333
chr10	32575293	-	T	chr10:32575293	Nkain2	DNA	Intron	intron_variant	0	0	32576418	1125	upstream	intronic	-2.49627	0.00472	0.0266	0.492	|	-2.45333	0.0218	0.12	0.387	|	2	28	0.0714286	0	19	0	9	34	0.264706	2	19	0.105263	0	23	0	0	16	0	|	4	17	0.235294	1	11	0.0909091
chr10	32575303	-	T	chr10:32575303	Nkain2	DNA	Intron	intron_variant	0	0	32576409	1106	upstream	intronic	-2.14049	0.001	0.00441	0.423	|	-3.83371	0.001	0.0143	0.185	|	0	28	0	0	19	0	3	35	0.0857143	0	14	0	0	21	0	0	16	0	|	1	15	0.0666667	0	9	0
chr10	32575304	-	T	chr10:32575304	Nkain2	DNA	Intron	intron_variant	0	0	32576408	1104	upstream	intronic	-0.194988	0.00457	0.00523	0.955	|	-4.99168	0.00585	0.186	0.179	|	0	28	0	0	19	0	5	35	0.142857	0	14	0	2	21	0.0952381	0	16	0	|	4	15	0.266667	5	9	0.555556
chr10	32575306	-	T	chr10:32575306	Nkain2	DNA	Intron	intron_variant	0	0	32576406	1100	upstream	intronic	-4.21079	0.001	0.0185	0.196	|	-5.136	0.00464	0.163	0.138	|	1	27	0.037037	0	19	0	6	35	0.171429	0	14	0	0	21	0	0	16	0	|	2	15	0.133333	3	8	0.375
chr10	32575312	-	T	chr10:32575312	Nkain2	DNA	Intron	intron_variant	0	0	32576400	1088	upstream	intronic	-1.45745	0.0227	0.0625	0.593	|	-2.45145	0.0281	0.154	0.418	|	1	27	0.037037	1	19	0.0526316	4	32	0.125	0	11	0	3	17	0.176471	1	15	0.0666667	|	2	15	0.133333	1	5	0.2
chr10	32575313	-	T	chr10:32575313	Nkain2	DNA	Intron	intron_variant	0	0	32576400	1087	upstream	intronic	0.0310365	0.00405	0.00397	0.992	|	-4.80441	0.00481	0.134	0.166	|	0	27	0	0	19	0	2	32	0.0625	0	11	0	0	17	0	1	15	0.0666667	|	2	15	0.133333	1	5	0.2
chr10	32575396	-	T	chr10:32575396	Nkain2	.	Intron	intron_variant	0	0	32576316	920	upstream	intronic	2.7254	0.14	0.0212	0.367	|	0	0.00567	0.00567	1	|	0	18	0	4	15	0.266667	1	28	0.0357143	1	12	0.0833333	2	11	0.181818	2	11	0.181818	|	0	6	0	0	5	0
chr10	32576365	-	T	chr10:32576365	Nkain2	.	Intron	intron_variant	0	0	-	-	-	-	-1.27883	0.00382	0.00926	0.639	|	6.15983	0.0715	0.001	0.00211	|	1	42	0.0238095	1	30	0.0333333	0	41	0	1	18	0.0555556	0	26	0	0	28	0	|	0	12	0	0	5	0
chr10	32576369	-	T	chr10:32576369	Nkain2	.	Intron	intron_variant	0	0	-	-	-	-	-1.90876	0.0142	0.0533	0.427	|	1.40512	0.0146	0.0055	0.678	|	2	43	0.0465116	2	30	0.0666667	2	41	0.0487805	0	17	0	1	25	0.04	2	28	0.0714286	|	2	12	0.166667	0	5	0
chr10	32576372	-	T	chr10:32576372	Nkain2	.	Intron	intron_variant	0	0	32575341	1031	downstream	intronic	0.66569	0.269	0.17	0.0224	|	1.79864	0.113	0.0326	0.561	|	6	42	0.142857	6	30	0.2	7	41	0.170732	5	17	0.294118	6	25	0.24	8	29	0.275862	|	5	12	0.416667	0	5	0
chr10	32576376	-	T	chr10:32576376	Nkain2	.	Intron	intron_variant	0	0	32575336	1040	downstream	intronic	-2.33345	0.0229	0.115	0.437	|	1.38614	0.0792	0.0303	0.634	|	4	43	0.0930233	5	31	0.16129	4	39	0.102564	5	16	0.3125	1	26	0.0384615	0	30	0	|	2	12	0.166667	1	6	0.166667
chr10	32576382	-	T	chr10:32576382	Nkain2	.	Intron	intron_variant	0	0	32575330	1052	downstream	intronic	0.0865889	0.0768	0.0723	0.918	|	-1.12968	0.0131	0.0288	0.744	|	2	42	0.047619	5	30	0.166667	2	42	0.047619	2	17	0.117647	1	26	0.0384615	3	30	0.1	|	6	12	0.5	0	7	0
chr10	32576387	-	T	chr10:32576387	Nkain2	.	Intron	intron_variant	0	0	32575325	1062	downstream	intronic	-2.03653	0.0155	0.0635	0.429	|	-3.96973	0.001	0.0157	0.185	|	1	44	0.0227273	3	31	0.0967742	5	43	0.116279	2	18	0.111111	0	26	0	1	30	0.0333333	|	1	13	0.0769231	0	7	0
chr10	32576388	-	T	chr10:32576388	Nkain2	.	Intron	intron_variant	0	0	32575324	1064	downstream	intronic	-0.135542	0.0152	0.0167	0.965	|	3.53194	0.062	0.00536	0.282	|	0	44	0	3	30	0.1	2	43	0.0465116	2	19	0.105263	0	26	0	1	30	0.0333333	|	2	13	0.153846	0	7	0
chr10	32576401	-	T	chr10:32576401	Nkain2	.	Intron	intron_variant	0	0	32575311	1090	downstream	intronic	-0.586326	0.087	0.131	0.381	|	-3.07345	0.0189	0.159	0.286	|	4	44	0.0909091	8	32	0.25	5	51	0.0980392	3	21	0.142857	2	28	0.0714286	2	31	0.0645161	|	2	13	0.153846	2	8	0.25
chr10	32576445	-	T	chr10:32576445	Nkain2	.	Intron	intron_variant	0	0	32575267	1178	downstream	intronic	2.35478	0.0136	0.00266	0.385	|	-0.489828	0.00382	0.00536	0.882	|	0	40	0	0	35	0	1	53	0.0188679	2	24	0.0833333	0	28	0	1	33	0.030303	|	0	14	0	2	13	0.153846
chr10	32581507	-	T	chr10:32581507	Nkain2	SINE	Intron	intron_variant	0	0	-	-	-	-	0.145802	0.0315	0.0285	0.969	|	-0.0367276	0.0245	0.0251	0.992	|	1	13	0.0769231	0	6	0	3	10	0.3	5	20	0.25	0	12	0	2	16	0.125	|	0	8	0	1	7	0.142857
chr10	32581516	-	T	chr10:32581516	Nkain2	SINE	Intron	intron_variant	0	0	-	-	-	-	2.54312	0.137	0.0235	0.386	|	2.53843	0.027	0.00464	0.479	|	1	14	0.0714286	0	8	0	2	11	0.181818	6	25	0.24	1	14	0.0714286	3	20	0.15	|	0	10	0	0	6	0
chr10	32593204	-	T	chr10:32593204	Nkain2	LTR	Intron	intron_variant	0	0	-	-	-	-	-1.51094	0.00405	0.0116	0.604	|	-1.6863	0.0055	0.0177	0.629	|	1	24	0.0416667	0	32	0	1	27	0.037037	1	15	0.0666667	0	31	0	0	13	0	|	1	12	0.0833333	0	12	0
chr10	32593241	-	T	chr10:32593241	Nkain2	LTR	Intron	intron_variant	0	0	-	-	-	-	-2.40363	0.00393	0.0208	0.476	|	4.95876	0.14	0.0045	0.148	|	1	27	0.037037	8	33	0.242424	0	24	0	0	15	0	2	33	0.0606061	0	18	0	|	0	13	0	1	11	0.0909091
chr10	32593263	-	T	chr10:32593263	Nkain2	LTR	Intron	intron_variant	0	0	-	-	-	-	-6.2063	0.001	0.0738	0.00435	|	-1.8111	0.00659	0.0231	0.641	|	1	18	0.0555556	3	23	0.130435	1	18	0.0555556	0	14	0	0	22	0	0	14	0	|	0	11	0	2	9	0.222222
chr10	32593274	-	T	chr10:32593274	Nkain2	LTR	Intron	intron_variant	0	0	-	-	-	-	-1.93195	0.001	0.00382	0.423	|	-4.25388	0.001	0.0191	0.185	|	0	13	0	1	18	0.0555556	0	15	0	0	14	0	0	17	0	0	13	0	|	0	10	0	1	9	0.111111
chr10	32593278	-	T	chr10:32593278	Nkain2	LTR	Intron	intron_variant	0	0	-	-	-	-	-4.9341	0.00405	0.124	0.129	|	0	0.001	0.001	---	|	1	14	0.0714286	4	20	0.2	2	15	0.133333	1	15	0.0666667	0	17	0	0	13	0	|	0	9	0	0	11	0
chr10	32593300	-	T	chr10:32593300	Nkain2	LTR	Intron	intron_variant	0	0	-	-	-	-	0.04813	0.00375	0.00362	0.986	|	-0.194988	0.0216	0.0247	0.955	|	0	21	0	0	17	0	1	21	0.047619	0	16	0	1	19	0.0526316	0	20	0	|	1	11	0.0909091	2	12	0.166667
chr10	32593301	-	T	chr10:32593301	Nkain2	LTR	Intron	intron_variant	0	0	-	-	-	-	-0.0498588	0.0172	0.0178	0.987	|	-2.65526	0.001	0.0063	0.423	|	2	21	0.0952381	1	17	0.0588235	0	25	0	2	18	0.111111	0	20	0	1	22	0.0454545	|	0	11	0	3	12	0.25
chr10	32593302	-	T	chr10:32593302	Nkain2	LTR	Intron	intron_variant	0	0	-	-	-	-	-7.39437	0.001	0.168	0.00322	|	-3.10325	0.0045	0.0386	0.417	|	2	21	0.0952381	4	16	0.25	5	25	0.2	0	18	0	0	19	0	0	21	0	|	0	11	0	3	12	0.25
chr10	32594520	-	T	chr10:32594520	Nkain2	LTR	Intron	intron_variant	0	0	-	-	-	-	2.10556	0.0213	0.00495	0.546	|	-4.54872	0.001	0.0234	0.186	|	4	33	0.121212	0	18	0	0	10	0	2	23	0.0869565	0	29	0	1	9	0.111111	|	1	13	0.0769231	2	12	0.166667
chr10	32597805	-	T	chr10:32597805	Nkain2	SINE	Intron	intron_variant	0	0	-	-	-	-	-2.51376	0.00472	0.027	0.494	|	-4.58721	0.001	0.024	0.184	|	8	24	0.333333	1	17	0.0588235	0	17	0	0	30	0	0	15	0	2	19	0.105263	|	1	8	0.125	0	12	0
chr10	32606165	-	T	chr10:32606165	Nkain2	LINE	Intron	intron_variant	0	0	-	-	-	-	1.74414	0.0136	0.00405	0.562	|	0.407464	0.0055	0.00415	0.905	|	0	18	0	0	19	0	1	15	0.0666667	1	19	0.0526316	1	21	0.047619	0	12	0	|	0	8	0	1	14	0.0714286
chr10	32606170	-	T	chr10:32606170	Nkain2	LINE	Intron	intron_variant	0	0	-	-	-	-	-0.161809	0.00362	0.00405	0.956	|	0	0.00523	0.00523	1	|	0	18	0	0	20	0	1	15	0.0666667	0	19	0	1	21	0.047619	0	12	0	|	0	7	0	2	14	0.142857
chr10	32606352	-	T	chr10:32606352	Nkain2	LINE	Intron	intron_variant	0	0	32608589	2237	upstream	intronic	-2.23929	0.001	0.00472	0.423	|	-3.9944	0.001	0.0159	0.184	|	2	19	0.105263	0	22	0	0	36	0	0	20	0	0	24	0	0	12	0	|	1	19	0.0526316	1	13	0.0769231
chr10	32608611	-	T	chr10:32608611	Nkain2	LINE	Intron	intron_variant	0	0	-	-	-	-	1.98859	0.00397	0.001	0.423	|	2.01963	0.00405	0.001	0.423	|	0	11	0	0	8	0	0	15	0	1	16	0.0625	0	6	0	0	7	0	|	0	7	0	0	15	0
chr10	32622869	-	T	chr10:32622869	Nkain2	LINE	Intron	intron_variant	0	0	-	-	-	-	0.314151	0.0874	0.0703	0.703	|	2.70565	0.191	0.0292	0.387	|	1	30	0.0333333	3	25	0.12	2	23	0.0869565	1	16	0.0625	1	17	0.0588235	4	22	0.181818	|	0	5	0	2	8	0.25
chr10	32622940	-	T	chr10:32622940	Nkain2	LINE	Intron	intron_variant	0	0	-	-	-	-	-7.22445	0.001	0.15	0.00369	|	0.171524	0.00659	0.00585	0.966	|	4	16	0.25	2	13	0.153846	2	23	0.0869565	0	11	0	0	11	0	0	12	0	|	0	5	0	1	5	0.2
chr10	32622941	-	T	chr10:32622941	Nkain2	LINE	Intron	intron_variant	0	0	-	-	-	-	-2.24159	0.0045	0.0213	0.51	|	3.04063	0.0441	0.00536	0.454	|	2	16	0.125	1	13	0.0769231	0	24	0	0	11	0	1	11	0.0909091	0	13	0	|	0	5	0	0	5	0
chr10	32622950	-	T	chr10:32622950	Nkain2	LINE	Intron	intron_variant	0	0	-	-	-	-	-0.0246669	0.00464	0.00472	0.994	|	-3.16395	0.00437	0.0391	0.417	|	0	16	0	0	12	0	2	19	0.105263	1	10	0.1	0	9	0	0	12	0	|	0	5	0	3	5	0.6
chr10	32661000	-	T	chr10:32661000	Nkain2	LINE	Intron	non_coding_transcript_variant	0	0	-	-	-	-	-1.6863	0.00598	0.0193	0.644	|	0	0.001	0.001	---	|	0	5	0	2	14	0.142857	1	20	0.05	0	9	0	0	9	0	3	14	0.214286	|	0	6	0	0	10	0
chr10	32661365	-	T	chr10:32661365	Nkain2	LINE	Intron	non_coding_transcript_variant	0	0	-	-	-	-	-0.97803	0.0664	0.131	0.11	|	-0.500833	0.0922	0.13	0.147	|	2	22	0.0909091	4	29	0.137931	5	28	0.178571	3	27	0.111111	2	37	0.0540541	2	41	0.0487805	|	5	30	0.166667	2	15	0.133333
chr10	32661427	-	T	chr10:32661427	Nkain2	LINE	Intron	non_coding_transcript_variant	0	0	-	-	-	-	0.0781551	0.00389	0.00368	0.978	|	-0.180189	0.00397	0.0045	0.954	|	0	12	0	1	20	0.05	0	24	0	0	8	0	1	17	0.0588235	0	10	0	|	0	12	0	1	11	0.0909091
chr10	32664190	-	T	chr10:32664190	Nkain2	LINE	Intron	non_coding_transcript_variant	0	0	-	-	-	-	0	0.001	0.001	---	|	-2.20955	0.00312	0.0144	0.434	|	0	40	0	0	46	0	0	56	0	0	38	0	0	37	0	0	47	0	|	1	23	0.0434783	2	29	0.0689655
chr10	32664232	-	T	chr10:32664232	Nkain2	LINE	Intron	non_coding_transcript_variant	0	0	-	-	-	-	-0.597065	0.0527	0.0797	0.586	|	-0.131359	0.0191	0.0209	0.968	|	7	51	0.137255	5	43	0.116279	2	63	0.031746	4	44	0.0909091	4	46	0.0869565	1	54	0.0185185	|	0	22	0	5	39	0.128205
chr10	32664239	-	T	chr10:32664239	Nkain2	LINE	Intron	non_coding_transcript_variant	0	0	-	-	-	-	-3.67707	0.001	0.0128	0.184	|	-1.94224	0.00288	0.0111	0.451	|	2	47	0.0425532	0	38	0	3	61	0.0491803	0	39	0	0	46	0	0	50	0	|	1	20	0.05	1	37	0.027027
chr10	32664286	-	T	chr10:32664286	Nkain2	LINE	Intron	non_coding_transcript_variant	0	0	-	-	-	-	0.0638985	0.013	0.0124	0.982	|	-0.82722	0.0169	0.0299	0.727	|	1	42	0.0238095	0	27	0	5	62	0.0806452	0	34	0	2	38	0.0526316	2	48	0.0416667	|	1	19	0.0526316	1	35	0.0285714
chr10	32664699	-	T	chr10:32664699	Nkain2	LINE	Intron	non_coding_transcript_variant	0	0	-	-	-	-	-0.867575	0.042	0.0767	0.13	|	0.108145	0.0954	0.0886	0.931	|	3	37	0.0810811	3	27	0.111111	2	40	0.05	1	29	0.0344828	2	31	0.0645161	1	30	0.0333333	|	1	20	0.05	3	18	0.166667
chr10	32664701	-	T	chr10:32664701	Nkain2	LINE	Intron	non_coding_transcript_variant	0	0	-	-	-	-	-1.51472	0.00992	0.0284	0.457	|	2.77658	0.0259	0.00378	0.416	|	1	36	0.0277778	1	29	0.0344828	1	42	0.0238095	0	31	0	1	33	0.030303	1	31	0.0322581	|	0	21	0	0	20	0
chr10	32673454	-	T	chr10:32673454	Nkain2	LINE	Intron	non_coding_transcript_variant	0	0	-	-	-	-	-2.1125	0.0029	0.0125	0.435	|	2.23929	0.00472	0.001	0.423	|	3	39	0.0769231	0	25	0	1	39	0.025641	0	23	0	1	41	0.0243902	0	18	0	|	0	15	0	0	16	0
chr10	32673506	-	T	chr10:32673506	Nkain2	LINE	Intron	non_coding_transcript_variant	0	0	32673523	17	upstream	Intron	-3.69752	0.00401	0.052	0.202	|	4.10808	0.0172	0.001	0.184	|	5	52	0.0961538	1	21	0.047619	2	65	0.0307692	0	38	0	0	48	0	2	31	0.0645161	|	0	11	0	0	20	0
chr10	32676199	-	T	chr10:32676199	Nkain2	SINE	Intron	non_coding_transcript_variant	0	0	-	-	-	-	-2.78905	0.0163	0.113	0.3	|	6.66349	0.101	0.001	0.00626	|	5	55	0.0909091	4	24	0.166667	5	53	0.0943396	2	33	0.0606061	0	33	0	2	28	0.0714286	|	0	17	0	0	13	0
chr10	32679557	-	T	chr10:32679557	Nkain2	SINE	Intron	non_coding_transcript_variant	0	0	-	-	-	-	-1.75672	0.0171	0.0579	0.489	|	2.59748	0.0722	0.0119	0.284	|	2	43	0.0465116	2	47	0.0425532	5	51	0.0980392	0	34	0	4	37	0.108108	2	43	0.0465116	|	0	23	0	1	19	0.0526316
chr10	32679627	-	T	chr10:32679627	Nkain2	SINE	Intron	non_coding_transcript_variant	0	0	-	-	-	-	-0.912694	0.0142	0.0267	0.7	|	0.0449765	0.0158	0.0153	0.988	|	1	36	0.0277778	1	44	0.0227273	1	33	0.030303	1	45	0.0222222	4	31	0.129032	0	34	0	|	1	16	0.0625	0	13	0
chr10	32680143	-	T	chr10:32680143	Nkain2	SINE	Intron	non_coding_transcript_variant	0	0	32679629	514	downstream	intronic	-0.551875	0.0803	0.118	0.368	|	1.98361	0.137	0.0347	0.104	|	6	44	0.136364	1	16	0.0625	9	47	0.191489	2	26	0.0769231	3	33	0.0909091	2	27	0.0740741	|	1	25	0.04	1	29	0.0344828
chr10	32680147	-	T	chr10:32680147	Nkain2	SINE	Intron	non_coding_transcript_variant	0	0	32679625	522	downstream	intronic	-0.0829883	0.0909	0.0962	0.925	|	1.41412	0.239	0.0897	0.0522	|	2	44	0.0454545	3	17	0.176471	5	45	0.111111	1	25	0.04	5	32	0.15625	3	25	0.12	|	2	27	0.0740741	3	28	0.107143
chr10	32680153	-	T	chr10:32680153	Nkain2	SINE	Intron	non_coding_transcript_variant	1	1	32679619	534	downstream	intronic	-0.0637563	0.105	0.109	0.933	|	-1.74786	0.0286	0.0961	0.549	|	2	42	0.047619	3	19	0.157895	8	46	0.173913	4	26	0.153846	2	31	0.0645161	3	26	0.115385	|	2	28	0.0714286	2	26	0.0769231
chr10	32680208	-	T	chr10:32680208	Nkain2	SINE	Intron	non_coding_transcript_variant	0	0	-	-	-	-	0.964427	0.0524	0.0268	0.208	|	2.36635	0.0577	0.0112	0.312	|	2	53	0.0377358	1	31	0.0322581	1	63	0.015873	2	36	0.0555556	1	36	0.0277778	4	43	0.0930233	|	0	23	0	1	21	0.047619
chr10	32680250	-	T	chr10:32680250	Nkain2	SINE	Intron	non_coding_transcript_variant	1	1	-	-	-	-	-0.140345	0.801	0.883	0.126	|	0.0233312	0.854	0.84	0.767	|	57	60	0.95	32	38	0.842105	49	57	0.859649	36	42	0.857143	34	44	0.772727	38	49	0.77551	|	15	18	0.833333	15	19	0.789474
chr10	32712424	-	T	chr10:32712424	Nkain2	LINE	Intron	non_coding_transcript_variant	0	0	-	-	-	-	0.0506677	0.16	0.155	0.951	|	1.06913	0.236	0.113	0.325	|	5	30	0.166667	5	15	0.333333	2	30	0.0666667	7	27	0.259259	2	18	0.111111	2	14	0.142857	|	1	12	0.0833333	4	13	0.307692
chr10	32712425	-	T	chr10:32712425	Nkain2	LINE	Intron	non_coding_transcript_variant	0	0	-	-	-	-	-1.60245	0.0298	0.0905	0.592	|	-1.94413	0.0368	0.142	0.536	|	1	30	0.0333333	5	15	0.333333	2	30	0.0666667	5	27	0.185185	0	18	0	2	14	0.142857	|	1	12	0.0833333	4	13	0.307692
chr10	32712456	-	T	chr10:32712456	Nkain2	LINE	Intron	non_coding_transcript_variant	0	0	-	-	-	-	-0.468939	0.0197	0.0272	0.892	|	0.579707	0.0366	0.0245	0.877	|	3	33	0.0909091	4	18	0.222222	0	36	0	4	35	0.114286	0	27	0	1	15	0.0666667	|	2	13	0.153846	0	15	0
chr10	32712501	-	T	chr10:32712501	Nkain2	LINE	Intron	non_coding_transcript_variant	0	0	-	-	-	-	-2.15701	0.0182	0.0813	0.416	|	1.3676	0.209	0.0809	0.0179	|	1	30	0.0333333	3	18	0.166667	3	31	0.0967742	3	33	0.0909091	0	26	0	1	15	0.0666667	|	1	14	0.0714286	1	10	0.1
chr10	32756845	-	T	chr10:32756845	Nkain2	SINE	Intron	non_coding_transcript_variant	0	0	-	-	-	-	-1.07726	0.0334	0.0705	0.196	|	0.124799	0.0042	0.00385	0.967	|	2	34	0.0588235	5	48	0.104167	4	70	0.0571429	3	77	0.038961	1	64	0.015625	3	49	0.0612245	|	0	17	0	0	23	0
chr10	32756849	-	T	chr10:32756849	Nkain2	SINE	Intron	non_coding_transcript_variant	0	0	-	-	-	-	-0.444215	0.0274	0.0373	0.648	|	-0.265176	0.014	0.0168	0.929	|	3	34	0.0882353	1	48	0.0208333	2	71	0.028169	5	76	0.0657895	1	64	0.015625	1	50	0.02	|	0	18	0	2	24	0.0833333
chr10	32756898	-	T	chr10:32756898	Nkain2	SINE	Intron	non_coding_transcript_variant	0	0	-	-	-	-	1.61653	0.0958	0.0312	0.584	|	-2.71358	0.0157	0.103	0.324	|	0	44	0	10	60	0.166667	15	82	0.182927	13	94	0.138298	8	64	0.125	3	59	0.0508475	|	2	21	0.0952381	5	32	0.15625
chr10	32762443	-	T	chr10:32762443	Nkain2	SINE	Intron	non_coding_transcript_variant	0	0	-	-	-	-	1.98574	0.0904	0.0228	0.473	|	-4.53655	0.001	0.0232	0.188	|	2	21	0.0952381	1	8	0.125	0	23	0	1	16	0.0625	1	13	0.0769231	2	13	0.153846	|	3	16	0.1875	1	15	0.0666667
chr10	32764433	-	T	chr10:32764433	Nkain2	LINE	Intron	non_coding_transcript_variant	0	0	-	-	-	-	3.42208	0.0107	0.001	0.184	|	2.14412	0.0166	0.00375	0.486	|	0	21	0	0	31	0	0	28	0	0	22	0	1	29	0.0344828	1	28	0.0357143	|	1	19	0.0526316	0	20	0
chr10	32772357	-	T	chr10:32772357	Nkain2	SINE	Intron	non_coding_transcript_variant	0	0	-	-	-	-	-1.11305	0.00315	0.00681	0.634	|	-0.107309	0.00385	0.00415	0.972	|	0	46	0	1	51	0.0196078	1	62	0.016129	0	51	0	0	42	0	1	32	0.03125	|	1	14	0.0714286	0	25	0
chr10	32779863	-	T	chr10:32779863	Nkain2	LINE	Intron	non_coding_transcript_variant	0	0	-	-	-	-	0.606661	0.0137	0.00899	0.819	|	-1.97953	0.00443	0.0175	0.543	|	1	27	0.037037	0	20	0	1	51	0.0196078	0	23	0	2	39	0.0512821	1	20	0.05	|	0	13	0	1	15	0.0666667
chr10	32781814	-	T	chr10:32781814	Nkain2	LINE	Intron	non_coding_transcript_variant	0	0	32784163	2349	upstream	intronic	-0.81582	0.128	0.226	0.45	|	-0.305037	0.178	0.22	0.535	|	1	12	0.0833333	4	11	0.363636	8	21	0.380952	2	14	0.142857	1	18	0.0555556	4	15	0.266667	|	6	21	0.285714	6	20	0.3
chr10	32781816	-	T	chr10:32781816	Nkain2	LINE	Intron	non_coding_transcript_variant	0	0	32784162	2346	upstream	intronic	-2.76257	0.0267	0.181	0.374	|	-3.55701	0.00405	0.0477	0.22	|	1	12	0.0833333	3	10	0.3	5	21	0.238095	1	14	0.0714286	0	18	0	4	15	0.266667	|	1	20	0.05	1	20	0.05
chr10	32781817	-	T	chr10:32781817	Nkain2	LINE	Intron	non_coding_transcript_variant	0	0	32784160	2343	upstream	intronic	-4.84642	0.00405	0.117	0.128	|	2.30713	0.023	0.00464	0.51	|	2	12	0.166667	2	10	0.2	1	21	0.047619	0	14	0	0	19	0	1	15	0.0666667	|	0	20	0	2	20	0.1
chr10	32781828	-	T	chr10:32781828	Nkain2	LINE	Intron	non_coding_transcript_variant	0	0	32784149	2321	upstream	intronic	-0.0795684	0.142	0.15	0.947	|	-1.38844	0.0281	0.0736	0.636	|	1	13	0.0769231	5	10	0.5	2	23	0.0869565	1	14	0.0714286	2	18	0.111111	5	14	0.357143	|	2	19	0.105263	2	22	0.0909091
chr10	32781840	-	T	chr10:32781840	Nkain2	LINE	Intron	non_coding_transcript_variant	0	0	32784138	2298	upstream	intronic	2.46027	0.0055	0.001	0.423	|	0.120857	0.00415	0.00382	0.968	|	0	14	0	0	11	0	0	21	0	0	11	0	0	22	0	2	12	0.166667	|	0	18	0	1	18	0.0555556
chr10	32781843	-	T	chr10:32781843	Nkain2	LINE	Intron	non_coding_transcript_variant	0	0	32784134	2291	upstream	intronic	0.29149	0.0055	0.0045	0.934	|	-2.14443	0.00415	0.0183	0.508	|	0	14	0	1	11	0.0909091	0	20	0	0	11	0	0	22	0	2	12	0.166667	|	1	18	0.0555556	2	18	0.111111
chr10	32781854	-	T	chr10:32781854	Nkain2	LINE	Intron	non_coding_transcript_variant	0	0	32784123	2269	upstream	intronic	0.115974	0.0045	0.00415	0.971	|	0.462341	0.00536	0.00389	0.889	|	1	14	0.0714286	0	11	0	0	19	0	0	11	0	0	22	0	1	11	0.0909091	|	1	17	0.0588235	0	14	0
chr10	32781937	-	T	chr10:32781937	Nkain2	LINE	Intron	non_coding_transcript_variant	0	0	-	-	-	-	-0.146858	0.00375	0.00415	0.961	|	2.29277	0.0049	0.001	0.423	|	1	14	0.0714286	0	12	0	0	27	0	0	28	0	1	19	0.0526316	0	12	0	|	0	10	0	0	16	0
chr10	32781944	-	T	chr10:32781944	Nkain2	LINE	Intron	non_coding_transcript_variant	0	0	-	-	-	-	0.756705	0.147	0.087	0.385	|	3.10796	0.355	0.0411	0.369	|	1	15	0.0666667	2	15	0.133333	2	27	0.0740741	3	29	0.103448	7	19	0.368421	1	12	0.0833333	|	4	10	0.4	0	17	0
chr10	32781972	-	T	chr10:32781972	Nkain2	LINE	Intron	non_coding_transcript_variant	0	0	32784043	2071	upstream	intronic	0.0534882	0.0049	0.00472	0.987	|	-0.464106	0.00362	0.005	0.884	|	0	13	0	2	19	0.105263	0	27	0	0	32	0	2	17	0.117647	0	13	0	|	0	12	0	0	17	0
chr10	32781978	-	T	chr10:32781978	Nkain2	LINE	Intron	non_coding_transcript_variant	0	0	32779916	2062	downstream	Intron	0.291029	0.0182	0.0149	0.924	|	-0.0483501	0.0152	0.0157	0.987	|	0	12	0	1	21	0.047619	2	29	0.0689655	4	35	0.114286	1	19	0.0526316	0	13	0	|	1	13	0.0769231	1	20	0.05
chr10	32781979	-	T	chr10:32781979	Nkain2	LINE	Intron	non_coding_transcript_variant	0	0	-	-	-	-	-0.340253	0.0113	0.0143	0.904	|	1.79361	0.00347	0.001	0.423	|	0	12	0	2	23	0.0869565	1	30	0.0333333	1	35	0.0285714	1	20	0.05	0	13	0	|	0	14	0	0	21	0
chr10	32781980	-	T	chr10:32781980	Nkain2	LINE	Intron	non_coding_transcript_variant	0	0	32784034	2054	upstream	intronic	-1.95242	0.00531	0.0206	0.582	|	1.79361	0.00347	0.001	0.423	|	0	12	0	3	23	0.130435	2	30	0.0666667	0	35	0	3	20	0.15	0	13	0	|	0	14	0	0	21	0
chr10	32781992	-	T	chr10:32781992	Nkain2	LINE	Intron	non_coding_transcript_variant	0	0	-	-	-	-	-3.74371	0.001	0.0134	0.185	|	-1.57262	0.0045	0.0134	0.613	|	1	16	0.0625	1	26	0.0384615	0	41	0	0	44	0	0	22	0	0	17	0	|	1	19	0.0526316	0	24	0
chr10	32798049	-	T	chr10:32798049	Nkain2	LINE	Intron	non_coding_transcript_variant	0	0	-	-	-	-	1.29401	0.0252	0.0103	0.577	|	-4.01529	0.001	0.0162	0.186	|	0	41	0	4	40	0.1	1	92	0.0108696	4	65	0.0615385	1	60	0.0166667	1	64	0.015625	|	0	21	0	2	22	0.0909091
chr10	32825808	-	T	chr10:32825808	Nkain2	LINE	Intron	non_coding_transcript_variant	0	0	-	-	-	-	-0.0418436	0.00941	0.00969	0.987	|	5.13392	0.0351	0.001	0.00595	|	2	50	0.04	1	44	0.0227273	0	57	0	1	48	0.0208333	2	50	0.04	0	30	0	|	0	39	0	0	23	0
chr10	32850888	-	T	chr10:32850888	Nkain2	LINE	Intron	non_coding_transcript_variant	0	0	-	-	-	-	-2.82679	0.001	0.00709	0.423	|	1.33265	0.0155	0.00617	0.708	|	0	8	0	5	14	0.357143	0	16	0	0	16	0	0	12	0	0	8	0	|	0	7	0	4	17	0.235294
chr10	32850936	-	T	chr10:32850936	Nkain2	LINE	Intron	non_coding_transcript_variant	0	0	-	-	-	-	-2.08845	0.001	0.00425	0.423	|	0.333333	0.00481	0.00382	0.916	|	0	10	0	0	14	0	1	13	0.0769231	0	11	0	0	9	0	0	9	0	|	0	5	0	1	18	0.0555556
chr10	32850949	-	T	chr10:32850949	Nkain2	LINE	Intron	non_coding_transcript_variant	0	0	-	-	-	-	-2.08845	0.001	0.00425	0.423	|	5.25388	0.141	0.00368	0.0928	|	0	8	0	0	12	0	1	13	0.0769231	0	14	0	0	8	0	0	8	0	|	0	6	0	1	20	0.05
chr10	32850952	-	T	chr10:32850952	Nkain2	LINE	Intron	non_coding_transcript_variant	0	0	-	-	-	-	-1.89346	0.005	0.0186	0.579	|	-2.26529	0.001	0.00481	0.423	|	0	8	0	1	12	0.0833333	1	13	0.0769231	0	12	0	0	7	0	1	8	0.125	|	0	5	0	2	18	0.111111
chr10	32857036	-	T	chr10:32857036	Nkain2	LINE	Intron	non_coding_transcript_variant	0	0	-	-	-	-	-0.615999	0.00333	0.00511	0.844	|	0.677474	0.0283	0.0177	0.843	|	2	15	0.133333	0	16	0	0	18	0	0	14	0	1	27	0.037037	0	12	0	|	0	7	0	1	10	0.1
chr10	32866654	-	T	chr10:32866654	Nkain2	LINE	Intron	non_coding_transcript_variant	0	0	-	-	-	-	1.95944	0.00389	0.001	0.423	|	2.2695	0.0938	0.0194	0.403	|	0	16	0	0	21	0	0	20	0	0	27	0	0	14	0	1	17	0.0588235	|	1	16	0.0625	0	25	0
chr10	39460472	+	A	chr10:39460472	Fyn	SINE	Intron	intron_variant	0	0	-	-	-	-	1.7568	0.0152	0.0045	0.581	|	1.79361	0.00347	0.001	0.423	|	0	16	0	2	22	0.0909091	0	18	0	1	15	0.0666667	1	19	0.0526316	0	16	0	|	0	6	0	0	9	0
chr10	39677003	-	T	chr10:39677003	E130307A14Rik	LTR	Intron	non_coding_transcript_variant	0	0	-	-	-	-	-0.127602	0.161	0.176	0.822	|	-0.686812	0.164	0.264	0.146	|	5	21	0.238095	2	17	0.117647	6	31	0.193548	7	26	0.269231	6	37	0.162162	2	21	0.0952381	|	4	11	0.363636	2	7	0.285714
chr10	39677004	-	T	chr10:39677004	E130307A14Rik	LTR	Intron	non_coding_transcript_variant	0	0	-	-	-	-	1.81607	0.0161	0.00457	0.578	|	-4.46156	0.00415	0.0914	0.158	|	2	21	0.0952381	0	18	0	0	31	0	1	26	0.0384615	4	37	0.108108	0	21	0	|	1	11	0.0909091	1	7	0.142857
chr10	39677007	-	T	chr10:39677007	E130307A14Rik	LTR	Intron	non_coding_transcript_variant	0	0	-	-	-	-	1.68889	0.0129	0.00401	0.57	|	0.0790131	0.0237	0.0225	0.982	|	0	21	0	0	19	0	2	31	0.0645161	1	25	0.04	2	37	0.0540541	0	22	0	|	1	11	0.0909091	1	8	0.125
chr10	39677008	-	T	chr10:39677008	E130307A14Rik	LTR	Intron	non_coding_transcript_variant	0	0	-	-	-	-	1.91878	0.00378	0.001	0.423	|	2.10945	0.0165	0.00382	0.493	|	0	21	0	0	19	0	0	31	0	0	25	0	2	37	0.0540541	0	22	0	|	0	11	0	0	8	0
chr10	39677017	-	T	chr10:39677017	E130307A14Rik	LTR	Intron	non_coding_transcript_variant	0	0	-	-	-	-	0.0533289	0.166	0.16	0.961	|	1.84948	0.292	0.0811	0.0152	|	6	21	0.285714	2	18	0.111111	4	31	0.129032	10	23	0.434783	8	38	0.210526	1	20	0.05	|	1	13	0.0769231	1	8	0.125
chr10	39679592	-	T	chr10:39679592	E130307A14Rik	LTR	Exon	non_coding_transcript_exon_variant	0	0	-	-	-	-	-4.40577	0.001	0.0212	0.186	|	0	0.001	0.001	---	|	0	25	0	1	15	0.0666667	4	28	0.142857	0	22	0	0	13	0	0	15	0	|	0	10	0	0	6	0
chr10	39679595	-	T	chr10:39679595	E130307A14Rik	LTR	Exon	non_coding_transcript_exon_variant	0	0	-	-	-	-	-2.20064	0.0145	0.0665	0.373	|	0	0.001	0.001	---	|	1	26	0.0384615	1	14	0.0714286	3	28	0.107143	1	22	0.0454545	0	13	0	1	15	0.0666667	|	0	11	0	0	6	0
chr10	39679607	-	T	chr10:39679607	E130307A14Rik	LTR	Exon	non_coding_transcript_exon_variant	0	0	-	-	-	-	-2.26243	0.0144	0.069	0.361	|	2.26529	0.00481	0.001	0.423	|	1	27	0.037037	1	13	0.0769231	3	26	0.115385	1	21	0.047619	0	12	0	1	16	0.0625	|	0	11	0	0	6	0
chr10	39679613	-	T	chr10:39679613	E130307A14Rik	LTR	Exon	non_coding_transcript_exon_variant	0	0	-	-	-	-	-2.11368	0.0187	0.0811	0.427	|	0	0.001	0.001	---	|	4	25	0.16	1	12	0.0833333	1	25	0.04	2	19	0.105263	0	10	0	1	16	0.0625	|	0	11	0	0	5	0
chr10	39679616	-	T	chr10:39679616	E130307A14Rik	LTR	Exon	non_coding_transcript_exon_variant	0	0	-	-	-	-	-0.162865	0.0187	0.021	0.96	|	-4.25723	0.001	0.0191	0.184	|	2	25	0.08	0	12	0	3	26	0.115385	2	19	0.105263	0	10	0	1	16	0.0625	|	1	11	0.0909091	0	5	0
chr10	39679681	-	T	chr10:39679681	E130307A14Rik	LTR	Exon	non_coding_transcript_exon_variant	0	0	-	-	-	-	-1.82165	0.0198	0.0701	0.495	|	-2.11339	0.0212	0.0917	0.443	|	1	23	0.0434783	1	6	0.166667	1	21	0.047619	1	16	0.0625	1	8	0.125	0	17	0	|	1	9	0.111111	1	12	0.0833333
chr10	39681267	-	T	chr10:39681267	E130307A14Rik	LTR	Exon	non_coding_transcript_exon_variant	0	0	39680586	681	downstream	exonic	0.0766324	0.0561	0.0532	0.898	|	-1.94944	0.00415	0.016	0.539	|	2	31	0.0645161	1	22	0.0454545	2	39	0.0512821	4	36	0.111111	2	42	0.047619	1	30	0.0333333	|	0	5	0	1	9	0.111111
chr10	39681282	-	T	chr10:39681282	E130307A14Rik	LTR	Exon	non_coding_transcript_exon_variant	0	0	39680572	710	downstream	exonic	-0.315475	0.101	0.125	0.728	|	0.299541	0.0243	0.0197	0.932	|	4	26	0.153846	3	23	0.130435	4	41	0.097561	5	33	0.151515	7	36	0.194444	1	29	0.0344828	|	0	7	0	2	9	0.222222
chr10	39681289	-	T	chr10:39681289	E130307A14Rik	LTR	Exon	non_coding_transcript_exon_variant	0	0	-	-	-	-	-1.77344	0.015	0.0511	0.468	|	-0.245655	0.0168	0.0199	0.94	|	1	25	0.04	1	23	0.0434783	3	39	0.0769231	3	32	0.09375	0	33	0	1	28	0.0357143	|	0	8	0	2	9	0.222222
chr10	39681292	-	T	chr10:39681292	E130307A14Rik	LTR	Exon	non_coding_transcript_exon_variant	0	0	-	-	-	-	-0.414433	0.111	0.148	0.49	|	2.00214	0.0243	0.00606	0.599	|	5	25	0.2	3	23	0.130435	5	40	0.125	3	33	0.0909091	7	33	0.212121	2	28	0.0714286	|	0	9	0	2	9	0.222222
chr10	39693253	-	T	chr10:39693253	E130307A14Rik	SINE	Intron	non_coding_transcript_variant	0	0	39693721	468	upstream	intronic	4.80358	0.124	0.00443	0.153	|	-0.0566417	0.00481	0.005	0.987	|	0	21	0	0	10	0	2	23	0.0869565	2	22	0.0909091	2	16	0.125	2	12	0.166667	|	1	8	0.125	0	6	0
chr10	39706131	-	T	chr10:39706131	E130307A14Rik	LTR	Intron	non_coding_transcript_variant	0	0	-	-	-	-	0.0274874	0.0729	0.0715	0.947	|	-0.471679	0.00397	0.0055	0.889	|	1	16	0.0625	2	19	0.105263	2	36	0.0555556	2	19	0.105263	1	17	0.0588235	1	16	0.0625	|	2	12	0.166667	0	10	0
chr10	39706362	-	T	chr10:39706362	E130307A14Rik	LTR	Intron	non_coding_transcript_variant	0	0	-	-	-	-	2.30799	0.118	0.0237	0.44	|	1.93195	0.00382	0.001	0.423	|	0	30	0	5	17	0.294118	1	22	0.0454545	2	16	0.125	3	21	0.142857	1	11	0.0909091	|	0	7	0	0	5	0
chr10	39718349	-	T	chr10:39718349	E130307A14Rik	LTR	Intron	non_coding_transcript_variant	0	0	-	-	-	-	0.161809	0.0263	0.0235	0.964	|	-1.5298	0.00613	0.0177	0.672	|	3	11	0.272727	0	9	0	1	21	0.047619	2	11	0.181818	1	10	0.1	0	12	0	|	1	12	0.0833333	1	15	0.0666667
chr10	39718350	-	T	chr10:39718350	E130307A14Rik	LTR	Intron	non_coding_transcript_variant	0	0	-	-	-	-	-0.064215	0.0357	0.0373	0.987	|	1.52909	0.117	0.0405	0.63	|	4	11	0.363636	0	9	0	3	21	0.142857	3	12	0.25	2	11	0.181818	0	12	0	|	4	12	0.333333	3	15	0.2
chr10	39724294	-	T	chr10:39724294	E130307A14Rik	LTR	Intron	non_coding_transcript_variant	0	0	-	-	-	-	-1.63409	0.00984	0.0305	0.427	|	-2.21462	0.001	0.00464	0.423	|	1	28	0.0357143	1	38	0.0263158	1	33	0.030303	1	30	0.0333333	1	35	0.0285714	0	27	0	|	0	25	0	1	10	0.1
chr10	39724315	-	T	chr10:39724315	E130307A14Rik	LTR	Intron	non_coding_transcript_variant	0	0	-	-	-	-	1.70199	0.0137	0.0042	0.578	|	-4.54315	0.00393	0.0916	0.146	|	0	33	0	0	29	0	2	27	0.0740741	1	28	0.0357143	0	37	0	2	28	0.0714286	|	2	28	0.0714286	1	12	0.0833333
chr10	39724318	-	T	chr10:39724318	E130307A14Rik	LTR	Intron	non_coding_transcript_variant	1	1	-	-	-	-	-1.77326	0.00333	0.0114	0.512	|	-0.363399	0.00312	0.00401	0.895	|	0	31	0	1	26	0.0384615	1	26	0.0384615	1	27	0.037037	0	32	0	0	27	0	|	0	27	0	0	10	0
chr10	39802253	+	A	chr10:39802253	Rev3l	SINE	Intron	NMD_transcript_variant	0	0	39801304	949	upstream	intronic	2.26529	0.0164	0.00342	0.448	|	0	0.001	0.001	---	|	0	24	0	0	12	0	1	25	0.04	1	18	0.0555556	2	25	0.08	0	13	0	|	0	15	0	0	12	0
chr10	39853405	+	A	chr10:39853405	Rev3l	SINE	Intron	NMD_transcript_variant	0	0	-	-	-	-	0.0289785	0.144	0.141	0.967	|	2.88129	0.0281	0.00382	0.408	|	1	15	0.0666667	4	19	0.210526	4	20	0.2	3	14	0.214286	2	23	0.0869565	4	25	0.16	|	1	18	0.0555556	0	14	0
chr10	39854256	+	A	chr10:39854256	Rev3l	SINE	Intron	NMD_transcript_variant	0	0	39852424	1832	upstream	intronic	-0.0891601	0.0124	0.0132	0.974	|	0.144551	0.0187	0.0169	0.964	|	0	22	0	1	24	0.0416667	2	36	0.0555556	1	20	0.05	1	26	0.0384615	0	16	0	|	2	16	0.125	0	19	0
chr10	39854257	+	A	chr10:39854257	Rev3l	SINE	Intron	NMD_transcript_variant	0	0	39852425	1832	upstream	intronic	0.151662	0.205	0.185	0.85	|	-0.162781	0.103	0.115	0.866	|	4	22	0.181818	10	24	0.416667	3	36	0.0833333	6	20	0.3	4	26	0.153846	3	16	0.1875	|	2	16	0.125	1	19	0.0526316
chr10	39857928	+	A	chr10:39857928	Rev3l	LINE	Intron	NMD_transcript_variant	0	0	39858714	786	downstream	intronic	0.0222772	0.0148	0.0146	0.994	|	-1.85782	0.001	0.00362	0.423	|	2	27	0.0740741	0	27	0	1	24	0.0416667	3	32	0.09375	0	16	0	1	29	0.0344828	|	1	21	0.047619	0	21	0
chr10	39858728	+	A	chr10:39858728	Rev3l	LINE	Intron	NMD_transcript_variant	0	0	39857912	816	upstream	intronic	-0.483996	0.0125	0.0175	0.872	|	-0.409423	0.00365	0.00485	0.896	|	2	53	0.0377358	3	21	0.142857	0	42	0	2	35	0.0571429	0	31	0	1	29	0.0344828	|	0	20	0	0	19	0
chr10	39858729	+	A	chr10:39858729	Rev3l	LINE	Intron	NMD_transcript_variant	0	0	39857912	817	upstream	intronic	-0.648918	0.0984	0.154	0.262	|	-1.79864	0.00329	0.0115	0.507	|	9	53	0.169811	5	22	0.227273	4	42	0.0952381	5	35	0.142857	2	31	0.0645161	3	29	0.103448	|	0	20	0	1	19	0.0526316
chr10	39858730	+	A	chr10:39858730	Rev3l	LINE	Intron	NMD_transcript_variant	0	0	39857912	818	upstream	intronic	2.21129	0.132	0.0285	0.464	|	-0.602452	0.00362	0.0055	0.855	|	5	54	0.0925926	0	22	0	11	44	0.25	5	35	0.142857	7	30	0.233333	2	29	0.0689655	|	0	20	0	0	19	0
chr10	39858731	+	A	chr10:39858731	Rev3l	LINE	Intron	NMD_transcript_variant	0	0	-	-	-	-	-1.74777	0.0124	0.0416	0.44	|	-1.95738	0.00365	0.0142	0.505	|	2	56	0.0357143	1	22	0.0454545	2	45	0.0444444	2	35	0.0571429	1	30	0.0333333	0	28	0	|	1	20	0.05	0	19	0
chr10	39858732	+	A	chr10:39858732	Rev3l	LINE	Intron	NMD_transcript_variant	0	0	-	-	-	-	-0.617519	0.0458	0.0703	0.581	|	1.94826	0.0187	0.00485	0.565	|	2	57	0.0350877	5	22	0.227273	2	46	0.0434783	1	36	0.0277778	3	31	0.0967742	1	28	0.0357143	|	0	20	0	0	19	0
chr10	39858733	+	A	chr10:39858733	Rev3l	LINE	Intron	NMD_transcript_variant	0	0	39857905	828	upstream	intronic	-0.0554062	0.112	0.116	0.841	|	1.83505	0.0493	0.0138	0.436	|	5	57	0.0877193	3	22	0.136364	6	46	0.130435	5	36	0.138889	3	31	0.0967742	3	29	0.103448	|	1	21	0.047619	0	20	0
chr10	39858746	+	A	chr10:39858746	Rev3l	LINE	Intron	NMD_transcript_variant	1	1	39857897	849	upstream	Intron	-0.418824	0.0194	0.026	0.865	|	-2.22574	0.00441	0.0206	0.512	|	1	55	0.0181818	1	23	0.0434783	1	45	0.0222222	4	34	0.117647	2	32	0.0625	0	26	0	|	0	21	0	1	19	0.0526316
chr10	39872352	+	A	chr10:39872352	Rev3l	LTR	Intron	non_coding_transcript_variant	0	0	-	-	-	-	-4.3834	0.001	0.0209	0.192	|	-2.19116	0.005	0.0228	0.537	|	0	9	0	2	11	0.181818	1	20	0.05	0	19	0	0	11	0	0	14	0	|	2	14	0.142857	1	12	0.0833333
chr10	40904805	+	A	chr10:40904805	Wasf1	SINE	Intron	intron_variant	0	0	-	-	-	-	-0.684816	0.0188	0.0303	0.844	|	-2.26529	0.001	0.00481	0.423	|	0	14	0	3	25	0.12	6	26	0.230769	2	25	0.08	2	24	0.0833333	0	6	0	|	0	6	0	2	18	0.111111
chr10	40904821	+	A	chr10:40904821	Wasf1	SINE	Intron	intron_variant	0	0	40905900	1079	downstream	intronic	-3.43927	0.0173	0.188	0.243	|	-0.0790287	0.0301	0.0318	0.983	|	2	13	0.153846	4	24	0.166667	7	27	0.259259	3	24	0.125	1	24	0.0416667	0	5	0	|	0	6	0	2	17	0.117647
chr10	40904830	+	A	chr10:40904830	Wasf1	SINE	Intron	intron_variant	0	0	40905893	1063	downstream	intronic	4.02661	0.0163	0.001	0.186	|	-2.12694	0.001	0.00437	0.423	|	0	12	0	0	22	0	0	24	0	2	22	0.0909091	1	21	0.047619	0	5	0	|	0	6	0	0	17	0
chr10	42769617	+	A	chr10:42769617	Sec63	SINE	Intron	non_coding_transcript_variant	0	0	42767684	1933	upstream	intronic	0.44542	0.0148	0.0108	0.873	|	-5.21378	0.00443	0.164	0.132	|	1	28	0.0357143	0	6	0	1	28	0.0357143	1	27	0.037037	2	23	0.0869565	0	23	0	|	1	10	0.1	2	9	0.222222
chr10	42769638	+	A	chr10:42769638	Sec63	SINE	Intron	non_coding_transcript_variant	0	0	42770998	1360	downstream	intronic	-2.18884	0.00352	0.016	0.469	|	1.53165	0.0136	0.00469	0.628	|	3	28	0.107143	0	10	0	1	26	0.0384615	0	25	0	0	23	0	1	23	0.0434783	|	0	11	0	0	11	0
chr10	42769649	+	A	chr10:42769649	Sec63	SINE	Intron	non_coding_transcript_variant	0	0	-	-	-	-	-0.595669	0.0239	0.0361	0.872	|	-4.49071	0.001	0.0225	0.184	|	4	17	0.235294	2	10	0.2	0	24	0	2	20	0.1	3	22	0.136364	0	21	0	|	1	11	0.0909091	0	10	0
chr10	43144775	-	T	chr10:43144775	Sobp	SINE	Intron	intron_variant	0	0	-	-	-	-	-0.629656	0.00342	0.00529	0.844	|	2.46027	0.0055	0.001	0.423	|	0	21	0	0	11	0	4	27	0.148148	1	25	0.04	0	14	0	0	15	0	|	0	9	0	0	7	0
chr10	43144776	-	T	chr10:43144776	Sobp	SINE	Intron	intron_variant	0	0	-	-	-	-	0.308869	0.183	0.147	0.761	|	-3.30269	0.0288	0.284	0.305	|	1	21	0.047619	4	11	0.363636	5	27	0.185185	4	25	0.16	2	14	0.142857	4	15	0.266667	|	3	9	0.333333	1	6	0.166667
chr10	45458368	-	T	chr10:45458368	Lin28b	.	Intron	non_coding_transcript_exon_variant	0	0	45459710	1342	upstream	intronic	-2.38614	0.001	0.00523	0.423	|	0	0.001	0.001	---	|	1	7	0.142857	0	12	0	0	14	0	0	11	0	0	15	0	0	5	0	|	0	8	0	0	8	0
chr10	45458370	-	T	chr10:45458370	Lin28b	.	Intron	non_coding_transcript_exon_variant	0	0	45459709	1339	upstream	intronic	-4.43895	0.001	0.0217	0.186	|	0	0.001	0.001	---	|	1	7	0.142857	0	12	0	1	14	0.0714286	0	11	0	0	15	0	0	5	0	|	0	8	0	0	8	0
chr10	49244289	-	T	chr10:49244289	Grik2	.	Intron	non_coding_transcript_variant	1	1	-	-	-	-	0.160493	0.0732	0.0655	0.592	|	-0.0367525	0.0608	0.0624	0.946	|	12	132	0.0909091	6	115	0.0521739	9	152	0.0592105	9	139	0.0647482	12	143	0.0839161	7	97	0.0721649	|	7	92	0.076087	5	58	0.0862069
chr10	49244330	-	T	chr10:49244330	Grik2	.	Exon	missense_variant	1	1	-	-	-	-	-0.012313	0.57	0.575	0.933	|	-0.010937	0.58	0.584	0.95	|	115	187	0.614973	75	153	0.490196	148	235	0.629787	104	187	0.55615	131	209	0.626794	86	162	0.530864	|	87	152	0.572368	57	88	0.647727
chr10	49244334	-	T	chr10:49244334	Grik2	.	Exon	missense_variant	1	1	-	-	-	-	-0.0858387	0.05	0.0531	0.45	|	0.245726	0.0552	0.0465	0.589	|	9	189	0.047619	9	155	0.0580645	13	240	0.0541667	9	193	0.0466321	11	206	0.0533981	8	159	0.0503145	|	8	152	0.0526316	4	88	0.0454545
chr10	49244347	-	T	chr10:49244347	Grik2	.	Exon	synonymous_variant	0	0	-	-	-	-	0.0848555	0.159	0.15	0.672	|	0.236253	0.157	0.133	0.379	|	34	194	0.175258	21	177	0.118644	41	253	0.162055	32	198	0.161616	34	221	0.153846	27	167	0.161677	|	22	157	0.140127	12	112	0.107143
chr10	49248581	-	T	chr10:49248581	Grik2	LINE	Intron	non_coding_transcript_variant	1	1	-	-	-	-	-0.0900638	0.0998	0.106	0.74	|	0.580633	0.0756	0.0506	0.549	|	7	68	0.102941	4	43	0.0930233	11	88	0.125	8	62	0.129032	7	70	0.1	8	104	0.0769231	|	1	47	0.0212766	4	56	0.0714286
chr10	49248641	-	T	chr10:49248641	Grik2	LINE	Intron	non_coding_transcript_variant	1	1	-	-	-	-	-0.238424	0.338	0.399	0.121	|	-0.458044	0.225	0.309	0.388	|	45	112	0.401786	30	81	0.37037	64	150	0.426667	30	100	0.3	36	106	0.339623	52	137	0.379562	|	27	99	0.272727	21	91	0.230769
chr10	49248733	-	T	chr10:49248733	Grik2	LINE	Intron	non_coding_transcript_variant	1	1	49249902	1169	upstream	intronic	0.104202	0.0228	0.0212	0.842	|	-0.44056	0.0491	0.0666	0.056	|	3	121	0.0247934	1	85	0.0117647	4	123	0.0325203	2	70	0.0285714	2	109	0.0183486	2	89	0.0224719	|	7	100	0.07	4	71	0.056338
chr10	49249912	-	T	chr10:49249912	Grik2	LINE	Intron	non_coding_transcript_variant	1	1	49248723	1189	downstream	intronic	0.161041	0.0249	0.0223	0.692	|	1.70584	0.032	0.00982	0.41	|	1	50	0.02	1	55	0.0181818	2	66	0.030303	1	49	0.0204082	2	53	0.0377358	1	50	0.02	|	0	46	0	1	33	0.030303
chr10	49249921	-	T	chr10:49249921	Grik2	LINE	Intron	non_coding_transcript_variant	0	0	-	-	-	-	0.154889	0.00894	0.00803	0.948	|	1.70225	0.0114	0.00349	0.536	|	0	47	0	2	56	0.0357143	1	69	0.0144928	0	45	0	2	56	0.0357143	1	50	0.02	|	2	47	0.0425532	0	30	0
chr10	49249922	-	T	chr10:49249922	Grik2	LINE	Intron	non_coding_transcript_variant	1	1	-	-	-	-	1.22099	0.0362	0.0155	0.607	|	1.14832	0.0443	0.02	0.659	|	0	47	0	5	57	0.0877193	3	70	0.0428571	1	45	0.0222222	2	56	0.0357143	3	50	0.06	|	6	47	0.12766	0	29	0
chr10	49250017	-	T	chr10:49250017	Grik2	LINE	Intron	non_coding_transcript_variant	1	1	-	-	-	-	-2.40488	0.00404	0.0214	0.355	|	1.12115	0.0488	0.0224	0.145	|	1	104	0.00961538	3	86	0.0348837	4	137	0.0291971	0	68	0	0	82	0	6	91	0.0659341	|	4	115	0.0347826	1	75	0.0133333
chr10	49250040	-	T	chr10:49250040	Grik2	LINE	Intron	non_coding_transcript_variant	1	1	-	-	-	-	-0.112517	0.544	0.588	0.562	|	-0.264051	0.386	0.464	0.232	|	80	115	0.695652	53	90	0.588889	76	153	0.496732	48	83	0.578313	45	96	0.46875	60	101	0.594059	|	50	130	0.384615	42	91	0.461538
chr10	49250110	-	T	chr10:49250110	Grik2	LINE	Intron	non_coding_transcript_variant	1	1	-	-	-	-	-0.07719	0.746	0.787	0.436	|	0.0229367	0.773	0.76	0.866	|	57	71	0.802817	57	67	0.850746	77	108	0.712963	50	67	0.746269	58	82	0.707317	55	70	0.785714	|	87	107	0.813084	48	58	0.827586
chr10	49250403	-	T	chr10:49250403	Grik2	LINE	Intron	non_coding_transcript_variant	0	0	49248533	1870	downstream	intronic	-0.270177	0.154	0.185	0.769	|	-0.561818	0.191	0.282	0.179	|	20	92	0.217391	6	72	0.0833333	31	88	0.352273	17	90	0.188889	27	96	0.28125	5	73	0.0684932	|	35	113	0.309735	23	88	0.261364
chr10	49250404	-	T	chr10:49250404	Grik2	LINE	Intron	non_coding_transcript_variant	0	0	49248532	1872	downstream	intronic	0.0979788	0.0672	0.0627	0.891	|	-0.585479	0.0505	0.0758	0.464	|	6	92	0.0652174	3	72	0.0416667	8	88	0.0909091	3	90	0.0333333	13	98	0.132653	5	73	0.0684932	|	13	113	0.115044	8	87	0.091954
chr10	49250425	-	T	chr10:49250425	Grik2	LINE	Intron	non_coding_transcript_variant	0	0	49248511	1914	downstream	intronic	0.326729	0.0813	0.0648	0.378	|	-2.77545	0.0114	0.0778	0.273	|	4	78	0.0512821	6	62	0.0967742	4	73	0.0547945	7	83	0.0843373	7	93	0.0752688	6	71	0.084507	|	7	95	0.0736842	7	80	0.0875
chr10	49250442	-	T	chr10:49250442	Grik2	LINE	Intron	non_coding_transcript_variant	1	1	-	-	-	-	-0.180025	0.164	0.186	0.0967	|	-0.514425	0.16	0.229	0.325	|	13	72	0.180556	11	59	0.186441	13	68	0.191176	14	79	0.177215	15	91	0.164835	10	66	0.151515	|	13	94	0.138298	23	73	0.315068
chr10	49264698	-	T	chr10:49264698	Grik2	.	Intron	non_coding_transcript_variant	0	0	-	-	-	-	-0.309604	0.0196	0.0243	0.592	|	2.54777	0.0346	0.00592	0.239	|	4	235	0.0170213	6	194	0.0309278	7	258	0.0271318	3	197	0.0152284	3	222	0.0135135	7	192	0.0364583	|	1	200	0.005	0	135	0
chr10	49272776	-	T	chr10:49272776	Grik2	.	Exon	missense_variant	1	1	-	-	-	-	-0.0804846	0.359	0.379	0.364	|	-0.0348638	0.3	0.308	0.916	|	102	277	0.368231	78	188	0.414894	93	260	0.357692	60	173	0.346821	97	256	0.378906	70	199	0.351759	|	65	223	0.29148	43	159	0.27044
chr10	49272789	-	T	chr10:49272789	Grik2	.	Exon	missense_variant	1	1	-	-	-	-	0.0619845	0.347	0.332	0.586	|	-0.0677032	0.208	0.218	0.898	|	88	275	0.32	68	187	0.363636	90	286	0.314685	65	181	0.359116	96	257	0.373541	59	190	0.310526	|	49	238	0.205882	22	171	0.128655
chr10	49320825	-	T	chr10:49320825	Grik2	LINE	Intron	non_coding_transcript_variant	0	0	-	-	-	-	-0.23348	0.00338	0.00397	0.934	|	1.98859	0.00397	0.001	0.423	|	0	24	0	0	23	0	2	32	0.0625	1	26	0.0384615	0	18	0	0	24	0	|	0	11	0	0	14	0
chr10	49321180	-	T	chr10:49321180	Grik2	LINE	Intron	non_coding_transcript_variant	0	0	-	-	-	-	0.944778	0.00909	0.00472	0.75	|	-0.153144	0.00357	0.00397	0.958	|	0	28	0	0	34	0	4	38	0.105263	1	36	0.0277778	0	28	0	1	37	0.027027	|	0	23	0	1	16	0.0625
chr10	49474938	-	T	chr10:49474938	Grik2	LINE	Intron	intron_variant	0	0	-	-	-	-	0.389421	0.0144	0.011	0.889	|	-2.71948	0.001	0.00659	0.423	|	0	20	0	2	37	0.0540541	1	41	0.0243902	1	27	0.037037	0	17	0	2	25	0.08	|	0	12	0	0	18	0
chr10	49474943	-	T	chr10:49474943	Grik2	LINE	Intron	intron_variant	0	0	49472474	2469	downstream	intronic	2.19346	0.0971	0.0212	0.427	|	3.3888	0.06	0.00572	0.31	|	0	22	0	4	38	0.105263	4	44	0.0909091	2	28	0.0714286	1	18	0.0555556	6	26	0.230769	|	0	11	0	0	19	0
chr10	49507019	-	T	chr10:49507019	Grik2	LTR	Intron	intron_variant	0	0	49508995	1976	upstream	intronic	-1.7026	0.001	0.00325	0.423	|	-4.27609	0.001	0.0194	0.184	|	0	40	0	0	32	0	1	29	0.0344828	0	41	0	0	42	0	0	31	0	|	1	11	0.0909091	2	25	0.08
chr10	49507026	-	T	chr10:49507026	Grik2	LTR	Intron	intron_variant	0	0	49508988	1962	upstream	intronic	-2.0443	0.00303	0.0125	0.454	|	0	0.001	0.001	---	|	1	38	0.0263158	0	30	0	2	27	0.0740741	1	36	0.0277778	0	41	0	0	30	0	|	0	9	0	0	26	0
chr10	49508989	-	T	chr10:49508989	Grik2	LTR	Intron	intron_variant	0	0	49507023	1966	downstream	intronic	-3.98476	0.001	0.0158	0.184	|	-3.65912	0.001	0.0126	0.187	|	0	31	0	3	42	0.0714286	3	54	0.0555556	0	43	0	0	31	0	0	29	0	|	1	16	0.0625	0	9	0
chr10	49508994	-	T	chr10:49508994	Grik2	LTR	Intron	intron_variant	0	0	49507021	1973	downstream	intronic	1.50922	0.0114	0.00401	0.606	|	1.88129	0.00368	0.001	0.423	|	2	31	0.0645161	0	41	0	0	53	0	1	42	0.0238095	2	32	0.0625	0	29	0	|	0	18	0	0	10	0
chr10	49509077	-	T	chr10:49509077	Grik2	.	Intron	intron_variant	0	0	49506966	2111	downstream	intronic	-1.54795	0.001	0.00292	0.423	|	2.26529	0.00481	0.001	0.423	|	0	29	0	1	40	0.025	0	37	0	0	29	0	0	20	0	0	20	0	|	0	17	0	0	19	0
chr10	49509102	-	T	chr10:49509102	Grik2	.	Intron	intron_variant	0	0	-	-	-	-	-2.16878	0.001	0.0045	0.423	|	0.8325	0.0214	0.012	0.786	|	0	23	0	3	33	0.0909091	0	30	0	0	19	0	0	19	0	0	18	0	|	0	15	0	1	18	0.0555556
chr10	49604961	-	T	chr10:49604961	Grik2	LINE	Intron	intron_variant	0	0	-	-	-	-	1.56798	0.0111	0.00375	0.576	|	2.87531	0.101	0.0138	0.269	|	0	21	0	1	19	0.0526316	0	24	0	1	27	0.037037	0	22	0	1	27	0.037037	|	0	7	0	1	16	0.0625
chr10	49604976	-	T	chr10:49604976	Grik2	LINE	Intron	intron_variant	0	0	-	-	-	-	1.30402	0.0129	0.00523	0.69	|	-1.67677	0.00585	0.0187	0.641	|	0	21	0	3	21	0.142857	0	26	0	1	31	0.0322581	0	22	0	2	30	0.0666667	|	0	5	0	2	17	0.117647
chr10	49649288	-	T	chr10:49649288	Grik2	LINE	Intron	intron_variant	0	0	-	-	-	-	4.26977	0.0193	0.001	0.0011	|	1.25841	0.00797	0.00333	0.615	|	0	41	0	0	42	0	0	44	0	1	43	0.0232558	1	60	0.0166667	1	54	0.0185185	|	0	38	0	0	46	0
chr10	49649293	-	T	chr10:49649293	Grik2	LINE	Intron	intron_variant	0	0	-	-	-	-	-0.0943691	0.0426	0.0455	0.93	|	-1.5491	0.0118	0.0346	0.484	|	6	38	0.157895	1	42	0.0238095	1	40	0.025	1	41	0.0243902	3	58	0.0517241	3	49	0.0612245	|	1	37	0.027027	1	45	0.0222222
chr10	49649303	-	T	chr10:49649303	Grik2	LINE	Intron	intron_variant	0	0	-	-	-	-	-3.50563	0.001	0.0114	0.186	|	2.09931	0.0514	0.012	0.362	|	1	35	0.0285714	2	39	0.0512821	0	40	0	0	41	0	0	59	0	0	45	0	|	0	36	0	2	43	0.0465116
chr10	49649399	-	T	chr10:49649399	Grik2	LINE	Intron	intron_variant	0	0	-	-	-	-	-0.888961	0.0522	0.0966	0.314	|	0.038731	0.0163	0.0158	0.99	|	4	39	0.102564	3	31	0.0967742	3	33	0.0909091	1	34	0.0294118	1	27	0.037037	3	23	0.130435	|	3	27	0.111111	0	21	0
chr10	49649440	-	T	chr10:49649440	Grik2	LINE	Intron	intron_variant	0	0	-	-	-	-	1.99617	0.0128	0.00322	0.474	|	2.16878	0.0045	0.001	0.423	|	0	34	0	0	33	0	1	30	0.0333333	1	35	0.0285714	2	27	0.0740741	0	36	0	|	0	23	0	0	26	0
chr10	49649515	-	T	chr10:49649515	Grik2	LINE	Intron	intron_variant	0	0	-	-	-	-	1.2199	0.0357	0.0153	0.605	|	-1.82679	0.00405	0.0144	0.559	|	3	38	0.0789474	2	44	0.0454545	0	39	0	1	35	0.0285714	1	45	0.0222222	4	56	0.0714286	|	4	32	0.125	0	25	0
chr10	49653999	-	T	chr10:49653999	Grik2	LINE	Intron	intron_variant	0	0	-	-	-	-	4.79575	0.0278	0.001	0.184	|	-1.79361	0.001	0.00347	0.423	|	0	15	0	0	23	0	0	29	0	3	20	0.15	3	21	0.142857	0	23	0	|	1	24	0.0416667	0	33	0
chr10	49654012	-	T	chr10:49654012	Grik2	LINE	Intron	intron_variant	0	0	-	-	-	-	1.92942	0.0138	0.00362	0.507	|	-0.135886	0.0115	0.0127	0.96	|	0	14	0	1	21	0.047619	0	25	0	0	20	0	1	20	0.05	1	19	0.0526316	|	0	24	0	2	28	0.0714286
chr10	49654044	-	T	chr10:49654044	Grik2	LINE	Intron	intron_variant	0	0	-	-	-	-	5.94804	0.0617	0.001	0.00112	|	2.26529	0.00481	0.001	0.423	|	0	14	0	0	17	0	0	31	0	1	20	0.05	2	25	0.08	1	17	0.0588235	|	0	14	0	0	20	0
chr10	49654096	-	T	chr10:49654096	Grik2	LINE	Intron	intron_variant	0	0	-	-	-	-	-3.82679	0.001	0.0142	0.184	|	-2.51013	0.00357	0.0203	0.43	|	1	20	0.05	0	15	0	2	35	0.0571429	0	28	0	0	25	0	0	12	0	|	0	8	0	1	14	0.0714286
chr10	49654175	-	T	chr10:49654175	Grik2	LINE	Intron	intron_variant	0	0	-	-	-	-	0.080336	0.00357	0.00338	0.976	|	0.168987	0.0219	0.0195	0.959	|	0	23	0	0	11	0	1	26	0.0384615	1	22	0.0454545	0	23	0	0	9	0	|	1	9	0.111111	0	13	0
chr10	49654196	-	T	chr10:49654196	Grik2	LINE	Intron	intron_variant	0	0	-	-	-	-	2.51545	0.109	0.0191	0.359	|	-4.80792	0.001	0.028	0.184	|	0	21	0	1	11	0.0909091	2	26	0.0769231	1	17	0.0588235	4	20	0.2	1	9	0.111111	|	1	7	0.142857	0	16	0
chr10	49654256	-	T	chr10:49654256	Grik2	LINE	Intron	intron_variant	0	0	-	-	-	-	-1.59281	0.005	0.0151	0.629	|	2.03564	0.079	0.0193	0.445	|	4	53	0.0754717	0	27	0	2	44	0.0454545	3	24	0.125	0	32	0	0	24	0	|	1	14	0.0714286	2	20	0.1
chr10	49654257	-	T	chr10:49654257	Grik2	LINE	Intron	intron_variant	0	0	-	-	-	-	-1.25948	0.00454	0.0109	0.678	|	1.64781	0.0115	0.00368	0.558	|	3	53	0.0566038	0	27	0	1	44	0.0227273	0	25	0	3	32	0.09375	0	24	0	|	0	14	0	1	20	0.05
chr10	49654266	-	T	chr10:49654266	Grik2	LINE	Intron	intron_variant	0	0	-	-	-	-	-1.64875	0.0109	0.0341	0.443	|	0.194988	0.0809	0.0707	0.804	|	1	55	0.0181818	1	30	0.0333333	3	46	0.0652174	1	26	0.0384615	1	30	0.0333333	0	27	0	|	2	15	0.133333	1	18	0.0555556
chr10	49654283	-	T	chr10:49654283	Grik2	LINE	Intron	intron_variant	0	0	-	-	-	-	-2.53931	0.0131	0.0763	0.305	|	1.13206	0.0606	0.0277	0.688	|	5	56	0.0892857	2	41	0.0487805	5	49	0.102041	0	23	0	2	34	0.0588235	1	26	0.0384615	|	2	18	0.111111	4	21	0.190476
chr10	49654289	-	T	chr10:49654289	Grik2	LINE	Intron	intron_variant	0	0	-	-	-	-	0.0631258	0.0104	0.00997	0.98	|	-0.204903	0.016	0.0184	0.949	|	0	58	0	2	42	0.047619	1	48	0.0208333	0	24	0	1	34	0.0294118	1	26	0.0384615	|	2	16	0.125	1	20	0.05
chr10	49654322	-	T	chr10:49654322	Grik2	LINE	Intron	intron_variant	0	0	-	-	-	-	-2.4798	0.00318	0.0178	0.407	|	1.31306	0.0113	0.00457	0.667	|	5	57	0.0877193	3	47	0.0638298	0	48	0	0	24	0	0	34	0	1	31	0.0322581	|	2	21	0.0952381	0	19	0
chr10	49654327	-	T	chr10:49654327	Grik2	LINE	Intron	intron_variant	0	0	-	-	-	-	-3.57539	0.00322	0.0384	0.16	|	-0.318977	0.00312	0.00389	0.907	|	2	55	0.0363636	3	42	0.0714286	1	46	0.0217391	0	22	0	1	30	0.0333333	0	30	0	|	0	19	0	1	17	0.0588235
chr10	49654345	-	T	chr10:49654345	Grik2	LINE	Intron	intron_variant	0	0	-	-	-	-	-2.3696	0.0108	0.0557	0.307	|	-0.214619	0.0149	0.0173	0.945	|	9	54	0.166667	2	42	0.047619	1	46	0.0217391	1	25	0.04	1	32	0.03125	0	37	0	|	0	21	0	1	24	0.0416667
chr10	49654366	-	T	chr10:49654366	Grik2	LINE	Intron	intron_variant	0	0	-	-	-	-	-2.62968	0.0104	0.0641	0.258	|	-0.449006	0.014	0.0191	0.883	|	2	41	0.0487805	7	37	0.189189	1	35	0.0285714	0	17	0	1	31	0.0322581	1	29	0.0344828	|	2	19	0.105263	0	22	0
chr10	49654369	-	T	chr10:49654369	Grik2	LINE	Intron	intron_variant	0	0	-	-	-	-	0.103981	0.00325	0.00303	0.967	|	-2.56311	0.0146	0.086	0.32	|	1	36	0.0277778	0	36	0	0	32	0	0	16	0	1	29	0.0344828	0	29	0	|	2	21	0.0952381	1	23	0.0434783
chr10	49654415	-	T	chr10:49654415	Grik2	LINE	Intron	intron_variant	0	0	-	-	-	-	-1.81827	0.00368	0.013	0.529	|	4.03926	0.0164	0.001	0.184	|	0	21	0	1	19	0.0526316	1	24	0.0416667	0	16	0	1	20	0.05	0	21	0	|	0	26	0	0	21	0
chr10	49671792	-	T	chr10:49671792	Grik2	.	Intron	intron_variant	0	0	49672626	834	upstream	intronic	0.434952	0.00389	0.00288	0.87	|	-2.08845	0.001	0.00425	0.423	|	0	30	0	0	17	0	1	42	0.0238095	0	39	0	1	17	0.0588235	0	16	0	|	1	13	0.0769231	0	14	0
chr10	49671796	-	T	chr10:49671796	Grik2	.	Intron	intron_variant	0	0	49672621	825	upstream	intronic	-1.62376	0.00382	0.0118	0.571	|	1.86242	0.0585	0.0161	0.451	|	1	30	0.0333333	0	17	0	2	41	0.0487805	0	39	0	1	18	0.0555556	0	17	0	|	0	13	0	1	15	0.0666667
chr10	49671812	-	T	chr10:49671812	Grik2	.	Intron	intron_variant	0	0	49672605	793	upstream	intronic	-0.840161	0.239	0.427	0.0779	|	0.429162	0.499	0.371	0.109	|	11	31	0.354839	9	20	0.45	22	45	0.488889	16	49	0.326531	4	24	0.166667	4	16	0.25	|	6	13	0.461538	5	16	0.3125
chr10	49671818	-	T	chr10:49671818	Grik2	.	Intron	intron_variant	0	0	49672599	781	upstream	intronic	-0.523958	0.0833	0.12	0.371	|	-0.23348	0.14	0.165	0.733	|	2	31	0.0645161	3	20	0.15	8	45	0.177778	5	48	0.104167	2	24	0.0833333	1	15	0.0666667	|	3	14	0.214286	3	16	0.1875
chr10	49671819	-	T	chr10:49671819	Grik2	.	Intron	intron_variant	0	0	49672598	779	upstream	intronic	-0.487778	0.191	0.268	0.404	|	0.578989	0.292	0.195	0.303	|	6	32	0.1875	6	20	0.3	16	47	0.340426	5	48	0.104167	6	24	0.25	4	15	0.266667	|	3	14	0.214286	2	16	0.125
chr10	49671820	-	T	chr10:49671820	Grik2	.	Intron	intron_variant	1	1	49672597	777	upstream	intronic	-0.882657	0.0939	0.173	0.361	|	0.0085117	0.134	0.133	0.993	|	2	32	0.0625	6	20	0.3	13	47	0.276596	7	47	0.148936	2	24	0.0833333	1	15	0.0666667	|	5	14	0.357143	1	16	0.0625
chr10	49671823	-	T	chr10:49671823	Grik2	.	Intron	intron_variant	0	0	49672594	771	upstream	intronic	-0.333333	0.00277	0.00349	0.893	|	-0.54581	0.00329	0.00481	0.858	|	0	30	0	0	20	0	2	47	0.0425532	1	47	0.0212766	0	24	0	0	15	0	|	0	14	0	0	16	0
chr10	49671841	-	T	chr10:49671841	Grik2	.	Intron	intron_variant	0	0	49672577	736	upstream	intronic	0.83004	0.122	0.0684	0.4	|	2.96002	0.0407	0.00523	0.456	|	1	26	0.0384615	1	21	0.047619	7	40	0.175	9	42	0.214286	4	28	0.142857	1	17	0.0588235	|	2	14	0.142857	0	14	0
chr10	49671854	-	T	chr10:49671854	Grik2	.	Intron	intron_variant	0	0	-	-	-	-	1.55513	0.0098	0.00333	0.552	|	2.01963	0.00405	0.001	0.423	|	0	23	0	1	27	0.037037	0	44	0	1	38	0.0263158	1	28	0.0357143	0	15	0	|	0	17	0	0	15	0
chr10	49671855	-	T	chr10:49671855	Grik2	.	Intron	intron_variant	0	0	-	-	-	-	-1.35209	0.103	0.263	0.0446	|	0.050275	0.197	0.19	0.958	|	5	23	0.217391	9	27	0.333333	11	44	0.25	6	38	0.157895	3	29	0.103448	1	15	0.0666667	|	5	17	0.294118	1	16	0.0625
chr10	49671903	-	T	chr10:49671903	Grik2	LTR	Intron	intron_variant	0	0	-	-	-	-	-1.35296	0.00385	0.00984	0.626	|	1.6863	0.00322	0.001	0.423	|	0	26	0	1	25	0.04	1	42	0.0238095	2	35	0.0571429	0	33	0	0	20	0	|	0	15	0	0	11	0
chr10	49671916	-	T	chr10:49671916	Grik2	LTR	Intron	intron_variant	0	0	49672505	589	upstream	intronic	-3.96513	0.001	0.0156	0.204	|	5.49732	0.0452	0.001	0.0108	|	0	25	0	4	25	0.16	1	42	0.0238095	0	33	0	0	34	0	0	19	0	|	0	14	0	0	10	0
chr10	49671918	-	T	chr10:49671918	Grik2	LTR	Intron	intron_variant	0	0	49672508	590	upstream	intronic	-0.296339	0.014	0.0172	0.923	|	2.00386	0.00401	0.001	0.423	|	0	24	0	3	25	0.12	2	47	0.0425532	3	32	0.09375	1	34	0.0294118	0	20	0	|	0	15	0	0	8	0
chr10	49671920	-	T	chr10:49671920	Grik2	LTR	Intron	intron_variant	0	0	49672502	582	upstream	intronic	0.217184	0.0175	0.015	0.943	|	1.53046	0.0139	0.00481	0.637	|	0	24	0	2	25	0.08	2	47	0.0425532	3	33	0.0909091	2	34	0.0588235	0	23	0	|	0	15	0	1	9	0.111111
chr10	49671921	-	T	chr10:49671921	Grik2	LTR	Intron	intron_variant	0	0	49672502	581	upstream	intronic	0.405892	0.0865	0.0653	0.684	|	4.13666	0.0698	0.00397	0.164	|	2	24	0.0833333	4	26	0.153846	1	46	0.0217391	4	33	0.121212	2	34	0.0588235	2	22	0.0909091	|	1	16	0.0625	0	9	0
chr10	49671933	-	T	chr10:49671933	Grik2	LTR	Intron	intron_variant	0	0	49672490	557	upstream	intronic	-0.372917	0.242	0.313	0.412	|	1.53698	0.171	0.059	0.655	|	4	19	0.210526	9	24	0.375	16	41	0.390244	9	25	0.36	6	29	0.206897	4	21	0.190476	|	6	13	0.461538	0	8	0
chr10	49671934	-	T	chr10:49671934	Grik2	LTR	Intron	intron_variant	0	0	49671376	558	downstream	Intron	0.78506	0.0187	0.0109	0.79	|	3.76377	0.0653	0.00481	0.234	|	1	19	0.0526316	0	24	0	1	41	0.0243902	0	25	0	2	29	0.0689655	2	21	0.0952381	|	0	13	0	0	8	0
chr10	49671936	-	T	chr10:49671936	Grik2	LTR	Intron	intron_variant	0	0	-	-	-	-	-0.324208	0.161	0.202	0.664	|	1.4493	0.128	0.0468	0.657	|	4	19	0.210526	6	23	0.26087	6	40	0.15	7	25	0.28	2	29	0.0689655	5	23	0.217391	|	4	13	0.307692	0	7	0
chr10	49671954	-	T	chr10:49671954	Grik2	LTR	Intron	intron_variant	0	0	-	-	-	-	-1.9199	0.0239	0.0906	0.496	|	1.87262	0.0207	0.00567	0.605	|	1	18	0.0555556	3	23	0.130435	4	39	0.102564	5	27	0.185185	2	27	0.0740741	0	23	0	|	2	11	0.181818	0	8	0
chr10	49672493	-	T	chr10:49672493	Grik2	.	Intron	intron_variant	0	0	49671928	565	downstream	intronic	3.73202	0.0454	0.00342	0.167	|	-1.73697	0.001	0.00333	0.423	|	0	43	0	1	25	0.04	0	59	0	2	36	0.0555556	1	32	0.03125	2	37	0.0540541	|	1	27	0.037037	0	12	0
chr10	49672494	-	T	chr10:49672494	Grik2	.	Intron	intron_variant	0	0	49671927	567	downstream	intronic	-0.188532	0.003	0.00342	0.941	|	-3.64655	0.00362	0.0454	0.183	|	0	43	0	1	25	0.04	0	59	0	0	36	0	0	32	0	1	37	0.027027	|	1	27	0.037037	1	12	0.0833333
chr10	49672497	-	T	chr10:49672497	Grik2	.	Intron	intron_variant	0	0	49671925	572	downstream	intronic	3.35143	0.0354	0.00347	0.199	|	-1.55198	0.00437	0.0128	0.614	|	0	42	0	1	24	0.0416667	0	59	0	2	36	0.0555556	1	33	0.030303	1	38	0.0263158	|	2	28	0.0714286	0	12	0
chr10	49672512	-	T	chr10:49672512	Grik2	.	Intron	intron_variant	0	0	49671910	602	downstream	intronic	0.237284	0.194	0.165	0.644	|	-0.869349	0.122	0.222	0.305	|	5	45	0.111111	4	21	0.190476	11	52	0.211538	5	43	0.116279	7	30	0.233333	10	37	0.27027	|	4	31	0.129032	5	16	0.3125
chr10	49672513	-	T	chr10:49672513	Grik2	.	Intron	intron_variant	0	0	49671909	604	downstream	intronic	0.135435	0.269	0.244	0.602	|	-0.67345	0.207	0.331	0.568	|	11	45	0.244444	4	21	0.190476	16	51	0.313725	12	43	0.27907	7	30	0.233333	11	37	0.297297	|	4	32	0.125	9	16	0.5625
chr10	49672514	-	T	chr10:49672514	Grik2	.	Intron	intron_variant	0	0	-	-	-	-	0.348565	0.0501	0.0393	0.672	|	-2.36377	0.00382	0.0196	0.462	|	3	46	0.0652174	1	21	0.047619	1	51	0.0196078	1	43	0.0232558	2	30	0.0666667	3	37	0.0810811	|	0	32	0	1	16	0.0625
chr10	49672518	-	T	chr10:49672518	Grik2	.	Intron	intron_variant	0	0	-	-	-	-	-1.58336	0.022	0.0658	0.567	|	-3.89853	0.0049	0.0731	0.227	|	2	43	0.0465116	1	20	0.05	6	49	0.122449	2	42	0.047619	0	30	0	8	36	0.222222	|	1	31	0.0322581	2	16	0.125
chr10	49672520	-	T	chr10:49672520	Grik2	.	Intron	intron_variant	0	0	-	-	-	-	2.17935	0.0216	0.00477	0.529	|	-4.10074	0.00531	0.0912	0.225	|	5	46	0.108696	0	22	0	0	51	0	4	44	0.0909091	0	30	0	4	36	0.111111	|	1	32	0.03125	2	15	0.133333
chr10	49672522	-	T	chr10:49672522	Grik2	.	Intron	intron_variant	0	0	-	-	-	-	2.64445	0.0223	0.00357	0.416	|	-2.3726	0.0239	0.124	0.411	|	0	46	0	1	22	0.0454545	0	51	0	6	45	0.133333	0	30	0	3	36	0.0833333	|	2	32	0.0625	3	15	0.2
chr10	49672565	-	T	chr10:49672565	Grik2	.	Intron	intron_variant	0	0	-	-	-	-	0.178684	0.00292	0.00258	0.935	|	-2.12694	0.001	0.00437	0.423	|	0	51	0	0	29	0	1	58	0.0172414	0	56	0	1	40	0.025	0	36	0	|	0	28	0	0	23	0
chr10	49672583	-	T	chr10:49672583	Grik2	.	Intron	intron_variant	0	0	49671834	749	downstream	intronic	3.05584	0.00832	0.001	0.184	|	0.516656	0.0163	0.0114	0.859	|	0	39	0	0	27	0	0	46	0	1	47	0.0212766	1	37	0.027027	0	33	0	|	1	28	0.0357143	0	20	0
chr10	49672593	-	T	chr10:49672593	Grik2	.	Intron	intron_variant	0	0	49671825	768	downstream	intronic	3.45303	0.0356	0.00325	0.173	|	-3.19724	0.001	0.00917	0.184	|	0	44	0	1	29	0.0344828	0	51	0	3	46	0.0652174	1	36	0.0277778	1	40	0.025	|	1	36	0.0277778	0	20	0
chr10	49672604	-	T	chr10:49672604	Grik2	.	Intron	intron_variant	0	0	49671813	791	downstream	intronic	-0.514278	0.0771	0.11	0.568	|	1.56275	0.0897	0.0304	0.595	|	7	44	0.159091	4	27	0.148148	3	53	0.0566038	4	39	0.102564	1	32	0.03125	6	42	0.142857	|	6	33	0.181818	0	20	0
chr10	49672607	-	T	chr10:49672607	Grik2	.	Intron	intron_variant	0	0	49671810	797	downstream	intronic	-0.0219133	0.09	0.0914	0.978	|	0.824382	0.119	0.0669	0.383	|	2	44	0.0454545	3	28	0.107143	8	51	0.156863	6	37	0.162162	3	31	0.0967742	2	43	0.0465116	|	4	31	0.129032	2	21	0.0952381
chr10	49672622	-	T	chr10:49672622	Grik2	.	Intron	intron_variant	0	0	49671794	828	downstream	intronic	-1.02876	0.00372	0.00758	0.691	|	0.0741308	0.0141	0.0134	0.979	|	1	41	0.0243902	0	28	0	1	56	0.0178571	0	36	0	0	26	0	2	39	0.0512821	|	0	26	0	1	20	0.05
chr10	49672623	-	T	chr10:49672623	Grik2	.	Intron	intron_variant	0	0	49671794	829	downstream	intronic	1.14737	0.0878	0.0396	0.15	|	2.43561	0.0987	0.0182	0.369	|	1	41	0.0243902	1	28	0.0357143	4	56	0.0714286	3	35	0.0857143	4	26	0.153846	2	39	0.0512821	|	3	26	0.115385	1	19	0.0526316
chr10	49672629	-	T	chr10:49672629	Grik2	.	Intron	intron_variant	0	0	49671789	840	downstream	intronic	2.50819	0.0147	0.00258	0.369	|	-2.91063	0.00481	0.0361	0.327	|	0	42	0	0	29	0	1	58	0.0172414	1	35	0.0285714	3	27	0.111111	0	42	0	|	1	24	0.0416667	1	21	0.047619
chr10	49756721	-	T	chr10:49756721	Grik2	LINE	Intron	intron_variant	0	0	-	-	-	-	-0.0945977	0.00329	0.00352	0.972	|	-3.61825	0.001	0.0123	0.185	|	0	21	0	0	31	0	2	46	0.0434783	0	24	0	1	28	0.0357143	0	17	0	|	1	18	0.0555556	0	15	0
chr10	49766322	-	T	chr10:49766322	Grik2	LINE	Intron	intron_variant	0	0	-	-	-	-	4.20059	0.0538	0.00292	0.0995	|	-0.13285	0.00325	0.00357	0.96	|	0	34	0	0	27	0	1	40	0.025	2	33	0.0606061	2	20	0.1	1	39	0.025641	|	0	28	0	0	25	0
chr10	49766348	-	T	chr10:49766348	Grik2	LINE	Intron	intron_variant	0	0	-	-	-	-	1.95944	0.0153	0.00393	0.521	|	0.120857	0.00329	0.00303	0.961	|	0	31	0	0	22	0	2	33	0.0606061	2	33	0.0606061	0	18	0	2	34	0.0588235	|	0	28	0	0	23	0
chr10	49766404	-	T	chr10:49766404	Grik2	LINE	Intron	intron_variant	0	0	-	-	-	-	2.06096	0.0162	0.00389	0.509	|	0.0489471	0.00329	0.00318	0.985	|	0	23	0	0	13	0	1	17	0.0588235	1	26	0.0384615	2	18	0.111111	0	15	0	|	0	27	0	0	19	0
chr10	49766542	-	T	chr10:49766542	Grik2	LINE	Intron	intron_variant	0	0	-	-	-	-	-4.44887	0.001	0.0218	0.188	|	-0.0331786	0.00405	0.00415	0.991	|	1	16	0.0625	1	6	0.166667	0	14	0	0	7	0	0	10	0	0	13	0	|	1	14	0.0714286	0	7	0
chr10	50738195	+	A	chr10:50738195	Ascc3	.	Intron	intron_variant	0	0	-	-	-	-	-2.79361	0.00437	0.0303	0.442	|	0	0.001	0.001	---	|	3	12	0.25	0	18	0	2	18	0.111111	1	12	0.0833333	0	11	0	0	6	0	|	0	9	0	0	9	0
chr10	50738220	+	A	chr10:50738220	Ascc3	.	Intron	intron_variant	0	0	50739666	1446	downstream	intronic	0.0437482	0.267	0.259	0.952	|	1.75511	0.234	0.0693	0.628	|	5	12	0.416667	8	25	0.32	3	23	0.130435	2	14	0.142857	5	15	0.333333	2	5	0.4	|	3	9	0.333333	0	10	0
chr10	52706736	+	A	chr10:52706736	Slc35f1	LTR	Intron	intron_variant	0	0	-	-	-	-	0.138346	0.00333	0.00303	0.956	|	-1.42264	0.00412	0.011	0.624	|	1	36	0.0277778	0	32	0	0	54	0	0	63	0	1	27	0.037037	0	33	0	|	1	31	0.0322581	0	26	0
chr10	52706751	+	A	chr10:52706751	Slc35f1	LTR	Intron	intron_variant	0	0	-	-	-	-	-1.93662	0.00352	0.0135	0.502	|	-1.56013	0.00397	0.0117	0.59	|	1	30	0.0333333	0	26	0	3	41	0.0731707	0	50	0	0	18	0	1	23	0.0434783	|	1	26	0.0384615	0	25	0
chr10	52706767	+	A	chr10:52706767	Slc35f1	LTR	Intron	intron_variant	0	0	-	-	-	-	-0.245861	0.07	0.083	0.754	|	1.96826	0.13	0.0331	0.519	|	4	27	0.148148	1	21	0.047619	3	37	0.0810811	8	53	0.150943	1	20	0.05	1	22	0.0454545	|	4	25	0.16	5	22	0.227273
chr10	52706953	+	A	chr10:52706953	Slc35f1	LTR	Intron	intron_variant	0	0	-	-	-	-	-0.138762	0.0184	0.0203	0.966	|	1.73697	0.00333	0.001	0.423	|	0	25	0	3	19	0.157895	2	38	0.0526316	4	41	0.097561	0	43	0	3	47	0.0638298	|	0	7	0	0	14	0
chr10	52717584	+	A	chr10:52717584	Slc35f1	SINE	Intron	intron_variant	0	0	-	-	-	-	1.98292	0.0746	0.0189	0.45	|	-0.738812	0.0284	0.0475	0.789	|	2	29	0.0689655	0	15	0	4	41	0.097561	3	25	0.12	2	33	0.0606061	2	35	0.0571429	|	1	26	0.0384615	1	20	0.05
chr10	53368543	-	T	chr10:53368543	Cep85l	LTR	Intron	non_coding_transcript_variant	0	0	53370334	1791	upstream	intronic	0.23594	0.0427	0.0362	0.953	|	-2.0913	0.00536	0.0228	0.563	|	4	14	0.285714	2	12	0.166667	0	10	0	7	20	0.35	0	16	0	2	9	0.222222	|	2	14	0.142857	1	12	0.0833333
chr10	53370379	-	T	chr10:53370379	Cep85l	LTR	Intron	non_coding_transcript_variant	0	0	-	-	-	-	-1.81626	0.0272	0.0959	0.529	|	0.0603053	0.0273	0.0261	0.987	|	2	25	0.08	1	16	0.0625	3	17	0.176471	2	11	0.181818	1	9	0.111111	0	10	0	|	2	16	0.125	0	11	0
chr10	57507125	+	A	chr10:57507125	Hsf2	.	Intron	3_prime_UTR_variant	1	1	57507928	803	downstream	intronic	-2.08062	0.0208	0.088	0.444	|	-0.0719221	0.0698	0.0733	0.898	|	5	55	0.0909091	6	40	0.15	1	20	0.05	4	36	0.111111	3	37	0.0810811	0	36	0	|	4	41	0.097561	1	22	0.0454545
chr10	57507155	+	A	chr10:57507155	Hsf2	.	Intron	3_prime_UTR_variant	0	0	-	-	-	-	3.40577	0.0106	0.001	0.184	|	4.94361	0.0308	0.001	0.00368	|	0	49	0	0	44	0	0	27	0	0	44	0	1	30	0.0333333	1	28	0.0357143	|	0	46	0	0	25	0
chr10	57507156	+	A	chr10:57507156	Hsf2	.	Intron	3_prime_UTR_variant	1	1	-	-	-	-	2.39606	0.0647	0.0123	0.337	|	2.09401	0.0621	0.0145	0.396	|	1	49	0.0204082	4	44	0.0909091	0	27	0	5	44	0.113636	1	30	0.0333333	2	28	0.0714286	|	0	44	0	2	25	0.08
chr10	57507167	+	A	chr10:57507167	Hsf2	.	Intron	3_prime_UTR_variant	1	1	-	-	-	-	-3.6302	0.001	0.0124	0.2	|	3.7414	0.0134	0.001	0.184	|	1	49	0.0204082	4	43	0.0930233	0	32	0	0	46	0	0	24	0	0	36	0	|	0	46	0	0	26	0
chr10	57507893	+	A	chr10:57507893	Hsf2	.	Intron	intron_variant	0	0	-	-	-	-	1.97285	0.0426	0.0109	0.372	|	-0.145366	0.0112	0.0124	0.957	|	2	46	0.0434783	0	38	0	1	34	0.0294118	1	34	0.0294118	2	39	0.0512821	2	39	0.0512821	|	0	18	0	1	17	0.0588235
chr10	57507908	+	A	chr10:57507908	Hsf2	.	Intron	intron_variant	1	1	-	-	-	-	-2.85776	0.0029	0.021	0.204	|	1.44064	0.00271	0.001	0.423	|	1	52	0.0192308	1	46	0.0217391	1	45	0.0222222	1	41	0.0243902	0	49	0	0	41	0	|	0	27	0	0	22	0
chr10	57507916	+	A	chr10:57507916	Hsf2	.	Intron	intron_variant	1	1	57507140	776	upstream	intronic	0.507854	0.0183	0.0128	0.867	|	-2.27146	0.00879	0.0424	0.284	|	0	50	0	4	46	0.0869565	1	41	0.0243902	0	41	0	3	48	0.0625	4	41	0.097561	|	2	29	0.0689655	1	22	0.0454545
chr10	58410768	+	A	chr10:58410768	Lims1	SINE	Intron	intron_variant	0	0	-	-	-	-	-0.830618	0.0141	0.025	0.797	|	-1.88129	0.001	0.00368	0.423	|	2	16	0.125	0	9	0	2	16	0.125	2	30	0.0666667	1	24	0.0416667	0	12	0	|	0	10	0	0	5	0
chr10	58419625	+	A	chr10:58419625	Lims1	.	Intron	non_coding_transcript_variant	0	0	-	-	-	-	-0.133519	0.0703	0.0771	0.796	|	-1.94675	0.0045	0.0173	0.555	|	1	11	0.0909091	1	11	0.0909091	1	18	0.0555556	1	10	0.1	2	23	0.0869565	1	25	0.04	|	1	8	0.125	0	8	0
chr10	58419743	+	A	chr10:58419743	Lims1	.	Intron	non_coding_transcript_variant	0	0	58419097	646	upstream	intronic	-1.8791	0.0891	0.328	0.112	|	-3.06675	0.0322	0.27	0.345	|	5	18	0.277778	7	17	0.411765	8	26	0.307692	7	30	0.233333	1	22	0.0454545	1	15	0.0666667	|	2	18	0.111111	3	7	0.428571
chr10	58419747	+	A	chr10:58419747	Lims1	.	Intron	non_coding_transcript_variant	0	0	58419089	658	upstream	intronic	0.00160329	0.491	0.49	0.995	|	0.39864	0.495	0.375	0.301	|	7	18	0.388889	9	16	0.5625	14	26	0.538462	13	30	0.433333	10	22	0.454545	9	15	0.6	|	10	18	0.555556	2	7	0.285714
chr10	58419748	+	A	chr10:58419748	Lims1	.	Intron	non_coding_transcript_variant	0	0	58419088	660	upstream	intronic	0.0938834	0.301	0.282	0.865	|	0.223284	0.37	0.317	0.796	|	3	18	0.166667	7	16	0.4375	8	26	0.307692	6	30	0.2	7	22	0.318182	6	14	0.428571	|	6	18	0.333333	5	7	0.714286
chr10	58419756	+	A	chr10:58419756	Lims1	.	Intron	non_coding_transcript_variant	0	0	58419081	675	upstream	Intron	2.3039	0.0247	0.005	0.521	|	-4.3982	0.0055	0.116	0.213	|	2	16	0.125	0	16	0	0	25	0	3	26	0.115385	3	23	0.130435	0	13	0	|	3	16	0.1875	1	8	0.125
chr10	58423657	+	A	chr10:58423657	Lims1	.	UTR	3_prime_UTR_variant	1	1	-	-	-	-	-0.13191	0.0286	0.0314	0.824	|	-1.43608	0.0107	0.029	0.507	|	2	80	0.025	4	66	0.0606061	2	98	0.0204082	1	47	0.0212766	2	71	0.028169	2	51	0.0392157	|	1	74	0.0135135	1	40	0.025
chr10	58471519	+	A	chr10:58471519	Ranbp2	SINE	Intron	intron_variant	0	0	58471264	255	upstream	intronic	1.93195	0.00382	0.001	0.423	|	2.16878	0.0045	0.001	0.423	|	0	13	0	0	7	0	0	17	0	0	7	0	1	18	0.0555556	0	10	0	|	0	10	0	0	9	0
chr10	58471524	+	A	chr10:58471524	Ranbp2	SINE	Intron	intron_variant	0	0	58471259	265	upstream	intronic	0.500833	0.0055	0.00389	0.882	|	2.38614	0.00523	0.001	0.423	|	0	13	0	0	7	0	1	17	0.0588235	0	7	0	3	18	0.166667	0	10	0	|	0	10	0	0	9	0
chr10	58488185	+	A	chr10:58488185	Ranbp2	SINE	Intron	intron_variant	1	1	58486967	1218	upstream	intronic	4.53655	0.0232	0.001	0.19	|	0.458132	0.0291	0.0212	0.898	|	0	8	0	0	10	0	0	11	0	1	16	0.0625	0	11	0	1	5	0.2	|	1	21	0.047619	0	11	0
chr10	58488205	+	A	chr10:58488205	Ranbp2	SINE	Intron	intron_variant	0	0	58486949	1256	upstream	intronic	-0.294841	0.00347	0.00425	0.92	|	0.138346	0.0223	0.0203	0.967	|	0	11	0	1	13	0.0769231	0	12	0	1	24	0.0416667	0	11	0	0	10	0	|	2	20	0.1	1	12	0.0833333
chr10	58488206	+	A	chr10:58488206	Ranbp2	SINE	Intron	intron_variant	1	1	58486948	1258	upstream	intronic	-0.70851	0.00347	0.00567	0.83	|	-4.34156	0.00464	0.0941	0.189	|	2	11	0.181818	0	13	0	0	12	0	1	24	0.0416667	0	11	0	0	10	0	|	2	20	0.1	1	12	0.0833333
chr10	58488211	+	A	chr10:58488211	Ranbp2	SINE	Intron	intron_variant	0	0	58486943	1268	upstream	intronic	1.54795	0.0161	0.0055	0.654	|	-2.15161	0.00464	0.0206	0.527	|	0	10	0	0	13	0	2	12	0.166667	1	24	0.0416667	0	11	0	1	10	0.1	|	2	19	0.105263	1	12	0.0833333
chr10	58488214	+	A	chr10:58488214	Ranbp2	SINE	Intron	intron_variant	1	1	58486940	1274	upstream	intronic	1.93195	0.0167	0.00437	0.551	|	-2.10094	0.00481	0.0206	0.541	|	0	10	0	1	12	0.0833333	0	12	0	1	24	0.0416667	0	11	0	1	9	0.111111	|	2	19	0.105263	1	12	0.0833333
chr10	58488274	+	A	chr10:58488274	Ranbp2	SINE	Intron	intron_variant	0	0	58486874	1400	upstream	intronic	-4.30307	0.001	0.0197	0.184	|	-2.21462	0.001	0.00464	0.423	|	0	8	0	1	10	0.1	1	13	0.0769231	0	20	0	0	12	0	0	7	0	|	0	20	0	1	10	0.1
chr10	58488283	+	A	chr10:58488283	Ranbp2	SINE	Intron	intron_variant	0	0	58486865	1418	upstream	intronic	-4.98476	0.001	0.0317	0.184	|	-3.56298	0.0165	0.195	0.217	|	0	8	0	2	9	0.222222	2	14	0.142857	0	17	0	0	12	0	0	8	0	|	4	21	0.190476	3	9	0.333333
chr10	58488284	+	A	chr10:58488284	Ranbp2	SINE	Intron	intron_variant	1	1	58486864	1420	upstream	intronic	4.28137	0.0194	0.001	0.186	|	-0.176838	0.00425	0.00481	0.957	|	0	8	0	0	9	0	0	14	0	1	17	0.0588235	0	12	0	1	8	0.125	|	0	21	0	1	9	0.111111
chr10	59985231	-	T	chr10:59985231	Anapc16	SINE	intergenic	downstream_gene_variant	1	1	-	-	-	-	2.01963	0.00405	0.001	0.423	|	0.236831	0.0202	0.0172	0.941	|	0	8	0	0	12	0	0	17	0	0	12	0	0	5	0	1	15	0.0666667	|	2	22	0.0909091	0	7	0
chr10	59985345	-	T	chr10:59985345	Anapc16	SINE	intergenic	downstream_gene_variant	1	1	-	-	-	-	2.46027	0.0055	0.001	0.423	|	-6.33204	0.001	0.0806	0.00175	|	0	7	0	0	9	0	0	5	0	0	10	0	0	8	0	2	12	0.166667	|	1	17	0.0588235	1	9	0.111111
chr10	59985383	-	T	chr10:59985383	Anapc16	SINE	intergenic	downstream_gene_variant	0	0	59986665	1282	upstream	undefined	-0.259203	0.0255	0.0306	0.943	|	-2.47658	0.001	0.00557	0.423	|	1	5	0.2	0	10	0	1	7	0.142857	0	8	0	2	12	0.166667	1	10	0.1	|	0	13	0	0	10	0
chr10	60133278	+	A	chr10:60133278	Spock2	.	UTR	3_prime_UTR_variant	0	0	-	-	-	-	-0.647449	0.0173	0.027	0.506	|	-0.546312	0.0224	0.0327	0.537	|	9	121	0.0743802	2	109	0.0183486	2	138	0.0144928	2	142	0.0140845	4	123	0.0325203	1	89	0.011236	|	5	90	0.0555556	1	71	0.0140845
chr10	60133279	+	A	chr10:60133279	Spock2	.	UTR	3_prime_UTR_variant	0	0	-	-	-	-	0.849361	0.0268	0.0149	0.231	|	0.763373	0.035	0.0206	0.313	|	1	122	0.00819672	3	108	0.0277778	2	138	0.0144928	5	142	0.0352113	3	123	0.0243902	2	89	0.0224719	|	1	89	0.011236	2	71	0.028169
chr10	61099884	-	T	chr10:61099884	Sgpl1	.	UTR	3_prime_UTR_variant	0	0	-	-	-	-	3.31651	0.0283	0.00284	0.157	|	0.282606	0.0361	0.0296	0.743	|	2	87	0.0229885	0	63	0	0	106	0	2	74	0.027027	2	87	0.0229885	3	82	0.0365854	|	2	79	0.0253165	2	47	0.0425532
chr10	61433462	-	T	chr10:61433462	Eif4ebp2	.	UTR	3_prime_UTR_variant	0	0	-	-	-	-	0	0.001	0.001	---	|	-2.38614	0.001	0.00523	0.423	|	0	25	0	0	17	0	0	31	0	0	21	0	0	21	0	0	5	0	|	0	21	0	2	14	0.142857
chr10	62789097	-	T	chr10:62789097	Ccar1	SINE	Intron	non_coding_transcript_variant	1	1	62790733	1636	upstream	intronic	2.04329	0.0178	0.00431	0.529	|	-1.95749	0.0237	0.0919	0.482	|	0	23	0	0	17	0	2	25	0.08	0	24	0	1	17	0.0588235	2	21	0.0952381	|	3	26	0.115385	2	22	0.0909091
chr10	62789105	-	T	chr10:62789105	Ccar1	SINE	Intron	non_coding_transcript_variant	0	0	62790725	1620	upstream	intronic	4.15738	0.0858	0.00481	0.203	|	-1.52145	0.0254	0.073	0.583	|	0	23	0	0	15	0	3	27	0.111111	1	24	0.0416667	3	18	0.166667	2	22	0.0909091	|	3	26	0.115385	1	22	0.0454545
chr10	62789147	-	T	chr10:62789147	Ccar1	SINE	Intron	non_coding_transcript_variant	0	0	-	-	-	-	1.92313	0.0166	0.00437	0.55	|	-2.14592	0.00415	0.0184	0.507	|	0	16	0	1	12	0.0833333	0	20	0	1	20	0.05	1	11	0.0909091	0	15	0	|	1	17	0.0588235	2	19	0.105263
chr10	62789961	-	T	chr10:62789961	Ccar1	SINE	Intron	non_coding_transcript_variant	0	0	62790668	707	upstream	intronic	-2.65592	0.014	0.0879	0.308	|	0.292705	0.0236	0.0193	0.933	|	1	21	0.047619	4	14	0.285714	1	20	0.05	0	16	0	1	32	0.03125	2	23	0.0869565	|	1	37	0.027027	0	20	0
chr10	62789962	-	T	chr10:62789962	Ccar1	SINE	Intron	non_coding_transcript_variant	0	0	62790660	698	upstream	intronic	-0.238736	0.00352	0.00415	0.935	|	-2.81965	0.00295	0.0208	0.367	|	0	21	0	1	14	0.0714286	0	20	0	0	16	0	0	32	0	1	23	0.0434783	|	2	38	0.0526316	0	21	0
chr10	62809763	-	T	chr10:62809763	Tet1	SINE	UTR	3_prime_UTR_variant	1	1	62810055	292	upstream	UTR	1.01065	0.0968	0.0481	0.129	|	-0.840529	0.0314	0.0562	0.772	|	3	64	0.046875	4	65	0.0615385	2	52	0.0384615	7	58	0.12069	8	57	0.140351	3	56	0.0535714	|	2	45	0.0444444	1	37	0.027027
chr10	67103646	+	A	chr10:67103646	Jmjd1c	SINE	intergenic	non_coding_transcript_variant	0	0	-	-	-	-	-1.50946	0.00437	0.0124	0.619	|	-4.50739	0.001	0.0227	0.184	|	0	19	0	1	20	0.05	1	26	0.0384615	2	24	0.0833333	0	9	0	0	24	0	|	1	10	0.1	0	5	0
chr10	67163489	+	A	chr10:67163489	Jmjd1c	SINE	Intron	non_coding_transcript_variant	0	0	-	-	-	-	-3.81324	0.001	0.0141	0.184	|	-1.99726	0.00415	0.0166	0.528	|	1	18	0.0555556	0	17	0	1	20	0.05	0	18	0	0	20	0	0	26	0	|	1	11	0.0909091	0	16	0
chr10	67166749	+	A	chr10:67166749	Jmjd1c	SINE	Intron	non_coding_transcript_variant	0	0	-	-	-	-	0.245655	0.00437	0.00368	0.935	|	2.18358	0.0146	0.00322	0.444	|	1	20	0.05	0	10	0	0	16	0	0	6	0	0	13	0	1	12	0.0833333	|	0	14	0	0	11	0
chr10	67166750	+	A	chr10:67166750	Jmjd1c	SINE	Intron	non_coding_transcript_variant	0	0	-	-	-	-	2.46027	0.0055	0.001	0.423	|	2.21462	0.00464	0.001	0.423	|	0	20	0	0	10	0	0	16	0	0	6	0	0	12	0	2	12	0.166667	|	0	14	0	0	10	0
chr10	67241480	+	A	chr10:67241480	Jmjd1c	LTR	Intron	non_coding_transcript_variant	0	0	-	-	-	-	-1.65526	0.001	0.00315	0.423	|	-1.17428	0.00475	0.0107	0.7	|	1	32	0.03125	0	32	0	0	38	0	0	23	0	0	29	0	0	17	0	|	1	28	0.0357143	0	19	0
chr10	67241511	+	A	chr10:67241511	Jmjd1c	LTR	Intron	non_coding_transcript_variant	1	1	-	-	-	-	1.68195	0.0115	0.00357	0.547	|	2.0489	0.0127	0.00306	0.456	|	2	44	0.0454545	0	35	0	0	40	0	1	36	0.0277778	2	37	0.0540541	0	28	0	|	0	37	0	0	24	0
chr10	67245312	+	A	chr10:67245312	Jmjd1c	SINE	Intron	non_coding_transcript_exon_variant	0	0	-	-	-	-	0.251629	0.0118	0.00991	0.925	|	4.02609	0.0163	0.001	0.184	|	0	48	0	3	54	0.0555556	1	57	0.0175439	0	70	0	3	48	0.0625	1	38	0.0263158	|	0	36	0	0	20	0
chr10	69597167	+	A	chr10:69597167	Ank3	SINE	Intron	non_coding_transcript_variant	0	0	-	-	-	-	4.12311	0.0555	0.00318	0.126	|	-4.10562	0.001	0.0172	0.184	|	0	26	0	0	28	0	1	31	0.0322581	2	28	0.0714286	2	27	0.0740741	1	31	0.0322581	|	0	9	0	1	14	0.0714286
chr10	69597230	+	A	chr10:69597230	Ank3	SINE	Intron	non_coding_transcript_variant	0	0	-	-	-	-	1.7026	0.00325	0.001	0.423	|	-1.88129	0.001	0.00368	0.423	|	0	28	0	0	28	0	0	30	0	0	19	0	0	25	0	1	29	0.0344828	|	0	14	0	0	13	0
chr10	69600273	+	A	chr10:69600273	Ank3	DNA	Intron	non_coding_transcript_variant	0	0	-	-	-	-	-1.15443	0.00437	0.00972	0.691	|	-0.126171	0.00425	0.00464	0.969	|	0	16	0	1	32	0.03125	1	34	0.0294118	0	23	0	2	24	0.0833333	0	22	0	|	0	6	0	0	5	0
chr10	69600664	+	A	chr10:69600664	Ank3	DNA	Intron	non_coding_transcript_variant	0	0	-	-	-	-	-0.955416	0.00575	0.0112	0.773	|	-0.0826425	0.00375	0.00397	0.978	|	0	19	0	1	20	0.05	1	36	0.0277778	4	21	0.190476	0	27	0	0	15	0	|	0	10	0	0	6	0
chr10	69600783	+	A	chr10:69600783	Ank3	DNA	Intron	non_coding_transcript_variant	0	0	-	-	-	-	-0.771438	0.0735	0.125	0.395	|	2.23929	0.00472	0.001	0.423	|	2	19	0.105263	3	20	0.15	4	32	0.125	1	36	0.0277778	4	28	0.142857	2	20	0.1	|	0	10	0	0	7	0
chr10	69604542	+	A	chr10:69604542	Ank3	SINE	Intron	non_coding_transcript_variant	0	0	69605209	667	downstream	intronic	-3.70995	0.001	0.0131	0.184	|	-0.04813	0.00362	0.00375	0.986	|	0	23	0	2	35	0.0571429	2	51	0.0392157	0	56	0	0	43	0	0	16	0	|	0	15	0	0	16	0
chr10	69611742	+	A	chr10:69611742	Ank3	DNA	Intron	non_coding_transcript_variant	0	0	-	-	-	-	-0.503678	0.00737	0.0104	0.833	|	0.421011	0.0174	0.013	0.888	|	1	39	0.025641	2	45	0.0444444	0	63	0	0	49	0	1	61	0.0163934	1	41	0.0243902	|	1	17	0.0588235	0	21	0
chr10	69643092	+	A	chr10:69643092	Ank3	SINE	Intron	non_coding_transcript_variant	0	0	-	-	-	-	-3.42208	0.00368	0.0395	0.208	|	0	0.001	0.001	---	|	1	29	0.0344828	1	16	0.0625	1	35	0.0285714	0	22	0	0	9	0	1	20	0.05	|	0	9	0	0	6	0
chr10	69664276	+	A	chr10:69664276	Ank3	SINE	Intron	non_coding_transcript_variant	0	0	-	-	-	-	0	0.001	0.001	---	|	2.28344	0.00487	0.001	0.423	|	0	26	0	0	14	0	0	36	0	0	40	0	0	22	0	0	16	0	|	0	10	0	0	10	0
chr10	69666049	+	A	chr10:69666049	Ank3	SINE	Intron	non_coding_transcript_variant	0	0	-	-	-	-	-1.9455	0.0295	0.114	0.515	|	0.0741308	0.0055	0.00523	0.984	|	4	28	0.142857	2	39	0.0512821	9	45	0.2	3	27	0.111111	0	21	0	6	26	0.230769	|	0	9	0	0	10	0
chr10	69666085	+	A	chr10:69666085	Ank3	SINE	Intron	non_coding_transcript_variant	0	0	69663772	2313	upstream	intronic	-5.29818	0.001	0.0393	0.0128	|	0.0506677	0.00481	0.00464	0.988	|	1	24	0.0416667	3	38	0.0789474	1	54	0.0185185	0	29	0	0	17	0	0	12	0	|	0	12	0	0	11	0
chr10	69673564	+	A	chr10:69673564	Ank3	SINE	Intron	non_coding_transcript_variant	0	0	-	-	-	-	0.395471	0.0041	0.00312	0.887	|	2.0803	0.0203	0.00481	0.545	|	0	16	0	0	14	0	1	33	0.030303	2	29	0.0689655	0	33	0	0	15	0	|	0	12	0	0	7	0
chr10	69688453	+	A	chr10:69688453	Ank3	SINE	Intron	non_coding_transcript_variant	0	0	69687466	987	upstream	intronic	-2.3023	0.0232	0.114	0.421	|	-0.578989	0.0212	0.0317	0.872	|	2	10	0.2	1	25	0.04	3	16	0.1875	0	12	0	2	20	0.1	2	16	0.125	|	2	7	0.285714	1	9	0.111111
chr10	69688461	+	A	chr10:69688461	Ank3	SINE	Intron	non_coding_transcript_variant	0	0	69687458	1003	upstream	intronic	0.586444	0.373	0.249	0.423	|	0.477653	0.306	0.22	0.587	|	3	9	0.333333	3	26	0.115385	6	15	0.4	4	12	0.333333	5	18	0.277778	9	16	0.5625	|	1	7	0.142857	4	9	0.444444
chr10	69715300	+	A	chr10:69715300	Ank3	SINE	Intron	non_coding_transcript_variant	0	0	-	-	-	-	0.157337	0.508	0.456	0.432	|	0.269118	0.559	0.464	0.552	|	13	24	0.541667	12	28	0.428571	11	27	0.407407	20	33	0.606061	10	22	0.454545	10	21	0.47619	|	9	12	0.75	2	6	0.333333
chr10	69729857	+	A	chr10:69729857	Ank3	SINE	Intron	non_coding_transcript_variant	0	0	-	-	-	-	-2.07816	0.00397	0.0168	0.51	|	2.71948	0.00659	0.001	0.423	|	0	16	0	2	17	0.117647	1	25	0.04	1	16	0.0625	0	15	0	0	16	0	|	0	7	0	0	5	0
chr10	72663552	+	A	chr10:72663552	Zwint	LTR	Intron	intron_variant	0	0	-	-	-	-	-1.65349	0.0152	0.0477	0.493	|	-3.06784	0.00487	0.0408	0.31	|	2	36	0.0555556	2	36	0.0555556	2	57	0.0350877	0	18	0	1	25	0.04	2	23	0.0869565	|	1	35	0.0285714	1	12	0.0833333
chr10	72663576	+	A	chr10:72663576	Zwint	LTR	Intron	intron_variant	1	1	-	-	-	-	0.323618	0.00342	0.00273	0.895	|	-1.56864	0.00472	0.014	0.624	|	0	25	0	0	32	0	1	49	0.0204082	0	21	0	1	25	0.04	0	25	0	|	1	28	0.0357143	1	13	0.0769231
chr10	75730604	-	T	chr10:75730604	Cabin1	SINE	Intron	non_coding_transcript_variant	0	0	-	-	-	-	2.61809	0.0255	0.00415	0.45	|	0.0213768	0.0045	0.00443	0.995	|	0	12	0	1	14	0.0714286	0	12	0	2	11	0.181818	0	14	0	1	11	0.0909091	|	0	11	0	0	10	0
chr10	75917669	-	T	chr10:75917669	Smarcb1	SINE	Intron	NMD_transcript_variant	0	0	-	-	-	-	2.10731	0.00431	0.001	0.423	|	-1.83545	0.001	0.00357	0.423	|	0	17	0	0	18	0	0	18	0	2	25	0.08	0	31	0	0	8	0	|	0	17	0	0	9	0
chr10	77322603	-	T	chr10:77322603	Adarb1	.	Intron	missense_variant	1	1	-	-	-	-	0.115974	0.00357	0.00329	0.965	|	0	0.001	0.001	---	|	0	14	0	1	28	0.0357143	0	22	0	1	22	0.0454545	0	12	0	0	13	0	|	0	34	0	0	9	0
chr10	77322607	-	T	chr10:77322607	Adarb1	.	Intron	missense_variant	0	0	-	-	-	-	0.436652	0.58	0.428	0.224	|	0.222	0.477	0.409	0.494	|	6	14	0.428571	11	27	0.407407	9	20	0.45	9	22	0.409091	8	12	0.666667	10	14	0.714286	|	13	34	0.382353	3	9	0.333333
chr10	77322608	-	T	chr10:77322608	Adarb1	.	Intron	synonymous_variant	1	1	-	-	-	-	0.496312	0.136	0.0965	0.64	|	-2.41363	0.00437	0.0233	0.481	|	2	13	0.153846	3	27	0.111111	1	19	0.0526316	1	22	0.0454545	2	12	0.166667	5	15	0.333333	|	4	34	0.117647	0	9	0
chr10	77322621	-	T	chr10:77322621	Adarb1	.	Intron	missense_variant	1	1	-	-	-	-	0.887655	0.204	0.111	0.39	|	-2.12163	0.0342	0.149	0.499	|	2	12	0.166667	1	26	0.0384615	4	19	0.210526	10	26	0.384615	2	12	0.166667	2	15	0.133333	|	3	35	0.0857143	1	8	0.125
chr10	77322631	-	T	chr10:77322631	Adarb1	.	Intron	splice_acceptor_variant	1	1	-	-	-	-	0.151893	0.151	0.136	0.587	|	-2.00945	0.0161	0.0647	0.428	|	2	11	0.181818	3	27	0.111111	2	16	0.125	3	21	0.142857	2	11	0.181818	2	15	0.133333	|	1	37	0.027027	1	8	0.125
chr10	77322658	-	T	chr10:77322658	Adarb1	.	Intron	non_coding_transcript_variant	0	0	-	-	-	-	-1.79361	0.00405	0.0141	0.555	|	-0.107309	0.00464	0.005	0.975	|	0	10	0	1	24	0.0416667	1	15	0.0666667	1	15	0.0666667	0	8	0	0	11	0	|	0	36	0	1	8	0.125
chr10	77322659	-	T	chr10:77322659	Adarb1	.	Intron	non_coding_transcript_variant	0	0	-	-	-	-	-1.79361	0.001	0.00347	0.423	|	-1.62329	0.00368	0.0113	0.564	|	0	10	0	1	24	0.0416667	0	15	0	0	15	0	0	8	0	0	11	0	|	1	36	0.0277778	0	8	0
chr10	77324031	-	T	chr10:77324031	Adarb1	.	Intron	non_coding_transcript_exon_variant	1	1	-	-	-	-	-2.27609	0.00585	0.0283	0.567	|	-2.24566	0.005	0.0237	0.532	|	0	14	0	5	10	0.5	1	22	0.0454545	0	21	0	0	14	0	1	5	0.2	|	1	15	0.0666667	0	5	0
chr10	77324052	-	T	chr10:77324052	Adarb1	.	Intron	non_coding_transcript_exon_variant	1	1	-	-	-	-	-0.342856	0.00389	0.00493	0.915	|	5.84177	0.0574	0.001	0.00779	|	0	17	0	0	14	0	3	25	0.12	0	23	0	1	17	0.0588235	0	11	0	|	0	21	0	0	5	0
chr10	77324060	-	T	chr10:77324060	Adarb1	.	Intron	non_coding_transcript_exon_variant	1	1	-	-	-	-	-0.0226542	0.455	0.462	0.944	|	-0.254082	0.415	0.495	0.548	|	7	17	0.411765	6	13	0.461538	13	25	0.52	14	21	0.666667	7	18	0.388889	4	11	0.363636	|	10	21	0.47619	2	6	0.333333
chr10	77324068	-	T	chr10:77324068	Adarb1	.	Intron	non_coding_transcript_exon_variant	1	1	-	-	-	-	2.60725	0.0208	0.00342	0.41	|	2.0703	0.015	0.00357	0.491	|	0	17	0	0	12	0	1	25	0.04	0	22	0	2	17	0.117647	1	13	0.0769231	|	1	22	0.0454545	0	6	0
chr10	77324084	-	T	chr10:77324084	Adarb1	.	Intron	non_coding_transcript_exon_variant	1	1	-	-	-	-	-0.318141	0.228	0.284	0.617	|	-0.040674	0.361	0.371	0.906	|	5	16	0.3125	5	17	0.294118	8	32	0.25	9	23	0.391304	6	22	0.272727	2	18	0.111111	|	12	26	0.461538	3	10	0.3
chr10	77324088	-	T	chr10:77324088	Adarb1	.	Intron	non_coding_transcript_exon_variant	0	0	-	-	-	-	0.189849	0.0307	0.0269	0.959	|	-1	0.0598	0.12	0.114	|	2	16	0.125	0	17	0	5	32	0.15625	0	23	0	6	23	0.26087	2	18	0.111111	|	2	26	0.0769231	2	10	0.2
chr10	77324089	-	T	chr10:77324089	Adarb1	.	Intron	non_coding_transcript_exon_variant	1	1	-	-	-	-	-0.130873	0.174	0.19	0.752	|	2.42924	0.175	0.0325	0.453	|	4	16	0.25	3	17	0.176471	5	32	0.15625	5	23	0.217391	5	23	0.217391	2	18	0.111111	|	2	26	0.0769231	0	10	0
chr10	77324095	-	T	chr10:77324095	Adarb1	.	Intron	non_coding_transcript_exon_variant	0	0	-	-	-	-	-0.812033	0.0154	0.027	0.808	|	0.0994471	0.0329	0.0307	0.979	|	0	16	0	4	18	0.222222	3	34	0.0882353	1	24	0.0416667	2	23	0.0869565	0	19	0	|	3	26	0.115385	0	10	0
chr10	77615215	+	A	chr10:77615215	Sumo3	SINE	Intron	non_coding_transcript_exon_variant	1	1	-	-	-	-	0.310962	0.0045	0.00362	0.919	|	4.86988	0.0292	0.001	0.187	|	0	12	0	0	6	0	1	21	0.047619	2	22	0.0909091	0	18	0	0	20	0	|	0	16	0	0	7	0
chr10	77645099	+	A	chr10:77645099	Mir1930,Sumo3,Ube2g2	.	UTR	3_prime_UTR_variant	0	0	-	-	-	-	0.899182	0.0122	0.00652	0.714	|	-0.67819	0.017	0.0272	0.299	|	2	95	0.0210526	0	65	0	1	76	0.0131579	2	63	0.031746	0	61	0	3	53	0.0566038	|	2	104	0.0192308	1	44	0.0227273
chr10	79075688	-	T	chr10:79075688	2610008E11Rik	LINE	Intron	intron_variant	0	0	-	-	-	-	1.56809	0.0275	0.00926	0.619	|	2.28968	0.0722	0.0148	0.372	|	1	36	0.0277778	1	35	0.0285714	0	31	0	5	29	0.172414	6	50	0.12	0	30	0	|	0	10	0	1	10	0.1
chr10	79075715	-	T	chr10:79075715	2610008E11Rik	LINE	Intron	intron_variant	0	0	-	-	-	-	0.186476	0.00375	0.00329	0.946	|	4.25388	0.0191	0.001	0.185	|	0	37	0	1	28	0.0357143	0	25	0	0	27	0	2	38	0.0526316	0	27	0	|	0	9	0	0	8	0
chr10	79075730	-	T	chr10:79075730	2610008E11Rik	LINE	Intron	intron_variant	0	0	-	-	-	-	1.53608	0.0029	0.001	0.423	|	1.88129	0.00368	0.001	0.423	|	0	38	0	0	28	0	0	26	0	0	27	0	1	41	0.0243902	0	29	0	|	0	9	0	0	8	0
chr10	79079858	-	T	chr10:79079858	2610008E11Rik	LINE	Intron	intron_variant	0	0	-	-	-	-	2.42073	0.0766	0.0143	0.335	|	-2.11064	0.00469	0.0203	0.543	|	2	39	0.0512821	2	35	0.0571429	0	39	0	3	38	0.0789474	3	39	0.0769231	2	27	0.0740741	|	3	15	0.2	0	19	0
chr10	79079872	-	T	chr10:79079872	2610008E11Rik	LINE	Intron	intron_variant	0	0	-	-	-	-	-2.14963	0.0158	0.0701	0.399	|	-0.85287	0.0105	0.0189	0.771	|	1	37	0.027027	4	33	0.121212	4	38	0.105263	3	38	0.0789474	2	40	0.05	0	20	0	|	1	17	0.0588235	0	17	0
chr10	79079888	-	T	chr10:79079888	2610008E11Rik	LINE	Intron	intron_variant	0	0	-	-	-	-	3.63872	0.0125	0.001	0.184	|	-1.79361	0.001	0.00347	0.423	|	0	43	0	0	36	0	0	37	0	2	45	0.0444444	0	46	0	1	23	0.0434783	|	0	18	0	0	16	0
chr10	79079927	-	T	chr10:79079927	2610008E11Rik	LINE	Intron	intron_variant	0	0	-	-	-	-	-0.236591	0.0414	0.0488	0.682	|	1.45036	0.00947	0.00347	0.582	|	1	40	0.025	2	34	0.0588235	3	38	0.0789474	2	49	0.0408163	2	46	0.0434783	1	25	0.04	|	0	14	0	0	17	0
chr10	80303222	+	A	chr10:80303222	Apc2	SINE	Intron	non_coding_transcript_exon_variant	0	0	80304519	1297	downstream	intronic	3.03044	0.0283	0.00347	0.379	|	-0.14432	0.0042	0.00464	0.964	|	0	17	0	0	15	0	1	24	0.0416667	5	20	0.25	2	22	0.0909091	0	15	0	|	0	21	0	2	20	0.1
chr10	80303237	+	A	chr10:80303237	Apc2	SINE	Intron	non_coding_transcript_exon_variant	0	0	-	-	-	-	4.22159	0.0187	0.001	0.184	|	-1.73697	0.001	0.00333	0.423	|	0	16	0	0	16	0	0	22	0	2	22	0.0909091	2	28	0.0714286	0	16	0	|	0	19	0	0	24	0
chr10	80303277	+	A	chr10:80303277	Apc2	SINE	Intron	non_coding_transcript_exon_variant	0	0	-	-	-	-	3.70576	0.044	0.00338	0.168	|	1.69298	0.0133	0.0041	0.574	|	0	18	0	0	21	0	1	26	0.0384615	1	28	0.0357143	2	38	0.0526316	1	22	0.0454545	|	0	24	0	2	29	0.0689655
chr10	80303306	+	A	chr10:80303306	Apc2	SINE	Intron	non_coding_transcript_exon_variant	0	0	80304412	1106	downstream	intronic	-2.22856	0.022	0.103	0.432	|	0.765684	0.12	0.0703	0.323	|	3	17	0.176471	3	24	0.125	1	20	0.05	1	16	0.0625	6	35	0.171429	0	21	0	|	2	23	0.0869565	3	25	0.12
chr10	80704922	+	A	chr10:80704922	Ap3d1,Izumo4,Mob3a	SINE	Intron	non_coding_transcript_exon_variant	0	0	-	-	-	-	0.339816	0.0425	0.0335	0.518	|	0.509082	0.00389	0.00273	0.846	|	1	43	0.0232558	1	28	0.0357143	1	22	0.0454545	3	56	0.0535714	2	35	0.0571429	1	40	0.025	|	0	21	0	0	15	0
chr10	81220202	-	T	chr10:81220202	Atcay	SINE	Intron	NMD_transcript_variant	0	0	-	-	-	-	-0.451212	0.00352	0.00481	0.884	|	3.98476	0.0158	0.001	0.188	|	2	18	0.111111	0	19	0	0	27	0	0	30	0	0	29	0	1	23	0.0434783	|	0	12	0	0	10	0
chr10	81665277	+	A	chr10:81665277	Gm10778	SINE	UTR	3_prime_UTR_variant	0	0	81664602	675	upstream	UTR	0.214205	0.151	0.13	0.743	|	-4.61571	0.00598	0.147	0.208	|	1	13	0.0769231	3	11	0.272727	2	19	0.105263	2	17	0.117647	4	21	0.190476	2	13	0.153846	|	6	10	0.6	1	10	0.1
chr10	81665309	+	A	chr10:81665309	Gm10778	SINE	UTR	3_prime_UTR_variant	0	0	-	-	-	-	1.56544	0.0155	0.00523	0.641	|	0	0.001	0.001	---	|	2	14	0.142857	0	10	0	0	17	0	1	18	0.0555556	0	24	0	1	15	0.0666667	|	0	7	0	0	13	0
chr10	81665312	+	A	chr10:81665312	Gm10778	SINE	UTR	3_prime_UTR_variant	0	0	-	-	-	-	4.44821	0.0906	0.00415	0.158	|	-4.91063	0.001	0.0301	0.184	|	1	14	0.0714286	0	10	0	0	18	0	3	19	0.157895	2	25	0.08	1	17	0.0588235	|	1	7	0.142857	0	15	0
chr10	82224461	-	T	chr10:82224461	Zfp938	SINE	intergenic	downstream_gene_variant	0	0	-	-	-	-	4.15738	0.0178	0.001	0.189	|	0.0876781	0.00464	0.00437	0.979	|	0	11	0	0	14	0	0	7	0	1	22	0.0454545	1	8	0.125	0	10	0	|	0	11	0	1	12	0.0833333
chr10	82224470	-	T	chr10:82224470	Zfp938	SINE	intergenic	downstream_gene_variant	0	0	-	-	-	-	-4.82405	0.001	0.0283	0.184	|	0.245655	0.024	0.0203	0.942	|	2	11	0.181818	0	14	0	1	8	0.125	0	22	0	0	10	0	0	12	0	|	1	10	0.1	1	12	0.0833333
chr10	82226712	-	T	chr10:82226712	Zfp938	Unknown	Intron	NMD_transcript_variant	0	0	-	-	-	-	-2.38844	0.00322	0.0169	0.421	|	-1.93195	0.001	0.00382	0.423	|	1	19	0.0526316	0	14	0	2	22	0.0909091	0	15	0	0	38	0	1	30	0.0333333	|	2	36	0.0555556	0	25	0
chr10	82226723	-	T	chr10:82226723	Zfp938	Unknown	Intron	NMD_transcript_variant	0	0	-	-	-	-	0	0.00375	0.00375	1	|	1.67053	0.00318	0.001	0.423	|	1	19	0.0526316	0	15	0	0	20	0	0	17	0	2	38	0.0526316	0	32	0	|	0	33	0	0	23	0
chr10	82703129	+	A	chr10:82703129	Hcfc2	SINE	Intron	non_coding_transcript_variant	0	0	82703902	773	downstream	intronic	-1.68884	0.0196	0.0632	0.517	|	-0.559357	0.0539	0.0794	0.476	|	1	21	0.047619	2	18	0.111111	1	21	0.047619	2	19	0.105263	1	14	0.0714286	0	12	0	|	1	20	0.05	1	19	0.0526316
chr10	82703133	+	A	chr10:82703133	Hcfc2	SINE	Intron	non_coding_transcript_variant	0	0	82705008	1875	downstream	intronic	-0.176165	0.0705	0.0796	0.674	|	0.478648	0.161	0.116	0.541	|	2	22	0.0909091	2	18	0.111111	1	20	0.05	1	17	0.0588235	1	14	0.0714286	1	12	0.0833333	|	5	22	0.227273	1	20	0.05
chr10	82703168	+	A	chr10:82703168	Hcfc2	SINE	Intron	non_coding_transcript_variant	0	0	82704972	1804	downstream	intronic	-0.386997	0.0537	0.0703	0.584	|	-2.49367	0.0122	0.069	0.306	|	5	36	0.138889	2	32	0.0625	1	25	0.04	2	23	0.0869565	1	28	0.0357143	1	20	0.05	|	1	30	0.0333333	2	29	0.0689655
chr10	82703188	+	A	chr10:82703188	Hcfc2	SINE	Intron	non_coding_transcript_variant	0	0	82704955	1767	downstream	intronic	-0.515145	0.015	0.0214	0.872	|	-1.98859	0.001	0.00397	0.423	|	4	37	0.108108	3	33	0.0909091	0	23	0	0	23	0	1	33	0.030303	3	27	0.111111	|	0	32	0	2	32	0.0625
chr10	82703889	+	A	chr10:82703889	Hcfc2	SINE	Intron	non_coding_transcript_variant	0	0	82705012	1123	downstream	intronic	4.04667	0.0643	0.00389	0.169	|	1.57976	0.078	0.0261	0.584	|	0	23	0	0	28	0	2	34	0.0588235	1	27	0.037037	2	31	0.0645161	2	18	0.111111	|	2	25	0.08	2	9	0.222222
chr10	82703894	+	A	chr10:82703894	Hcfc2	SINE	Intron	non_coding_transcript_variant	0	0	82705007	1113	downstream	intronic	4.51072	0.0742	0.00325	0.114	|	-0.0430943	0.0748	0.0771	0.958	|	0	21	0	1	29	0.0344828	0	31	0	3	27	0.111111	2	32	0.0625	1	17	0.0588235	|	3	26	0.115385	1	9	0.111111
chr10	82703940	+	A	chr10:82703940	Hcfc2	SINE	Intron	non_coding_transcript_variant	0	0	82704964	1024	downstream	intronic	1.6863	0.00322	0.001	0.423	|	-0.0544101	0.0127	0.0132	0.984	|	0	22	0	0	31	0	0	41	0	1	30	0.0333333	0	37	0	0	20	0	|	1	24	0.0416667	0	10	0
chr10	82704956	+	A	chr10:82704956	Hcfc2	SINE	Intron	non_coding_transcript_variant	0	0	82703184	1772	upstream	intronic	0.480746	0.186	0.133	0.352	|	-0.975783	0.117	0.23	0.364	|	5	27	0.185185	3	18	0.166667	2	26	0.0769231	5	25	0.2	6	31	0.193548	5	30	0.166667	|	5	29	0.172414	9	27	0.333333
chr10	82705015	+	A	chr10:82705015	Hcfc2	SINE	Intron	non_coding_transcript_variant	0	0	82703886	1129	upstream	intronic	3.48119	0.0551	0.00493	0.268	|	0.699978	0.0177	0.0109	0.81	|	0	33	0	0	24	0	3	25	0.12	1	32	0.03125	3	33	0.0909091	2	34	0.0588235	|	2	37	0.0540541	0	20	0
chr10	82705017	+	A	chr10:82705017	Hcfc2	SINE	Intron	non_coding_transcript_variant	0	0	82703880	1137	upstream	intronic	3.99515	0.0545	0.00342	0.146	|	-3.43195	0.001	0.0108	0.186	|	0	35	0	1	25	0.04	0	25	0	1	32	0.03125	3	34	0.0882353	2	34	0.0588235	|	1	37	0.027027	0	20	0
chr10	82861200	+	A	chr10:82861200	AC158636.1,Txnrd1	SINE	Intron	regulatory_region_variant	0	0	-	-	-	-	-2.19982	0.005	0.023	0.538	|	-0.666667	0.00347	0.0055	0.838	|	1	15	0.0666667	0	11	0	4	22	0.181818	0	17	0	4	32	0.125	0	16	0	|	2	12	0.166667	0	11	0
chr10	83193092	+	A	chr10:83193092	Chst11	.	UTR	3_prime_UTR_variant	0	0	-	-	-	-	-0.421011	0.00275	0.00368	0.869	|	-1.24566	0.00275	0.00652	0.566	|	2	40	0.05	0	35	0	0	60	0	0	48	0	1	48	0.0208333	0	45	0	|	1	60	0.0166667	0	26	0
chr10	83194710	+	A	chr10:83194710	Chst11	.	UTR	3_prime_UTR_variant	0	0	-	-	-	-	-1.84615	0.00318	0.0114	0.489	|	1.87048	0.013	0.00357	0.513	|	1	23	0.0434783	1	29	0.0344828	0	31	0	0	43	0	0	23	0	1	31	0.0322581	|	0	45	0	0	19	0
chr10	83494347	-	T	chr10:83494347	Aldh1l2	SINE	Intron	non_coding_transcript_variant	0	0	-	-	-	-	0	0.001	0.001	---	|	-5.11554	0.001	0.0347	0.184	|	0	11	0	0	10	0	0	13	0	0	12	0	0	10	0	0	13	0	|	1	6	0.166667	0	5	0
chr10	83611553	-	T	chr10:83611553	Appl2	.	Intron	non_coding_transcript_exon_variant	0	0	83611885	332	upstream	intronic	-0.191906	0.0825	0.0943	0.837	|	2.41729	0.132	0.0247	0.406	|	1	27	0.037037	3	26	0.115385	10	51	0.196078	1	24	0.0416667	3	23	0.130435	3	29	0.103448	|	3	25	0.12	0	13	0
chr10	83611903	-	T	chr10:83611903	Appl2	.	Intron	non_coding_transcript_exon_variant	0	0	83611537	366	downstream	intronic	4.6147	0.0245	0.001	0.184	|	-1.88129	0.001	0.00368	0.423	|	0	23	0	0	10	0	0	12	0	2	17	0.117647	0	24	0	2	16	0.125	|	0	14	0	0	8	0
chr10	87931707	+	A	chr10:87931707	Igf1	.	UTR	3_prime_UTR_variant	1	1	-	-	-	-	0.277239	0.0489	0.0403	0.482	|	1.68032	0.017	0.00531	0.628	|	2	36	0.0555556	1	36	0.0277778	2	47	0.0425532	2	31	0.0645161	1	23	0.0434783	1	24	0.0416667	|	0	8	0	0	12	0
chr10	89653333	-	T	chr10:89653333	Scyl2	SINE	Intron	non_coding_transcript_variant	0	0	89653831	498	upstream	intronic	-4.03289	0.001	0.0164	0.185	|	0.602452	0.00464	0.00306	0.838	|	0	13	0	1	19	0.0526316	2	24	0.0833333	0	13	0	0	9	0	0	13	0	|	0	7	0	0	7	0
chr10	89653653	-	T	chr10:89653653	Scyl2	SINE	Intron	non_coding_transcript_variant	0	0	-	-	-	-	2.04725	0.0118	0.00285	0.432	|	-0.194988	0.00405	0.00464	0.951	|	0	15	0	0	23	0	1	43	0.0232558	1	29	0.0344828	0	26	0	1	21	0.047619	|	0	13	0	0	5	0
chr10	89875103	+	A	chr10:89875103	Anks1b	DNA	Intron	NMD_transcript_variant	0	0	-	-	-	-	0	0.001	0.001	---	|	2.38614	0.00523	0.001	0.423	|	0	11	0	0	8	0	0	14	0	0	11	0	0	13	0	0	5	0	|	0	10	0	0	7	0
chr10	89875137	+	A	chr10:89875137	Anks1b	DNA	Intron	NMD_transcript_variant	0	0	-	-	-	-	0	0.001	0.001	---	|	-2.42178	0.001	0.00536	0.423	|	0	13	0	0	9	0	0	16	0	0	17	0	0	14	0	0	14	0	|	0	10	0	0	9	0
chr10	90378249	+	A	chr10:90378249	Anks1b	.	Intron	NMD_transcript_variant	0	0	-	-	-	-	1.95944	0.00389	0.001	0.423	|	2.23929	0.00472	0.001	0.423	|	0	27	0	0	15	0	0	18	0	0	12	0	0	22	0	1	17	0.0588235	|	0	5	0	0	6	0
chr10	90378252	+	A	chr10:90378252	Anks1b	.	Intron	NMD_transcript_variant	0	0	-	-	-	-	0	0.001	0.001	---	|	1.90595	0.00375	0.001	0.423	|	0	25	0	0	15	0	0	18	0	0	12	0	0	21	0	0	17	0	|	0	7	0	0	6	0
chr10	90378263	+	A	chr10:90378263	Anks1b	.	Intron	NMD_transcript_variant	0	0	90379426	1163	downstream	intronic	-0.968964	0.0167	0.0326	0.78	|	1.73342	0.0245	0.00737	0.668	|	5	24	0.208333	0	13	0	3	18	0.166667	1	12	0.0833333	1	18	0.0555556	0	16	0	|	0	7	0	2	5	0.4
chr10	90378338	+	A	chr10:90378338	Anks1b	.	Intron	NMD_transcript_variant	0	0	90379344	1006	downstream	intronic	2.50212	0.00567	0.001	0.423	|	0	0.001	0.001	---	|	0	7	0	0	5	0	0	20	0	0	19	0	0	14	0	2	11	0.181818	|	0	13	0	0	8	0
chr10	90379338	+	A	chr10:90379338	Anks1b	.	Intron	NMD_transcript_variant	0	0	90378344	994	upstream	intronic	-1.93195	0.001	0.00382	0.423	|	0	0.001	0.001	---	|	1	18	0.0555556	0	13	0	0	23	0	0	14	0	0	18	0	0	18	0	|	0	7	0	0	5	0
chr10	90379341	+	A	chr10:90379341	Anks1b	.	Intron	NMD_transcript_variant	0	0	90378340	1001	upstream	intronic	-1.88129	0.001	0.00368	0.423	|	0	0.001	0.001	---	|	1	20	0.05	0	12	0	0	24	0	0	16	0	0	17	0	0	19	0	|	0	7	0	0	5	0
chr10	90379430	+	A	chr10:90379430	Anks1b	.	Intron	NMD_transcript_variant	0	0	90378260	1170	upstream	intronic	-1.79361	0.001	0.00347	0.423	|	2.32193	0.005	0.001	0.423	|	1	24	0.0416667	0	21	0	0	30	0	0	24	0	0	35	0	0	21	0	|	0	5	0	0	8	0
chr10	90379433	+	A	chr10:90379433	Anks1b	.	Intron	NMD_transcript_variant	0	0	90378257	1176	upstream	intronic	1.79361	0.00347	0.001	0.423	|	2.21462	0.00464	0.001	0.423	|	0	25	0	0	20	0	0	30	0	1	24	0.0416667	0	34	0	0	20	0	|	0	5	0	0	8	0
chr10	90379434	+	A	chr10:90379434	Anks1b	.	Intron	NMD_transcript_variant	0	0	-	-	-	-	1.88129	0.00368	0.001	0.423	|	2.16878	0.0045	0.001	0.423	|	0	25	0	0	20	0	0	30	0	0	24	0	0	34	0	1	20	0.05	|	0	5	0	0	8	0
chr10	90379444	+	A	chr10:90379444	Anks1b	.	Intron	NMD_transcript_variant	0	0	-	-	-	-	1.52151	0.0101	0.00352	0.571	|	-2.08845	0.001	0.00425	0.423	|	1	23	0.0434783	0	24	0	0	30	0	1	27	0.037037	1	36	0.0277778	0	19	0	|	0	6	0	0	9	0
chr10	90379496	+	A	chr10:90379496	Anks1b	.	Intron	NMD_transcript_variant	0	0	90378193	1303	upstream	intronic	0	0.001	0.001	---	|	0	0.001	0.001	---	|	0	13	0	0	27	0	0	26	0	0	30	0	0	32	0	0	16	0	|	0	6	0	0	7	0
chr10	90686252	+	A	chr10:90686252	Anks1b	LINE	Intron	NMD_transcript_variant	0	0	-	-	-	-	0.0157686	0.00405	0.00401	0.996	|	0	0.001	0.001	---	|	0	21	0	0	11	0	2	31	0.0645161	0	25	0	0	20	0	1	15	0.0666667	|	0	9	0	0	6	0
chr10	90700790	+	A	chr10:90700790	Anks1b	LTR	Intron	NMD_transcript_variant	0	0	-	-	-	-	3.07153	0.0968	0.0115	0.226	|	-4.13889	0.0041	0.0722	0.178	|	3	48	0.0625	0	33	0	1	41	0.0243902	4	53	0.0754717	1	25	0.04	12	40	0.3	|	1	12	0.0833333	1	13	0.0769231
chr10	90700797	+	A	chr10:90700797	Anks1b	LTR	Intron	NMD_transcript_variant	0	0	-	-	-	-	1.32475	0.14	0.056	0.215	|	0.298969	0.00469	0.00382	0.924	|	1	49	0.0204082	4	34	0.117647	3	41	0.0731707	6	53	0.113208	5	25	0.2	5	41	0.121951	|	0	12	0	0	13	0
chr10	90700810	+	A	chr10:90700810	Anks1b	LTR	Intron	NMD_transcript_variant	0	0	-	-	-	-	0.931472	0.0204	0.0107	0.756	|	-2.06147	0.00437	0.0182	0.528	|	1	44	0.0227273	0	34	0	2	37	0.0540541	0	48	0	2	22	0.0909091	3	32	0.09375	|	0	11	0	1	11	0.0909091
chr10	90700811	+	A	chr10:90700811	Anks1b	LTR	Intron	NMD_transcript_variant	0	0	-	-	-	-	1.03053	0.306	0.15	0.0953	|	-0.593628	0.0251	0.0379	0.878	|	5	44	0.113636	4	33	0.121212	9	37	0.243243	15	47	0.319149	7	22	0.318182	9	32	0.28125	|	0	11	0	1	11	0.0909091
chr10	90700823	+	A	chr10:90700823	Anks1b	LTR	Intron	NMD_transcript_variant	0	0	-	-	-	-	-1.70003	0.0134	0.0434	0.464	|	0.176838	0.00481	0.00425	0.957	|	1	41	0.0243902	1	28	0.0357143	3	32	0.09375	2	40	0.05	0	20	0	1	21	0.047619	|	0	9	0	0	8	0
chr10	90701013	+	A	chr10:90701013	Anks1b	LTR	Intron	NMD_transcript_variant	1	1	90699781	1232	upstream	intronic	2.08845	0.00425	0.001	0.423	|	-2.01963	0.001	0.00405	0.423	|	0	15	0	0	13	0	0	23	0	0	25	0	2	26	0.0769231	0	16	0	|	0	8	0	0	6	0
chr10	90707750	+	A	chr10:90707750	Anks1b	SINE	Intron	NMD_transcript_variant	0	0	-	-	-	-	-2.49345	0.0119	0.067	0.3	|	-2.64277	0.00375	0.0234	0.428	|	2	33	0.0606061	2	42	0.047619	5	48	0.104167	2	36	0.0555556	0	27	0	1	33	0.030303	|	0	9	0	1	6	0.166667
chr10	90707784	+	A	chr10:90707784	Anks1b	SINE	Intron	NMD_transcript_variant	0	0	-	-	-	-	-3.91763	0.001	0.0151	0.192	|	-0.602452	0.00362	0.0055	0.855	|	0	31	0	4	38	0.105263	2	61	0.0327869	0	34	0	0	28	0	0	30	0	|	0	9	0	1	6	0.166667
chr10	90797871	+	A	chr10:90797871	Anks1b	LTR	Intron	NMD_transcript_variant	0	0	-	-	-	-	0.147869	0.00342	0.00309	0.954	|	1.80441	0.0142	0.00405	0.552	|	0	25	0	0	16	0	1	34	0.0294118	1	25	0.04	0	25	0	0	17	0	|	0	11	0	0	14	0
chr10	90797875	+	A	chr10:90797875	Anks1b	LTR	Intron	NMD_transcript_variant	0	0	-	-	-	-	2.0703	0.0042	0.001	0.423	|	0.150837	0.00472	0.00425	0.963	|	0	26	0	0	16	0	0	32	0	2	27	0.0740741	0	27	0	0	17	0	|	0	11	0	1	13	0.0769231
chr10	90797883	+	A	chr10:90797883	Anks1b	LTR	Intron	NMD_transcript_variant	0	0	-	-	-	-	4.60076	0.0243	0.001	0.184	|	4.25892	0.0191	0.001	0.185	|	0	27	0	0	15	0	0	31	0	3	28	0.107143	0	26	0	2	15	0.133333	|	0	10	0	0	12	0
chr10	90797884	+	A	chr10:90797884	Anks1b	LTR	Intron	NMD_transcript_variant	0	0	-	-	-	-	2.59989	0.081	0.0134	0.303	|	2.0443	0.0191	0.00464	0.543	|	2	28	0.0714286	0	14	0	1	30	0.0333333	2	29	0.0689655	1	26	0.0384615	3	15	0.2	|	1	10	0.1	0	12	0
chr10	90797885	+	A	chr10:90797885	Anks1b	LTR	Intron	NMD_transcript_variant	0	0	-	-	-	-	2.3886	0.101	0.0193	0.383	|	-1.57395	0.0348	0.104	0.605	|	2	28	0.0714286	0	14	0	3	30	0.1	4	30	0.133333	1	26	0.0384615	3	15	0.2	|	2	10	0.2	1	12	0.0833333
chr10	90797897	+	A	chr10:90797897	Anks1b	LTR	Intron	NMD_transcript_variant	0	0	-	-	-	-	-1.6711	0.022	0.0699	0.557	|	4.47991	0.0223	0.001	0.184	|	2	22	0.0909091	1	19	0.0526316	2	28	0.0714286	0	29	0	1	27	0.037037	4	14	0.285714	|	0	9	0	0	12	0
chr10	90797898	+	A	chr10:90797898	Anks1b	LTR	Intron	NMD_transcript_variant	0	0	-	-	-	-	0.333333	0.00523	0.00415	0.921	|	4.84073	0.0287	0.001	0.186	|	0	21	0	0	19	0	2	28	0.0714286	0	30	0	0	28	0	2	14	0.142857	|	0	9	0	0	12	0
chr10	90797912	+	A	chr10:90797912	Anks1b	LTR	Intron	NMD_transcript_variant	0	0	-	-	-	-	1.55942	0.247	0.0838	0.225	|	0.76652	0.258	0.151	0.168	|	1	24	0.0416667	1	21	0.047619	8	27	0.296296	11	36	0.305556	5	29	0.172414	4	14	0.285714	|	2	12	0.166667	3	16	0.1875
chr10	90797914	+	A	chr10:90797914	Anks1b	LTR	Intron	NMD_transcript_variant	0	0	-	-	-	-	1.66283	0.0158	0.005	0.616	|	0.471679	0.021	0.0151	0.882	|	3	24	0.125	0	21	0	0	27	0	2	36	0.0555556	2	28	0.0714286	0	14	0	|	0	12	0	1	16	0.0625
chr10	90797922	+	A	chr10:90797922	Anks1b	LTR	Intron	NMD_transcript_variant	0	0	-	-	-	-	2.59225	0.0968	0.0161	0.336	|	1.93195	0.00382	0.001	0.423	|	3	25	0.12	0	21	0	1	29	0.0344828	7	38	0.184211	2	29	0.0689655	1	14	0.0714286	|	0	12	0	0	16	0
chr10	90797928	+	A	chr10:90797928	Anks1b	LTR	Intron	NMD_transcript_variant	0	0	-	-	-	-	1.54734	0.0576	0.0197	0.549	|	0.222475	0.0245	0.021	0.949	|	2	27	0.0740741	0	21	0	3	29	0.103448	3	40	0.075	1	28	0.0357143	1	14	0.0714286	|	1	12	0.0833333	2	18	0.111111
chr10	90797936	+	A	chr10:90797936	Anks1b	LTR	Intron	NMD_transcript_variant	0	0	-	-	-	-	1.88343	0.0481	0.013	0.421	|	2.42178	0.00536	0.001	0.423	|	1	30	0.0333333	0	22	0	2	30	0.0666667	2	40	0.05	1	28	0.0357143	1	16	0.0625	|	0	12	0	0	20	0
chr10	90797994	+	A	chr10:90797994	Anks1b	LTR	Intron	NMD_transcript_variant	0	0	-	-	-	-	-1.56774	0.00318	0.00944	0.537	|	-1.98859	0.001	0.00397	0.423	|	1	34	0.0294118	0	23	0	1	35	0.0285714	0	52	0	1	31	0.0322581	0	18	0	|	0	14	0	0	16	0
chr10	90798008	+	A	chr10:90798008	Anks1b	LTR	Intron	NMD_transcript_variant	0	0	-	-	-	-	4.20645	0.0549	0.00297	0.103	|	-0.0826425	0.00375	0.00397	0.978	|	0	34	0	0	25	0	1	38	0.0263158	2	49	0.0408163	1	29	0.0344828	2	17	0.117647	|	0	15	0	1	16	0.0625
chr10	90798014	+	A	chr10:90798014	Anks1b	LTR	Intron	NMD_transcript_variant	0	0	-	-	-	-	4.67635	0.0797	0.00312	0.1	|	2.29277	0.0049	0.001	0.423	|	1	33	0.030303	0	23	0	0	39	0	4	47	0.0851064	3	28	0.107143	1	18	0.0555556	|	0	16	0	0	14	0
chr10	90798018	+	A	chr10:90798018	Anks1b	LTR	Intron	NMD_transcript_variant	0	0	-	-	-	-	0.579734	0.0198	0.0132	0.851	|	-4.00823	0.001	0.0161	0.184	|	1	34	0.0294118	0	19	0	3	38	0.0789474	3	43	0.0697674	3	27	0.111111	0	18	0	|	1	15	0.0666667	0	14	0
chr10	90798088	+	A	chr10:90798088	Anks1b	LTR	Intron	NMD_transcript_variant	0	0	-	-	-	-	0.400191	0.0178	0.0135	0.893	|	1.93195	0.00382	0.001	0.423	|	1	25	0.04	0	17	0	3	49	0.0612245	3	41	0.0731707	2	26	0.0769231	0	34	0	|	0	16	0	0	7	0
chr10	90798100	+	A	chr10:90798100	Anks1b	LTR	Intron	NMD_transcript_variant	0	0	-	-	-	-	0.165319	0.00295	0.00263	0.941	|	1.88129	0.00368	0.001	0.423	|	0	23	0	0	16	0	1	55	0.0181818	1	39	0.025641	0	29	0	0	35	0	|	0	18	0	0	7	0
chr10	90798102	+	A	chr10:90798102	Anks1b	LTR	Intron	NMD_transcript_variant	0	0	-	-	-	-	-1.83545	0.001	0.00357	0.423	|	0	0.001	0.001	---	|	1	22	0.0454545	0	17	0	0	56	0	0	39	0	0	27	0	0	34	0	|	0	17	0	0	8	0
chr10	90798103	+	A	chr10:90798103	Anks1b	LTR	Intron	NMD_transcript_variant	0	0	-	-	-	-	-1.97731	0.0188	0.074	0.47	|	-0.797439	0.00362	0.0063	0.819	|	1	22	0.0454545	3	18	0.166667	3	56	0.0535714	7	39	0.179487	1	27	0.037037	0	34	0	|	0	17	0	2	8	0.25
chr10	90798105	+	A	chr10:90798105	Anks1b	LTR	Intron	NMD_transcript_variant	0	0	-	-	-	-	1.54795	0.00292	0.001	0.423	|	1.88129	0.00368	0.001	0.423	|	0	23	0	0	20	0	0	59	0	1	40	0.025	0	28	0	0	34	0	|	0	17	0	0	8	0
chr10	90798123	+	A	chr10:90798123	Anks1b	LTR	Intron	NMD_transcript_variant	0	0	-	-	-	-	-0.0876781	0.00312	0.00331	0.972	|	1.52658	0.0163	0.00567	0.661	|	0	29	0	0	20	0	2	55	0.0363636	1	33	0.030303	0	28	0	0	34	0	|	0	16	0	0	6	0
chr10	91097742	+	A	chr10:91097742	Ikbip	SINE	UTR	3_prime_UTR_variant	0	0	91098456	714	downstream	UTR	1.92664	0.0176	0.00464	0.566	|	2.86242	0.00727	0.001	0.423	|	0	12	0	1	10	0.1	0	16	0	1	26	0.0384615	2	14	0.142857	0	10	0	|	0	14	0	0	13	0
chr10	91098466	+	A	chr10:91098466	Ikbip	SINE	UTR	3_prime_UTR_variant	0	0	-	-	-	-	-2.21162	0.005	0.0232	0.534	|	-2.6481	0.0104	0.0649	0.258	|	2	14	0.142857	0	15	0	2	23	0.0869565	3	24	0.125	0	10	0	0	20	0	|	2	29	0.0689655	1	14	0.0714286
chr10	91118456	-	T	chr10:91118456	Gm24119,Slc25a3	.	Exon	non_coding_transcript_exon_variant	1	1	-	-	-	-	0.0750094	0.0704	0.0669	0.678	|	0.0956774	0.0593	0.0555	0.61	|	259	3221	0.0804098	182	2722	0.0668626	161	2894	0.0556323	163	2396	0.0680301	214	3108	0.0688546	208	2787	0.0746322	|	203	3551	0.057167	102	2070	0.0492754
chr10	94721432	+	A	chr10:94721432	Cep83	SINE	Intron	non_coding_transcript_exon_variant	0	0	-	-	-	-	-2.08845	0.001	0.00425	0.423	|	2.11477	0.0184	0.00425	0.518	|	2	26	0.0769231	0	31	0	0	14	0	0	37	0	0	19	0	0	18	0	|	0	21	0	1	13	0.0769231
chr10	94721434	+	A	chr10:94721434	Cep83	SINE	Intron	non_coding_transcript_exon_variant	0	0	-	-	-	-	0.248248	0.00378	0.00318	0.927	|	4.56758	0.0237	0.001	0.184	|	0	26	0	1	31	0.0322581	0	14	0	2	37	0.0540541	0	19	0	0	18	0	|	0	21	0	0	13	0
chr10	95517797	+	A	chr10:95517797	Ube2n	SINE	Intron	non_coding_transcript_variant	0	0	95517428	369	upstream	intronic	0.340789	0.0198	0.0157	0.914	|	-2.69711	0.00405	0.0263	0.435	|	1	20	0.05	1	13	0.0769231	0	28	0	0	22	0	1	16	0.0625	3	24	0.125	|	2	15	0.133333	0	12	0
chr10	95537341	+	A	chr10:95537341	Ube2n	SINE	Intron	non_coding_transcript_variant	0	0	95535122	2219	upstream	intronic	-0.0653067	0.375	0.393	0.859	|	-0.842023	0.21	0.376	0.419	|	4	12	0.333333	4	11	0.363636	11	22	0.5	3	9	0.333333	4	14	0.285714	5	9	0.555556	|	2	5	0.4	4	12	0.333333
chr10	95537342	+	A	chr10:95537342	Ube2n	SINE	Intron	non_coding_transcript_variant	0	0	95535121	2221	upstream	intronic	0.111532	0.288	0.266	0.81	|	-1.03701	0.132	0.271	0.0509	|	3	13	0.230769	3	11	0.272727	6	20	0.3	2	9	0.222222	3	14	0.214286	4	8	0.5	|	1	5	0.2	3	12	0.25
chr10	95537409	+	A	chr10:95537409	Ube2n	SINE	Intron	non_coding_transcript_variant	0	0	95537616	207	downstream	intronic	0.194988	0.00437	0.00382	0.949	|	-1.90595	0.001	0.00375	0.423	|	0	17	0	0	22	0	1	18	0.0555556	0	13	0	1	12	0.0833333	0	20	0	|	0	8	0	0	10	0
chr10	95537418	+	A	chr10:95537418	Ube2n	SINE	Intron	non_coding_transcript_variant	0	0	95537607	189	downstream	intronic	2.44524	0.0197	0.00362	0.439	|	-5.20321	0.00481	0.177	0.145	|	0	17	0	1	21	0.047619	0	17	0	1	13	0.0769231	0	11	0	2	20	0.1	|	2	8	0.25	2	10	0.2
chr10	95944007	+	A	chr10:95944007	Eea1	LTR	Intron	non_coding_transcript_variant	0	0	-	-	-	-	5.92269	0.355	0.00585	0.138	|	4.65143	0.177	0.00705	0.24	|	0	6	0	1	5	0.2	0	10	0	2	14	0.142857	5	8	0.625	6	12	0.5	|	0	8	0	0	5	0
chr10	95975333	+	A	chr10:95975333	Eea1	LTR	Intron	non_coding_transcript_exon_variant	0	0	-	-	-	-	2.61111	0.026	0.00425	0.454	|	-1.83545	0.001	0.00357	0.423	|	0	16	0	1	13	0.0769231	0	30	0	2	19	0.105263	0	24	0	2	12	0.166667	|	0	11	0	0	15	0
chr10	95976261	+	A	chr10:95976261	Eea1	LTR	Intron	non_coding_transcript_variant	0	0	-	-	-	-	2.26743	0.181	0.0376	0.486	|	-2.91446	0.0063	0.0475	0.491	|	4	15	0.266667	2	10	0.2	0	12	0	1	21	0.047619	4	10	0.4	5	16	0.3125	|	0	10	0	2	7	0.285714
chr10	95976262	+	A	chr10:95976262	Eea1	LTR	Intron	non_coding_transcript_variant	0	0	-	-	-	-	4.29089	0.0855	0.00437	0.177	|	-4.70807	0.001	0.0261	0.184	|	0	15	0	0	10	0	1	12	0.0833333	1	20	0.05	1	10	0.1	2	16	0.125	|	0	9	0	1	7	0.142857
chr10	98926454	+	A	chr10:98926454	Atp2b1	.	Intron	intron_variant	0	0	-	-	-	-	0.238736	0.00523	0.00443	0.944	|	-2.42178	0.001	0.00536	0.423	|	0	10	0	0	12	0	2	23	0.0869565	2	14	0.142857	0	22	0	0	8	0	|	2	13	0.153846	0	9	0
chr10	98926462	+	A	chr10:98926462	Atp2b1	.	Intron	intron_variant	0	0	-	-	-	-	2.29277	0.0049	0.001	0.423	|	-2.08845	0.001	0.00425	0.423	|	0	9	0	0	10	0	0	20	0	0	14	0	2	17	0.117647	0	8	0	|	1	13	0.0769231	0	9	0
chr10	98926476	+	A	chr10:98926476	Atp2b1	.	Intron	intron_variant	0	0	-	-	-	-	2.12065	0.0235	0.0054	0.562	|	2.08845	0.00425	0.001	0.423	|	0	9	0	0	7	0	3	19	0.157895	2	11	0.181818	1	14	0.0714286	0	5	0	|	0	15	0	0	10	0
chr10	102030844	+	A	chr10:102030844	Mgat4c	LINE	Intron	non_coding_transcript_variant	0	0	-	-	-	-	-2.38614	0.001	0.00523	0.423	|	4.05007	0.115	0.00693	0.284	|	0	10	0	1	7	0.142857	0	19	0	0	14	0	0	9	0	0	7	0	|	0	7	0	2	6	0.333333
chr10	102034403	+	A	chr10:102034403	Mgat4c	LINE	Intron	non_coding_transcript_variant	0	0	-	-	-	-	0.464106	0.005	0.00362	0.884	|	-1.95944	0.001	0.00389	0.423	|	0	13	0	0	14	0	1	21	0.047619	0	17	0	2	16	0.125	0	10	0	|	0	7	0	0	7	0
chr10	102093795	+	A	chr10:102093795	Mgat4c	LINE	Intron	non_coding_transcript_variant	0	0	-	-	-	-	2.51231	0.0243	0.00425	0.465	|	2.16878	0.0045	0.001	0.423	|	0	8	0	2	26	0.0769231	0	17	0	1	10	0.1	2	14	0.142857	0	15	0	|	0	8	0	0	11	0
chr10	102102010	+	A	chr10:102102010	Mgat4c	LINE	Intron	non_coding_transcript_variant	0	0	-	-	-	-	1.49131	0.0961	0.0342	0.622	|	5.73153	0.0531	0.001	0.184	|	0	5	0	2	14	0.142857	7	25	0.28	1	15	0.0666667	1	15	0.0666667	3	15	0.2	|	0	6	0	0	7	0
chr10	102125702	+	A	chr10:102125702	Mgat4c	LTR	Intron	non_coding_transcript_variant	0	0	-	-	-	-	-4.48857	0.00563	0.126	0.211	|	2.33274	0.212	0.042	0.486	|	2	11	0.181818	1	15	0.0666667	4	24	0.166667	0	9	0	5	28	0.178571	0	15	0	|	4	9	0.444444	0	7	0
chr10	102125914	+	A	chr10:102125914	Mgat4c	LTR	Intron	non_coding_transcript_variant	0	0	-	-	-	-	4.10219	0.367	0.0214	0.2	|	-5.54872	0.00606	0.284	0.163	|	0	19	0	1	14	0.0714286	3	22	0.136364	14	19	0.736842	15	32	0.46875	1	7	0.142857	|	4	12	0.333333	4	9	0.444444
chr10	102141540	+	A	chr10:102141540	Mgat4c	LTR	Intron	non_coding_transcript_variant	0	0	-	-	-	-	-1.88129	0.001	0.00368	0.423	|	0	0.001	0.001	---	|	0	12	0	1	20	0.05	0	14	0	0	14	0	0	14	0	0	6	0	|	0	15	0	0	7	0
chr10	102151409	+	A	chr10:102151409	Mgat4c	LINE	Intron	non_coding_transcript_variant	0	0	-	-	-	-	0.180631	0.233	0.205	0.791	|	-3.14864	0.04	0.355	0.358	|	2	9	0.222222	3	21	0.142857	3	11	0.272727	9	18	0.5	3	17	0.176471	1	7	0.142857	|	2	11	0.181818	8	13	0.615385
chr10	102151452	+	A	chr10:102151452	Mgat4c	LINE	Intron	non_coding_transcript_variant	0	0	-	-	-	-	-4.62906	0.001	0.0247	0.184	|	2.32193	0.005	0.001	0.423	|	0	9	0	3	22	0.136364	1	9	0.111111	0	16	0	0	18	0	0	5	0	|	0	11	0	0	12	0
chr10	102410769	+	A	chr10:102410769	-	.	intergenic	intergenic_variant	0	0	102411473	704	downstream	undefined	-4.35237	0.001	0.0204	0.193	|	4.7822	0.0275	0.001	0.184	|	3	16	0.1875	1	22	0.0454545	0	20	0	0	21	0	0	6	0	0	11	0	|	0	11	0	0	13	0
chr10	102410783	+	A	chr10:102410783	-	.	intergenic	intergenic_variant	0	0	102411459	676	downstream	undefined	2.63289	0.0283	0.00457	0.468	|	-2.46027	0.0055	0.0303	0.519	|	0	16	0	2	21	0.0952381	0	21	0	2	22	0.0909091	0	7	0	3	12	0.25	|	2	12	0.166667	0	12	0
chr10	106492722	+	A	chr10:106492722	Ppfia2	LTR	Intron	non_coding_transcript_variant	0	0	-	-	-	-	1.98859	0.00397	0.001	0.423	|	-0.482486	0.00368	0.00515	0.881	|	0	13	0	0	16	0	0	27	0	0	23	0	0	16	0	1	16	0.0625	|	3	22	0.136364	0	15	0
chr10	108239901	+	A	chr10:108239901	Ppp1r12a	SINE	Intron	intron_variant	0	0	-	-	-	-	1.70207	0.0149	0.00459	0.594	|	0.207163	0.00536	0.00464	0.953	|	0	16	0	0	16	0	3	31	0.0967742	1	20	0.05	0	8	0	1	15	0.0666667	|	0	7	0	1	10	0.1
chr10	108723575	-	T	chr10:108723575	Syt1	LINE	Intron	non_coding_transcript_variant	0	0	108724602	1027	upstream	intronic	1.36179	0.0167	0.00648	0.709	|	2.26529	0.00481	0.001	0.423	|	0	5	0	0	11	0	3	11	0.272727	0	16	0	1	12	0.0833333	1	18	0.0555556	|	0	11	0	0	6	0
chr10	108723577	-	T	chr10:108723577	Syt1	LINE	Intron	non_coding_transcript_variant	0	0	108724598	1021	upstream	intronic	1.89011	0.021	0.00567	0.604	|	2.75176	0.0303	0.0045	0.452	|	0	5	0	0	11	0	2	11	0.181818	0	16	0	2	12	0.166667	1	18	0.0555556	|	0	11	0	0	6	0
chr10	108723580	-	T	chr10:108723580	Syt1	LINE	Intron	non_coding_transcript_variant	0	0	108724596	1016	upstream	intronic	-5.16604	0.00415	0.149	0.116	|	-0.471679	0.0255	0.0354	0.899	|	2	5	0.4	1	11	0.0909091	1	11	0.0909091	0	19	0	1	14	0.0714286	0	19	0	|	4	15	0.266667	0	11	0
chr10	108723581	-	T	chr10:108723581	Syt1	LINE	Intron	non_coding_transcript_variant	0	0	108724595	1014	upstream	intronic	2.16915	0.0909	0.0202	0.423	|	0.0506677	0.0333	0.0322	0.989	|	0	5	0	1	11	0.0909091	1	11	0.0909091	2	20	0.1	2	14	0.142857	1	19	0.0526316	|	3	15	0.2	0	11	0
chr10	108723582	-	T	chr10:108723582	Syt1	LINE	Intron	non_coding_transcript_variant	0	0	108724594	1012	upstream	intronic	-0.495142	0.00415	0.00585	0.887	|	0	0.001	0.001	---	|	0	5	0	0	11	0	2	10	0.2	0	20	0	1	14	0.0714286	0	19	0	|	0	15	0	0	11	0
chr10	108723584	-	T	chr10:108723584	Syt1	LINE	Intron	non_coding_transcript_variant	0	0	108724592	1008	upstream	intronic	3.84193	0.0839	0.00585	0.269	|	-2.09864	0.0045	0.0193	0.529	|	0	5	0	0	12	0	2	10	0.2	1	21	0.047619	2	17	0.117647	2	19	0.105263	|	0	15	0	1	10	0.1
chr10	108723586	-	T	chr10:108723586	Syt1	LINE	Intron	non_coding_transcript_variant	0	0	108724588	1002	upstream	intronic	3.8631	0.0654	0.0045	0.215	|	4.86242	0.197	0.00679	0.217	|	0	5	0	0	13	0	1	11	0.0909091	2	21	0.0952381	1	17	0.0588235	1	20	0.05	|	5	16	0.3125	0	10	0
chr10	108723607	-	T	chr10:108723607	Syt1	LINE	Intron	non_coding_transcript_variant	0	0	108724567	960	upstream	intronic	-0.786037	0.0146	0.0251	0.811	|	0.262832	0.0045	0.00375	0.932	|	0	9	0	1	14	0.0714286	2	9	0.222222	1	19	0.0526316	1	17	0.0588235	0	20	0	|	0	17	0	0	12	0
chr10	108726423	-	T	chr10:108726423	Syt1	LINE	Intron	non_coding_transcript_variant	0	0	108724595	1828	downstream	intronic	5.94018	0.0614	0.001	0.00143	|	-1.88129	0.001	0.00368	0.423	|	0	15	0	0	12	0	0	13	0	1	18	0.0555556	1	20	0.05	1	12	0.0833333	|	0	17	0	0	6	0
chr10	108726424	-	T	chr10:108726424	Syt1	LINE	Intron	non_coding_transcript_variant	0	0	108724595	1829	downstream	intronic	3.81324	0.0141	0.001	0.184	|	0	0.001	0.001	---	|	0	15	0	0	12	0	0	13	0	1	18	0.0555556	1	20	0.05	0	12	0	|	0	17	0	0	6	0
chr10	108726429	-	T	chr10:108726429	Syt1	LINE	Intron	non_coding_transcript_variant	0	0	108724595	1834	downstream	intronic	4.05007	0.0166	0.001	0.186	|	-1.90595	0.001	0.00375	0.423	|	0	15	0	0	12	0	0	13	0	0	18	0	1	20	0.05	1	11	0.0909091	|	0	17	0	0	7	0
chr10	108807712	-	T	chr10:108807712	Syt1	.	Intron	non_coding_transcript_variant	0	0	-	-	-	-	2.19116	0.00457	0.001	0.423	|	0.845351	0.00585	0.00325	0.798	|	0	33	0	0	23	0	0	28	0	0	42	0	0	22	0	2	21	0.0952381	|	1	29	0.0344828	0	15	0
chr10	108807729	-	T	chr10:108807729	Syt1	.	Intron	non_coding_transcript_variant	0	0	-	-	-	-	-0.817906	0.00288	0.00507	0.787	|	3.88826	0.0148	0.001	0.185	|	0	35	0	3	23	0.130435	0	28	0	1	42	0.0238095	0	22	0	0	22	0	|	0	31	0	0	18	0
chr10	108810644	-	T	chr10:108810644	Syt1	.	Intron	non_coding_transcript_variant	0	0	-	-	-	-	1.85782	0.00362	0.001	0.423	|	0.038057	0.0143	0.014	0.989	|	0	18	0	0	13	0	0	34	0	0	15	0	0	17	0	1	21	0.047619	|	0	21	0	1	16	0.0625
chr10	108810646	-	T	chr10:108810646	Syt1	.	Intron	non_coding_transcript_variant	0	0	-	-	-	-	1.85782	0.00362	0.001	0.423	|	-6.06796	0.001	0.0671	0.00101	|	0	18	0	0	14	0	0	34	0	0	16	0	0	18	0	1	21	0.047619	|	1	18	0.0555556	1	16	0.0625
chr10	108810648	-	T	chr10:108810648	Syt1	.	Intron	non_coding_transcript_variant	0	0	-	-	-	-	1.85782	0.00362	0.001	0.423	|	-1.79361	0.001	0.00347	0.423	|	0	18	0	0	15	0	0	35	0	0	16	0	0	19	0	1	21	0.047619	|	0	18	0	0	16	0
chr10	108810649	-	T	chr10:108810649	Syt1	.	Intron	non_coding_transcript_variant	0	0	-	-	-	-	0	0.001	0.001	---	|	-3.7822	0.001	0.0138	0.185	|	0	15	0	0	15	0	0	35	0	0	15	0	0	19	0	0	21	0	|	1	16	0.0625	0	15	0
chr10	108810707	-	T	chr10:108810707	Syt1	.	Intron	non_coding_transcript_variant	0	0	-	-	-	-	1.88129	0.00368	0.001	0.423	|	-2.12694	0.001	0.00437	0.423	|	0	15	0	0	14	0	0	20	0	0	16	0	0	23	0	1	20	0.05	|	1	12	0.0833333	0	11	0
chr10	108842014	-	T	chr10:108842014	Syt1	LTR	Intron	non_coding_transcript_variant	0	0	108842600	586	upstream	intronic	0.173289	0.143	0.127	0.847	|	2.70445	0.231	0.0354	0.408	|	1	21	0.047619	6	25	0.24	7	39	0.179487	4	34	0.117647	3	30	0.1	5	20	0.25	|	3	9	0.333333	0	6	0
chr10	108842025	-	T	chr10:108842025	Syt1	LTR	Intron	non_coding_transcript_variant	0	0	108841458	567	downstream	Intron	3.0959	0.039	0.00457	0.293	|	0.064215	0.00523	0.005	0.986	|	0	22	0	0	27	0	4	42	0.0952381	1	30	0.0333333	1	28	0.0357143	1	20	0.05	|	0	9	0	1	8	0.125
chr10	108842075	-	T	chr10:108842075	Syt1	LTR	Intron	non_coding_transcript_variant	0	0	-	-	-	-	0.702096	0.251	0.154	0.156	|	4.71327	0.118	0.0045	0.154	|	2	20	0.1	6	28	0.214286	7	41	0.170732	5	23	0.217391	5	23	0.217391	7	21	0.333333	|	0	8	0	1	11	0.0909091
chr10	108842087	-	T	chr10:108842087	Syt1	LTR	Intron	non_coding_transcript_variant	0	0	-	-	-	-	-1.53698	0.00338	0.0098	0.558	|	1.74197	0.0672	0.0201	0.514	|	0	23	0	1	28	0.0357143	1	38	0.0263158	0	25	0	1	26	0.0384615	0	22	0	|	0	9	0	2	13	0.153846
chr10	108842488	-	T	chr10:108842488	Syt1	LTR	Intron	non_coding_transcript_variant	0	0	-	-	-	-	2.21041	0.0899	0.0194	0.421	|	0.925869	0.0083	0.00437	0.817	|	1	21	0.047619	2	13	0.153846	0	18	0	1	17	0.0588235	4	27	0.148148	1	12	0.0833333	|	0	11	0	0	7	0
chr10	108842518	-	T	chr10:108842518	Syt1	LTR	Intron	non_coding_transcript_variant	0	0	-	-	-	-	3.49829	0.0113	0.001	0.185	|	-1.81407	0.001	0.00352	0.423	|	0	20	0	0	17	0	0	22	0	1	21	0.047619	1	33	0.030303	0	14	0	|	0	16	0	0	8	0
chr10	108842520	-	T	chr10:108842520	Syt1	LTR	Intron	non_coding_transcript_variant	0	0	-	-	-	-	0.151893	0.00441	0.00397	0.961	|	1.92204	0.0189	0.005	0.578	|	0	21	0	1	16	0.0625	0	25	0	0	24	0	3	35	0.0857143	0	15	0	|	0	19	0	1	8	0.125
chr10	108842521	-	T	chr10:108842521	Syt1	LTR	Intron	non_coding_transcript_variant	0	0	-	-	-	-	1.86735	0.0179	0.0049	0.579	|	-4.42924	0.001	0.0215	0.199	|	0	20	0	2	17	0.117647	0	25	0	0	24	0	3	35	0.0857143	1	15	0.0666667	|	0	19	0	2	8	0.25
chr10	108842600	-	T	chr10:108842600	Syt1	LTR	Intron	non_coding_transcript_variant	0	0	108842014	586	downstream	intronic	-0.592536	0.0676	0.102	0.646	|	2.73911	0.0246	0.00368	0.427	|	2	30	0.0666667	3	28	0.107143	8	54	0.148148	3	45	0.0666667	1	54	0.0185185	7	28	0.25	|	0	14	0	0	10	0
chr10	108842601	-	T	chr10:108842601	Syt1	LTR	Intron	non_coding_transcript_variant	0	0	108842013	588	downstream	intronic	0.441147	0.205	0.151	0.727	|	0.0801048	0.135	0.128	0.935	|	1	28	0.0357143	10	27	0.37037	14	54	0.259259	7	45	0.155556	8	55	0.145455	11	29	0.37931	|	1	14	0.0714286	1	9	0.111111
chr10	108842602	-	T	chr10:108842602	Syt1	LTR	Intron	non_coding_transcript_variant	0	0	108842012	590	downstream	intronic	3.19391	0.0305	0.00333	0.203	|	3.92558	0.0152	0.001	0.184	|	0	30	0	0	27	0	2	54	0.037037	2	45	0.0444444	1	54	0.0185185	1	29	0.0344828	|	0	14	0	0	9	0
chr10	108842619	-	T	chr10:108842619	Syt1	LTR	Intron	non_coding_transcript_variant	0	0	108841996	623	downstream	intronic	1.99332	0.069	0.0173	0.436	|	5.04898	0.169	0.00511	0.161	|	0	30	0	2	26	0.0769231	4	59	0.0677966	2	42	0.047619	4	56	0.0714286	3	31	0.0967742	|	2	15	0.133333	0	9	0
chr10	109949515	-	T	chr10:109949515	Nav3	LINE	Intron	non_coding_transcript_variant	0	0	109950594	1079	upstream	intronic	1.77546	0.0146	0.00425	0.567	|	-0.1675	0.0049	0.0055	0.963	|	1	13	0.0769231	0	13	0	0	15	0	0	17	0	1	18	0.0555556	1	18	0.0555556	|	1	6	0.166667	0	14	0
chr10	109949518	-	T	chr10:109949518	Nav3	LINE	Intron	non_coding_transcript_variant	0	0	109950592	1074	upstream	intronic	1.90772	0.105	0.028	0.512	|	-5.70522	0.00464	0.242	0.119	|	2	13	0.153846	2	14	0.142857	0	14	0	1	16	0.0625	2	19	0.105263	3	17	0.176471	|	2	5	0.4	3	13	0.230769
chr10	109950766	-	T	chr10:109950766	Nav3	LINE	Intron	non_coding_transcript_variant	0	0	109949368	1398	downstream	intronic	2.26529	0.00481	0.001	0.423	|	2.66393	0.0331	0.00523	0.486	|	0	8	0	0	6	0	0	18	0	0	10	0	1	9	0.111111	0	9	0	|	0	5	0	1	7	0.142857
chr10	109996934	-	T	chr10:109996934	Nav3	LINE	Intron	non_coding_transcript_variant	0	0	-	-	-	-	0.873021	0.12	0.0655	0.141	|	-0.443383	0.0225	0.0306	0.903	|	1	22	0.0454545	1	18	0.0555556	3	27	0.111111	2	21	0.0952381	2	13	0.153846	2	17	0.117647	|	0	11	0	1	5	0.2
chr10	110054569	-	T	chr10:110054569	Nav3	LINE	intergenic	non_coding_transcript_variant	0	0	-	-	-	-	-0.0826425	0.00375	0.00397	0.978	|	-0.486477	0.00357	0.005	0.878	|	0	23	0	0	23	0	2	32	0.0625	0	22	0	0	16	0	1	19	0.0526316	|	2	16	0.125	0	17	0
chr10	110063048	-	T	chr10:110063048	Nav3	LTR	intergenic	non_coding_transcript_variant	0	0	110061127	1921	downstream	undefined	2.20368	0.058	0.0126	0.352	|	-2.38614	0.001	0.00523	0.423	|	0	15	0	1	25	0.04	1	20	0.05	1	15	0.0666667	1	22	0.0454545	2	31	0.0645161	|	2	14	0.142857	0	9	0
chr10	110070209	-	T	chr10:110070209	Nav3	LINE	intergenic	non_coding_transcript_variant	0	0	-	-	-	-	0	0.001	0.001	---	|	-0.368972	0.00415	0.00536	0.913	|	0	10	0	0	6	0	0	10	0	0	11	0	0	17	0	0	25	0	|	0	8	0	2	13	0.153846
chr10	110070302	-	T	chr10:110070302	Nav3	LINE	intergenic	non_coding_transcript_variant	0	0	-	-	-	-	-2.14741	0.001	0.00443	0.423	|	0.584024	0.00472	0.00315	0.845	|	0	13	0	2	23	0.0869565	0	15	0	0	12	0	0	20	0	0	15	0	|	0	7	0	0	12	0
chr10	110149658	-	T	chr10:110149658	Nav3	LINE	intergenic	non_coding_transcript_variant	0	0	-	-	-	-	-0.12399	0.0045	0.0049	0.971	|	4.03926	0.0164	0.001	0.189	|	2	17	0.117647	0	15	0	0	22	0	0	22	0	0	18	0	2	22	0.0909091	|	0	7	0	0	15	0
chr10	110149875	-	T	chr10:110149875	Nav3	LINE	intergenic	non_coding_transcript_variant	0	0	-	-	-	-	-5.51906	0.00606	0.278	0.168	|	3.03044	0.045	0.0055	0.458	|	3	12	0.25	2	7	0.285714	3	10	0.3	2	9	0.222222	0	7	0	0	10	0	|	2	12	0.166667	0	6	0
chr10	110161916	-	T	chr10:110161916	Nav3	LINE	intergenic	non_coding_transcript_variant	0	0	-	-	-	-	1.8102	0.0423	0.0121	0.429	|	2.99166	0.0239	0.003	0.196	|	0	65	0	3	45	0.0666667	2	76	0.0263158	3	64	0.046875	2	59	0.0338983	4	84	0.047619	|	0	26	0	0	21	0
chr10	110161939	-	T	chr10:110161939	Nav3	LINE	intergenic	non_coding_transcript_variant	0	0	-	-	-	-	2.75676	0.0258	0.00382	0.288	|	-0.434188	0.003	0.00405	0.874	|	0	53	0	2	36	0.0555556	0	60	0	1	50	0.02	2	44	0.0454545	1	53	0.0188679	|	0	19	0	1	15	0.0666667
chr10	110161961	-	T	chr10:110161961	Nav3	LINE	intergenic	non_coding_transcript_variant	0	0	-	-	-	-	2.41504	0.0513	0.00962	0.28	|	-1.70133	0.00425	0.0138	0.579	|	1	44	0.0227273	0	33	0	2	51	0.0392157	2	48	0.0416667	2	43	0.0465116	3	43	0.0697674	|	1	21	0.047619	1	18	0.0555556
chr10	110161990	-	T	chr10:110161990	Nav3	LINE	intergenic	non_coding_transcript_variant	0	0	-	-	-	-	0.0853827	0.0682	0.0643	0.877	|	3.98859	0.0159	0.001	0.184	|	2	44	0.0454545	4	38	0.105263	3	54	0.0555556	3	50	0.06	2	42	0.047619	5	45	0.111111	|	0	26	0	0	31	0
chr10	110161993	-	T	chr10:110161993	Nav3	LINE	intergenic	non_coding_transcript_variant	0	0	-	-	-	-	-0.660297	0.00763	0.0121	0.796	|	3.57771	0.0119	0.001	0.199	|	1	45	0.0222222	3	38	0.0789474	0	55	0	1	50	0.02	0	41	0	1	45	0.0222222	|	0	26	0	0	31	0
chr10	110162037	-	T	chr10:110162037	Nav3	LINE	intergenic	non_coding_transcript_variant	0	0	-	-	-	-	1.57407	0.0091	0.00306	0.526	|	0.344077	0.0159	0.0125	0.905	|	0	29	0	1	35	0.0285714	0	46	0	1	39	0.025641	1	34	0.0294118	0	44	0	|	1	27	0.037037	0	30	0
chr10	110162139	-	T	chr10:110162139	Nav3	LINE	intergenic	non_coding_transcript_variant	0	0	-	-	-	-	-1.97588	0.0117	0.046	0.39	|	2.78806	0.0718	0.0104	0.237	|	2	42	0.047619	2	37	0.0540541	2	53	0.0377358	0	47	0	1	40	0.025	3	47	0.0638298	|	0	17	0	1	27	0.037037
chr10	110162161	-	T	chr10:110162161	Nav3	LINE	intergenic	non_coding_transcript_variant	0	0	-	-	-	-	-1.10506	0.0108	0.0232	0.591	|	1.10318	0.035	0.0163	0.655	|	1	45	0.0222222	1	35	0.0285714	1	51	0.0196078	0	45	0	1	41	0.0243902	2	39	0.0512821	|	0	17	0	3	24	0.125
chr10	110162166	-	T	chr10:110162166	Nav3	LINE	intergenic	non_coding_transcript_variant	0	0	-	-	-	-	3.64386	0.0427	0.00342	0.17	|	2.80715	0.0799	0.0114	0.25	|	0	44	0	0	35	0	2	50	0.04	2	48	0.0416667	1	40	0.025	3	40	0.075	|	0	18	0	1	24	0.0416667
chr10	110170700	-	T	chr10:110170700	Nav3	LINE	intergenic	non_coding_transcript_variant	0	0	-	-	-	-	3.39586	0.16	0.0152	0.226	|	0.292536	0.0968	0.0791	0.706	|	0	14	0	1	21	0.047619	2	27	0.0740741	2	17	0.117647	5	22	0.227273	2	13	0.153846	|	2	22	0.0909091	1	23	0.0434783
chr10	110170842	-	T	chr10:110170842	Nav3	LINE	intergenic	non_coding_transcript_variant	0	0	-	-	-	-	-6.1007	0.001	0.0686	0.00674	|	-0.194988	0.00382	0.00437	0.949	|	1	13	0.0769231	2	17	0.117647	1	28	0.0357143	0	18	0	0	15	0	0	9	0	|	0	13	0	0	19	0
chr10	110171834	-	T	chr10:110171834	Nav3	.	intergenic	non_coding_transcript_variant	0	0	110172926	1092	upstream	undefined	-0.290559	0.00285	0.00349	0.908	|	-0.695012	0.0104	0.0168	0.806	|	2	47	0.0425532	0	49	0	0	54	0	0	29	0	1	43	0.0232558	0	39	0	|	2	28	0.0714286	1	15	0.0666667
chr10	110171876	-	T	chr10:110171876	Nav3	.	intergenic	non_coding_transcript_variant	0	0	-	-	-	-	-1.19941	0.0231	0.053	0.024	|	0.17271	0.0886	0.0786	0.842	|	2	50	0.04	4	66	0.0606061	4	65	0.0615385	1	45	0.0222222	1	44	0.0227273	1	41	0.0243902	|	3	29	0.103448	3	20	0.15
chr10	110171881	-	T	chr10:110171881	Nav3	.	intergenic	non_coding_transcript_variant	0	0	110172881	1000	upstream	undefined	-4.73128	0.001	0.0266	0.00792	|	5.44887	0.0437	0.001	0.00589	|	2	49	0.0408163	2	66	0.030303	1	66	0.0151515	0	44	0	0	43	0	0	41	0	|	0	26	0	0	20	0
chr10	110171888	-	T	chr10:110171888	Nav3	.	intergenic	non_coding_transcript_variant	0	0	-	-	-	-	-3.68645	0.001	0.0129	0.19	|	0.582197	0.106	0.0707	0.498	|	0	49	0	5	66	0.0757576	2	71	0.028169	0	44	0	0	46	0	0	40	0	|	4	29	0.137931	2	23	0.0869565
chr10	110171917	-	T	chr10:110171917	Nav3	.	intergenic	non_coding_transcript_variant	0	0	110172846	929	upstream	undefined	-1.80749	0.0111	0.039	0.408	|	1.88063	0.0411	0.0112	0.397	|	3	71	0.0422535	3	88	0.0340909	4	97	0.0412371	3	76	0.0394737	0	60	0	2	57	0.0350877	|	1	32	0.03125	0	31	0
chr10	110171920	-	T	chr10:110171920	Nav3	.	intergenic	non_coding_transcript_variant	0	0	110172843	923	upstream	undefined	-1.26869	0.00721	0.0174	0.481	|	-1.80137	0.01	0.0349	0.413	|	1	80	0.0125	2	91	0.021978	2	105	0.0190476	1	81	0.0123457	2	66	0.030303	0	59	0	|	2	31	0.0645161	1	33	0.030303
chr10	110171921	-	T	chr10:110171921	Nav3	.	intergenic	non_coding_transcript_variant	0	0	110172842	921	upstream	undefined	-2.32867	0.00724	0.0364	0.244	|	2.30702	0.0619	0.0125	0.343	|	3	80	0.0375	2	89	0.0224719	6	105	0.0571429	2	81	0.0246914	1	65	0.0153846	0	59	0	|	2	31	0.0645161	1	33	0.030303
chr10	110171922	-	T	chr10:110171922	Nav3	.	intergenic	non_coding_transcript_variant	0	0	110172841	919	upstream	undefined	-0.153853	0.034	0.0378	0.845	|	2.31736	0.0623	0.0125	0.34	|	5	80	0.0625	4	88	0.0454545	2	105	0.0190476	3	81	0.037037	4	65	0.0615385	1	58	0.0172414	|	2	31	0.0645161	1	33	0.030303
chr10	110172876	-	T	chr10:110172876	Nav3	.	intergenic	non_coding_transcript_variant	0	0	-	-	-	-	-2.76132	0.00905	0.0613	0.225	|	0.391208	0.0729	0.0556	0.291	|	2	63	0.031746	8	50	0.16	4	88	0.0454545	1	54	0.0185185	2	50	0.04	0	55	0	|	3	40	0.075	2	46	0.0434783
chr10	110172883	-	T	chr10:110172883	Nav3	.	intergenic	non_coding_transcript_variant	0	0	110171879	1004	downstream	undefined	-3.91065	0.00254	0.0382	0.0992	|	-2.25407	0.00913	0.0436	0.307	|	2	62	0.0322581	2	52	0.0384615	4	89	0.0449438	1	61	0.0163934	0	51	0	0	58	0	|	1	40	0.025	2	49	0.0408163
chr10	110172886	-	T	chr10:110172886	Nav3	.	intergenic	non_coding_transcript_variant	0	0	-	-	-	-	-0.806934	0.00863	0.0151	0.659	|	2.49491	0.0504	0.00894	0.252	|	1	63	0.015873	1	53	0.0188679	1	87	0.0114943	0	62	0	1	51	0.0196078	2	61	0.0327869	|	1	40	0.025	0	50	0
chr10	110172893	-	T	chr10:110172893	Nav3	.	intergenic	non_coding_transcript_variant	0	0	-	-	-	-	1.3372	0.00847	0.00335	0.599	|	1.97735	0.0538	0.0137	0.413	|	0	66	0	2	53	0.0377358	0	82	0	2	62	0.0322581	1	53	0.0188679	0	61	0	|	3	38	0.0789474	0	49	0
chr10	110177946	-	T	chr10:110177946	Nav3	LINE	intergenic	non_coding_transcript_variant	0	0	-	-	-	-	-1.79361	0.001	0.00347	0.423	|	0	0.001	0.001	---	|	1	24	0.0416667	0	27	0	0	24	0	0	19	0	0	22	0	0	16	0	|	0	11	0	0	13	0
chr10	110181874	-	T	chr10:110181874	Nav3	DNA	intergenic	non_coding_transcript_variant	0	0	110183296	1422	upstream	undefined	2.00997	0.0395	0.0098	0.347	|	0.514381	0.00441	0.00309	0.858	|	1	38	0.0263158	1	28	0.0357143	0	56	0	2	59	0.0338983	3	46	0.0652174	1	36	0.0277778	|	0	20	0	0	22	0
chr10	110181877	-	T	chr10:110181877	Nav3	DNA	intergenic	non_coding_transcript_variant	0	0	110183290	1413	upstream	undefined	-4.18939	0.001	0.0182	0.184	|	3.49345	0.0113	0.001	0.189	|	3	38	0.0789474	2	26	0.0769231	0	57	0	0	59	0	0	47	0	0	38	0	|	0	20	0	0	22	0
chr10	110181882	-	T	chr10:110181882	Nav3	DNA	intergenic	non_coding_transcript_variant	1	1	110183285	1403	upstream	undefined	-0.347192	0.0351	0.0446	0.716	|	1.92176	0.0116	0.00306	0.472	|	1	40	0.025	2	23	0.0869565	2	49	0.0408163	1	57	0.0175439	4	44	0.0909091	1	37	0.027027	|	0	19	0	0	23	0
chr10	110181885	-	T	chr10:110181885	Nav3	DNA	intergenic	non_coding_transcript_variant	1	1	110183283	1398	upstream	undefined	-1.71113	0.0135	0.044	0.458	|	1.92438	0.0116	0.00306	0.468	|	2	39	0.0512821	1	25	0.04	2	48	0.0416667	3	56	0.0535714	2	44	0.0454545	0	36	0	|	0	19	0	0	23	0
chr10	110181889	-	T	chr10:110181889	Nav3	DNA	intergenic	non_coding_transcript_variant	0	0	110183279	1390	upstream	undefined	-1.8354	0.00841	0.03	0.357	|	1.42747	0.0129	0.00481	0.652	|	1	35	0.0285714	1	23	0.0434783	1	46	0.0217391	1	51	0.0196078	0	40	0	1	33	0.030303	|	2	18	0.111111	0	22	0
chr10	110181892	-	T	chr10:110181892	Nav3	DNA	intergenic	non_coding_transcript_variant	1	1	-	-	-	-	2.31095	0.0962	0.0194	0.395	|	-1.93195	0.001	0.00382	0.423	|	4	35	0.114286	0	24	0	3	47	0.0638298	5	51	0.0980392	4	40	0.1	3	33	0.0909091	|	1	18	0.0555556	0	21	0
chr10	110181898	-	T	chr10:110181898	Nav3	DNA	intergenic	non_coding_transcript_variant	0	0	-	-	-	-	0.650689	0.0187	0.0119	0.829	|	3.91527	0.0466	0.00309	0.13	|	3	37	0.0810811	0	26	0	1	48	0.0208333	4	54	0.0740741	0	40	0	3	34	0.0882353	|	0	20	0	0	20	0
chr10	110181913	-	T	chr10:110181913	Nav3	DNA	intergenic	non_coding_transcript_variant	0	0	-	-	-	-	0.938164	0.0451	0.0235	0.304	|	1.82418	0.0125	0.00352	0.518	|	1	42	0.0238095	1	32	0.03125	1	57	0.0175439	1	55	0.0181818	4	44	0.0909091	2	36	0.0555556	|	1	23	0.0434783	0	24	0
chr10	110181931	-	T	chr10:110181931	Nav3	DNA	intergenic	non_coding_transcript_variant	0	0	-	-	-	-	1.59762	0.0111	0.00368	0.569	|	0.715017	0.0169	0.0103	0.801	|	0	41	0	2	40	0.05	0	58	0	0	52	0	2	39	0.0512821	1	37	0.027027	|	0	22	0	1	23	0.0434783
chr10	110183249	-	T	chr10:110183249	Nav3	DNA	intergenic	non_coding_transcript_variant	0	0	-	-	-	-	-0.121454	0.0237	0.0258	0.888	|	1.18056	0.024	0.0106	0.578	|	3	69	0.0434783	2	62	0.0322581	1	82	0.0121951	1	63	0.015873	1	64	0.015625	3	56	0.0535714	|	2	30	0.0666667	0	25	0
chr10	110183262	-	T	chr10:110183262	Nav3	DNA	intergenic	non_coding_transcript_variant	0	0	110181904	1358	downstream	undefined	1.05345	0.021	0.0101	0.599	|	0.152663	0.0154	0.0139	0.959	|	3	67	0.0447761	0	60	0	2	86	0.0232558	1	62	0.016129	2	63	0.031746	1	55	0.0181818	|	1	30	0.0333333	2	25	0.08
chr10	110183265	-	T	chr10:110183265	Nav3	DNA	intergenic	non_coding_transcript_variant	0	0	110181902	1363	downstream	undefined	-2.97539	0.00263	0.0207	0.155	|	0.257125	0.00373	0.00312	0.923	|	3	68	0.0441176	1	58	0.0172414	1	86	0.0116279	0	63	0	0	64	0	1	55	0.0181818	|	1	33	0.030303	0	24	0
chr10	110183271	-	T	chr10:110183271	Nav3	DNA	intergenic	non_coding_transcript_variant	0	0	110181898	1373	downstream	undefined	-0.515029	0.0298	0.0426	0.565	|	-1.50116	0.0379	0.107	0.201	|	3	55	0.0545455	3	55	0.0545455	2	77	0.025974	1	57	0.0175439	1	53	0.0188679	4	50	0.08	|	1	29	0.0344828	4	21	0.190476
chr10	110183276	-	T	chr10:110183276	Nav3	DNA	intergenic	non_coding_transcript_variant	0	0	110184661	1385	upstream	intergenic	1.63789	0.095	0.0305	0.248	|	-1.96256	0.013	0.0507	0.41	|	7	56	0.125	1	55	0.0181818	1	80	0.0125	8	55	0.145455	3	52	0.0576923	5	49	0.102041	|	1	29	0.0344828	1	20	0.05
chr10	110183286	-	T	chr10:110183286	Nav3	DNA	intergenic	non_coding_transcript_variant	0	0	110181881	1405	downstream	undefined	-0.402268	0.0279	0.0369	0.633	|	-0.377041	0.00835	0.0108	0.882	|	1	55	0.0181818	4	55	0.0727273	3	79	0.0379747	3	52	0.0576923	1	51	0.0196078	1	52	0.0192308	|	2	29	0.0689655	0	20	0
chr10	110183299	-	T	chr10:110183299	Nav3	DNA	intergenic	non_coding_transcript_variant	0	0	110181870	1429	downstream	undefined	-0.986193	0.0188	0.0373	0.688	|	-0.655133	0.0187	0.0295	0.851	|	2	44	0.0454545	2	48	0.0416667	2	73	0.0273973	4	47	0.0851064	0	50	0	4	51	0.0784314	|	8	29	0.275862	0	17	0
chr10	110184592	-	T	chr10:110184592	Nav3	SINE	intergenic	non_coding_transcript_variant	0	0	110186291	1699	upstream	undefined	1.49293	0.0439	0.0156	0.54	|	-0.0125277	0.0142	0.0143	0.997	|	0	31	0	2	22	0.0909091	2	48	0.0416667	3	37	0.0810811	1	48	0.0208333	2	40	0.05	|	0	13	0	1	11	0.0909091
chr10	110184608	-	T	chr10:110184608	Nav3	SINE	intergenic	non_coding_transcript_variant	1	1	110186276	1668	upstream	undefined	0.0615389	0.0509	0.0487	0.948	|	2.35647	0.0588	0.0115	0.314	|	1	40	0.025	1	32	0.03125	8	54	0.148148	4	53	0.0754717	2	51	0.0392157	2	45	0.0444444	|	1	20	0.05	0	14	0
chr10	110184632	-	T	chr10:110184632	Nav3	.	intergenic	non_coding_transcript_variant	0	0	-	-	-	-	1.54819	0.0346	0.0118	0.483	|	1.83712	0.0575	0.0161	0.473	|	0	42	0	1	36	0.0277778	4	67	0.0597015	2	48	0.0416667	2	49	0.0408163	1	41	0.0243902	|	0	21	0	2	15	0.133333
chr10	110184633	-	T	chr10:110184633	Nav3	.	intergenic	non_coding_transcript_variant	0	0	-	-	-	-	0.693053	0.0962	0.0595	0.455	|	0.212477	0.144	0.124	0.8	|	1	42	0.0238095	3	36	0.0833333	7	66	0.106061	7	48	0.145833	6	48	0.125	2	41	0.0487805	|	1	21	0.047619	3	14	0.214286
chr10	110184634	-	T	chr10:110184634	Nav3	.	intergenic	non_coding_transcript_variant	0	0	-	-	-	-	1.68755	0.0688	0.0214	0.528	|	-2.2432	0.0162	0.0768	0.41	|	3	42	0.0714286	0	35	0	9	66	0.136364	5	48	0.104167	3	48	0.0625	2	40	0.05	|	2	21	0.0952381	2	14	0.142857
chr10	110184635	-	T	chr10:110184635	Nav3	.	intergenic	non_coding_transcript_variant	1	1	-	-	-	-	-0.325117	0.224	0.281	0.558	|	0.44001	0.214	0.158	0.641	|	9	40	0.225	9	34	0.264706	25	67	0.373134	17	48	0.354167	12	47	0.255319	5	40	0.125	|	9	21	0.428571	2	14	0.142857
chr10	110184643	-	T	chr10:110184643	Nav3	.	intergenic	non_coding_transcript_variant	1	1	-	-	-	-	-0.0526236	0.552	0.573	0.807	|	0.610927	0.424	0.278	0.33	|	21	38	0.552632	18	35	0.514286	45	68	0.661765	32	50	0.64	27	45	0.6	18	41	0.439024	|	8	21	0.380952	2	14	0.142857
chr10	110184664	-	T	chr10:110184664	Nav3	.	intergenic	non_coding_transcript_variant	1	1	-	-	-	-	-0.052262	0.166	0.172	0.841	|	-0.159235	0.199	0.222	0.669	|	5	31	0.16129	5	34	0.147059	12	56	0.214286	10	47	0.212766	6	40	0.15	4	28	0.142857	|	6	21	0.285714	3	12	0.25
chr10	110184669	-	T	chr10:110184669	Nav3	.	intergenic	non_coding_transcript_variant	1	1	-	-	-	-	0.29166	0.576	0.47	0.311	|	0.0826044	0.479	0.452	0.833	|	14	31	0.451613	13	35	0.371429	36	58	0.62069	29	45	0.644444	20	35	0.571429	14	27	0.518519	|	10	20	0.5	6	15	0.4
chr10	110184676	-	T	chr10:110184676	Nav3	.	intergenic	non_coding_transcript_variant	1	1	-	-	-	-	0.296824	0.205	0.167	0.518	|	-0.153305	0.122	0.136	0.873	|	3	30	0.1	7	36	0.194444	15	63	0.238095	9	44	0.204545	6	33	0.181818	6	26	0.230769	|	1	20	0.05	4	17	0.235294
chr10	110184679	-	T	chr10:110184679	Nav3	.	intergenic	non_coding_transcript_variant	0	0	-	-	-	-	-1.43535	0.00349	0.00944	0.586	|	0.137474	0.0134	0.0122	0.961	|	0	36	0	1	36	0.0277778	2	66	0.030303	2	47	0.0425532	0	34	0	0	28	0	|	0	21	0	1	19	0.0526316
chr10	110186222	-	T	chr10:110186222	Nav3	.	intergenic	non_coding_transcript_variant	0	0	-	-	-	-	-0.330871	0.442	0.556	0.367	|	0.268231	0.589	0.489	0.273	|	33	64	0.515625	27	54	0.5	46	69	0.666667	24	42	0.571429	13	43	0.302326	17	34	0.5	|	16	27	0.592593	15	30	0.5
chr10	110186225	-	T	chr10:110186225	Nav3	.	intergenic	non_coding_transcript_variant	0	0	-	-	-	-	-0.0931347	0.0517	0.0552	0.889	|	-3.39001	0.001	0.0105	0.184	|	5	64	0.078125	2	54	0.037037	4	69	0.057971	1	40	0.025	3	44	0.0681818	3	37	0.0810811	|	1	28	0.0357143	1	31	0.0322581
chr10	110186242	-	T	chr10:110186242	Nav3	SINE	intergenic	non_coding_transcript_variant	0	0	-	-	-	-	-1.04962	0.121	0.251	0.0161	|	-0.707934	0.0902	0.147	0.387	|	19	72	0.263889	14	66	0.212121	22	78	0.282051	7	44	0.159091	6	55	0.109091	4	39	0.102564	|	2	29	0.0689655	5	35	0.142857
chr10	110186246	-	T	chr10:110186246	Nav3	SINE	intergenic	non_coding_transcript_variant	0	0	-	-	-	-	4.42552	0.0732	0.0034	0.129	|	4.28894	0.0776	0.00397	0.161	|	0	65	0	0	64	0	3	76	0.0394737	3	46	0.0652174	4	54	0.0740741	3	37	0.0810811	|	0	29	0	2	32	0.0625
chr10	110186250	-	T	chr10:110186250	Nav3	SINE	intergenic	non_coding_transcript_variant	0	0	-	-	-	-	0.0449331	0.434	0.42	0.806	|	0.306495	0.474	0.383	0.44	|	28	65	0.430769	31	66	0.469697	29	79	0.367089	20	46	0.434783	28	55	0.509091	14	38	0.368421	|	12	28	0.428571	8	32	0.25
chr10	110186251	-	T	chr10:110186251	Nav3	SINE	intergenic	non_coding_transcript_variant	0	0	-	-	-	-	-0.564174	0.182	0.268	0.271	|	-0.158216	0.172	0.192	0.822	|	18	64	0.28125	16	64	0.25	22	80	0.275	5	46	0.108696	14	55	0.254545	8	37	0.216216	|	5	28	0.178571	3	31	0.0967742
chr10	110186261	-	T	chr10:110186261	Nav3	SINE	intergenic	non_coding_transcript_variant	0	0	-	-	-	-	-0.12659	0.406	0.443	0.532	|	-0.206688	0.423	0.488	0.544	|	32	63	0.507937	23	59	0.389831	32	73	0.438356	25	51	0.490196	19	55	0.345455	13	33	0.393939	|	12	26	0.461538	14	27	0.518519
chr10	110186265	-	T	chr10:110186265	Nav3	SINE	intergenic	non_coding_transcript_variant	0	0	-	-	-	-	-0.0645536	0.564	0.59	0.746	|	0.0723494	0.611	0.581	0.575	|	42	63	0.666667	36	56	0.642857	34	71	0.478873	32	49	0.653061	30	58	0.517241	17	32	0.53125	|	15	26	0.576923	15	27	0.555556
chr10	110186267	-	T	chr10:110186267	Nav3	SINE	intergenic	non_coding_transcript_variant	0	0	-	-	-	-	-1.17562	0.0174	0.0394	0.636	|	-0.732132	0.0131	0.0217	0.815	|	1	65	0.0153846	5	54	0.0925926	3	70	0.0428571	0	49	0	5	59	0.0847458	2	32	0.0625	|	0	24	0	2	27	0.0740741
chr10	110186273	-	T	chr10:110186273	Nav3	SINE	intergenic	non_coding_transcript_variant	0	0	110184611	1662	downstream	undefined	0.145976	0.138	0.124	0.83	|	0.429198	0.119	0.0882	0.606	|	9	66	0.136364	10	53	0.188679	5	67	0.0746269	8	51	0.156863	13	56	0.232143	2	28	0.0714286	|	3	23	0.130435	1	25	0.04
chr10	110186284	-	T	chr10:110186284	Nav3	SINE	intergenic	non_coding_transcript_variant	0	0	110184597	1687	downstream	undefined	-0.216176	0.0493	0.0573	0.819	|	-0.681325	0.0211	0.0338	0.787	|	6	64	0.09375	1	54	0.0185185	8	74	0.108108	2	54	0.037037	3	58	0.0517241	2	32	0.0625	|	1	24	0.0416667	1	27	0.037037
chr10	110186292	-	T	chr10:110186292	Nav3	SINE	intergenic	non_coding_transcript_variant	0	0	110184591	1701	downstream	undefined	-0.38984	0.146	0.191	0.605	|	0.371614	0.178	0.137	0.538	|	11	60	0.183333	12	46	0.26087	9	62	0.145161	7	51	0.137255	17	54	0.314815	2	28	0.0714286	|	3	25	0.12	5	25	0.2
chr10	110186293	-	T	chr10:110186293	Nav3	SINE	intergenic	non_coding_transcript_variant	0	0	110184590	1703	downstream	undefined	0.44778	0.108	0.0795	0.586	|	1.38041	0.0706	0.0271	0.63	|	2	60	0.0333333	6	45	0.133333	7	62	0.112903	5	51	0.0980392	10	55	0.181818	2	28	0.0714286	|	0	25	0	7	27	0.259259
chr10	110186298	-	T	chr10:110186298	Nav3	SINE	intergenic	non_coding_transcript_variant	0	0	110184585	1713	downstream	undefined	-0.0593958	0.0509	0.053	0.952	|	-1.97896	0.0127	0.0501	0.404	|	7	59	0.118644	3	45	0.0666667	1	53	0.0188679	5	52	0.0961538	2	54	0.037037	1	27	0.037037	|	1	25	0.04	1	28	0.0357143
chr10	110186304	-	T	chr10:110186304	Nav3	SINE	intergenic	non_coding_transcript_variant	0	0	110184581	1723	downstream	undefined	-0.0979511	0.411	0.44	0.767	|	-0.477004	0.312	0.434	0.114	|	22	61	0.360656	18	44	0.409091	30	52	0.576923	23	52	0.442308	16	53	0.301887	13	25	0.52	|	13	26	0.5	12	29	0.413793
chr10	110186305	-	T	chr10:110186305	Nav3	SINE	intergenic	non_coding_transcript_variant	0	0	110184579	1726	downstream	undefined	-0.128776	0.733	0.801	0.212	|	0.115436	0.733	0.677	0.711	|	45	60	0.75	35	44	0.795455	44	51	0.862745	38	52	0.730769	42	53	0.792453	17	25	0.68	|	18	26	0.692308	19	29	0.655172
chr10	110186306	-	T	chr10:110186306	Nav3	SINE	intergenic	non_coding_transcript_variant	0	0	110184579	1727	downstream	undefined	-0.142815	0.641	0.707	0.538	|	-0.193907	0.597	0.683	0.636	|	47	60	0.783333	26	44	0.590909	39	51	0.764706	34	52	0.653846	41	53	0.773585	13	25	0.52	|	19	26	0.730769	17	29	0.586207
chr10	110186307	-	T	chr10:110186307	Nav3	SINE	intergenic	non_coding_transcript_variant	0	0	110184579	1728	downstream	undefined	-0.136954	0.355	0.39	0.829	|	-0.137744	0.243	0.267	0.829	|	26	60	0.433333	14	44	0.318182	22	51	0.431373	26	53	0.490566	29	53	0.54717	4	24	0.166667	|	5	25	0.2	8	28	0.285714
chr10	110210102	-	T	chr10:110210102	Nav3	LINE	intergenic	non_coding_transcript_variant	0	0	-	-	-	-	-1.40306	0.0193	0.0509	0.581	|	1.52899	0.0552	0.0191	0.558	|	2	36	0.0555556	1	33	0.030303	4	51	0.0784314	3	41	0.0731707	4	41	0.097561	0	31	0	|	0	28	0	2	13	0.153846
chr10	110210111	-	T	chr10:110210111	Nav3	LINE	intergenic	non_coding_transcript_variant	0	0	-	-	-	-	-1.99751	0.0119	0.0477	0.387	|	-0.900147	0.0111	0.0207	0.767	|	2	41	0.0487805	1	34	0.0294118	4	53	0.0754717	0	44	0	3	49	0.0612245	1	36	0.0277778	|	0	37	0	2	14	0.142857
chr10	110210125	-	T	chr10:110210125	Nav3	LINE	intergenic	non_coding_transcript_variant	0	0	-	-	-	-	-0.618517	0.0315	0.0484	0.401	|	1.63886	0.06	0.0193	0.525	|	3	44	0.0681818	1	34	0.0294118	3	53	0.0566038	3	47	0.0638298	1	55	0.0181818	1	37	0.027027	|	3	42	0.0714286	0	14	0
chr10	110210310	-	T	chr10:110210310	Nav3	LINE	intergenic	non_coding_transcript_variant	0	0	110207921	2389	downstream	undefined	-0.317004	0.00818	0.0102	0.897	|	0.0442981	0.0108	0.0105	0.987	|	2	37	0.0540541	0	39	0	1	51	0.0196078	1	38	0.0263158	1	48	0.0208333	0	25	0	|	0	34	0	2	35	0.0571429
chr10	110259827	-	T	chr10:110259827	Nav3	LTR	intergenic	non_coding_transcript_variant	0	0	-	-	-	-	-0.366512	0.00405	0.00523	0.912	|	0	0.00464	0.00464	1	|	1	7	0.142857	0	15	0	0	9	0	1	15	0.0666667	0	17	0	0	7	0	|	1	10	0.1	0	8	0
chr10	110259829	-	T	chr10:110259829	Nav3	LTR	intergenic	non_coding_transcript_variant	0	0	-	-	-	-	2.01963	0.00405	0.001	0.423	|	-2.12694	0.001	0.00437	0.423	|	0	7	0	0	14	0	0	9	0	1	15	0.0666667	0	17	0	0	9	0	|	0	10	0	0	8	0
chr10	110259842	-	T	chr10:110259842	Nav3	LTR	intergenic	non_coding_transcript_variant	0	0	-	-	-	-	1.71948	0.0172	0.00523	0.615	|	0.269118	0.0347	0.0288	0.943	|	1	7	0.142857	0	15	0	0	9	0	1	14	0.0714286	1	14	0.0714286	0	10	0	|	0	10	0	2	7	0.285714
chr10	110259865	-	T	chr10:110259865	Nav3	LTR	intergenic	non_coding_transcript_variant	0	0	-	-	-	-	1.99617	0.0199	0.005	0.564	|	0.971704	0.0485	0.0247	0.804	|	1	8	0.125	0	13	0	0	7	0	1	14	0.0714286	2	18	0.111111	0	10	0	|	2	11	0.181818	0	7	0
chr10	110312452	-	T	chr10:110312452	Nav3	LTR	intergenic	non_coding_transcript_variant	0	0	110313339	887	upstream	undefined	-0.807124	0.0927	0.162	0.0599	|	-0.75656	0.0972	0.164	0.484	|	4	30	0.133333	8	40	0.2	8	50	0.16	4	31	0.129032	3	36	0.0833333	2	27	0.0740741	|	3	30	0.1	4	19	0.210526
chr10	110312455	-	T	chr10:110312455	Nav3	LTR	intergenic	non_coding_transcript_variant	0	0	110313336	881	upstream	undefined	-3.08236	0.00306	0.0259	0.194	|	-1.71948	0.001	0.00329	0.423	|	1	30	0.0333333	1	40	0.025	1	48	0.0208333	0	32	0	1	35	0.0285714	0	27	0	|	1	28	0.0357143	0	18	0
chr10	110312554	-	T	chr10:110312554	Nav3	LTR	intergenic	non_coding_transcript_variant	0	0	-	-	-	-	1.38896	0.0114	0.00434	0.641	|	2.32193	0.005	0.001	0.423	|	0	29	0	0	39	0	4	49	0.0816327	1	31	0.0322581	1	22	0.0454545	0	29	0	|	0	27	0	0	19	0
chr10	110312569	-	T	chr10:110312569	Nav3	LTR	intergenic	non_coding_transcript_variant	0	0	110313204	635	upstream	undefined	3.72334	0.0132	0.001	0.188	|	1.70593	0.0112	0.00342	0.532	|	0	34	0	0	38	0	0	53	0	1	31	0.0322581	2	28	0.0714286	0	35	0	|	0	29	0	0	21	0
chr10	110312585	-	T	chr10:110312585	Nav3	LTR	intergenic	non_coding_transcript_variant	0	0	110313187	602	upstream	undefined	0.615498	0.0128	0.00833	0.812	|	-0.517918	0.00944	0.0135	0.846	|	1	36	0.0277778	0	40	0	1	48	0.0208333	1	31	0.0322581	2	31	0.0645161	0	40	0	|	1	27	0.037037	0	23	0
chr10	110312588	-	T	chr10:110312588	Nav3	LTR	intergenic	non_coding_transcript_variant	0	0	110313185	597	upstream	undefined	-0.065073	0.00962	0.0101	0.979	|	-2.02446	0.00368	0.015	0.505	|	1	40	0.025	0	41	0	2	49	0.0408163	1	34	0.0294118	1	33	0.030303	0	41	0	|	3	27	0.111111	0	23	0
chr10	110312589	-	T	chr10:110312589	Nav3	LTR	intergenic	non_coding_transcript_variant	0	0	110313184	595	upstream	undefined	-0.256851	0.0352	0.0421	0.669	|	-2.49614	0.00368	0.0208	0.441	|	2	40	0.05	1	41	0.0243902	3	49	0.0612245	2	34	0.0588235	1	32	0.03125	1	42	0.0238095	|	4	27	0.148148	0	23	0
chr10	110312592	-	T	chr10:110312592	Nav3	LTR	intergenic	non_coding_transcript_variant	0	0	110313180	588	upstream	undefined	-1.86315	0.0134	0.0486	0.448	|	1.80245	0.0138	0.00397	0.55	|	2	41	0.0487805	4	37	0.108108	1	46	0.0217391	0	35	0	3	30	0.1	1	42	0.0238095	|	0	27	0	0	25	0
chr10	110312602	-	T	chr10:110312602	Nav3	LTR	intergenic	non_coding_transcript_variant	0	0	-	-	-	-	0.00991578	0.00275	0.00273	0.996	|	1.54795	0.00292	0.001	0.423	|	0	44	0	0	36	0	1	49	0.0204082	0	42	0	0	34	0	1	48	0.0208333	|	0	32	0	0	27	0
chr10	110312603	-	T	chr10:110312603	Nav3	LTR	intergenic	non_coding_transcript_variant	0	0	-	-	-	-	-0.689038	0.0125	0.0201	0.823	|	2.78752	0.0217	0.00315	0.376	|	5	49	0.102041	0	38	0	4	50	0.08	1	44	0.0227273	3	35	0.0857143	0	53	0	|	1	32	0.03125	0	28	0
chr10	110312619	-	T	chr10:110312619	Nav3	LTR	intergenic	non_coding_transcript_variant	0	0	110313154	535	upstream	undefined	2.98371	0.0272	0.00344	0.232	|	1.58898	0.0104	0.00347	0.557	|	0	52	0	0	42	0	2	49	0.0408163	1	50	0.02	2	36	0.0555556	1	55	0.0181818	|	0	33	0	0	30	0
chr10	110312627	-	T	chr10:110312627	Nav3	LTR	intergenic	non_coding_transcript_variant	0	0	-	-	-	-	-0.243252	0.0537	0.0635	0.807	|	-0.0242807	0.0945	0.0961	0.964	|	4	50	0.08	2	39	0.0512821	3	48	0.0625	3	46	0.0652174	5	37	0.135135	1	57	0.0175439	|	3	30	0.1	2	30	0.0666667
chr10	110312654	-	T	chr10:110312654	Nav3	LTR	intergenic	non_coding_transcript_variant	0	0	-	-	-	-	-3.50987	0.001	0.0114	0.185	|	-1.61677	0.00303	0.00929	0.518	|	2	41	0.0487805	1	33	0.030303	0	50	0	0	39	0	0	36	0	0	48	0	|	1	26	0.0384615	0	26	0
chr10	110313096	-	T	chr10:110313096	Nav3	LTR	intergenic	non_coding_transcript_variant	0	0	110312677	419	downstream	undefined	-0.263516	0.00315	0.00378	0.922	|	-1.85782	0.00382	0.0138	0.53	|	2	37	0.0540541	0	34	0	0	55	0	0	36	0	0	32	0	1	32	0.03125	|	1	21	0.047619	1	18	0.0555556
chr10	110313147	-	T	chr10:110313147	Nav3	LTR	intergenic	non_coding_transcript_variant	0	0	-	-	-	-	1.83413	0.0314	0.00882	0.369	|	1.79361	0.00347	0.001	0.423	|	0	33	0	1	27	0.037037	1	54	0.0185185	2	43	0.0465116	1	44	0.0227273	1	34	0.0294118	|	0	20	0	0	18	0
chr10	110313153	-	T	chr10:110313153	Nav3	LTR	intergenic	non_coding_transcript_variant	0	0	110312619	534	downstream	undefined	0.315055	0.0152	0.0122	0.912	|	-3.94627	0.001	0.0154	0.185	|	0	35	0	1	28	0.0357143	3	59	0.0508475	3	39	0.0769231	2	44	0.0454545	0	35	0	|	1	21	0.047619	0	19	0
chr10	110313161	-	T	chr10:110313161	Nav3	LTR	intergenic	non_coding_transcript_variant	0	0	110313708	547	upstream	intergenic	1.78043	0.0115	0.00333	0.514	|	-2.23929	0.001	0.00472	0.423	|	0	33	0	1	27	0.037037	0	53	0	1	37	0.027027	2	36	0.0555556	0	29	0	|	0	18	0	2	19	0.105263
chr10	110313171	-	T	chr10:110313171	Nav3	LTR	intergenic	non_coding_transcript_variant	0	0	110313738	567	upstream	intergenic	-1.38347	0.00315	0.00822	0.573	|	1.34031	0.0118	0.00464	0.663	|	1	34	0.0294118	0	28	0	1	53	0.0188679	0	36	0	0	37	0	1	32	0.03125	|	0	17	0	2	20	0.1
chr10	110313241	-	T	chr10:110313241	Nav3	LTR	intergenic	non_coding_transcript_variant	0	0	-	-	-	-	-0.0506677	0.0117	0.0121	0.985	|	1.91801	0.0185	0.0049	0.584	|	0	33	0	1	31	0.0322581	2	36	0.0555556	1	31	0.0322581	0	40	0	1	20	0.05	|	2	17	0.117647	0	20	0
chr10	110313256	-	T	chr10:110313256	Nav3	LTR	intergenic	non_coding_transcript_variant	0	0	110312757	499	downstream	undefined	-4.2827	0.0045	0.0875	0.184	|	-5.76357	0.001	0.0543	0.000311	|	3	33	0.0909091	4	31	0.129032	2	35	0.0571429	3	33	0.0909091	0	37	0	0	18	0	|	1	18	0.0555556	1	21	0.047619
chr10	110313368	-	T	chr10:110313368	Nav3	LTR	intergenic	non_coding_transcript_variant	0	0	110312435	933	downstream	undefined	2.09541	0.0646	0.0151	0.399	|	0.080336	0.00567	0.00536	0.983	|	1	17	0.0588235	1	17	0.0588235	0	30	0	1	23	0.0434783	2	14	0.142857	1	23	0.0434783	|	2	13	0.153846	0	8	0
chr10	110313371	-	T	chr10:110313371	Nav3	LTR	intergenic	non_coding_transcript_variant	0	0	110312432	939	downstream	undefined	-0.12399	0.00357	0.00389	0.965	|	2.16878	0.0045	0.001	0.423	|	0	16	0	1	17	0.0588235	0	26	0	1	22	0.0454545	0	13	0	0	24	0	|	0	13	0	0	7	0
chr10	110313384	-	T	chr10:110313384	Nav3	LTR	intergenic	non_coding_transcript_variant	0	0	-	-	-	-	-1.75821	0.034	0.115	0.565	|	-0.733878	0.0188	0.0313	0.836	|	2	20	0.1	3	19	0.157895	3	31	0.0967742	0	24	0	6	19	0.315789	4	32	0.125	|	2	13	0.153846	1	5	0.2
chr10	110313389	-	T	chr10:110313389	Nav3	LTR	intergenic	non_coding_transcript_variant	0	0	-	-	-	-	-2.65399	0.0108	0.0678	0.259	|	3.24046	0.0506	0.00536	0.312	|	4	23	0.173913	1	18	0.0555556	1	31	0.0322581	1	25	0.04	0	22	0	1	32	0.03125	|	2	13	0.153846	0	6	0
chr10	110422466	-	T	chr10:110422466	Nav3	.	intergenic	non_coding_transcript_variant	0	0	-	-	-	-	-2.17601	0.0138	0.0625	0.376	|	1.51243	0.0146	0.00511	0.646	|	5	40	0.125	1	16	0.0625	1	32	0.03125	1	28	0.0357143	2	27	0.0740741	0	29	0	|	2	15	0.133333	0	12	0
chr10	110422480	-	T	chr10:110422480	Nav3	.	intergenic	non_coding_transcript_variant	0	0	-	-	-	-	1.84719	0.0422	0.0117	0.418	|	-0.975333	0.0143	0.0281	0.769	|	1	40	0.025	0	17	0	2	31	0.0645161	1	34	0.0294118	1	27	0.037037	2	29	0.0689655	|	0	16	0	2	9	0.222222
chr10	110422488	-	T	chr10:110422488	Nav3	.	intergenic	non_coding_transcript_variant	0	0	110423034	546	upstream	undefined	3.28442	0.0387	0.00397	0.238	|	1.88129	0.00368	0.001	0.423	|	0	38	0	0	18	0	2	32	0.0625	1	36	0.0277778	1	31	0.0322581	2	31	0.0645161	|	0	16	0	0	9	0
chr10	110422501	-	T	chr10:110422501	Nav3	.	intergenic	non_coding_transcript_variant	0	0	110423022	521	upstream	undefined	-1.66654	0.00459	0.0146	0.6	|	-2.74294	0.00362	0.0243	0.409	|	0	39	0	1	19	0.0526316	2	34	0.0588235	0	37	0	0	34	0	3	31	0.0967742	|	2	14	0.142857	1	10	0.1
chr10	110422504	-	T	chr10:110422504	Nav3	.	intergenic	non_coding_transcript_variant	0	0	110423019	515	upstream	undefined	1.97227	0.0542	0.0138	0.425	|	-2.79361	0.00362	0.0251	0.409	|	1	38	0.0263158	2	20	0.1	0	32	0	1	37	0.027027	2	34	0.0588235	3	30	0.1	|	1	14	0.0714286	2	9	0.222222
chr10	110422505	-	T	chr10:110422505	Nav3	.	intergenic	non_coding_transcript_variant	0	0	110423018	513	upstream	undefined	-2.46625	0.026	0.144	0.405	|	-0.407464	0.0189	0.0251	0.905	|	3	38	0.0789474	6	20	0.3	4	32	0.125	5	38	0.131579	0	34	0	4	30	0.133333	|	1	14	0.0714286	2	9	0.222222
chr10	110422516	-	T	chr10:110422516	Nav3	.	intergenic	non_coding_transcript_variant	0	0	110423007	491	upstream	undefined	-0.129899	0.129	0.141	0.887	|	-2.64495	0.0334	0.209	0.411	|	3	30	0.1	6	17	0.352941	2	25	0.08	4	32	0.125	2	29	0.0689655	6	24	0.25	|	2	11	0.181818	2	8	0.25
chr10	110422994	-	T	chr10:110422994	Nav3	.	intergenic	non_coding_transcript_variant	0	0	110422529	465	downstream	undefined	-1.76652	0.00833	0.0284	0.369	|	-0.245655	0.00405	0.00481	0.939	|	2	50	0.04	1	45	0.0222222	1	39	0.025641	1	48	0.0208333	0	62	0	1	36	0.0277778	|	0	16	0	0	19	0
chr10	110423002	-	T	chr10:110423002	Nav3	.	intergenic	non_coding_transcript_variant	0	0	110422524	478	downstream	undefined	4.98339	0.0316	0.001	0.00921	|	-3.76377	0.001	0.0136	0.184	|	0	52	0	0	42	0	0	46	0	2	54	0.037037	1	60	0.0166667	2	39	0.0512821	|	0	17	0	1	21	0.047619
chr10	110423019	-	T	chr10:110423019	Nav3	.	intergenic	non_coding_transcript_variant	0	0	110422504	515	downstream	undefined	0.249078	0.00415	0.00349	0.932	|	1.47865	0.0458	0.0164	0.545	|	0	59	0	0	40	0	2	47	0.0425532	0	56	0	0	68	0	3	42	0.0714286	|	0	15	0	2	25	0.08
chr10	110423031	-	T	chr10:110423031	Nav3	.	intergenic	non_coding_transcript_variant	0	0	110422491	540	downstream	undefined	1.58591	0.00989	0.00329	0.556	|	-2.86294	0.0126	0.0914	0.262	|	0	60	0	0	39	0	2	56	0.0357143	0	54	0	1	69	0.0144928	3	45	0.0666667	|	1	21	0.047619	2	22	0.0909091
chr10	110423055	-	T	chr10:110423055	Nav3	.	intergenic	non_coding_transcript_variant	0	0	-	-	-	-	1.31447	0.00249	0.001	0.423	|	1.7303	0.0491	0.0148	0.471	|	0	52	0	0	36	0	0	54	0	0	50	0	1	65	0.0153846	0	44	0	|	1	22	0.0454545	0	23	0
chr10	110423057	-	T	chr10:110423057	Nav3	.	intergenic	non_coding_transcript_variant	0	0	110422464	593	downstream	undefined	1.52449	0.00288	0.001	0.423	|	-2.06707	0.0045	0.0188	0.538	|	0	52	0	0	36	0	0	53	0	0	44	0	0	63	0	1	42	0.0238095	|	0	20	0	1	23	0.0434783
chr10	110423070	-	T	chr10:110423070	Nav3	.	intergenic	non_coding_transcript_variant	0	0	110422451	619	downstream	undefined	-1.96299	0.00303	0.0118	0.459	|	1.66667	0.0714	0.0225	0.537	|	0	40	0	1	27	0.037037	2	45	0.0444444	1	36	0.0277778	0	48	0	0	30	0	|	2	16	0.125	0	18	0
chr10	110423071	-	T	chr10:110423071	Nav3	.	intergenic	non_coding_transcript_variant	0	0	110422450	621	downstream	undefined	-0.365052	0.00277	0.00357	0.885	|	1.5898	0.0131	0.00437	0.604	|	0	40	0	0	27	0	2	44	0.0454545	0	36	0	1	47	0.0212766	0	32	0	|	0	16	0	0	18	0
chr10	110423078	-	T	chr10:110423078	Nav3	.	intergenic	non_coding_transcript_variant	0	0	110422443	635	downstream	undefined	-1.32758	0.014	0.0352	0.567	|	1.84931	0.0643	0.0178	0.47	|	1	38	0.0263158	1	28	0.0357143	2	43	0.0465116	3	35	0.0857143	0	47	0	1	31	0.0322581	|	1	16	0.0625	0	19	0
chr10	110423083	-	T	chr10:110423083	Nav3	.	intergenic	non_coding_transcript_variant	0	0	110422440	643	downstream	undefined	-1.77238	0.00322	0.011	0.505	|	4.34558	0.0203	0.001	0.192	|	1	35	0.0285714	0	27	0	2	43	0.0465116	0	36	0	0	46	0	1	30	0.0333333	|	0	16	0	0	17	0
chr10	110423084	-	T	chr10:110423084	Nav3	.	intergenic	non_coding_transcript_variant	0	0	110422437	647	downstream	undefined	0	0.001	0.001	---	|	-2.9829	0.00362	0.0287	0.388	|	0	35	0	0	28	0	0	43	0	0	37	0	0	47	0	0	33	0	|	0	16	0	2	17	0.117647
chr10	110423089	-	T	chr10:110423089	Nav3	.	intergenic	non_coding_transcript_variant	0	0	110422432	657	downstream	undefined	2.09086	0.0124	0.0029	0.44	|	-2.88129	0.00333	0.0246	0.386	|	0	36	0	0	31	0	1	41	0.0243902	3	37	0.0810811	1	43	0.0232558	0	30	0	|	1	15	0.0666667	0	17	0
chr10	110423103	-	T	chr10:110423103	Nav3	.	intergenic	non_coding_transcript_variant	0	0	110422418	685	downstream	undefined	1.57227	0.00901	0.00303	0.523	|	-0.302297	0.00511	0.0063	0.936	|	0	36	0	0	30	0	1	36	0.0277778	1	37	0.027027	1	37	0.027027	0	30	0	|	4	16	0.25	0	19	0
chr10	110423110	-	T	chr10:110423110	Nav3	.	intergenic	non_coding_transcript_variant	0	0	110422412	698	downstream	undefined	1.91813	0.0111	0.00292	0.459	|	1.88698	0.0144	0.00389	0.531	|	0	35	0	0	30	0	1	40	0.025	2	39	0.0512821	1	38	0.0263158	0	31	0	|	1	17	0.0588235	0	19	0
chr10	111476135	+	A	chr10:111476135	Nap1l1	SINE	Intron	intron_variant	1	1	-	-	-	-	2.16878	0.0045	0.001	0.423	|	-3.45874	0.00531	0.0584	0.287	|	0	10	0	0	8	0	0	14	0	1	11	0.0909091	0	18	0	0	6	0	|	1	22	0.0454545	1	12	0.0833333
chr10	111976284	+	A	chr10:111976284	Krr1	.	Intron	non_coding_transcript_exon_variant	0	0	-	-	-	-	-2.85025	0.001	0.00721	0.423	|	0	0.001	0.001	---	|	6	16	0.375	0	12	0	0	9	0	0	13	0	0	10	0	0	8	0	|	0	8	0	0	7	0
chr10	112287535	+	A	chr10:112287535	Kcnc2	LINE	Intron	intron_variant	0	0	-	-	-	-	-4.509	0.00368	0.0839	0.125	|	-0.426985	0.0291	0.0391	0.912	|	1	17	0.0588235	1	23	0.0434783	6	26	0.230769	1	20	0.05	0	8	0	0	8	0	|	2	5	0.4	0	8	0
chr10	112287688	+	A	chr10:112287688	Kcnc2	LINE	Intron	intron_variant	0	0	-	-	-	-	2.39146	0.126	0.0241	0.412	|	2.60459	0.22	0.0362	0.422	|	2	11	0.181818	1	13	0.0769231	0	19	0	1	11	0.0909091	2	18	0.111111	1	5	0.2	|	2	7	0.285714	0	5	0
chr10	112291232	+	A	chr10:112291232	Kcnc2	LINE	Intron	intron_variant	0	0	-	-	-	-	-0.397548	0.00397	0.00523	0.905	|	-0.333333	0.00464	0.00585	0.926	|	0	6	0	1	7	0.142857	0	8	0	0	11	0	1	16	0.0625	0	10	0	|	0	7	0	1	5	0.2
chr10	112291237	+	A	chr10:112291237	Kcnc2	LINE	Intron	intron_variant	0	0	-	-	-	-	0	0.001	0.001	---	|	2.79361	0.00693	0.001	0.423	|	0	6	0	0	7	0	0	8	0	0	11	0	0	16	0	0	11	0	|	0	7	0	0	5	0
chr10	112291248	+	A	chr10:112291248	Kcnc2	LINE	Intron	intron_variant	0	0	-	-	-	-	0	0.001	0.001	---	|	0	0.001	0.001	---	|	0	7	0	0	8	0	0	8	0	0	13	0	0	15	0	0	10	0	|	0	7	0	0	6	0
chr10	112291257	+	A	chr10:112291257	Kcnc2	LINE	Intron	intron_variant	0	0	-	-	-	-	-2.26529	0.001	0.00481	0.423	|	0	0.001	0.001	---	|	0	7	0	0	8	0	1	9	0.111111	0	18	0	0	14	0	0	8	0	|	0	7	0	0	6	0
chr10	117343787	-	T	chr10:117343787	Cpsf6	SINE	intergenic	downstream_gene_variant	0	0	-	-	-	-	-1.81407	0.001	0.00352	0.423	|	-2.00386	0.001	0.00401	0.423	|	1	23	0.0434783	0	17	0	0	22	0	0	34	0	0	17	0	0	19	0	|	0	7	0	0	9	0
chr10	117357209	-	T	chr10:117357209	Cpsf6	SINE	Intron	NMD_transcript_variant	0	0	-	-	-	-	0.108681	0.261	0.242	0.912	|	1.6863	0.141	0.0437	0.61	|	3	9	0.333333	5	9	0.555556	1	13	0.0769231	3	14	0.214286	4	12	0.333333	2	8	0.25	|	0	7	0	4	6	0.666667
chr10	117363921	-	T	chr10:117363921	Cpsf6	SINE	Intron	intron_variant	0	0	117363342	579	downstream	intronic	0.408684	0.0263	0.0198	0.868	|	-0.500833	0.0153	0.0216	0.876	|	0	49	0	2	27	0.0740741	4	38	0.105263	1	50	0.02	2	51	0.0392157	1	43	0.0232558	|	1	11	0.0909091	1	9	0.111111
chr10	117707471	-	T	chr10:117707471	Mdm2	SINE	Intron	non_coding_transcript_variant	0	0	-	-	-	-	2.54767	0.164	0.028	0.402	|	-0.990477	0.109	0.216	0.196	|	3	17	0.176471	0	15	0	3	24	0.125	5	21	0.238095	2	27	0.0740741	4	16	0.25	|	5	13	0.384615	4	17	0.235294
chr10	119488296	+	A	chr10:119488296	Grip1	SINE	Intron	intron_variant	0	0	119489372	1076	downstream	intronic	3.97907	0.0158	0.001	0.184	|	-0.194988	0.00437	0.005	0.954	|	0	16	0	0	10	0	0	20	0	1	15	0.0666667	0	14	0	1	17	0.0588235	|	1	8	0.125	0	5	0
chr10	119489344	+	A	chr10:119489344	Grip1	SINE	Intron	intron_variant	0	0	119488315	1029	upstream	intronic	-0.265675	0.0794	0.0955	0.706	|	-1.98859	0.0322	0.128	0.516	|	1	21	0.047619	2	16	0.125	6	41	0.146341	3	32	0.09375	2	17	0.117647	1	22	0.0454545	|	3	15	0.2	1	8	0.125
chr10	119489365	+	A	chr10:119489365	Grip1	SINE	Intron	intron_variant	0	0	-	-	-	-	-0.826389	0.0588	0.104	0.0489	|	4.49071	0.0225	0.001	0.184	|	3	24	0.125	2	22	0.0909091	4	40	0.1	3	40	0.075	1	16	0.0625	1	23	0.0434783	|	0	15	0	0	8	0
chr10	119489367	+	A	chr10:119489367	Grip1	SINE	Intron	intron_variant	0	0	-	-	-	-	0.654491	0.0912	0.0579	0.251	|	2.03044	0.0225	0.0055	0.576	|	1	24	0.0416667	1	22	0.0454545	4	39	0.102564	3	40	0.075	2	18	0.111111	2	22	0.0909091	|	0	14	0	1	6	0.166667
chr10	119489375	+	A	chr10:119489375	Grip1	SINE	Intron	intron_variant	0	0	119488292	1083	upstream	intronic	-1.67166	0.0484	0.154	0.00981	|	-2.08845	0.001	0.00425	0.423	|	4	24	0.166667	5	27	0.185185	5	42	0.119048	2	40	0.05	1	20	0.05	1	22	0.0454545	|	1	13	0.0769231	0	7	0
chr10	119489437	+	A	chr10:119489437	Grip1	SINE	Intron	intron_variant	0	0	-	-	-	-	-0.377928	0.0578	0.0752	0.737	|	-0.0223714	0.0045	0.00457	0.995	|	2	28	0.0714286	1	37	0.027027	11	50	0.22	6	50	0.12	1	31	0.0322581	1	20	0.05	|	0	14	0	0	11	0
chr10	119514129	+	A	chr10:119514129	Grip1	SINE	Intron	intron_variant	0	0	-	-	-	-	3.96789	0.0156	0.001	0.184	|	0	0.001	0.001	---	|	0	23	0	0	19	0	0	19	0	2	29	0.0689655	0	18	0	1	18	0.0555556	|	0	7	0	0	10	0
chr10	119538137	+	A	chr10:119538137	Grip1	.	Intron	intron_variant	1	1	119538793	656	downstream	intronic	0.0381892	0.82	0.799	0.779	|	-0.0649456	0.697	0.729	0.773	|	37	54	0.685185	57	67	0.850746	42	48	0.875	46	58	0.793103	38	43	0.883721	26	33	0.787879	|	6	8	0.75	7	11	0.636364
chr10	119538142	+	A	chr10:119538142	Grip1	.	Intron	intron_variant	0	0	119538788	646	downstream	intronic	-0.531418	0.17	0.246	0.369	|	-1.27165	0.0659	0.159	0.0427	|	11	52	0.211538	22	64	0.34375	9	44	0.204545	11	58	0.189655	4	42	0.0952381	9	33	0.272727	|	1	9	0.111111	2	13	0.153846
chr10	119538148	+	A	chr10:119538148	Grip1	.	Intron	intron_variant	0	0	119538782	634	downstream	intronic	0.697047	0.171	0.105	0.267	|	-0.130772	0.00523	0.00572	0.972	|	5	54	0.0925926	8	62	0.129032	4	41	0.097561	7	57	0.122807	5	40	0.125	11	34	0.323529	|	0	10	0	0	14	0
chr10	119538151	+	A	chr10:119538151	Grip1	.	Intron	intron_variant	0	0	-	-	-	-	0.436257	0.0407	0.0301	0.523	|	-0.808755	0.00285	0.005	0.787	|	1	57	0.0175439	2	63	0.031746	2	41	0.0487805	3	57	0.0526316	1	46	0.0217391	2	34	0.0588235	|	0	10	0	0	14	0
chr10	119538715	+	A	chr10:119538715	Grip1	LINE	Intron	intron_variant	0	0	-	-	-	-	-0.0462352	0.736	0.76	0.708	|	0.0472752	0.483	0.467	0.92	|	51	66	0.772727	30	44	0.681818	60	72	0.833333	39	59	0.661017	40	51	0.784314	50	65	0.769231	|	6	20	0.3	6	14	0.428571
chr10	119538719	+	A	chr10:119538719	Grip1	LINE	Intron	intron_variant	0	0	-	-	-	-	0.348848	0.2	0.157	0.376	|	-2.38614	0.001	0.00523	0.423	|	14	65	0.215385	5	44	0.113636	11	70	0.157143	9	61	0.147541	12	48	0.25	14	65	0.215385	|	0	21	0	2	14	0.142857
chr10	119572753	+	A	chr10:119572753	Grip1	LTR	Intron	intron_variant	0	0	-	-	-	-	-0.407773	0.0574	0.0761	0.546	|	-1.58757	0.01	0.0301	0.626	|	5	43	0.116279	1	18	0.0555556	3	44	0.0681818	2	38	0.0526316	4	36	0.111111	1	31	0.0322581	|	5	23	0.217391	1	8	0.125
chr10	119572768	+	A	chr10:119572768	Grip1	LTR	Intron	intron_variant	0	0	-	-	-	-	-0.290329	0.0492	0.0601	0.651	|	1.75511	0.00338	0.001	0.423	|	4	45	0.0888889	1	19	0.0526316	2	43	0.0465116	1	41	0.0243902	3	41	0.0731707	2	30	0.0666667	|	0	25	0	0	8	0
chr10	119572787	+	A	chr10:119572787	Grip1	LTR	Intron	intron_variant	0	0	-	-	-	-	-0.0272497	0.0112	0.0114	0.992	|	1.77398	0.00342	0.001	0.423	|	3	46	0.0652174	0	19	0	1	44	0.0227273	0	42	0	2	42	0.047619	1	34	0.0294118	|	0	23	0	0	9	0
chr10	119572809	+	A	chr10:119572809	Grip1	LTR	Intron	intron_variant	0	0	-	-	-	-	2.22887	0.0511	0.0109	0.332	|	-0.881285	0.0062	0.0114	0.796	|	1	43	0.0232558	1	18	0.0555556	0	36	0	2	39	0.0512821	3	34	0.0882353	1	34	0.0294118	|	1	24	0.0416667	0	10	0
chr10	119573004	+	A	chr10:119573004	Grip1	LTR	Intron	intron_variant	0	0	-	-	-	-	0.17721	0.0546	0.0482	0.749	|	-0.0741308	0.00457	0.00481	0.982	|	1	38	0.0263158	1	19	0.0526316	3	37	0.0810811	2	35	0.0571429	2	32	0.0625	1	22	0.0454545	|	0	9	0	0	10	0
chr10	119578675	+	A	chr10:119578675	Grip1	LTR	Intron	intron_variant	0	0	-	-	-	-	2.4271	0.0223	0.00415	0.473	|	-1.71666	0.0287	0.0942	0.555	|	0	18	0	1	14	0.0714286	0	14	0	0	12	0	1	15	0.0666667	1	6	0.166667	|	1	9	0.111111	1	7	0.142857
chr10	119578679	+	A	chr10:119578679	Grip1	LTR	Intron	intron_variant	0	0	-	-	-	-	0.0876781	0.00405	0.00382	0.976	|	0.177894	0.0212	0.0187	0.957	|	1	18	0.0555556	0	14	0	0	14	0	0	10	0	1	15	0.0666667	0	9	0	|	1	8	0.125	0	7	0
chr10	119578689	+	A	chr10:119578689	Grip1	LTR	Intron	intron_variant	0	0	-	-	-	-	0	0.001	0.001	---	|	0	0.001	0.001	---	|	0	21	0	0	14	0	0	17	0	0	9	0	0	14	0	0	10	0	|	0	8	0	0	7	0
chr10	119610309	+	A	chr10:119610309	AC158686.2,Grip1	LTR	Intron	regulatory_region_variant	0	0	-	-	-	-	-0.140501	0.03	0.0331	0.781	|	0.304179	0.017	0.0138	0.919	|	1	50	0.02	2	47	0.0425532	2	47	0.0425532	2	44	0.0454545	1	41	0.0243902	1	41	0.0243902	|	0	10	0	1	16	0.0625
chr10	119781214	+	A	chr10:119781214	Grip1	DNA	Intron	intron_variant	0	0	-	-	-	-	-4.07936	0.00464	0.0785	0.201	|	0.107309	0.0247	0.023	0.976	|	1	9	0.111111	3	23	0.130435	1	30	0.0333333	0	8	0	0	21	0	1	10	0.1	|	0	12	0	1	11	0.0909091
chr10	119781229	+	A	chr10:119781229	Grip1	DNA	Intron	intron_variant	0	0	-	-	-	-	-4.54688	0.00669	0.156	0.239	|	-2.36776	0.00567	0.0292	0.535	|	1	8	0.125	6	27	0.222222	4	29	0.137931	0	10	0	6	20	0.3	0	11	0	|	0	12	0	2	12	0.166667
chr10	119785556	+	A	chr10:119785556	Grip1	DNA	Intron	intron_variant	0	0	-	-	-	-	-1.77518	0.00397	0.0136	0.552	|	4.32579	0.0201	0.001	0.186	|	0	27	0	1	19	0.0526316	1	21	0.047619	0	22	0	1	16	0.0625	0	7	0	|	0	8	0	0	6	0
chr10	123134592	-	T	chr10:123134592	Usp15	.	Intron	non_coding_transcript_variant	0	0	-	-	-	-	-1.32096	0.0127	0.0318	0.694	|	0.948256	0.0465	0.0241	0.726	|	0	24	0	2	11	0.181818	3	17	0.176471	1	18	0.0555556	0	26	0	1	27	0.037037	|	4	19	0.210526	0	12	0
chr10	123165541	-	T	chr10:123165541	Usp15	SINE	Intron	non_coding_transcript_variant	0	0	-	-	-	-	0.359408	0.0206	0.0161	0.911	|	-0.50232	0.00382	0.0054	0.88	|	1	30	0.0333333	2	16	0.125	0	30	0	3	33	0.0909091	0	29	0	3	31	0.0967742	|	0	13	0	3	19	0.157895
chr10	123165585	-	T	chr10:123165585	Usp15	SINE	Intron	non_coding_transcript_variant	0	0	123168040	2455	upstream	intronic	0.832129	0.0206	0.0116	0.784	|	1.04184	0.0235	0.0114	0.738	|	1	37	0.027027	0	22	0	2	35	0.0571429	2	27	0.0740741	0	28	0	4	34	0.117647	|	0	11	0	1	21	0.047619
chr10	123165590	-	T	chr10:123165590	Usp15	SINE	Intron	non_coding_transcript_variant	0	0	123168036	2446	upstream	intronic	0.764453	0.0991	0.0583	0.476	|	3.80784	0.0643	0.00459	0.224	|	1	36	0.0277778	3	24	0.125	2	35	0.0571429	5	27	0.185185	1	28	0.0357143	5	34	0.147059	|	0	11	0	0	19	0
chr10	123295808	+	A	chr10:123295808	Fam19a2	LINE	Intron	non_coding_transcript_variant	0	0	-	-	-	-	-0.333333	0.00357	0.0045	0.912	|	1.88129	0.00368	0.001	0.423	|	0	18	0	2	22	0.0909091	0	30	0	1	22	0.0454545	0	20	0	0	16	0	|	0	17	0	0	11	0
chr10	123295843	+	A	chr10:123295843	Fam19a2	LINE	Intron	non_coding_transcript_variant	0	0	-	-	-	-	-4.01326	0.001	0.0161	0.185	|	-0.0682863	0.0169	0.0177	0.983	|	1	19	0.0526316	2	25	0.08	0	33	0	0	23	0	0	25	0	0	19	0	|	0	19	0	3	16	0.1875
chr10	123295972	+	A	chr10:123295972	Fam19a2	LINE	Intron	non_coding_transcript_variant	0	0	-	-	-	-	-1.49591	0.0403	0.114	0.0973	|	3.60737	0.0637	0.00523	0.267	|	2	18	0.111111	2	27	0.0740741	8	45	0.177778	1	50	0.02	3	40	0.075	2	46	0.0434783	|	0	17	0	0	18	0
chr10	123300837	+	A	chr10:123300837	Fam19a2	LINE	Intron	non_coding_transcript_variant	0	0	-	-	-	-	4.16546	0.0504	0.00281	0.0949	|	0.161809	0.0123	0.011	0.954	|	0	38	0	1	45	0.0222222	0	63	0	2	55	0.0363636	2	59	0.0338983	5	48	0.104167	|	1	12	0.0833333	0	19	0
chr10	123300839	+	A	chr10:123300839	Fam19a2	LINE	Intron	non_coding_transcript_variant	0	0	-	-	-	-	-2.1685	0.00884	0.0398	0.31	|	1.84279	0.00901	0.00251	0.425	|	1	37	0.027027	3	43	0.0697674	2	60	0.0333333	0	52	0	1	59	0.0169492	2	49	0.0408163	|	0	13	0	0	19	0
chr10	123300852	+	A	chr10:123300852	Fam19a2	LINE	Intron	non_coding_transcript_variant	0	0	-	-	-	-	-2.42141	0.00247	0.0133	0.373	|	1.67801	0.0113	0.00352	0.544	|	0	35	0	1	46	0.0217391	6	56	0.107143	0	52	0	1	66	0.0151515	0	51	0	|	0	12	0	0	21	0
chr10	123300912	+	A	chr10:123300912	Fam19a2	LINE	Intron	non_coding_transcript_variant	0	0	-	-	-	-	-1.18277	0.0346	0.0785	0.227	|	-2.57554	0.0116	0.0689	0.302	|	2	50	0.04	6	51	0.117647	7	68	0.102941	5	75	0.0666667	3	70	0.0428571	1	69	0.0144928	|	2	22	0.0909091	2	25	0.08
chr10	123300913	+	A	chr10:123300913	Fam19a2	LINE	Intron	non_coding_transcript_variant	0	0	-	-	-	-	-0.219208	0.0382	0.0445	0.779	|	-2.36008	0.0122	0.0626	0.338	|	3	49	0.0612245	1	51	0.0196078	5	68	0.0735294	5	74	0.0675676	2	70	0.0285714	2	69	0.0289855	|	3	22	0.136364	1	25	0.04
chr10	123300914	+	A	chr10:123300914	Fam19a2	LINE	Intron	non_coding_transcript_variant	0	0	-	-	-	-	-1.44506	0.0035	0.00953	0.594	|	2.10556	0.0122	0.00283	0.434	|	0	49	0	3	51	0.0588235	1	68	0.0147059	0	74	0	3	70	0.0428571	0	68	0	|	0	22	0	0	25	0
chr10	123300928	+	A	chr10:123300928	Fam19a2	LINE	Intron	non_coding_transcript_variant	0	0	-	-	-	-	1.15957	0.0078	0.00349	0.649	|	1.84651	0.0036	0.001	0.423	|	0	44	0	2	47	0.0425532	0	59	0	1	68	0.0147059	2	62	0.0322581	0	63	0	|	0	22	0	0	21	0
chr10	123300974	+	A	chr10:123300974	Fam19a2	LINE	Intron	non_coding_transcript_variant	0	0	-	-	-	-	1.43755	0.0504	0.0186	0.57	|	1.75758	0.0326	0.00963	0.411	|	0	39	0	3	31	0.0967742	4	60	0.0666667	4	60	0.0666667	1	39	0.025641	3	40	0.075	|	1	20	0.05	0	13	0
chr10	123300975	+	A	chr10:123300975	Fam19a2	LINE	Intron	non_coding_transcript_variant	0	0	-	-	-	-	-1.1118	0.05	0.108	0.0703	|	0.530788	0.108	0.0744	0.694	|	3	39	0.0769231	5	31	0.16129	6	59	0.101695	3	60	0.05	2	40	0.05	2	40	0.05	|	2	20	0.1	3	13	0.230769
chr10	123301026	+	A	chr10:123301026	Fam19a2	LINE	Intron	non_coding_transcript_variant	0	0	-	-	-	-	0.918527	0.0259	0.0137	0.693	|	1.07385	0.0568	0.027	0.698	|	0	38	0	3	26	0.115385	1	45	0.0222222	1	50	0.02	1	35	0.0285714	1	33	0.030303	|	3	17	0.176471	1	9	0.111111
chr10	123352795	+	A	chr10:123352795	Fam19a2	SINE	Intron	non_coding_transcript_variant	0	0	123351197	1598	upstream	intronic	-3.17504	0.00325	0.0294	0.203	|	-2.31979	0.00329	0.0164	0.432	|	1	32	0.03125	1	30	0.0333333	1	41	0.0243902	0	44	0	0	53	0	1	29	0.0344828	|	1	15	0.0666667	0	14	0
chr10	123356073	+	A	chr10:123356073	Fam19a2	LINE	Intron	non_coding_transcript_variant	0	0	123358199	2126	downstream	intronic	2.82925	0.0258	0.00362	0.401	|	0	0.001	0.001	---	|	0	7	0	0	11	0	1	21	0.047619	2	13	0.153846	0	10	0	2	18	0.111111	|	0	12	0	0	6	0
chr10	123364085	+	A	chr10:123364085	Fam19a2	LINE	Intron	non_coding_transcript_variant	0	0	-	-	-	-	0.273143	0.297	0.246	0.605	|	3.01963	0.252	0.0311	0.347	|	2	12	0.166667	4	9	0.444444	3	15	0.2	3	9	0.333333	2	6	0.333333	4	17	0.235294	|	1	5	0.2	0	5	0
chr10	123414484	+	A	chr10:123414484	Fam19a2	LTR	Intron	non_coding_transcript_variant	0	0	-	-	-	-	-0.326878	0.0128	0.016	0.911	|	-1.78112	0.00375	0.0129	0.539	|	0	28	0	2	39	0.0512821	2	25	0.08	1	37	0.027027	2	26	0.0769231	0	25	0	|	1	18	0.0555556	0	15	0
chr10	123414493	+	A	chr10:123414493	Fam19a2	LTR	Intron	non_coding_transcript_variant	0	0	-	-	-	-	1.74157	0.0102	0.00306	0.496	|	-2.01963	0.001	0.00405	0.423	|	0	26	0	1	35	0.0285714	0	24	0	1	36	0.0277778	1	26	0.0384615	0	24	0	|	0	18	0	1	15	0.0666667
chr10	123414642	+	A	chr10:123414642	Fam19a2	LTR	Intron	non_coding_transcript_variant	0	0	-	-	-	-	3.36307	0.0103	0.001	0.184	|	-2.0959	0.00431	0.0184	0.523	|	0	16	0	0	20	0	0	38	0	1	27	0.037037	1	34	0.0294118	0	20	0	|	0	15	0	1	8	0.125
chr10	123414656	+	A	chr10:123414656	Fam19a2	LTR	Intron	non_coding_transcript_variant	0	0	-	-	-	-	-3.06327	0.0122	0.102	0.228	|	-2.39146	0.00425	0.0223	0.487	|	2	18	0.111111	3	17	0.176471	2	37	0.0540541	1	29	0.0344828	0	30	0	1	19	0.0526316	|	0	14	0	2	9	0.222222
chr10	123437286	+	A	chr10:123437286	AC152944.1,Fam19a2,Gm22958	LINE	Intron	non_coding_transcript_variant	0	0	-	-	-	-	-2.61677	0.001	0.00613	0.423	|	4.98476	0.0317	0.001	0.184	|	3	13	0.230769	0	10	0	0	9	0	0	7	0	0	8	0	0	7	0	|	0	10	0	0	6	0
chr10	123545591	+	A	chr10:123545591	Fam19a2	LTR	Intron	non_coding_transcript_variant	0	0	123546289	698	downstream	intronic	0.550692	0.00659	0.0045	0.882	|	-0.0709979	0.027	0.0283	0.985	|	0	8	0	1	11	0.0909091	0	8	0	0	7	0	2	7	0.285714	0	14	0	|	0	6	0	2	8	0.25
chr10	123545595	+	A	chr10:123545595	Fam19a2	LTR	Intron	non_coding_transcript_variant	0	0	123546279	684	downstream	intronic	0	0.001	0.001	---	|	0.0965022	0.00481	0.0045	0.977	|	0	9	0	0	12	0	0	9	0	0	7	0	0	7	0	0	14	0	|	0	6	0	0	8	0
chr10	123545695	+	A	chr10:123545695	Fam19a2	LTR	Intron	non_coding_transcript_variant	0	0	123546183	488	downstream	intronic	2.01963	0.00405	0.001	0.423	|	1.56013	0.0172	0.00585	0.66	|	0	6	0	0	11	0	0	10	0	0	12	0	1	15	0.0666667	0	9	0	|	0	5	0	1	5	0.2
chr10	123546041	+	A	chr10:123546041	Fam19a2	LTR	Intron	non_coding_transcript_variant	0	0	123545840	201	upstream	intronic	2.04941	0.0655	0.0158	0.412	|	-0.194988	0.00405	0.00464	0.951	|	1	14	0.0714286	1	18	0.0555556	0	34	0	1	17	0.0588235	1	19	0.0526316	1	11	0.0909091	|	0	5	0	0	5	0
chr10	123610847	+	A	chr10:123610847	Fam19a2	LTR	Intron	non_coding_transcript_variant	0	0	-	-	-	-	-0.064215	0.00397	0.00415	0.983	|	-0.164347	0.0054	0.00606	0.965	|	0	12	0	1	14	0.0714286	0	30	0	0	11	0	1	16	0.0625	0	12	0	|	0	5	0	2	9	0.222222
chr10	123610855	+	A	chr10:123610855	Fam19a2	LTR	Intron	non_coding_transcript_variant	0	0	-	-	-	-	2.01963	0.00405	0.001	0.423	|	-0.333333	0.00397	0.005	0.919	|	0	12	0	0	13	0	0	27	0	0	11	0	1	15	0.0666667	0	11	0	|	0	5	0	1	8	0.125
chr10	123612088	+	A	chr10:123612088	Fam19a2	LTR	Intron	non_coding_transcript_variant	0	0	123612587	499	downstream	intronic	-1.95944	0.00338	0.0131	0.487	|	0	0.001	0.001	---	|	0	15	0	1	26	0.0384615	1	17	0.0588235	0	28	0	1	26	0.0384615	0	13	0	|	0	5	0	0	16	0
chr10	127047352	+	A	chr10:127047352	Cyp27b1,Mettl1	SINE	intergenic	regulatory_region_variant	0	0	-	-	-	-	-3.17733	0.0275	0.249	0.322	|	0.368972	0.0425	0.0329	0.925	|	4	13	0.307692	5	21	0.238095	4	19	0.210526	4	16	0.25	1	12	0.0833333	0	10	0	|	3	20	0.15	0	6	0
chr10	127065844	+	A	chr10:127065844	AC134329.1,Cdk4,Tspan31	SINE	Intron	non_coding_transcript_exon_variant	0	0	-	-	-	-	-2.03059	0.003	0.0123	0.449	|	-2.10094	0.0152	0.0653	0.405	|	2	35	0.0571429	0	41	0	1	31	0.0322581	0	33	0	0	29	0	1	37	0.027027	|	1	27	0.037037	2	19	0.105263
chr10	127466485	+	A	chr10:127466485	R3hdm2	SINE	Intron	non_coding_transcript_variant	1	1	-	-	-	-	-0.950102	0.0362	0.07	0.759	|	-4.14174	0.00357	0.063	0.322	|	1	16	0.0625	4	28	0.142857	1	26	0.0384615	0	36	0	2	21	0.0952381	9	18	0.5	|	2	8	0.25	0	7	0
chr10	127466556	+	A	chr10:127466556	R3hdm2	SINE	Intron	non_coding_transcript_variant	1	1	127467380	824	downstream	intronic	0.471679	0.0055	0.00397	0.889	|	-1	0.00368	0.00737	0.788	|	0	27	0	2	32	0.0625	0	32	0	0	22	0	0	17	0	4	24	0.166667	|	0	15	0	0	9	0
chr10	127470597	+	A	chr10:127470597	R3hdm2	SINE	Intron	non_coding_transcript_variant	0	0	127472484	1887	downstream	intronic	-2.32318	0.0205	0.103	0.405	|	2.63563	0.0363	0.00585	0.512	|	5	32	0.15625	4	18	0.222222	1	32	0.03125	0	27	0	2	21	0.0952381	2	22	0.0909091	|	2	10	0.2	0	6	0
chr10	128098936	+	A	chr10:128098936	Baz2a	SINE	Intron	non_coding_transcript_variant	1	1	-	-	-	-	-0.0357597	0.425	0.435	0.925	|	1.88612	0.238	0.0644	0.595	|	3	7	0.428571	9	17	0.529412	4	11	0.363636	5	17	0.294118	5	12	0.416667	5	8	0.625	|	0	16	0	4	9	0.444444
chr10	128106239	+	A	chr10:128106239	Baz2a	SINE	Intron	non_coding_transcript_variant	0	0	128105446	793	upstream	intronic	0	0.001	0.001	---	|	-2.50212	0.001	0.00567	0.423	|	0	10	0	0	5	0	0	6	0	0	5	0	0	7	0	0	9	0	|	0	7	0	0	6	0
chr10	128354650	+	A	chr10:128354650	Cs	SINE	Intron	intron_variant	1	1	-	-	-	-	4.60768	0.0948	0.00389	0.133	|	2.34079	0.0271	0.00536	0.53	|	0	22	0	0	9	0	1	17	0.0588235	1	23	0.0434783	3	17	0.176471	1	9	0.111111	|	0	20	0	0	9	0
chr10	128354659	+	A	chr10:128354659	Cs	SINE	Intron	intron_variant	1	1	128356318	1659	downstream	intronic	2.01789	0.0845	0.0209	0.474	|	-0.0331786	0.00405	0.00415	0.991	|	1	22	0.0454545	0	9	0	3	15	0.2	1	23	0.0434783	1	16	0.0625	2	9	0.222222	|	0	19	0	0	9	0
chr10	128690301	-	T	chr10:128690301	Rab5b	SINE	Intron	non_coding_transcript_variant	0	0	128690773	472	upstream	intronic	-0.500833	0.00389	0.0055	0.882	|	2.62208	0.0255	0.00415	0.448	|	0	6	0	0	5	0	2	12	0.166667	1	17	0.0588235	0	13	0	0	11	0	|	1	14	0.0714286	0	8	0
chr11	3656712	+	A	chr11:3656712	Gm26393,Morc2a	snRNA	Exon	regulatory_region_variant	0	0	-	-	-	-	0	0.001	0.001	---	|	-0.194988	0.00347	0.00397	0.945	|	0	14	0	0	17	0	0	22	0	0	26	0	0	23	0	0	12	0	|	0	11	0	0	18	0
chr11	4142052	+	A	chr11:4142052	Ccdc157,Mir3060,Rnf215	SINE	UTR	3_prime_UTR_variant	0	0	-	-	-	-	-1.50171	0.00333	0.00944	0.562	|	4.31619	0.0199	0.001	0.184	|	0	24	0	1	29	0.0344828	1	41	0.0243902	1	27	0.037037	0	25	0	0	14	0	|	0	23	0	0	19	0
chr11	4142057	+	A	chr11:4142057	Ccdc157,Mir3060,Rnf215	SINE	UTR	3_prime_UTR_variant	0	0	-	-	-	-	-1.53608	0.001	0.0029	0.423	|	0.861654	0.0228	0.0126	0.783	|	0	24	0	0	32	0	1	41	0.0243902	0	25	0	0	22	0	0	14	0	|	0	21	0	1	18	0.0555556
chr11	4478525	-	T	chr11:4478525	Mtmr3	SINE	intergenic	downstream_gene_variant	0	0	-	-	-	-	-4.33099	0.001	0.0201	0.186	|	-1.9501	0.00481	0.0186	0.563	|	1	16	0.0625	0	16	0	3	23	0.130435	0	8	0	0	15	0	0	15	0	|	1	13	0.0769231	1	12	0.0833333
chr11	4478667	-	T	chr11:4478667	Mtmr3	SINE	intergenic	downstream_gene_variant	0	0	-	-	-	-	-0.0143562	0.0214	0.0216	0.997	|	4.43407	0.0216	0.001	0.184	|	0	12	0	2	11	0.181818	1	18	0.0555556	0	8	0	2	17	0.117647	1	12	0.0833333	|	0	13	0	0	6	0
chr11	4478695	-	T	chr11:4478695	Mtmr3	SINE	intergenic	downstream_gene_variant	0	0	-	-	-	-	3.54724	0.207	0.0177	0.233	|	4.71674	0.0263	0.001	0.185	|	0	11	0	1	9	0.111111	1	20	0.05	1	6	0.166667	3	13	0.230769	3	13	0.230769	|	0	11	0	0	5	0
chr11	4767141	-	T	chr11:4767141	Nf2	.	UTR	3_prime_UTR_variant	0	0	-	-	-	-	0.0108202	0.0622	0.0617	0.981	|	-0.909339	0.0437	0.0822	0.137	|	20	196	0.102041	9	169	0.0532544	11	254	0.0433071	9	184	0.048913	15	227	0.0660793	14	188	0.0744681	|	10	183	0.0546448	20	146	0.136986
chr11	4875617	+	A	chr11:4875617	Nipsnap1	SINE	Intron	non_coding_transcript_variant	0	0	4876239	622	downstream	intronic	-2.17613	0.0055	0.0249	0.557	|	0.415976	0.005	0.00375	0.897	|	1	13	0.0769231	1	5	0.2	0	13	0	0	15	0	0	6	0	2	12	0.166667	|	0	6	0	0	9	0
chr11	4875630	+	A	chr11:4875630	Nipsnap1	SINE	Intron	non_coding_transcript_variant	0	0	4877466	1836	downstream	intronic	2.16543	0.0191	0.00425	0.508	|	-2.59862	0.001	0.00606	0.423	|	0	10	0	0	5	0	1	13	0.0769231	1	12	0.0833333	0	6	0	1	12	0.0833333	|	0	6	0	2	9	0.222222
chr11	5075769	-	T	chr11:5075769	Ewsr1	SINE	Intron	non_coding_transcript_variant	0	0	-	-	-	-	-0.415615	0.233	0.31	0.63	|	-3.7379	0.0386	0.515	0.291	|	2	13	0.153846	5	10	0.5	7	18	0.388889	3	14	0.214286	4	8	0.5	2	17	0.117647	|	5	7	0.714286	3	5	0.6
chr11	5075827	-	T	chr11:5075827	Ewsr1	SINE	Intron	non_coding_transcript_variant	0	0	5075600	227	downstream	intronic	-2.00297	0.00577	0.0231	0.587	|	0.674123	0.0289	0.0181	0.844	|	2	19	0.105263	2	17	0.117647	0	29	0	0	14	0	0	8	0	5	26	0.192308	|	1	13	0.0769231	0	8	0
chr11	5075828	-	T	chr11:5075828	Ewsr1	SINE	Intron	non_coding_transcript_variant	0	0	5075599	229	downstream	intronic	0.623139	0.00577	0.00375	0.854	|	2.23425	0.0929	0.0197	0.41	|	1	19	0.0526316	0	17	0	0	29	0	0	14	0	0	9	0	5	26	0.192308	|	1	15	0.0666667	0	8	0
chr11	5075867	-	T	chr11:5075867	Ewsr1	SINE	Intron	non_coding_transcript_variant	0	0	5074939	928	downstream	intronic	-0.176838	0.00338	0.00382	0.949	|	-0.6462	0.0176	0.0275	0.853	|	1	18	0.0555556	0	14	0	0	29	0	0	16	0	0	11	0	1	26	0.0384615	|	4	12	0.333333	0	12	0
chr11	5075873	-	T	chr11:5075873	Ewsr1	SINE	Intron	non_coding_transcript_variant	1	1	5074933	940	downstream	intronic	5.00549	0.106	0.00329	0.0902	|	-2.67204	0.0267	0.17	0.381	|	0	17	0	0	13	0	1	28	0.0357143	1	16	0.0625	1	11	0.0909091	5	24	0.208333	|	5	13	0.384615	1	12	0.0833333
chr11	6097684	-	T	chr11:6097684	-	SINE	intergenic	intergenic_variant	0	0	6095456	2228	downstream	undefined	0	0.001	0.001	---	|	0	0.001	0.001	---	|	0	20	0	0	25	0	0	17	0	0	13	0	0	13	0	0	15	0	|	0	14	0	0	5	0
chr11	6260797	-	T	chr11:6260797	Ddx56	SINE	Intron	intron_variant	0	0	6259882	915	downstream	intronic	0	0.001	0.001	---	|	2.21462	0.0193	0.00415	0.497	|	0	9	0	0	14	0	0	21	0	0	9	0	0	22	0	0	10	0	|	1	14	0.0714286	0	6	0
chr11	6355673	+	A	chr11:6355673	Ogdh	.	UTR	stop_lost	0	0	-	-	-	-	0.685191	0.0203	0.0126	0.416	|	2.89327	0.0255	0.00343	0.241	|	1	90	0.0111111	1	93	0.0107527	2	119	0.0168067	1	108	0.00925926	2	102	0.0196078	4	87	0.045977	|	0	72	0	0	54	0
chr11	6393227	+	A	chr11:6393227	Zmiz2	SINE	Intron	intron_variant	1	1	6391149	2078	upstream	intronic	0.1318	0.201	0.183	0.819	|	0.282006	0.183	0.151	0.731	|	6	53	0.113208	7	30	0.233333	14	60	0.233333	14	41	0.341463	10	54	0.185185	5	39	0.128205	|	5	35	0.142857	5	24	0.208333
chr11	7169112	+	A	chr11:7169112	Adcy1	.	Intron	non_coding_transcript_variant	1	1	-	-	-	-	4.76257	0.0271	0.001	0.185	|	-0.171524	0.00464	0.00523	0.961	|	0	11	0	0	6	0	0	8	0	1	10	0.1	0	10	0	1	5	0.2	|	0	7	0	1	7	0.142857
chr11	7170104	+	A	chr11:7170104	Adcy1	.	UTR	3_prime_UTR_variant	0	0	-	-	-	-	0.0938008	0.0432	0.0404	0.702	|	-0.182436	0.0446	0.0506	0.678	|	4	123	0.0325203	5	119	0.0420168	9	186	0.0483871	6	118	0.0508475	6	134	0.0447761	3	85	0.0352941	|	10	134	0.0746269	4	71	0.056338
chr11	11932286	-	T	chr11:11932286	Grb10	.	UTR	3_prime_UTR_variant	0	0	-	-	-	-	-0.830017	0.00926	0.0165	0.662	|	0.482929	0.034	0.0243	0.45	|	1	89	0.011236	2	106	0.0188679	2	95	0.0210526	0	92	0	4	106	0.0377358	2	95	0.0210526	|	5	128	0.0390625	1	81	0.0123457
chr11	11932287	-	T	chr11:11932287	Grb10	.	UTR	3_prime_UTR_variant	0	0	11932331	44	upstream	UTR	1.34592	0.0186	0.00731	0.451	|	0.604518	0.0202	0.0133	0.345	|	0	89	0	2	108	0.0185185	2	95	0.0210526	1	92	0.0108696	3	105	0.0285714	2	97	0.0206186	|	1	127	0.00787402	2	81	0.0246914
chr11	21114806	+	A	chr11:21114806	Peli1	.	Intron	non_coding_transcript_variant	0	0	21115268	462	downstream	intronic	2.01963	0.00405	0.001	0.423	|	0.0994799	0.011	0.0103	0.97	|	0	5	0	0	11	0	0	8	0	0	5	0	1	15	0.0666667	0	13	0	|	1	33	0.030303	1	28	0.0357143
chr11	21136470	+	A	chr11:21136470	Peli1	SINE	Intron	non_coding_transcript_variant	0	0	-	-	-	-	-1.24634	0.062	0.147	0.289	|	0.817906	0.00507	0.00288	0.787	|	1	22	0.0454545	4	19	0.210526	6	18	0.333333	1	28	0.0357143	2	23	0.0869565	2	26	0.0769231	|	0	6	0	0	6	0
chr11	21244104	+	A	chr11:21244104	Vps54	SINE	Intron	intron_variant	0	0	21242617	1487	upstream	intronic	1.60482	0.0953	0.0313	0.586	|	2.46027	0.0055	0.001	0.423	|	0	14	0	3	15	0.2	2	13	0.153846	1	11	0.0909091	1	15	0.0666667	2	14	0.142857	|	0	9	0	0	7	0
chr11	22162855	-	T	chr11:22162855	Ehbp1	SINE	Intron	non_coding_transcript_variant	0	0	-	-	-	-	-1.23929	0.0042	0.00991	0.666	|	-2.79438	0.00352	0.0244	0.398	|	0	30	0	1	27	0.037037	1	38	0.0263158	0	41	0	0	21	0	2	27	0.0740741	|	3	20	0.15	0	11	0
chr11	23263253	+	A	chr11:23263253	Xpo1	SINE	Intron	non_coding_transcript_variant	0	0	23265478	2225	downstream	intronic	3.41658	0.0647	0.00606	0.318	|	4.10808	0.0716	0.00415	0.183	|	0	8	0	2	9	0.222222	0	14	0	1	8	0.125	1	22	0.0454545	1	21	0.047619	|	0	11	0	1	14	0.0714286
chr11	23270387	+	A	chr11:23270387	Xpo1	.	Intron	non_coding_transcript_variant	1	1	-	-	-	-	1.37271	0.00934	0.00361	0.606	|	-1.37634	0.0123	0.0319	0.536	|	0	39	0	0	51	0	3	64	0.046875	0	48	0	2	63	0.031746	2	78	0.025641	|	1	40	0.025	1	32	0.03125
chr11	23283587	+	A	chr11:23283587	Xpo1	SINE	Intron	intron_variant	0	0	23284129	542	downstream	intronic	2.14049	0.083	0.0188	0.426	|	3.32822	0.037	0.00368	0.214	|	0	29	0	2	15	0.133333	1	20	0.05	1	20	0.05	2	25	0.08	3	21	0.142857	|	0	18	0	0	16	0
chr11	23283617	+	A	chr11:23283617	Xpo1	SINE	Intron	intron_variant	0	0	23281631	1986	upstream	intronic	0.914029	0.258	0.137	0.128	|	-5.19313	0.00453	0.166	0.132	|	3	27	0.111111	2	15	0.133333	4	23	0.173913	5	17	0.294118	4	26	0.153846	8	21	0.380952	|	1	13	0.0769231	3	16	0.1875
chr11	23339485	+	A	chr11:23339485	Usp34	SINE	Intron	intron_variant	0	0	-	-	-	-	-0.0703833	0.197	0.207	0.953	|	-0.264036	0.266	0.319	0.634	|	1	18	0.0555556	3	11	0.272727	17	29	0.586207	5	23	0.217391	6	20	0.3	2	17	0.117647	|	5	14	0.357143	6	12	0.5
chr11	23347109	+	A	chr11:23347109	Usp34	SINE	Intron	intron_variant	0	0	-	-	-	-	-1.59862	0.001	0.00303	0.423	|	0	0.001	0.001	---	|	0	30	0	0	27	0	1	36	0.0277778	0	24	0	0	16	0	0	24	0	|	0	5	0	0	8	0
chr11	23347132	+	A	chr11:23347132	Usp34	SINE	Intron	intron_variant	0	0	23346796	336	upstream	intronic	2.40318	0.0647	0.0122	0.324	|	-4.67489	0.00523	0.134	0.18	|	2	28	0.0714286	0	20	0	1	39	0.025641	1	28	0.0357143	2	17	0.117647	2	31	0.0645161	|	2	5	0.4	1	8	0.125
chr11	23375423	+	A	chr11:23375423	Usp34	SINE	Intron	intron_variant	0	0	-	-	-	-	-2.36452	0.0212	0.109	0.411	|	-4.14657	0.001	0.0177	0.187	|	1	31	0.0322581	5	20	0.25	5	31	0.16129	0	15	0	2	36	0.0555556	6	35	0.171429	|	2	18	0.111111	0	15	0
chr11	23410572	+	A	chr11:23410572	Usp34	SINE	Intron	intron_variant	0	0	-	-	-	-	2.0443	0.0152	0.00368	0.494	|	0	0.001	0.001	---	|	0	23	0	0	15	0	2	40	0.05	1	19	0.0526316	1	15	0.0666667	0	18	0	|	0	9	0	0	7	0
chr11	23410573	+	A	chr11:23410573	Usp34	SINE	Intron	intron_variant	0	0	-	-	-	-	0.532521	0.241	0.167	0.394	|	2.10094	0.0206	0.00481	0.545	|	4	23	0.173913	4	15	0.266667	4	40	0.1	4	19	0.210526	6	15	0.4	3	18	0.166667	|	1	9	0.111111	0	7	0
chr11	23410869	+	A	chr11:23410869	Usp34	SINE	Intron	intron_variant	0	0	23410599	270	upstream	intronic	-1.95944	0.001	0.00389	0.423	|	-0.0876781	0.0055	0.00585	0.981	|	0	13	0	1	17	0.0588235	0	16	0	0	13	0	0	8	0	0	10	0	|	0	11	0	1	5	0.2
chr11	23455999	+	A	chr11:23455999	Usp34	.	Intron	3_prime_UTR_variant	0	0	-	-	-	-	-0.0390716	0.0194	0.0199	0.971	|	1.72918	0.0256	0.00772	0.369	|	2	90	0.0222222	3	87	0.0344828	1	97	0.0103093	4	62	0.0645161	1	103	0.00970874	1	86	0.0116279	|	2	70	0.0285714	1	62	0.016129
chr11	23463092	+	A	chr11:23463092	Usp34	SINE	Intron	intron_variant	1	1	23461449	1643	upstream	intronic	2.42178	0.00536	0.001	0.423	|	1.95944	0.00389	0.001	0.423	|	0	27	0	0	21	0	0	25	0	2	13	0.153846	0	18	0	0	26	0	|	0	14	0	0	15	0
chr11	23463099	+	A	chr11:23463099	Usp34	SINE	Intron	intron_variant	1	1	23461441	1658	upstream	intronic	1.97247	0.0176	0.0045	0.547	|	-4.07704	0.001	0.0169	0.184	|	0	28	0	2	22	0.0909091	0	25	0	1	13	0.0769231	0	20	0	2	28	0.0714286	|	1	13	0.0769231	1	16	0.0625
chr11	23565356	-	T	chr11:23565356	0610010F05Rik	SINE	intergenic	NMD_transcript_variant	0	0	23567387	2031	upstream	undefined	-2.66092	0.0227	0.144	0.37	|	3.2093	0.0353	0.00382	0.38	|	1	6	0.166667	1	13	0.0769231	3	13	0.230769	0	11	0	1	18	0.0555556	4	19	0.210526	|	0	5	0	0	7	0
chr11	25859877	-	T	chr11:25859877	5730522E02Rik	.	Intron	non_coding_transcript_variant	0	0	25860944	1067	upstream	intronic	0.114487	0.0165	0.0153	0.97	|	4.42924	0.0215	0.001	0.184	|	2	45	0.0444444	2	25	0.08	0	29	0	2	35	0.0571429	3	38	0.0789474	0	28	0	|	0	6	0	0	9	0
chr11	25859878	-	T	chr11:25859878	5730522E02Rik	.	Intron	non_coding_transcript_variant	0	0	25860944	1066	upstream	intronic	0.187344	0.146	0.129	0.382	|	-0.157977	0.0342	0.0382	0.968	|	6	45	0.133333	4	26	0.153846	3	29	0.103448	5	36	0.138889	6	38	0.157895	4	28	0.142857	|	1	6	0.166667	3	9	0.333333
chr11	25859881	-	T	chr11:25859881	5730522E02Rik	.	Intron	non_coding_transcript_variant	0	0	-	-	-	-	0.174483	0.117	0.104	0.889	|	5.12771	0.192	0.0055	0.165	|	1	44	0.0227273	6	27	0.222222	6	27	0.222222	4	36	0.111111	4	38	0.105263	4	29	0.137931	|	1	6	0.166667	0	10	0
chr11	25859899	-	T	chr11:25859899	5730522E02Rik	.	Intron	non_coding_transcript_variant	0	0	25858873	1026	downstream	Intron	2.97579	0.0283	0.0036	0.248	|	2.16878	0.0045	0.001	0.423	|	2	43	0.0465116	0	25	0	0	26	0	1	32	0.03125	1	46	0.0217391	1	30	0.0333333	|	0	6	0	0	9	0
chr11	25859907	-	T	chr11:25859907	5730522E02Rik	.	Intron	non_coding_transcript_variant	0	0	25860913	1006	upstream	intronic	-0.61119	0.158	0.242	0.136	|	-4.96552	0.00523	0.163	0.171	|	8	43	0.186047	9	26	0.346154	7	32	0.21875	6	33	0.181818	6	46	0.130435	5	30	0.166667	|	1	6	0.166667	2	9	0.222222
chr11	25859913	-	T	chr11:25859913	5730522E02Rik	.	Intron	non_coding_transcript_variant	0	0	25860906	993	upstream	intronic	-0.692389	0.104	0.168	0.325	|	2.02681	0.102	0.0251	0.476	|	8	43	0.186047	5	26	0.192308	4	30	0.133333	7	32	0.21875	3	43	0.0697674	2	27	0.0740741	|	1	7	0.142857	1	9	0.111111
chr11	25859920	-	T	chr11:25859920	5730522E02Rik	.	Intron	non_coding_transcript_variant	0	0	25860899	979	upstream	intronic	3.24226	0.0333	0.00352	0.215	|	1.6318	0.0181	0.00585	0.647	|	0	37	0	1	23	0.0434783	0	31	0	1	29	0.0344828	1	39	0.025641	1	24	0.0416667	|	1	5	0.2	0	7	0
chr11	25860913	-	T	chr11:25860913	5730522E02Rik	.	Intron	non_coding_transcript_variant	0	0	25859907	1006	downstream	intronic	-0.103321	0.172	0.185	0.864	|	2.16147	0.211	0.0471	0.52	|	7	29	0.241379	4	27	0.148148	8	45	0.177778	4	30	0.133333	9	26	0.346154	4	36	0.111111	|	0	11	0	2	5	0.4
chr11	25860916	-	T	chr11:25860916	5730522E02Rik	.	Intron	non_coding_transcript_variant	0	0	25859905	1011	downstream	intronic	-1.99091	0.0174	0.0693	0.439	|	3.65143	0.0657	0.00523	0.265	|	1	29	0.0344828	2	27	0.0740741	6	46	0.130435	2	29	0.0689655	2	26	0.0769231	0	37	0	|	0	11	0	0	8	0
chr11	25860931	-	T	chr11:25860931	5730522E02Rik	.	Intron	non_coding_transcript_variant	0	0	25859931	1000	downstream	intronic	-0.271077	0.163	0.197	0.299	|	-0.700644	0.205	0.334	0.235	|	5	29	0.172414	6	25	0.24	9	49	0.183673	4	28	0.142857	6	29	0.206897	6	41	0.146341	|	6	13	0.461538	3	9	0.333333
chr11	25860942	-	T	chr11:25860942	5730522E02Rik	.	Intron	non_coding_transcript_variant	0	0	25859917	1025	downstream	intronic	3.99469	0.0669	0.0042	0.191	|	-0.0444222	0.022	0.0227	0.99	|	0	32	0	2	27	0.0740741	0	42	0	2	31	0.0645161	3	30	0.1	2	43	0.0465116	|	0	13	0	1	11	0.0909091
chr11	25860945	-	T	chr11:25860945	5730522E02Rik	.	Intron	non_coding_transcript_variant	0	0	25859917	1028	downstream	intronic	0.668172	0.0964	0.0607	0.342	|	-0.121666	0.022	0.024	0.972	|	1	32	0.03125	3	28	0.107143	3	45	0.0666667	3	33	0.0909091	2	29	0.0689655	6	42	0.142857	|	0	14	0	1	11	0.0909091
chr11	25860954	-	T	chr11:25860954	5730522E02Rik	.	Intron	non_coding_transcript_variant	0	0	25859868	1086	downstream	intronic	0.231922	0.0813	0.0692	0.793	|	1.99846	0.0927	0.0232	0.475	|	2	38	0.0526316	3	28	0.107143	3	51	0.0588235	6	36	0.166667	1	33	0.030303	5	47	0.106383	|	0	16	0	1	12	0.0833333
chr11	25860955	-	T	chr11:25860955	5730522E02Rik	.	Intron	non_coding_transcript_variant	0	0	25859868	1087	downstream	intronic	2.06019	0.0686	0.0164	0.428	|	4.44041	0.108	0.00496	0.19	|	0	38	0	3	27	0.111111	2	50	0.04	6	36	0.166667	1	33	0.030303	3	47	0.0638298	|	0	16	0	0	12	0
chr11	25860959	-	T	chr11:25860959	5730522E02Rik	.	Intron	non_coding_transcript_variant	0	0	25859860	1099	downstream	intronic	-0.415986	0.0594	0.0793	0.499	|	0.0246669	0.00472	0.00464	0.994	|	3	37	0.0810811	2	26	0.0769231	4	50	0.08	3	35	0.0857143	1	34	0.0294118	4	48	0.0833333	|	0	15	0	0	12	0
chr11	26094156	-	T	chr11:26094156	5730522E02Rik	SINE	Intron	non_coding_transcript_variant	0	0	-	-	-	-	-2.0851	0.0187	0.0792	0.428	|	2.50212	0.00567	0.001	0.423	|	1	16	0.0625	1	9	0.111111	1	14	0.0714286	1	11	0.0909091	0	7	0	1	14	0.0714286	|	0	10	0	0	9	0
chr11	28545299	-	T	chr11:28545299	Ccdc85a	LTR	Intron	intron_variant	0	0	-	-	-	-	-5.10141	0.0029	0.0996	0.0631	|	-4.41038	0.001	0.0213	0.197	|	3	19	0.157895	1	25	0.04	5	32	0.15625	1	41	0.0243902	0	21	0	0	14	0	|	3	13	0.230769	0	13	0
chr11	28545334	-	T	chr11:28545334	Ccdc85a	LTR	Intron	intron_variant	0	0	28546170	836	upstream	intronic	-2.29089	0.0239	0.117	0.423	|	1.20244	0.0941	0.0409	0.698	|	3	18	0.166667	2	26	0.0769231	3	24	0.125	4	39	0.102564	2	15	0.133333	0	17	0	|	4	13	0.307692	2	9	0.222222
chr11	28545338	-	T	chr11:28545338	Ccdc85a	LTR	Intron	intron_variant	0	0	-	-	-	-	-0.853765	0.127	0.23	0.307	|	-0.245119	0.175	0.207	0.766	|	4	17	0.235294	5	26	0.192308	7	26	0.269231	5	38	0.131579	4	15	0.266667	1	17	0.0588235	|	6	13	0.461538	2	9	0.222222
chr11	28546033	-	T	chr11:28546033	Ccdc85a	LTR	Intron	intron_variant	0	0	-	-	-	-	-0.356836	0.231	0.295	0.369	|	2.42315	0.248	0.0463	0.476	|	8	22	0.363636	6	31	0.193548	15	41	0.365854	9	45	0.2	8	29	0.275862	4	18	0.222222	|	5	14	0.357143	0	6	0
chr11	28548653	-	T	chr11:28548653	Ccdc85a	LTR	Intron	intron_variant	0	0	-	-	-	-	-0.234011	0.0478	0.0562	0.802	|	5.25247	0.148	0.00389	0.114	|	1	18	0.0555556	1	19	0.0526316	2	33	0.0606061	1	40	0.025	1	34	0.0294118	4	27	0.148148	|	0	11	0	0	12	0
chr11	28548659	-	T	chr11:28548659	Ccdc85a	LTR	Intron	intron_variant	0	0	-	-	-	-	0.594786	0.112	0.0742	0.494	|	2.61474	0.169	0.0276	0.394	|	2	18	0.111111	1	24	0.0416667	3	34	0.0882353	2	41	0.0487805	4	32	0.125	6	26	0.230769	|	3	13	0.230769	1	11	0.0909091
chr11	28548687	-	T	chr11:28548687	Ccdc85a	LTR	Intron	intron_variant	0	0	-	-	-	-	-0.229148	0.223	0.262	0.633	|	-0.231715	0.175	0.205	0.818	|	6	23	0.26087	5	22	0.227273	10	33	0.30303	9	45	0.2	5	34	0.147059	11	29	0.37931	|	6	18	0.333333	4	11	0.363636
[truncated: 13,497 more rows]
[truncated: 13 more columns]

## Sheet: README
Supplemental Table S7: Editing sites detected in cortex of wt, Nova1-/-, and Nova2-/- knockout mice. Re-analysis of publicly available RNA-seq data from cortices of 6 wildtype and 3 Nova1-/- and 3 Nova2-/- mice. The reads were mapped to the mouse genome (mm10) and the editing level of known editing sites (our Nascent-seq data plus RADAR and DARNED editing sites) was calculated. Finally, differenc…
[truncated: 36 more rows]
